# Supplementary material for: Indigenous infants in remote Australia retain an ancestral gut microbiome despite encroaching Westernization
Source: Research Square preprint supplement (doi:10.21203/rs.3.rs-6101879/v1), 2025-03-13
Supplement: Supplementary file 2 [file 981edc48bc329b909ea7c21f.xlsx]

## Sheet: Sheet1
ID*	Age_days	Sex	Pair
elcho01	35	F	2
elcho02	35	F	3
elcho03	56	F	5
elcho04	60	F	7
elcho05	100	F	6
elcho06	149	F	11
elcho07	164	F	8
elcho08	166	F	13
elcho09	214	F	15
elcho10	217	F	16
elcho11	245	F	17
elcho12	279	F	21
elcho13	308	F	23
elcho14	311	F	24
elcho15	332	F	25
elcho16	356	F	28
elcho17	367	F	29
elcho18	405	F	35
elcho19	436	F	39
elcho20	441	F	37
elcho21	549	F	45
elcho22	571	F	46
elcho23	594	F	50
elcho24	617	F	49
elcho25	22	M	1
elcho26	47	M	4
elcho27	118	M	10
elcho28	147	M	9
elcho29	160	M	12
elcho30	205	M	14
elcho31	228	M	18
elcho32	240	M	20
elcho33	250	M	19
elcho34	285	M	22
elcho35	329	M	26
elcho36	333	M	31
elcho37	346	M	27
elcho38	374	M	30
elcho39	380	M	32
elcho40	382	M	33
elcho41	431	M	36
elcho42	462	M	40
elcho43	463	M	38
elcho44	476	M	34
elcho45	476	M	41
elcho46	511	M	42
elcho47	511	M	43
elcho48	537	M	44
elcho49	566	M	47
elcho50	567	M	48
endia01	16	F	2
endia02	27	F	3
endia03	74	F	5
endia04	84	F	6
endia05	90	F	7
endia06	97	F	8
endia07	163	F	11
endia08	174	F	13
endia09	203	F	15
endia10	223	F	16
endia11	233	F	17
endia12	280	F	21
endia13	306	F	23
endia14	310	F	24
endia15	328	F	25
endia16	364	F	28
endia17	367	F	29
endia18	410	F	35
endia19	440	F	37
endia20	461	F	39
endia21	553	F	45
endia22	565	F	46
endia23	580	F	49
endia24	589	F	50
endia25	13	M	1
endia26	73	M	4
endia27	112	M	9
endia28	120	M	10
endia29	172	M	12
endia30	197	M	14
endia31	235	M	18
endia32	255	M	19
endia33	258	M	20
endia34	283	M	22
endia35	331	M	26
endia36	347	M	27
endia37	375	M	30
endia38	378	M	31
endia39	379	M	32
endia40	393	M	33
endia41	394	M	34
endia42	422	M	36
endia43	458	M	38
endia44	462	M	40
endia45	480	M	41
endia46	506	M	42
endia47	512	M	43
endia48	533	M	44
endia49	566	M	47
endia50	573	M	48
		*elcho=Early Life Child Health Observation study (Indigenous infants);
			*endia=Environmental Determinants of Islet Autoimmunity study (Non-indigenous infants)
