# Supplementary material for: Indigenous infants in remote Australia retain an ancestral gut microbiome despite encroaching Westernization
Source: Research Square preprint supplement (doi:10.21203/rs.3.rs-6101879/v1), 2025-03-13
Supplement: Supplementary file 3 [file c8e15020e5841abb7228dd9e.xlsx]

## Sheet: viruses
SampleID		elcho01	elcho02	elcho03	elcho04	elcho05	elcho06	elcho07	elcho08	elcho09	elcho10	elcho11	elcho12	elcho13	elcho14	elcho15	elcho16	elcho17	elcho18	elcho19	elcho20	elcho21	elcho22	elcho23	elcho24	elcho25	elcho26	elcho27	elcho28	elcho29	elcho30	elcho31	elcho32	elcho33	elcho34	elcho35	elcho36	elcho37	elcho38	elcho39	elcho40	elcho41	elcho42	elcho43	elcho44	elcho45	elcho46	elcho47	elcho48
Study		elcho	elcho	elcho	elcho	elcho	elcho	elcho	elcho	elcho	elcho	elcho	elcho	elcho	elcho	elcho	elcho	elcho	elcho	elcho	elcho	elcho	elcho	elcho	elcho	elcho	elcho	elcho	elcho	elcho	elcho	elcho	elcho	elcho	elcho	elcho	elcho	elcho	elcho	elcho	elcho	elcho	elcho	elcho	elcho	elcho	elcho	elcho	elcho
Age_days		35	35	56	60	100	149	164	166	214	217	245	279	308	311	332	356	367	405	436	441	549	571	594	617	22	47	118	147	160	205	228	240	250	285	329	333	346	374	380	382	431	462	463	476	476	511	511	537
Age_cat		age0	age0	age0	age0	age0	age0	age1	age1	age1	age1	age1	age1	age2	age2	age2	age2	age2	age2	age2	age2	age3	age3	age3	age3	age0	age0	age0	age0	age1	age1	age1	age1	age1	age1	age2	age2	age2	age2	age2	age2	age2	age3	age3	age3	age3	age3	age3	age3
Sex		F	F	F	F	F	F	F	F	F	F	F	F	F	F	F	F	F	F	F	F	F	F	F	F	M	M	M	M	M	M	M	M	M	M	M	M	M	M	M	M	M	M	M	M	M	M	M	M
																						ELCHO
s	species	elcho01	elcho02	elcho03	elcho04	elcho05	elcho06	elcho07	elcho08	elcho09	elcho10	elcho11	elcho12	elcho13	elcho14	elcho15	elcho16	elcho17	elcho18	elcho19	elcho20	elcho21	elcho22	elcho23	elcho24	elcho25	elcho26	elcho27	elcho28	elcho29	elcho30	elcho31	elcho32	elcho33	elcho34	elcho35	elcho36	elcho37	elcho38	elcho39	elcho40	elcho41	elcho42	elcho43	elcho44	elcho45	elcho46	elcho47	elcho48
d__Viruses|k__Heunggongvirae|p__Uroviricota|c__Caudoviricetes|f__Peduoviridae|g__Quadragintavirus|s__Quadragintavirus ev129	Quadragintavirus ev129	135976	57431	87712	86901	34300	75463	137797	90847	72144	54269	54188	186907	82898	127483	9294	41254	119130	77081	869	71336	77469	158795	75241	103177	76297	90270	87739	75831	51344	61711	87251	157619	138175	41579	182898	86098	61739	45763	224260	46860	68021	70766	91776	140084	133864	155313	78542	71481
d__Viruses|k__Heunggongvirae|p__Uroviricota|c__Caudoviricetes|f__Straboviridae|g__Tequatrovirus|s__Tequatrovirus kaw	Tequatrovirus kaw	23490	9931	18370	17754	3085	8709	58274	29672	8784	3859	3702	40424	20420	24450	448	4078	21999	13769	170	13821	3919	67058	992	10453	36012	19578	12016	12951	5682	129385	17545	33750	22910	5401	22394	24907	4668	5326	43043	9400	13194	15060	18192	26758	21227	21678	11901	11633
d__Viruses|k__Heunggongvirae|p__Uroviricota|c__Caudoviricetes|f__Straboviridae|g__Tequatrovirus|s__Tequatrovirus gee4507	Tequatrovirus gee4507	25411	12714	17669	20617	4723	10624	31002	29443	11993	4401	759	39053	24487	29636	574	5143	26554	16833	182	15724	929	34562	699	1458	18931	19208	16973	15328	9081	1186	19931	34893	25681	5972	32450	27926	768	6089	47676	11046	15810	14299	21829	30131	27366	25846	16430	15688
d__Viruses|k__Heunggongvirae|p__Uroviricota|c__Caudoviricetes|f__Peduoviridae|g__Evevirus|s__Evevirus ev239	Evevirus ev239	53478	29617	29683	42474	14683	30188	55803	50358	39780	13456	119739	65967	46411	57146	1033	15293	52074	37937	402	28504	4351	71917	4357	379253	28927	34785	44616	41031	29445	3113	38026	62419	52950	11774	96723	47461	189821	12458	88153	20448	32027	27650	40422	69804	69037	63896	38862	31421
d__Viruses|k__Heunggongvirae|p__Uroviricota|c__Caudoviricetes|f__Peduoviridae|g__Peduovirus|s__Peduovirus P22H1	Peduovirus P22H1	32747	12986	23126	24093	5895	15199	35620	28573	12549	10983	13388	47205	12195	31800	2072	8430	30288	17408	250	17646	17324	40352	19239	30880	24332	22978	16290	16906	8139	15306	22983	41835	31724	11144	35651	24157	15810	11645	64614	12300	17025	20627	24057	33127	28495	40472	17940	15481
d__Viruses|k__Heunggongvirae|p__Uroviricota|c__Caudoviricetes|g__Moineauvirus|s__Streptococcus phage CHPC1062	Streptococcus phage CHPC1062	4113	1169	2736	2262	310	1199	4351	3340	893	683	1179	6969	1974	3485	239	482	2838	1549	64	1783	1480	3872	2035	3106	3695	3069	1407	1340	535	1100	2220	5631	3653	1028	1885	3080	1385	875	5877	1293	1901	2084	2308	3179	2445	3541	1379	1458
d__Viruses|k__Heunggongvirae|p__Uroviricota|c__Caudoviricetes|f__Peduoviridae|g__Eganvirus|s__Eganvirus SW9	Eganvirus SW9	13533	7235	8628	12922	2053	5107	15034	20601	5573	2823	236	22129	14618	17380	265	2794	17514	8993	136	9275	718	21506	430	388	12194	11111	7399	8152	3846	711	12299	17555	13607	3564	15602	18213	257	3791	29570	7046	8804	10335	12922	15503	14265	9264	10144	8646
d__Viruses|k__Heunggongvirae|p__Uroviricota|c__Caudoviricetes|f__Peduoviridae|g__Quadragintavirus|s__Quadragintavirus ev040	Quadragintavirus ev040	2961	1303	1635	2016	911	2244	2730	1801	1851	1161	1212	3584	1580	2667	147	1087	2777	1678	31	1521	1788	3496	1537	2080	1380	1927	2041	1693	1283	1530	1965	3332	3009	909	4583	1741	1367	1032	5036	923	1452	1639	1933	3146	3096	3666	2020	1572
d__Viruses|k__Heunggongvirae|p__Uroviricota|c__Caudoviricetes|g__Moineauvirus|s__Streptococcus phage D1024	Streptococcus phage D1024	4372	1606	2401	2974	549	1370	4697	5040	1267	525	187	7542	3384	3923	79	604	3620	2008	36	2047	144	4873	194	243	2652	4189	2107	1857	963	212	2767	6231	4419	820	4112	4770	145	767	6614	1659	2487	2022	2884	3845	3319	4412	2051	1898
d__Viruses|k__Heunggongvirae|p__Uroviricota|c__Caudoviricetes|f__Peduoviridae|g__Peduovirus|s__Peduovirus P22H4	Peduovirus P22H4	6652	3535	4694	6403	1129	2804	7834	10033	3224	1602	348	10215	6908	8398	154	1623	8661	4846	72	4521	2744	11088	378	347	5663	5185	4013	4082	2225	1870	6316	9138	6709	2036	8476	8694	223	2034	14840	3484	4359	4902	6253	8458	7572	10187	5061	4116
d__Viruses|k__Heunggongvirae|p__Uroviricota|c__Caudoviricetes|g__Jouyvirus|s__Jouyvirus ev207	Jouyvirus ev207	19740	8664	13604	12636	4866	9710	21529	14452	9232	6059	8223	28062	3017	20595	1296	5320	18035	11556	123	11450	11040	24281	12312	18426	15021	13356	12031	10929	6613	8377	13497	24085	20464	7150	21898	14580	9146	6599	34850	7181	10272	11299	15342	21401	18337	22773	10511	11525
d__Viruses|k__Heunggongvirae|p__Uroviricota|c__Caudoviricetes|g__Jouyvirus|s__Jouyvirus ev017	Jouyvirus ev017	41407	19731	21836	28262	10980	17664	41463	39075	26556	7973	2491	62339	279916	37495	864	9971	42516	23954	256	19985	3148	48110	1221	3743	25107	29769	31152	26273	18468	2878	27506	48995	41102	10155	60146	36586	2238	8342	59762	15322	22646	19210	26557	46049	44174	25542	26253	22192
d__Viruses|k__Heunggongvirae|p__Uroviricota|c__Caudoviricetes|g__Cronusvirus|s__Cronusvirus cronus	Cronusvirus cronus	115	46	43	85	22	50	103	120	50	41	19	142	100	115	5	27	110	56	1	54	33	191	43	46	74	90	55	94	36	28	78	86	118	45	149	128	34	31	215	46	62	74	84	157	128	150	78	63
d__Viruses|k__Heunggongvirae|p__Uroviricota|c__Caudoviricetes|g__Radostvirus|s__Radostvirus ev099	Radostvirus ev099	17866	7626	13019	11190	4869	9349	19027	11762	9240	6074	6976	24408	8693	15820	897	5921	15263	8987	104	8696	8724	18992	9438	12212	11337	11487	11921	10187	6191	8025	11861	22196	20812	9352	21611	11721	7460	5877	27216	6296	8572	9468	11114	19050	15674	18874	9354	8086
d__Viruses|k__Heunggongvirae|p__Uroviricota|c__Caudoviricetes|g__Ficleduovirus|s__Ficleduovirus FCV1	Ficleduovirus FCV1	63	22	34	33	7	20	65	58	13	4	7	175	40	61	2	14	36	30	0	36	9	65	13	8	37	77	28	15	8	5	52	70	67	8	37	45	8	12	98	12	26	30	33	51	43	46	31	32
d__Viruses|k__Heunggongvirae|p__Uroviricota|c__Caudoviricetes|f__Casjensviridae|s__Ruegeria phage vB_RpoS-V18	Ruegeria phage vB_RpoS-V18	8	22	68	45	33	55	24	14	29	41	5	23	49	55	8	28	45	1	2	11	4	18	5	9	9	7	34	4	17	4	53	85	111	9	17	6	8	40	140	27	57	56	38	3	5	48	42	3
d__Viruses|k__Heunggongvirae|p__Uroviricota|c__Caudoviricetes|f__Autographiviridae|g__Friunavirus|s__Friunavirus AbKT21III	Friunavirus AbKT21III	2	0	0	0	0	0	3	8	12	221	3040	1	31	2	24	559	1	61	0	42	251760	9	329704	325	6	0	152	32	12	150	23	0	1	12	1	0	139	0	0	94	0	2	0	49	326	426797	19	0
d__Viruses|k__Bamfordvirae|p__Nucleocytoviricota|c__Pokkesviricetes|o__Chitovirales|f__Poxviridae|g__Oryzopoxvirus|s__BeAn 58058 virus	BeAn 58058 virus	2078	34	179	2	2	32	1081	0	18	4	0	5740	0	0	0	5	0	9	1	2	0	0	0	7	15	4440	105	4	1	15	4	1384	1982	5	0	251	5	3	0	37	663	0	4	55	8	0	0	0
d__Viruses|k__Heunggongvirae|p__Uroviricota|c__Caudoviricetes|f__Vilmaviridae|g__Kumaovirus|s__Kumaovirus kumao	Kumaovirus kumao	2	11	0	1	1	4	0	6	2	0	115	0	18	62	0	2	0	52	22	98	11	9	40	0	0	1	0	3	2	11	0	1	2	0	6	0	2	59	54	16	15	4	46	1	1	2	2	55
d__Viruses|k__Heunggongvirae|p__Uroviricota|c__Caudoviricetes|s__Gordonia phage Neville	Gordonia phage Neville	83	20	76	28	240	77	78	64	95	96	0	8	1	0	16	72	6	30	0	0	13	0	2	50	1	25	186	171	182	60	47	51	32	2	231	2	98	13	0	5	43	0	8	30	25	29	12	0
d__Viruses|k__Heunggongvirae|p__Uroviricota|c__Caudoviricetes|f__Straboviridae|g__Lasallevirus|s__Acinetobacter virus Acj61	Acinetobacter virus Acj61	0	28	0	3	0	0	0	0	9	38	0	3	26	0	3	5	7	3	0	0	11	1	0	22	0	0	1	33	0	52	9	0	0	0	0	15	13	0	0	11	94	0	19	92	29	4	0	0
d__Viruses|k__Heunggongvirae|p__Uroviricota|c__Caudoviricetes|s__Enterobacteria phage phiP27	Enterobacteria phage phiP27	0	274	17	28	701	0	64	4	664	57	0	711	39	0	0	1436	51	270	2	2	8	3	1	22	28	3	45	29	0	176	74	40	171	78	8	11	44	78	13	25	312	0	15	221	144	12	0	0
d__Viruses|k__Heunggongvirae|p__Uroviricota|c__Caudoviricetes|g__Myrnavirus|s__Myrnavirus myrna	Myrnavirus myrna	16	17	53	11	130	33	50	6	42	57	0	29	8	0	16	51	5	14	0	2	6	0	2	20	0	4	123	73	48	11	19	11	12	1	42	1	58	0	4	7	32	4	8	16	3	10	7	0
d__Viruses|k__Heunggongvirae|p__Uroviricota|c__Caudoviricetes|g__Marienburgvirus|s__Marienburgvirus BP4795	Marienburgvirus BP4795	0	809	25	14	676	0	2442	238	1580	143	0	728	170	0	7	542	1022	248	30	17	13	27	3	309	333	61	991	729	0	192	1211	950	4667	4771	91	760	59	65	64	587	272	4	12	7230	176	24	0	0
d__Viruses|k__Heunggongvirae|p__Uroviricota|c__Caudoviricetes|s__Aeromonas phage LAh10	Aeromonas phage LAh10	25	44	20	0	12	25	38	1	32	9	3	10	26	2	0	13	16	1	2	6	2	3	6	4	34	6	25	13	22	9	36	27	64	71	4	13	2	1	4	19	2	39	1	47	4	1	1	0
d__Viruses|k__Heunggongvirae|p__Uroviricota|c__Caudoviricetes|f__Peduoviridae|s__Yersinia phage vB_YenM_42.18	Yersinia phage vB_YenM_42.18	0	8	1	1	0	0	22	0	0	2	0	3	0	0	1	9	0	0	0	1	0	0	0	3	1	0	0	0	0	0	0	0	40	6	0	0	0	1	0	0	1	1	0	0	0	1	0	0
d__Viruses|k__Heunggongvirae|p__Uroviricota|c__Caudoviricetes|g__Lambdavirus|s__Enterobacteria phage HK225	Enterobacteria phage HK225	0	11	0	1	0	0	1	0	137	0	0	18	10	0	0	31	0	0	0	0	0	0	0	15	15	0	12	16	93	0	1	1	2	2	0	7	0	1	5	2	0	0	0	0	4	4	0	0
d__Viruses|k__Heunggongvirae|p__Uroviricota|c__Caudoviricetes|s__Enterobacter phage vB_EclS_CobraSix	Enterobacter phage vB_EclS_CobraSix	22	0	0	5	14	1	1	2	1198	0	0	0	0	0	0	0	5	6	0	0	0	0	0	2	19	0	4	2	313	0	0	112	1	5	0	5	0	0	9	75	6	1	0	32	0	9	2	0
d__Viruses|k__Heunggongvirae|p__Uroviricota|c__Caudoviricetes|g__Yongloolinvirus|s__Yongloolinvirus C2	Yongloolinvirus C2	0	0	0	4	0	0	0	0	0	0	0	0	0	0	0	0	0	0	0	0	0	0	0	36	3	0	0	0	0	0	0	0	9	6	0	0	0	0	0	0	0	0	0	0	0	0	0	0
d__Viruses|k__Heunggongvirae|p__Uroviricota|c__Caudoviricetes|f__Peduoviridae|g__Eganvirus|s__Eganvirus ev186	Eganvirus ev186	0	1	0	0	0	0	0	0	1	147	0	0	0	0	0	0	0	0	0	0	0	0	0	0	0	0	0	0	1	0	0	1	0	0	0	3	0	0	0	1	0	0	1	0	0	1	0	0
d__Viruses|k__Heunggongvirae|p__Uroviricota|c__Caudoviricetes|g__Sherbrookevirus|s__Sherbrookevirus CDHM13	Sherbrookevirus CDHM13	0	0	0	0	0	0	0	0	0	0	0	0	0	0	0	0	0	0	0	0	1	0	0	176	0	0	0	0	0	0	0	0	74	5	0	3	0	0	0	0	0	0	0	0	0	0	0	0
d__Viruses|k__Heunggongvirae|p__Uroviricota|c__Caudoviricetes|s__Salmonella phage ST64B	Salmonella phage ST64B	0	1	1	4	3	0	77	0	0	0	0	5	0	0	0	1	0	0	0	2	0	4	0	0	0	0	0	0	3	0	91	29	94	0	0	0	0	0	0	15	0	0	0	0	0	4	0	0
d__Viruses|k__Heunggongvirae|p__Uroviricota|c__Caudoviricetes|g__Busanvirus|s__Busanvirus ACP17	Busanvirus ACP17	0	25	0	41	0	2	0	112	0	2	20	0	34	26	47	5	96	23	10	81	6	45	36	108	0	0	0	0	0	4	101	0	4	39	10	42	30	64	25	72	12	44	12	0	3	90	154	6
d__Viruses|k__Heunggongvirae|p__Uroviricota|c__Caudoviricetes|o__Crassvirales|f__Suoliviridae|g__Cohcovirus|s__Cohcovirus splanchnicus	Cohcovirus splanchnicus	1	0	0	0	0	0	0	0	0	0	2	1	1	5	964	0	0	1	2	7	0	132	3	37	0	0	0	1	0	0	0	0	0	44	0	0	0	28	5	142	1	33	1	0	0	57	33	0
d__Viruses|k__Heunggongvirae|p__Uroviricota|c__Caudoviricetes|f__Peduoviridae|g__Eganvirus|s__Eganvirus EtG	Eganvirus EtG	0	0	0	0	0	0	0	0	1	294	0	0	0	0	0	0	0	0	0	0	0	0	0	0	0	0	0	0	26	0	0	0	0	2	0	0	1	0	0	0	0	0	0	0	0	5	0	0
d__Viruses|k__Heunggongvirae|p__Uroviricota|c__Caudoviricetes|f__Peduoviridae|g__Peduovirus|s__Peduovirus pro483	Peduovirus pro483	0	0	0	3	0	0	0	6	43	26	0	13	1	0	0	51	0	20	0	32	0	0	0	6	109	0	0	0	0	116	0	2	3	0	1	2	0	37	5	0	0	0	0	0	6	5	0	0
d__Viruses|k__Heunggongvirae|p__Uroviricota|c__Caudoviricetes|g__Lubbockvirus|s__Lubbockvirus CD119	Lubbockvirus CD119	0	0	0	0	0	0	0	0	0	0	0	0	0	0	0	0	0	1	0	0	0	0	0	90	86	0	0	0	0	0	0	0	17	0	0	0	0	0	0	0	0	0	0	1	0	0	0	0
d__Viruses|k__Heunggongvirae|p__Uroviricota|c__Caudoviricetes|o__Crassvirales|f__Steigviridae|g__Lahndsivirus|s__Lahndsivirus rarus	Lahndsivirus rarus	2	0	1	0	0	8	0	2	1	1	3	1	2	80	1	3	0	19	5	1	10	26	1	4	3	1	0	1	0	1	1	1	2	0	0	1	2	10	1	0	3	0	1	2	2	3	3	104
d__Viruses|k__Heunggongvirae|p__Uroviricota|c__Caudoviricetes|s__Clostridium phage c-st	Clostridium phage c-st	3	0	0	0	0	1	0	0	0	1	0	0	1	0	0	0	1	0	0	3	0	3	5	0	1	0	1	0	0	0	0	0	0	0	0	0	0	0	1	0	0	0	0	0	0	4	11	0
d__Viruses|k__Heunggongvirae|p__Uroviricota|c__Caudoviricetes|f__Herelleviridae|g__Tsarbombavirus|s__Tsarbombavirus BCP78	Tsarbombavirus BCP78	0	1	0	1	0	1	0	0	0	2	0	1	4	4	1	1	1	1	0	1	1	1	1	3	89	0	0	0	0	11	2	0	0	0	0	10	0	2	1	0	0	6	0	3	0	6	1	0
d__Viruses|k__Heunggongvirae|p__Uroviricota|c__Caudoviricetes|g__Colneyvirus|s__Colneyvirus CD27	Colneyvirus CD27	0	0	0	0	0	0	0	0	0	0	0	0	0	0	0	0	0	0	0	0	0	0	0	39	1	0	0	0	0	0	0	0	4	0	0	0	0	0	0	0	0	0	0	0	0	0	0	0
d__Viruses|k__Heunggongvirae|p__Uroviricota|c__Caudoviricetes|g__Lambdavirus|s__Enterobacteria phage phi80	Enterobacteria phage phi80	61	2	0	0	4	16	0	0	225	1	0	3	1	0	0	3	7	2	0	4	0	0	0	5	4	0	1	3	206	6	2	7	1	21	0	0	5	1	4	2	4	0	0	18	4	4	0	0
d__Viruses|k__Heunggongvirae|p__Uroviricota|c__Caudoviricetes|s__Escherichia phage HK639	Escherichia phage HK639	49	20	5	2	5	99	13	1	309	8	0	5	8	0	0	8	4	3	1	2	0	1	0	6	6	4	13	6	1061	6	12	11	56	36	3	1	2	2	7	17	2	2	0	15	3	5	2	0
d__Viruses|k__Heunggongvirae|p__Uroviricota|c__Caudoviricetes|f__Herelleviridae|g__Moonbeamvirus|s__Moonbeamvirus moonbeam	Moonbeamvirus moonbeam	12	49	69	1	0	135	305	0	13	9	1	53	2	2	0	9	2	0	0	3	3	3	9	1	0	4	7	0	1	1	15	38	1	0	0	21	1	4	1	13	30	1	4	20	43	1	3	2
d__Viruses|k__Heunggongvirae|p__Uroviricota|c__Caudoviricetes|g__Colneyvirus|s__Colneyvirus CDKM15	Colneyvirus CDKM15	0	0	0	2	0	0	0	0	0	0	0	0	0	0	1	0	0	0	0	0	0	0	0	57	4	0	0	0	0	0	0	0	6	0	0	0	0	0	0	0	0	0	0	0	0	0	0	0
d__Viruses|k__Heunggongvirae|p__Uroviricota|c__Caudoviricetes|f__Straboviridae|g__Mylasvirus|s__Mylasvirus persius	Mylasvirus persius	3	0	1	1	0	14	2	0	6	1	0	0	0	11	0	1	0	1	2	1	0	8	6	0	134	0	1	0	0	1	3	1	7	0	0	19	2	6	4	0	0	5	0	0	2	2	2	0
d__Viruses|k__Heunggongvirae|p__Uroviricota|c__Caudoviricetes|g__Menderavirus|s__Menderavirus mendera	Menderavirus mendera	0	18	12	0	7	0	10	0	11	6	1	5	0	1	0	9	0	2	3	4	1	2	9	0	0	17	1	0	13	3	0	1	13	0	0	4	0	0	1	10	5	0	2	1	1	0	2	0
d__Viruses|k__Heunggongvirae|p__Uroviricota|c__Caudoviricetes|g__Sarumanvirus|s__Sarumanvirus bcepsauron	Sarumanvirus bcepsauron	0	4	0	1	0	149	0	2	3	0	0	0	0	0	0	1	0	3	0	0	0	0	1	0	0	0	0	0	0	2	0	0	0	1	0	34	6	1	0	14	2	3	0	0	1	0	1	0
d__Viruses|k__Heunggongvirae|p__Uroviricota|c__Caudoviricetes|g__Lacusarxvirus|s__Lacusarxvirus lacusarx	Lacusarxvirus lacusarx	0	0	0	0	0	0	0	0	1	3	13	0	2	12	2	3	2	0	14	8	2	6	52	0	0	0	0	0	0	1	0	4	1	0	2	12	1	11	9	0	0	15	0	2	2	4	2	0
d__Viruses|k__Heunggongvirae|p__Uroviricota|c__Caudoviricetes|o__Crassvirales|f__Suoliviridae|g__Buchavirus|s__Buchavirus hominis	Buchavirus hominis	0	30	0	20	0	1	1	107	0	0	3237	0	31	14	37	2	53	17	19	37	4	11	27	84	50	0	0	1	0	4	101	1	0	74	19	57	389	75	11	224	4	70	2	0	0	52	54	0
d__Viruses|k__Heunggongvirae|p__Uroviricota|c__Caudoviricetes|f__Straboviridae|g__Gualtarvirus|s__Gualtarvirus mp1	Gualtarvirus mp1	13	2	0	5	1	6	5	0	8	6	10	0	7	6	10	16	3	5	2	1	0	11	4	3	1	0	0	0	17	10	2	1	3	2	1	3	8	7	7	35	0	6	5	3	2	15	8	1
d__Viruses|k__Heunggongvirae|p__Uroviricota|c__Caudoviricetes|f__Straboviridae|g__Ishigurovirus|s__Ishigurovirus osborne	Ishigurovirus osborne	0	24	9	0	11	0	2	3	6	0	7	3	8	5	13	0	3	41	0	9	1	27	11	1	0	8	0	4	1	1	3	1	5	105	2	8	1	16	2	5	1	4	2	3	0	1	0	1
d__Viruses|k__Heunggongvirae|p__Uroviricota|c__Caudoviricetes|g__Marfavirus|s__Marfavirus F48	Marfavirus F48	11	18	17	2	1	27	66	1	3	5	8	10	3	13	7	15	2	8	1	2	5	14	13	3	33	0	1	0	0	6	4	6	6	0	0	41	3	11	11	4	10	9	0	9	21	6	12	0
d__Viruses|k__Heunggongvirae|p__Uroviricota|c__Caudoviricetes|s__Enterococcus phage vB_EfaS_IME197	Enterococcus phage vB_EfaS_IME197	0	15	0	4	9	19	0	0	14	0	3	0	0	2	2	2	2	0	0	0	0	1	2	0	0	0	1	4	0	5	0	4	0	0	0	0	6	6	3	0	0	0	0	4	1	4	0	0
d__Viruses|k__Heunggongvirae|p__Uroviricota|c__Caudoviricetes|o__Crassvirales|f__Crevaviridae|g__Kingevirus|s__Kingevirus communis	Kingevirus communis	6	17	13	3	0	60	82	4	8	14	1	19	0	3	0	3	0	0	0	3	1	4	10	1	430	0	0	4	0	4	4	5	4	0	0	6	1	0	1	2	9	0	2	3	13	2	1	0
d__Viruses|k__Heunggongvirae|p__Uroviricota|c__Caudoviricetes|g__Erskinevirus|s__Erskinevirus EaH2	Erskinevirus EaH2	11	59	26	32	2	1	12	198	4	0	29	2	40	32	34	0	108	31	2	52	0	36	34	132	3	3	10	0	5	15	139	11	11	95	5	114	61	67	35	96	8	78	10	10	2	65	67	1
non-sig
d__Viruses|k__Heunggongvirae|p__Uroviricota|c__Caudoviricetes|g__Yongloolinvirus|s__Yongloolinvirus CDMH1	Yongloolinvirus CDMH1	0	0	0	0	0	0	0	0	0	0	0	0	0	0	0	0	0	0	0	0	0	0	0	127	20	0	0	0	0	0	0	0	38	7	0	0	0	0	1	0	0	0	0	0	0	0	0	0
d__Viruses|k__Heunggongvirae|p__Uroviricota|c__Caudoviricetes|g__Colneyvirus|s__Colneyvirus CD505	Colneyvirus CD505	0	0	0	1	0	0	0	0	0	0	0	0	0	0	0	0	0	0	0	0	0	0	0	25	4	0	0	0	0	0	0	0	4	1	0	0	0	0	0	0	0	0	0	0	0	0	0	0
d__Viruses|k__Heunggongvirae|p__Uroviricota|c__Caudoviricetes|g__Aurunvirus|s__Aurunvirus STIM5	Aurunvirus STIM5	110	31	71	41	172	77	114	50	88	94	7	15	28	7	36	101	15	59	6	8	24	13	17	58	0	129	241	163	207	96	45	63	38	3	188	7	95	14	32	13	70	20	7	43	35	36	10	1
d__Viruses|k__Heunggongvirae|p__Uroviricota|c__Caudoviricetes|g__Colneyvirus|s__Colneyvirus MMP02	Colneyvirus MMP02	0	0	0	0	0	0	0	0	0	0	0	0	0	0	0	0	0	0	0	0	0	0	0	92	2	0	0	0	0	0	0	0	7	0	0	0	0	0	0	0	0	0	0	0	0	0	0	0
d__Viruses|k__Heunggongvirae|p__Uroviricota|c__Caudoviricetes|g__Yongloolinvirus|s__Yongloolinvirus MMP01	Yongloolinvirus MMP01	0	0	0	3	0	0	0	0	0	0	0	0	0	0	0	0	0	0	0	0	0	0	0	48	49	0	0	0	0	0	0	0	16	4	0	0	0	0	0	0	0	0	0	0	0	0	0	0
d__Viruses|k__Heunggongvirae|p__Uroviricota|c__Caudoviricetes|f__Peduoviridae|g__Irrigatiovirus|s__Irrigatiovirus SI7	Irrigatiovirus SI7	1	0	9	0	0	0	0	0	9	0	0	0	1	0	0	1	0	0	0	0	0	0	0	0	0	0	0	0	0	0	0	0	0	0	0	5	0	0	0	0	0	0	0	0	0	0	0	0
d__Viruses|k__Heunggongvirae|p__Uroviricota|c__Caudoviricetes|f__Mesyanzhinovviridae|s__Stenotrophomonas phage A1432	Stenotrophomonas phage A1432	0	0	0	0	0	0	0	0	0	0	0	1	2	2	4	1	1	0	0	0	0	0	8	0	0	0	0	1	0	4	1	0	0	0	0	3	0	4	2	0	0	2	0	6	3	2	5	0
d__Viruses|k__Heunggongvirae|p__Uroviricota|c__Caudoviricetes|g__Lambdavirus|s__Enterobacteria phage mEp237	Enterobacteria phage mEp237	0	18	19	5	16	19	25	4	122	4	0	7	11	0	0	29	2	6	0	0	1	1	0	0	31	0	31	36	48	18	33	24	40	59	2	14	0	1	2	18	0	0	1	0	2	4	0	0
d__Viruses|k__Heunggongvirae|p__Uroviricota|c__Caudoviricetes|f__Mesyanzhinovviridae|s__Janthinobacterium phage vB_JliM-Donnerlittchen	Janthinobacterium phage vB_JliM-Donnerlittchen	14	1	7	2	1	8	18	0	2	6	9	0	12	11	6	1	4	14	2	12	16	15	25	0	8	3	9	2	0	1	0	3	6	0	0	0	0	5	11	4	2	35	8	5	1	1	0	2
d__Viruses|k__Heunggongvirae|p__Uroviricota|c__Caudoviricetes|s__Arthrobacter phage Persistence	Arthrobacter phage Persistence	9	1	177	25	7	25	0	0	1	182	0	0	2	0	9	3	0	0	0	0	1	0	0	0	0	0	35	36	1	12	0	0	32	0	0	0	47	2	0	4	38	0	8	5	2	0	0	0
d__Viruses|k__Heunggongvirae|p__Uroviricota|c__Caudoviricetes|s__Clostridium phage vB_CpeS-CP51	Clostridium phage vB_CpeS-CP51	224	0	0	0	0	29	1	3	15	0	0	0	2	0	0	0	0	0	0	0	0	2	1	1	4	0	0	0	0	0	0	18	0	0	0	0	0	0	0	0	0	0	0	0	0	1	0	0
d__Viruses|k__Heunggongvirae|p__Uroviricota|c__Caudoviricetes|s__Rhodococcus phage E3	Rhodococcus phage E3	5	47	0	3	0	0	1	0	182	40	0	0	17	0	28	60	8	12	0	0	17	3	1	37	0	0	3	16	39	0	0	0	1	0	6	10	0	0	0	3	14	0	0	0	0	0	0	0
d__Viruses|k__Heunggongvirae|p__Uroviricota|c__Caudoviricetes|g__Jacevirus|s__Jacevirus jace	Jacevirus jace	193	28	83	53	287	89	82	46	100	149	12	3	4	20	25	78	7	21	30	0	22	24	3	63	0	298	203	160	226	73	27	65	30	0	186	1	107	18	7	8	63	34	9	62	43	40	13	0
d__Viruses|k__Heunggongvirae|p__Uroviricota|c__Caudoviricetes|f__Vilmaviridae|g__Bongovirus|s__Bongovirus reindeer	Bongovirus reindeer	3	0	121	4	339	1	1	0	78	21	0	12	0	0	1	48	0	11	0	0	0	0	0	33	0	0	148	176	5	2	7	3	0	0	0	0	32	0	0	0	44	2	0	5	0	1	0	0
d__Viruses|k__Heunggongvirae|p__Uroviricota|c__Caudoviricetes|f__Straboviridae|g__Zedzedvirus|s__Zedzedvirus zz1	Zedzedvirus zz1	0	0	0	0	0	0	0	0	0	0	0	0	2	0	8	0	3	12	0	41	0	0	2	0	0	0	0	0	1	0	0	0	0	1	0	0	1	5	0	0	0	0	0	0	1	37	89	0
d__Viruses|k__Heunggongvirae|p__Uroviricota|c__Caudoviricetes|f__Peduoviridae|g__Peduovirus|s__Peduovirus magyaro	Peduovirus magyaro	14	39	41	6	17	2	49	8	119	33	0	31	25	0	0	81	27	37	1	45	0	4	1	16	127	0	62	53	35	79	52	65	69	114	8	13	6	38	14	31	5	0	7	97	12	11	0	0
d__Viruses|k__Heunggongvirae|p__Uroviricota|c__Caudoviricetes|g__Saikungvirus|s__Saikungvirus HK75	Saikungvirus HK75	0	0	0	0	46	0	21	0	0	0	0	0	0	0	0	1	0	0	1	0	0	0	0	4	2	0	1	0	0	6	0	0	44	1	0	0	0	0	5	1	0	0	0	0	0	5	0	0
d__Viruses|k__Heunggongvirae|p__Uroviricota|c__Caudoviricetes|s__Enterococcus phage phiFL4A	Enterococcus phage phiFL4A	0	0	0	0	10	13	0	0	3	0	0	0	2	0	0	0	0	0	0	1	0	0	0	0	0	0	0	2	0	0	0	0	0	0	0	0	0	0	0	0	0	0	0	0	0	0	0	0
d__Viruses|k__Heunggongvirae|p__Uroviricota|c__Caudoviricetes|s__Clostridium phage phiCD211	Clostridium phage phiCD211	0	1	0	2	0	0	0	0	0	0	0	0	0	0	0	0	0	0	1	0	0	1	2	33	237	0	1	0	0	0	0	0	8	1	1	1	0	0	0	0	0	0	0	0	0	1	1	0
d__Viruses|k__Bamfordvirae|p__Preplasmiviricota|c__Tectiliviricetes|o__Rowavirales|f__Adenoviridae|g__Mastadenovirus|s__Human mastadenovirus C	Human mastadenovirus C	0	1	0	0	0	0	0	0	137	10	39	279	8	2	0	42	0	20	0	5	22	6231	0	3625	0	0	5389	0	8	66284	371	0	3	5	8	0	0	0	0	21	1	557	2	20	0	0	0	0
d__Viruses|k__Heunggongvirae|p__Uroviricota|c__Caudoviricetes|g__Sukhumvitvirus|s__Sukhumvitvirus T25	Sukhumvitvirus T25	0	3	4	15	0	10	5	7	11	2	4	1	3	5	0	0	5	3	0	3	0	6	2	3	3	0	1	3	1	16	0	2	10	0	1	1	1	1	3	1	3	3	5	5	32	0	1	2
d__Viruses|k__Heunggongvirae|p__Uroviricota|c__Caudoviricetes|g__Myrnavirus|s__Myranavirus phabba	Myranavirus phabba	10	20	0	11	14	18	38	3	10	43	0	32	7	0	26	30	5	8	0	0	3	0	1	7	1	5	43	24	25	0	15	18	12	0	17	1	26	1	10	6	22	5	4	4	3	1	6	0
d__Viruses|k__Heunggongvirae|p__Uroviricota|c__Caudoviricetes|g__Colneyvirus|s__Colneyvirus CDKM9	Colneyvirus CDKM9	0	0	0	0	0	0	0	0	0	0	0	0	0	0	0	0	0	0	0	0	0	0	0	25	6	0	0	0	0	0	0	0	6	0	0	0	0	0	0	0	0	0	0	1	0	0	0	0
d__Viruses|k__Heunggongvirae|p__Uroviricota|c__Caudoviricetes|f__Peduoviridae|g__Senquatrovirus|s__Senquatrovirus SEN4	Senquatrovirus SEN4	0	0	0	0	0	0	0	0	1	0	0	0	0	1	0	5	0	0	0	0	0	0	0	0	0	0	0	0	0	0	0	0	0	0	0	0	0	0	0	0	0	0	0	0	0	0	0	0
d__Viruses|k__Heunggongvirae|p__Uroviricota|c__Caudoviricetes|s__Enterobacterial phage mEp390	Enterobacterial phage mEp390	23	3	0	0	0	0	0	3	20	6	0	15	0	0	0	23	0	0	0	0	0	0	0	23	10	0	0	0	91	0	0	0	0	5	0	0	0	1	5	0	1	0	0	1	0	6	1	0
d__Viruses|k__Heunggongvirae|p__Uroviricota|c__Caudoviricetes|s__Enterococcus phage EFC-1	Enterococcus phage EFC-1	0	6	0	0	0	6	0	0	7	0	0	0	0	0	0	0	0	0	0	0	0	0	0	1	0	0	0	0	0	0	5	5	2	0	0	0	0	0	0	0	0	1	0	0	0	0	0	0
d__Viruses|k__Heunggongvirae|p__Uroviricota|c__Caudoviricetes|g__Wellingtonvirus|s__Wellingtonvirus wellington	Wellingtonvirus wellington	30	10	31	3	17	0	14	1	3	8	17	4	12	20	2	13	5	4	24	14	4	22	112	4	86	10	18	7	13	7	4	8	6	1	12	126	3	14	8	9	7	26	5	16	5	9	7	1
d__Viruses|k__Heunggongvirae|p__Uroviricota|c__Caudoviricetes|f__Vilmaviridae|g__Bongovirus|s__Bongovirus bongo	Bongovirus bongo	0	0	0	0	0	0	0	0	0	0	0	0	0	0	1	0	1	0	0	0	0	0	0	1	1	0	0	0	1	0	1	0	0	0	0	0	0	0	0	0	0	0	0	1	0	0	0	0
d__Viruses|k__Heunggongvirae|p__Uroviricota|c__Caudoviricetes|g__Sherbrookevirus|s__Sherbrookevirus MMP04	Sherbrookevirus MMP04	0	0	0	0	0	0	0	0	0	1	0	0	0	0	0	0	0	0	0	3	0	0	0	672	14	0	0	0	0	0	0	0	258	10	0	7	0	0	0	0	0	1	0	0	0	0	0	0
d__Viruses|k__Heunggongvirae|p__Uroviricota|c__Caudoviricetes|f__Schitoviridae|s__Alcaligenes phage vB_AfaP_QDWS595	Alcaligenes phage vB_AfaP_QDWS595	0	0	0	0	0	0	0	0	0	0	0	0	1	0	5	0	4	6	0	35	0	5	0	0	0	0	0	0	0	0	1	0	0	0	0	2	1	0	0	0	0	0	0	0	0	27	83	0
d__Viruses|k__Heunggongvirae|p__Uroviricota|c__Caudoviricetes|g__Sawaravirus|s__Sawaravirus WGPS2	Sawaravirus WGPS2	0	1712	6117	27	828	236	1043	590	1458	164	0	416	1486	0	26	1270	355	266	25	73	0	35	7	240	2762	46	3387	2786	519	216	1227	5061	1754	4484	141	384	147	99	104	3337	251	19	19	3486	232	354	7	0
d__Viruses|k__Heunggongvirae|p__Uroviricota|c__Caudoviricetes|g__Baikalvirus|s__Baikalvirus PaBG	Baikalvirus PaBG	0	9	0	2	2	0	1	1	1	0	1	0	6	2	112	0	1	23	1	18	18	20	1	1	0	0	0	2	2	1	2	1	0	180	6	1	1	21	0	1	0	1	0	0	0	1	2	2
d__Viruses|k__Heunggongvirae|p__Uroviricota|c__Caudoviricetes|g__Phifelvirus|s__Phifelvirus FL3	Phifelvirus FL3	0	16	0	0	0	42	3	0	2	0	0	0	0	0	0	0	0	0	0	1	0	0	0	0	0	0	20	0	0	0	0	8	2	0	0	0	0	5	0	0	0	0	0	0	0	0	0	0
d__Viruses|k__Heunggongvirae|p__Uroviricota|c__Caudoviricetes|s__Clostridium phage phiCD6356	Clostridium phage phiCD6356	0	0	0	0	0	0	0	0	0	0	0	0	0	0	0	0	0	0	0	0	0	2	0	62	6	0	0	0	0	0	0	0	4	4	0	0	0	0	0	0	0	0	0	0	0	0	0	0
d__Viruses|k__Heunggongvirae|p__Uroviricota|c__Caudoviricetes|s__Streptococcus phage SpSL1	Streptococcus phage SpSL1	92	8	392	6	17	2	0	0	3	7	0	8	1	2	0	3	0	0	0	0	0	0	0	3	0	6	42	1	3	10	0	13	3	0	0	3	2	0	1	0	12	0	0	3	2	0	1	0
d__Viruses|k__Heunggongvirae|p__Uroviricota|c__Caudoviricetes|o__Crassvirales|f__Intestiviridae|g__Endlipuvirus|s__Endlipuvirus intestinihominis	Endlipuvirus intestinihominis	0	0	0	0	0	0	1	0	0	0	1	0	2	1	12	0	1	10	10	47	0	20	2	0	0	0	0	0	0	0	0	0	0	0	0	0	0	10	0	0	1	0	0	0	0	28	125	0
d__Viruses|k__Heunggongvirae|p__Uroviricota|c__Caudoviricetes|g__Pankowvirus|s__Pankowvirus WGPS8	Pankowvirus WGPS8	0	81	0	2	148	0	63	82	132	7	0	55	29	0	1	72	76	35	2	10	0	1	0	46	30	3	96	77	0	50	121	99	115	286	22	23	21	6	31	73	9	0	0	770	27	6	0	0
d__Viruses|k__Heunggongvirae|p__Uroviricota|c__Caudoviricetes|g__Phifelvirus|s__Phifelvirus FL2	Phifelvirus FL2	0	5	2	0	0	18	2	0	7	0	0	0	0	0	0	0	0	0	0	0	0	0	0	2	0	0	0	0	0	0	0	7	1	0	0	0	0	0	0	0	0	0	0	0	0	0	0	0
d__Viruses|k__Heunggongvirae|p__Uroviricota|c__Caudoviricetes|f__Demerecviridae|g__Priunavirus|s__Priunavirus PSTCR5	Priunavirus PSTCR5	1	57	11	0	1	2	0	1	140	51	1	3	12	0	25	49	2	3	0	0	9	2	4	28	0	2	9	15	38	0	1	0	1	0	0	7	2	5	0	1	26	1	5	2	0	1	1	0
d__Viruses|k__Heunggongvirae|p__Uroviricota|c__Caudoviricetes|s__Streptococcus phage YMC-2011	Streptococcus phage YMC-2011	5	65	0	9	11	5	190	0	55	36	0	0	2	0	0	21	22	0	1	0	2	2	2	0	23	1	9	2	0	6	0	1060	0	0	3	1	1	0	1	1	1	0	0	17	2	0	0	2
d__Viruses|k__Heunggongvirae|p__Uroviricota|c__Caudoviricetes|g__Wanchaivirus|s__Wanchaivirus mEp234	Wanchaivirus mEp234	0	1	18	12	0	0	19	0	28	1	0	0	1	0	1	5	0	0	0	0	0	0	0	0	0	0	0	0	0	8	2	6	31	0	1	0	0	0	0	0	0	0	0	0	4	1	0	0
d__Viruses|k__Heunggongvirae|p__Uroviricota|c__Caudoviricetes|f__Straboviridae|g__Jiaodavirus|s__Jiaodavirus kpv477	Jiaodavirus kpv477	0	0	0	0	0	0	3	1	0	0	0	0	0	2	0	0	0	0	0	1	0	0	2	0	0	0	1	0	0	0	0	2	0	0	0	0	0	0	0	0	0	0	0	0	0	0	0	0
d__Viruses|k__Heunggongvirae|p__Uroviricota|c__Caudoviricetes|g__Traversvirus|s__Traversvirus tv86	Traversvirus tv86	0	237	7	35	363	0	351	24	324	11	0	69	97	0	2	102	50	278	10	2	0	12	0	213	21	6	165	126	0	8	590	307	462	431	33	84	38	19	91	188	50	2	0	1371	92	17	0	0
d__Viruses|k__Heunggongvirae|p__Uroviricota|c__Caudoviricetes|f__Autographiviridae|g__Cheungvirus|s__Cheungvirus NATL1A7	Cheungvirus NATL1A7	61	40	381	1	22	20	103	2	25	6	0	33	5	4	1	25	0	0	0	0	1	6	2	13	18	13	92	10	7	4	3	90	17	5	0	2	7	0	0	0	15	0	3	109	11	0	0	1
d__Viruses|k__Heunggongvirae|p__Uroviricota|c__Caudoviricetes|g__Polybotosvirus|s__Polybotosvirus Atuph07	Polybotosvirus Atuph07	0	4	5	3	3	7	0	0	12	10	11	4	6	13	27	14	5	5	6	1	14	9	3	24	2	1	3	2	10	2	1	12	4	0	13	4	9	8	4	14	8	21	2	4	1	2	0	1
d__Viruses|k__Heunggongvirae|p__Uroviricota|c__Caudoviricetes|g__Omarvirus|s__Omarvirus omar	Omarvirus omar	16	0	16	0	0	33	5	3	2	8	0	0	27	10	0	0	2	3	2	0	0	10	21	2	612	1	2	0	2	5	2	4	4	5	0	2	1	0	6	1	0	0	3	4	1	2	4	0
d__Viruses|k__Heunggongvirae|p__Uroviricota|c__Caudoviricetes|f__Peduoviridae|g__Novemvirus|s__Novemvirus T5282H	Novemvirus T5282H	1	0	0	0	0	0	0	0	1	0	1	0	1	0	0	0	0	0	0	0	0	0	5	0	0	0	0	0	0	0	1	1	0	0	0	0	0	0	0	1	0	0	0	0	0	0	0	0
d__Viruses|k__Heunggongvirae|p__Uroviricota|c__Caudoviricetes|g__Kagunavirus|s__Kagunavirus golestan	Kagunavirus golestan	0	0	0	0	0	0	0	0	0	0	0	0	0	0	0	0	0	0	0	0	0	0	0	0	0	0	0	0	0	0	0	0	0	0	0	0	0	0	0	0	0	0	0	0	0	0	0	0
d__Viruses|k__Heunggongvirae|p__Uroviricota|c__Caudoviricetes|f__Kyanoviridae|g__Shandvirus|s__Shandvirus sh35	Shandvirus sh35	0	1	0	0	0	1	0	0	2	0	5	0	4	40	15	10	7	6	3	6	10	14	16	0	0	0	0	0	0	3	1	0	6	0	0	5	4	6	34	71	2	6	4	5	1	8	7	0
d__Viruses|k__Heunggongvirae|p__Uroviricota|c__Caudoviricetes|g__Kagunavirus|s__Kagunavirus K1ind2	Kagunavirus K1ind2	0	0	0	0	0	0	0	0	0	0	0	0	0	0	0	0	0	0	0	0	0	0	0	0	0	0	0	0	0	0	0	0	0	0	0	0	0	0	0	0	0	0	0	0	0	0	0	0
d__Viruses|k__Heunggongvirae|p__Uroviricota|c__Caudoviricetes|f__Straboviridae|g__Roskildevirus|s__Roskildevirus cronus	Roskildevirus cronus	0	2	0	0	0	0	1	0	0	2	5	1	9	14	7	58	1	5	20	6	10	10	18	2	0	0	0	0	0	0	1	1	0	0	0	12	11	19	3	0	1	25	2	15	126	3	5	0
d__Viruses|k__Heunggongvirae|p__Uroviricota|c__Caudoviricetes|g__Kagunavirus|s__Kagunavirus K1G	Kagunavirus K1G	0	0	0	0	0	0	0	0	0	0	0	0	0	0	0	0	0	0	0	0	0	0	0	0	0	0	0	0	0	0	0	0	0	0	0	0	0	0	0	0	0	0	0	0	0	0	0	0
d__Viruses|k__Heunggongvirae|p__Uroviricota|c__Caudoviricetes|g__Kagunavirus|s__Kagunavirus K1ind1	Kagunavirus K1ind1	0	0	0	0	0	0	0	0	0	0	0	0	0	0	0	0	0	0	0	0	0	0	0	0	0	0	0	1	0	0	0	0	0	0	1	0	0	0	0	0	0	0	0	0	0	0	0	0
d__Viruses|k__Heunggongvirae|p__Uroviricota|c__Caudoviricetes|g__Kagunavirus|s__Kagunavirus RP180	Kagunavirus RP180	0	0	0	0	0	0	0	0	0	0	0	0	0	1	0	0	0	0	0	0	0	0	0	0	0	0	0	0	0	0	0	0	0	0	0	0	0	0	0	0	0	0	0	0	0	0	0	0
d__Viruses|k__Heunggongvirae|p__Uroviricota|c__Caudoviricetes|g__Lafunavirus|s__Lafunavirus LF1	Lafunavirus LF1	0	50	19	12	0	42	2	0	29	132	0	32	90	0	0	0	5	1	0	0	0	8	0	6	0	0	0	0	0	6	0	3	0	0	5	0	0	0	2	0	0	0	0	27	91	0	0	2
d__Viruses|k__Heunggongvirae|p__Uroviricota|c__Caudoviricetes|f__Demerecviridae|g__Vipunavirus|s__Vipunavirus pVp1	Vipunavirus pVp1	0	5	12	3	12	0	14	0	25	7	0	5	5	0	0	5	8	4	0	2	0	4	0	4	23	0	20	6	0	2	18	23	25	28	0	4	2	1	1	12	1	0	0	32	4	1	0	0
d__Viruses|k__Heunggongvirae|p__Uroviricota|c__Caudoviricetes|g__Phifelvirus|s__Phifelvirus FL1	Phifelvirus FL1	0	1	0	0	11	37	2	0	5	0	0	0	1	0	0	0	0	0	0	0	0	0	0	0	0	0	18	0	0	0	0	7	0	0	0	0	0	0	0	0	0	0	0	0	0	0	0	0
d__Viruses|k__Heunggongvirae|p__Uroviricota|c__Caudoviricetes|g__Petsuvirus|s__Kosakonia phage Kc263	Kosakonia phage Kc263	1	1	14	2	13	1	0	3	22	0	0	4	1	0	0	7	8	2	0	1	0	3	0	1	26	0	4	0	6	3	0	17	0	41	0	5	3	0	1	20	1	0	2	0	1	1	0	2
d__Viruses|k__Heunggongvirae|p__Uroviricota|c__Caudoviricetes|s__Clostridium phage phiCT9441A	Clostridium phage phiCT9441A	0	0	0	0	0	0	0	0	0	0	0	0	0	0	0	0	0	0	0	0	0	0	0	1	179	0	0	0	0	1	0	0	2	0	0	0	0	0	0	0	0	0	0	0	0	0	1	0
d__Viruses|k__Heunggongvirae|p__Uroviricota|c__Caudoviricetes|g__Uetakevirus|s__Uetakevirus epsilon15	Uetakevirus epsilon15	108	1	0	0	65	44	0	1	0	3	0	0	0	0	0	0	0	0	0	0	0	0	0	0	2	0	4	2	4	0	0	0	0	2	0	1	0	0	0	0	1	0	0	0	0	2	0	0
d__Viruses|k__Heunggongvirae|p__Uroviricota|c__Caudoviricetes|g__Bantamvirus|s__Gordonia phage Mollymur	Gordonia phage Mollymur	0	12	0	3	24	16	19	0	0	26	0	22	8	0	16	0	4	15	0	0	1	0	0	6	0	0	49	0	0	1	8	7	13	0	0	1	12	0	3	5	8	1	2	0	0	2	0	1
d__Viruses|k__Heunggongvirae|p__Uroviricota|c__Caudoviricetes|g__Attisvirus|s__Gordonia phage Pickett	Gordonia phage Pickett	0	12	0	0	0	9	0	0	19	4	0	0	2	0	0	22	1	3	0	0	0	0	0	20	0	0	187	82	169	0	0	5	46	0	204	13	4	0	0	0	0	0	0	22	10	0	0	0
d__Viruses|k__Sangervirae|p__Phixviricota|c__Malgrandaviricetes|o__Petitvirales|f__Microviridae|s__Parabacteroides phage YZ-2015b	Parabacteroides phage YZ-2015b	0	96	0	0	0	0	0	0	0	0	0	0	113	85	0	0	0	0	0	0	0	1	0	0	0	0	0	0	0	0	0	0	0	0	0	0	0	0	0	0	0	0	0	0	0	0	0	0
d__Viruses|k__Heunggongvirae|p__Uroviricota|c__Caudoviricetes|s__Salmonella phage vB_SosS_Oslo	Salmonella phage vB_SosS_Oslo	21	1	1	0	20	0	34	1	66	2	0	0	0	0	0	0	0	0	0	1	0	2	0	6	10	0	1	1	35	0	74	0	75	2	1	0	0	0	8	5	0	0	0	0	0	0	0	0
d__Viruses|k__Heunggongvirae|p__Uroviricota|c__Caudoviricetes|g__Harrisonburgvirus|s__Pseudomonas phage PPpW-3	Pseudomonas phage PPpW-3	35	15	228	0	10	6	54	2	16	3	0	18	3	3	2	7	0	2	0	0	0	2	3	0	10	1	53	4	4	3	3	59	4	2	1	2	2	1	1	1	13	0	4	59	3	0	0	0
d__Viruses|k__Heunggongvirae|p__Uroviricota|c__Caudoviricetes|f__Peduoviridae|g__Eganvirus|s__Eganvirus SEN1	Eganvirus SEN1	0	0	0	0	0	0	0	0	0	55	0	0	0	0	0	0	0	0	0	0	0	0	0	0	0	0	0	0	2	0	0	0	0	0	0	0	0	0	0	0	0	0	0	0	0	2	0	0
d__Viruses|k__Heunggongvirae|p__Uroviricota|c__Caudoviricetes|g__Byrnievirus|s__Byrnievirus HK97	Byrnievirus HK97	0	6	17	1	7	0	84	0	43	3	0	4	3	0	0	5	6	0	2	4	0	0	2	4	41	0	0	0	11	22	76	84	144	115	3	4	1	2	2	37	2	0	2	0	1	10	0	0
d__Viruses|k__Heunggongvirae|p__Uroviricota|c__Caudoviricetes|f__Drexlerviridae|g__Rtpvirus|s__Rtpvirus Rtp	Rtpvirus Rtp	0	8	4	2	2	0	22	1	16	6	0	3	3	0	0	8	9	5	1	1	0	1	0	0	7	0	5	4	0	4	29	9	23	35	0	3	4	0	2	4	0	0	1	36	1	4	0	0
d__Viruses|k__Heunggongvirae|p__Uroviricota|c__Caudoviricetes|s__Enterobacteria phage ES18	Enterobacteria phage ES18	0	0	0	0	39	6	0	0	54	3	0	0	0	0	0	0	0	0	0	3	0	0	0	0	0	0	0	1	1	0	3	0	0	4	0	0	0	0	2	1	0	0	0	0	0	1	0	0
d__Viruses|k__Heunggongvirae|p__Uroviricota|c__Caudoviricetes|g__Jerseyvirus|s__Jerseyvirus SE2	Jerseyvirus SE2	0	1	0	0	0	90	0	0	5	0	0	0	0	0	0	0	0	0	0	1	0	0	0	0	0	0	0	0	0	0	0	0	0	0	0	0	0	0	0	0	0	1	0	0	0	0	0	0
d__Viruses|k__Heunggongvirae|p__Uroviricota|c__Caudoviricetes|g__Mieseafarmvirus|s__Mieseafarmvirus RSL1	Mieseafarmvirus RSL1	31	17	14	3	15	4	26	1	32	8	6	1	20	2	0	19	10	3	2	3	0	11	0	5	38	0	27	21	41	4	45	29	44	51	3	12	2	1	3	23	7	1	0	61	5	3	2	3
d__Viruses|k__Heunggongvirae|p__Uroviricota|c__Caudoviricetes|f__Peduoviridae|g__Gegevirus|s__Gegevirus ST437OXA245phi41	Gegevirus ST437OXA245phi41	468	1	0	0	6	153	0	2	114	3	0	2	0	0	0	33	3	5	0	1	0	0	0	9	45	0	0	0	1231	12	0	2	2	62	0	0	5	0	1	0	0	12	1	25	0	10	0	0
d__Viruses|k__Heunggongvirae|p__Uroviricota|c__Caudoviricetes|s__Clostridium phage phiCT453A	Clostridium phage phiCT453A	1	0	0	0	0	0	0	3	5	1	0	1	0	0	0	0	0	0	0	0	0	0	0	1	122	1	0	0	0	2	0	0	1	0	0	0	0	0	0	0	0	0	0	0	0	0	0	0
d__Viruses|k__Heunggongvirae|p__Uroviricota|c__Caudoviricetes|f__Peduoviridae|g__Felsduovirus|s__Felsduovirus RE2010	Felsduovirus RE2010	0	7	0	0	0	0	0	0	129	0	0	3	0	0	0	0	52	1	0	19	0	0	0	11	19	3	0	0	13	32	0	21	1	0	0	15	12	6	0	0	7	0	0	288	1	0	0	0
d__Viruses|k__Heunggongvirae|p__Uroviricota|c__Caudoviricetes|f__Chaseviridae|g__Sabourvirus|s__Sabourvirus sv4HA13	Sabourvirus sv4HA13	0	26	13	0	19	0	0	3	12	3	0	5	15	1	0	3	7	0	0	0	0	2	0	0	20	1	27	24	0	1	36	3	0	0	0	0	1	0	0	2	2	0	0	0	4	2	0	0
d__Viruses|k__Heunggongvirae|p__Uroviricota|c__Caudoviricetes|f__Peduoviridae|g__Xuanwuvirus|s__Xuanwuvirus P88	Xuanwuvirus P88	0	8	0	12	11	0	46	15	991	99	0	241	14	0	0	233	0	0	0	20	0	31	2	187	11	31	25	20	0	14	1609	20	85	0	3	9	72	34	126	191	36	3	0	64	210	1	0	0
d__Viruses|k__Heunggongvirae|p__Uroviricota|c__Caudoviricetes|o__Crassvirales|f__Intestiviridae|g__Carjivirus|s__Carjivirus communis	Carjivirus communis	0	3	0	0	0	0	2	0	0	0	0	1	0	1	0	0	0	3350	5499	1564	0	213	0	0	0	0	0	0	0	0	0	0	0	0	0	0	0	0	0	25958	2	0	0	0	0	0	0	0
d__Viruses|k__Heunggongvirae|p__Uroviricota|c__Caudoviricetes|g__Kagunavirus|s__Kagunavirus K1H	Kagunavirus K1H	0	0	0	0	0	0	0	0	0	0	0	0	0	0	0	0	0	0	0	0	0	0	0	0	0	0	0	0	0	0	0	0	0	0	0	1	0	0	0	0	0	0	0	0	0	0	0	0
d__Viruses|k__Heunggongvirae|p__Uroviricota|c__Caudoviricetes|g__Wongtaivirus|s__Wongtaivirus ECP1	Wongtaivirus ECP1	0	1	0	0	144	0	0	0	0	1	0	0	0	0	0	0	19	0	1	7	0	0	1	0	1	0	6	0	6	3	2	1	0	2	6	0	0	0	2	2	0	0	0	98	0	3	0	0
d__Viruses|k__Heunggongvirae|p__Uroviricota|c__Caudoviricetes|g__Oslovirus|s__Oslovirus ov191	Oslovirus ov191	0	26	0	1	8	0	175	10	35	0	0	11	1	0	0	16	46	33	1	0	0	0	0	10	31	0	19	33	0	5	2	35	259	46	0	9	2	1	5	12	2	0	0	285	15	4	0	0
d__Viruses|k__Heunggongvirae|p__Uroviricota|c__Caudoviricetes|g__Traversvirus|s__Traversvirus F451	Traversvirus F451	0	55	0	0	773	0	109	2	30	8	0	48	13	0	0	32	46	57	3	3	1	1	0	12	32	0	4	1	48	12	32	36	192	45	0	13	0	1	5	17	12	0	0	1	9	0	0	0
d__Viruses|k__Heunggongvirae|p__Uroviricota|c__Caudoviricetes|f__Peduoviridae|g__Peduovirus|s__Peduovirus pv12474III	Peduovirus pv12474III	0	3	0	0	0	0	0	0	103	20	0	2	0	0	0	12	0	14	0	5	0	0	0	0	78	0	0	0	1	7	0	3	0	0	0	1	15	4	6	0	0	0	0	0	20	1	0	0
d__Viruses|k__Heunggongvirae|p__Uroviricota|c__Caudoviricetes|f__Peduoviridae|g__Elveevirus|s__Elveevirus 4LV2017	Elveevirus 4LV2017	29	94	11	4	22	6	29	11	580	12	0	122	16	0	2	20	472	7	0	56	0	0	0	7	133	1	19	16	50	323	33	126	92	57	3	51	50	16	6	25	23	2	0	2344	1	3	0	0
d__Viruses|k__Heunggongvirae|p__Uroviricota|c__Caudoviricetes|g__Jerseyvirus|s__Jerseyvirus jersey	Jerseyvirus jersey	0	1	0	0	0	0	0	0	0	0	0	0	0	0	0	0	0	0	0	0	0	0	0	0	0	0	0	0	0	0	0	0	0	0	0	0	0	0	0	0	0	0	0	0	0	0	0	0
d__Viruses|k__Heunggongvirae|p__Uroviricota|c__Caudoviricetes|s__Enterococcus phage phiEf11	Enterococcus phage phiEf11	0	113	0	0	45	22	0	0	4	0	0	0	9	0	0	3	0	0	0	0	0	0	0	19	0	0	12	0	0	0	7	8	5	0	2	0	0	0	0	0	0	0	0	0	1	0	0	0
d__Viruses|k__Heunggongvirae|p__Uroviricota|c__Caudoviricetes|s__Salmonella phage 118970_sal3	Salmonella phage 118970_sal3	0	7	53	4	0	11	104	0	9	3	0	10	0	1	1	12	0	0	0	15	0	13	0	0	38	0	0	0	25	2	271	62	170	57	0	8	0	1	0	11	0	0	0	0	0	3	0	0
d__Viruses|k__Heunggongvirae|p__Uroviricota|c__Caudoviricetes|f__Peduoviridae|g__Felsduovirus|s__Felsduovirus SEN8	Felsduovirus SEN8	0	9	0	0	1	0	0	0	88	0	0	13	2	0	0	4	18	1	0	2	0	0	0	26	12	0	0	0	98	33	0	8	3	0	0	3	6	1	0	1	1	0	0	127	0	0	0	0
d__Viruses|k__Heunggongvirae|p__Uroviricota|c__Caudoviricetes|s__Streptococcus phage 5093	Streptococcus phage 5093	15	29	10	9	39	1	13	2	18	4	1	3	2	0	1	4	6	2	0	0	1	2	0	29	0	3	6	0	0	25	3	60	9	0	8	1	1	0	0	3	6	0	0	14	1	0	3	0
d__Viruses|k__Heunggongvirae|p__Uroviricota|c__Caudoviricetes|f__Kyanoviridae|g__Sokavirus|s__Synechococcus phage S-SZBM1	Synechococcus phage S-SZBM1	122	47	632	3	31	123	179	7	51	21	12	81	11	9	4	57	8	14	1	2	5	5	8	18	59	36	188	29	24	18	16	259	26	14	18	20	5	12	3	10	49	4	17	230	79	0	2	1
d__Viruses|k__Heunggongvirae|p__Uroviricota|c__Caudoviricetes|g__Jerseyvirus|s__Salmonella phage CTH7	Salmonella phage CTH7	0	0	0	0	0	0	0	0	0	0	0	0	0	0	0	0	0	0	0	0	0	0	0	0	0	0	0	0	0	0	0	0	0	0	0	0	0	0	0	0	0	0	0	0	0	0	0	0
d__Viruses|k__Heunggongvirae|p__Uroviricota|c__Caudoviricetes|f__Salasmaviridae|g__Cepunavirus|s__Cepunavirus Cp1	Cepunavirus Cp1	0	0	0	46	0	8	0	0	0	7	0	0	0	1	0	0	0	0	0	0	0	0	0	0	0	0	15	0	127	7	0	0	0	0	0	0	0	0	0	0	2	0	4	0	0	0	0	0
d__Viruses|k__Heunggongvirae|p__Uroviricota|c__Caudoviricetes|g__Glaedevirus|s__Glaedevirus gv2H10	Glaedevirus gv2H10	0	907	621	47	212	0	1586	24	1457	102	0	164	608	1	4	382	38	356	10	131	4	36	3	452	272	5	238	209	0	293	633	1615	2450	2021	25	221	163	25	245	949	52	4	10	549	40	31	0	0
d__Viruses|k__Heunggongvirae|p__Uroviricota|c__Caudoviricetes|g__Gofduovirus|s__Gofduovirus GF2	Gofduovirus GF2	10	4	1	1	3	0	0	0	2	0	0	2	3	0	0	1	3	2	0	2	0	0	0	0	10	0	3	0	7	0	0	1	2	7	0	3	1	0	0	0	0	0	0	17	0	0	0	0
d__Viruses|k__Heunggongvirae|p__Uroviricota|c__Caudoviricetes|s__Flyfo siphovirus Tbat1_6	Flyfo siphovirus Tbat1_6	0	0	0	0	0	62	0	0	2	0	0	0	0	0	0	4	0	0	0	0	0	0	0	0	0	0	0	0	59	0	0	0	0	6	0	0	0	0	0	0	0	0	0	0	0	0	0	0
d__Viruses|k__Heunggongvirae|p__Uroviricota|c__Caudoviricetes|g__Larmunavirus|s__Larmunavirus Lrm1	Larmunavirus Lrm1	0	0	0	10	2	7	0	4	42	0	0	0	0	2	0	0	0	0	0	0	0	0	0	0	0	0	0	0	0	23	0	4	16	0	6	0	0	0	0	4	0	7	0	0	127	0	0	0
d__Viruses|k__Heunggongvirae|p__Uroviricota|c__Caudoviricetes|s__Salmonella phage SPN3UB	Salmonella phage SPN3UB	0	0	0	0	163	0	19	5	15	8	0	6	0	0	0	1	2	0	0	1	0	2	0	3	25	0	33	21	78	0	21	6	34	8	3	6	1	0	1	0	0	0	0	14	0	1	0	0
d__Viruses|k__Heunggongvirae|p__Uroviricota|c__Caudoviricetes|f__Peduoviridae|g__Peduovirus|s__Peduovirus Wphi	Peduovirus Wphi	0	0	0	0	0	0	0	1	31	19	0	1	0	0	0	8	0	4	0	3	0	0	0	6	103	0	0	0	0	8	0	11	0	0	0	2	0	1	3	0	0	0	0	0	0	0	0	0
d__Viruses|k__Heunggongvirae|p__Uroviricota|c__Caudoviricetes|g__Brussowvirus|s__Streptococcus phage TP-778L	Streptococcus phage TP-778L	2	6	0	4	2	2	0	0	0	0	0	0	3	0	0	3	1	0	0	0	0	2	0	0	0	0	0	0	0	0	0	44	2	0	0	0	1	0	0	0	0	0	1	0	0	0	0	0
d__Viruses|k__Heunggongvirae|p__Uroviricota|c__Caudoviricetes|o__Crassvirales|f__Suoliviridae|g__Culoivirus|s__Culoivirus americanus	Culoivirus americanus	0	24	0	0	0	0	0	0	0	0	0	0	27	9	26	0	0	0	0	0	0	1	0	0	0	0	0	0	0	0	1	0	0	0	0	0	0	0	0	0	0	1	2	0	0	1	0	0
d__Viruses|k__Heunggongvirae|p__Uroviricota|c__Caudoviricetes|s__Bacteroides phage B124-14	Bacteroides phage B124-14	0	42	0	0	0	0	0	794	0	0	30	0	0	5	25	0	0	36	0	15	0	13	40	85	0	0	0	0	0	0	0	0	0	8	0	1	97	50	25	23	12	2479	0	0	0	0	0	1
d__Viruses|k__Heunggongvirae|p__Uroviricota|c__Caudoviricetes|f__Peduoviridae|g__Reginaelenavirus|s__Reginaelenavirus rv3LV2017	Reginaelenavirus rv3LV2017	6	0	0	0	0	0	1	12	9	2	0	0	0	0	0	0	0	0	0	0	0	0	0	3	0	0	0	0	0	0	4	33	0	0	0	0	0	0	1	0	0	0	0	0	0	0	0	0
d__Viruses|k__Heunggongvirae|p__Uroviricota|c__Caudoviricetes|o__Crassvirales|f__Intestiviridae|g__Carjivirus|s__Carjivirus hominis	Carjivirus hominis	0	1	0	0	0	0	0	1	0	0	0	0	0	0	0	0	1	824	1535	375	0	31	0	0	0	0	0	0	0	0	0	0	0	0	0	0	0	0	0	9377	0	1	0	0	0	0	0	0
d__Viruses|k__Heunggongvirae|p__Uroviricota|c__Caudoviricetes|g__Behunavirus|s__Behunavirus BH1	Behunavirus BH1	0	0	0	11	0	0	0	0	12	0	0	0	0	0	0	0	0	0	0	0	0	0	1	0	0	0	0	0	0	7	0	9	13	0	4	1	0	0	0	0	0	0	0	0	17	0	0	1
d__Viruses|k__Heunggongvirae|p__Uroviricota|c__Caudoviricetes|o__Crassvirales|f__Suoliviridae|g__Cacepaovirus|s__Cacepaovirus simiae	Cacepaovirus simiae	1	0	4	0	1	0	3	1	0	0	3	5	7	15	0	0	0	0	0	4	0	4	4	0	0	0	0	0	0	0	1	0	0	0	2	0	1	0	14	2	3	0	6	0	1	0	0	10
d__Viruses|k__Heunggongvirae|p__Uroviricota|c__Caudoviricetes|g__Ravinvirus|s__Ravinvirus N15	Ravinvirus N15	0	7	0	0	0	0	0	0	4	0	0	38	16	0	0	89	0	0	0	0	0	0	0	25	2	0	10	8	0	0	0	0	0	1	0	0	0	5	36	0	0	0	0	0	0	0	0	0
d__Viruses|k__Heunggongvirae|p__Uroviricota|c__Caudoviricetes|f__Peduoviridae|g__Vimunumvirus|s__Vimunumvirus ST147VIM1phi71	Vimunumvirus ST147VIM1phi71	220	56	42	11	51	118	72	16	104	33	0	18	36	0	0	60	23	21	0	8	1	5	0	14	82	0	68	55	221	23	91	100	93	171	6	17	9	5	5	41	2	7	1	95	38	36	1	0
d__Viruses|k__Heunggongvirae|p__Uroviricota|c__Caudoviricetes|g__Seoulvirus|s__Seoulvirus SPN3US	Seoulvirus SPN3US	23	78	6	7	32	13	7	6	21	16	0	4	6	2	4	10	1	6	0	0	4	0	0	3	0	46	30	15	34	81	4	9	5	0	49	1	9	3	4	3	11	1	1	12	7	3	1	0
d__Viruses|k__Heunggongvirae|p__Uroviricota|c__Caudoviricetes|f__Peduoviridae|g__Reipivirus|s__Reipivirus ST16OXA48phi54	Reipivirus ST16OXA48phi54	4994	0	0	0	0	86	0	0	14	0	0	4	0	0	0	21	0	0	0	0	0	0	0	2	4	0	0	0	231	0	0	58	15	14	0	0	0	0	0	0	0	1	0	0	0	4	0	0
d__Viruses|k__Heunggongvirae|p__Uroviricota|c__Caudoviricetes|g__Armstrongvirus|s__Armstrongvirus armstrong	Armstrongvirus armstrong	0	1	0	4	14	5	3	10	0	1	0	0	0	0	12	0	0	2	0	0	1	0	1	1	0	0	283	0	0	0	1	6	3	0	0	4	0	0	0	0	3	0	0	9	8	0	5	0
d__Viruses|k__Heunggongvirae|p__Uroviricota|c__Caudoviricetes|s__Klebsiella phage VLCpiS13a	Klebsiella phage VLCpiS13a	0	0	0	0	0	0	0	0	0	0	0	0	0	0	0	0	0	0	0	0	0	0	0	0	0	0	0	0	0	0	0	1	0	0	0	1	0	0	0	0	0	0	0	0	0	0	0	0
d__Viruses|k__Heunggongvirae|p__Uroviricota|c__Caudoviricetes|g__Oslovirus|s__Oslovirus ArgO145	Oslovirus ArgO145	0	111	0	0	134	0	284	147	64	59	0	123	117	0	0	12	7	1	2	1	0	19	0	24	80	4	214	173	0	79	527	51	548	477	3	9	14	8	6	55	8	0	0	1	8	5	0	0
d__Viruses|k__Heunggongvirae|p__Uroviricota|c__Caudoviricetes|s__Pectobacterium phage ZF40	Pectobacterium phage ZF40	6	3	2	0	5	3	9	5	15	3	0	1	4	0	0	9	3	1	1	2	0	0	0	2	16	0	8	8	60	0	10	15	10	16	0	6	2	0	0	6	2	2	0	11	4	3	0	0
d__Viruses|k__Heunggongvirae|p__Uroviricota|c__Caudoviricetes|s__Hafnia phage yong1	Hafnia phage yong1	0	13	0	1	0	0	0	0	1	36	0	9	1	0	3	0	0	0	1	0	0	0	0	0	64	0	27	15	0	0	42	6	0	0	11	2	1	0	0	3	2	0	1	0	0	10	0	0
d__Viruses|k__Heunggongvirae|p__Uroviricota|c__Caudoviricetes|o__Crassvirales|f__Intestiviridae|g__Drivevirus|s__Drivevirus gastrointestinalis	Drivevirus gastrointestinalis	0	0	0	0	0	0	0	0	0	0	0	0	0	0	0	0	0	0	0	0	0	0	0	0	0	1	1	0	0	1	0	0	0	19	0	0	1	0	0	0	0	0	0	0	0	0	0	0
d__Viruses|k__Heunggongvirae|p__Uroviricota|c__Caudoviricetes|f__Straboviridae|g__Pseudotevenvirus|s__Pseudotevenvirus gap161	Pseudotevenvirus gap161	0	0	0	0	0	0	0	0	1	0	0	0	1	0	0	0	0	0	0	0	0	0	0	0	0	0	0	0	0	0	0	0	0	0	0	0	0	0	0	0	0	449	0	0	0	0	0	0
d__Viruses|k__Heunggongvirae|p__Uroviricota|c__Caudoviricetes|f__Ackermannviridae|g__Taipeivirus|s__Taipeivirus menlow	Taipeivirus menlow	0	0	0	0	0	0	0	0	0	0	0	0	0	0	0	0	0	0	0	0	0	0	0	0	0	0	0	0	0	0	0	0	0	0	0	0	0	0	0	0	0	0	0	0	0	0	0	0
d__Viruses|k__Heunggongvirae|p__Uroviricota|c__Caudoviricetes|s__Escherichia phage D6	Escherichia phage D6	117	309	260	71	207	23	357	82	527	131	0	149	199	2	4	279	189	91	6	40	9	25	4	137	463	10	411	333	147	84	469	460	587	813	30	125	66	18	75	277	41	1	6	719	76	27	1	0
d__Viruses|k__Heunggongvirae|p__Uroviricota|c__Caudoviricetes|s__Shigella phage SfII	Shigella phage SfII	17	83	290	49	49	0	258	1	94	7	0	91	0	0	0	70	0	4	1	99	3	44	0	12	263	0	3	0	0	25	1160	276	523	225	24	15	1	7	1	201	6	0	5	0	4	37	0	0
d__Viruses|k__Heunggongvirae|p__Uroviricota|c__Caudoviricetes|f__Drexlerviridae|g__Webervirus|s__Webervirus shelby	Webervirus shelby	0	0	0	0	0	0	0	0	0	0	0	0	0	0	0	0	0	0	0	0	0	0	0	0	0	0	0	0	0	0	0	0	0	0	0	0	0	0	0	0	0	0	0	0	0	414	0	0
d__Viruses|k__Heunggongvirae|p__Uroviricota|c__Caudoviricetes|f__Kyanoviridae|g__Anaposvirus|s__Anaposvirus socalone	Anaposvirus socalone	0	2	0	2	0	0	0	0	0	0	2	2	8	22	15	0	2	32	3	48	5	69	2	0	0	0	0	1	0	0	0	0	0	0	0	0	11	13	3	3	0	1	13	0	0	35	87	8
d__Viruses|k__Pararnavirae|p__Artverviricota|c__Revtraviricetes|o__Ortervirales|f__Retroviridae|s__Human endogenous retrovirus K	Human endogenous retrovirus K	148	3	13	0	0	4	92	0	0	0	0	378	0	3	0	0	0	2	0	0	0	0	0	0	0	321	6	0	0	0	2	101	162	0	0	21	0	0	0	4	45	0	0	1	0	0	0	0
d__Viruses|k__Heunggongvirae|p__Uroviricota|c__Caudoviricetes|g__Lacnuvirus|s__Lacnuvirus LcNu	Lacnuvirus LcNu	0	0	0	8	3	1	0	4	18	0	0	0	0	0	0	0	0	0	0	0	0	0	0	0	0	0	0	1	0	7	0	0	12	0	6	0	0	0	0	0	0	1	0	0	36	0	0	0
d__Viruses|k__Heunggongvirae|p__Uroviricota|c__Caudoviricetes|g__Lagaffevirus|s__Lagaffevirus lagaffe	Lagaffevirus lagaffe	0	0	0	0	0	0	1	0	0	0	35	0	0	0	0	0	0	0	0	58	0	2	0	0	0	0	0	0	0	0	0	0	0	0	0	0	0	1	144	0	0	0	0	0	0	0	0	4
d__Viruses|k__Heunggongvirae|p__Uroviricota|c__Caudoviricetes|g__Roufvirus|s__Roufvirus pIS4A	Roufvirus pIS4A	20	0	0	0	0	15	0	0	0	0	0	0	0	0	0	0	0	0	0	0	0	0	0	0	0	0	0	0	33	0	0	2	0	3	0	0	0	0	0	0	0	0	0	0	0	0	0	0
d__Viruses|k__Heunggongvirae|p__Uroviricota|c__Caudoviricetes|s__Bacteroides phage B40-8	Bacteroides phage B40-8	0	11	0	0	0	0	0	0	0	0	1	0	0	1	46	0	0	22	0	1	2	0	15	0	0	0	0	0	0	0	0	0	0	3	0	0	165	0	0	4	0	11029	0	0	0	0	0	2
d__Viruses|k__Heunggongvirae|p__Uroviricota|c__Caudoviricetes|f__Peduoviridae|g__Peduovirus|s__Peduovirus P24C9	Peduovirus P24C9	0	0	0	0	0	0	0	1	120	15	0	4	0	0	0	8	0	23	0	0	0	0	0	9	180	4	0	0	0	0	0	2	0	0	1	1	0	17	3	1	0	0	0	2	12	4	0	0
d__Viruses|k__Heunggongvirae|p__Uroviricota|c__Caudoviricetes|s__Streptococcus phage EJ-1	Streptococcus phage EJ-1	370	6	330	2	107	13	41	7	2	4	0	20	2	0	0	6	4	3	0	0	0	0	0	0	4	13	308	19	77	23	2	75	22	10	0	6	2	1	0	2	13	2	0	22	0	0	0	0
d__Viruses|k__Heunggongvirae|p__Uroviricota|c__Caudoviricetes|f__Peduoviridae|g__Kapieceevirus|s__Kapieceevirus ST512KPC3phi132	Kapieceevirus ST512KPC3phi132	0	11	0	0	5	0	0	0	134	0	0	25	0	0	0	0	65	0	0	26	0	0	0	2	28	0	0	0	804	71	0	23	0	0	0	14	12	10	0	0	21	5	0	386	0	2	0	0
d__Viruses|k__Heunggongvirae|p__Uroviricota|c__Caudoviricetes|s__Klebsiella phage vB_KpnS-Carvaje	Klebsiella phage vB_KpnS-Carvaje	0	0	0	1	0	0	0	0	0	0	0	0	0	0	0	0	0	0	0	0	0	1	0	0	0	0	0	0	0	0	0	1	0	0	0	0	0	0	0	0	0	0	0	0	0	2	0	0
d__Viruses|k__Heunggongvirae|p__Uroviricota|c__Caudoviricetes|g__Jerseyvirus|s__Salmonella phage NBSal006	Salmonella phage NBSal006	0	0	0	0	0	0	0	0	3	0	0	0	0	0	0	0	0	0	0	0	0	0	0	0	0	0	0	0	0	0	0	0	0	331	0	44	0	2	0	2	3	0	0	0	0	0	0	0
d__Viruses|k__Heunggongvirae|p__Uroviricota|c__Caudoviricetes|f__Peduoviridae|s__Escherichia phage Cartapus	Escherichia phage Cartapus	0	67	0	2	0	0	17	0	703	6	0	166	15	0	0	7	411	7	0	106	0	2	0	3	127	0	18	14	1	372	0	133	62	0	8	48	44	17	2	1	51	2	0	2205	0	2	0	0
d__Viruses|k__Heunggongvirae|p__Uroviricota|c__Caudoviricetes|g__Uetakevirus|s__Enterobacter phage Tyrion	Enterobacter phage Tyrion	249	0	0	1	56	10	0	24	0	27	0	2	0	0	0	2	0	0	0	0	0	0	0	0	109	0	10	0	11	0	0	0	0	5	0	1	0	0	0	1	1	1	0	0	0	1	1	0
d__Viruses|k__Heunggongvirae|p__Uroviricota|c__Caudoviricetes|o__Crassvirales|f__Intestiviridae|g__Diorhovirus|s__Diorhovirus intestinalis	Diorhovirus intestinalis	1	0	0	0	0	0	0	1	0	0	0	1	0	0	0	0	5	0	0	0	0	0	0	0	0	0	0	0	0	0	0	0	0	0	0	0	0	0	0	0	1	0	0	0	0	0	0	0
d__Viruses|k__Heunggongvirae|p__Uroviricota|c__Caudoviricetes|o__Crassvirales|f__Intestiviridae|g__Jahgtovirus|s__Jahgtovirus gastrointestinalis	Jahgtovirus gastrointestinalis	0	0	0	0	0	0	0	0	0	0	0	0	0	18	0	0	0	0	0	0	0	0	1	0	0	0	0	0	0	0	0	1	0	2323	0	0	0	0	0	0	0	0	0	1	0	1	0	0
d__Viruses|k__Heunggongvirae|p__Uroviricota|c__Caudoviricetes|f__Zierdtviridae|g__Ceetrepovirus|s__Corynebacterium virus Darwin	Corynebacterium virus Darwin	100	79	46	9	54	27	76	14	102	24	0	24	38	0	1	47	46	27	2	11	3	3	1	11	96	2	105	80	119	24	111	116	170	194	7	33	13	3	7	78	2	1	0	162	16	6	2	0
d__Viruses|k__Heunggongvirae|p__Uroviricota|c__Caudoviricetes|g__Phietavirus|s__Phietavirus pv3MRA	Phietavirus pv3MRA	29	0	281	0	0	0	0	0	0	0	0	0	0	0	0	0	0	0	0	0	0	0	0	0	0	1	0	0	0	0	0	0	0	0	0	0	0	0	0	0	0	0	0	0	0	0	0	0
d__Viruses|k__Heunggongvirae|p__Uroviricota|c__Caudoviricetes|g__Brunovirus|s__Brunovirus SEN34	Brunovirus SEN34	71	2	0	2	0	41	0	0	5	118	0	22	13	1	3	3	0	0	0	0	0	0	0	0	284	0	0	4	66	0	19	0	0	88	29	62	0	0	0	0	0	0	1	0	0	44	0	0
d__Viruses|k__Heunggongvirae|p__Uroviricota|c__Caudoviricetes|g__Triavirus|s__Triavirus tp3102	Triavirus tp3102	80	0	754	0	0	4	8	0	0	0	0	0	0	0	0	0	0	0	0	0	0	0	0	0	0	5	0	0	0	0	4	0	0	0	0	0	0	0	0	0	0	0	0	0	0	0	0	0
d__Viruses|k__Heunggongvirae|p__Uroviricota|c__Caudoviricetes|s__Klebsiella phage VLCpiS13b	Klebsiella phage VLCpiS13b	90	0	0	0	0	43	0	0	0	0	0	0	0	0	0	0	0	0	0	0	0	0	0	0	0	0	0	0	9	0	0	0	0	17	0	0	0	0	1	0	0	1	0	0	0	2	2	0
d__Viruses|k__Heunggongvirae|p__Uroviricota|c__Caudoviricetes|g__Pankowvirus|s__Pankowvirus WGPS6	Pankowvirus WGPS6	0	59	13	1	22	0	534	31	238	6	0	41	22	0	0	81	59	12	1	3	0	1	1	49	65	6	3	1	0	41	88	358	882	103	34	20	10	3	27	185	21	2	1	1246	47	10	0	0
d__Viruses|k__Heunggongvirae|p__Uroviricota|c__Caudoviricetes|f__Schitoviridae|s__Rhizobium phage RHph_I1_6	Rhizobium phage RHph_I1_6	54	19	10	0	17	5	30	2	46	16	5	6	18	5	1	13	10	13	1	5	2	0	0	7	43	0	47	38	27	9	48	23	55	62	1	8	4	3	1	25	3	3	4	63	7	2	0	0
d__Viruses|k__Bamfordvirae|p__Preplasmiviricota|c__Tectiliviricetes|o__Rowavirales|f__Adenoviridae|g__Mastadenovirus|s__Human mastadenovirus B	Human mastadenovirus B	0	1	0	0	0	0	0	0	0	0	12	0	0	0	0	0	0	0	0	0	0	0	0	0	0	0	1	0	0	0	0	0	0	0	0	0	0	0	0	0	0	188	0	0	0	0	0	2
d__Viruses|k__Heunggongvirae|p__Uroviricota|c__Caudoviricetes|s__Staphylococcus phage SPbeta-like	Staphylococcus phage SPbeta-like	300	0	237	0	3	21	21	9	1	5	0	2	0	0	0	0	1	0	0	0	0	0	0	2	7	10	45	0	1	1	24	46	4	5	3	0	9	1	0	2	6	1	0	0	2	0	0	0
d__Viruses|k__Heunggongvirae|p__Uroviricota|c__Caudoviricetes|s__Klebsiella phage phiKO2	Klebsiella phage phiKO2	487	0	0	0	4	6	0	0	14	0	0	54	1	0	0	148	0	0	0	0	0	0	0	4	23	0	0	0	220	0	0	0	0	14	0	0	0	2	10	0	0	6	0	0	0	0	0	0
d__Viruses|k__Heunggongvirae|p__Uroviricota|c__Caudoviricetes|g__Aguilavirus|s__Aguilavirus mEp213	Aguilavirus mEp213	0	0	0	0	0	0	39	0	0	14	0	1	1	0	0	0	1	0	3	1	0	2	0	0	3	0	0	0	3	0	58	0	57	2	2	0	0	0	0	3	0	0	2	17	0	3	0	0
d__Viruses|k__Heunggongvirae|p__Uroviricota|c__Caudoviricetes|g__Nesevirus|s__Nesevirus nv2G7b	Nesevirus nv2G7b	0	1127	87	113	389	0	1897	57	435	260	0	841	752	0	13	1189	39	114	21	31	14	53	2	80	485	27	540	441	0	88	1328	1237	3123	2086	184	98	45	63	76	726	31	0	2	712	71	102	0	0
d__Viruses|k__Heunggongvirae|p__Uroviricota|c__Caudoviricetes|g__Sherbrookevirus|s__Sherbrookevirus CD506	Sherbrookevirus CD506	0	0	0	0	0	0	0	0	0	0	0	0	0	1	0	0	0	0	0	0	0	0	0	73	16	0	0	0	0	0	0	0	30	4	0	2	0	0	0	0	0	0	0	0	0	0	0	0
d__Viruses|k__Bamfordvirae|p__Preplasmiviricota|c__Tectiliviricetes|o__Rowavirales|f__Adenoviridae|g__Mastadenovirus|s__Simian mastadenovirus B	Simian mastadenovirus B	0	0	0	0	0	0	0	0	0	0	45	0	0	0	0	0	0	0	1	0	0	0	0	0	0	0	0	0	0	0	0	0	0	0	0	0	0	0	0	0	0	712	0	0	0	0	0	0
d__Viruses|k__Heunggongvirae|p__Uroviricota|c__Caudoviricetes|s__Klebsiella phage VLCpiS13e	Klebsiella phage VLCpiS13e	0	0	0	0	0	14	0	0	1	0	0	0	0	0	0	0	0	0	0	0	2	0	0	1	0	0	0	0	41	0	0	1	0	1	1	0	0	0	0	0	0	0	0	0	0	0	1	0
d__Viruses|k__Heunggongvirae|p__Uroviricota|c__Caudoviricetes|g__Uetakevirus|s__Uetakevirus SPN1S	Uetakevirus SPN1S	69	3	0	0	5	0	0	0	0	0	0	1	0	4	1	5	1	3	1	0	4	6	1	0	22	0	0	0	0	0	2	0	0	0	0	0	0	0	0	4	5	0	5	1	0	0	2	0
d__Viruses|k__Bamfordvirae|p__Preplasmiviricota|c__Tectiliviricetes|o__Rowavirales|f__Adenoviridae|g__Mastadenovirus|s__Simian mastadenovirus I	Simian mastadenovirus I	0	0	0	0	0	0	0	0	0	0	40	0	1	0	0	0	0	0	0	0	0	0	0	0	0	0	0	0	0	0	0	0	0	0	0	0	0	0	0	0	0	425	0	0	0	0	0	0
d__Viruses|k__Heunggongvirae|p__Uroviricota|c__Caudoviricetes|f__Schitoviridae|g__Enquatrovirus|s__Enquatrovirus N4	Enquatrovirus N4	53	35	300	10	19	28	94	1	22	8	0	34	7	1	5	35	3	7	3	1	2	2	12	3	18	26	114	9	16	9	6	112	20	9	7	15	2	3	0	2	22	2	5	150	10	0	0	0
d__Viruses|k__Bamfordvirae|p__Preplasmiviricota|c__Tectiliviricetes|o__Rowavirales|f__Adenoviridae|g__Mastadenovirus|s__Simian mastadenovirus E	Simian mastadenovirus E	0	0	0	0	0	0	0	0	0	0	107	0	1	0	0	0	0	0	0	0	0	0	0	0	0	0	0	0	0	0	0	0	0	0	0	0	0	0	0	0	0	1223	0	0	0	0	0	0
d__Viruses|k__Heunggongvirae|p__Uroviricota|c__Caudoviricetes|o__Crassvirales|f__Intestiviridae|g__Delmidovirus|s__Delmidovirus splanchnicus	Delmidovirus splanchnicus	0	0	0	0	0	0	3	0	0	0	2	0	0	0	0	0	0	12	8	3	0	1	0	0	1	0	0	0	0	0	0	0	0	0	0	0	0	0	0	124	0	0	0	0	0	0	0	0
d__Viruses|k__Heunggongvirae|p__Uroviricota|c__Caudoviricetes|f__Peduoviridae|g__Eganvirus|s__Salmonella phage BIS20	Salmonella phage BIS20	11	1	0	0	0	0	1	0	5	134	0	0	0	0	0	3	0	0	0	0	0	0	0	1	3	0	0	0	2	0	0	2	1	3	0	0	0	0	1	0	0	0	0	0	0	5	0	0
d__Viruses|k__Heunggongvirae|p__Uroviricota|c__Caudoviricetes|g__Oslovirus|s__Oslovirus PA2	Oslovirus PA2	27	167	130	27	116	6	239	52	255	81	0	68	118	0	0	97	96	48	3	17	3	5	0	27	269	5	277	211	33	56	280	270	415	470	28	75	31	10	16	170	20	0	3	397	33	25	0	0
d__Viruses|k__Heunggongvirae|p__Uroviricota|c__Caudoviricetes|g__Likavirus|s__Likavirus nanodon	Likavirus nanodon	0	9	0	9	6	13	31	0	7	24	0	11	5	0	13	30	2	5	0	1	8	2	2	11	0	0	46	19	16	0	11	1	5	0	0	1	11	0	1	1	11	0	0	11	6	4	2	0
d__Viruses|k__Heunggongvirae|p__Uroviricota|c__Caudoviricetes|g__Traversvirus|s__Traversvirus SH2026Stx1	Traversvirus SH2026Stx1	0	6	0	3	253	0	0	9	173	43	0	55	9	0	0	235	24	12	3	72	0	0	2	6	332	1	49	4	0	0	13	34	3	48	0	1	0	8	4	15	41	0	0	147	61	2	0	0
d__Viruses|k__Heunggongvirae|p__Uroviricota|c__Caudoviricetes|f__Peduoviridae|g__Dagavirus|s__Dagavirus ST13OXA48phi121	Dagavirus ST13OXA48phi121	248	4	15	2	5	54	27	1	180	6	0	12	0	0	0	38	13	2	1	6	0	2	0	3	50	0	26	23	965	3	16	15	34	53	2	2	7	0	1	14	3	2	0	75	1	5	2	0
d__Viruses|k__Heunggongvirae|p__Uroviricota|c__Caudoviricetes|g__Peeveelvirus|s__Peeveelvirus SA780ruMSSAST101	Peeveelvirus SA780ruMSSAST101	59	0	565	0	0	1	16	0	0	0	0	0	0	0	0	0	0	0	0	0	0	0	0	0	0	5	0	0	0	0	0	0	0	0	0	0	0	0	0	0	0	0	0	0	0	0	0	0
d__Viruses|k__Heunggongvirae|p__Uroviricota|c__Caudoviricetes|f__Peduoviridae|g__Wadgaonvirus|s__Wadgaonvirus wv5004651	Wadgaonvirus wv5004651	215	1689	1166	231	1183	53	2134	455	2697	597	1	773	1087	0	15	939	1168	506	37	369	4	144	6	363	2745	31	2675	1874	271	1100	3170	2840	3938	6133	238	715	390	98	183	1747	319	7	32	5683	368	187	2	0
d__Viruses|k__Heunggongvirae|p__Uroviricota|c__Caudoviricetes|f__Peduoviridae|g__Gemsvirus|s__Gemsvirus gv5004652	Gemsvirus gv5004652	118	1009	848	267	1071	24	1439	376	2169	626	0	606	662	0	15	775	1075	1294	13	487	7	86	12	600	2520	54	1584	1166	160	382	3194	1696	2458	3458	179	442	560	107	421	1109	248	11	13	5087	320	106	0	0
d__Viruses|k__Heunggongvirae|p__Uroviricota|c__Caudoviricetes|s__Salmonella phage SSU5	Salmonella phage SSU5	1740	0	0	237	0	27	1	0	1	0	0	2	1	0	0	207	1	0	0	0	0	0	0	1	0	0	0	0	2	1	0	3	0	0	97	0	0	0	0	0	0	0	0	4	0	0	0	0
d__Viruses|k__Heunggongvirae|p__Uroviricota|c__Caudoviricetes|f__Peduoviridae|g__Xuanwuvirus|s__Xuanwuvirus P884B11	Xuanwuvirus P884B11	0	49	0	6	0	0	1	7	839	270	0	257	50	0	0	192	0	0	5	8	0	36	5	140	0	19	0	0	0	0	1538	3	15	0	0	8	53	28	48	194	35	4	0	389	196	11	0	0
d__Viruses|k__Heunggongvirae|p__Uroviricota|c__Caudoviricetes|f__Drexlerviridae|g__Webervirus|s__Webervirus PKP126	Webervirus PKP126	0	0	0	0	0	0	0	0	0	0	0	0	0	0	0	0	0	0	0	0	0	0	0	0	3	0	0	0	307	0	0	0	0	0	0	0	0	0	0	0	0	0	0	0	0	80	0	0
d__Viruses|k__Bamfordvirae|p__Preplasmiviricota|c__Tectiliviricetes|o__Rowavirales|f__Adenoviridae|g__Aviadenovirus|s__Fowl aviadenovirus B	Fowl aviadenovirus B	0	0	0	0	0	0	0	0	0	0	20	0	0	0	0	0	0	0	0	0	0	0	0	1	0	0	0	0	0	0	0	0	0	0	0	0	0	0	0	0	0	308	0	0	0	0	0	0
d__Viruses|k__Heunggongvirae|p__Uroviricota|c__Caudoviricetes|f__Ackermannviridae|g__Vapseptimavirus|s__Vapseptimavirus VAP7	Vapseptimavirus VAP7	0	19	1	1	0	0	26	0	2	9	0	5	8	1	0	5	0	0	0	0	0	2	0	0	0	0	33	33	0	0	41	0	39	0	0	3	0	3	0	1	0	0	0	1	0	1	0	0
d__Viruses|k__Heunggongvirae|p__Uroviricota|c__Caudoviricetes|f__Peduoviridae|g__Peduovirus|s__Peduovirus P24B2	Peduovirus P24B2	0	1	0	0	0	0	0	0	25	1	0	1	0	0	0	4	0	14	0	1	0	0	0	0	165	2	0	0	0	15	0	0	0	0	10	0	0	2	0	0	0	0	1	0	4	16	0	0
d__Viruses|k__Heunggongvirae|p__Uroviricota|c__Caudoviricetes|g__Lambdavirus|s__Escherichia virus DE3	Escherichia virus DE3	0	284	226	49	253	140	452	114	529	129	0	108	196	0	3	204	170	96	6	31	3	33	0	72	466	12	497	417	3	109	561	509	614	970	50	141	60	18	41	323	20	6	14	727	68	59	4	0
d__Viruses|k__Heunggongvirae|p__Uroviricota|c__Caudoviricetes|f__Peduoviridae|g__Seongnamvirus|s__Seongnamvirus ESSI2	Seongnamvirus ESSI2	233	0	0	0	0	0	0	0	1	0	0	2	0	0	0	0	0	0	0	0	0	4	0	0	0	0	0	1	0	4	154	0	0	0	0	0	0	0	0	7	0	0	0	0	0	0	0	0
d__Viruses|k__Heunggongvirae|p__Uroviricota|c__Caudoviricetes|o__Crassvirales|f__Intestiviridae|g__Jahgtovirus|s__Jahgtovirus secundus	Jahgtovirus secundus	0	0	0	0	0	0	0	0	0	0	0	2	0	56	0	0	20	10	0	0	0	0	0	0	0	0	0	0	0	0	0	0	0	8478	0	0	64	0	0	0	0	0	0	0	0	1	1	0
d__Viruses|k__Bamfordvirae|p__Preplasmiviricota|c__Tectiliviricetes|o__Rowavirales|f__Adenoviridae|g__Mastadenovirus|s__Simian mastadenovirus C	Simian mastadenovirus C	0	0	0	0	0	0	0	0	0	0	68	0	1	0	0	0	0	0	0	0	0	0	0	1	0	0	0	0	0	0	0	0	0	0	0	0	0	0	0	0	0	776	0	0	0	0	0	0
d__Viruses|k__Bamfordvirae|p__Preplasmiviricota|c__Tectiliviricetes|o__Rowavirales|f__Adenoviridae|g__Mastadenovirus|s__Human mastadenovirus G	Human mastadenovirus G	0	0	0	0	0	0	0	0	0	0	28	0	1	0	0	0	0	0	0	0	0	0	0	0	0	0	0	0	0	1	0	0	0	0	0	0	0	0	0	0	0	456	0	0	0	0	0	0
d__Viruses|k__Heunggongvirae|p__Uroviricota|c__Caudoviricetes|s__Shigella phage SfIV	Shigella phage SfIV	65	274	1228	125	634	99	1170	77	675	14	1	365	70	0	3	359	38	54	10	88	2	93	9	186	715	2	427	370	16	24	2704	455	2225	4372	74	71	74	37	7	357	211	3	36	286	38	166	2	1
d__Viruses|k__Heunggongvirae|p__Uroviricota|c__Caudoviricetes|o__Crassvirales|f__Steigviridae|g__Kahnovirus|s__Kahnovirus copri	Kahnovirus copri	0	0	0	0	0	0	2	0	0	0	0	0	7	4120	0	0	0	0	0	0	0	0	1	0	0	0	1	0	0	0	0	0	1	0	0	0	0	0	0	0	0	0	15	0	0	0	0	8856
d__Viruses|k__Bamfordvirae|p__Preplasmiviricota|c__Tectiliviricetes|o__Rowavirales|f__Adenoviridae|g__Mastadenovirus|s__Simian mastadenovirus H	Simian mastadenovirus H	0	2	0	0	0	0	0	0	0	0	26	0	0	0	0	0	0	0	0	0	0	1	0	0	0	0	0	0	0	0	0	0	0	0	0	0	0	0	0	0	0	302	0	0	0	0	0	0
d__Viruses|k__Heunggongvirae|p__Uroviricota|c__Caudoviricetes|f__Peduoviridae|g__Peduovirus|s__Yersinia phage HQ103	Yersinia phage HQ103	0	0	0	0	0	0	0	0	76	6	0	5	0	0	0	13	0	6	0	10	0	0	0	4	3	0	0	0	0	6	0	3	0	0	2	4	0	5	3	0	0	0	1	0	14	1	0	0
d__Viruses|k__Heunggongvirae|p__Uroviricota|c__Caudoviricetes|f__Peduoviridae|g__Xuanwuvirus|s__Xuanwuvirus xv520873	Xuanwuvirus xv520873	14	115	108	24	119	4	200	40	315	83	0	82	87	0	0	100	79	37	5	19	2	14	4	10	209	7	246	157	9	62	397	280	397	743	13	38	37	23	19	178	71	2	0	271	46	27	0	0
d__Viruses|k__Heunggongvirae|p__Uroviricota|c__Caudoviricetes|s__Klebsiella phage VLCpiS11a	Klebsiella phage VLCpiS11a	0	0	0	0	0	159	0	2	0	0	0	0	0	0	0	0	0	0	0	0	0	0	0	0	2	0	0	0	0	0	0	4	0	3	0	0	0	0	0	0	0	0	0	0	0	0	0	0
d__Viruses|k__Heunggongvirae|p__Uroviricota|c__Caudoviricetes|f__Drexlerviridae|g__Webervirus|s__Webervirus KpNIH2	Webervirus KpNIH2	0	0	0	0	0	0	0	0	3	0	0	1	0	0	0	14	0	0	0	0	0	0	0	0	0	0	0	0	144	0	0	0	0	4	0	0	0	0	0	0	0	0	0	0	0	254	0	0
d__Viruses|k__Heunggongvirae|p__Uroviricota|c__Caudoviricetes|o__Crassvirales|f__Suoliviridae|g__Buchavirus|s__Buchavirus coli	Buchavirus coli	0	0	0	0	0	0	0	0	0	0	384	0	0	3	0	0	0	0	2	0	0	0	4	0	0	0	0	0	0	0	0	0	0	69	0	0	70	0	0	0	0	5	0	0	0	90	13	0
d__Viruses|k__Heunggongvirae|p__Uroviricota|c__Caudoviricetes|f__Peduoviridae|g__Peduovirus|s__Peduovirus YPM50	Peduovirus YPM50	0	0	0	0	0	0	0	0	32	22	0	0	0	0	0	7	0	5	0	19	0	0	0	5	204	2	0	0	0	46	2	5	0	0	4	0	0	6	1	0	0	0	0	1	8	4	0	0
d__Viruses|k__Heunggongvirae|p__Uroviricota|c__Caudoviricetes|o__Crassvirales|f__Suoliviridae|g__Canhaevirus|s__Canhaevirus faecalis	Canhaevirus faecalis	0	1	0	0	0	0	0	0	0	0	0	0	0	0	87	0	0	0	0	0	0	0	0	0	0	0	0	0	0	0	0	0	0	0	0	0	0	0	0	89	0	76	0	0	0	121	22	1
d__Viruses|k__Heunggongvirae|p__Uroviricota|c__Caudoviricetes|g__Glaedevirus|s__Enterobacteria phage mEp460	Enterobacteria phage mEp460	0	688	167	39	571	0	469	8	1621	134	0	120	430	0	2	171	143	366	1	194	7	26	0	182	5611	2	106	70	0	146	875	397	753	2392	159	139	23	25	114	202	21	2	5	238	21	24	0	0
d__Viruses|k__Shotokuvirae|p__Cossaviricota|c__Quintoviricetes|o__Piccovirales|f__Parvoviridae|g__Bocaparvovirus|s__Primate bocaparvovirus 1	Primate bocaparvovirus 1	0	0	62008	0	0	0	0	0	0	20	0	0	0	0	0	0	0	44	0	0	0	0	0	0	0	0	2	0	0	0	0	0	0	0	0	0	0	0	0	0	0	0	0	2	0	0	0	0
d__Viruses|k__Bamfordvirae|p__Nucleocytoviricota|c__Megaviricetes|o__Pimascovirales|f__Ascoviridae|g__Ascovirus|s__Trichoplusia ni ascovirus 2c	Trichoplusia ni ascovirus 2c	3	29	17	0	0	2	0	0	80	0	2	2	7	13	13	20	2	4	2	3	7	0	5	19	0	1	6	1	2	3	0	5	0	0	0	4	0	1	0	3	0	0	0	5	2	1	0	0
d__Viruses|k__Heunggongvirae|p__Uroviricota|c__Caudoviricetes|g__Kwaitsingvirus|s__Kwaitsingvirus HK544	Kwaitsingvirus HK544	0	0	55	0	453	0	333	0	38	0	0	18	1	0	0	9	0	0	0	0	0	0	0	0	48	0	20	1	0	66	11	3	515	159	15	2	0	0	0	0	2	0	0	0	0	4	0	0
d__Viruses|k__Heunggongvirae|p__Uroviricota|c__Caudoviricetes|g__Punavirus|s__Punavirus SJ46	Punavirus SJ46	0	1032	52	12	35	193	81	27	681	75	0	117	128	0	3	1015	120	70	5	7	12	7	1	75	85	6	201	158	13	36	247	205	155	751	22	41	39	57	162	160	3	9	5	405	49	49	5	0
d__Viruses|k__Heunggongvirae|p__Uroviricota|c__Caudoviricetes|o__Crassvirales|f__Suoliviridae|g__Buchavirus|s__Buchavirus copri	Buchavirus copri	0	2	0	0	0	0	0	0	0	0	1310	0	0	0	3	0	1	1	5	0	0	0	18	0	0	0	0	0	0	0	0	0	0	13	0	0	220	0	0	477	1	59	0	0	1	77	14	2
d__Viruses|k__Heunggongvirae|p__Uroviricota|c__Caudoviricetes|s__Lactobacillus prophage Lj771	Lactobacillus prophage Lj771	0	0	327	0	0	220	394	2	0	0	0	712	1	0	0	0	0	0	0	0	0	0	0	1	0	247	13	17	0	0	0	2590	2	0	66	0	0	0	0	5	0	0	0	0	20	0	0	0
d__Viruses|k__Heunggongvirae|p__Uroviricota|c__Caudoviricetes|g__Uetakevirus|s__Uetakevirus phiV10	Uetakevirus phiV10	113	12	0	5	1760	0	0	389	7	773	0	6	4	0	0	3	0	0	0	1	0	0	4	0	2676	0	223	13	0	3	4	20	0	66	11	8	0	0	3	47	122	0	0	0	0	8	0	0
d__Viruses|k__Bamfordvirae|p__Preplasmiviricota|c__Tectiliviricetes|o__Rowavirales|f__Adenoviridae|g__Mastadenovirus|s__Human mastadenovirus E	Human mastadenovirus E	0	0	0	0	0	0	0	0	2	0	28	0	0	0	0	0	0	0	4	0	0	0	0	0	0	0	0	0	0	0	0	1	1	0	0	0	0	0	0	0	0	391	0	0	0	0	0	9
d__Viruses|k__Heunggongvirae|p__Uroviricota|c__Caudoviricetes|g__Lederbergvirus|s__Enterobacteria phage ST104	Enterobacteria phage ST104	0	1	0	0	138	0	67	0	0	11	0	0	0	0	0	2	0	0	0	0	0	0	0	0	0	0	7	0	0	0	1	0	89	0	0	0	0	0	0	1	2	1	0	1	0	4	0	0
d__Viruses|k__Heunggongvirae|p__Uroviricota|c__Caudoviricetes|g__Lambdavirus|s__Lambdavirus HK629	Lambdavirus HK629	0	3	0	0	375	0	58	0	0	0	0	0	1	0	0	1	17	2	0	1	0	0	0	6	22	0	1	0	0	0	0	0	95	0	0	0	0	0	1	1	1	0	0	88	0	0	0	0
d__Viruses|k__Heunggongvirae|p__Uroviricota|c__Caudoviricetes|g__Lederbergvirus|s__Salmonella phage UPF_BP1	Salmonella phage UPF_BP1	0	2	0	0	505	5	44	2	2	3	0	2	0	0	0	3	10	0	12	1	0	0	0	0	39	0	51	0	0	0	1	146	74	3	10	2	0	0	0	102	5	0	0	39	0	8	0	0
d__Viruses|k__Heunggongvirae|p__Uroviricota|c__Caudoviricetes|g__Kwaitsingvirus|s__Kwaitsingvirus HK446	Kwaitsingvirus HK446	0	1	52	0	34	0	58	1	14	2	0	0	4	0	0	11	0	0	1	3	0	0	0	0	39	0	3	1	0	6	2	18	120	0	2	0	0	0	1	17	0	0	0	0	3	7	0	0
d__Viruses|k__Heunggongvirae|p__Uroviricota|c__Caudoviricetes|o__Crassvirales|f__Intestiviridae|g__Jahgtovirus|s__Jahgtovirus intestinalis	Jahgtovirus intestinalis	0	0	0	0	0	0	1	1	0	0	2	2	0	0	0	5	11	0	0	0	0	0	0	0	0	0	0	0	0	0	0	0	1	168	0	0	0	0	0	0	0	0	1	0	0	0	0	0
d__Viruses|k__Bamfordvirae|p__Preplasmiviricota|c__Tectiliviricetes|o__Rowavirales|f__Adenoviridae|g__Mastadenovirus|s__Human mastadenovirus F	Human mastadenovirus F	0	16	0	0	0	0	0	0	0	0	3525	0	55	0	0	0	0	0	0	0	0	0	0	25	0	0	0	0	0	0	0	0	0	0	0	0	0	0	0	0	0	46681	0	0	0	0	0	0
d__Viruses|k__Heunggongvirae|p__Uroviricota|c__Caudoviricetes|g__Schubertvirus|s__Schubertvirus schubert	Schubertvirus schubert	1	1	0	2	9	4	2	6	0	10	0	0	0	0	7	1	0	1	0	0	0	0	0	1	4	0	203	0	148	0	0	1	0	0	0	5	1	0	0	1	0	1	0	7	0	0	4	0
d__Viruses|k__Heunggongvirae|p__Uroviricota|c__Caudoviricetes|f__Peduoviridae|g__Peduovirus|s__Escherichia phage P2_AC1	Escherichia phage P2_AC1	0	1	0	0	0	0	0	2	125	56	0	2	0	0	0	13	0	30	0	5	0	0	0	13	133	0	0	0	0	13	0	2	0	0	5	0	0	6	11	0	0	0	1	0	7	6	0	0
d__Viruses|k__Heunggongvirae|p__Uroviricota|c__Caudoviricetes|o__Crassvirales|f__Steigviridae|g__Kehishuvirus|s__Kehishuvirus splanchnicus	Kehishuvirus splanchnicus	0	0	0	0	0	0	0	5	0	0	0	0	2	151	0	0	2	0	0	0	6	2	0	2	0	0	0	0	0	0	2	0	0	0	0	3071	0	0	2	711	2	210	0	0	0	523	74	169
d__Viruses|k__Heunggongvirae|p__Uroviricota|c__Caudoviricetes|o__Crassvirales|f__Steigviridae|g__Kahnovirus|s__Kahnovirus oralis	Kahnovirus oralis	0	0	0	0	0	0	1	0	0	0	0	0	0	1364	0	0	0	0	0	0	0	0	0	0	0	0	0	0	0	0	0	0	1	0	0	0	1	0	1	0	0	0	3	1	0	0	0	1088
d__Viruses|k__Heunggongvirae|p__Uroviricota|c__Caudoviricetes|f__Peduoviridae|g__Peduovirus|s__Yersinia phage P37	Yersinia phage P37	0	0	0	0	0	0	0	0	117	33	0	9	0	0	0	23	0	33	0	18	0	0	0	14	46	0	0	0	1	22	2	0	0	0	2	1	1	1	25	0	0	0	0	0	23	1	0	0
d__Viruses|k__Heunggongvirae|p__Uroviricota|c__Caudoviricetes|g__Oslovirus|s__Oslovirus VASD	Oslovirus VASD	0	23	0	2	11	0	17	27	22	0	0	6	6	0	0	18	3	26	0	0	0	0	0	10	0	0	46	40	0	8	1	5	34	0	2	0	2	0	6	2	7	0	0	194	7	2	0	0
d__Viruses|k__Heunggongvirae|p__Uroviricota|c__Caudoviricetes|o__Crassvirales|f__Steigviridae|g__Mahlunavirus|s__Mahlunavirus rarus	Mahlunavirus rarus	0	0	0	1	0	0	1	1	0	0	10	0	5	796	0	1	1	0	0	0	5	1	0	1	0	0	0	1	0	4	0	0	1	0	0	0	0	0	0	0	3	1	20	2	2	0	0	318
d__Viruses|k__Shotokuvirae|p__Cossaviricota|c__Quintoviricetes|o__Piccovirales|f__Parvoviridae|g__Bocaparvovirus|s__Primate bocaparvovirus 2	Primate bocaparvovirus 2	0	0	106974	0	0	0	0	0	0	29	0	0	0	0	0	0	0	44	0	0	0	0	0	0	0	0	1	0	0	0	0	0	0	0	0	0	0	0	0	0	0	0	0	23	0	0	0	0
d__Viruses|k__Shotokuvirae|p__Cossaviricota|c__Quintoviricetes|o__Piccovirales|f__Parvoviridae|g__Dependoparvovirus|s__Adeno-associated dependoparvovirus A	Adeno-associated dependoparvovirus A	0	0	0	0	0	0	0	0	0	0	0	2	0	0	0	0	0	0	0	0	0	0	0	104	0	0	25	0	0	0	0	0	0	0	0	0	0	0	0	0	0	24683	0	0	0	0	0	0
d__Viruses|k__Heunggongvirae|p__Uroviricota|c__Caudoviricetes|s__Lactobacillus phage KC5a	Lactobacillus phage KC5a	0	0	700	0	0	686	1240	0	0	0	0	1736	2	0	0	0	0	0	0	0	0	0	0	1	0	520	58	31	0	0	1	8025	6	0	144	0	0	0	0	26	0	0	2	0	55	0	0	0
d__Viruses|k__Heunggongvirae|p__Uroviricota|c__Caudoviricetes|o__Crassvirales|f__Suoliviridae|g__Buchavirus|s__Buchavirus faecalis	Buchavirus faecalis	1	0	0	1	0	0	0	0	0	0	111366	0	0	0	0	0	0	4	26	0	0	3	0	0	0	0	0	0	0	1	1	0	0	0	0	1	292	0	0	325	1	179	3	0	0	187	45	0
d__Viruses|k__Heunggongvirae|p__Uroviricota|c__Caudoviricetes|s__Lactobacillus phage phi jlb1	Lactobacillus phage phi jlb1	0	2	639	0	0	481	915	0	0	0	0	1535	0	0	0	0	0	0	0	0	0	0	0	1	0	621	32	36	0	0	1	5416	0	0	145	0	0	0	0	19	0	0	0	0	23	0	0	0
d__Viruses|k__Heunggongvirae|p__Uroviricota|c__Caudoviricetes|o__Crassvirales|f__Suoliviridae|g__Burzaovirus|s__Burzaovirus faecalis	Burzaovirus faecalis	0	0	0	0	0	0	0	0	0	0	0	0	0	0	0	0	0	684	3	27	15	0	0	0	2	0	0	0	0	0	0	0	0	0	0	0	0	0	0	0	0	0	0	0	0	0	0	1189
d__Viruses|k__Heunggongvirae|p__Uroviricota|c__Caudoviricetes|o__Crassvirales|f__Steigviridae|g__Kehishuvirus|s__Kehishuvirus primarius	Kehishuvirus primarius	2	0	0	0	0	0	0	0	0	0	0	0	0	120	0	0	0	0	0	0	9	1	0	0	0	0	0	0	0	0	2	0	0	0	0	0	1	0	0	0	0	0	0	0	3	0	0	297
d__Viruses|k__Bamfordvirae|p__Preplasmiviricota|c__Tectiliviricetes|o__Rowavirales|f__Adenoviridae|g__Mastadenovirus|s__Simian mastadenovirus F	Simian mastadenovirus F	0	3	0	0	0	0	0	0	0	0	294	0	6	0	0	0	0	0	0	0	0	0	0	4	0	0	1	0	0	0	0	0	0	0	0	0	0	0	0	0	0	3646	0	0	0	0	0	0
d__Viruses|k__Heunggongvirae|p__Uroviricota|c__Caudoviricetes|g__Diegovirus|s__Diegovirus POCJ13	Diegovirus POCJ13	0	3	0	0	1	8	0	4	0	0	0	17	1	0	0	101	8	3	0	0	0	0	0	3	0	0	1	8	0	18	0	22	0	1	2	0	1	0	9	13	137	0	0	58	0	3	0	0
d__Viruses|k__Heunggongvirae|p__Uroviricota|c__Caudoviricetes|o__Crassvirales|f__Steigviridae|g__Mahstovirus|s__Mahstovirus faecalis	Mahstovirus faecalis	0	0	0	0	0	0	0	0	0	0	0	1	0	1	0	0	1	1	0	0	0	8	0	0	0	0	0	0	0	0	0	0	0	0	0	0	0	0	0	245	1	0	0	0	0	0	0	184
d__Viruses|k__Heunggongvirae|p__Uroviricota|c__Caudoviricetes|f__Peduoviridae|g__Gegavirus|s__Gegavirus ST15OXA48phi141	Gegavirus ST15OXA48phi141	107	1	0	0	21	23	0	4	201	2	0	0	0	0	0	5	2	0	0	1	0	0	0	0	20	0	0	0	1953	10	0	5	8	6	0	1	2	0	0	0	1	3	0	15	0	0	0	0
d__Viruses|k__Heunggongvirae|p__Uroviricota|c__Caudoviricetes|g__Lederbergvirus|s__Salmonella phage vB_SemP_Emek	Salmonella phage vB_SemP_Emek	0	2	0	1	732	0	0	0	11	0	0	0	0	0	0	0	5	0	1	3	0	1	0	0	1	0	29	0	0	5	0	112	15	0	11	7	0	0	0	60	3	0	0	0	1	16	0	0
d__Viruses|k__Heunggongvirae|p__Uroviricota|c__Caudoviricetes|g__Shamshuipovirus|s__Shamshuipovirus mEpX2	Shamshuipovirus mEpX2	0	0	5	0	137	0	27	0	0	0	0	0	0	0	0	0	0	0	1	0	0	2	1	0	4	0	6	1	0	0	13	0	47	27	0	0	0	0	1	8	1	0	0	1	0	2	0	0
d__Viruses|k__Heunggongvirae|p__Uroviricota|c__Caudoviricetes|o__Crassvirales|f__Suoliviridae|g__Cohcovirus|s__Cohcovirus hiberniae	Cohcovirus hiberniae	0	0	0	1	0	0	0	1	0	0	1	0	0	4	1228	0	0	0	0	0	0	53	0	0	0	1	0	0	0	0	0	0	0	0	5	0	0	40	1	11	0	0	0	0	0	2	1	0
d__Viruses|k__Bamfordvirae|p__Preplasmiviricota|c__Tectiliviricetes|o__Rowavirales|f__Adenoviridae|g__Mastadenovirus|s__Human mastadenovirus A	Human mastadenovirus A	0	2	0	0	0	0	0	40	0	0	62	0	1	2	0	0	0	0	0	0	0	38	0	0	0	0	0	0	0	0	0	0	0	0	0	0	0	0	0	0	2	985	0	0	0	1	0	0
d__Viruses|k__Heunggongvirae|p__Uroviricota|c__Caudoviricetes|o__Crassvirales|f__Suoliviridae|g__Burzaovirus|s__Burzaovirus coli	Burzaovirus coli	0	0	0	0	0	0	0	0	0	0	1	0	0	0	1	0	0	950	4	59	56	1	0	0	0	0	0	0	0	0	0	1	0	0	0	0	0	0	0	0	0	0	0	0	0	0	0	1531
d__Viruses|k__Heunggongvirae|p__Uroviricota|c__Caudoviricetes|g__Cuauhtlivirus|s__Cuauhtlivirus mEpX1	Cuauhtlivirus mEpX1	0	1	0	0	334	0	189	0	12	4	0	0	0	0	0	0	13	0	0	0	0	0	0	3	18	0	12	0	22	0	2	0	314	1	13	0	0	0	0	6	11	0	0	72	0	0	0	0
d__Viruses|k__Heunggongvirae|p__Uroviricota|c__Caudoviricetes|g__Bievrevirus|s__Bievrevirus bv4A7	Bievrevirus bv4A7	35	1934	58	186	1386	25	1488	293	1927	361	0	1054	1057	0	9	945	1212	534	17	49	17	23	3	326	879	20	1455	988	892	642	1204	1540	2941	2012	59	410	172	74	102	1038	262	2	67	802	407	123	0	0
d__Viruses|k__Heunggongvirae|p__Uroviricota|c__Caudoviricetes|g__Diegovirus|s__Diegovirus dv7502Stx	Diegovirus dv7502Stx	0	63	6	4	131	0	148	25	50	13	0	30	50	0	2	17	54	28	1	1	0	11	0	24	34	2	98	72	14	35	160	59	307	99	8	16	1	2	10	25	20	0	0	427	3	8	0	0
d__Viruses|k__Heunggongvirae|p__Uroviricota|c__Caudoviricetes|o__Crassvirales|f__Suoliviridae|g__Blohavirus|s__Blohavirus americanus	Blohavirus americanus	0	0	0	0	0	0	2	1	0	0	255	0	5	0	2474	0	0	0	2192	1	0	1	0	0	0	0	0	2	0	0	0	0	1	0	0	0	28	0	1	34	0	0	1	1	0	210	447	1
d__Viruses|k__Heunggongvirae|p__Uroviricota|c__Caudoviricetes|f__Peduoviridae|g__Peduovirus|s__Peduovirus L413C	Peduovirus L413C	0	11	0	0	0	0	0	0	107	31	0	6	6	0	0	18	0	8	1	55	0	2	0	6	48	0	0	0	0	0	22	3	0	0	1	1	153	6	6	1	0	0	1	107	19	2	0	0
d__Viruses|k__Heunggongvirae|p__Uroviricota|c__Caudoviricetes|g__Oengusvirus|s__Oengusvirus oengus	Oengusvirus oengus	0	11	0	0	0	0	0	0	0	0	129	0	5	91	9	1	0	458	64	76	21	101	206	16	34	0	0	0	0	0	0	0	0	0	0	11	111	62	91	0	40	2	1	336	2784	335	63	18
d__Viruses|k__Heunggongvirae|p__Uroviricota|c__Caudoviricetes|g__Muvirus|s__Muvirus SfMu	Muvirus SfMu	0	1	0	2	0	0	0	0	29	0	0	12	5	0	0	36	0	0	4	0	0	0	0	4	0	0	0	0	0	0	8	0	0	0	57	0	4	2	6	2	0	0	3	22	3	0	0	0
d__Viruses|k__Heunggongvirae|p__Uroviricota|c__Caudoviricetes|s__Enterobacteria phage SfI	Enterobacteria phage SfI	0	174	328	71	2	0	481	8	23	72	0	239	82	0	2	77	12	2	2	46	2	82	2	2	5	0	64	63	0	20	2006	113	918	43	5	25	1	4	4	103	13	0	13	0	0	63	0	0
d__Viruses|k__Heunggongvirae|p__Uroviricota|c__Caudoviricetes|g__Oslovirus|s__Oslovirus Lyz12581Vzw	Oslovirus Lyz12581Vzw	0	12	11	0	44	0	13	8	18	1	0	18	2	0	0	48	13	6	0	2	0	0	0	6	14	0	52	47	0	6	48	0	19	14	1	6	0	0	10	1	39	0	0	59	1	4	0	0
d__Viruses|k__Heunggongvirae|p__Uroviricota|c__Caudoviricetes|f__Peduoviridae|g__Peduovirus|s__Peduovirus pro147	Peduovirus pro147	0	8	0	10	0	0	0	3	362	171	0	67	1	0	0	222	0	7	0	3	0	0	0	5	38	0	0	0	0	12	2	10	0	0	0	5	0	14	12	0	0	1	0	12	7	5	0	0
d__Viruses|k__Heunggongvirae|p__Uroviricota|c__Caudoviricetes|s__Enterobacteria phage SfV	Enterobacteria phage SfV	0	87	460	53	113	0	678	10	164	11	0	258	1	0	1	78	0	14	3	65	0	54	0	3	96	0	2	0	0	40	1959	221	1266	262	19	29	2	7	0	159	9	0	4	0	10	39	2	0
d__Viruses|k__Heunggongvirae|p__Uroviricota|c__Caudoviricetes|o__Crassvirales|f__Suoliviridae|g__Buorbuivirus|s__Buorbuivirus hominis	Buorbuivirus hominis	0	0	0	0	0	0	0	0	0	2	334	0	0	1	67	0	0	0	15	0	0	0	0	0	0	0	0	0	0	0	0	0	0	0	0	0	0	0	0	142	0	180	0	0	0	259	41	0
d__Viruses|k__Heunggongvirae|p__Uroviricota|c__Caudoviricetes|o__Crassvirales|f__Suoliviridae|g__Buchavirus|s__Buchavirus splanchnicus	Buchavirus splanchnicus	0	0	0	0	0	0	0	0	0	0	1912	0	0	0	54	0	0	0	2	0	0	0	0	0	0	0	0	0	0	0	0	0	0	0	0	0	103	0	0	70	0	54	0	0	0	84	13	0
d__Viruses|k__Heunggongvirae|p__Uroviricota|c__Caudoviricetes|g__Moineauvirus|s__Streptococcus phage P7574	Streptococcus phage P7574	23	3	910	0	2	0	3	2	64	0	0	1	0	0	8	46	1	0	0	0	0	0	0	0	8	0	0	1	7	0	0	38	0	4	0	3	0	1	1	2	4	0	2	3	1	0	0	0
d__Viruses|k__Heunggongvirae|p__Uroviricota|c__Caudoviricetes|f__Straboviridae|g__Chrysonvirus|s__Chrysonvirus as5	Chrysonvirus as5	2	0	2	2	15	4	0	0	1	4	0	0	1	0	2	0	0	1	2	0	0	1	0	11	1	0	3	1	12	0	0	0	0	0	0	0	1	5	3	1	2	1	0	1	0	0	0	1
d__Viruses|k__Heunggongvirae|p__Uroviricota|c__Caudoviricetes|f__Peduoviridae|g__Quadragintavirus|s__Quadragintavirus ev015	Quadragintavirus ev015	0	0	0	0	0	0	22	0	5	0	0	9	0	0	0	0	0	0	0	0	0	12	0	0	0	1257	0	0	0	146	228	0	0	0	0	89	0	0	0	7	0	0	0	0	0	0	0	0
d__Viruses|k__Heunggongvirae|p__Uroviricota|c__Caudoviricetes|o__Crassvirales|f__Steigviridae|g__Paundivirus|s__Paundivirus hollandii	Paundivirus hollandii	0	0	0	0	0	0	0	0	0	0	0	0	22	1028	0	0	0	12	0	0	9	1	0	0	0	0	0	0	1	0	0	0	1	0	0	27	1	0	0	0	0	0	12	1	0	0	0	772
d__Viruses|k__Heunggongvirae|p__Uroviricota|c__Caudoviricetes|s__Lactobacillus phage phiadh	Lactobacillus phage phiadh	0	0	302	0	0	486	3820	0	0	1	0	1273	0	0	0	0	0	0	0	0	0	0	0	0	0	668	31	51	0	0	0	9441	2	0	26	0	0	0	0	10	0	0	0	0	244	0	0	0
d__Viruses|k__Heunggongvirae|p__Uroviricota|c__Caudoviricetes|f__Peduoviridae|g__Peduovirus|s__Peduovirus P2	Peduovirus P2	0	41	0	5	0	0	0	3	678	110	0	47	28	0	0	93	2	148	0	43	0	3	0	52	444	0	0	0	0	156	146	38	0	0	37	10	12	40	50	12	5	0	7	442	73	44	0	0
d__Viruses|k__Heunggongvirae|p__Uroviricota|c__Caudoviricetes|s__Lactobacillus prophage Lj965	Lactobacillus prophage Lj965	0	0	7	0	0	15	32	0	0	0	0	50	0	0	0	0	0	0	0	0	0	0	0	4	0	0	29	4	0	0	0	168	0	0	1	0	0	0	0	1	0	0	0	0	372	0	0	0
d__Viruses|k__Heunggongvirae|p__Uroviricota|c__Caudoviricetes|f__Straboviridae|g__Jiaodavirus|s__Jiaodavirus kppv15	Jiaodavirus kppv15	50	0	0	0	0	8	0	1	7	1	0	0	0	0	0	3	0	0	0	0	0	0	0	4	2	0	0	0	39	0	0	0	0	5	0	0	0	0	4	0	0	0	1	0	0	0	0	0
d__Viruses|k__Heunggongvirae|p__Uroviricota|c__Caudoviricetes|o__Crassvirales|f__Suoliviridae|g__Birpovirus|s__Birpovirus hiberniae	Birpovirus hiberniae	0	0	0	1	0	0	0	4	0	0	31	1	4	0	13277	0	0	0	399	0	0	0	0	0	0	0	0	0	0	0	1	0	0	0	0	0	0	0	1	157	0	101	0	0	0	247	46	18
d__Viruses|k__Heunggongvirae|p__Uroviricota|c__Caudoviricetes|o__Crassvirales|f__Suoliviridae|g__Burzaovirus|s__Burzaovirus intestinihominis	Burzaovirus intestinihominis	0	0	0	0	0	0	0	0	0	0	0	1	0	0	0	0	0	2140	12	136	11	0	0	0	0	0	0	0	0	0	0	0	0	0	0	0	0	0	0	0	0	0	0	0	0	0	0	3166
d__Viruses|k__Heunggongvirae|p__Uroviricota|c__Caudoviricetes|g__Brigitvirus|s__Brigitvirus brigit	Brigitvirus brigit	0	8	0	12	0	0	0	0	0	0	57	0	20	323	56	0	1	7	301	360	220	279	14042	6	0	0	0	0	0	0	0	0	0	0	0	0	2	414	3182	0	581	6	41	0	0	91	0	28
d__Viruses|k__Heunggongvirae|p__Uroviricota|c__Caudoviricetes|s__Enterococcus phage EF62phi	Enterococcus phage EF62phi	0	0	2	0	58	1053	18	0	444	9	0	0	0	0	0	0	0	0	0	0	0	0	0	401	0	0	0	0	0	2	43	166	0	0	0	0	0	0	0	0	0	0	0	0	0	0	0	0
d__Viruses|k__Heunggongvirae|p__Uroviricota|c__Caudoviricetes|g__Marienburgvirus|s__Marienburgvirus JLK2012	Marienburgvirus JLK2012	2	482	67	31	513	10	1155	216	707	80	0	193	216	1	4	205	691	140	11	69	0	23	2	236	465	6	723	623	7	429	726	712	1694	1212	132	102	72	17	195	416	59	2	3	6026	148	36	2	0
d__Viruses|k__Heunggongvirae|p__Uroviricota|c__Caudoviricetes|o__Crassvirales|f__Suoliviridae|g__Aurodevirus|s__Aurodevirus hominis	Aurodevirus hominis	0	0	0	0	0	1	0	0	0	0	31	0	1	0	0	0	0	1	6	0	0	0	0	0	0	1	0	9	0	0	0	0	0	0	0	0	0	0	0	147	0	92	0	0	0	247	44	0
d__Viruses|k__Heunggongvirae|p__Uroviricota|c__Caudoviricetes|o__Crassvirales|f__Steigviridae|g__Pamirivirus|s__Pamirivirus faecium	Pamirivirus faecium	0	0	0	0	0	0	0	0	0	0	0	0	6	794	0	0	0	68	0	0	117	0	1	0	0	2	0	0	0	0	0	0	0	0	0	0	7	0	0	0	0	0	0	0	0	1	0	543
d__Viruses|k__Heunggongvirae|p__Uroviricota|c__Caudoviricetes|g__Toutatisvirus|s__Toutatisvirus toutatis	Toutatisvirus toutatis	0	448	0	207	0	0	0	0	0	0	137	5	512	342	16	608	0	151	398	135	97	522	695	57	2	0	0	0	0	0	0	0	0	25	0	557	24	182	225	0	18	146	51	339	2597	565	72	237
d__Viruses|k__Heunggongvirae|p__Uroviricota|c__Caudoviricetes|o__Crassvirales|f__Suoliviridae|g__Afonbuvirus|s__Afonbuvirus coli	Afonbuvirus coli	0	0	1	0	0	0	0	0	0	0	119	0	589	90	39	0	0	0	2	1	0	0	1	0	0	0	0	0	0	0	0	0	0	0	0	0	0	2	5054	294	0	70	1	1	0	35384	61720	1
d__Viruses|k__Heunggongvirae|p__Uroviricota|c__Caudoviricetes|g__Shamshuipovirus|s__Shamshuipovirus HK022	Shamshuipovirus HK022	0	10	14	2	193	0	0	1	2	0	0	4	1	0	0	1	39	0	4	2	0	0	0	5	23	0	61	26	0	6	1	0	4	0	0	0	0	0	4	3	0	0	0	221	0	12	0	0
d__Viruses|k__Bamfordvirae|p__Preplasmiviricota|c__Tectiliviricetes|o__Rowavirales|f__Adenoviridae|g__Mastadenovirus|s__Human mastadenovirus D	Human mastadenovirus D	0	2	0	0	0	0	0	0	343	0	190	0	0	0	0	0	0	0	3145	0	1	0	0	0	0	0	2	0	0	0	0	0	2489	0	0	0	0	0	0	0	0	390	0	0	0	0	0	7997
d__Viruses|k__Heunggongvirae|p__Uroviricota|c__Caudoviricetes|o__Crassvirales|f__Intestiviridae|g__Jahgtovirus|s__Jahgtovirus intestinihominis	Jahgtovirus intestinihominis	1	0	0	0	0	0	0	0	0	0	0	0	10	31	1	0	5	5	2	0	0	4	6	0	0	0	0	0	0	0	0	0	0	3899	0	0	331	1	0	2	0	0	0	0	0	0	0	0
d__Viruses|k__Heunggongvirae|p__Uroviricota|c__Caudoviricetes|o__Crassvirales|f__Suoliviridae|g__Birpovirus|s__Birpovirus hominis	Birpovirus hominis	0	0	1	2	0	0	1	0	1	0	12	0	0	1	26600	0	0	0	443	0	0	0	0	0	0	0	0	0	0	0	0	0	0	0	0	3	0	0	4	177	0	51	1	0	0	140	50	0
d__Viruses|k__Heunggongvirae|p__Uroviricota|c__Caudoviricetes|s__Streptococcus phage phiARI0462	Streptococcus phage phiARI0462	54	2	180	0	21	1	0	1	1	1	0	0	0	0	0	0	0	0	0	0	0	0	0	1	4	7	19	3	1	1	0	18	1	0	0	0	0	0	0	1	8	0	0	2	0	0	0	0
d__Viruses|k__Heunggongvirae|p__Uroviricota|c__Caudoviricetes|o__Crassvirales|f__Suoliviridae|g__Buchavirus|s__Buchavirus intestinalis	Buchavirus intestinalis	0	0	0	0	0	0	0	0	0	0	16438	0	0	1	87	0	0	0	28	0	0	1	1	0	0	0	0	0	0	0	1	0	0	0	0	1	25411	0	0	477	0	248	1	0	0	416	73	0
d__Viruses|k__Heunggongvirae|p__Uroviricota|c__Caudoviricetes|o__Crassvirales|f__Suoliviridae|g__Buchavirus|s__Buchavirus oralis	Buchavirus oralis	0	0	0	0	0	0	3	0	0	0	2540	0	0	2	32	0	0	0	4	0	0	0	4	0	0	0	0	0	0	0	0	0	0	30	0	0	140	0	4	1	0	0	0	0	0	0	0	1
d__Viruses|k__Heunggongvirae|p__Uroviricota|c__Caudoviricetes|g__Muvirus|s__Escherichia phage D108	Escherichia phage D108	0	0	0	0	0	0	0	0	11	0	0	25	0	0	0	114	0	0	4	0	0	0	0	1	0	0	0	0	0	0	0	0	0	0	185	0	0	9	3	0	1	1	6	0	0	0	0	0
d__Viruses|k__Heunggongvirae|p__Uroviricota|c__Caudoviricetes|g__Yautsimvirus|s__Yautsimvirus HK140	Yautsimvirus HK140	0	0	44	8	433	0	232	0	47	3	0	2	1	0	2	10	9	0	7	7	0	0	0	3	74	0	25	0	3	6	66	39	376	43	18	8	2	0	3	57	1	0	0	37	2	1	0	0
d__Viruses|k__Heunggongvirae|p__Uroviricota|c__Caudoviricetes|g__Traversvirus|s__Traversvirus PA28	Traversvirus PA28	0	35	0	2	11	0	91	19	47	0	0	21	19	0	1	13	103	24	2	1	0	3	0	24	8	0	82	90	0	4	161	116	191	6	1	52	4	1	5	63	13	0	0	683	5	0	0	0
d__Viruses|k__Heunggongvirae|p__Uroviricota|c__Caudoviricetes|f__Straboviridae|g__Tequatrovirus|s__Tequatrovirus T4	Tequatrovirus T4	0	15	12	1	10	0	24	4	25	14	0	7	20	0	0	5	9	3	0	0	0	1	0	0	32	0	22	13	0	0	23	18	40	50	1	6	1	2	1	19	3	0	0	47	3	3	0	0
d__Viruses|k__Heunggongvirae|p__Uroviricota|c__Caudoviricetes|f__Kyanoviridae|g__Charybdisvirus|s__Charybdisvirus scam3	Charybdisvirus scam3	0	3	0	0	0	0	2	0	0	1	7	3	3	8	4	0	1	19	0	0	3	4	3	0	0	0	0	0	0	1	0	0	0	0	0	1	0	2	12	0	3	0	23	0	1	0	1	19
d__Viruses|k__Heunggongvirae|p__Uroviricota|c__Caudoviricetes|s__Enterobacteria phage P4	Enterobacteria phage P4	0	554	0	3	52	12	0	337	5	257	0	166	13	0	0	0	247	0	0	13	12	70	0	2	5	0	0	2	62	8	2134	13	32	493	14	11	2	66	0	84	68	11	2	0	2	2	0	0
d__Viruses|k__Heunggongvirae|p__Uroviricota|c__Caudoviricetes|f__Peduoviridae|g__Peduovirus|s__Peduovirus YPM22	Peduovirus YPM22	0	2	0	0	0	0	0	2	41	6	0	7	0	0	0	13	0	10	0	4	0	0	0	9	80	0	0	0	0	31	0	0	0	0	1	0	0	1	14	0	0	0	0	0	2	1	0	0
d__Viruses|k__Heunggongvirae|p__Uroviricota|c__Caudoviricetes|o__Crassvirales|f__Suoliviridae|g__Buchavirus|s__Buchavirus hiberniae	Buchavirus hiberniae	0	0	0	0	0	0	0	0	0	0	40264	0	0	0	1	0	0	0	7	0	0	0	16	1	0	0	0	0	0	0	0	0	0	46	0	0	318	0	2	2	0	40	0	0	0	80	19	0
d__Viruses|k__Heunggongvirae|p__Uroviricota|c__Caudoviricetes|g__Camtrevirus|s__Camtrevirus S3501	Camtrevirus S3501	0	36	0	3	0	0	0	0	0	0	5	0	23	15	1	65	1	9	2	0	8	1	41	8	0	0	0	0	7	0	2	0	0	2	0	11	2	5	7	0	3	15	0	18	112	40	5	0
d__Viruses|k__Heunggongvirae|p__Uroviricota|c__Caudoviricetes|o__Crassvirales|f__Suoliviridae|g__Aurodevirus|s__Aurodevirus hiberniae	Aurodevirus hiberniae	3	1	0	0	1	0	0	0	0	0	235	1	1	1	197	0	0	0	12	0	0	3	0	0	0	0	0	1	0	0	0	0	0	0	0	0	1	0	2	1239	0	422	0	0	0	665	138	0
d__Viruses|k__Heunggongvirae|p__Uroviricota|c__Caudoviricetes|g__Jouyvirus|s__Jouyvirus jv1H12	Jouyvirus jv1H12	0	294	257	74	222	0	269	16	790	94	0	146	260	0	8	185	113	20	10	88	2	15	1	32	176	2	4013	3360	39	91	303	28	416	121	65	23	12	7	34	89	14	4	9	613	105	9	0	0
d__Viruses|k__Heunggongvirae|p__Uroviricota|c__Caudoviricetes|o__Crassvirales|f__Suoliviridae|g__Aurodevirus|s__Aurodevirus intestinalis	Aurodevirus intestinalis	0	0	0	0	0	0	0	0	0	0	94	0	0	0	210	0	0	0	1	0	0	0	1	0	0	0	0	0	0	0	0	0	0	0	0	0	26	0	1	24	0	2	0	0	0	80	13	1
d__Viruses|k__Heunggongvirae|p__Uroviricota|c__Caudoviricetes|f__Peduoviridae|g__Peduovirus|s__Peduovirus YPM46	Peduovirus YPM46	0	1	0	0	0	0	0	2	67	23	0	4	1	0	0	14	0	132	0	0	0	0	0	18	112	0	0	0	0	20	3	3	0	0	4	1	0	10	24	0	0	1	1	0	8	0	0	0
d__Viruses|k__Heunggongvirae|p__Uroviricota|c__Caudoviricetes|g__Moineauvirus|s__Streptococcus phage CHPC1041	Streptococcus phage CHPC1041	0	4	0	0	0	0	287	0	5	0	1	0	0	1	0	9	0	1	0	1	0	0	0	0	0	0	0	0	0	0	4	92	4	0	0	0	0	0	0	0	4	0	0	0	0	0	0	0
d__Viruses|k__Heunggongvirae|p__Uroviricota|c__Caudoviricetes|g__Muvirus|s__Muvirus mu	Muvirus mu	0	1	0	0	0	0	0	0	87	3	0	18	10	0	0	30	0	0	1	0	0	0	0	12	0	0	0	0	0	0	20	0	0	0	67	0	3	2	12	0	0	0	0	77	1	0	0	0
d__Viruses|k__Heunggongvirae|p__Uroviricota|c__Caudoviricetes|o__Crassvirales|f__Suoliviridae|g__Blohavirus|s__Blohavirus faecalis	Blohavirus faecalis	1	0	0	0	0	0	0	0	0	2	176	0	0	0	6270	0	0	0	2427	0	0	0	0	0	0	0	0	0	0	0	0	0	2	0	0	0	3	0	0	327	0	3	0	0	0	45	11	0
d__Viruses|k__Heunggongvirae|p__Uroviricota|c__Caudoviricetes|s__Streptococcus phage 20617	Streptococcus phage 20617	290	208	1735	36	86	187	641	12	632	43	2	155	34	19	53	368	16	24	1	1	13	16	23	26	119	42	512	57	32	54	15	895	56	35	33	39	15	9	7	5	103	6	16	641	66	1	0	5
d__Viruses|k__Heunggongvirae|p__Uroviricota|c__Caudoviricetes|o__Crassvirales|f__Suoliviridae|g__Afonbuvirus|s__Afonbuvirus intestinihominis	Afonbuvirus intestinihominis	0	0	0	0	0	0	1	0	0	0	453	0	1541	207	71	0	0	0	9	2	0	0	8	0	0	0	0	0	0	0	0	0	1	0	0	0	0	0	2188	6	0	54	0	0	0	83654	147398	0
d__Viruses|k__Heunggongvirae|p__Uroviricota|c__Caudoviricetes|o__Crassvirales|f__Suoliviridae|g__Canhaevirus|s__Canhaevirus hiberniae	Canhaevirus hiberniae	0	0	0	1	0	0	0	0	0	3	2	0	0	0	23033	0	1	0	0	0	0	15	0	0	0	0	1	0	1	0	2	0	0	0	0	0	1	0	1	16	6	8	0	0	1	1	1	0
d__Viruses|k__Heunggongvirae|p__Uroviricota|c__Caudoviricetes|g__Deseoctovirus|s__Deseoctovirus DS8	Deseoctovirus DS8	0	22	19	1	10	0	33	0	28	13	0	10	13	0	0	9	13	7	2	9	0	0	0	1	4	2	19	34	0	0	42	30	46	55	2	15	0	0	1	20	1	0	2	57	4	0	0	0
d__Viruses|k__Heunggongvirae|p__Uroviricota|c__Caudoviricetes|g__Lederbergvirus|s__Enterobacteria phage Sf101	Enterobacteria phage Sf101	0	15	0	2	3209	0	1	1	24	1	0	0	7	0	0	3	15	0	35	0	0	0	2	1	46	0	129	0	0	0	0	231	6	3	8	49	0	0	0	140	1	0	0	91	8	18	0	0
d__Viruses|k__Heunggongvirae|p__Uroviricota|c__Caudoviricetes|o__Crassvirales|f__Suoliviridae|g__Afonbuvirus|s__Afonbuvirus faecalis	Afonbuvirus faecalis	0	0	0	0	0	0	0	0	0	0	200	0	586	195	21	0	0	0	0	0	0	0	0	0	0	0	0	0	1	0	0	0	0	0	0	1	0	0	1663	261	0	138	0	0	1	31742	55557	0
d__Viruses|k__Heunggongvirae|p__Uroviricota|c__Caudoviricetes|f__Peduoviridae|g__Peduovirus|s__Peduovirus R18C	Peduovirus R18C	0	0	45	0	0	0	0	2	26	20	0	1	1	0	0	7	0	14	0	11	0	1	0	14	1	0	0	0	0	12	0	7	0	0	5	2	0	7	5	0	0	0	3	0	2	0	0	0
d__Viruses|k__Heunggongvirae|p__Uroviricota|c__Caudoviricetes|g__Poindextervirus|s__Poindextervirus rogue	Poindextervirus rogue	6	17	30	6	3	10	17	0	13	11	4	3	16	9	2	3	3	9	2	4	2	6	3	5	7	2	16	16	1	14	5	5	8	0	6	9	3	1	6	8	18	10	4	37	4	5	3	2
d__Viruses|k__Heunggongvirae|p__Uroviricota|c__Caudoviricetes|f__Peduoviridae|g__Peduovirus|s__Peduovirus fiAA91ss	Peduovirus fiAA91ss	0	375	886	24	49	15	0	2	528	167	0	310	8	0	6	635	15	64	0	8	7	0	0	44	332	54	1733	1340	0	63	4	545	20	1335	23	3	16	70	51	346	23	0	13	0	139	4	0	0
d__Viruses|k__Heunggongvirae|p__Uroviricota|c__Caudoviricetes|g__Bertelyvirus|s__Bertelyvirus BL9	Bertelyvirus BL9	8	9	6	1	1	3	4	1	5	0	3	3	5	3	0	2	7	2	4	2	4	6	3	1	1	2	4	1	2	2	3	0	6	2	1	0	0	5	23	16	10	3	7	4	1	3	1	3
d__Viruses|k__Heunggongvirae|p__Uroviricota|c__Caudoviricetes|f__Peduoviridae|g__Peduovirus|s__Peduovirus P24E6b	Peduovirus P24E6b	0	7	0	0	0	0	0	9	89	50	0	9	0	0	0	25	0	9	0	2	0	0	0	3	291	0	0	0	0	17	0	41	0	0	21	33	0	15	3	4	0	0	1	0	11	8	0	0
d__Viruses|k__Heunggongvirae|p__Uroviricota|c__Caudoviricetes|g__Pankowvirus|s__Pankowvirus YYZ2008	Pankowvirus YYZ2008	23	321	271	41	380	15	697	174	683	118	0	146	211	0	5	186	420	114	16	64	4	16	1	107	515	7	525	405	20	235	655	702	1164	975	73	108	105	14	60	481	44	4	2	2645	103	49	0	0
d__Viruses|k__Heunggongvirae|p__Uroviricota|c__Caudoviricetes|g__Mushuvirus|s__Mushuvirus mushu	Mushuvirus mushu	2	1	1	0	0	2	2	0	0	5	756	3	1	1092	32	24128	0	658	7	127	2155	2421	47	0	0	0	0	0	0	1	0	0	1	0	0	1	0	449	2	0	16	14	2	0	0	6	2	2
d__Viruses|k__Heunggongvirae|p__Uroviricota|c__Caudoviricetes|g__Wongtaivirus|s__Wongtaivirus HK542	Wongtaivirus HK542	0	0	24	0	108	0	19	5	2	1	0	2	0	0	0	12	6	0	0	1	0	0	0	4	20	0	2	0	0	0	18	0	47	34	5	0	0	0	1	3	23	0	1	45	0	5	0	0
d__Viruses|k__Heunggongvirae|p__Uroviricota|c__Caudoviricetes|g__Saikungvirus|s__Saikungvirus HK633	Saikungvirus HK633	0	0	0	0	71	0	15	0	0	0	0	3	2	0	0	0	0	0	1	3	0	7	0	0	37	0	7	0	7	0	159	99	45	49	6	6	0	0	0	56	0	0	0	1	0	5	0	0
d__Viruses|k__Heunggongvirae|p__Uroviricota|c__Caudoviricetes|g__Pankowvirus|s__Pankowvirus pv1717	Pankowvirus pv1717	0	383	229	55	314	0	645	166	832	146	0	160	235	0	4	253	328	137	9	36	0	31	4	117	525	12	606	521	1	150	651	591	1117	1231	65	140	95	22	84	332	46	0	2	2634	114	36	0	0
d__Viruses|k__Heunggongvirae|p__Uroviricota|c__Caudoviricetes|s__Escherichia phage TL-2011b	Escherichia phage TL-2011b	43	602	462	100	1963	0	884	729	792	642	0	200	402	0	4	316	355	200	11	79	5	46	3	146	2861	17	1179	697	0	238	1132	900	1351	1679	76	195	136	25	65	611	155	3	21	1468	102	66	0	0
d__Viruses|k__Heunggongvirae|p__Uroviricota|c__Caudoviricetes|g__Nochtlivirus|s__Nochtlivirus mEp235	Nochtlivirus mEp235	15	1	22	0	3	0	25	1	3	0	0	0	0	0	0	7	27	0	0	1	0	0	0	6	53	0	0	0	1	11	0	30	47	65	2	0	0	0	7	18	1	0	0	182	0	1	0	0
d__Viruses|k__Heunggongvirae|p__Uroviricota|c__Caudoviricetes|g__Jerseyvirus|s__Salmonella phage JD01	Salmonella phage JD01	0	22	18	4	23	0	43	6	25	5	0	12	23	0	0	10	3	1	0	0	1	1	0	3	45	2	33	31	0	4	42	32	61	58	3	9	4	0	0	28	1	0	0	16	8	3	0	0
d__Viruses|k__Heunggongvirae|p__Uroviricota|c__Caudoviricetes|g__Eponavirus|s__Eponavirus epona	Eponavirus epona	0	0	0	0	0	0	1	0	0	0	205	0	0	474	65	18311	0	213	954	3	1680	397	14	2	0	0	0	0	0	0	0	0	0	937	1	1356	0	8	2	0	4	0	0	0	0	10790	1457	13
d__Viruses|k__Heunggongvirae|p__Uroviricota|c__Caudoviricetes|g__Moineauvirus|s__Streptococcus phage 128	Streptococcus phage 128	27	1	571	1	3	9	13	2	32	1	0	0	1	0	3	4	0	0	0	0	0	0	0	0	5	2	12	3	3	1	0	53	0	1	0	0	2	0	0	0	2	0	1	37	3	0	1	0
d__Viruses|k__Heunggongvirae|p__Uroviricota|c__Caudoviricetes|g__Lederbergvirus|s__Salmonella phage epsilon34	Salmonella phage epsilon34	0	2	0	1	226	0	32	0	6	0	0	4	0	0	0	9	0	0	3	0	0	2	0	0	17	0	17	0	2	0	27	125	54	0	6	22	0	0	0	79	5	0	0	0	1	6	0	0
d__Viruses|k__Heunggongvirae|p__Uroviricota|c__Caudoviricetes|g__Wanchaivirus|s__Wanchaivirus HK106	Wanchaivirus HK106	0	5	60	3	497	0	21	3	4	5	0	19	0	0	0	23	0	1	0	6	0	19	0	2	94	0	18	0	0	7	365	11	35	25	5	36	0	1	0	25	0	0	0	0	0	4	0	0
d__Viruses|k__Heunggongvirae|p__Uroviricota|c__Caudoviricetes|f__Herelleviridae|g__Watanabevirus|s__Watanabevirus wv3521	Watanabevirus wv3521	0	2	2	7	10	10	17	0	15	20	1	5	13	4	4	0	0	7	5	0	0	5	4	2	1	1	1	1	7	0	2	11	1	2	0	0	0	3	4	0	1	8	1	1	19	0	1	2
d__Viruses|k__Heunggongvirae|p__Uroviricota|c__Caudoviricetes|g__Lederbergvirus|s__Enterobacteria phage IME10	Enterobacteria phage IME10	0	6	4	1	521	0	77	15	3	30	0	11	0	0	0	4	0	0	7	18	0	7	0	1	28	0	27	0	0	3	223	53	158	37	15	16	0	0	0	42	2	0	3	3	3	93	1	0
d__Viruses|k__Heunggongvirae|p__Uroviricota|c__Caudoviricetes|g__Lughvirus|s__Lughvirus lugh	Lughvirus lugh	0	618	0	10	0	0	0	0	0	0	521	0	201	324	5	82	6	87	12	79	61	165	512	24	5	0	0	0	0	0	0	0	0	1	0	8	0	94	65	0	2	251	13	72	736	136	24	35
d__Viruses|k__Heunggongvirae|p__Uroviricota|c__Caudoviricetes|g__Lederbergvirus|s__Lederbergvirus HK620	Lederbergvirus HK620	0	2	0	1	2694	0	33	16	2	0	0	5	5	0	0	1	0	2	12	5	0	4	1	1	6	0	73	2	0	0	82	232	41	2	26	25	0	0	3	116	0	0	0	0	0	15	0	0
d__Viruses|k__Heunggongvirae|p__Uroviricota|c__Caudoviricetes|g__Taranisvirus|s__Taranisvirus taranis	Taranisvirus taranis	0	613	0	10	0	0	0	0	0	0	878	0	300	441	9	0	0	1142	151	263	111	122	1906	177	0	0	0	0	0	0	0	0	0	0	0	315	1969	44	259	0	193	823	0	358	2577	67	11	60
d__Viruses|k__Heunggongvirae|p__Uroviricota|c__Caudoviricetes|g__Oslovirus|s__Oslovirus TL2011	Oslovirus TL2011	0	52	27	10	36	0	80	29	74	19	0	7	40	0	0	20	42	36	4	7	0	1	1	35	3	1	44	29	0	21	33	67	86	108	9	31	11	4	12	60	19	0	0	445	13	6	0	0
d__Viruses|k__Heunggongvirae|p__Uroviricota|c__Caudoviricetes|o__Crassvirales|f__Intestiviridae|g__Fohxhuevirus|s__Fohxhuevirus gastrointestinalis	Fohxhuevirus gastrointestinalis	0	22	0	0	0	0	0	0	0	0	154	7	39	95	3	0	2187	40	22	150	14	29	72	1	0	0	0	0	0	13	1	0	0	52	0	0	5	116	163	22	39	4	159	0	0	9	3	89
d__Viruses|k__Heunggongvirae|p__Uroviricota|c__Caudoviricetes|g__Erskinevirus|s__Erskinevirus asesino	Erskinevirus asesino	23	53	0	6	0	6	1	0	1	6	5	3	2	6	0	3	33	3	3	1	4	11	7	0	3	0	0	3	25	46	0	4	15	8	2	4	0	11	0	38	2	6	3	12	4	26	2	0
d__Viruses|k__Heunggongvirae|p__Uroviricota|c__Caudoviricetes|f__Peduoviridae|g__Peduovirus|s__Peduovirus P24A7b	Peduovirus P24A7b	0	2	0	0	42	0	9	4	452	95	0	3	0	0	0	34	0	16	0	9	0	0	0	17	229	3	87	88	0	31	0	56	9	395	24	29	3	8	1	34	1	0	1	0	79	4	0	0
d__Viruses|k__Loebvirae|p__Hofneiviricota|c__Faserviricetes|o__Tubulavirales|f__Inoviridae|g__Infulavirus|s__Infulavirus If1	Infulavirus If1	0	120	22	16	0	0	71	9	93	29	0	30	88	0	0	24	57	24	5	8	0	3	0	6	5	0	119	117	0	24	182	124	102	323	9	11	19	1	11	62	0	1	0	251	16	20	0	0
d__Viruses|k__Heunggongvirae|p__Uroviricota|c__Caudoviricetes|g__Lederbergvirus|s__Lederbergvirus Sf6	Lederbergvirus Sf6	0	67	49	13	543	0	364	22	25	37	0	26	83	0	0	8	2	6	16	2	1	7	0	18	39	1	104	49	0	41	179	419	638	134	26	13	6	0	6	335	0	0	1	0	2	11	0	0
d__Viruses|k__Heunggongvirae|p__Uroviricota|c__Caudoviricetes|g__Lederbergvirus|s__Salmonella phage SEN22	Salmonella phage SEN22	59	98	315	22	128	116	548	38	239	42	0	32	70	0	0	141	40	26	1	2	0	12	0	43	315	0	183	169	129	39	259	482	935	712	10	150	76	19	10	252	9	9	4	89	0	25	3	0
d__Viruses|k__Heunggongvirae|p__Uroviricota|c__Caudoviricetes|f__Herelleviridae|g__Matervirus|s__Matervirus mater	Matervirus mater	0	73	5	9	0	32	16	5	23	47	7	5	80	17	5	23	21	10	12	6	6	13	24	34	12	0	0	139	0	86	15	5	7	0	0	42	14	4	4	31	129	22	38	204	57	13	6	6
d__Viruses|k__Heunggongvirae|p__Uroviricota|c__Caudoviricetes|g__Alegriavirus|s__Alegriavirus av2B8	Alegriavirus av2B8	0	243	42	32	360	0	229	17	331	51	0	267	146	0	2	458	415	169	1	145	1	11	0	219	304	10	208	161	1	392	624	292	436	948	21	97	27	29	180	181	41	0	7	2117	41	29	0	0
d__Viruses|k__Heunggongvirae|p__Uroviricota|c__Caudoviricetes|g__Glaedevirus|s__Enterobacteria phage cdtI	Enterobacteria phage cdtI	0	1049	163	13	577	6	449	53	1417	107	0	160	730	0	7	240	220	265	18	320	1	17	0	190	3493	4	210	215	0	717	513	196	718	838	79	86	31	21	156	97	54	1	2	770	30	28	0	0
d__Viruses|k__Heunggongvirae|p__Uroviricota|c__Caudoviricetes|g__Punavirus|s__Punavirus P1	Punavirus P1	2	2030	989	6	128	166	336	133	2835	355	1	252	87	0	7	1866	20	195	8	28	24	8	60	326	2814	1	1033	1094	82	3	88	1112	700	16529	60	272	38	126	194	401	104	16	42	40	88	90	3	0
d__Viruses|k__Heunggongvirae|p__Uroviricota|c__Caudoviricetes|g__Punavirus|s__Punavirus RCS47	Punavirus RCS47	1433	1076	230	74	354	1743	562	230	1034	194	0	326	290	0	18	1443	189	400	21	17	17	52	4	166	943	23	849	1505	1480	49	1247	1184	1058	3281	90	621	73	91	154	676	195	58	9	598	128	313	26	0
d__Viruses|k__Heunggongvirae|p__Uroviricota|c__Caudoviricetes|g__Nesevirus|s__Nesevirus ev243	Nesevirus ev243	0	160	173	38	664	0	110	217	367	42	0	265	133	0	4	369	34	48	2	39	0	2	3	21	226	1	419	352	0	71	170	167	181	1028	65	38	21	32	15	152	49	0	8	213	79	12	0	0
[truncated: 66 more columns]

## Sheet: fungi
SampleID		elcho01	elcho02	elcho03	elcho04	elcho05	elcho06	elcho07	elcho08	elcho09	elcho10	elcho11	elcho12	elcho13	elcho14	elcho15	elcho16	elcho17	elcho18	elcho19	elcho20	elcho21	elcho22	elcho23	elcho24	elcho25	elcho26	elcho27	elcho28	elcho29	elcho30	elcho31	elcho32	elcho33	elcho34	elcho35	elcho36	elcho37	elcho38	elcho39	elcho40	elcho41	elcho42	elcho43	elcho44	elcho45	elcho46	elcho47	elcho48
Study		elcho	elcho	elcho	elcho	elcho	elcho	elcho	elcho	elcho	elcho	elcho	elcho	elcho	elcho	elcho	elcho	elcho	elcho	elcho	elcho	elcho	elcho	elcho	elcho	elcho	elcho	elcho	elcho	elcho	elcho	elcho	elcho	elcho	elcho	elcho	elcho	elcho	elcho	elcho	elcho	elcho	elcho	elcho	elcho	elcho	elcho	elcho	elcho
Age_days		35	35	56	60	100	149	164	166	214	217	245	279	308	311	332	356	367	405	436	441	549	571	594	617	22	47	118	147	160	205	228	240	250	285	329	333	346	374	380	382	431	462	463	476	476	511	511	537
Age_cat		age0	age0	age0	age0	age0	age0	age1	age1	age1	age1	age1	age1	age2	age2	age2	age2	age2	age2	age2	age2	age3	age3	age3	age3	age0	age0	age0	age0	age1	age1	age1	age1	age1	age1	age2	age2	age2	age2	age2	age2	age2	age3	age3	age3	age3	age3	age3	age3
Sex		F	F	F	F	F	F	F	F	F	F	F	F	F	F	F	F	F	F	F	F	F	F	F	F	M	M	M	M	M	M	M	M	M	M	M	M	M	M	M	M	M	M	M	M	M	M	M	M
																					ELCHO
s	species	elcho01	elcho02	elcho03	elcho04	elcho05	elcho06	elcho07	elcho08	elcho09	elcho10	elcho11	elcho12	elcho13	elcho14	elcho15	elcho16	elcho17	elcho18	elcho19	elcho20	elcho21	elcho22	elcho23	elcho24	elcho25	elcho26	elcho27	elcho28	elcho29	elcho30	elcho31	elcho32	elcho33	elcho34	elcho35	elcho36	elcho37	elcho38	elcho39	elcho40	elcho41	elcho42	elcho43	elcho44	elcho45	elcho46	elcho47	elcho48
d__Eukaryota|k__Fungi|p__Ascomycota|c__Eurotiomycetes|o__Eurotiales|f__Aspergillaceae|g__Penicillium|s__Penicillium rubens	Penicillium rubens	4	10	3	5	2	5	5	4	5	10	16	2	8	6	40	8	1	20	13	11	16	135	5	3	7	4	5	7	13	32	1	5	3	2	4	2	6	14	8	3	16	3	26	5	5	30	3	6
d__Eukaryota|k__Fungi|p__Ascomycota|c__Saccharomycetes|o__Saccharomycetales|f__Debaryomycetaceae|g__Candida|s__Candida albicans	Candida albicans	197222	45	26075	24	5	0	104	0	1	73	1	9	35	1	2	13	0	13	0	2	0	2	0	73	245	2	298	623	96	0	104	377	17	240	0	2	0	10	1	0	25	1	0	59	255	12	7	0
d__Eukaryota|k__Fungi|p__Ascomycota|c__Sordariomycetes|o__Hypocreales|f__Clavicipitaceae|g__Ustilaginoidea|s__Ustilaginoidea virens	Ustilaginoidea virens	2	5	0	0	0	1	3	0	1	4	33	5	6	9	23	4	3	11	10	81	4	14	8	1	0	5	113	78	25	7	2	0	2	0	0	0	2	22	26	16	17	1	2	0	2	0	2	22
d__Eukaryota|k__Fungi|p__Ascomycota|c__Saccharomycetes|o__Saccharomycetales|f__Dipodascaceae|g__Yarrowia|s__Yarrowia lipolytica	Yarrowia lipolytica	1	1	1	2	0	2	1	0	7	4	21	5	10	12	100	16	0	0	6	0	5	9	2	1	0	0	0	8	0	4	3	9	2	0	1	1	3	9	2	2	4	11	5	0	12	5	0	8
non-sig
d__Eukaryota|k__Fungi|p__Basidiomycota|c__Malasseziomycetes|o__Malasseziales|f__Malasseziaceae|g__Malassezia|s__Malassezia restricta	Malassezia restricta	8	0	65	2	20	2	11	10	1	0	0	5	1	30	1	1	7	0	0	2	0	0	2	3	16	6	9	28	0	4	0	3	7	0	4	0	0	4	0	0	7	7	2	0	1	5	0	0
d__Eukaryota|k__Fungi|p__Ascomycota|c__Eurotiomycetes|o__Eurotiales|f__Aspergillaceae|g__Aspergillus|s__Aspergillus puulaauensis	Aspergillus puulaauensis	1	10	1	2	0	0	7	4	9	6	1	1	3	0	7	22	0	11	7	1	3	11	2	4	0	2	8	1	4	2	8	4	8	0	0	1	4	27	1	3	2	0	18	2	17	13	40	21
d__Eukaryota|k__Fungi|p__Ascomycota|c__Saccharomycetes|o__Saccharomycetales|f__Saccharomycetaceae|g__Tetrapisispora|s__Tetrapisispora blattae	Tetrapisispora blattae	1	22	9	1	0	0	1	0	110	1	4	1	8	5	14	26	2	7	1	0	8	0	1	2	5	0	2	31	5	0	0	0	1	0	0	3	0	2	0	0	8	7	17	0	1	0	0	1
d__Eukaryota|k__Fungi|p__Ascomycota|c__Sordariomycetes|o__Hypocreales|f__Ophiocordycipitaceae|g__Purpureocillium|s__Purpureocillium takamizusanense	Purpureocillium takamizusanense	6	21	0	0	0	0	0	2	70	8	1	1	11	6	19	24	3	7	8	0	9	3	3	14	0	4	1	7	19	4	2	2	1	0	0	6	2	3	1	2	12	8	0	0	8	6	6	0
d__Eukaryota|k__Fungi|p__Ascomycota|c__Sordariomycetes|o__Sordariales|f__Chaetomiaceae|g__Thermothielavioides|s__Thermothielavioides terrestris	Thermothielavioides terrestris	6	2	2	0	0	2	1	1	8	32	3	7	2	6	7	39	1	48	1	17	10	6	6	0	0	10	4	0	0	2	3	0	3	0	0	3	0	3	6	17	19	8	4	1	2	3	2	5
d__Eukaryota|k__Fungi|p__Ascomycota|c__Saccharomycetes|o__Saccharomycetales|f__Saccharomycetaceae|g__Kluyveromyces|s__Kluyveromyces marxianus	Kluyveromyces marxianus	2	3	1	0	0	0	2	130	1	0	1	2	3	21	0	0	3	0	0	0	0	0	0	0	0	1	1	13	0	0	0	1	3	0	0	0	0	3	0	0	0	7	28	1	0	21	4	11
d__Eukaryota|k__Fungi|p__Ascomycota|c__Saccharomycetes|o__Saccharomycetales|f__Trichomonascaceae|g__Sugiyamaella|s__Sugiyamaella lignohabitans	Sugiyamaella lignohabitans	1	2	2	1	1	4	0	0	4	16	8	3	6	6	5	4	4	9	3	5	22	2	18	13	0	2	0	1	21	0	1	0	0	0	0	0	0	2	1	1	0	2	2	0	8	3	0	2
d__Eukaryota|k__Fungi|p__Ascomycota|c__Saccharomycetes|o__Saccharomycetales|f__Saccharomycetaceae|g__Zygosaccharomyces|s__Zygosaccharomyces rouxii	Zygosaccharomyces rouxii	2	0	2	0	0	0	2	0	0	0	3	4	1	6	0	0	0	0	2	5	9	0	0	1	0	0	0	24	0	0	0	1	0	1	0	0	1	5	0	1	1	0	26	0	0	3	0	2
d__Eukaryota|k__Fungi|p__Basidiomycota|c__Tremellomycetes|o__Tremellales|f__Cryptococcaceae|g__Cryptococcus|s__Cryptococcus neoformans	Cryptococcus neoformans	0	0	0	0	0	0	0	0	0	0	16	1	3	6	3	1	1	1	1	22	3	18	6	5	0	0	0	2	0	0	0	0	0	0	0	1	1	0	1	6	8	0	2	0	0	0	0	0
d__Eukaryota|k__Fungi|p__Ascomycota|c__Eurotiomycetes|o__Eurotiales|f__Aspergillaceae|g__Aspergillus|s__Aspergillus luchuensis	Aspergillus luchuensis	3	1	0	1	0	4	1	1	0	1	33	6	4	10	15	0	0	17	0	129	15	37	23	0	0	3	2	1	0	2	3	1	4	0	0	1	2	0	0	17	5	3	14	0	1	50	136	4
d__Eukaryota|k__Fungi|p__Ascomycota|c__Saccharomycetes|o__Saccharomycetales|f__Debaryomycetaceae|g__Candida|s__Candida dubliniensis	Candida dubliniensis	1277	1	182	1	0	3	2	0	0	8	44	2	0	0	0	0	0	0	0	2	2	0	3	0	4	3	2	25	1	0	7	1	3	7	0	0	0	7	0	0	1	1	4	0	2	2	0	3
d__Eukaryota|k__Fungi|p__Ascomycota|c__Eurotiomycetes|o__Eurotiales|f__Trichocomaceae|g__Talaromyces|s__Talaromyces rugulosus	Talaromyces rugulosus	0	5	0	0	0	0	0	1	1	0	1	2	1	12	3	0	0	2	0	0	2	11	2	2	0	4	0	29	0	0	0	0	5	0	0	0	1	1	7	0	5	0	3	0	1	44	130	1
d__Eukaryota|k__Fungi|p__Ascomycota|c__Saccharomycetes|o__Saccharomycetales|f__Pichiaceae|g__Pichia|s__Pichia kudriavzevii	Pichia kudriavzevii	3	0	3	4	0	0	1	0	2	0	5	4	2	1	1	1	0	2	0	6	2	0	9	0	1	0	1	9	0	0	0	0	2894	0	0	0	0	4	5	2	0	3	5	0	0	0	3	3
d__Eukaryota|k__Fungi|p__Ascomycota|c__Schizosaccharomycetes|o__Schizosaccharomycetales|f__Schizosaccharomycetaceae|g__Schizosaccharomyces|s__Schizosaccharomyces pombe	Schizosaccharomyces pombe	2	9	0	0	0	1	0	0	0	4	3	5	0	11	5	0	5	0	4	2	0	0	3	1	0	1	0	1	0	0	2	5	3	2	0	2	2	1	1	0	3	7	0	5	4	2	3	0
d__Eukaryota|k__Fungi|p__Ascomycota|c__Sordariomycetes|o__Sordariales|f__Chaetomiaceae|g__Thermothelomyces|s__Thermothelomyces thermophilus	Thermothelomyces thermophilus	0	4	0	0	0	2	0	0	11	2	2	5	2	7	3	8	3	7	0	1	4	10	0	3	2	4	1	1	16	2	0	0	1	1	1	2	1	3	1	0	4	3	4	0	1	1	1	5
d__Eukaryota|k__Fungi|p__Ascomycota|c__Saccharomycetes|o__Saccharomycetales|f__Saccharomycetaceae|g__Saccharomyces|s__Saccharomyces cerevisiae	Saccharomyces cerevisiae	1	44	0	8	0	4	0	0	103	2	1	1	71	7	10	6	0	1	0	0	0	1	0	0	0	0	0	9	0	0	41	1	1	0	0	0	0	9	0	0	1	0	23	0	117	24	5	1
d__Eukaryota|k__Fungi|p__Ascomycota|c__Saccharomycetes|o__Saccharomycetales|f__Saccharomycetaceae|g__Kazachstania|s__Kazachstania naganishii	Kazachstania naganishii	0	0	0	2	0	0	0	0	0	0	9	0	2	5	0	0	0	1	0	0	0	6	4	1	0	1	0	7	0	0	0	0	0	0	0	0	1	12	0	1	0	9	19	1	0	0	2	5
d__Eukaryota|k__Fungi|p__Ascomycota|c__Eurotiomycetes|o__Eurotiales|f__Aspergillaceae|g__Aspergillus|s__Aspergillus flavus	Aspergillus flavus	2	5	0	0	0	0	0	0	0	8	2	1	2	0	0	0	1	4	0	3	4	4574	0	0	13	0	0	10	1	0	2	1	7	0	0	1	2	0	3	0	2	6	5	0	0	21	0	8
d__Eukaryota|k__Fungi|p__Ascomycota|c__Leotiomycetes|o__Helotiales|f__Sclerotiniaceae|g__Botrytis|s__Botrytis cinerea	Botrytis cinerea	6	5	2	0	0	9	8	1	0	0	7	15	34	10	2	0	11	14	3	0	0	7	10	1	1	17	0	4	0	4	0	6	11	0	0	5	0	5	0	2	21	1	3	0	0	1	1	10
d__Eukaryota|k__Fungi|p__Ascomycota|c__Saccharomycetes|o__Saccharomycetales|f__Saccharomycetaceae|g__Tetrapisispora|s__Tetrapisispora phaffii	Tetrapisispora phaffii	2	0	0	0	0	5	0	0	0	0	6	4	5	6	4	0	0	0	3	2	2	0	32	0	1	2	1	14	0	1	0	1	0	0	0	0	0	7	1	0	0	0	9	1	0	0	6	2
d__Eukaryota|k__Fungi|p__Ascomycota|c__Saccharomycetes|o__Saccharomycetales|f__Saccharomycetaceae|g__Kluyveromyces|s__Kluyveromyces lactis	Kluyveromyces lactis	0	11	0	0	0	0	0	0	0	0	13	0	12	0	0	0	0	0	0	0	0	0	0	0	0	0	1	8	0	0	0	0	0	0	0	0	0	5	0	0	0	0	17	0	0	0	0	0
d__Eukaryota|k__Fungi|p__Ascomycota|c__Saccharomycetes|o__Saccharomycetales|f__Saccharomycetaceae|g__Eremothecium|s__Eremothecium cymbalariae	Eremothecium cymbalariae	5	0	0	0	0	0	0	0	0	0	2	0	4	0	34	0	0	0	4	6	5	0	2	0	0	0	0	9	0	0	1	0	0	1	0	13	0	1	1	3	0	4	0	0	1	0	1	0
d__Eukaryota|k__Fungi|p__Ascomycota|c__Saccharomycetes|o__Saccharomycetales|f__Saccharomycetaceae|g__Eremothecium|s__Eremothecium gossypii	Eremothecium gossypii	1	0	0	0	0	0	0	0	1	1	2	1	0	0	0	0	1	0	0	1	2	1	2	0	0	0	0	25	5	2	2	1	0	0	0	0	0	0	0	0	1	0	2	0	0	1	0	1
d__Eukaryota|k__Fungi|p__Ascomycota|c__Saccharomycetes|o__Saccharomycetales|f__Debaryomycetaceae|g__Scheffersomyces|s__Scheffersomyces stipitis	Scheffersomyces stipitis	2	3	1	0	0	0	1	0	0	1	2	0	8	6	0	3	0	0	1	0	0	2	1	2	0	0	0	0	0	0	0	0	0	0	0	3	0	0	0	0	0	0	7	0	0	2	0	1
d__Eukaryota|k__Fungi|p__Ascomycota|c__Saccharomycetes|o__Saccharomycetales|f__Saccharomycetaceae|g__Naumovozyma|s__Naumovozyma castellii	Naumovozyma castellii	2	1	10	5	0	1	33	0	0	4	0	0	0	9	4	5	0	3	0	1	1	4	0	0	0	3	0	9	0	0	1	1	6	1	0	2	4	19	1	0	2	0	15	2	3	2	2	6
d__Eukaryota|k__Fungi|p__Ascomycota|c__Saccharomycetes|o__Saccharomycetales|f__Saccharomycetaceae|g__Nakaseomyces|s__[Candida] glabrata	[Candida] glabrata	18	8	3	1	1	0	0	0	0	1	0	1	2	1	1	0	1	1	0	0	0	0	1	0	0	0	0	2	0	1	0	0	1	0	0	1	0	0	1	0	0	0	6	0	0	1	2	0
d__Eukaryota|k__Fungi|p__Ascomycota|c__Saccharomycetes|o__Saccharomycetales|f__Saccharomycetaceae|g__Naumovozyma|s__Naumovozyma dairenensis	Naumovozyma dairenensis	0	2	0	6	0	0	0	0	1	2	3	0	5	15	0	3	4	0	0	0	0	4	0	1	1	2	0	17	0	0	0	0	0	0	0	1	3	1	4	0	2	1	14	1	3	2	1	5
[truncated: 65 more columns]

## Sheet: eukaryotes
Taxa remaining after blast check		elcho25	elcho01	elcho02	elcho26	elcho03	elcho04	elcho05	elcho27	elcho28	elcho06	elcho29	elcho07	elcho08	elcho30	elcho09	elcho10	elcho31	elcho32	elcho11	elcho33	elcho12	elcho34	elcho13	elcho14	elcho35	elcho15	elcho36	elcho37	elcho16	elcho17	elcho38	elcho39	elcho40	elcho18	elcho41	elcho19	elcho20	elcho42	elcho43	elcho44	elcho45	elcho46	elcho47	elcho48	elcho21	elcho49	elcho50	elcho22
total count > 20 only		elcho	elcho	elcho	elcho	elcho	elcho	elcho	elcho	elcho	elcho	elcho	elcho	elcho	elcho	elcho	elcho	elcho	elcho	elcho	elcho	elcho	elcho	elcho	elcho	elcho	elcho	elcho	elcho	elcho	elcho	elcho	elcho	elcho	elcho	elcho	elcho	elcho	elcho	elcho	elcho	elcho	elcho	elcho	elcho	elcho	elcho	elcho	elcho
		22	35	35	47	56	60	100	118	147	149	160	164	166	205	214	217	228	240	245	250	279	285	308	311	329	332	333	346	356	367	374	380	382	405	431	436	441	462	463	476	476	511	511	537	549	566	567	571
		age0	age0	age0	age0	age0	age0	age0	age0	age0	age0	age1	age1	age1	age1	age1	age1	age1	age1	age1	age1	age1	age1	age2	age2	age2	age2	age2	age2	age2	age2	age2	age2	age2	age2	age2	age2	age2	age3	age3	age3	age3	age3	age3	age3	age3	age3	age3	age3
		M	F	F	M	F	F	F	M	M	F	M	F	F	M	F	F	M	M	F	M	F	M	F	F	M	F	M	M	F	F	M	M	M	F	M	F	F	M	M	M	M	M	M	M	F	M	M	F
																									ELCHO
		22	35	35	47	56	60	100	118	147	149	160	164	166	205	214	217	228	240	245	250	279	285	308	311	329	332	333	346	356	367	374	380	382	405	431	436	441	462	463	476	476	511	511	537	549	566	567	571
d__Eukaryota|k__Metazoa|p__Chordata|c__Mammalia|f__Bovidae|g__Bos|s__Bos taurus	Bos taurus	0	0	0	0	0	0	0	0	0	0	0	0	0	0	0	0	0	177	0	0	0	0	0	0	0	0	604	0	0	0	1	0	0	0	0	0	0	0	3	0	0	0	0	0	4	2	4	0
d__Eukaryota|k__Viridiplantae|p__Streptophyta|o__Sapindales|f__Rutaceae|g__Citrus|s__Citrus sinensis	Citrus sinensis	0	0	0	0	5	0	0	0	0	0	0	0	0	0	0	2	0	0	0	0	0	0	0	0	0	0	0	0	0	0	0	104	0	0	0	0	0	2	0	0	0	0	0	0	0	0	0	0
d__Eukaryota|k__Metazoa|p__Arthropoda|c__Arachnida|o__Sarcoptiformes|f__Pyroglyphidae|g__Dermatophagoides|s__Dermatophagoides pteronyssinus	Dermatophagoides pteronyssinus	0	2	0	0	0	0	0	0	6	0	0	0	0	0	0	37	0	0	0	0	0	0	0	0	0	0	0	0	0	0	0	0	0	0	0	0	0	0	0	0	0	0	0	0	0	0	0	0
d__Eukaryota|k__Viridiplantae|p__Streptophyta|o__Rosales|f__Rosaceae|g__Fragaria|s__Fragaria vesca	Fragaria vesca	0	0	0	0	0	0	0	0	0	0	0	0	0	0	0	0	0	0	0	0	0	0	0	0	0	0	0	0	0	0	0	0	0	0	0	0	0	0	0	0	0	0	0	0	0	0	0	0
d__Eukaryota|k__Metazoa|p__Chordata|c__Aves|o__Galliformes|f__Phasianidae|g__Gallus|s__Gallus gallus	Gallus gallus	2	0	0	0	0	0	0	0	0	0	0	0	0	0	1	3	4	48	0	0	0	0	0	0	0	1	0	0	0	0	0	0	0	0	0	0	2	0	0	0	0	0	0	0	0	0	0	0
d__Eukaryota|k__Viridiplantae|p__Streptophyta|o__Asterales|f__Asteraceae|g__Helianthus|s__Helianthus annuus	Helianthus annuus	0	0	0	0	0	0	0	0	0	0	0	0	0	0	0	0	0	0	0	0	0	0	0	0	0	0	0	0	0	0	0	0	0	0	0	0	0	0	0	0	0	0	0	0	0	0	0	0
d__Eukaryota|k__Metazoa|p__Mollusca|c__Bivalvia|o__Pectinoida|f__Pectinidae|g__Mizuhopecten|s__Mizuhopecten yessoensis	Mizuhopecten yessoensis	2	9	0	836	0	0	0	1	0	1	0	0	0	2	0	0	1	191	0	569	52	0	2	0	0	0	12	0	0	0	0	0	11	0	77	0	0	0	0	2	0	0	0	0	0	4	0	0
d__Eukaryota|k__Viridiplantae|p__Streptophyta|c__Liliopsida|o__Zingiberales|f__Musaceae|g__Musa|s__Musa acuminata	Musa acuminata	0	0	26	0	0	0	0	0	0	0	0	0	0	0	0	0	0	0	0	0	0	0	5	0	0	0	0	0	0	0	0	0	0	0	41	0	0	0	0	16	30	1	0	0	0	0	0	0
d__Eukaryota|k__Viridiplantae|p__Streptophyta|o__Rosales|f__Rosaceae|g__Prunus|s__Prunus avium	Prunus avium	0	0	0	0	0	0	0	0	0	0	0	0	0	0	0	0	0	0	0	0	0	0	0	0	0	0	0	0	0	0	0	0	0	0	0	0	1	0	0	0	0	0	0	0	0	0	0	0
d__Eukaryota|k__Viridiplantae|p__Streptophyta|o__Caryophyllales|f__Chenopodiaceae|g__Spinacia|s__Spinacia oleracea	Spinacia oleracea	0	0	0	0	0	0	0	0	0	0	0	0	0	0	0	0	0	0	0	0	0	0	0	0	0	0	0	0	0	0	0	0	0	0	0	0	0	0	0	0	0	0	0	0	0	0	0	0
d__Eukaryota|k__Metazoa|p__Chordata|c__Mammalia|f__Suidae|g__Sus|s__Sus scrofa	Sus scrofa	0	0	0	0	0	0	6	0	0	0	0	0	1	0	0	0	0	0	0	0	0	0	0	0	0	0	0	0	2	0	0	0	1	0	0	0	2	0	0	3	2	0	0	0	0	4	0	3
d__Eukaryota|k__Viridiplantae|p__Streptophyta|o__Vitales|f__Vitaceae|g__Vitis|s__Vitis vinifera	Vitis vinifera	0	0	0	0	0	0	0	0	0	0	0	0	0	0	0	0	0	0	0	0	0	0	0	0	0	0	0	0	0	0	0	2	0	0	0	0	0	0	0	0	4	0	0	0	0	0	0	0
d__Eukaryota|k__Viridiplantae|p__Streptophyta|c__Liliopsida|o__Poales|f__Poaceae|g__Zea|s__Zea mays	Zea mays	0	0	0	0	0	0	2	0	0	0	0	0	0	0	0	0	0	0	3	0	0	0	1	0	0	0	0	0	0	0	0	0	0	0	0	0	0	0	0	1	0	0	0	0	0	2	0	0
d__Eukaryota|p__Apicomplexa|c__Conoidasida|o__Eucoccidiorida|f__Cryptosporidiidae|g__Cryptosporidium|s__Cryptosporidium parvum	Cryptosporidium parvum	0	0	0	0	0	0	0	0	19160	0	0	0	0	0	0	0	0	0	0	0	0	0	0	0	0	0	0	0	0	0	0	0	0	0	0	0	0	0	0	0	0	0	2	0	0	0	0	0
d__Eukaryota|g__Blastocystis|s__Blastocystis hominis	Blastocystis hominis	0	0	0	0	0	0	0	0	0	0	0	0	0	0	0	0	0	0	0	0	0	0	0	48	0	0	0	0	0	0	0	0	0	0	0	8	0	0	0	0	0	0	0	0	0	0	0	1
Elcho total count	22190
Endia total count	10674
		elcho	elcho	elcho	elcho	elcho	elcho	elcho	elcho	elcho	elcho	elcho	elcho	elcho	elcho	elcho	elcho	elcho	elcho	elcho	elcho	elcho	elcho	elcho	elcho	elcho	elcho	elcho	elcho	elcho	elcho	elcho	elcho	elcho	elcho	elcho	elcho	elcho	elcho	elcho	elcho	elcho	elcho	elcho	elcho	elcho	elcho	elcho	elcho
	Bos taurus	0	0	0	0	0	0	0	0	0	0	0	0	0	0	0	0	0	177	0	0	0	0	0	0	0	0	604	0	0	0	1	0	0	0	0	0	0	0	3	0	0	0	0	0	4	2	4	0
	Citrus sinensis	0	0	0	0	5	0	0	0	0	0	0	0	0	0	0	2	0	0	0	0	0	0	0	0	0	0	0	0	0	0	0	104	0	0	0	0	0	2	0	0	0	0	0	0	0	0	0	0
	Dermatophagoides pteronyssinus	0	2	0	0	0	0	0	0	6	0	0	0	0	0	0	37	0	0	0	0	0	0	0	0	0	0	0	0	0	0	0	0	0	0	0	0	0	0	0	0	0	0	0	0	0	0	0	0
	Fragaria vesca	0	0	0	0	0	0	0	0	0	0	0	0	0	0	0	0	0	0	0	0	0	0	0	0	0	0	0	0	0	0	0	0	0	0	0	0	0	0	0	0	0	0	0	0	0	0	0	0
	Gallus gallus	2	0	0	0	0	0	0	0	0	0	0	0	0	0	1	3	4	48	0	0	0	0	0	0	0	1	0	0	0	0	0	0	0	0	0	0	2	0	0	0	0	0	0	0	0	0	0	0
	Helianthus annuus	0	0	0	0	0	0	0	0	0	0	0	0	0	0	0	0	0	0	0	0	0	0	0	0	0	0	0	0	0	0	0	0	0	0	0	0	0	0	0	0	0	0	0	0	0	0	0	0
	Mizuhopecten yessoensis	2	9	0	836	0	0	0	1	0	1	0	0	0	2	0	0	1	191	0	569	52	0	2	0	0	0	12	0	0	0	0	0	11	0	77	0	0	0	0	2	0	0	0	0	0	4	0	0
	Musa acuminata	0	0	26	0	0	0	0	0	0	0	0	0	0	0	0	0	0	0	0	0	0	0	5	0	0	0	0	0	0	0	0	0	0	0	41	0	0	0	0	16	30	1	0	0	0	0	0	0
	Prunus avium	0	0	0	0	0	0	0	0	0	0	0	0	0	0	0	0	0	0	0	0	0	0	0	0	0	0	0	0	0	0	0	0	0	0	0	0	1	0	0	0	0	0	0	0	0	0	0	0
	Spinacia oleracea	0	0	0	0	0	0	0	0	0	0	0	0	0	0	0	0	0	0	0	0	0	0	0	0	0	0	0	0	0	0	0	0	0	0	0	0	0	0	0	0	0	0	0	0	0	0	0	0
	Sus scrofa	0	0	0	0	0	0	6	0	0	0	0	0	1	0	0	0	0	0	0	0	0	0	0	0	0	0	0	0	2	0	0	0	1	0	0	0	2	0	0	3	2	0	0	0	0	4	0	3
	Vitis vinifera	0	0	0	0	0	0	0	0	0	0	0	0	0	0	0	0	0	0	0	0	0	0	0	0	0	0	0	0	0	0	0	2	0	0	0	0	0	0	0	0	4	0	0	0	0	0	0	0
	Zea mays	0	0	0	0	0	0	2	0	0	0	0	0	0	0	0	0	0	0	3	0	0	0	1	0	0	0	0	0	0	0	0	0	0	0	0	0	0	0	0	1	0	0	0	0	0	2	0	0
	Cryptosporidium parvum	0	0	0	0	0	0	0	0	19160	0	0	0	0	0	0	0	0	0	0	0	0	0	0	0	0	0	0	0	0	0	0	0	0	0	0	0	0	0	0	0	0	0	2	0	0	0	0	0
	Blastocystis hominis	0	0	0	0	0	0	0	0	0	0	0	0	0	0	0	0	0	0	0	0	0	0	0	48	0	0	0	0	0	0	0	0	0	0	0	8	0	0	0	0	0	0	0	0	0	0	0	1
[truncated: 69 more columns]

## Sheet: eukaryotes raw data
s		elcho01.fasta_kraken	elcho02.fasta_kraken	elcho03.fasta_kraken	elcho04.fasta_kraken	elcho05.fasta_kraken	elcho06.fasta_kraken	elcho07.fasta_kraken	elcho08.fasta_kraken	elcho09.fasta_kraken	elcho10.fasta_kraken	elcho11.fasta_kraken	elcho12.fasta_kraken	elcho13.fasta_kraken	elcho14.fasta_kraken	elcho15.fasta_kraken	elcho16.fasta_kraken	elcho17.fasta_kraken	elcho18.fasta_kraken	elcho19.fasta_kraken	elcho20.fasta_kraken	elcho21.fasta_kraken	elcho22.fasta_kraken	elcho23.fasta_kraken	elcho24.fasta_kraken	elcho25.fasta_kraken	elcho26.fasta_kraken	elcho27.fasta_kraken	elcho28.fasta_kraken	elcho29.fasta_kraken	elcho30.fasta_kraken	elcho31.fasta_kraken	elcho32.fasta_kraken	elcho33.fasta_kraken	elcho34.fasta_kraken	elcho35.fasta_kraken	elcho36.fasta_kraken	elcho37.fasta_kraken	elcho38.fasta_kraken	elcho39.fasta_kraken	elcho40.fasta_kraken	elcho41.fasta_kraken	elcho42.fasta_kraken	elcho43.fasta_kraken	elcho44.fasta_kraken	elcho45.fasta_kraken	elcho46.fasta_kraken	elcho47.fasta_kraken	elcho48.fasta_kraken
d__Eukaryota|c__Oomycetes|o__Peronosporales|f__Peronosporaceae|g__Plasmopara|s__Plasmopara halstedii	Plasmopara halstedii	0	0	0	0	0	0	0	0	0	0	0	0	0	0	0	0	0	0	0	0	0	0	0	0	0	0	0	0	0	0	0	0	0	0	0	0	0	0	0	0	0	0	0	0	0	0	0	0
d__Eukaryota|g__Blastocystis|s__Blastocystis hominis	Blastocystis hominis	0	0	0	0	0	0	0	0	0	0	0	0	0	48	0	0	0	0	8	0	0	1	0	0	0	0	0	0	0	0	0	0	0	0	0	0	0	0	0	0	0	0	0	0	0	0	0	0
d__Eukaryota|g__Blastocystis|s__Blastocystis sp. subtype 4	Blastocystis sp. subtype 4	0	0	0	0	0	0	0	0	0	0	0	0	0	5	0	0	0	0	3	0	0	0	0	0	0	0	0	0	0	0	0	0	0	0	0	0	0	3	0	0	0	0	0	0	0	0	0	0
d__Eukaryota|k__Metazoa|p__Arthropoda|c__Arachnida|o__Sarcoptiformes|f__Pyroglyphidae|g__Dermatophagoides|s__Dermatophagoides pteronyssinus	Dermatophagoides pteronyssinus	2	0	0	0	0	0	0	0	0	37	0	0	0	0	0	0	0	0	0	0	0	0	0	0	0	0	0	6	0	0	0	0	0	0	0	0	0	0	0	0	0	0	0	0	0	0	0	0
d__Eukaryota|k__Metazoa|p__Arthropoda|c__Insecta|o__Coleoptera|f__Curculionidae|g__Dendroctonus|s__Dendroctonus ponderosae	Dendroctonus ponderosae	0	0	0	0	0	0	0	0	0	0	0	0	0	0	0	0	0	0	0	0	0	0	0	0	3	0	0	0	0	0	0	0	0	0	0	0	0	0	0	0	0	0	0	0	0	0	0	0
d__Eukaryota|k__Metazoa|p__Arthropoda|c__Insecta|o__Diptera|f__Calliphoridae|g__Lucilia|s__Lucilia cuprina	Lucilia cuprina	0	0	0	4	0	0	0	86	386	1	0	0	0	0	0	82	0	0	0	0	0	0	0	0	0	0	0	0	0	10	1	0	3	0	0	0	0	0	0	54	0	0	0	0	1	0	0	0
d__Eukaryota|k__Metazoa|p__Arthropoda|c__Insecta|o__Diptera|f__Tephritidae|g__Rhagoletis|s__Rhagoletis zephyria	Rhagoletis zephyria	5	0	0	0	0	0	0	0	1	2	0	0	0	0	0	8	0	0	0	0	0	0	0	0	0	0	0	0	1	0	0	0	0	0	0	0	0	0	0	0	0	0	0	0	0	0	0	0
d__Eukaryota|k__Metazoa|p__Arthropoda|c__Insecta|o__Diptera|f__Tephritidae|g__Zeugodacus|s__Zeugodacus cucurbitae	Zeugodacus cucurbitae	0	60	0	0	0	101	4	4	19	0	0	0	9	0	0	0	0	0	0	0	0	0	0	0	0	0	0	3	0	0	0	11	3	0	0	0	0	0	0	0	0	0	0	0	0	0	0	0
d__Eukaryota|k__Metazoa|p__Arthropoda|c__Insecta|o__Hymenoptera|f__Agaonidae|g__Ceratosolen|s__Ceratosolen solmsi	Ceratosolen solmsi	0	0	0	0	0	0	0	0	1	3	0	0	0	0	0	0	0	0	0	0	0	0	0	0	0	0	0	0	2	0	0	0	0	0	0	0	0	0	5	0	0	0	0	0	0	0	0	0
d__Eukaryota|k__Metazoa|p__Arthropoda|c__Insecta|o__Hymenoptera|f__Formicidae|g__Wasmannia|s__Wasmannia auropunctata	Wasmannia auropunctata	0	0	0	0	0	0	0	0	0	0	0	0	0	0	0	0	0	0	0	0	0	0	0	0	2	0	0	0	0	0	0	0	0	0	0	0	0	0	0	0	0	0	0	0	0	0	0	0
d__Eukaryota|k__Metazoa|p__Arthropoda|c__Insecta|o__Lepidoptera|f__Noctuidae|g__Spodoptera|s__Spodoptera litura	Spodoptera litura	0	0	0	0	0	0	0	0	0	0	0	0	0	0	0	0	0	0	0	0	0	0	0	0	0	0	0	0	0	0	0	0	0	0	0	0	0	0	0	0	0	0	0	0	0	0	0	0
d__Eukaryota|k__Metazoa|p__Arthropoda|c__Insecta|o__Lepidoptera|f__Plutellidae|g__Plutella|s__Plutella xylostella	Plutella xylostella	0	0	0	0	0	0	0	0	0	0	0	0	0	0	0	0	0	0	0	0	0	0	0	0	6	0	0	0	0	0	0	0	0	0	0	0	0	0	0	0	0	0	0	0	0	3	0	0
d__Eukaryota|k__Metazoa|p__Arthropoda|c__Malacostraca|o__Decapoda|f__Penaeidae|g__Penaeus|s__Penaeus vannamei	Penaeus vannamei	0	0	0	0	0	0	0	0	0	0	0	0	0	0	0	0	0	0	0	0	0	0	0	0	0	0	0	0	0	0	0	2	0	0	0	0	0	0	0	0	0	0	0	0	0	0	0	0
d__Eukaryota|k__Metazoa|p__Arthropoda|c__Merostomata|o__Xiphosura|f__Limulidae|g__Limulus|s__Limulus polyphemus	Limulus polyphemus	0	0	0	0	0	0	0	0	0	0	0	0	0	4	0	0	0	0	4	0	1	0	0	0	0	0	0	0	0	0	0	0	0	0	0	0	0	0	0	0	0	0	0	0	0	0	0	0
d__Eukaryota|k__Metazoa|p__Chordata|c__Actinopteri|o__Clupeiformes|f__Clupeidae|g__Clupea|s__Clupea harengus	Clupea harengus	0	0	0	0	0	0	0	0	0	0	0	1	0	0	0	0	0	0	0	0	0	0	0	0	0	0	0	0	0	0	0	0	0	0	0	0	0	0	0	0	0	0	0	0	0	0	0	0
d__Eukaryota|k__Metazoa|p__Chordata|c__Actinopteri|o__Salmoniformes|f__Salmonidae|g__Salmo|s__Salmo salar	Salmo salar	34	2	139	0	6	39	24	0	1	1	1	82	0	0	0	2	0	0	0	2	0	1	0	0	0	24	115	0	0	2	0	99	29	3	0	22	12	0	0	6	39	0	0	9	2	2	0	0
d__Eukaryota|k__Metazoa|p__Chordata|c__Aves|o__Galliformes|f__Phasianidae|g__Gallus|s__Gallus gallus	Gallus gallus	0	0	0	0	0	0	0	0	1	3	0	0	0	0	1	0	0	0	0	2	0	0	8	0	2	0	0	0	0	0	4	48	0	0	0	0	0	0	0	0	0	0	0	0	0	0	0	0
d__Eukaryota|k__Metazoa|p__Chordata|c__Aves|o__Galliformes|f__Phasianidae|g__Meleagris|s__Meleagris gallopavo	Meleagris gallopavo	0	0	0	0	1	0	0	0	0	0	0	0	0	0	0	0	0	4	0	0	0	0	0	0	0	0	0	0	0	0	0	0	0	0	0	0	0	0	0	0	0	0	0	0	0	0	0	0
d__Eukaryota|k__Metazoa|p__Chordata|c__Mammalia|f__Bovidae|g__Bos|s__Bos taurus	Bos taurus	0	0	0	0	0	0	0	0	0	0	0	0	0	0	0	0	0	0	0	0	4	0	0	6	0	0	0	0	0	0	0	177	0	0	0	604	0	1	0	0	0	0	3	0	0	0	0	0
d__Eukaryota|k__Metazoa|p__Chordata|c__Mammalia|f__Bovidae|g__Capra|s__Capra hircus	Capra hircus	0	0	0	0	0	0	0	0	0	0	0	0	0	0	0	0	0	0	0	0	0	0	0	0	0	0	0	0	0	0	0	0	0	0	0	1	0	0	0	0	0	0	0	0	0	0	0	0
d__Eukaryota|k__Metazoa|p__Chordata|c__Mammalia|f__Suidae|g__Sus|s__Sus scrofa	Sus scrofa	0	0	0	0	6	0	0	1	0	0	0	0	0	0	0	2	0	0	0	2	0	3	0	0	0	0	0	0	0	0	0	0	0	0	0	0	0	0	0	1	0	0	0	3	2	0	0	0
d__Eukaryota|k__Metazoa|p__Chordata|c__Mammalia|o__Lagomorpha|f__Leporidae|g__Oryctolagus|s__Oryctolagus cuniculus	Oryctolagus cuniculus	0	0	0	0	0	0	0	0	0	0	0	0	0	0	0	0	0	0	0	0	0	0	0	0	0	0	0	0	0	0	0	0	0	0	0	1	0	0	0	0	0	0	0	0	0	0	0	0
d__Eukaryota|k__Metazoa|p__Chordata|c__Mammalia|o__Perissodactyla|f__Equidae|g__Equus|s__Equus caballus	Equus caballus	0	0	0	0	0	0	0	0	0	0	0	0	0	0	0	0	0	0	0	0	0	0	0	0	0	1	0	0	0	0	0	0	1	0	0	0	0	0	0	0	0	0	0	0	0	0	0	0
d__Eukaryota|k__Metazoa|p__Chordata|c__Mammalia|o__Rodentia|f__Muridae|g__Mus|s__Mus musculus	Mus musculus	0	0	0	0	0	0	0	0	0	0	0	0	0	0	0	0	0	0	0	0	0	0	0	0	0	0	0	0	0	0	0	0	0	0	0	0	0	0	0	0	0	0	0	0	0	0	0	0
d__Eukaryota|k__Metazoa|p__Chordata|o__Testudines|f__Emydidae|g__Chrysemys|s__Chrysemys picta	Chrysemys picta	1	0	0	0	0	1	3	0	0	0	0	20	0	0	0	0	1	0	0	0	2	0	0	0	0	23	0	0	0	0	0	5	2	0	0	1	0	0	0	0	0	0	0	0	0	0	0	0
d__Eukaryota|k__Metazoa|p__Cnidaria|c__Anthozoa|o__Actiniaria|f__Edwardsiidae|g__Nematostella|s__Nematostella vectensis	Nematostella vectensis	0	0	0	0	0	0	0	0	0	0	0	0	0	0	0	0	0	0	0	0	0	0	0	0	0	0	0	0	0	0	0	0	0	0	0	0	0	0	0	0	0	0	0	0	0	0	0	0
d__Eukaryota|k__Metazoa|p__Echinodermata|c__Echinoidea|o__Echinoida|f__Strongylocentrotidae|g__Strongylocentrotus|s__Strongylocentrotus purpuratus	Strongylocentrotus purpuratus	0	0	0	0	0	0	0	0	1	0	0	0	0	0	0	0	0	0	0	0	0	0	0	0	0	0	0	0	0	0	0	0	0	0	0	0	0	0	0	0	0	0	0	0	0	0	0	0
d__Eukaryota|k__Metazoa|p__Mollusca|c__Bivalvia|o__Pectinoida|f__Pectinidae|g__Mizuhopecten|s__Mizuhopecten yessoensis	Mizuhopecten yessoensis	9	0	0	0	0	1	0	0	0	0	0	52	2	0	0	0	0	0	0	0	0	0	0	0	2	836	1	0	0	2	1	191	569	0	0	12	0	0	0	11	77	0	0	2	0	0	0	0
d__Eukaryota|k__Metazoa|p__Platyhelminthes|c__Trematoda|o__Opisthorchiida|f__Opisthorchiidae|g__Opisthorchis|s__Opisthorchis viverrini	Opisthorchis viverrini	335	17	0	8	0	29	0	0	19	45	0	0	18	0	16	35	0	9	0	0	4	0	3	33	0	898	0	0	2	23	1	0	2	0	0	2	5	5	12	4	39	0	4	14	23	6	8	0
d__Eukaryota|k__Metazoa|p__Priapulida|c__Priapulimorpha|o__Priapulimorphida|f__Priapulidae|g__Priapulus|s__Priapulus caudatus	Priapulus caudatus	9	0	2	18	0	0	2	0	0	0	0	62	0	0	1	0	6	0	0	0	0	2	0	6	0	93	0	0	0	9	0	8	24	0	0	2	18	0	1	0	10	1	0	0	0	12	0	0
d__Eukaryota|k__Viridiplantae|p__Streptophyta|c__Liliopsida|o__Arecales|f__Arecaceae|g__Phoenix|s__Phoenix dactylifera	Phoenix dactylifera	0	0	0	0	3	0	28	0	0	0	0	1	0	0	0	0	0	4	0	0	0	0	0	0	11	0	0	0	0	0	0	0	43	0	1	0	0	0	5	0	0	0	0	0	0	0	0	0
d__Eukaryota|k__Viridiplantae|p__Streptophyta|c__Liliopsida|o__Poales|f__Bromeliaceae|g__Ananas|s__Ananas comosus	Ananas comosus	0	0	0	0	0	0	0	0	0	0	0	0	0	0	0	0	0	0	0	0	0	0	0	0	0	0	0	0	0	0	0	0	0	0	0	0	0	0	0	0	0	0	0	0	0	0	0	0
d__Eukaryota|k__Viridiplantae|p__Streptophyta|c__Liliopsida|o__Poales|f__Poaceae|g__Brachypodium|s__Brachypodium distachyon	Brachypodium distachyon	0	0	0	0	0	0	0	0	0	0	7	0	0	0	0	0	0	0	0	0	0	0	0	0	0	0	0	0	0	0	0	0	0	0	0	0	0	0	0	0	0	0	0	0	0	0	0	0
d__Eukaryota|k__Viridiplantae|p__Streptophyta|c__Liliopsida|o__Poales|f__Poaceae|g__Zea|s__Zea mays	Zea mays	0	0	0	0	2	0	0	0	0	0	3	0	1	0	0	0	0	0	0	0	0	0	4	0	0	0	0	0	0	0	0	0	0	0	0	0	0	0	0	0	0	0	0	1	0	0	0	0
d__Eukaryota|k__Viridiplantae|p__Streptophyta|c__Liliopsida|o__Zingiberales|f__Musaceae|g__Musa|s__Musa acuminata	Musa acuminata	0	26	0	0	0	0	0	0	0	0	0	0	5	0	0	0	0	0	0	0	0	0	8	0	0	0	0	0	0	0	0	0	0	0	0	0	0	0	0	0	41	0	0	16	30	1	0	0
d__Eukaryota|k__Viridiplantae|p__Streptophyta|o__Apiales|f__Apiaceae|g__Daucus|s__Daucus carota	Daucus carota	0	0	0	0	0	0	0	0	0	0	0	0	0	0	0	0	0	0	0	0	0	0	0	0	0	0	0	0	0	0	0	0	0	0	0	11	0	0	0	0	0	0	0	0	0	0	0	0
d__Eukaryota|k__Viridiplantae|p__Streptophyta|o__Asterales|f__Asteraceae|g__Helianthus|s__Helianthus annuus	Helianthus annuus	0	0	0	0	0	0	0	0	0	0	0	0	0	0	0	0	0	0	0	0	0	0	0	0	0	0	0	0	0	0	0	0	0	0	0	0	0	0	0	0	0	0	0	0	0	0	0	0
d__Eukaryota|k__Viridiplantae|p__Streptophyta|o__Asterales|f__Asteraceae|g__Lactuca|s__Lactuca sativa	Lactuca sativa	0	0	0	0	0	0	0	0	0	0	0	0	0	0	0	0	0	0	0	0	0	0	0	0	0	0	0	0	0	0	0	0	0	0	0	0	0	0	0	0	0	0	0	0	0	0	0	0
d__Eukaryota|k__Viridiplantae|p__Streptophyta|o__Brassicales|f__Brassicaceae|g__Brassica|s__Brassica napus	Brassica napus	0	0	0	0	0	0	0	0	2	0	0	0	2	0	0	1	0	0	0	0	0	0	0	0	0	0	0	0	0	0	0	0	0	0	0	1	0	0	0	0	0	0	0	0	0	0	0	0
d__Eukaryota|k__Viridiplantae|p__Streptophyta|o__Brassicales|f__Caricaceae|g__Carica|s__Carica papaya	Carica papaya	41	0	5	0	0	0	18	0	0	0	0	133	0	0	0	0	0	0	0	0	0	0	1	0	0	90	1	0	0	0	0	3	29	0	0	2	0	0	0	0	17	0	0	0	0	0	0	0
d__Eukaryota|k__Viridiplantae|p__Streptophyta|o__Caryophyllales|f__Chenopodiaceae|g__Beta|s__Beta vulgaris	Beta vulgaris	0	0	0	0	0	0	0	0	0	0	0	0	0	0	0	0	0	0	0	0	0	0	0	0	0	0	0	0	0	0	0	0	0	0	0	0	0	0	1	0	0	0	0	0	0	0	0	0
d__Eukaryota|k__Viridiplantae|p__Streptophyta|o__Caryophyllales|f__Chenopodiaceae|g__Spinacia|s__Spinacia oleracea	Spinacia oleracea	0	0	0	0	0	0	0	0	0	0	0	0	0	0	0	0	0	0	0	0	0	0	0	0	0	0	0	0	0	0	0	0	0	0	0	0	0	0	0	0	0	0	0	0	0	0	0	0
d__Eukaryota|k__Viridiplantae|p__Streptophyta|o__Cucurbitales|f__Cucurbitaceae|g__Cucumis|s__Cucumis melo	Cucumis melo	0	0	0	0	3	2	0	0	0	0	0	0	0	0	0	0	0	0	0	0	0	0	0	0	0	0	0	0	0	0	0	0	0	0	0	0	0	0	0	0	0	0	0	2	0	0	0	0
d__Eukaryota|k__Viridiplantae|p__Streptophyta|o__Cucurbitales|f__Cucurbitaceae|g__Cucumis|s__Cucumis sativus	Cucumis sativus	0	0	0	0	1	0	0	0	0	0	0	0	0	0	0	0	0	0	0	0	0	0	0	0	0	0	0	0	0	0	0	0	0	0	0	0	0	0	0	0	0	0	0	0	0	0	0	0
d__Eukaryota|k__Viridiplantae|p__Streptophyta|o__Cucurbitales|f__Cucurbitaceae|g__Cucurbita|s__Cucurbita moschata	Cucurbita moschata	0	0	0	0	0	0	0	0	0	0	0	0	0	0	0	0	0	0	0	0	0	0	0	0	0	0	1	0	0	0	0	0	0	0	0	2	0	0	0	0	0	0	0	0	0	0	0	0
d__Eukaryota|k__Viridiplantae|p__Streptophyta|o__Ericales|f__Theaceae|g__Camellia|s__Camellia sinensis	Camellia sinensis	0	0	0	0	0	0	0	0	0	0	0	0	0	0	0	0	0	0	0	0	0	0	0	0	0	0	0	0	2	0	0	0	0	0	0	1	0	0	0	0	0	0	0	0	0	0	0	0
d__Eukaryota|k__Viridiplantae|p__Streptophyta|o__Fabales|f__Fabaceae|g__Arachis|s__Arachis hypogaea	Arachis hypogaea	0	0	0	0	0	0	0	0	0	0	0	0	0	0	0	0	0	0	0	0	0	0	0	0	0	0	0	0	0	0	0	0	0	0	0	0	0	0	2	0	0	0	0	0	0	0	0	0
d__Eukaryota|k__Viridiplantae|p__Streptophyta|o__Fabales|f__Fabaceae|g__Cicer|s__Cicer arietinum	Cicer arietinum	0	0	0	0	0	0	0	0	0	0	0	0	0	0	0	0	0	0	0	0	0	0	0	0	0	0	0	0	0	0	0	0	0	0	0	0	0	0	0	0	0	0	0	0	0	0	0	0
d__Eukaryota|k__Viridiplantae|p__Streptophyta|o__Fabales|f__Fabaceae|g__Glycine|s__Glycine max	Glycine max	0	0	0	0	0	0	0	0	0	0	0	0	0	0	0	0	0	0	0	0	0	0	0	0	0	0	0	0	0	0	0	0	0	0	0	0	0	0	0	0	0	0	0	0	1	0	0	0
d__Eukaryota|k__Viridiplantae|p__Streptophyta|o__Fabales|f__Fabaceae|g__Medicago|s__Medicago truncatula	Medicago truncatula	0	0	0	0	0	0	0	0	0	0	2	0	0	0	0	0	0	0	0	0	0	0	0	0	0	0	0	0	0	0	0	0	0	0	0	0	0	0	0	0	0	0	0	0	0	0	0	0
d__Eukaryota|k__Viridiplantae|p__Streptophyta|o__Fagales|f__Juglandaceae|g__Juglans|s__Juglans regia	Juglans regia	0	0	0	0	0	0	0	0	0	0	0	0	1	0	0	0	0	0	0	0	0	0	0	0	0	0	0	0	0	0	0	0	0	0	0	0	0	0	6	0	0	0	0	0	0	0	0	0
d__Eukaryota|k__Viridiplantae|p__Streptophyta|o__Lamiales|f__Oleaceae|g__Olea|s__Olea europaea	Olea europaea	0	0	0	0	0	0	0	0	0	0	0	0	0	0	0	0	0	0	0	0	0	0	0	0	0	0	0	0	0	0	0	0	0	0	0	0	0	0	1	0	0	0	0	0	0	0	0	0
d__Eukaryota|k__Viridiplantae|p__Streptophyta|o__Malpighiales|f__Euphorbiaceae|g__Hevea|s__Hevea brasiliensis	Hevea brasiliensis	0	0	0	0	0	0	0	0	0	0	0	0	0	0	0	0	0	0	0	0	0	0	0	0	0	0	0	0	0	0	0	0	0	0	0	0	0	0	2	0	0	0	0	0	0	0	0	0
d__Eukaryota|k__Viridiplantae|p__Streptophyta|o__Malpighiales|f__Euphorbiaceae|g__Ricinus|s__Ricinus communis	Ricinus communis	0	0	0	0	0	0	0	0	0	0	0	0	0	0	0	1	0	0	0	0	0	0	0	0	0	0	0	0	0	0	0	0	0	0	0	0	0	0	0	0	0	0	0	2	0	0	0	0
d__Eukaryota|k__Viridiplantae|p__Streptophyta|o__Malvales|f__Malvaceae|g__Durio|s__Durio zibethinus	Durio zibethinus	0	0	0	0	0	0	0	0	0	0	0	0	0	0	0	0	0	0	0	0	0	0	0	0	0	0	0	0	0	0	0	0	0	0	0	0	0	0	2	0	0	0	0	0	0	0	0	0
d__Eukaryota|k__Viridiplantae|p__Streptophyta|o__Malvales|f__Malvaceae|g__Gossypium|s__Gossypium hirsutum	Gossypium hirsutum	0	0	0	0	0	0	0	0	0	0	0	0	0	0	0	3	0	0	0	0	0	0	0	0	0	0	0	0	0	0	0	0	0	0	0	0	0	0	0	0	0	0	0	0	0	0	0	0
d__Eukaryota|k__Viridiplantae|p__Streptophyta|o__Malvales|f__Malvaceae|g__Theobroma|s__Theobroma cacao	Theobroma cacao	0	1	0	0	0	0	0	0	0	0	0	0	0	0	0	0	0	0	0	0	0	0	0	0	0	0	0	0	0	0	0	0	0	0	0	0	0	0	0	0	0	0	0	0	0	0	0	0
d__Eukaryota|k__Viridiplantae|p__Streptophyta|o__Myrtales|f__Myrtaceae|g__Eucalyptus|s__Eucalyptus grandis	Eucalyptus grandis	0	0	0	0	0	0	0	0	0	0	0	1	0	0	0	0	0	0	0	0	0	0	0	0	0	0	0	0	0	0	0	0	0	0	0	0	0	0	0	0	0	0	0	0	0	0	0	0
d__Eukaryota|k__Viridiplantae|p__Streptophyta|o__Rosales|f__Rosaceae|g__Fragaria|s__Fragaria vesca	Fragaria vesca	0	0	0	0	0	0	0	0	0	0	0	0	0	0	0	0	0	0	0	0	0	0	0	0	0	0	0	0	0	0	0	0	0	0	0	0	0	0	0	0	0	0	0	0	0	0	0	0
d__Eukaryota|k__Viridiplantae|p__Streptophyta|o__Rosales|f__Rosaceae|g__Prunus|s__Prunus avium	Prunus avium	0	0	0	0	0	0	0	0	0	0	0	0	0	0	0	0	0	0	0	1	0	0	0	0	0	0	0	0	0	0	0	0	0	0	0	0	0	0	0	0	0	0	0	0	0	0	0	0
d__Eukaryota|k__Viridiplantae|p__Streptophyta|o__Sapindales|f__Rutaceae|g__Citrus|s__Citrus sinensis	Citrus sinensis	0	0	5	0	0	0	0	0	0	2	0	0	0	0	0	0	0	0	0	0	0	0	0	0	0	0	0	0	0	0	0	0	0	0	0	0	0	0	104	0	0	2	0	0	0	0	0	0
d__Eukaryota|k__Viridiplantae|p__Streptophyta|o__Solanales|f__Solanaceae|g__Capsicum|s__Capsicum annuum	Capsicum annuum	0	0	0	0	0	0	0	0	0	0	0	0	0	0	0	0	0	0	0	0	0	0	0	0	0	0	0	0	0	0	0	0	0	0	0	0	0	0	1	0	0	0	0	0	0	0	0	0
d__Eukaryota|k__Viridiplantae|p__Streptophyta|o__Solanales|f__Solanaceae|g__Nicotiana|s__Nicotiana tabacum	Nicotiana tabacum	0	0	0	0	0	0	0	0	2	0	0	0	0	0	0	0	0	0	0	0	0	0	0	0	0	0	0	0	0	0	0	0	0	0	0	0	0	0	0	0	0	0	0	0	0	0	0	0
d__Eukaryota|k__Viridiplantae|p__Streptophyta|o__Solanales|f__Solanaceae|g__Solanum|s__Solanum lycopersicum	Solanum lycopersicum	0	0	0	0	0	0	0	0	0	0	0	0	0	0	0	0	0	0	0	2	0	0	0	0	0	0	0	0	0	0	0	0	0	0	0	0	0	0	0	0	0	0	0	0	0	0	0	0
d__Eukaryota|k__Viridiplantae|p__Streptophyta|o__Solanales|f__Solanaceae|g__Solanum|s__Solanum tuberosum	Solanum tuberosum	0	0	0	0	0	0	0	0	0	0	0	0	0	0	0	0	0	0	0	0	0	0	0	0	0	0	0	0	0	0	0	0	0	0	0	0	0	0	0	0	0	0	0	0	0	0	0	0
d__Eukaryota|k__Viridiplantae|p__Streptophyta|o__Vitales|f__Vitaceae|g__Vitis|s__Vitis vinifera	Vitis vinifera	0	0	0	0	0	0	0	0	0	0	0	0	0	0	0	0	0	0	0	0	0	0	0	0	0	0	0	0	0	0	0	0	0	0	0	0	0	0	2	0	0	0	0	0	4	0	0	0
d__Eukaryota|o__Diplomonadida|f__Hexamitidae|g__Giardia|s__Giardia intestinalis	Giardia intestinalis	0	0	0	0	0	0	0	0	0	0	0	0	0	0	0	0	2	0	0	0	0	0	0	0	0	0	0	0	0	0	0	0	0	27	0	0	2	0	0	0	0	0	0	0	0	0	0	0
d__Eukaryota|o__Trichomonadida|f__Trichomonadidae|g__Trichomonas|s__Trichomonas vaginalis	Trichomonas vaginalis	0	0	0	0	1	121	0	0	1	0	0	0	0	2	0	0	0	0	0	0	0	0	0	0	0	0	0	0	0	0	0	0	0	0	0	0	0	0	0	1	0	0	0	0	0	0	0	0
d__Eukaryota|p__Apicomplexa|c__Conoidasida|o__Eucoccidiorida|f__Cryptosporidiidae|g__Cryptosporidium|s__Cryptosporidium hominis	Cryptosporidium hominis	0	0	0	0	0	0	0	0	0	0	0	0	0	0	0	0	0	5	0	0	0	0	0	0	0	0	0	207349	0	0	0	0	0	0	0	0	0	0	12	0	0	0	0	2	0	4	27	0
d__Eukaryota|p__Apicomplexa|c__Conoidasida|o__Eucoccidiorida|f__Cryptosporidiidae|g__Cryptosporidium|s__Cryptosporidium parvum	Cryptosporidium parvum	0	0	0	0	0	0	0	0	0	0	0	0	0	0	0	0	0	0	0	0	0	0	0	0	0	0	0	19160	0	0	0	0	0	0	0	0	0	0	0	0	0	0	0	0	0	0	2	0
d__Eukaryota|p__Apicomplexa|c__Conoidasida|o__Eucoccidiorida|f__Eimeriidae|g__Cyclospora|s__Cyclospora cayetanensis	Cyclospora cayetanensis	0	5	0	0	0	0	0	0	0	0	2	0	14	9	21	17	0	27	2	14	2	5	49	0	0	0	0	0	0	0	0	0	0	0	0	115	0	81	21	0	3	7	7	48	36	87	56	0
d__Eukaryota|p__Apicomplexa|c__Conoidasida|o__Eucoccidiorida|f__Sarcocystidae|g__Toxoplasma|s__Toxoplasma gondii	Toxoplasma gondii	471	24	40	0	2	15	241	0	7	1	1	2683	0	0	0	1	0	1	0	0	0	0	2	1	6	3145	22	2	0	1	1	192	682	4	0	119	0	0	0	11	288	0	0	8	4	0	0	0
[truncated: 52 more columns]

## Sheet: blast euk check
					blast result taxid
	taxid				548	562	573	575	582	584	585	587	588	1351	1352	1522	1547	1639	2711	3483	3562	3747	3755	3760	4232	4565	4577	4579	4628	4641	6954	6956	8030	8032	9031	9103	9606	9615	9662	9685	9733	9755	9823	9860	9904	9909	9913	9915	9940
	2711	Citrus sinensis	2711	2711.fasta	0	0	0	0	0	0	0	0	0	0	0	0	0	0	59	2	0	0	0	0	0	0	0	0	0	0	0	0	0	0	0	0	0	0	0	0	0	0	0	0	0	0	0	0	0
	3562	Spinacia oleracea	3562	3562.fasta	0	0	0	0	0	0	0	0	0	0	0	0	0	0	0	0	37	0	0	0	0	0	0	0	0	0	0	0	0	0	0	0	0	0	0	0	0	0	0	0	0	0	0	0	0
human	3649	Carica papaya	3649	3649.fasta	0	0	0	0	0	0	0	0	0	0	0	0	0	0	0	0	0	0	0	0	0	0	0	0	0	0	0	0	0	0	0	0	239	0	0	0	0	0	0	0	0	0	0	0	0
	4232	Helianthus annuus	4232	4232.fasta	0	0	0	0	0	0	0	0	0	0	0	0	0	0	0	0	0	0	0	0	7	0	0	0	0	0	0	0	0	0	0	0	0	0	0	0	0	0	0	0	0	0	0	0	0
	4577	Zea mays	4577	4577.fasta	0	0	0	0	0	0	0	0	0	0	0	0	0	0	0	0	0	0	0	0	0	1	10	2	0	0	0	0	0	0	0	0	0	0	0	0	0	0	0	0	0	0	0	0	0
	6573	Mizuhopecten yessoensis	6573	6573.fasta	0	0	0	0	0	0	0	0	0	0	0	0	0	0	0	0	0	0	0	0	0	0	0	0	0	0	0	0	0	0	0	0	1744	0	0	0	0	0	0	0	0	0	0	0	0
bact	6850	Limulus polyphemus	6850	6850.fasta	0	0	0	0	0	0	0	0	0	0	0	0	0	0	0	0	0	0	0	0	0	0	0	0	0	0	0	0	0	0	0	0	0	0	0	0	0	0	0	0	0	0	0	0	0
	6956	Dermatophagoides pteronyssinus	6956	6956.fasta	0	0	0	0	0	0	0	0	0	0	0	0	0	0	0	0	0	0	0	0	0	0	0	0	0	0	1	29	0	0	0	0	0	0	0	0	0	0	0	0	0	0	0	0	0
bact	7375	Lucilia cuprina	7375	7375.fasta	0	6	0	0	639	56	4	25	39	0	0	0	0	0	0	0	0	0	0	0	0	0	0	0	0	0	0	0	0	0	0	0	0	0	0	0	0	0	0	0	0	0	0	0	0
human	8030	Salmo salar	8030	8030.fasta	0	0	0	0	0	0	0	0	0	0	0	0	70	0	0	0	0	0	0	0	0	0	0	0	0	0	0	0	6	4	0	0	697	0	0	0	0	0	0	0	0	0	0	0	0
human	8478	Chrysemys picta	8478	8478.fasta	0	0	0	0	0	0	0	0	0	0	0	0	0	0	0	0	0	0	0	0	0	0	0	0	0	0	0	0	0	0	0	0	33	0	0	0	0	0	0	0	0	0	0	0	0
	9031	Gallus gallus	9031	9031.fasta	0	0	0	0	0	0	0	0	0	0	0	0	0	0	0	0	0	0	0	0	0	0	0	0	0	0	0	0	0	0	49	3	0	0	0	0	0	0	0	0	0	0	0	0	0
	9823	Sus scrofa	9823	9823.fasta	0	0	0	0	0	0	0	0	0	0	0	0	0	0	0	0	0	0	0	0	0	0	0	0	0	0	0	0	0	0	0	0	2	0	1	1	3	0	36	0	0	0	0	0	0
	9913	Bos taurus	9913	9913.fasta	0	0	0	0	0	0	0	0	0	0	0	0	0	0	0	0	0	0	0	0	0	0	0	0	0	0	0	0	0	0	0	0	1	1	1	0	4	1	0	58	1	2	307	108	3
bact	28588	Zeugodacus cucurbitae	28588	28588.fasta	0	0	0	0	0	0	0	0	0	2655	0	0	0	0	0	0	0	0	0	0	0	0	0	0	0	0	0	0	0	0	0	0	0	0	0	0	0	0	0	0	0	0	0	0	0
bact	28612	Rhagoletis zephyria	28612	28612.fasta	0	0	9	0	0	0	0	0	0	0	0	0	0	0	0	0	0	0	0	0	0	0	0	0	0	0	0	0	0	0	0	0	0	0	0	0	0	0	0	0	0	0	0	0	0
	29760	Vitis vinifera	29760	29760.fasta	0	0	0	0	0	0	0	0	0	0	0	0	0	0	1	0	0	0	0	0	0	0	0	0	0	0	0	0	0	0	0	0	0	0	0	0	0	0	0	0	0	0	0	0	0
bact	37621	Priapulus caudatus	37621	37621.fasta	0	0	0	0	0	0	0	0	0	0	0	2100	0	0	0	0	0	0	0	0	0	0	0	0	0	0	0	0	0	0	0	0	212	0	0	0	0	0	0	0	0	0	0	0	0
	42229	Prunus avium	42229	42229.fasta	0	0	0	0	0	0	0	0	0	0	0	0	0	0	0	0	0	0	17	1	0	0	0	0	0	0	0	0	0	0	0	0	0	0	0	0	0	0	0	0	0	0	0	0	0
bact	42345	Phoenix dactylifera	42345	42345.fasta	0	120	0	0	0	0	0	0	0	0	0	0	0	0	4	0	0	0	0	0	0	0	0	0	0	0	0	0	0	0	0	0	0	0	0	0	0	0	0	0	0	0	0	0	0
bact	51655	Plutella xylostella	51655	51655.fasta	175	0	0	3	0	0	0	0	0	0	0	0	0	0	0	0	0	0	0	0	0	0	0	0	0	0	0	0	0	0	0	0	0	0	0	0	0	0	0	0	0	0	0	0	0
bact	69820	Spodoptera litura	69820	69820.fasta	0	0	0	0	0	0	0	0	0	33	2	0	0	3	0	0	0	0	0	0	0	0	0	0	0	0	0	0	0	0	0	0	0	0	0	0	0	0	0	0	0	0	0	0	0
	101020	Fragaria vesca	101020	101020.fasta	0	0	0	0	0	0	0	0	0	0	0	0	0	0	0	0	0	1	0	0	0	0	0	0	0	0	0	0	0	0	0	0	0	0	0	0	0	0	0	0	0	0	0	0	0
	214687	Musa acuminata	214687	214687.fasta	0	0	0	0	0	0	0	0	0	0	0	0	0	0	0	0	0	0	0	0	0	0	0	0	2	17	0	0	0	0	0	0	0	0	0	0	0	0	0	0	0	0	0	0	0
	Highlighted to remove - contamination
					823	1314	5722	5741	5807	9606	12968	38018	99802	111789	119602	135588	163714	175245	175275	184922	237895	334625	353151	353152	371601	412133	437897	478820	797742	944160	944168	1049725	2026809	2170413	2170627	2502305	2792859	2810146	2826417	2841037	2948573
		12968	Blastocystis hominis	12968.fasta	0	0	0	0	0	0	23	0	0	0	0	0	0	6	0	0	0	0	0	0	0	0	0	1	0	14	6	6	0	0	0	0	0	1	0	0	0
	Bacteroides	184922	Giardia intestinalis	184922.fasta	728	0	0	75	0	0	0	0	0	0	0	0	0	0	0	5	0	0	0	0	1	0	0	0	0	0	0	0	0	10	0	0	2936	0	3	0	0
		353152	Cryptosporidium parvum	353152.fasta	0	0	0	0	18574	0	0	0	0	0	0	0	0	0	1	0	27	0	442	18	0	0	0	0	12	0	0	0	0	0	0	0	0	0	0	0	0
	Streptococcus	412133	Trichomonas vaginalis	412133.fasta	0	12	17	0	0	0	0	0	0	0	63	2	0	0	0	0	0	0	0	0	0	2	0	0	0	0	0	0	0	0	0	0	0	0	0	0	29
	Human	508771	Toxoplasma gondii	508771.fasta	0	0	0	0	0	7808	0	0	3	7	0	0	9	0	0	0	0	61	0	0	0	0	0	0	0	0	0	0	0	0	4	0	0	0	0	0	0
	Bacteria	88456	Cyclospora cayetanensis	88456.fasta	0	0	0	0	0	0	0	176	0	0	0	0	0	0	0	0	0	0	0	0	0	0	527	0	0	0	0	0	1	50	0	1	0	0	0	49	0
[truncated: 107 more columns]

## Sheet: meta
SampleID	Study*	Age_days	Age_cat	Sex	Pair	colour
elcho01	elcho	35	0	0	2	red
elcho02	elcho	35	0	0	3	red
elcho03	elcho	56	0	0	5	red
elcho04	elcho	60	0	0	7	red
elcho05	elcho	100	0	0	6	red
elcho06	elcho	149	0	0	11	red
elcho07	elcho	164	1	0	8	red
elcho08	elcho	166	1	0	13	red
elcho09	elcho	214	1	0	15	red
elcho10	elcho	217	1	0	16	red
elcho11	elcho	245	1	0	17	red
elcho12	elcho	279	1	0	21	red
elcho13	elcho	308	2	0	23	red
elcho14	elcho	311	2	0	24	red
elcho15	elcho	332	2	0	25	red
elcho16	elcho	356	2	0	28	red
elcho17	elcho	367	2	0	29	red
elcho18	elcho	405	2	0	35	red
elcho19	elcho	436	2	0	39	red
elcho20	elcho	441	2	0	37	red
elcho21	elcho	549	3	0	45	red
elcho22	elcho	571	3	0	46	red
elcho23	elcho	594	3	0	50	red
elcho24	elcho	617	3	0	49	red
elcho25	elcho	22	0	1	1	red
elcho26	elcho	47	0	1	4	red
elcho27	elcho	118	0	1	10	red
elcho28	elcho	147	0	1	9	red
elcho29	elcho	160	1	1	12	red
elcho30	elcho	205	1	1	14	red
elcho31	elcho	228	1	1	18	red
elcho32	elcho	240	1	1	20	red
elcho33	elcho	250	1	1	19	red
elcho34	elcho	285	1	1	22	red
elcho35	elcho	329	2	1	26	red
elcho36	elcho	333	2	1	31	red
elcho37	elcho	346	2	1	27	red
elcho38	elcho	374	2	1	30	red
elcho39	elcho	380	2	1	32	red
elcho40	elcho	382	2	1	33	red
elcho41	elcho	431	2	1	36	red
elcho42	elcho	462	3	1	40	red
elcho43	elcho	463	3	1	38	red
elcho44	elcho	476	3	1	34	red
elcho45	elcho	476	3	1	41	red
elcho46	elcho	511	3	1	42	red
elcho47	elcho	511	3	1	43	red
elcho48	elcho	537	3	1	44	red
elcho49	elcho	566	3	1	47	red
elcho50	elcho	567	3	1	48	red
endia01	endia	16	0	0	2	blue
endia02	endia	27	0	0	3	blue
endia03	endia	74	0	0	5	blue
endia04	endia	84	0	0	6	blue
endia05	endia	90	0	0	7	blue
endia06	endia	97	0	0	8	blue
endia07	endia	163	1	0	11	blue
endia08	endia	174	1	0	13	blue
endia09	endia	203	1	0	15	blue
endia10	endia	223	1	0	16	blue
endia11	endia	233	1	0	17	blue
endia12	endia	280	1	0	21	blue
endia13	endia	306	2	0	23	blue
endia14	endia	310	2	0	24	blue
endia15	endia	328	2	0	25	blue
endia16	endia	364	2	0	28	blue
endia17	endia	367	2	0	29	blue
endia18	endia	410	2	0	35	blue
endia19	endia	440	2	0	37	blue
endia20	endia	461	3	0	39	blue
endia21	endia	553	3	0	45	blue
endia22	endia	565	3	0	46	blue
endia23	endia	580	3	0	49	blue
endia24	endia	589	3	0	50	blue
endia25	endia	13	0	1	1	blue
endia26	endia	73	0	1	4	blue
endia27	endia	112	0	1	9	blue
endia28	endia	120	0	1	10	blue
endia29	endia	172	1	1	12	blue
endia30	endia	197	1	1	14	blue
endia31	endia	235	1	1	18	blue
endia32	endia	255	1	1	19	blue
endia33	endia	258	1	1	20	blue
endia34	endia	283	1	1	22	blue
endia35	endia	331	2	1	26	blue
endia36	endia	347	2	1	27	blue
endia37	endia	375	2	1	30	blue
endia38	endia	378	2	1	31	blue
endia39	endia	379	2	1	32	blue
endia40	endia	393	2	1	33	blue
endia41	endia	394	2	1	34	blue
endia42	endia	422	2	1	36	blue
endia43	endia	458	3	1	38	blue
endia44	endia	462	3	1	40	blue
endia45	endia	480	3	1	41	blue
endia46	endia	506	3	1	42	blue
endia47	endia	512	3	1	43	blue
endia48	endia	533	3	1	44	blue
endia49	endia	566	3	1	47	blue
endia50	endia	573	3	1	48	blue
	*elcho=Early Life Child Health Observation study (Indigenous);
	*endia=Environmental Determinants of Islet Autoimmunity study (Non-indigenous)

## Sheet: abundance plots
SampleID		elcho25	elcho01	elcho02	elcho26	elcho03	elcho04	elcho05	elcho27	elcho28	elcho06	elcho29	elcho07	elcho08	elcho30	elcho09	elcho10	elcho31	elcho32	elcho11	elcho33	elcho12	elcho34	elcho13	elcho14	elcho35	elcho15	elcho36	elcho37	elcho16	elcho17	elcho38	elcho39	elcho40	elcho18	elcho41	elcho19	elcho20	elcho42	elcho43	elcho44	elcho45	elcho46	elcho47	elcho48	elcho21	elcho49	elcho50	elcho22
Study		elcho	elcho	elcho	elcho	elcho	elcho	elcho	elcho	elcho	elcho	elcho	elcho	elcho	elcho	elcho	elcho	elcho	elcho	elcho	elcho	elcho	elcho	elcho	elcho	elcho	elcho	elcho	elcho	elcho	elcho	elcho	elcho	elcho	elcho	elcho	elcho	elcho	elcho	elcho	elcho	elcho	elcho	elcho	elcho	elcho	elcho	elcho	elcho
Age_days		22	35	35	47	56	60	100	118	147	149	160	164	166	205	214	217	228	240	245	250	279	285	308	311	329	332	333	346	356	367	374	380	382	405	431	436	441	462	463	476	476	511	511	537	549	566	567	571
Age_cat		age0	age0	age0	age0	age0	age0	age0	age0	age0	age0	age1	age1	age1	age1	age1	age1	age1	age1	age1	age1	age1	age1	age2	age2	age2	age2	age2	age2	age2	age2	age2	age2	age2	age2	age2	age2	age2	age3	age3	age3	age3	age3	age3	age3	age3	age3	age3	age3
Sex		M	F	F	M	F	F	F	M	M	F	M	F	F	M	F	F	M	M	F	M	F	M	F	F	M	F	M	M	F	F	M	M	M	F	M	F	F	M	M	M	M	M	M	M	F	M	M	F
s	species	22	35	35	47	56	60	100	118	147	149	160	164	166	205	214	217	228	240	245	250	279	285	308	311	329	332	333	346	356	367	374	380	382	405	431	436	441	462	463	476	476	511	511	537	549	566	567	571
d__Viruses|k__Heunggongvirae|p__Uroviricota|c__Caudoviricetes|f__Peduoviridae|g__Quadragintavirus|s__Quadragintavirus ev129	Quadragintavirus ev129	76297	135976	57431	90270	87712	86901	34300	87739	75831	75463	51344	137797	90847	61711	72144	54269	87251	157619	54188	138175	186907	41579	82898	127483	182898	9294	86098	61739	41254	119130	45763	224260	46860	77081	68021	869	71336	70766	91776	140084	133864	155313	78542	71481	77469	45457	161497	158795
d__Viruses|k__Heunggongvirae|p__Uroviricota|c__Caudoviricetes|f__Peduoviridae|g__Evevirus|s__Evevirus ev239	Evevirus ev239	28927	53478	29617	34785	29683	42474	14683	44616	41031	30188	29445	55803	50358	3113	39780	13456	38026	62419	119739	52950	65967	11774	46411	57146	96723	1033	47461	189821	15293	52074	12458	88153	20448	37937	32027	402	28504	27650	40422	69804	69037	63896	38862	31421	4351	20722	61321	71917
d__Viruses|k__Heunggongvirae|p__Uroviricota|c__Caudoviricetes|g__Jouyvirus|s__Jouyvirus ev017	Jouyvirus ev017	25107	41407	19731	29769	21836	28262	10980	31152	26273	17664	18468	41463	39075	2878	26556	7973	27506	48995	2491	41102	62339	10155	279916	37495	60146	864	36586	2238	9971	42516	8342	59762	15322	23954	22646	256	19985	19210	26557	46049	44174	25542	26253	22192	3148	14023	48010	48110
d__Viruses|k__Heunggongvirae|p__Uroviricota|c__Caudoviricetes|f__Peduoviridae|g__Peduovirus|s__Peduovirus P22H1	Peduovirus P22H1	24332	32747	12986	22978	23126	24093	5895	16290	16906	15199	8139	35620	28573	15306	12549	10983	22983	41835	13388	31724	47205	11144	12195	31800	35651	2072	24157	15810	8430	30288	11645	64614	12300	17408	17025	250	17646	20627	24057	33127	28495	40472	17940	15481	17324	10199	57654	40352
d__Viruses|k__Heunggongvirae|p__Uroviricota|c__Caudoviricetes|f__Autographiviridae|g__Friunavirus|s__Friunavirus AbKT21III	Friunavirus AbKT21III	6	2	0	0	0	0	0	152	32	0	12	3	8	150	12	221	23	0	3040	1	1	12	31	2	1	24	0	139	559	1	0	0	94	61	0	0	42	2	0	49	326	426797	19	0	251760	92	123	9
d__Viruses|k__Heunggongvirae|p__Uroviricota|c__Caudoviricetes|f__Straboviridae|g__Tequatrovirus|s__Tequatrovirus kaw	Tequatrovirus kaw	36012	23490	9931	19578	18370	17754	3085	12016	12951	8709	5682	58274	29672	129385	8784	3859	17545	33750	3702	22910	40424	5401	20420	24450	22394	448	24907	4668	4078	21999	5326	43043	9400	13769	13194	170	13821	15060	18192	26758	21227	21678	11901	11633	3919	8180	46274	67058
d__Viruses|k__Heunggongvirae|p__Uroviricota|c__Caudoviricetes|f__Straboviridae|g__Tequatrovirus|s__Tequatrovirus gee4507	Tequatrovirus gee4507	18931	25411	12714	19208	17669	20617	4723	16973	15328	10624	9081	31002	29443	1186	11993	4401	19931	34893	759	25681	39053	5972	24487	29636	32450	574	27926	768	5143	26554	6089	47676	11046	16833	15810	182	15724	14299	21829	30131	27366	25846	16430	15688	929	10274	41956	34562
d__Viruses|k__Heunggongvirae|p__Uroviricota|c__Caudoviricetes|g__Jouyvirus|s__Jouyvirus ev207	Jouyvirus ev207	15021	19740	8664	13356	13604	12636	4866	12031	10929	9710	6613	21529	14452	8377	9232	6059	13497	24085	8223	20464	28062	7150	3017	20595	21898	1296	14580	9146	5320	18035	6599	34850	7181	11556	10272	123	11450	11299	15342	21401	18337	22773	10511	11525	11040	7275	26400	24281
d__Viruses|k__Heunggongvirae|p__Uroviricota|c__Caudoviricetes|g__Radostvirus|s__Radostvirus ev099	Radostvirus ev099	11337	17866	7626	11487	13019	11190	4869	11921	10187	9349	6191	19027	11762	8025	9240	6074	11861	22196	6976	20812	24408	9352	8693	15820	21611	897	11721	7460	5921	15263	5877	27216	6296	8987	8572	104	8696	9468	11114	19050	15674	18874	9354	8086	8724	5691	22217	18992
d__Viruses|k__Heunggongvirae|p__Uroviricota|c__Caudoviricetes|f__Peduoviridae|g__Eganvirus|s__Eganvirus SW9	Eganvirus SW9	12194	13533	7235	11111	8628	12922	2053	7399	8152	5107	3846	15034	20601	711	5573	2823	12299	17555	236	13607	22129	3564	14618	17380	15602	265	18213	257	2794	17514	3791	29570	7046	8993	8804	136	9275	10335	12922	15503	14265	9264	10144	8646	718	5951	30251	21506
d__Viruses|k__Heunggongvirae|p__Uroviricota|c__Caudoviricetes|o__Crassvirales|f__Suoliviridae|g__Afonbuvirus|s__Afonbuvirus intestinihominis	Afonbuvirus intestinihominis	0	0	0	0	0	0	0	0	0	0	0	1	0	0	0	0	0	0	453	1	0	0	1541	207	0	71	0	0	0	0	0	2188	6	0	0	9	2	54	0	0	0	83654	147398	0	0	0	32098	0
d__Viruses|k__Heunggongvirae|p__Uroviricota|c__Caudoviricetes|f__Peduoviridae|g__Peduovirus|s__Peduovirus P22H4	Peduovirus P22H4	5663	6652	3535	5185	4694	6403	1129	4013	4082	2804	2225	7834	10033	1870	3224	1602	6316	9138	348	6709	10215	2036	6908	8398	8476	154	8694	223	1623	8661	2034	14840	3484	4846	4359	72	4521	4902	6253	8458	7572	10187	5061	4116	2744	2821	14891	11088
d__Viruses|k__Heunggongvirae|p__Uroviricota|c__Caudoviricetes|g__Moineauvirus|s__Streptococcus phage D1024	Streptococcus phage D1024	2652	4372	1606	4189	2401	2974	549	2107	1857	1370	963	4697	5040	212	1267	525	2767	6231	187	4419	7542	820	3384	3923	4112	79	4770	145	604	3620	767	6614	1659	2008	2487	36	2047	2022	2884	3845	3319	4412	2051	1898	144	1237	7169	4873
d__Viruses|k__Heunggongvirae|p__Uroviricota|c__Caudoviricetes|o__Crassvirales|f__Suoliviridae|g__Afonbuvirus|s__Afonbuvirus coli	Afonbuvirus coli	0	0	0	0	1	0	0	0	0	0	0	0	0	0	0	0	0	0	119	0	0	0	589	90	0	39	0	0	0	0	2	5054	294	0	0	2	1	70	1	1	0	35384	61720	1	0	0	14781	0
d__Viruses|k__Heunggongvirae|p__Uroviricota|c__Caudoviricetes|o__Crassvirales|f__Suoliviridae|g__Afonbuvirus|s__Afonbuvirus faecalis	Afonbuvirus faecalis	0	0	0	0	0	0	0	0	0	0	1	0	0	0	0	0	0	0	200	0	0	0	586	195	0	21	1	0	0	0	0	1663	261	0	0	0	0	138	0	0	1	31742	55557	0	0	1	26696	0
d__Viruses|k__Heunggongvirae|p__Uroviricota|c__Caudoviricetes|g__Moineauvirus|s__Streptococcus phage CHPC1062	Streptococcus phage CHPC1062	3695	4113	1169	3069	2736	2262	310	1407	1340	1199	535	4351	3340	1100	893	683	2220	5631	1179	3653	6969	1028	1974	3485	1885	239	3080	1385	482	2838	875	5877	1293	1549	1901	64	1783	2084	2308	3179	2445	3541	1379	1458	1480	1116	6181	3872
d__Viruses|k__Heunggongvirae|p__Uroviricota|c__Caudoviricetes|o__Crassvirales|f__Suoliviridae|g__Buchavirus|s__Buchavirus faecalis	Buchavirus faecalis	0	1	0	0	0	1	0	0	0	0	0	0	0	1	0	0	1	0	111366	0	0	0	0	0	0	0	1	292	0	0	0	0	325	4	1	26	0	179	3	0	0	187	45	0	0	0	1	3
d__Viruses|k__Shotokuvirae|p__Cossaviricota|c__Quintoviricetes|o__Piccovirales|f__Parvoviridae|g__Bocaparvovirus|s__Primate bocaparvovirus 2	Primate bocaparvovirus 2	0	0	0	0	106974	0	0	1	0	0	0	0	0	0	0	29	0	0	0	0	0	0	0	0	0	0	0	0	0	0	0	0	0	44	0	0	0	0	0	23	0	0	0	0	0	0	0	0
d__Viruses|k__Heunggongvirae|p__Uroviricota|c__Caudoviricetes|f__Peduoviridae|g__Quadragintavirus|s__Quadragintavirus ev040	Quadragintavirus ev040	1380	2961	1303	1927	1635	2016	911	2041	1693	2244	1283	2730	1801	1530	1851	1161	1965	3332	1212	3009	3584	909	1580	2667	4583	147	1741	1367	1087	2777	1032	5036	923	1678	1452	31	1521	1639	1933	3146	3096	3666	2020	1572	1788	954	3072	3496
d__Viruses|k__Bamfordvirae|p__Preplasmiviricota|c__Tectiliviricetes|o__Rowavirales|f__Adenoviridae|g__Mastadenovirus|s__Human mastadenovirus C	Human mastadenovirus C	0	0	1	0	0	0	0	5389	0	0	8	0	0	66284	137	10	371	0	39	3	279	5	8	2	8	0	0	0	42	0	0	0	21	20	1	0	5	557	2	20	0	0	0	0	22	0	0	6231
d__Viruses|k__Shotokuvirae|p__Cossaviricota|c__Quintoviricetes|o__Piccovirales|f__Parvoviridae|g__Bocaparvovirus|s__Primate bocaparvovirus 1	Primate bocaparvovirus 1	0	0	0	0	62008	0	0	2	0	0	0	0	0	0	0	20	0	0	0	0	0	0	0	0	0	0	0	0	0	0	0	0	0	44	0	0	0	0	0	2	0	0	0	0	0	0	0	0
d__Viruses|k__Heunggongvirae|p__Uroviricota|c__Caudoviricetes|f__Peduoviridae|g__Wadgaonvirus|s__Wadgaonvirus wv5004651	Wadgaonvirus wv5004651	2745	215	1689	31	1166	231	1183	2675	1874	53	271	2134	455	1100	2697	597	3170	2840	1	3938	773	6133	1087	0	238	15	715	390	939	1168	98	183	1747	506	319	37	369	7	32	5683	368	187	2	0	4	948	114	144
d__Viruses|k__Bamfordvirae|p__Preplasmiviricota|c__Tectiliviricetes|o__Rowavirales|f__Adenoviridae|g__Mastadenovirus|s__Human mastadenovirus F	Human mastadenovirus F	0	0	16	0	0	0	0	0	0	0	0	0	0	0	0	0	0	0	3525	0	0	0	55	0	0	0	0	0	0	0	0	0	0	0	0	0	0	46681	0	0	0	0	0	0	0	0	0	0
d__Viruses|k__Heunggongvirae|p__Uroviricota|c__Caudoviricetes|g__Sawaravirus|s__Sawaravirus WGPS2	Sawaravirus WGPS2	2762	0	1712	46	6117	27	828	3387	2786	236	519	1043	590	216	1458	164	1227	5061	0	1754	416	4484	1486	0	141	26	384	147	1270	355	99	104	3337	266	251	25	73	19	19	3486	232	354	7	0	0	626	75	35
d__Viruses|k__Heunggongvirae|p__Uroviricota|c__Caudoviricetes|o__Crassvirales|f__Suoliviridae|g__Buchavirus|s__Buchavirus intestinalis	Buchavirus intestinalis	0	0	0	0	0	0	0	0	0	0	0	0	0	0	0	0	1	0	16438	0	0	0	0	1	0	87	1	25411	0	0	0	0	477	0	0	28	0	248	1	0	0	416	73	0	0	0	0	1
d__Viruses|k__Heunggongvirae|p__Uroviricota|c__Caudoviricetes|o__Crassvirales|f__Suoliviridae|g__Buchavirus|s__Buchavirus hiberniae	Buchavirus hiberniae	0	0	0	0	0	0	0	0	0	0	0	0	0	0	0	0	0	0	40264	0	0	46	0	0	0	1	0	318	0	0	0	2	2	0	0	7	0	40	0	0	0	80	19	0	0	20	0	0
d__Viruses|k__Heunggongvirae|p__Uroviricota|c__Caudoviricetes|f__Peduoviridae|g__Gemsvirus|s__Gemsvirus gv5004652	Gemsvirus gv5004652	2520	118	1009	54	848	267	1071	1584	1166	24	160	1439	376	382	2169	626	3194	1696	0	2458	606	3458	662	0	179	15	442	560	775	1075	107	421	1109	1294	248	13	487	11	13	5087	320	106	0	0	7	1705	131	86
d__Viruses|k__Heunggongvirae|p__Uroviricota|c__Caudoviricetes|g__Eponavirus|s__Eponavirus epona	Eponavirus epona	0	0	0	0	0	0	0	0	0	0	0	1	0	0	0	0	0	0	205	0	0	937	0	474	1	65	1356	0	18311	0	8	2	0	213	4	954	3	0	0	0	0	10790	1457	13	1680	593	0	397
d__Viruses|k__Heunggongvirae|p__Uroviricota|c__Caudoviricetes|o__Crassvirales|f__Intestiviridae|g__Carjivirus|s__Carjivirus communis	Carjivirus communis	0	0	3	0	0	0	0	0	0	0	0	2	0	0	0	0	0	0	0	0	1	0	0	1	0	0	0	0	0	0	0	0	25958	3350	2	5499	1564	0	0	0	0	0	0	0	0	0	0	213
d__Viruses|k__Heunggongvirae|p__Uroviricota|c__Caudoviricetes|g__Punavirus|s__Punavirus P1	Punavirus P1	2814	2	2030	1	989	6	128	1033	1094	166	82	336	133	3	2835	355	88	1112	1	700	252	16529	87	0	60	7	272	38	1866	20	126	194	401	195	104	8	28	16	42	40	88	90	3	0	24	316	45	8
d__Viruses|k__Heunggongvirae|p__Uroviricota|c__Caudoviricetes|g__Mushuvirus|s__Mushuvirus mushu	Mushuvirus mushu	0	2	1	0	1	0	0	0	0	2	0	2	0	1	0	5	0	0	756	1	3	0	1	1092	0	32	1	0	24128	0	449	2	0	658	16	7	127	14	2	0	0	6	2	2	2155	2859	0	2421
d__Viruses|k__Heunggongvirae|p__Uroviricota|c__Caudoviricetes|g__Marienburgvirus|s__Marienburgvirus BP4795	Marienburgvirus BP4795	333	0	809	61	25	14	676	991	729	0	0	2442	238	192	1580	143	1211	950	0	4667	728	4771	170	0	91	7	760	59	542	1022	65	64	587	248	272	30	17	4	12	7230	176	24	0	0	13	571	88	27
d__Viruses|k__Heunggongvirae|p__Uroviricota|c__Caudoviricetes|g__Bievrevirus|s__Bievrevirus bv4A7	Bievrevirus bv4A7	879	35	1934	20	58	186	1386	1455	988	25	892	1488	293	642	1927	361	1204	1540	0	2941	1054	2012	1057	0	59	9	410	172	945	1212	74	102	1038	534	262	17	49	2	67	802	407	123	0	0	17	733	252	23
d__Viruses|k__Heunggongvirae|p__Uroviricota|c__Caudoviricetes|o__Crassvirales|f__Suoliviridae|g__Birpovirus|s__Birpovirus hominis	Birpovirus hominis	0	0	0	0	1	2	0	0	0	0	0	1	0	0	1	0	0	0	12	0	0	0	0	1	0	26600	3	0	0	0	0	4	177	0	0	443	0	51	1	0	0	140	50	0	0	0	2	0
d__Viruses|k__Heunggongvirae|p__Uroviricota|c__Caudoviricetes|g__Punavirus|s__Punavirus RCS47	Punavirus RCS47	943	1433	1076	23	230	74	354	849	1505	1743	1480	562	230	49	1034	194	1247	1184	0	1058	326	3281	290	0	90	18	621	73	1443	189	91	154	676	400	195	21	17	58	9	598	128	313	26	0	17	621	208	52
d__Viruses|k__Shotokuvirae|p__Cossaviricota|c__Quintoviricetes|o__Piccovirales|f__Parvoviridae|g__Dependoparvovirus|s__Adeno-associated dependoparvovirus A	Adeno-associated dependoparvovirus A	0	0	0	0	0	0	0	25	0	0	0	0	0	0	0	0	0	0	0	0	2	0	0	0	0	0	0	0	0	0	0	0	0	0	0	0	0	24683	0	0	0	0	0	0	0	0	0	0
d__Viruses|k__Heunggongvirae|p__Uroviricota|c__Caudoviricetes|o__Crassvirales|f__Suoliviridae|g__Canhaevirus|s__Canhaevirus hiberniae	Canhaevirus hiberniae	0	0	0	0	0	1	0	1	0	0	1	0	0	0	0	3	2	0	2	0	0	0	0	0	0	23033	0	1	0	1	0	1	16	0	6	0	0	8	0	0	1	1	1	0	0	0	1	15
d__Viruses|k__Heunggongvirae|p__Uroviricota|c__Caudoviricetes|s__Escherichia phage TL-2011b	Escherichia phage TL-2011b	2861	43	602	17	462	100	1963	1179	697	0	0	884	729	238	792	642	1132	900	0	1351	200	1679	402	0	76	4	195	136	316	355	25	65	611	200	155	11	79	3	21	1468	102	66	0	0	5	410	61	46
d__Viruses|k__Heunggongvirae|p__Uroviricota|c__Caudoviricetes|g__Brigitvirus|s__Brigitvirus brigit	Brigitvirus brigit	0	0	8	0	0	12	0	0	0	0	0	0	0	0	0	0	0	0	57	0	0	0	20	323	0	56	0	2	0	1	414	3182	0	7	581	301	360	6	41	0	0	91	0	28	220	121	9	279
d__Viruses|k__Heunggongvirae|p__Uroviricota|c__Caudoviricetes|g__Nesevirus|s__Nesevirus nv2G7b	Nesevirus nv2G7b	485	0	1127	27	87	113	389	540	441	0	0	1897	57	88	435	260	1328	1237	0	3123	841	2086	752	0	184	13	98	45	1189	39	63	76	726	114	31	21	31	0	2	712	71	102	0	0	14	232	84	53
d__Viruses|k__Heunggongvirae|p__Uroviricota|c__Caudoviricetes|g__Marienburgvirus|s__Marienburgvirus JLK2012	Marienburgvirus JLK2012	465	2	482	6	67	31	513	723	623	10	7	1155	216	429	707	80	726	712	0	1694	193	1212	216	1	132	4	102	72	205	691	17	195	416	140	59	11	69	2	3	6026	148	36	2	0	0	321	45	23
d__Viruses|k__Heunggongvirae|p__Uroviricota|c__Caudoviricetes|s__Shigella phage SfIV	Shigella phage SfIV	715	65	274	2	1228	125	634	427	370	99	16	1170	77	24	675	14	2704	455	1	2225	365	4372	70	0	74	3	71	74	359	38	37	7	357	54	211	10	88	3	36	286	38	166	2	1	2	142	58	93
d__Viruses|k__Bamfordvirae|p__Nucleocytoviricota|c__Pokkesviricetes|o__Chitovirales|f__Poxviridae|g__Oryzopoxvirus|s__BeAn 58058 virus	BeAn 58058 virus	15	2078	34	4440	179	2	2	105	4	32	1	1081	0	15	18	4	4	1384	0	1982	5740	5	0	0	0	0	251	5	5	0	3	0	37	9	663	1	2	0	4	55	8	0	0	0	0	2	3	0
d__Viruses|k__Heunggongvirae|p__Uroviricota|c__Caudoviricetes|g__Glaedevirus|s__Glaedevirus gv2H10	Glaedevirus gv2H10	272	0	907	5	621	47	212	238	209	0	0	1586	24	293	1457	102	633	1615	0	2450	164	2021	608	1	25	4	221	163	382	38	25	245	949	356	52	10	131	4	10	549	40	31	0	0	4	570	18	36
d__Viruses|k__Heunggongvirae|p__Uroviricota|c__Caudoviricetes|g__Glaedevirus|s__Enterobacteria phage mEp460	Enterobacteria phage mEp460	5611	0	688	2	167	39	571	106	70	0	0	469	8	146	1621	134	875	397	0	753	120	2392	430	0	159	2	139	23	171	143	25	114	202	366	21	1	194	2	5	238	21	24	0	0	7	438	2	26
d__Viruses|k__Heunggongvirae|p__Uroviricota|c__Caudoviricetes|s__Lactobacillus phage phiadh	Lactobacillus phage phiadh	0	0	0	668	302	0	0	31	51	486	0	3820	0	0	0	1	0	9441	0	2	1273	0	0	0	26	0	0	0	0	0	0	0	10	0	0	0	0	0	0	0	244	0	0	0	0	0	0	0
d__Viruses|k__Heunggongvirae|p__Uroviricota|c__Caudoviricetes|g__Glaedevirus|s__Enterobacteria phage cdtI	Enterobacteria phage cdtI	3493	0	1049	4	163	13	577	210	215	6	0	449	53	717	1417	107	513	196	0	718	160	838	730	0	79	7	86	31	240	220	21	156	97	265	54	18	320	1	2	770	30	28	0	0	1	372	14	17
d__Viruses|k__Bamfordvirae|p__Preplasmiviricota|c__Tectiliviricetes|o__Rowavirales|f__Adenoviridae|g__Mastadenovirus|s__Human mastadenovirus D	Human mastadenovirus D	0	0	2	0	0	0	0	2	0	0	0	0	0	0	343	0	0	0	190	2489	0	0	0	0	0	0	0	0	0	0	0	0	0	0	0	3145	0	390	0	0	0	0	0	7997	1	0	0	0
d__Viruses|k__Heunggongvirae|p__Uroviricota|c__Caudoviricetes|o__Crassvirales|f__Suoliviridae|g__Birpovirus|s__Birpovirus hiberniae	Birpovirus hiberniae	0	0	0	0	0	1	0	0	0	0	0	0	4	0	0	0	1	0	31	0	1	0	4	0	0	13277	0	0	0	0	0	1	157	0	0	399	0	101	0	0	0	247	46	18	0	4	7	0
d__Viruses|k__Heunggongvirae|p__Uroviricota|c__Caudoviricetes|o__Crassvirales|f__Steigviridae|g__Kahnovirus|s__Kahnovirus copri	Kahnovirus copri	0	0	0	0	0	0	0	1	0	0	0	2	0	0	0	0	0	0	0	1	0	0	7	4120	0	0	0	0	0	0	0	0	0	0	0	0	0	0	15	0	0	0	0	8856	0	1180	0	0
d__Viruses|k__Heunggongvirae|p__Uroviricota|c__Caudoviricetes|g__Pankowvirus|s__Pankowvirus pv1717	Pankowvirus pv1717	525	0	383	12	229	55	314	606	521	0	1	645	166	150	832	146	651	591	0	1117	160	1231	235	0	65	4	140	95	253	328	22	84	332	137	46	9	36	0	2	2634	114	36	0	0	0	270	34	31
d__Viruses|k__Heunggongvirae|p__Uroviricota|c__Caudoviricetes|s__Lactobacillus phage KC5a	Lactobacillus phage KC5a	0	0	0	520	700	0	0	58	31	686	0	1240	0	0	0	0	1	8025	0	6	1736	0	2	0	144	0	0	0	0	0	0	0	26	0	0	0	0	0	2	0	55	0	0	0	0	0	0	0
d__Viruses|k__Heunggongvirae|p__Uroviricota|c__Caudoviricetes|g__Pankowvirus|s__Pankowvirus YYZ2008	Pankowvirus YYZ2008	515	23	321	7	271	41	380	525	405	15	20	697	174	235	683	118	655	702	0	1164	146	975	211	0	73	5	108	105	186	420	14	60	481	114	44	16	64	4	2	2645	103	49	0	0	4	280	35	16
d__Viruses|k__Heunggongvirae|p__Uroviricota|c__Caudoviricetes|g__Taranisvirus|s__Taranisvirus taranis	Taranisvirus taranis	0	0	613	0	0	10	0	0	0	0	0	0	0	0	0	0	0	0	878	0	0	0	300	441	0	9	315	1969	0	0	44	259	0	1142	193	151	263	823	0	358	2577	67	11	60	111	156	1	122
d__Viruses|k__Heunggongvirae|p__Uroviricota|c__Caudoviricetes|g__Jouyvirus|s__Jouyvirus jv1H12	Jouyvirus jv1H12	176	0	294	2	257	74	222	4013	3360	0	39	269	16	91	790	94	303	28	0	416	146	121	260	0	65	8	23	12	185	113	7	34	89	20	14	10	88	4	9	613	105	9	0	0	2	83	25	15
d__Viruses|k__Heunggongvirae|p__Uroviricota|c__Caudoviricetes|o__Crassvirales|f__Intestiviridae|g__Carjivirus|s__Carjivirus hominis	Carjivirus hominis	0	0	1	0	0	0	0	0	0	0	0	0	1	0	0	0	0	0	0	0	0	0	0	0	0	0	0	0	0	1	0	0	9377	824	0	1535	375	1	0	0	0	0	0	0	0	0	1	31
d__Viruses|k__Heunggongvirae|p__Uroviricota|c__Caudoviricetes|s__Bacteroides phage B40-8	Bacteroides phage B40-8	0	0	11	0	0	0	0	0	0	0	0	0	0	0	0	0	0	0	1	0	0	3	0	1	0	46	0	165	0	0	0	0	4	22	0	0	1	11029	0	0	0	0	0	2	2	0	0	0
d__Viruses|k__Heunggongvirae|p__Uroviricota|c__Caudoviricetes|s__Lactobacillus phage phi jlb1	Lactobacillus phage phi jlb1	0	0	2	621	639	0	0	32	36	481	0	915	0	0	0	0	1	5416	0	0	1535	0	0	0	145	0	0	0	0	0	0	0	19	0	0	0	0	0	0	0	23	0	0	0	0	0	0	0
d__Viruses|k__Heunggongvirae|p__Uroviricota|c__Caudoviricetes|g__Toutatisvirus|s__Toutatisvirus toutatis	Toutatisvirus toutatis	2	0	448	0	0	207	0	0	0	0	0	0	0	0	0	0	0	0	137	0	5	25	512	342	0	16	557	24	608	0	182	225	0	151	18	398	135	146	51	339	2597	565	72	237	97	271	23	522
d__Viruses|k__Heunggongvirae|p__Uroviricota|c__Caudoviricetes|g__Alegriavirus|s__Alegriavirus av2B8	Alegriavirus av2B8	304	0	243	10	42	32	360	208	161	0	1	229	17	392	331	51	624	292	0	436	267	948	146	0	21	2	97	27	458	415	29	180	181	169	41	1	145	0	7	2117	41	29	0	0	1	205	28	11
d__Viruses|k__Heunggongvirae|p__Uroviricota|c__Caudoviricetes|f__Peduoviridae|g__Peduovirus|s__Peduovirus fiAA91ss	Peduovirus fiAA91ss	332	0	375	54	886	24	49	1733	1340	15	0	0	2	63	528	167	4	545	0	20	310	1335	8	0	23	6	3	16	635	15	70	51	346	64	23	0	8	0	13	0	139	4	0	0	7	52	4	0
d__Viruses|k__Heunggongvirae|p__Uroviricota|c__Caudoviricetes|o__Crassvirales|f__Suoliviridae|g__Blohavirus|s__Blohavirus faecalis	Blohavirus faecalis	0	1	0	0	0	0	0	0	0	0	0	0	0	0	0	2	0	0	176	2	0	0	0	0	0	6270	0	3	0	0	0	0	327	0	0	2427	0	3	0	0	0	45	11	0	0	0	0	0
d__Viruses|k__Heunggongvirae|p__Uroviricota|c__Caudoviricetes|g__Lambdavirus|s__Escherichia virus DE3	Escherichia virus DE3	466	0	284	12	226	49	253	497	417	140	3	452	114	109	529	129	561	509	0	614	108	970	196	0	50	3	141	60	204	170	18	41	323	96	20	6	31	6	14	727	68	59	4	0	3	192	23	33
d__Viruses|k__Heunggongvirae|p__Uroviricota|c__Caudoviricetes|s__Escherichia phage D6	Escherichia phage D6	463	117	309	10	260	71	207	411	333	23	147	357	82	84	527	131	469	460	0	587	149	813	199	2	30	4	125	66	279	189	18	75	277	91	41	6	40	1	6	719	76	27	1	0	9	157	24	25
d__Viruses|k__Heunggongvirae|p__Uroviricota|c__Caudoviricetes|o__Crassvirales|f__Intestiviridae|g__Jahgtovirus|s__Jahgtovirus secundus	Jahgtovirus secundus	0	0	0	0	0	0	0	0	0	0	0	0	0	0	0	0	0	0	0	0	2	8478	0	56	0	0	0	64	0	20	0	0	0	10	0	0	0	0	0	0	0	1	1	0	0	0	0	0
d__Viruses|k__Heunggongvirae|p__Uroviricota|c__Caudoviricetes|s__Streptococcus phage 20617	Streptococcus phage 20617	119	290	208	42	1735	36	86	512	57	187	32	641	12	54	632	43	15	895	2	56	155	35	34	19	33	53	39	15	368	16	9	7	5	24	103	1	1	6	16	641	66	1	0	5	13	28	36	16
d__Viruses|k__Heunggongvirae|p__Uroviricota|c__Caudoviricetes|g__Punavirus|s__Punavirus SJ46	Punavirus SJ46	85	0	1032	6	52	12	35	201	158	193	13	81	27	36	681	75	247	205	0	155	117	751	128	0	22	3	41	39	1015	120	57	162	160	70	3	5	7	9	5	405	49	49	5	0	12	111	55	7
d__Viruses|k__Heunggongvirae|p__Uroviricota|c__Caudoviricetes|g__Traversvirus|s__Traversvirus tv86	Traversvirus tv86	21	0	237	6	7	35	363	165	126	0	0	351	24	8	324	11	590	307	0	462	69	431	97	0	33	2	84	38	102	50	19	91	188	278	50	10	2	2	0	1371	92	17	0	0	0	351	17	12
d__Viruses|k__Heunggongvirae|p__Uroviricota|c__Caudoviricetes|s__Enterobacteria phage phiP27	Enterobacteria phage phiP27	28	0	274	3	17	28	701	45	29	0	0	64	4	176	664	57	74	40	0	171	711	78	39	0	8	0	11	44	1436	51	78	13	25	270	312	2	2	0	15	221	144	12	0	0	8	351	129	3
d__Viruses|k__Heunggongvirae|p__Uroviricota|c__Caudoviricetes|g__Uetakevirus|s__Uetakevirus phiV10	Uetakevirus phiV10	2676	113	12	0	0	5	1760	223	13	0	0	0	389	3	7	773	4	20	0	0	6	66	4	0	11	0	8	0	3	0	0	3	47	0	122	0	1	0	0	0	0	8	0	0	0	14	1	0
d__Viruses|k__Heunggongvirae|p__Uroviricota|c__Caudoviricetes|s__Enterobacteria phage SfV	Enterobacteria phage SfV	96	0	87	0	460	53	113	2	0	0	0	678	10	40	164	11	1959	221	0	1266	258	262	1	0	19	1	29	2	78	0	7	0	159	14	9	3	65	0	4	0	10	39	2	0	0	21	66	54
d__Viruses|k__Heunggongvirae|p__Uroviricota|c__Caudoviricetes|g__Nesevirus|s__Nesevirus ev243	Nesevirus ev243	226	0	160	1	173	38	664	419	352	0	0	110	217	71	367	42	170	167	0	181	265	1028	133	0	65	4	38	21	369	34	32	15	152	48	49	2	39	0	8	213	79	12	0	0	0	69	54	2
d__Viruses|k__Heunggongvirae|p__Uroviricota|c__Caudoviricetes|g__Lederbergvirus|s__Salmonella phage SEN22	Salmonella phage SEN22	315	59	98	0	315	22	128	183	169	116	129	548	38	39	239	42	259	482	0	935	32	712	70	0	10	0	150	76	141	40	19	10	252	26	9	1	2	9	4	89	0	25	3	0	0	31	8	12
d__Viruses|k__Heunggongvirae|p__Uroviricota|c__Caudoviricetes|o__Crassvirales|f__Suoliviridae|g__Blohavirus|s__Blohavirus americanus	Blohavirus americanus	0	0	0	0	0	0	0	0	2	0	0	2	1	0	0	0	0	0	255	1	0	0	5	0	0	2474	0	28	0	0	0	1	34	0	0	2192	1	0	1	1	0	210	447	1	0	61	1	1
d__Viruses|k__Heunggongvirae|p__Uroviricota|c__Caudoviricetes|o__Crassvirales|f__Suoliviridae|g__Burzaovirus|s__Burzaovirus intestinihominis	Burzaovirus intestinihominis	0	0	0	0	0	0	0	0	0	0	0	0	0	0	0	0	0	0	0	0	1	0	0	0	0	0	0	0	0	0	0	0	0	2140	0	12	136	0	0	0	0	0	0	3166	11	48	0	0
d__Viruses|k__Heunggongvirae|p__Uroviricota|c__Caudoviricetes|f__Peduoviridae|g__Reipivirus|s__Reipivirus ST16OXA48phi54	Reipivirus ST16OXA48phi54	4	4994	0	0	0	0	0	0	0	86	231	0	0	0	14	0	0	58	0	15	4	14	0	0	0	0	0	0	21	0	0	0	0	0	0	0	0	1	0	0	0	4	0	0	0	0	0	0
d__Viruses|k__Heunggongvirae|p__Uroviricota|c__Caudoviricetes|s__Enterobacteria phage SfI	Enterobacteria phage SfI	5	0	174	0	328	71	2	64	63	0	0	481	8	20	23	72	2006	113	0	918	239	43	82	0	5	2	25	1	77	12	4	4	103	2	13	2	46	0	13	0	0	63	0	0	2	8	23	82
d__Viruses|k__Heunggongvirae|p__Uroviricota|c__Caudoviricetes|g__Oengusvirus|s__Oengusvirus oengus	Oengusvirus oengus	34	0	11	0	0	0	0	0	0	0	0	0	0	0	0	0	0	0	129	0	0	0	5	91	0	9	11	111	1	0	62	91	0	458	40	64	76	2	1	336	2784	335	63	18	21	94	0	101
d__Viruses|k__Heunggongvirae|p__Uroviricota|c__Caudoviricetes|o__Crassvirales|f__Suoliviridae|g__Buchavirus|s__Buchavirus hominis	Buchavirus hominis	50	0	30	0	0	20	0	0	1	1	0	1	107	4	0	0	101	1	3237	0	0	74	31	14	19	37	57	389	2	53	75	11	224	17	4	19	37	70	2	0	0	52	54	0	4	2	128	11
d__Viruses|k__Heunggongvirae|p__Uroviricota|c__Caudoviricetes|o__Crassvirales|f__Steigviridae|g__Kehishuvirus|s__Kehishuvirus splanchnicus	Kehishuvirus splanchnicus	0	0	0	0	0	0	0	0	0	0	0	0	5	0	0	0	2	0	0	0	0	0	2	151	0	0	3071	0	0	2	0	2	711	0	2	0	0	210	0	0	0	523	74	169	6	14	8	2
d__Viruses|k__Heunggongvirae|p__Uroviricota|c__Caudoviricetes|f__Peduoviridae|g__Elveevirus|s__Elveevirus 4LV2017	Elveevirus 4LV2017	133	29	94	1	11	4	22	19	16	6	50	29	11	323	580	12	33	126	0	92	122	57	16	0	3	2	51	50	20	472	16	6	25	7	23	0	56	2	0	2344	1	3	0	0	0	22	0	0
d__Viruses|k__Heunggongvirae|p__Uroviricota|c__Caudoviricetes|g__Oslovirus|s__Oslovirus PA2	Oslovirus PA2	269	27	167	5	130	27	116	277	211	6	33	239	52	56	255	81	280	270	0	415	68	470	118	0	28	0	75	31	97	96	10	16	170	48	20	3	17	0	3	397	33	25	0	0	3	106	11	5
d__Viruses|k__Heunggongvirae|p__Uroviricota|c__Caudoviricetes|f__Peduoviridae|g__Xuanwuvirus|s__Xuanwuvirus xv520873	Xuanwuvirus xv520873	209	14	115	7	108	24	119	246	157	4	9	200	40	62	315	83	397	280	0	397	82	743	87	0	13	0	38	37	100	79	23	19	178	37	71	5	19	2	0	271	46	27	0	0	2	73	9	14
d__Viruses|k__Heunggongvirae|p__Uroviricota|c__Caudoviricetes|s__Enterobacteria phage P4	Enterobacteria phage P4	5	0	554	0	0	3	52	0	2	12	62	0	337	8	5	257	2134	13	0	32	166	493	13	0	14	0	11	2	0	247	66	0	84	0	68	0	13	11	2	0	2	2	0	0	12	3	0	70
d__Viruses|k__Heunggongvirae|p__Uroviricota|c__Caudoviricetes|f__Peduoviridae|s__Escherichia phage Cartapus	Escherichia phage Cartapus	127	0	67	0	0	2	0	18	14	0	1	17	0	372	703	6	0	133	0	62	166	0	15	0	8	0	48	44	7	411	17	2	1	7	51	0	106	2	0	2205	0	2	0	0	0	6	0	2
d__Viruses|k__Heunggongvirae|p__Uroviricota|c__Caudoviricetes|s__Lactobacillus prophage Lj771	Lactobacillus prophage Lj771	0	0	0	247	327	0	0	13	17	220	0	394	2	0	0	0	0	2590	0	2	712	0	1	0	66	0	0	0	0	0	0	0	5	0	0	0	0	0	0	0	20	0	0	0	0	0	0	0
d__Viruses|k__Heunggongvirae|p__Uroviricota|c__Caudoviricetes|f__Peduoviridae|g__Xuanwuvirus|s__Xuanwuvirus P88	Xuanwuvirus P88	11	0	8	31	0	12	11	25	20	0	0	46	15	14	991	99	1609	20	0	85	241	0	14	0	3	0	9	72	233	0	34	126	191	0	36	0	20	3	0	64	210	1	0	0	0	1	3	31
d__Viruses|k__Heunggongvirae|p__Uroviricota|c__Caudoviricetes|f__Peduoviridae|g__Xuanwuvirus|s__Xuanwuvirus P884B11	Xuanwuvirus P884B11	0	0	49	19	0	6	0	0	0	0	0	1	7	0	839	270	1538	3	0	15	257	0	50	0	0	0	8	53	192	0	28	48	194	0	35	5	8	4	0	389	196	11	0	0	0	11	0	36
d__Viruses|k__Heunggongvirae|p__Uroviricota|c__Caudoviricetes|g__Pankowvirus|s__Pankowvirus WGPS6	Pankowvirus WGPS6	65	0	59	6	13	1	22	3	1	0	0	534	31	41	238	6	88	358	0	882	41	103	22	0	34	0	20	10	81	59	3	27	185	12	21	1	3	2	1	1246	47	10	0	0	0	74	11	1
d__Viruses|k__Heunggongvirae|p__Uroviricota|c__Caudoviricetes|g__Lederbergvirus|s__Enterobacteria phage Sf101	Enterobacteria phage Sf101	46	0	15	0	0	2	3209	129	0	0	0	1	1	0	24	1	0	231	0	6	0	3	7	0	8	0	49	0	3	15	0	0	140	0	1	35	0	0	0	91	8	18	0	0	0	256	1	0
d__Viruses|k__Heunggongvirae|p__Uroviricota|c__Caudoviricetes|o__Crassvirales|f__Intestiviridae|g__Jahgtovirus|s__Jahgtovirus intestinihominis	Jahgtovirus intestinihominis	0	1	0	0	0	0	0	0	0	0	0	0	0	0	0	0	0	0	0	0	0	3899	10	31	0	1	0	331	0	5	1	0	2	5	0	2	0	0	0	0	0	0	0	0	0	1	0	4
d__Viruses|k__Heunggongvirae|p__Uroviricota|c__Caudoviricetes|g__Lughvirus|s__Lughvirus lugh	Lughvirus lugh	5	0	618	0	0	10	0	0	0	0	0	0	0	0	0	0	0	0	521	0	0	1	201	324	0	5	8	0	82	6	94	65	0	87	2	12	79	251	13	72	736	136	24	35	61	130	1	165
d__Viruses|k__Heunggongvirae|p__Uroviricota|c__Caudoviricetes|s__Shigella phage SfII	Shigella phage SfII	263	17	83	0	290	49	49	3	0	0	0	258	1	25	94	7	1160	276	0	523	91	225	0	0	24	0	15	1	70	0	7	1	201	4	6	1	99	0	5	0	4	37	0	0	3	2	7	44
d__Viruses|k__Bamfordvirae|p__Preplasmiviricota|c__Tectiliviricetes|o__Rowavirales|f__Adenoviridae|g__Mastadenovirus|s__Simian mastadenovirus F	Simian mastadenovirus F	0	0	3	0	0	0	0	1	0	0	0	0	0	0	0	0	0	0	294	0	0	0	6	0	0	0	0	0	0	0	0	0	0	0	0	0	0	3646	0	0	0	0	0	0	0	0	0	0
d__Viruses|k__Heunggongvirae|p__Uroviricota|c__Caudoviricetes|g__Cronusvirus|s__Cronusvirus cronus	Cronusvirus cronus	74	115	46	90	43	85	22	55	94	50	36	103	120	28	50	41	78	86	19	118	142	45	100	115	149	5	128	34	27	110	31	215	46	56	62	1	54	74	84	157	128	150	78	63	33	39	194	191
d__Viruses|k__Heunggongvirae|p__Uroviricota|c__Caudoviricetes|s__Bacteroides phage B124-14	Bacteroides phage B124-14	0	0	42	0	0	0	0	0	0	0	0	0	794	0	0	0	0	0	30	0	0	8	0	5	0	25	1	97	0	0	50	25	23	36	12	0	15	2479	0	0	0	0	0	1	0	1	0	13
d__Viruses|k__Heunggongvirae|p__Uroviricota|c__Caudoviricetes|o__Crassvirales|f__Intestiviridae|g__Fohxhuevirus|s__Fohxhuevirus gastrointestinalis	Fohxhuevirus gastrointestinalis	0	0	22	0	0	0	0	0	0	0	0	0	0	13	0	0	1	0	154	0	7	52	39	95	0	3	0	5	0	2187	116	163	22	40	39	22	150	4	159	0	0	9	3	89	14	147	0	29
d__Viruses|k__Heunggongvirae|p__Uroviricota|c__Caudoviricetes|g__Lederbergvirus|s__Lederbergvirus HK620	Lederbergvirus HK620	6	0	2	0	0	1	2694	73	2	0	0	33	16	0	2	0	82	232	0	41	5	2	5	0	26	0	25	0	1	0	0	3	116	2	0	12	5	0	0	0	0	15	0	0	0	86	0	4
d__Viruses|k__Heunggongvirae|p__Uroviricota|c__Caudoviricetes|g__Oslovirus|s__Oslovirus ArgO145	Oslovirus ArgO145	80	0	111	4	0	0	134	214	173	0	0	284	147	79	64	59	527	51	0	548	123	477	117	0	3	0	9	14	12	7	8	6	55	1	8	2	1	0	0	1	8	5	0	0	0	33	10	19
d__Viruses|k__Heunggongvirae|p__Uroviricota|c__Caudoviricetes|g__Lederbergvirus|s__Lederbergvirus Sf6	Lederbergvirus Sf6	39	0	67	1	49	13	543	104	49	0	0	364	22	41	25	37	179	419	0	638	26	134	83	0	26	0	13	6	8	2	0	6	335	6	0	16	2	0	1	0	2	11	0	0	1	117	7	7
d__Viruses|k__Heunggongvirae|p__Uroviricota|c__Caudoviricetes|g__Jacevirus|s__Jacevirus jace	Jacevirus jace	0	193	28	298	83	53	287	203	160	89	226	82	46	73	100	149	27	65	12	30	3	0	4	20	186	25	1	107	78	7	18	7	8	21	63	30	0	34	9	62	43	40	13	0	22	6	0	24
d__Viruses|k__Heunggongvirae|p__Uroviricota|c__Caudoviricetes|f__Peduoviridae|g__Peduovirus|s__Peduovirus P2	Peduovirus P2	444	0	41	0	0	5	0	0	0	0	0	0	3	156	678	110	146	38	0	0	47	0	28	0	37	0	10	12	93	2	40	50	12	148	5	0	43	0	7	442	73	44	0	0	0	159	0	3
d__Viruses|k__Heunggongvirae|p__Uroviricota|c__Caudoviricetes|o__Crassvirales|f__Suoliviridae|g__Aurodevirus|s__Aurodevirus hiberniae	Aurodevirus hiberniae	0	3	1	0	0	0	1	0	1	0	0	0	0	0	0	0	0	0	235	0	1	0	1	1	0	197	0	1	0	0	0	2	1239	0	0	12	0	422	0	0	0	665	138	0	0	0	0	3
d__Viruses|k__Heunggongvirae|p__Uroviricota|c__Caudoviricetes|g__Aurunvirus|s__Aurunvirus STIM5	Aurunvirus STIM5	0	110	31	129	71	41	172	241	163	77	207	114	50	96	88	94	45	63	7	38	15	3	28	7	188	36	7	95	101	15	14	32	13	59	70	6	8	20	7	43	35	36	10	1	24	24	0	13
d__Viruses|k__Heunggongvirae|p__Uroviricota|c__Caudoviricetes|o__Crassvirales|f__Suoliviridae|g__Buchavirus|s__Buchavirus oralis	Buchavirus oralis	0	0	0	0	0	0	0	0	0	0	0	3	0	0	0	0	0	0	2540	0	0	30	0	2	0	32	0	140	0	0	0	4	1	0	0	4	0	0	0	0	0	0	0	1	0	0	50	0
d__Viruses|k__Heunggongvirae|p__Uroviricota|c__Caudoviricetes|g__Pankowvirus|s__Pankowvirus WGPS8	Pankowvirus WGPS8	30	0	81	3	0	2	148	96	77	0	0	63	82	50	132	7	121	99	0	115	55	286	29	0	22	1	23	21	72	76	6	31	73	35	9	2	10	0	0	770	27	6	0	0	0	59	11	1
d__Viruses|k__Heunggongvirae|p__Uroviricota|c__Caudoviricetes|o__Crassvirales|f__Steigviridae|g__Kahnovirus|s__Kahnovirus oralis	Kahnovirus oralis	0	0	0	0	0	0	0	0	0	0	0	1	0	0	0	0	0	0	0	1	0	0	0	1364	0	0	0	1	0	0	0	1	0	0	0	0	0	0	3	1	0	0	0	1088	0	273	0	0
d__Viruses|k__Heunggongvirae|p__Uroviricota|c__Caudoviricetes|o__Crassvirales|f__Suoliviridae|g__Burzaovirus|s__Burzaovirus coli	Burzaovirus coli	0	0	0	0	0	0	0	0	0	0	0	0	0	0	0	0	0	1	1	0	0	0	0	0	0	1	0	0	0	0	0	0	0	950	0	4	59	0	0	0	0	0	0	1531	56	13	0	1
d__Viruses|k__Heunggongvirae|p__Uroviricota|c__Caudoviricetes|f__Kyanoviridae|g__Sokavirus|s__Synechococcus phage S-SZBM1	Synechococcus phage S-SZBM1	59	122	47	36	632	3	31	188	29	123	24	179	7	18	51	21	16	259	12	26	81	14	11	9	18	4	20	5	57	8	12	3	10	14	49	1	2	4	17	230	79	0	2	1	5	9	17	5
d__Viruses|k__Heunggongvirae|p__Uroviricota|c__Caudoviricetes|f__Peduoviridae|g__Gegavirus|s__Gegavirus ST15OXA48phi141	Gegavirus ST15OXA48phi141	20	107	1	0	0	0	21	0	0	23	1953	0	4	10	201	2	0	5	0	8	0	6	0	0	0	0	1	2	5	2	0	0	0	0	1	0	1	3	0	15	0	0	0	0	0	0	0	0
d__Viruses|k__Heunggongvirae|p__Uroviricota|c__Caudoviricetes|o__Crassvirales|f__Intestiviridae|g__Jahgtovirus|s__Jahgtovirus gastrointestinalis	Jahgtovirus gastrointestinalis	0	0	0	0	0	0	0	0	0	0	0	0	0	0	0	0	0	1	0	0	0	2323	0	18	0	0	0	0	0	0	0	0	0	0	0	0	0	0	0	1	0	1	0	0	0	0	0	0
d__Viruses|k__Heunggongvirae|p__Uroviricota|c__Caudoviricetes|s__Salmonella phage SSU5	Salmonella phage SSU5	0	1740	0	0	0	237	0	0	0	27	2	1	0	1	1	0	0	3	0	0	2	0	1	0	97	0	0	0	207	1	0	0	0	0	0	0	0	0	0	4	0	0	0	0	0	0	0	0
d__Viruses|k__Heunggongvirae|p__Uroviricota|c__Caudoviricetes|s__Gordonia phage Neville	Gordonia phage Neville	1	83	20	25	76	28	240	186	171	77	182	78	64	60	95	96	47	51	0	32	8	2	1	0	231	16	2	98	72	6	13	0	5	30	43	0	0	0	8	30	25	29	12	0	13	5	0	0
d__Viruses|k__Heunggongvirae|p__Uroviricota|c__Caudoviricetes|o__Crassvirales|f__Suoliviridae|g__Buchavirus|s__Buchavirus splanchnicus	Buchavirus splanchnicus	0	0	0	0	0	0	0	0	0	0	0	0	0	0	0	0	0	0	1912	0	0	0	0	0	0	54	0	103	0	0	0	0	70	0	0	2	0	54	0	0	0	84	13	0	0	0	0	0
d__Viruses|k__Heunggongvirae|p__Uroviricota|c__Caudoviricetes|o__Crassvirales|f__Suoliviridae|g__Buchavirus|s__Buchavirus copri	Buchavirus copri	0	0	2	0	0	0	0	0	0	0	0	0	0	0	0	0	0	0	1310	0	0	13	0	0	0	3	0	220	0	1	0	0	477	1	1	5	0	59	0	0	1	77	14	2	0	10	22	0
d__Viruses|k__Heunggongvirae|p__Uroviricota|c__Caudoviricetes|f__Peduoviridae|g__Gegevirus|s__Gegevirus ST437OXA245phi41	Gegevirus ST437OXA245phi41	45	468	1	0	0	0	6	0	0	153	1231	0	2	12	114	3	0	2	0	2	2	62	0	0	0	0	0	5	33	3	0	1	0	5	0	0	1	12	1	25	0	10	0	0	0	19	0	0
d__Viruses|k__Heunggongvirae|p__Uroviricota|c__Caudoviricetes|s__Enterococcus phage EF62phi	Enterococcus phage EF62phi	0	0	0	0	2	0	58	0	0	1053	0	18	0	2	444	9	43	166	0	0	0	0	0	0	0	0	0	0	0	0	0	0	0	0	0	0	0	0	0	0	0	0	0	0	0	0	0	0
d__Viruses|k__Heunggongvirae|p__Uroviricota|c__Caudoviricetes|f__Zierdtviridae|g__Ceetrepovirus|s__Corynebacterium virus Darwin	Corynebacterium virus Darwin	96	100	79	2	46	9	54	105	80	27	119	76	14	24	102	24	111	116	0	170	24	194	38	0	7	1	33	13	47	46	3	7	78	27	2	2	11	1	0	162	16	6	2	0	3	43	9	3
d__Viruses|k__Heunggongvirae|p__Uroviricota|c__Caudoviricetes|f__Peduoviridae|g__Vimunumvirus|s__Vimunumvirus ST147VIM1phi71	Vimunumvirus ST147VIM1phi71	82	220	56	0	42	11	51	68	55	118	221	72	16	23	104	33	91	100	0	93	18	171	36	0	6	0	17	9	60	23	5	5	41	21	2	0	8	7	1	95	38	36	1	0	1	31	8	5
d__Viruses|k__Heunggongvirae|p__Uroviricota|c__Caudoviricetes|g__Diegovirus|s__Diegovirus dv7502Stx	Diegovirus dv7502Stx	34	0	63	2	6	4	131	98	72	0	14	148	25	35	50	13	160	59	0	307	30	99	50	0	8	2	16	1	17	54	2	10	25	28	20	1	1	0	0	427	3	8	0	0	0	50	6	11
d__Viruses|k__Loebvirae|p__Hofneiviricota|c__Faserviricetes|o__Tubulavirales|f__Inoviridae|g__Infulavirus|s__Infulavirus If1	Infulavirus If1	5	0	120	0	22	16	0	119	117	0	0	71	9	24	93	29	182	124	0	102	30	323	88	0	9	0	11	19	24	57	1	11	62	24	0	5	8	1	0	251	16	20	0	0	0	60	7	3
d__Viruses|k__Heunggongvirae|p__Uroviricota|c__Caudoviricetes|o__Crassvirales|f__Steigviridae|g__Paundivirus|s__Paundivirus hollandii	Paundivirus hollandii	0	0	0	0	0	0	0	0	0	0	1	0	0	0	0	0	0	0	0	1	0	0	22	1028	0	0	27	1	0	0	0	0	0	12	0	0	0	0	12	1	0	0	0	772	9	119	2	1
d__Viruses|k__Heunggongvirae|p__Uroviricota|c__Caudoviricetes|g__Traversvirus|s__Traversvirus PA28	Traversvirus PA28	8	0	35	0	0	2	11	82	90	0	0	91	19	4	47	0	161	116	0	191	21	6	19	0	1	1	52	4	13	103	1	5	63	24	13	2	1	0	0	683	5	0	0	0	0	48	0	3
d__Viruses|k__Heunggongvirae|p__Uroviricota|c__Caudoviricetes|o__Crassvirales|f__Suoliviridae|g__Burzaovirus|s__Burzaovirus faecalis	Burzaovirus faecalis	2	0	0	0	0	0	0	0	0	0	0	0	0	0	0	0	0	0	0	0	0	0	0	0	0	0	0	0	0	0	0	0	0	684	0	3	27	0	0	0	0	0	0	1189	15	16	0	0
d__Viruses|k__Heunggongvirae|p__Uroviricota|c__Caudoviricetes|f__Peduoviridae|g__Dagavirus|s__Dagavirus ST13OXA48phi121	Dagavirus ST13OXA48phi121	50	248	4	0	15	2	5	26	23	54	965	27	1	3	180	6	16	15	0	34	12	53	0	0	2	0	2	7	38	13	0	1	14	2	3	1	6	2	0	75	1	5	2	0	0	6	0	2
d__Viruses|k__Heunggongvirae|p__Uroviricota|c__Caudoviricetes|g__Erskinevirus|s__Erskinevirus EaH2	Erskinevirus EaH2	3	11	59	3	26	32	2	10	0	1	5	12	198	15	4	0	139	11	29	11	2	95	40	32	5	34	114	61	0	108	67	35	96	31	8	2	52	78	10	10	2	65	67	1	0	1	127	36
d__Viruses|k__Heunggongvirae|p__Uroviricota|c__Caudoviricetes|f__Peduoviridae|g__Quadragintavirus|s__Quadragintavirus ev015	Quadragintavirus ev015	0	0	0	1257	0	0	0	0	0	0	0	22	0	146	5	0	228	0	0	0	9	0	0	0	0	0	89	0	0	0	0	0	7	0	0	0	0	0	0	0	0	0	0	0	0	0	99	12
d__Viruses|k__Heunggongvirae|p__Uroviricota|c__Caudoviricetes|s__Enterobacter phage vB_EclS_CobraSix	Enterobacter phage vB_EclS_CobraSix	19	22	0	0	0	5	14	4	2	1	313	1	2	0	1198	0	0	112	0	1	0	5	0	0	0	0	5	0	0	5	0	9	75	6	6	0	0	1	0	32	0	9	2	0	0	6	2	0
d__Viruses|k__Heunggongvirae|p__Uroviricota|c__Caudoviricetes|s__Escherichia phage HK639	Escherichia phage HK639	6	49	20	4	5	2	5	13	6	99	1061	13	1	6	309	8	12	11	0	56	5	36	8	0	3	0	1	2	8	4	2	7	17	3	2	1	2	2	0	15	3	5	2	0	0	7	0	1
d__Viruses|k__Heunggongvirae|p__Uroviricota|c__Caudoviricetes|f__Peduoviridae|g__Peduovirus|s__Peduovirus P24A7b	Peduovirus P24A7b	229	0	2	3	0	0	42	87	88	0	0	9	4	31	452	95	0	56	0	9	3	395	0	0	24	0	29	3	34	0	8	1	34	16	1	0	9	0	1	0	79	4	0	0	0	19	2	0
d__Viruses|k__Heunggongvirae|p__Uroviricota|c__Caudoviricetes|g__Ficleduovirus|s__Ficleduovirus FCV1	Ficleduovirus FCV1	37	63	22	77	34	33	7	28	15	20	8	65	58	5	13	4	52	70	7	67	175	8	40	61	37	2	45	8	14	36	12	98	12	30	26	0	36	30	33	51	43	46	31	32	9	15	74	65
d__Viruses|k__Heunggongvirae|p__Uroviricota|c__Caudoviricetes|g__Kwaitsingvirus|s__Kwaitsingvirus HK544	Kwaitsingvirus HK544	48	0	0	0	55	0	453	20	1	0	0	333	0	66	38	0	11	3	0	515	18	159	1	0	15	0	2	0	9	0	0	0	0	0	2	0	0	0	0	0	0	4	0	0	0	0	0	0
d__Viruses|k__Heunggongvirae|p__Uroviricota|c__Caudoviricetes|g__Traversvirus|s__Traversvirus F451	Traversvirus F451	32	0	55	0	0	0	773	4	1	0	48	109	2	12	30	8	32	36	0	192	48	45	13	0	0	0	13	0	32	46	1	5	17	57	12	3	3	0	0	1	9	0	0	0	1	54	32	1
d__Viruses|k__Heunggongvirae|p__Uroviricota|c__Caudoviricetes|g__Traversvirus|s__Traversvirus SH2026Stx1	Traversvirus SH2026Stx1	332	0	6	1	0	3	253	49	4	0	0	0	9	0	173	43	13	34	0	3	55	48	9	0	0	0	1	0	235	24	8	4	15	12	41	3	72	0	0	147	61	2	0	0	0	15	43	0
d__Viruses|k__Heunggongvirae|p__Uroviricota|c__Caudoviricetes|f__Peduoviridae|g__Kapieceevirus|s__Kapieceevirus ST512KPC3phi132	Kapieceevirus ST512KPC3phi132	28	0	11	0	0	0	5	0	0	0	804	0	0	71	134	0	0	23	0	0	25	0	0	0	0	0	14	12	0	65	10	0	0	0	21	0	26	5	0	386	0	2	0	0	0	1	0	0
d__Viruses|k__Heunggongvirae|p__Uroviricota|c__Caudoviricetes|g__Yautsimvirus|s__Yautsimvirus HK140	Yautsimvirus HK140	74	0	0	0	44	8	433	25	0	0	3	232	0	6	47	3	66	39	0	376	2	43	1	0	18	2	8	2	10	9	0	3	57	0	1	7	7	0	0	37	2	1	0	0	0	50	1	0
d__Viruses|k__Heunggongvirae|p__Uroviricota|c__Caudoviricetes|o__Crassvirales|f__Steigviridae|g__Pamirivirus|s__Pamirivirus faecium	Pamirivirus faecium	0	0	0	2	0	0	0	0	0	0	0	0	0	0	0	0	0	0	0	0	0	0	6	794	0	0	0	7	0	0	0	0	0	68	0	0	0	0	0	0	0	1	0	543	117	73	1	0
d__Viruses|k__Heunggongvirae|p__Uroviricota|c__Caudoviricetes|g__Oslovirus|s__Oslovirus TL2011	Oslovirus TL2011	3	0	52	1	27	10	36	44	29	0	0	80	29	21	74	19	33	67	0	86	7	108	40	0	9	0	31	11	20	42	4	12	60	36	19	4	7	0	0	445	13	6	0	0	0	64	5	1
d__Viruses|k__Heunggongvirae|p__Uroviricota|c__Caudoviricetes|s__Streptococcus phage YMC-2011	Streptococcus phage YMC-2011	23	5	65	1	0	9	11	9	2	5	0	190	0	6	55	36	0	1060	0	0	0	0	2	0	3	0	1	1	21	22	0	1	1	0	1	1	0	0	0	17	2	0	0	2	2	0	9	2
d__Viruses|k__Heunggongvirae|p__Uroviricota|c__Caudoviricetes|o__Crassvirales|f__Suoliviridae|g__Cohcovirus|s__Cohcovirus splanchnicus	Cohcovirus splanchnicus	0	1	0	0	0	0	0	0	1	0	0	0	0	0	0	0	0	0	2	0	1	44	1	5	0	964	0	0	0	0	28	5	142	1	1	2	7	33	1	0	0	57	33	0	0	0	61	132
d__Viruses|k__Heunggongvirae|p__Uroviricota|c__Caudoviricetes|g__Busanvirus|s__Busanvirus ACP17	Busanvirus ACP17	0	0	25	0	0	41	0	0	0	2	0	0	112	4	0	2	101	0	20	4	0	39	34	26	10	47	42	30	5	96	64	25	72	23	12	10	81	44	12	0	3	90	154	6	6	36	68	45
d__Viruses|k__Heunggongvirae|p__Uroviricota|c__Caudoviricetes|f__Peduoviridae|g__Peduovirus|s__Peduovirus magyaro	Peduovirus magyaro	127	14	39	0	41	6	17	62	53	2	35	49	8	79	119	33	52	65	0	69	31	114	25	0	8	0	13	6	81	27	38	14	31	37	5	1	45	0	7	97	12	11	0	0	0	25	5	4
d__Viruses|k__Heunggongvirae|p__Uroviricota|c__Caudoviricetes|s__Streptococcus phage EJ-1	Streptococcus phage EJ-1	4	370	6	13	330	2	107	308	19	13	77	41	7	23	2	4	2	75	0	22	20	10	2	0	0	0	6	2	6	4	1	0	2	3	13	0	0	2	0	22	0	0	0	0	0	0	0	0
d__Viruses|k__Heunggongvirae|p__Uroviricota|c__Caudoviricetes|g__Lederbergvirus|s__Enterobacteria phage IME10	Enterobacteria phage IME10	28	0	6	0	4	1	521	27	0	0	0	77	15	3	3	30	223	53	0	158	11	37	0	0	15	0	16	0	4	0	0	0	42	0	2	7	18	0	3	3	3	93	1	0	0	81	2	7
d__Viruses|k__Heunggongvirae|p__Uroviricota|c__Caudoviricetes|f__Casjensviridae|s__Ruegeria phage vB_RpoS-V18	Ruegeria phage vB_RpoS-V18	9	8	22	7	68	45	33	34	4	55	17	24	14	4	29	41	53	85	5	111	23	9	49	55	17	8	6	8	28	45	40	140	27	1	57	2	11	56	38	3	5	48	42	3	4	37	8	18
d__Viruses|k__Heunggongvirae|p__Uroviricota|c__Caudoviricetes|o__Crassvirales|f__Suoliviridae|g__Cohcovirus|s__Cohcovirus hiberniae	Cohcovirus hiberniae	0	0	0	1	0	1	0	0	0	0	0	0	1	0	0	0	0	0	1	0	0	0	0	4	5	1228	0	0	0	0	40	1	11	0	0	0	0	0	0	0	0	2	1	0	0	0	0	53
d__Viruses|k__Bamfordvirae|p__Preplasmiviricota|c__Tectiliviricetes|o__Rowavirales|f__Adenoviridae|g__Mastadenovirus|s__Simian mastadenovirus E	Simian mastadenovirus E	0	0	0	0	0	0	0	0	0	0	0	0	0	0	0	0	0	0	107	0	0	0	1	0	0	0	0	0	0	0	0	0	0	0	0	0	0	1223	0	0	0	0	0	0	0	0	0	0
d__Viruses|k__Heunggongvirae|p__Uroviricota|c__Caudoviricetes|f__Herelleviridae|g__Matervirus|s__Matervirus mater	Matervirus mater	12	0	73	0	5	9	0	0	139	32	0	16	5	86	23	47	15	5	7	7	5	0	80	17	0	5	42	14	23	21	4	4	31	10	129	12	6	22	38	204	57	13	6	6	6	14	4	13
d__Viruses|k__Pararnavirae|p__Artverviricota|c__Revtraviricetes|o__Ortervirales|f__Retroviridae|s__Human endogenous retrovirus K	Human endogenous retrovirus K	0	148	3	321	13	0	0	6	0	4	0	92	0	0	0	0	2	101	0	162	378	0	0	3	0	0	21	0	0	0	0	0	4	2	45	0	0	0	0	1	0	0	0	0	0	0	0	0
d__Viruses|k__Heunggongvirae|p__Uroviricota|c__Caudoviricetes|g__Wanchaivirus|s__Wanchaivirus HK106	Wanchaivirus HK106	94	0	5	0	60	3	497	18	0	0	0	21	3	7	4	5	365	11	0	35	19	25	0	0	5	0	36	0	23	0	1	0	25	1	0	0	6	0	0	0	0	4	0	0	0	7	0	19
d__Viruses|k__Heunggongvirae|p__Uroviricota|c__Caudoviricetes|f__Schitoviridae|g__Enquatrovirus|s__Enquatrovirus N4	Enquatrovirus N4	18	53	35	26	300	10	19	114	9	28	16	94	1	9	22	8	6	112	0	20	34	9	7	1	7	5	15	2	35	3	3	0	2	7	22	3	1	2	5	150	10	0	0	0	2	2	6	2
d__Viruses|k__Heunggongvirae|p__Uroviricota|c__Caudoviricetes|o__Crassvirales|f__Steigviridae|g__Mahlunavirus|s__Mahlunavirus rarus	Mahlunavirus rarus	0	0	0	0	0	1	0	0	1	0	0	1	1	4	0	0	0	0	10	1	0	0	5	796	0	0	0	0	1	1	0	0	0	0	3	0	0	1	20	2	2	0	0	318	5	65	0	1
d__Viruses|k__Heunggongvirae|p__Uroviricota|c__Caudoviricetes|g__Oslovirus|s__Oslovirus ov191	Oslovirus ov191	31	0	26	0	0	1	8	19	33	0	0	175	10	5	35	0	2	35	0	259	11	46	1	0	0	0	9	2	16	46	1	5	12	33	2	1	0	0	0	285	15	4	0	0	0	37	6	0
d__Viruses|k__Heunggongvirae|p__Uroviricota|c__Caudoviricetes|f__Autographiviridae|g__Cheungvirus|s__Cheungvirus NATL1A7	Cheungvirus NATL1A7	18	61	40	13	381	1	22	92	10	20	7	103	2	4	25	6	3	90	0	17	33	5	5	4	0	1	2	7	25	0	0	0	0	0	15	0	0	0	3	109	11	0	0	1	1	1	7	6
d__Viruses|k__Heunggongvirae|p__Uroviricota|c__Caudoviricetes|g__Moineauvirus|s__Streptococcus phage P7574	Streptococcus phage P7574	8	23	3	0	910	0	2	0	1	0	7	3	2	0	64	0	0	38	0	0	1	4	0	0	0	8	3	0	46	1	1	1	2	0	4	0	0	0	2	3	1	0	0	0	0	2	0	0
d__Viruses|k__Bamfordvirae|p__Preplasmiviricota|c__Tectiliviricetes|o__Rowavirales|f__Adenoviridae|g__Mastadenovirus|s__Human mastadenovirus A	Human mastadenovirus A	0	0	2	0	0	0	0	0	0	0	0	0	40	0	0	0	0	0	62	0	0	0	1	2	0	0	0	0	0	0	0	0	0	0	2	0	0	985	0	0	0	1	0	0	0	0	0	38
d__Viruses|k__Heunggongvirae|p__Uroviricota|c__Caudoviricetes|g__Lederbergvirus|s__Salmonella phage UPF_BP1	Salmonella phage UPF_BP1	39	0	2	0	0	0	505	51	0	5	0	44	2	0	2	3	1	146	0	74	2	3	0	0	10	0	2	0	3	10	0	0	102	0	5	12	1	0	0	39	0	8	0	0	0	32	0	0
d__Viruses|k__Heunggongvirae|p__Uroviricota|c__Caudoviricetes|f__Vilmaviridae|g__Bongovirus|s__Bongovirus reindeer	Bongovirus reindeer	0	3	0	0	121	4	339	148	176	1	5	1	0	2	78	21	7	3	0	0	12	0	0	0	0	1	0	32	48	0	0	0	0	11	44	0	0	2	0	5	0	1	0	0	0	0	0	0
d__Viruses|k__Heunggongvirae|p__Uroviricota|c__Caudoviricetes|g__Myrnavirus|s__Myrnavirus myrna	Myrnavirus myrna	0	16	17	4	53	11	130	123	73	33	48	50	6	11	42	57	19	11	0	12	29	1	8	0	42	16	1	58	51	5	0	4	7	14	32	0	2	4	8	16	3	10	7	0	6	4	0	0
d__Viruses|k__Heunggongvirae|p__Uroviricota|c__Caudoviricetes|g__Cuauhtlivirus|s__Cuauhtlivirus mEpX1	Cuauhtlivirus mEpX1	18	0	1	0	0	0	334	12	0	0	22	189	0	0	12	4	2	0	0	314	0	1	0	0	13	0	0	0	0	13	0	0	6	0	11	0	0	0	0	72	0	0	0	0	0	21	4	0
d__Viruses|k__Heunggongvirae|p__Uroviricota|c__Caudoviricetes|o__Crassvirales|f__Suoliviridae|g__Buorbuivirus|s__Buorbuivirus hominis	Buorbuivirus hominis	0	0	0	0	0	0	0	0	0	0	0	0	0	0	0	2	0	0	334	0	0	0	0	1	0	67	0	0	0	0	0	0	142	0	0	15	0	180	0	0	0	259	41	0	0	0	6	0
d__Viruses|k__Heunggongvirae|p__Uroviricota|c__Caudoviricetes|g__Lederbergvirus|s__Salmonella phage vB_SemP_Emek	Salmonella phage vB_SemP_Emek	1	0	2	0	0	1	732	29	0	0	0	0	0	5	11	0	0	112	0	15	0	0	0	0	11	0	7	0	0	5	0	0	60	0	3	1	3	0	0	0	1	16	0	0	0	10	2	1
d__Viruses|k__Heunggongvirae|p__Uroviricota|c__Caudoviricetes|s__Klebsiella phage phiKO2	Klebsiella phage phiKO2	23	487	0	0	0	0	4	0	0	6	220	0	0	0	14	0	0	0	0	0	54	14	1	0	0	0	0	0	148	0	2	10	0	0	0	0	0	6	0	0	0	0	0	0	0	0	0	0
d__Viruses|k__Heunggongvirae|p__Uroviricota|c__Caudoviricetes|g__Sherbrookevirus|s__Sherbrookevirus MMP04	Sherbrookevirus MMP04	14	0	0	0	0	0	0	0	0	0	0	0	0	0	0	1	0	0	0	258	0	10	0	0	0	0	7	0	0	0	0	0	0	0	0	0	3	1	0	0	0	0	0	0	0	1	18	0
d__Viruses|k__Heunggongvirae|p__Uroviricota|c__Caudoviricetes|f__Peduoviridae|g__Peduovirus|s__Peduovirus pro147	Peduovirus pro147	38	0	8	0	0	10	0	0	0	0	0	0	3	12	362	171	2	10	0	0	67	0	1	0	0	0	5	0	222	0	14	12	0	7	0	0	3	1	0	12	7	5	0	0	0	3	0	0
d__Viruses|k__Heunggongvirae|p__Uroviricota|c__Caudoviricetes|g__Brunovirus|s__Brunovirus SEN34	Brunovirus SEN34	284	71	2	0	0	2	0	0	4	41	66	0	0	0	5	118	19	0	0	0	22	88	13	1	29	3	62	0	3	0	0	0	0	0	0	0	0	0	1	0	0	44	0	0	0	0	38	0
d__Viruses|k__Heunggongvirae|p__Uroviricota|c__Caudoviricetes|f__Herelleviridae|g__Moonbeamvirus|s__Moonbeamvirus moonbeam	Moonbeamvirus moonbeam	0	12	49	4	69	1	0	7	0	135	1	305	0	1	13	9	15	38	1	1	53	0	2	2	0	0	21	1	9	2	4	1	13	0	30	0	3	1	4	20	43	1	3	2	3	2	10	3
d__Viruses|k__Heunggongvirae|p__Uroviricota|c__Caudoviricetes|s__Salmonella phage 118970_sal3	Salmonella phage 118970_sal3	38	0	7	0	53	4	0	0	0	11	25	104	0	2	9	3	271	62	0	170	10	57	0	1	0	1	8	0	12	0	1	0	11	0	0	0	15	0	0	0	0	3	0	0	0	1	0	13
d__Viruses|k__Heunggongvirae|p__Uroviricota|c__Caudoviricetes|g__Triavirus|s__Triavirus tp3102	Triavirus tp3102	0	80	0	5	754	0	0	0	0	4	0	8	0	0	0	0	4	0	0	0	0	0	0	0	0	0	0	0	0	0	0	0	0	0	0	0	0	0	0	0	0	0	0	0	0	0	0	0
d__Viruses|k__Bamfordvirae|p__Preplasmiviricota|c__Tectiliviricetes|o__Rowavirales|f__Adenoviridae|g__Mastadenovirus|s__Simian mastadenovirus C	Simian mastadenovirus C	0	0	0	0	0	0	0	0	0	0	0	0	0	0	0	0	0	0	68	0	0	0	1	0	0	0	0	0	0	0	0	0	0	0	0	0	0	776	0	0	0	0	0	0	0	0	0	0
d__Viruses|k__Heunggongvirae|p__Uroviricota|c__Caudoviricetes|g__Attisvirus|s__Gordonia phage Pickett	Gordonia phage Pickett	0	0	12	0	0	0	0	187	82	9	169	0	0	0	19	4	0	5	0	46	0	0	2	0	204	0	13	4	22	1	0	0	0	3	0	0	0	0	0	22	10	0	0	0	0	0	0	0
d__Viruses|k__Heunggongvirae|p__Uroviricota|c__Caudoviricetes|g__Omarvirus|s__Omarvirus omar	Omarvirus omar	612	16	0	1	16	0	0	2	0	33	2	5	3	5	2	8	2	4	0	4	0	5	27	10	0	0	2	1	0	2	0	6	1	3	0	2	0	0	3	4	1	2	4	0	0	7	0	10
d__Viruses|k__Heunggongvirae|p__Uroviricota|c__Caudoviricetes|f__Vilmaviridae|g__Kumaovirus|s__Kumaovirus kumao	Kumaovirus kumao	0	2	11	1	0	1	1	0	3	4	2	0	6	11	2	0	0	1	115	2	0	0	18	62	6	0	0	2	2	0	59	54	16	52	15	22	98	4	46	1	1	2	2	55	11	58	0	9
d__Viruses|k__Heunggongvirae|p__Uroviricota|c__Caudoviricetes|g__Wellingtonvirus|s__Wellingtonvirus wellington	Wellingtonvirus wellington	86	30	10	10	31	3	17	18	7	0	13	14	1	7	3	8	4	8	17	6	4	1	12	20	12	2	126	3	13	5	14	8	9	4	7	24	14	26	5	16	5	9	7	1	4	11	1	22
d__Viruses|k__Heunggongvirae|p__Uroviricota|c__Caudoviricetes|g__Moineauvirus|s__Streptococcus phage 128	Streptococcus phage 128	5	27	1	2	571	1	3	12	3	9	3	13	2	1	32	1	0	53	0	0	0	1	1	0	0	3	0	2	4	0	0	0	0	0	2	0	0	0	1	37	3	0	1	0	0	0	0	0
d__Viruses|k__Heunggongvirae|p__Uroviricota|c__Caudoviricetes|f__Schitoviridae|s__Rhizobium phage RHph_I1_6	Rhizobium phage RHph_I1_6	43	54	19	0	10	0	17	47	38	5	27	30	2	9	46	16	48	23	5	55	6	62	18	5	1	1	8	4	13	10	3	1	25	13	3	1	5	3	4	63	7	2	0	0	2	17	1	0
d__Viruses|k__Heunggongvirae|p__Uroviricota|c__Caudoviricetes|o__Crassvirales|f__Crevaviridae|g__Kingevirus|s__Kingevirus communis	Kingevirus communis	430	6	17	0	13	3	0	0	4	60	0	82	4	4	8	14	4	5	1	4	19	0	0	3	0	0	6	1	3	0	0	1	2	0	9	0	3	0	2	3	13	2	1	0	1	0	28	4
d__Viruses|k__Heunggongvirae|p__Uroviricota|c__Caudoviricetes|s__Staphylococcus phage SPbeta-like	Staphylococcus phage SPbeta-like	7	300	0	10	237	0	3	45	0	21	1	21	9	1	1	5	24	46	0	4	2	5	0	0	3	0	0	9	0	1	1	0	2	0	6	0	0	1	0	0	2	0	0	0	0	0	0	0
d__Viruses|k__Heunggongvirae|p__Uroviricota|c__Caudoviricetes|g__Byrnievirus|s__Byrnievirus HK97	Byrnievirus HK97	41	0	6	0	17	1	7	0	0	0	11	84	0	22	43	3	76	84	0	144	4	115	3	0	3	0	4	1	5	6	2	2	37	0	2	2	4	0	2	0	1	10	0	0	0	14	2	0
d__Viruses|k__Heunggongvirae|p__Uroviricota|c__Caudoviricetes|s__Aeromonas phage LAh10	Aeromonas phage LAh10	34	25	44	6	20	0	12	25	13	25	22	38	1	9	32	9	36	27	3	64	10	71	26	2	4	0	13	2	13	16	1	4	19	1	2	2	6	39	1	47	4	1	1	0	2	14	1	3
d__Viruses|k__Bamfordvirae|p__Preplasmiviricota|c__Tectiliviricetes|o__Rowavirales|f__Adenoviridae|g__Mastadenovirus|s__Simian mastadenovirus B	Simian mastadenovirus B	0	0	0	0	0	0	0	0	0	0	0	0	0	0	0	0	0	0	45	0	0	0	0	0	0	0	0	0	0	0	0	0	0	0	0	1	0	712	0	0	0	0	0	0	0	0	0	0
d__Viruses|k__Heunggongvirae|p__Uroviricota|c__Caudoviricetes|s__Lactobacillus prophage Lj965	Lactobacillus prophage Lj965	0	0	0	0	7	0	0	29	4	15	0	32	0	0	0	0	0	168	0	0	50	0	0	0	1	0	0	0	0	0	0	0	1	0	0	0	0	0	0	0	372	0	0	0	0	0	0	0
d__Viruses|k__Heunggongvirae|p__Uroviricota|c__Caudoviricetes|g__Lambdavirus|s__Lambdavirus HK629	Lambdavirus HK629	22	0	3	0	0	0	375	1	0	0	0	58	0	0	0	0	0	0	0	95	0	0	1	0	0	0	0	0	1	17	0	1	1	2	1	0	1	0	0	88	0	0	0	0	0	7	0	0
d__Viruses|k__Heunggongvirae|p__Uroviricota|c__Caudoviricetes|g__Mieseafarmvirus|s__Mieseafarmvirus RSL1	Mieseafarmvirus RSL1	38	31	17	0	14	3	15	27	21	4	41	26	1	4	32	8	45	29	6	44	1	51	20	2	3	0	12	2	19	10	1	3	23	3	7	2	3	1	0	61	5	3	2	3	0	9	10	11
d__Viruses|k__Heunggongvirae|p__Uroviricota|c__Caudoviricetes|g__Lederbergvirus|s__Salmonella phage epsilon34	Salmonella phage epsilon34	17	0	2	0	0	1	226	17	0	0	2	32	0	0	6	0	27	125	0	54	4	0	0	0	6	0	22	0	9	0	0	0	79	0	5	3	0	0	0	0	1	6	0	0	0	18	2	2
d__Viruses|k__Heunggongvirae|p__Uroviricota|c__Caudoviricetes|s__Arthrobacter phage Persistence	Arthrobacter phage Persistence	0	9	1	0	177	25	7	35	36	25	1	0	0	12	1	182	0	0	0	32	0	0	2	0	0	9	0	47	3	0	2	0	4	0	38	0	0	0	8	5	2	0	0	0	1	1	0	0
d__Viruses|k__Heunggongvirae|p__Uroviricota|c__Caudoviricetes|g__Lambdavirus|s__Enterobacteria phage mEp237	Enterobacteria phage mEp237	31	0	18	0	19	5	16	31	36	19	48	25	4	18	122	4	33	24	0	40	7	59	11	0	2	0	14	0	29	2	1	2	18	6	0	0	0	0	1	0	2	4	0	0	1	8	0	1
d__Viruses|k__Heunggongvirae|p__Uroviricota|c__Caudoviricetes|f__Peduoviridae|g__Peduovirus|s__Peduovirus P24E6b	Peduovirus P24E6b	291	0	7	0	0	0	0	0	0	0	0	0	9	17	89	50	0	41	0	0	9	0	0	0	21	0	33	0	25	0	15	3	4	9	0	0	2	0	1	0	11	8	0	0	0	13	0	0
d__Viruses|k__Heunggongvirae|p__Uroviricota|c__Caudoviricetes|s__Streptococcus phage SpSL1	Streptococcus phage SpSL1	0	92	8	6	392	6	17	42	1	2	3	0	0	10	3	7	0	13	0	3	8	0	1	2	0	0	3	2	3	0	0	1	0	0	12	0	0	0	0	3	2	0	1	0	0	0	9	0
d__Viruses|k__Heunggongvirae|p__Uroviricota|c__Caudoviricetes|g__Shamshuipovirus|s__Shamshuipovirus HK022	Shamshuipovirus HK022	23	0	10	0	14	2	193	61	26	0	0	0	1	6	2	0	1	0	0	4	4	0	1	0	0	0	0	0	1	39	0	4	3	0	0	4	2	0	0	221	0	12	0	0	0	5	2	0
d__Viruses|k__Heunggongvirae|p__Uroviricota|c__Caudoviricetes|g__Peeveelvirus|s__Peeveelvirus SA780ruMSSAST101	Peeveelvirus SA780ruMSSAST101	0	59	0	5	565	0	0	0	0	1	0	16	0	0	0	0	0	0	0	0	0	0	0	0	0	0	0	0	0	0	0	0	0	0	0	0	0	0	0	0	0	0	0	0	0	0	0	0
d__Viruses|k__Heunggongvirae|p__Uroviricota|c__Caudoviricetes|f__Peduoviridae|g__Felsduovirus|s__Felsduovirus RE2010	Felsduovirus RE2010	19	0	7	3	0	0	0	0	0	0	13	0	0	32	129	0	0	21	0	1	3	0	0	0	0	0	15	12	0	52	6	0	0	1	7	0	19	0	0	288	1	0	0	0	0	2	0	0
d__Viruses|k__Heunggongvirae|p__Uroviricota|c__Caudoviricetes|g__Harrisonburgvirus|s__Pseudomonas phage PPpW-3	Pseudomonas phage PPpW-3	10	35	15	1	228	0	10	53	4	6	4	54	2	3	16	3	3	59	0	4	18	2	3	3	1	2	2	2	7	0	1	1	1	2	13	0	0	0	4	59	3	0	0	0	0	0	2	2
d__Viruses|k__Heunggongvirae|p__Uroviricota|c__Caudoviricetes|o__Crassvirales|f__Suoliviridae|g__Buchavirus|s__Buchavirus coli	Buchavirus coli	0	0	0	0	0	0	0	0	0	0	0	0	0	0	0	0	0	0	384	0	0	69	0	3	0	0	0	70	0	0	0	0	0	0	0	2	0	5	0	0	0	90	13	0	0	0	0	0
d__Viruses|k__Heunggongvirae|p__Uroviricota|c__Caudoviricetes|g__Lambdavirus|s__Enterobacteria phage phi80	Enterobacteria phage phi80	4	61	2	0	0	0	4	1	3	16	206	0	0	6	225	1	2	7	0	1	3	21	1	0	0	0	0	5	3	7	1	4	2	2	4	0	4	0	0	18	4	4	0	0	0	1	1	0
d__Viruses|k__Heunggongvirae|p__Uroviricota|c__Caudoviricetes|f__Peduoviridae|g__Peduovirus|s__Peduovirus L413C	Peduovirus L413C	48	0	11	0	0	0	0	0	0	0	0	0	0	0	107	31	22	3	0	0	6	0	6	0	1	0	1	153	18	0	6	6	1	8	0	1	55	0	1	107	19	2	0	0	0	8	0	2
d__Viruses|k__Heunggongvirae|p__Uroviricota|c__Caudoviricetes|g__Jerseyvirus|s__Salmonella phage JD01	Salmonella phage JD01	45	0	22	2	18	4	23	33	31	0	0	43	6	4	25	5	42	32	0	61	12	58	23	0	3	0	9	4	10	3	0	0	28	1	1	0	0	0	0	16	8	3	0	0	1	10	1	1
d__Viruses|k__Heunggongvirae|p__Uroviricota|c__Caudoviricetes|f__Peduoviridae|g__Peduovirus|s__Peduovirus YPM46	Peduovirus YPM46	112	0	1	0	0	0	0	0	0	0	0	0	2	20	67	23	3	3	0	0	4	0	1	0	4	0	1	0	14	0	10	24	0	132	0	0	0	1	1	0	8	0	0	0	0	139	2	0
d__Viruses|k__Heunggongvirae|p__Uroviricota|c__Caudoviricetes|g__Saikungvirus|s__Saikungvirus HK633	Saikungvirus HK633	37	0	0	0	0	0	71	7	0	0	7	15	0	0	0	0	159	99	0	45	3	49	2	0	6	0	6	0	0	0	0	0	56	0	0	1	3	0	0	1	0	5	0	0	0	9	0	7
d__Viruses|k__Heunggongvirae|p__Uroviricota|c__Caudoviricetes|o__Crassvirales|f__Suoliviridae|g__Aurodevirus|s__Aurodevirus hominis	Aurodevirus hominis	0	0	0	1	0	0	0	0	9	1	0	0	0	0	0	0	0	0	31	0	0	0	1	0	0	0	0	0	0	0	0	0	147	1	0	6	0	92	0	0	0	247	44	0	0	0	2	0
d__Viruses|k__Heunggongvirae|p__Uroviricota|c__Caudoviricetes|g__Seoulvirus|s__Seoulvirus SPN3US	Seoulvirus SPN3US	0	23	78	46	6	7	32	30	15	13	34	7	6	81	21	16	4	9	0	5	4	0	6	2	49	4	1	9	10	1	3	4	3	6	11	0	0	1	1	12	7	3	1	0	4	1	0	0
d__Viruses|k__Heunggongvirae|p__Uroviricota|c__Caudoviricetes|g__Lafunavirus|s__Lafunavirus LF1	Lafunavirus LF1	0	0	50	0	19	12	0	0	0	42	0	2	0	6	29	132	0	3	0	0	32	0	90	0	5	0	0	0	0	5	0	2	0	1	0	0	0	0	0	27	91	0	0	2	0	1	1	8
d__Viruses|k__Heunggongvirae|p__Uroviricota|c__Caudoviricetes|s__Rhodococcus phage E3	Rhodococcus phage E3	0	5	47	0	0	3	0	3	16	0	39	1	0	0	182	40	0	0	0	1	0	0	17	0	6	28	10	0	60	8	0	0	3	12	14	0	0	0	0	0	0	0	0	0	17	2	0	3
d__Viruses|k__Heunggongvirae|p__Uroviricota|c__Caudoviricetes|g__Oslovirus|s__Oslovirus VASD	Oslovirus VASD	0	0	23	0	0	2	11	46	40	0	0	17	27	8	22	0	1	5	0	34	6	0	6	0	2	0	0	2	18	3	0	6	2	26	7	0	0	0	0	194	7	2	0	0	0	17	0	0
d__Viruses|k__Heunggongvirae|p__Uroviricota|c__Caudoviricetes|f__Straboviridae|g__Lasallevirus|s__Acinetobacter virus Acj61	Acinetobacter virus Acj61	0	0	28	0	0	3	0	1	33	0	0	0	0	52	9	38	9	0	0	0	3	0	26	0	0	3	15	13	5	7	0	0	11	3	94	0	0	0	19	92	29	4	0	0	11	8	0	1
d__Viruses|k__Heunggongvirae|p__Uroviricota|c__Caudoviricetes|g__Deseoctovirus|s__Deseoctovirus DS8	Deseoctovirus DS8	4	0	22	2	19	1	10	19	34	0	0	33	0	0	28	13	42	30	0	46	10	55	13	0	2	0	15	0	9	13	0	1	20	7	1	2	9	0	2	57	4	0	0	0	0	12	1	0
d__Viruses|k__Heunggongvirae|p__Uroviricota|c__Caudoviricetes|g__Myrnavirus|s__Myranavirus phabba	Myranavirus phabba	1	10	20	5	0	11	14	43	24	18	25	38	3	0	10	43	15	18	0	12	32	0	7	0	17	26	1	26	30	5	1	10	6	8	22	0	0	5	4	4	3	1	6	0	3	1	0	0
d__Viruses|k__Heunggongvirae|p__Uroviricota|c__Caudoviricetes|g__Oslovirus|s__Oslovirus Lyz12581Vzw	Oslovirus Lyz12581Vzw	14	0	12	0	11	0	44	52	47	0	0	13	8	6	18	1	48	0	0	19	18	14	2	0	1	0	6	0	48	13	0	10	1	6	39	0	2	0	0	59	1	4	0	0	0	8	2	0
d__Viruses|k__Heunggongvirae|p__Uroviricota|c__Caudoviricetes|g__Nochtlivirus|s__Nochtlivirus mEp235	Nochtlivirus mEp235	53	15	1	0	22	0	3	0	0	0	1	25	1	11	3	0	0	30	0	47	0	65	0	0	2	0	0	0	7	27	0	7	18	0	1	0	1	0	0	182	0	1	0	0	0	0	0	0
d__Viruses|k__Heunggongvirae|p__Uroviricota|c__Caudoviricetes|f__Peduoviridae|g__Peduovirus|s__Peduovirus pro483	Peduovirus pro483	109	0	0	0	0	3	0	0	0	0	0	0	6	116	43	26	0	2	0	3	13	0	1	0	1	0	2	0	51	0	37	5	0	20	0	0	32	0	0	0	6	5	0	0	0	31	3	0
d__Viruses|k__Heunggongvirae|p__Uroviricota|c__Caudoviricetes|f__Demerecviridae|g__Priunavirus|s__Priunavirus PSTCR5	Priunavirus PSTCR5	0	1	57	2	11	0	1	9	15	2	38	0	1	0	140	51	1	0	1	1	3	0	12	0	0	25	7	2	49	2	5	0	1	3	26	0	0	1	5	2	0	1	1	0	9	2	0	2
d__Viruses|k__Heunggongvirae|p__Uroviricota|c__Caudoviricetes|g__Uetakevirus|s__Enterobacter phage Tyrion	Enterobacter phage Tyrion	109	249	0	0	0	1	56	10	0	10	11	0	24	0	0	27	0	0	0	0	2	5	0	0	0	0	1	0	2	0	0	0	1	0	1	0	0	1	0	0	0	1	1	0	0	1	0	0
d__Viruses|k__Bamfordvirae|p__Preplasmiviricota|c__Tectiliviricetes|o__Rowavirales|f__Adenoviridae|g__Mastadenovirus|s__Human mastadenovirus G	Human mastadenovirus G	0	0	0	0	0	0	0	0	0	0	0	0	0	1	0	0	0	0	28	0	0	0	1	0	0	0	0	0	0	0	0	0	0	0	0	0	0	456	0	0	0	0	0	0	0	0	0	0
d__Viruses|k__Heunggongvirae|p__Uroviricota|c__Caudoviricetes|s__Salmonella phage SPN3UB	Salmonella phage SPN3UB	25	0	0	0	0	0	163	33	21	0	78	19	5	0	15	8	21	6	0	34	6	8	0	0	3	0	6	1	1	2	0	1	0	0	0	0	1	0	0	14	0	1	0	0	0	0	1	2
d__Viruses|k__Heunggongvirae|p__Uroviricota|c__Caudoviricetes|f__Peduoviridae|g__Peduovirus|s__Escherichia phage P2_AC1	Escherichia phage P2_AC1	133	0	1	0	0	0	0	0	0	0	0	0	2	13	125	56	0	2	0	0	2	0	0	0	5	0	0	0	13	0	6	11	0	30	0	0	5	0	1	0	7	6	0	0	0	47	0	0
d__Viruses|k__Heunggongvirae|p__Uroviricota|c__Caudoviricetes|o__Crassvirales|f__Steigviridae|g__Kehishuvirus|s__Kehishuvirus primarius	Kehishuvirus primarius	0	2	0	0	0	0	0	0	0	0	0	0	0	0	0	0	2	0	0	0	0	0	0	120	0	0	0	1	0	0	0	0	0	0	0	0	0	0	0	0	3	0	0	297	9	34	0	1
d__Viruses|k__Heunggongvirae|p__Uroviricota|c__Caudoviricetes|g__Marfavirus|s__Marfavirus F48	Marfavirus F48	33	11	18	0	17	2	1	1	0	27	0	66	1	6	3	5	4	6	8	6	10	0	3	13	0	7	41	3	15	2	11	11	4	8	10	1	2	9	0	9	21	6	12	0	5	2	16	14
d__Viruses|k__Bamfordvirae|p__Preplasmiviricota|c__Tectiliviricetes|o__Rowavirales|f__Adenoviridae|g__Mastadenovirus|s__Simian mastadenovirus I	Simian mastadenovirus I	0	0	0	0	0	0	0	0	0	0	0	0	0	0	0	0	0	0	40	0	0	0	1	0	0	0	0	0	0	0	0	0	0	0	0	0	0	425	0	0	0	0	0	0	0	0	0	0
d__Viruses|k__Heunggongvirae|p__Uroviricota|c__Caudoviricetes|g__Camtrevirus|s__Camtrevirus S3501	Camtrevirus S3501	0	0	36	0	0	3	0	0	0	0	7	0	0	0	0	0	2	0	5	0	0	2	23	15	0	1	11	2	65	1	5	7	0	9	3	2	0	15	0	18	112	40	5	0	8	15	1	1
d__Viruses|k__Heunggongvirae|p__Uroviricota|c__Caudoviricetes|o__Crassvirales|f__Suoliviridae|g__Aurodevirus|s__Aurodevirus intestinalis	Aurodevirus intestinalis	0	0	0	0	0	0	0	0	0	0	0	0	0	0	0	0	0	0	94	0	0	0	0	0	0	210	0	26	0	0	0	1	24	0	0	1	0	2	0	0	0	80	13	1	0	8	0	0
d__Viruses|k__Heunggongvirae|p__Uroviricota|c__Caudoviricetes|f__Peduoviridae|g__Felsduovirus|s__Felsduovirus SEN8	Felsduovirus SEN8	12	0	9	0	0	0	1	0	0	0	98	0	0	33	88	0	0	8	0	3	13	0	2	0	0	0	3	6	4	18	1	0	1	1	1	0	2	0	0	127	0	0	0	0	0	0	0	0
d__Viruses|k__Heunggongvirae|p__Uroviricota|c__Caudoviricetes|f__Straboviridae|g__Tequatrovirus|s__Tequatrovirus T4	Tequatrovirus T4	32	0	15	0	12	1	10	22	13	0	0	24	4	0	25	14	23	18	0	40	7	50	20	0	1	0	6	1	5	9	2	1	19	3	3	0	0	0	0	47	3	3	0	0	0	15	4	1
d__Viruses|k__Heunggongvirae|p__Uroviricota|c__Caudoviricetes|f__Straboviridae|g__Pseudotevenvirus|s__Pseudotevenvirus gap161	Pseudotevenvirus gap161	0	0	0	0	0	0	0	0	0	0	0	0	0	0	1	0	0	0	0	0	0	0	1	0	0	0	0	0	0	0	0	0	0	0	0	0	0	449	0	0	0	0	0	0	0	0	0	0
d__Viruses|k__Heunggongvirae|p__Uroviricota|c__Caudoviricetes|o__Crassvirales|f__Steigviridae|g__Mahstovirus|s__Mahstovirus faecalis	Mahstovirus faecalis	0	0	0	0	0	0	0	0	0	0	0	0	0	0	0	0	0	0	0	0	1	0	0	1	0	0	0	0	0	1	0	0	245	1	1	0	0	0	0	0	0	0	0	184	0	5	0	8
d__Viruses|k__Heunggongvirae|p__Uroviricota|c__Caudoviricetes|g__Baikalvirus|s__Baikalvirus PaBG	Baikalvirus PaBG	0	0	9	0	0	2	2	0	2	0	2	1	1	1	1	0	2	1	1	0	0	180	6	2	6	112	1	1	0	1	21	0	1	23	0	1	18	1	0	0	0	1	2	2	18	1	0	20
d__Viruses|k__Bamfordvirae|p__Preplasmiviricota|c__Tectiliviricetes|o__Rowavirales|f__Adenoviridae|g__Mastadenovirus|s__Human mastadenovirus E	Human mastadenovirus E	0	0	0	0	0	0	0	0	0	0	0	0	0	0	2	0	0	1	28	1	0	0	0	0	0	0	0	0	0	0	0	0	0	0	0	4	0	391	0	0	0	0	0	9	0	0	0	0
d__Viruses|k__Heunggongvirae|p__Uroviricota|c__Caudoviricetes|g__Schubertvirus|s__Schubertvirus schubert	Schubertvirus schubert	4	1	1	0	0	2	9	203	0	4	148	2	6	0	0	10	0	1	0	0	0	0	0	0	0	7	5	1	1	0	0	0	1	1	0	0	0	1	0	7	0	0	4	0	0	10	0	0
d__Viruses|k__Heunggongvirae|p__Uroviricota|c__Caudoviricetes|g__Diegovirus|s__Diegovirus POCJ13	Diegovirus POCJ13	0	0	3	0	0	0	1	1	8	8	0	0	4	18	0	0	0	22	0	0	17	1	1	0	2	0	0	1	101	8	0	9	13	3	137	0	0	0	0	58	0	3	0	0	0	2	0	0
d__Viruses|k__Heunggongvirae|p__Uroviricota|c__Caudoviricetes|f__Peduoviridae|g__Peduovirus|s__Peduovirus P24C9	Peduovirus P24C9	180	0	0	4	0	0	0	0	0	0	0	0	1	0	120	15	0	2	0	0	4	0	0	0	1	0	1	0	8	0	17	3	1	23	0	0	0	0	0	2	12	4	0	0	0	13	0	0
d__Viruses|k__Heunggongvirae|p__Uroviricota|c__Caudoviricetes|f__Drexlerviridae|g__Webervirus|s__Webervirus KpNIH2	Webervirus KpNIH2	0	0	0	0	0	0	0	0	0	0	144	0	0	0	3	0	0	0	0	0	1	4	0	0	0	0	0	0	14	0	0	0	0	0	0	0	0	0	0	0	0	254	0	0	0	0	0	0
d__Viruses|k__Heunggongvirae|p__Uroviricota|c__Caudoviricetes|f__Kyanoviridae|g__Anaposvirus|s__Anaposvirus socalone	Anaposvirus socalone	0	0	2	0	0	2	0	0	1	0	0	0	0	0	0	0	0	0	2	0	2	0	8	22	0	15	0	11	0	2	13	3	3	32	0	3	48	1	13	0	0	35	87	8	5	24	1	69
d__Viruses|k__Heunggongvirae|p__Uroviricota|c__Caudoviricetes|f__Drexlerviridae|g__Webervirus|s__Webervirus shelby	Webervirus shelby	0	0	0	0	0	0	0	0	0	0	0	0	0	0	0	0	0	0	0	0	0	0	0	0	0	0	0	0	0	0	0	0	0	0	0	0	0	0	0	0	0	414	0	0	0	0	0	0
d__Viruses|k__Heunggongvirae|p__Uroviricota|c__Caudoviricetes|g__Moineauvirus|s__Streptococcus phage CHPC1041	Streptococcus phage CHPC1041	0	0	4	0	0	0	0	0	0	0	0	287	0	0	5	0	4	92	1	4	0	0	0	1	0	0	0	0	9	0	0	0	0	1	4	0	1	0	0	0	0	0	0	0	0	0	0	0
d__Viruses|k__Heunggongvirae|p__Uroviricota|c__Caudoviricetes|f__Straboviridae|g__Roskildevirus|s__Roskildevirus cronus	Roskildevirus cronus	0	0	2	0	0	0	0	0	0	0	0	1	0	0	0	2	1	1	5	0	1	0	9	14	0	7	12	11	58	1	19	3	0	5	1	20	6	25	2	15	126	3	5	0	10	12	0	10
d__Viruses|k__Heunggongvirae|p__Uroviricota|c__Caudoviricetes|f__Peduoviridae|g__Seongnamvirus|s__Seongnamvirus ESSI2	Seongnamvirus ESSI2	0	233	0	0	0	0	0	0	1	0	0	0	0	4	1	0	154	0	0	0	2	0	0	0	0	0	0	0	0	0	0	0	7	0	0	0	0	0	0	0	0	0	0	0	0	0	0	4
d__Viruses|k__Heunggongvirae|p__Uroviricota|c__Caudoviricetes|g__Kwaitsingvirus|s__Kwaitsingvirus HK446	Kwaitsingvirus HK446	39	0	1	0	52	0	34	3	1	0	0	58	1	6	14	2	2	18	0	120	0	0	4	0	2	0	0	0	11	0	0	1	17	0	0	1	3	0	0	0	3	7	0	0	0	2	3	0
d__Viruses|k__Heunggongvirae|p__Uroviricota|c__Caudoviricetes|s__Clostridium phage phiCD211	Clostridium phage phiCD211	237	0	1	0	0	2	0	1	0	0	0	0	0	0	0	0	0	0	0	8	0	1	0	0	1	0	1	0	0	0	0	0	0	0	0	1	0	0	0	0	0	1	1	0	0	0	107	1
d__Viruses|k__Heunggongvirae|p__Uroviricota|c__Caudoviricetes|f__Peduoviridae|g__Peduovirus|s__Yersinia phage P37	Yersinia phage P37	46	0	0	0	0	0	0	0	0	0	1	0	0	22	117	33	2	0	0	0	9	0	0	0	2	0	1	1	23	0	1	25	0	33	0	0	18	0	0	0	23	1	0	0	0	26	0	0
d__Viruses|k__Heunggongvirae|p__Uroviricota|c__Caudoviricetes|o__Crassvirales|f__Suoliviridae|g__Canhaevirus|s__Canhaevirus faecalis	Canhaevirus faecalis	0	0	1	0	0	0	0	0	0	0	0	0	0	0	0	0	0	0	0	0	0	0	0	0	0	87	0	0	0	0	0	0	89	0	0	0	0	76	0	0	0	121	22	1	0	0	0	0
d__Viruses|k__Heunggongvirae|p__Uroviricota|c__Caudoviricetes|g__Erskinevirus|s__Erskinevirus asesino	Erskinevirus asesino	3	23	53	0	0	6	0	0	3	6	25	1	0	46	1	6	0	4	5	15	3	8	2	6	2	0	4	0	3	33	11	0	38	3	2	3	1	6	3	12	4	26	2	0	4	0	2	11
d__Viruses|k__Heunggongvirae|p__Uroviricota|c__Caudoviricetes|g__Wongtaivirus|s__Wongtaivirus HK542	Wongtaivirus HK542	20	0	0	0	24	0	108	2	0	0	0	19	5	0	2	1	18	0	0	47	2	34	0	0	5	0	0	0	12	6	0	1	3	0	23	0	1	0	1	45	0	5	0	0	0	3	0	0
d__Viruses|k__Heunggongvirae|p__Uroviricota|c__Caudoviricetes|g__Lambdavirus|s__Enterobacteria phage HK225	Enterobacteria phage HK225	15	0	11	0	0	1	0	12	16	0	93	1	0	0	137	0	1	1	0	2	18	2	10	0	0	0	7	0	31	0	1	5	2	0	0	0	0	0	0	0	4	4	0	0	0	0	1	0
d__Viruses|k__Heunggongvirae|p__Uroviricota|c__Caudoviricetes|g__Armstrongvirus|s__Armstrongvirus armstrong	Armstrongvirus armstrong	0	0	1	0	0	4	14	283	0	5	0	3	10	0	0	1	1	6	0	3	0	0	0	0	0	12	4	0	0	0	0	0	0	2	3	0	0	0	0	9	8	0	5	0	1	13	0	0
d__Viruses|k__Heunggongvirae|p__Uroviricota|c__Caudoviricetes|f__Drexlerviridae|g__Webervirus|s__Webervirus PKP126	Webervirus PKP126	3	0	0	0	0	0	0	0	0	0	307	0	0	0	0	0	0	0	0	0	0	0	0	0	0	0	0	0	0	0	0	0	0	0	0	0	0	0	0	0	0	80	0	0	0	0	0	0
d__Viruses|k__Heunggongvirae|p__Uroviricota|c__Caudoviricetes|g__Muvirus|s__Escherichia phage D108	Escherichia phage D108	0	0	0	0	0	0	0	0	0	0	0	0	0	0	11	0	0	0	0	0	25	0	0	0	185	0	0	0	114	0	9	3	0	0	1	4	0	1	6	0	0	0	0	0	0	5	23	0
d__Viruses|k__Heunggongvirae|p__Uroviricota|c__Caudoviricetes|g__Jerseyvirus|s__Salmonella phage NBSal006	Salmonella phage NBSal006	0	0	0	0	0	0	0	0	0	0	0	0	0	0	3	0	0	0	0	0	0	331	0	0	0	0	44	0	0	0	2	0	2	0	3	0	0	0	0	0	0	0	0	0	0	0	0	0
d__Viruses|k__Heunggongvirae|p__Uroviricota|c__Caudoviricetes|f__Peduoviridae|g__Peduovirus|s__Peduovirus YPM50	Peduovirus YPM50	204	0	0	2	0	0	0	0	0	0	0	0	0	46	32	22	2	5	0	0	0	0	0	0	4	0	0	0	7	0	6	1	0	5	0	0	19	0	0	1	8	4	0	0	0	10	0	0
d__Viruses|k__Heunggongvirae|p__Uroviricota|c__Caudoviricetes|g__Poindextervirus|s__Poindextervirus rogue	Poindextervirus rogue	7	6	17	2	30	6	3	16	16	10	1	17	0	14	13	11	5	5	4	8	3	0	16	9	6	2	9	3	3	3	1	6	8	9	18	2	4	10	4	37	4	5	3	2	2	3	3	6
d__Viruses|k__Heunggongvirae|p__Uroviricota|c__Caudoviricetes|s__Salmonella phage vB_SosS_Oslo	Salmonella phage vB_SosS_Oslo	10	21	1	0	1	0	20	1	1	0	35	34	1	0	66	2	74	0	0	75	0	2	0	0	1	0	0	0	0	0	0	8	5	0	0	0	1	0	0	0	0	0	0	0	0	1	5	2
d__Viruses|k__Heunggongvirae|p__Uroviricota|c__Caudoviricetes|g__Yongloolinvirus|s__Yongloolinvirus CDMH1	Yongloolinvirus CDMH1	20	0	0	0	0	0	0	0	0	0	0	0	0	0	0	0	0	0	0	38	0	7	0	0	0	0	0	0	0	0	0	1	0	0	0	0	0	0	0	0	0	0	0	0	0	0	176	0
d__Viruses|k__Heunggongvirae|p__Uroviricota|c__Caudoviricetes|f__Straboviridae|g__Ishigurovirus|s__Ishigurovirus osborne	Ishigurovirus osborne	0	0	24	8	9	0	11	0	4	0	1	2	3	1	6	0	3	1	7	5	3	105	8	5	2	13	8	1	0	3	16	2	5	41	1	0	9	4	2	3	0	1	0	1	1	5	3	27
d__Viruses|k__Heunggongvirae|p__Uroviricota|c__Caudoviricetes|s__Streptococcus phage 5093	Streptococcus phage 5093	0	15	29	3	10	9	39	6	0	1	0	13	2	25	18	4	3	60	1	9	3	0	2	0	8	1	1	1	4	6	0	0	3	2	6	0	0	0	0	14	1	0	3	0	1	0	22	2
d__Viruses|k__Heunggongvirae|p__Uroviricota|c__Caudoviricetes|g__Muvirus|s__Muvirus mu	Muvirus mu	0	0	1	0	0	0	0	0	0	0	0	0	0	0	87	3	20	0	0	0	18	0	10	0	67	0	0	3	30	0	2	12	0	0	0	1	0	0	0	77	1	0	0	0	0	3	7	0
d__Viruses|k__Heunggongvirae|p__Uroviricota|c__Caudoviricetes|o__Crassvirales|f__Steigviridae|g__Lahndsivirus|s__Lahndsivirus rarus	Lahndsivirus rarus	3	2	0	1	1	0	0	0	1	8	0	0	2	1	1	1	1	1	3	2	1	0	2	80	0	1	1	2	3	0	10	1	0	19	3	5	1	0	1	2	2	3	3	104	10	17	10	26
d__Viruses|k__Heunggongvirae|p__Uroviricota|c__Caudoviricetes|o__Crassvirales|f__Suoliviridae|g__Cacepaovirus|s__Cacepaovirus simiae	Cacepaovirus simiae	0	1	0	0	4	0	1	0	0	0	0	3	1	0	0	0	1	0	3	0	5	0	7	15	2	0	0	1	0	0	0	14	2	0	3	0	4	0	6	0	1	0	0	10	0	246	0	4
d__Viruses|k__Heunggongvirae|p__Uroviricota|c__Caudoviricetes|s__Salmonella phage ST64B	Salmonella phage ST64B	0	0	1	0	1	4	3	0	0	0	3	77	0	0	0	0	91	29	0	94	5	0	0	0	0	0	0	0	1	0	0	0	15	0	0	0	2	0	0	0	0	4	0	0	0	1	0	4
d__Viruses|k__Heunggongvirae|p__Uroviricota|c__Caudoviricetes|g__Likavirus|s__Likavirus nanodon	Likavirus nanodon	0	0	9	0	0	9	6	46	19	13	16	31	0	0	7	24	11	1	0	5	11	0	5	0	0	13	1	11	30	2	0	1	1	5	11	0	1	0	0	11	6	4	2	0	8	0	0	2
d__Viruses|k__Bamfordvirae|p__Preplasmiviricota|c__Tectiliviricetes|o__Rowavirales|f__Adenoviridae|g__Mastadenovirus|s__Simian mastadenovirus H	Simian mastadenovirus H	0	0	2	0	0	0	0	0	0	0	0	0	0	0	0	0	0	0	26	0	0	0	0	0	0	0	0	0	0	0	0	0	0	0	0	0	0	302	0	0	0	0	0	0	0	0	0	1
d__Viruses|k__Heunggongvirae|p__Uroviricota|c__Caudoviricetes|f__Peduoviridae|g__Eganvirus|s__Eganvirus EtG	Eganvirus EtG	0	0	0	0	0	0	0	0	0	0	26	0	0	0	1	294	0	0	0	0	0	2	0	0	0	0	0	1	0	0	0	0	0	0	0	0	0	0	0	0	0	5	0	0	0	0	0	0
d__Viruses|k__Bamfordvirae|p__Preplasmiviricota|c__Tectiliviricetes|o__Rowavirales|f__Adenoviridae|g__Aviadenovirus|s__Fowl aviadenovirus B	Fowl aviadenovirus B	0	0	0	0	0	0	0	0	0	0	0	0	0	0	0	0	0	0	20	0	0	0	0	0	0	0	0	0	0	0	0	0	0	0	0	0	0	308	0	0	0	0	0	0	0	0	0	0
d__Viruses|k__Heunggongvirae|p__Uroviricota|c__Caudoviricetes|s__Streptococcus phage phiARI0462	Streptococcus phage phiARI0462	4	54	2	7	180	0	21	19	3	1	1	0	1	1	1	1	0	18	0	1	0	0	0	0	0	0	0	0	0	0	0	0	1	0	8	0	0	0	0	2	0	0	0	0	0	0	0	0
d__Viruses|k__Heunggongvirae|p__Uroviricota|c__Caudoviricetes|g__Lederbergvirus|s__Enterobacteria phage ST104	Enterobacteria phage ST104	0	0	1	0	0	0	138	7	0	0	0	67	0	0	0	11	1	0	0	89	0	0	0	0	0	0	0	0	2	0	0	0	1	0	2	0	0	1	0	1	0	4	0	0	0	0	0	0
d__Viruses|k__Heunggongvirae|p__Uroviricota|c__Caudoviricetes|g__Polybotosvirus|s__Polybotosvirus Atuph07	Polybotosvirus Atuph07	2	0	4	1	5	3	3	3	2	7	10	0	0	2	12	10	1	12	11	4	4	0	6	13	13	27	4	9	14	5	8	4	14	5	8	6	1	21	2	4	1	2	0	1	14	2	8	9
d__Viruses|k__Heunggongvirae|p__Uroviricota|c__Caudoviricetes|f__Demerecviridae|g__Vipunavirus|s__Vipunavirus pVp1	Vipunavirus pVp1	23	0	5	0	12	3	12	20	6	0	0	14	0	2	25	7	18	23	0	25	5	28	5	0	0	0	4	2	5	8	1	1	12	4	1	0	2	0	0	32	4	1	0	0	0	4	0	4
d__Viruses|k__Heunggongvirae|p__Uroviricota|c__Caudoviricetes|f__Peduoviridae|g__Peduovirus|s__Peduovirus pv12474III	Peduovirus pv12474III	78	0	3	0	0	0	0	0	0	0	1	0	0	7	103	20	0	3	0	0	2	0	0	0	0	0	1	15	12	0	4	6	0	14	0	0	5	0	0	0	20	1	0	0	0	18	0	0
d__Viruses|k__Heunggongvirae|p__Uroviricota|c__Caudoviricetes|g__Wongtaivirus|s__Wongtaivirus ECP1	Wongtaivirus ECP1	1	0	1	0	0	0	144	6	0	0	6	0	0	3	0	1	2	1	0	0	0	2	0	0	6	0	0	0	0	19	0	2	2	0	0	1	7	0	0	98	0	3	0	0	0	7	0	0
d__Viruses|k__Heunggongvirae|p__Uroviricota|c__Caudoviricetes|g__Phietavirus|s__Phietavirus pv3MRA	Phietavirus pv3MRA	0	29	0	1	281	0	0	0	0	0	0	0	0	0	0	0	0	0	0	0	0	0	0	0	0	0	0	0	0	0	0	0	0	0	0	0	0	0	0	0	0	0	0	0	0	0	0	0
d__Viruses|k__Heunggongvirae|p__Uroviricota|c__Caudoviricetes|f__Mesyanzhinovviridae|s__Janthinobacterium phage vB_JliM-Donnerlittchen	Janthinobacterium phage vB_JliM-Donnerlittchen	8	14	1	3	7	2	1	9	2	8	0	18	0	1	2	6	0	3	9	6	0	0	12	11	0	6	0	0	1	4	5	11	4	14	2	2	12	35	8	5	1	1	0	2	16	18	0	15
d__Viruses|k__Heunggongvirae|p__Uroviricota|c__Caudoviricetes|f__Kyanoviridae|g__Shandvirus|s__Shandvirus sh35	Shandvirus sh35	0	0	1	0	0	0	0	0	0	1	0	0	0	3	2	0	1	0	5	6	0	0	4	40	0	15	5	4	10	7	6	34	71	6	2	3	6	6	4	5	1	8	7	0	10	0	0	14
d__Viruses|k__Heunggongvirae|p__Uroviricota|c__Caudoviricetes|s__Clostridium phage vB_CpeS-CP51	Clostridium phage vB_CpeS-CP51	4	224	0	0	0	0	0	0	0	29	0	1	3	0	15	0	0	18	0	0	0	0	2	0	0	0	0	0	0	0	0	0	0	0	0	0	0	0	0	0	0	1	0	0	0	0	0	2
d__Viruses|k__Sangervirae|p__Phixviricota|c__Malgrandaviricetes|o__Petitvirales|f__Microviridae|s__Parabacteroides phage YZ-2015b	Parabacteroides phage YZ-2015b	0	0	96	0	0	0	0	0	0	0	0	0	0	0	0	0	0	0	0	0	0	0	113	85	0	0	0	0	0	0	0	0	0	0	0	0	0	0	0	0	0	0	0	0	0	0	0	1
d__Viruses|k__Heunggongvirae|p__Uroviricota|c__Caudoviricetes|g__Shamshuipovirus|s__Shamshuipovirus mEpX2	Shamshuipovirus mEpX2	4	0	0	0	5	0	137	6	1	0	0	27	0	0	0	0	13	0	0	47	0	27	0	0	0	0	0	0	0	0	0	1	8	0	1	1	0	0	0	1	0	2	0	0	0	4	0	2
d__Viruses|k__Heunggongvirae|p__Uroviricota|c__Caudoviricetes|g__Bantamvirus|s__Gordonia phage Mollymur	Gordonia phage Mollymur	0	0	12	0	0	3	24	49	0	16	0	19	0	1	0	26	8	7	0	13	22	0	8	0	0	16	1	12	0	4	0	3	5	15	8	0	0	1	2	0	0	2	0	1	1	2	0	0
d__Viruses|k__Heunggongvirae|p__Uroviricota|c__Caudoviricetes|f__Drexlerviridae|g__Rtpvirus|s__Rtpvirus Rtp	Rtpvirus Rtp	7	0	8	0	4	2	2	5	4	0	0	22	1	4	16	6	29	9	0	23	3	35	3	0	0	0	3	4	8	9	0	2	4	5	0	1	1	0	1	36	1	4	0	0	0	16	2	1
d__Viruses|k__Heunggongvirae|p__Uroviricota|c__Caudoviricetes|o__Crassvirales|f__Intestiviridae|g__Endlipuvirus|s__Endlipuvirus intestinihominis	Endlipuvirus intestinihominis	0	0	0	0	0	0	0	0	0	0	0	1	0	0	0	0	0	0	1	0	0	0	2	1	0	12	0	0	0	1	10	0	0	10	1	10	47	0	0	0	0	28	125	0	0	3	0	20
d__Viruses|k__Heunggongvirae|p__Uroviricota|c__Caudoviricetes|f__Peduoviridae|g__Peduovirus|s__Peduovirus P24B2	Peduovirus P24B2	165	0	1	2	0	0	0	0	0	0	0	0	0	15	25	1	0	0	0	0	1	0	0	0	10	0	0	0	4	0	2	0	0	14	0	0	1	0	1	0	4	16	0	0	0	12	0	0
d__Viruses|k__Heunggongvirae|p__Uroviricota|c__Caudoviricetes|f__Straboviridae|g__Gualtarvirus|s__Gualtarvirus mp1	Gualtarvirus mp1	1	13	2	0	0	5	1	0	0	6	17	5	0	10	8	6	2	1	10	3	0	2	7	6	1	10	3	8	16	3	7	7	35	5	0	2	1	6	5	3	2	15	8	1	0	6	2	11
d__Viruses|k__Heunggongvirae|p__Uroviricota|c__Caudoviricetes|g__Sherbrookevirus|s__Sherbrookevirus CDHM13	Sherbrookevirus CDHM13	0	0	0	0	0	0	0	0	0	0	0	0	0	0	0	0	0	0	0	74	0	5	0	0	0	0	3	0	0	0	0	0	0	0	0	0	0	0	0	0	0	0	0	0	1	0	8	0
d__Viruses|k__Heunggongvirae|p__Uroviricota|c__Caudoviricetes|s__Hafnia phage yong1	Hafnia phage yong1	64	0	13	0	0	1	0	27	15	0	0	0	0	0	1	36	42	6	0	0	9	0	1	0	11	3	2	1	0	0	0	0	3	0	2	1	0	0	1	0	0	10	0	0	0	5	11	0
d__Viruses|k__Bamfordvirae|p__Nucleocytoviricota|c__Megaviricetes|o__Pimascovirales|f__Ascoviridae|g__Ascovirus|s__Trichoplusia ni ascovirus 2c	Trichoplusia ni ascovirus 2c	0	3	29	1	17	0	0	6	1	2	2	0	0	3	80	0	0	5	2	0	2	0	7	13	0	13	4	0	20	2	1	0	3	4	0	2	3	0	0	5	2	1	0	0	7	0	1	0
d__Viruses|k__Heunggongvirae|p__Uroviricota|c__Caudoviricetes|s__Pectobacterium phage ZF40	Pectobacterium phage ZF40	16	6	3	0	2	0	5	8	8	3	60	9	5	0	15	3	10	15	0	10	1	16	4	0	0	0	6	2	9	3	0	0	6	1	2	1	2	2	0	11	4	3	0	0	0	3	0	0
d__Viruses|k__Heunggongvirae|p__Uroviricota|c__Caudoviricetes|g__Larmunavirus|s__Larmunavirus Lrm1	Larmunavirus Lrm1	0	0	0	0	0	10	2	0	0	7	0	0	4	23	42	0	0	4	0	16	0	0	0	2	6	0	0	0	0	0	0	0	4	0	0	0	0	7	0	0	127	0	0	0	0	1	0	0
d__Viruses|k__Heunggongvirae|p__Uroviricota|c__Caudoviricetes|s__Enterococcus phage phiEf11	Enterococcus phage phiEf11	0	0	113	0	0	0	45	12	0	22	0	0	0	0	4	0	7	8	0	5	0	0	9	0	2	0	0	0	3	0	0	0	0	0	0	0	0	0	0	0	1	0	0	0	0	0	0	0
d__Viruses|k__Heunggongvirae|p__Uroviricota|c__Caudoviricetes|g__Lubbockvirus|s__Lubbockvirus CD119	Lubbockvirus CD119	86	0	0	0	0	0	0	0	0	0	0	0	0	0	0	0	0	0	0	17	0	0	0	0	0	0	0	0	0	0	0	0	0	1	0	0	0	0	0	1	0	0	0	0	0	0	53	0
d__Viruses|k__Heunggongvirae|p__Uroviricota|c__Caudoviricetes|f__Straboviridae|g__Mylasvirus|s__Mylasvirus persius	Mylasvirus persius	134	3	0	0	1	1	0	1	0	14	0	2	0	1	6	1	3	1	0	7	0	0	0	11	0	0	19	2	1	0	6	4	0	1	0	2	1	5	0	0	2	2	2	0	0	0	0	8
d__Viruses|k__Heunggongvirae|p__Uroviricota|c__Caudoviricetes|g__Lagaffevirus|s__Lagaffevirus lagaffe	Lagaffevirus lagaffe	0	0	0	0	0	0	0	0	0	0	0	1	0	0	0	0	0	0	35	0	0	0	0	0	0	0	0	0	0	0	1	144	0	0	0	0	58	0	0	0	0	0	0	4	0	0	0	2
d__Viruses|k__Heunggongvirae|p__Uroviricota|c__Caudoviricetes|f__Ackermannviridae|g__Vapseptimavirus|s__Vapseptimavirus VAP7	Vapseptimavirus VAP7	0	0	19	0	1	1	0	33	33	0	0	26	0	0	2	9	41	0	0	39	5	0	8	1	0	0	3	0	5	0	3	0	1	0	0	0	0	0	0	1	0	1	0	0	0	6	2	2
d__Viruses|k__Heunggongvirae|p__Uroviricota|c__Caudoviricetes|g__Ravinvirus|s__Ravinvirus N15	Ravinvirus N15	2	0	7	0	0	0	0	10	8	0	0	0	0	0	4	0	0	0	0	0	38	1	16	0	0	0	0	0	89	0	5	36	0	0	0	0	0	0	0	0	0	0	0	0	0	0	0	0
d__Viruses|k__Heunggongvirae|p__Uroviricota|c__Caudoviricetes|g__Uetakevirus|s__Uetakevirus epsilon15	Uetakevirus epsilon15	2	108	1	0	0	0	65	4	2	44	4	0	1	0	0	3	0	0	0	0	0	2	0	0	0	0	1	0	0	0	0	0	0	0	1	0	0	0	0	0	0	2	0	0	0	0	0	0
d__Viruses|k__Heunggongvirae|p__Uroviricota|c__Caudoviricetes|s__Enterobacterial phage mEp390	Enterobacterial phage mEp390	10	23	3	0	0	0	0	0	0	0	91	0	3	0	20	6	0	0	0	0	15	5	0	0	0	0	0	0	23	0	1	5	0	0	1	0	0	0	0	1	0	6	1	0	0	0	0	0
d__Viruses|k__Heunggongvirae|p__Uroviricota|c__Caudoviricetes|f__Chaseviridae|g__Sabourvirus|s__Sabourvirus sv4HA13	Sabourvirus sv4HA13	20	0	26	1	13	0	19	27	24	0	0	0	3	1	12	3	36	3	0	0	5	0	15	1	0	0	0	1	3	7	0	0	2	0	2	0	0	0	0	0	4	2	0	0	0	2	0	2
d__Viruses|k__Heunggongvirae|p__Uroviricota|c__Caudoviricetes|f__Peduoviridae|g__Peduovirus|s__Peduovirus YPM22	Peduovirus YPM22	80	0	2	0	0	0	0	0	0	0	0	0	2	31	41	6	0	0	0	0	7	0	0	0	1	0	0	0	13	0	1	14	0	10	0	0	4	0	0	0	2	1	0	0	0	10	0	0
d__Viruses|k__Heunggongvirae|p__Uroviricota|c__Caudoviricetes|g__Aguilavirus|s__Aguilavirus mEp213	Aguilavirus mEp213	3	0	0	0	0	0	0	0	0	0	3	39	0	0	0	14	58	0	0	57	1	2	1	0	2	0	0	0	0	1	0	0	3	0	0	3	1	0	2	17	0	3	0	0	0	20	0	2
d__Viruses|k__Heunggongvirae|p__Uroviricota|c__Caudoviricetes|g__Sarumanvirus|s__Sarumanvirus bcepsauron	Sarumanvirus bcepsauron	0	0	4	0	0	1	0	0	0	149	0	0	2	2	3	0	0	0	0	0	0	1	0	0	0	0	34	6	1	0	1	0	14	3	2	0	0	3	0	0	1	0	1	0	0	2	0	0
d__Viruses|k__Heunggongvirae|p__Uroviricota|c__Caudoviricetes|g__Muvirus|s__Muvirus SfMu	Muvirus SfMu	0	0	1	0	0	2	0	0	0	0	0	0	0	0	29	0	8	0	0	0	12	0	5	0	57	0	0	4	36	0	2	6	2	0	0	4	0	0	3	22	3	0	0	0	0	3	25	0
d__Viruses|k__Heunggongvirae|p__Uroviricota|c__Caudoviricetes|f__Kyanoviridae|g__Charybdisvirus|s__Charybdisvirus scam3	Charybdisvirus scam3	0	0	3	0	0	0	0	0	0	0	0	2	0	1	0	1	0	0	7	0	3	0	3	8	0	4	1	0	0	1	2	12	0	19	3	0	0	0	23	0	1	0	1	19	3	97	0	4
d__Viruses|k__Heunggongvirae|p__Uroviricota|c__Caudoviricetes|g__Petsuvirus|s__Kosakonia phage Kc263	Kosakonia phage Kc263	26	1	1	0	14	2	13	4	0	1	6	0	3	3	22	0	0	17	0	0	4	41	1	0	0	0	5	3	7	8	0	1	20	2	1	0	1	0	2	0	1	1	0	2	0	0	3	3
d__Viruses|k__Heunggongvirae|p__Uroviricota|c__Caudoviricetes|f__Salasmaviridae|g__Cepunavirus|s__Cepunavirus Cp1	Cepunavirus Cp1	0	0	0	0	0	46	0	15	0	8	127	0	0	7	0	7	0	0	0	0	0	0	0	1	0	0	0	0	0	0	0	0	0	0	2	0	0	0	4	0	0	0	0	0	0	0	0	0
d__Viruses|k__Heunggongvirae|p__Uroviricota|c__Caudoviricetes|f__Herelleviridae|g__Watanabevirus|s__Watanabevirus wv3521	Watanabevirus wv3521	1	0	2	1	2	7	10	1	1	10	7	17	0	0	15	20	2	11	1	1	5	2	13	4	0	4	0	0	0	0	3	4	0	7	1	5	0	8	1	1	19	0	1	2	0	6	1	5
d__Viruses|k__Bamfordvirae|p__Preplasmiviricota|c__Tectiliviricetes|o__Rowavirales|f__Adenoviridae|g__Mastadenovirus|s__Human mastadenovirus B	Human mastadenovirus B	0	0	1	0	0	0	0	1	0	0	0	0	0	0	0	0	0	0	12	0	0	0	0	0	0	0	0	0	0	0	0	0	0	0	0	0	0	188	0	0	0	0	0	2	0	0	0	0
d__Viruses|k__Heunggongvirae|p__Uroviricota|c__Caudoviricetes|f__Peduoviridae|g__Peduovirus|s__Peduovirus R18C	Peduovirus R18C	1	0	0	0	45	0	0	0	0	0	0	0	2	12	26	20	0	7	0	0	1	0	1	0	5	0	2	0	7	0	7	5	0	14	0	0	11	0	3	0	2	0	0	0	0	18	0	1
d__Viruses|k__Heunggongvirae|p__Uroviricota|c__Caudoviricetes|f__Straboviridae|g__Zedzedvirus|s__Zedzedvirus zz1	Zedzedvirus zz1	0	0	0	0	0	0	0	0	0	0	1	0	0	0	0	0	0	0	0	0	0	1	2	0	0	8	0	1	0	3	5	0	0	12	0	0	41	0	0	0	1	37	89	0	0	1	0	0
d__Viruses|k__Heunggongvirae|p__Uroviricota|c__Caudoviricetes|f__Peduoviridae|g__Peduovirus|s__Peduovirus Wphi	Peduovirus Wphi	103	0	0	0	0	0	0	0	0	0	0	0	1	8	31	19	0	11	0	0	1	0	0	0	0	0	2	0	8	0	1	3	0	4	0	0	3	0	0	0	0	0	0	0	0	2	0	0
d__Viruses|k__Heunggongvirae|p__Uroviricota|c__Caudoviricetes|g__Sukhumvitvirus|s__Sukhumvitvirus T25	Sukhumvitvirus T25	3	0	3	0	4	15	0	1	3	10	1	5	7	16	11	2	0	2	4	10	1	0	3	5	1	0	1	1	0	5	1	3	1	3	3	0	3	3	5	5	32	0	1	2	0	3	3	6
d__Viruses|k__Heunggongvirae|p__Uroviricota|c__Caudoviricetes|o__Crassvirales|f__Intestiviridae|g__Jahgtovirus|s__Jahgtovirus intestinalis	Jahgtovirus intestinalis	0	0	0	0	0	0	0	0	0	0	0	1	1	0	0	0	0	0	2	1	2	168	0	0	0	0	0	0	5	11	0	0	0	0	0	0	0	0	1	0	0	0	0	0	0	0	0	0
d__Viruses|k__Heunggongvirae|p__Uroviricota|c__Caudoviricetes|g__Yongloolinvirus|s__Yongloolinvirus MMP01	Yongloolinvirus MMP01	49	0	0	0	0	3	0	0	0	0	0	0	0	0	0	0	0	0	0	16	0	4	0	0	0	0	0	0	0	0	0	0	0	0	0	0	0	0	0	0	0	0	0	0	0	0	70	0
d__Viruses|k__Heunggongvirae|p__Uroviricota|c__Caudoviricetes|g__Lacusarxvirus|s__Lacusarxvirus lacusarx	Lacusarxvirus lacusarx	0	0	0	0	0	0	0	0	0	0	0	0	0	1	1	3	0	4	13	1	0	0	2	12	2	2	12	1	3	2	11	9	0	0	0	14	8	15	0	2	2	4	2	0	2	3	0	6
d__Viruses|k__Heunggongvirae|p__Uroviricota|c__Caudoviricetes|s__Clostridium phage phiCT9441A	Clostridium phage phiCT9441A	179	0	0	0	0	0	0	0	0	0	0	0	0	1	0	0	0	0	0	2	0	0	0	0	0	0	0	0	0	0	0	0	0	0	0	0	0	0	0	0	0	0	1	0	0	0	5	0
d__Viruses|k__Heunggongvirae|p__Uroviricota|c__Caudoviricetes|g__Bertelyvirus|s__Bertelyvirus BL9	Bertelyvirus BL9	1	8	9	2	6	1	1	4	1	3	2	4	1	2	5	0	3	0	3	6	3	2	5	3	1	0	0	0	2	7	5	23	16	2	10	4	2	3	7	4	1	3	1	3	4	6	0	6
d__Viruses|k__Heunggongvirae|p__Uroviricota|c__Caudoviricetes|g__Yongloolinvirus|s__Yongloolinvirus C2	Yongloolinvirus C2	3	0	0	0	0	4	0	0	0	0	0	0	0	0	0	0	0	0	0	9	0	6	0	0	0	0	0	0	0	0	0	0	0	0	0	0	0	0	0	0	0	0	0	0	0	0	121	0
d__Viruses|k__Heunggongvirae|p__Uroviricota|c__Caudoviricetes|g__Menderavirus|s__Menderavirus mendera	Menderavirus mendera	0	0	18	17	12	0	7	1	0	0	13	10	0	3	11	6	0	1	1	13	5	0	0	1	0	0	4	0	9	0	0	1	10	2	5	3	4	0	2	1	1	0	2	0	1	0	0	2
d__Viruses|k__Heunggongvirae|p__Uroviricota|c__Caudoviricetes|f__Peduoviridae|g__Eganvirus|s__Salmonella phage BIS20	Salmonella phage BIS20	3	11	1	0	0	0	0	0	0	0	2	1	0	0	5	134	0	2	0	1	0	3	0	0	0	0	0	0	3	0	0	1	0	0	0	0	0	0	0	0	0	5	0	0	0	0	0	0
d__Viruses|k__Heunggongvirae|p__Uroviricota|c__Caudoviricetes|s__Klebsiella phage VLCpiS11a	Klebsiella phage VLCpiS11a	2	0	0	0	0	0	0	0	0	159	0	0	2	0	0	0	0	4	0	0	0	3	0	0	0	0	0	0	0	0	0	0	0	0	0	0	0	0	0	0	0	0	0	0	0	0	0	0
d__Viruses|k__Heunggongvirae|p__Uroviricota|c__Caudoviricetes|f__Schitoviridae|s__Alcaligenes phage vB_AfaP_QDWS595	Alcaligenes phage vB_AfaP_QDWS595	0	0	0	0	0	0	0	0	0	0	0	0	0	0	0	0	1	0	0	0	0	0	1	0	0	5	2	1	0	4	0	0	0	6	0	0	35	0	0	0	0	27	83	0	0	0	0	5
d__Viruses|k__Heunggongvirae|p__Uroviricota|c__Caudoviricetes|f__Peduoviridae|g__Peduovirus|s__Yersinia phage HQ103	Yersinia phage HQ103	3	0	0	0	0	0	0	0	0	0	0	0	0	6	76	6	0	3	0	0	5	0	0	0	2	0	4	0	13	0	5	3	0	6	0	0	10	0	1	0	14	1	0	0	0	5	0	0
d__Viruses|k__Heunggongvirae|p__Uroviricota|c__Caudoviricetes|s__Klebsiella phage VLCpiS13b	Klebsiella phage VLCpiS13b	0	90	0	0	0	0	0	0	0	43	9	0	0	0	0	0	0	0	0	0	0	17	0	0	0	0	0	0	0	0	0	1	0	0	0	0	0	1	0	0	0	2	2	0	0	0	0	0
d__Viruses|k__Heunggongvirae|p__Uroviricota|c__Caudoviricetes|f__Herelleviridae|g__Tsarbombavirus|s__Tsarbombavirus BCP78	Tsarbombavirus BCP78	89	0	1	0	0	1	0	0	0	1	0	0	0	11	0	2	2	0	0	0	1	0	4	4	0	1	10	0	1	1	2	1	0	1	0	0	1	6	0	3	0	6	1	0	1	0	6	1
d__Viruses|k__Heunggongvirae|p__Uroviricota|c__Caudoviricetes|f__Peduoviridae|g__Eganvirus|s__Eganvirus ev186	Eganvirus ev186	0	0	1	0	0	0	0	0	0	0	1	0	0	0	1	147	0	1	0	0	0	0	0	0	0	0	3	0	0	0	0	0	1	0	0	0	0	0	1	0	0	1	0	0	0	0	0	0
d__Viruses|k__Heunggongvirae|p__Uroviricota|c__Caudoviricetes|o__Crassvirales|f__Intestiviridae|g__Delmidovirus|s__Delmidovirus splanchnicus	Delmidovirus splanchnicus	1	0	0	0	0	0	0	0	0	0	0	3	0	0	0	0	0	0	2	0	0	0	0	0	0	0	0	0	0	0	0	0	124	12	0	8	3	0	0	0	0	0	0	0	0	0	0	1
d__Viruses|k__Heunggongvirae|p__Uroviricota|c__Caudoviricetes|s__Clostridium phage phiCD6356	Clostridium phage phiCD6356	6	0	0	0	0	0	0	0	0	0	0	0	0	0	0	0	0	0	0	4	0	4	0	0	0	0	0	0	0	0	0	0	0	0	0	0	0	0	0	0	0	0	0	0	0	0	70	2
d__Viruses|k__Heunggongvirae|p__Uroviricota|c__Caudoviricetes|g__Uetakevirus|s__Uetakevirus SPN1S	Uetakevirus SPN1S	22	69	3	0	0	0	5	0	0	0	0	0	0	0	0	0	2	0	0	0	1	0	0	4	0	1	0	0	5	1	0	0	4	3	5	1	0	0	5	1	0	0	2	0	4	1	0	6
d__Viruses|k__Heunggongvirae|p__Uroviricota|c__Caudoviricetes|g__Saikungvirus|s__Saikungvirus HK75	Saikungvirus HK75	2	0	0	0	0	0	46	1	0	0	0	21	0	6	0	0	0	0	0	44	0	1	0	0	0	0	0	0	1	0	0	5	1	0	0	1	0	0	0	0	0	5	0	0	0	5	0	0
d__Viruses|k__Heunggongvirae|p__Uroviricota|c__Caudoviricetes|g__Wanchaivirus|s__Wanchaivirus mEp234	Wanchaivirus mEp234	0	0	1	0	18	12	0	0	0	0	0	19	0	8	28	1	2	6	0	31	0	0	1	0	1	1	0	0	5	0	0	0	0	0	0	0	0	0	0	0	4	1	0	0	0	0	0	0
d__Viruses|k__Heunggongvirae|p__Uroviricota|c__Caudoviricetes|s__Clostridium phage phiCT453A	Clostridium phage phiCT453A	122	1	0	1	0	0	0	0	0	0	0	0	3	2	5	1	0	0	0	1	1	0	0	0	0	0	0	0	0	0	0	0	0	0	0	0	0	0	0	0	0	0	0	0	0	0	0	0
d__Viruses|k__Heunggongvirae|p__Uroviricota|c__Caudoviricetes|g__Sherbrookevirus|s__Sherbrookevirus CD506	Sherbrookevirus CD506	16	0	0	0	0	0	0	0	0	0	0	0	0	0	0	0	0	0	0	30	0	4	0	1	0	0	2	0	0	0	0	0	0	0	0	0	0	0	0	0	0	0	0	0	0	0	9	0
d__Viruses|k__Heunggongvirae|p__Uroviricota|c__Caudoviricetes|s__Flyfo siphovirus Tbat1_6	Flyfo siphovirus Tbat1_6	0	0	0	0	0	0	0	0	0	62	59	0	0	0	2	0	0	0	0	0	0	6	0	0	0	0	0	0	4	0	0	0	0	0	0	0	0	0	0	0	0	0	0	0	0	0	0	0
d__Viruses|k__Heunggongvirae|p__Uroviricota|c__Caudoviricetes|s__Enterobacteria phage ES18	Enterobacteria phage ES18	0	0	0	0	0	0	39	0	1	6	1	0	0	0	54	3	3	0	0	0	0	4	0	0	0	0	0	0	0	0	0	2	1	0	0	0	3	0	0	0	0	1	0	0	0	8	0	0
d__Viruses|k__Heunggongvirae|p__Uroviricota|c__Caudoviricetes|f__Straboviridae|g__Jiaodavirus|s__Jiaodavirus kppv15	Jiaodavirus kppv15	2	50	0	0	0	0	0	0	0	8	39	0	1	0	7	1	0	0	0	0	0	5	0	0	0	0	0	0	3	0	0	4	0	0	0	0	0	0	1	0	0	0	0	0	0	0	0	0
d__Viruses|k__Heunggongvirae|p__Uroviricota|c__Caudoviricetes|s__Enterococcus phage vB_EfaS_IME197	Enterococcus phage vB_EfaS_IME197	0	0	15	0	0	4	9	1	4	19	0	0	0	5	14	0	0	4	3	0	0	0	0	2	0	2	0	6	2	2	6	3	0	0	0	0	0	0	0	4	1	4	0	0	0	0	3	1
d__Viruses|k__Heunggongvirae|p__Uroviricota|c__Caudoviricetes|g__Colneyvirus|s__Colneyvirus MMP02	Colneyvirus MMP02	2	0	0	0	0	0	0	0	0	0	0	0	0	0	0	0	0	0	0	7	0	0	0	0	0	0	0	0	0	0	0	0	0	0	0	0	0	0	0	0	0	0	0	0	0	0	9	0
d__Viruses|k__Heunggongvirae|p__Uroviricota|c__Caudoviricetes|g__Colneyvirus|s__Colneyvirus CDKM15	Colneyvirus CDKM15	4	0	0	0	0	2	0	0	0	0	0	0	0	0	0	0	0	0	0	6	0	0	0	0	0	1	0	0	0	0	0	0	0	0	0	0	0	0	0	0	0	0	0	0	0	0	38	0
d__Viruses|k__Heunggongvirae|p__Uroviricota|c__Caudoviricetes|f__Peduoviridae|s__Yersinia phage vB_YenM_42.18	Yersinia phage vB_YenM_42.18	1	0	8	0	1	1	0	0	0	0	0	22	0	0	0	2	0	0	0	40	3	6	0	0	0	1	0	0	9	0	1	0	0	0	1	0	1	1	0	0	0	1	0	0	0	4	1	0
d__Viruses|k__Heunggongvirae|p__Uroviricota|c__Caudoviricetes|g__Phifelvirus|s__Phifelvirus FL3	Phifelvirus FL3	0	0	16	0	0	0	0	20	0	42	0	3	0	0	2	0	0	8	0	2	0	0	0	0	0	0	0	0	0	0	5	0	0	0	0	0	1	0	0	0	0	0	0	0	0	0	0	0
d__Viruses|k__Heunggongvirae|p__Uroviricota|c__Caudoviricetes|g__Jerseyvirus|s__Jerseyvirus SE2	Jerseyvirus SE2	0	0	1	0	0	0	0	0	0	90	0	0	0	0	5	0	0	0	0	0	0	0	0	0	0	0	0	0	0	0	0	0	0	0	0	0	1	1	0	0	0	0	0	0	0	0	0	0
d__Viruses|k__Heunggongvirae|p__Uroviricota|c__Caudoviricetes|g__Lacnuvirus|s__Lacnuvirus LcNu	Lacnuvirus LcNu	0	0	0	0	0	8	3	0	1	1	0	0	4	7	18	0	0	0	0	12	0	0	0	0	6	0	0	0	0	0	0	0	0	0	0	0	0	1	0	0	36	0	0	0	0	0	0	0
d__Viruses|k__Heunggongvirae|p__Uroviricota|c__Caudoviricetes|o__Crassvirales|f__Suoliviridae|g__Culoivirus|s__Culoivirus americanus	Culoivirus americanus	0	0	24	0	0	0	0	0	0	0	0	0	0	0	0	0	1	0	0	0	0	0	27	9	0	26	0	0	0	0	0	0	0	0	0	0	0	1	2	0	0	1	0	0	0	0	0	1
d__Viruses|k__Heunggongvirae|p__Uroviricota|c__Caudoviricetes|g__Gofduovirus|s__Gofduovirus GF2	Gofduovirus GF2	10	10	4	0	1	1	3	3	0	0	7	0	0	0	2	0	0	1	0	2	2	7	3	0	0	0	3	1	1	3	0	0	0	2	0	0	2	0	0	17	0	0	0	0	0	2	0	0
d__Viruses|k__Heunggongvirae|p__Uroviricota|c__Caudoviricetes|g__Colneyvirus|s__Colneyvirus CD27	Colneyvirus CD27	1	0	0	0	0	0	0	0	0	0	0	0	0	0	0	0	0	0	0	4	0	0	0	0	0	0	0	0	0	0	0	0	0	0	0	0	0	0	0	0	0	0	0	0	0	0	42	0
d__Viruses|k__Heunggongvirae|p__Uroviricota|c__Caudoviricetes|f__Straboviridae|g__Chrysonvirus|s__Chrysonvirus as5	Chrysonvirus as5	1	2	0	0	2	2	15	3	1	4	12	0	0	0	1	4	0	0	0	0	0	0	1	0	0	2	0	1	0	0	5	3	1	1	2	2	0	1	0	1	0	0	0	1	0	2	1	1
d__Viruses|k__Heunggongvirae|p__Uroviricota|c__Caudoviricetes|g__Phifelvirus|s__Phifelvirus FL1	Phifelvirus FL1	0	0	1	0	0	0	11	18	0	37	0	2	0	0	5	0	0	7	0	0	0	0	1	0	0	0	0	0	0	0	0	0	0	0	0	0	0	0	0	0	0	0	0	0	0	0	0	0
d__Viruses|k__Heunggongvirae|p__Uroviricota|c__Caudoviricetes|g__Behunavirus|s__Behunavirus BH1	Behunavirus BH1	0	0	0	0	0	11	0	0	0	0	0	0	0	7	12	0	0	9	0	13	0	0	0	0	4	0	1	0	0	0	0	0	0	0	0	0	0	0	0	0	17	0	0	1	0	0	0	0
d__Viruses|k__Heunggongvirae|p__Uroviricota|c__Caudoviricetes|g__Brussowvirus|s__Streptococcus phage TP-778L	Streptococcus phage TP-778L	0	2	6	0	0	4	2	0	0	2	0	0	0	0	0	0	0	44	0	2	0	0	3	0	0	0	0	1	3	1	0	0	0	0	0	0	0	0	1	0	0	0	0	0	0	0	1	2
d__Viruses|k__Heunggongvirae|p__Uroviricota|c__Caudoviricetes|g__Roufvirus|s__Roufvirus pIS4A	Roufvirus pIS4A	0	20	0	0	0	0	0	0	0	15	33	0	0	0	0	0	0	2	0	0	0	3	0	0	0	0	0	0	0	0	0	0	0	0	0	0	0	0	0	0	0	0	0	0	0	0	0	0
d__Viruses|k__Heunggongvirae|p__Uroviricota|c__Caudoviricetes|f__Peduoviridae|g__Reginaelenavirus|s__Reginaelenavirus rv3LV2017	Reginaelenavirus rv3LV2017	0	6	0	0	0	0	0	0	0	0	0	1	12	0	9	2	4	33	0	0	0	0	0	0	0	0	0	0	0	0	0	1	0	0	0	0	0	0	0	0	0	0	0	0	0	0	0	0
d__Viruses|k__Heunggongvirae|p__Uroviricota|c__Caudoviricetes|s__Klebsiella phage VLCpiS13e	Klebsiella phage VLCpiS13e	0	0	0	0	0	0	0	0	0	14	41	0	0	0	1	0	0	1	0	0	0	1	0	0	1	0	0	0	0	0	0	0	0	0	0	0	0	0	0	0	0	0	1	0	2	0	0	0
d__Viruses|k__Heunggongvirae|p__Uroviricota|c__Caudoviricetes|f__Mesyanzhinovviridae|s__Stenotrophomonas phage A1432	Stenotrophomonas phage A1432	0	0	0	0	0	0	0	0	1	0	0	0	0	4	0	0	1	0	0	0	1	0	2	2	0	4	3	0	1	1	4	2	0	0	0	0	0	2	0	6	3	2	5	0	0	5	4	0
d__Viruses|k__Heunggongvirae|p__Uroviricota|c__Caudoviricetes|f__Peduoviridae|g__Eganvirus|s__Eganvirus SEN1	Eganvirus SEN1	0	0	0	0	0	0	0	0	0	0	2	0	0	0	0	55	0	0	0	0	0	0	0	0	0	0	0	0	0	0	0	0	0	0	0	0	0	0	0	0	0	2	0	0	0	0	0	0
d__Viruses|k__Heunggongvirae|p__Uroviricota|c__Caudoviricetes|g__Colneyvirus|s__Colneyvirus CDKM9	Colneyvirus CDKM9	6	0	0	0	0	0	0	0	0	0	0	0	0	0	0	0	0	0	0	6	0	0	0	0	0	0	0	0	0	0	0	0	0	0	0	0	0	0	0	1	0	0	0	0	0	0	19	0
d__Viruses|k__Heunggongvirae|p__Uroviricota|c__Caudoviricetes|g__Colneyvirus|s__Colneyvirus CD505	Colneyvirus CD505	4	0	0	0	0	1	0	0	0	0	0	0	0	0	0	0	0	0	0	4	0	1	0	0	0	0	0	0	0	0	0	0	0	0	0	0	0	0	0	0	0	0	0	0	0	0	15	0
d__Viruses|k__Heunggongvirae|p__Uroviricota|c__Caudoviricetes|s__Clostridium phage c-st	Clostridium phage c-st	1	3	0	0	0	0	0	1	0	1	0	0	0	0	0	1	0	0	0	0	0	0	1	0	0	0	0	0	0	1	0	1	0	0	0	0	3	0	0	0	0	4	11	0	0	8	0	3
d__Viruses|k__Heunggongvirae|p__Uroviricota|c__Caudoviricetes|g__Phifelvirus|s__Phifelvirus FL2	Phifelvirus FL2	0	0	5	0	2	0	0	0	0	18	0	2	0	0	7	0	0	7	0	1	0	0	0	0	0	0	0	0	0	0	0	0	0	0	0	0	0	0	0	0	0	0	0	0	0	0	0	0
d__Viruses|k__Heunggongvirae|p__Uroviricota|c__Caudoviricetes|s__Enterococcus phage phiFL4A	Enterococcus phage phiFL4A	0	0	0	0	0	0	10	0	2	13	0	0	0	0	3	0	0	0	0	0	0	0	2	0	0	0	0	0	0	0	0	0	0	0	0	0	1	0	0	0	0	0	0	0	0	0	3	0
d__Viruses|k__Heunggongvirae|p__Uroviricota|c__Caudoviricetes|s__Enterococcus phage EFC-1	Enterococcus phage EFC-1	0	0	6	0	0	0	0	0	0	6	0	0	0	0	7	0	5	5	0	2	0	0	0	0	0	0	0	0	0	0	0	0	0	0	0	0	0	1	0	0	0	0	0	0	0	0	0	0
d__Viruses|k__Heunggongvirae|p__Uroviricota|c__Caudoviricetes|f__Peduoviridae|g__Irrigatiovirus|s__Irrigatiovirus SI7	Irrigatiovirus SI7	0	1	0	0	9	0	0	0	0	0	0	0	0	0	9	0	0	0	0	0	0	0	1	0	0	0	5	0	1	0	0	0	0	0	0	0	0	0	0	0	0	0	0	0	0	0	0	0
d__Viruses|k__Heunggongvirae|p__Uroviricota|c__Caudoviricetes|o__Crassvirales|f__Intestiviridae|g__Drivevirus|s__Drivevirus gastrointestinalis	Drivevirus gastrointestinalis	0	0	0	1	0	0	0	1	0	0	0	0	0	1	0	0	0	0	0	0	0	19	0	0	0	0	0	1	0	0	0	0	0	0	0	0	0	0	0	0	0	0	0	0	0	2	0	0
d__Viruses|k__Heunggongvirae|p__Uroviricota|c__Caudoviricetes|f__Peduoviridae|g__Novemvirus|s__Novemvirus T5282H	Novemvirus T5282H	0	1	0	0	0	0	0	0	0	0	0	0	0	0	1	0	1	1	1	0	0	0	1	0	0	0	0	0	0	0	0	0	1	0	0	0	0	0	0	0	0	0	0	0	0	0	0	0
d__Viruses|k__Heunggongvirae|p__Uroviricota|c__Caudoviricetes|f__Straboviridae|g__Jiaodavirus|s__Jiaodavirus kpv477	Jiaodavirus kpv477	0	0	0	0	0	0	0	1	0	0	0	3	1	0	0	0	0	2	0	0	0	0	0	2	0	0	0	0	0	0	0	0	0	0	0	0	1	0	0	0	0	0	0	0	0	0	0	0
d__Viruses|k__Heunggongvirae|p__Uroviricota|c__Caudoviricetes|o__Crassvirales|f__Intestiviridae|g__Diorhovirus|s__Diorhovirus intestinalis	Diorhovirus intestinalis	0	1	0	0	0	0	0	0	0	0	0	0	1	0	0	0	0	0	0	0	1	0	0	0	0	0	0	0	0	5	0	0	0	0	1	0	0	0	0	0	0	0	0	0	0	0	0	0
d__Viruses|k__Heunggongvirae|p__Uroviricota|c__Caudoviricetes|f__Peduoviridae|g__Senquatrovirus|s__Senquatrovirus SEN4	Senquatrovirus SEN4	0	0	0	0	0	0	0	0	0	0	0	0	0	0	1	0	0	0	0	0	0	0	0	1	0	0	0	0	5	0	0	0	0	0	0	0	0	0	0	0	0	0	0	0	0	0	0	0
d__Viruses|k__Heunggongvirae|p__Uroviricota|c__Caudoviricetes|f__Vilmaviridae|g__Bongovirus|s__Bongovirus bongo	Bongovirus bongo	1	0	0	0	0	0	0	0	0	0	1	0	0	0	0	0	1	0	0	0	0	0	0	0	0	1	0	0	0	1	0	0	0	0	0	0	0	0	0	1	0	0	0	0	0	0	0	0
d__Viruses|k__Heunggongvirae|p__Uroviricota|c__Caudoviricetes|s__Klebsiella phage vB_KpnS-Carvaje	Klebsiella phage vB_KpnS-Carvaje	0	0	0	0	0	1	0	0	0	0	0	0	0	0	0	0	0	1	0	0	0	0	0	0	0	0	0	0	0	0	0	0	0	0	0	0	0	0	0	0	0	2	0	0	0	0	0	1
d__Viruses|k__Heunggongvirae|p__Uroviricota|c__Caudoviricetes|s__Klebsiella phage VLCpiS13a	Klebsiella phage VLCpiS13a	0	0	0	0	0	0	0	0	0	0	0	0	0	0	0	0	0	1	0	0	0	0	0	0	0	0	1	0	0	0	0	0	0	0	0	0	0	0	0	0	0	0	0	0	0	0	1	0
d__Viruses|k__Heunggongvirae|p__Uroviricota|c__Caudoviricetes|g__Kagunavirus|s__Kagunavirus K1ind1	Kagunavirus K1ind1	0	0	0	0	0	0	0	0	1	0	0	0	0	0	0	0	0	0	0	0	0	0	0	0	1	0	0	0	0	0	0	0	0	0	0	0	0	0	0	0	0	0	0	0	0	0	0	0
d__Viruses|k__Heunggongvirae|p__Uroviricota|c__Caudoviricetes|g__Kagunavirus|s__Kagunavirus K1H	Kagunavirus K1H	0	0	0	0	0	0	0	0	0	0	0	0	0	0	0	0	0	0	0	0	0	0	0	0	0	0	1	0	0	0	0	0	0	0	0	0	0	0	0	0	0	0	0	0	0	0	1	0
d__Viruses|k__Heunggongvirae|p__Uroviricota|c__Caudoviricetes|g__Kagunavirus|s__Kagunavirus RP180	Kagunavirus RP180	0	0	0	0	0	0	0	0	0	0	0	0	0	0	0	0	0	0	0	0	0	0	0	1	0	0	0	0	0	0	0	0	0	0	0	0	0	0	0	0	0	0	0	0	0	0	0	0
d__Viruses|k__Heunggongvirae|p__Uroviricota|c__Caudoviricetes|g__Jerseyvirus|s__Jerseyvirus jersey	Jerseyvirus jersey	0	0	1	0	0	0	0	0	0	0	0	0	0	0	0	0	0	0	0	0	0	0	0	0	0	0	0	0	0	0	0	0	0	0	0	0	0	0	0	0	0	0	0	0	0	0	0	0
d__Viruses|k__Heunggongvirae|p__Uroviricota|c__Caudoviricetes|f__Ackermannviridae|g__Taipeivirus|s__Taipeivirus menlow	Taipeivirus menlow	0	0	0	0	0	0	0	0	0	0	0	0	0	0	0	0	0	0	0	0	0	0	0	0	0	0	0	0	0	0	0	0	0	0	0	0	0	0	0	0	0	0	0	0	0	0	1	0
d__Viruses|k__Heunggongvirae|p__Uroviricota|c__Caudoviricetes|g__Kagunavirus|s__Kagunavirus golestan	Kagunavirus golestan	0	0	0	0	0	0	0	0	0	0	0	0	0	0	0	0	0	0	0	0	0	0	0	0	0	0	0	0	0	0	0	0	0	0	0	0	0	0	0	0	0	0	0	0	0	0	0	0
d__Viruses|k__Heunggongvirae|p__Uroviricota|c__Caudoviricetes|g__Kagunavirus|s__Kagunavirus K1G	Kagunavirus K1G	0	0	0	0	0	0	0	0	0	0	0	0	0	0	0	0	0	0	0	0	0	0	0	0	0	0	0	0	0	0	0	0	0	0	0	0	0	0	0	0	0	0	0	0	0	0	0	0
d__Viruses|k__Heunggongvirae|p__Uroviricota|c__Caudoviricetes|g__Kagunavirus|s__Kagunavirus K1ind2	Kagunavirus K1ind2	0	0	0	0	0	0	0	0	0	0	0	0	0	0	0	0	0	0	0	0	0	0	0	0	0	0	0	0	0	0	0	0	0	0	0	0	0	0	0	0	0	0	0	0	0	0	0	0
d__Viruses|k__Heunggongvirae|p__Uroviricota|c__Caudoviricetes|g__Jerseyvirus|s__Salmonella phage CTH7	Salmonella phage CTH7	0	0	0	0	0	0	0	0	0	0	0	0	0	0	0	0	0	0	0	0	0	0	0	0	0	0	0	0	0	0	0	0	0	0	0	0	0	0	0	0	0	0	0	0	0	0	0	0
[truncated: 264 more columns]
