# Supplementary material for: Indigenous infants in remote Australia retain an ancestral gut microbiome despite encroaching Westernization
Source: Research Square preprint supplement (doi:10.21203/rs.3.rs-6101879/v1), 2025-03-13
Supplement: Supplementary file 4 [file d566a32388c042362b693966.xlsx]

## Sheet: raw counts
		SeqID	elcho01	elcho02	elcho03	elcho04	elcho05	elcho06	elcho07	elcho08	elcho09	elcho10	elcho11	elcho12	elcho13	elcho14	elcho15	elcho16	elcho17	elcho18	elcho19	elcho20	elcho21	elcho22	elcho23	elcho24	elcho25	elcho26	elcho27	elcho28	elcho29	elcho30	elcho31	elcho32	elcho33	elcho34	elcho35	elcho36	elcho37	elcho38	elcho39	elcho40	elcho41	elcho42	elcho43	elcho44	elcho45	elcho46	elcho47
		Study	elcho	elcho	elcho	elcho	elcho	elcho	elcho	elcho	elcho	elcho	elcho	elcho	elcho	elcho	elcho	elcho	elcho	elcho	elcho	elcho	elcho	elcho	elcho	elcho	elcho	elcho	elcho	elcho	elcho	elcho	elcho	elcho	elcho	elcho	elcho	elcho	elcho	elcho	elcho	elcho	elcho	elcho	elcho	elcho	elcho	elcho	elcho
		Age_days	35	35	56	60	100	149	164	166	214	217	245	279	308	311	332	356	367	405	436	441	549	571	594	617	22	47	118	147	160	205	228	240	250	285	329	333	346	374	380	382	431	462	463	476	476	511	511
		Sex	F	F	F	F	F	F	F	F	F	F	F	F	F	F	F	F	F	F	F	F	F	F	F	F	M	M	M	M	M	M	M	M	M	M	M	M	M	M	M	M	M	M	M	M	M	M	M
		Pair	2	3	5	7	6	11	8	13	15	16	17	21	23	24	25	28	29	35	39	37	45	46	50	49	1	4	10	9	12	14	18	20	19	22	26	31	27	30	32	33	36	40	38	34	41	42	43
	p		elcho01	elcho02	elcho03	elcho04	elcho05	elcho06	elcho07	elcho08	elcho09	elcho10	elcho11	elcho12	elcho13	elcho14	elcho15	elcho16	elcho17	elcho18	elcho19	elcho20	elcho21	elcho22	elcho23	elcho24	elcho25	elcho26	elcho27	elcho28	elcho29	elcho30	elcho31	elcho32	elcho33	elcho34	elcho35	elcho36	elcho37	elcho38	elcho39	elcho40	elcho41	elcho42	elcho43	elcho44	elcho45	elcho46	elcho47
	d__Bacteria;p__Actinobacteriota	Actinobacteriota	6420519	3403839	3872813	1956233	10387351	3654885	4183180	1816753	8462945	7109292	27950	940672	1392594	7945	2601082	6017187	828998	2400254	21724	68987	1694046	92378	324234	3165067	81726	7416190	8033990	6642637	8706153	3632884	1828388	2122658	1686964	116664	8122451	395012	4797416	505803	481745	480742	5096346	87248	597995	1790999	1269174	1331025	530886
	d__Bacteria;p__Bacteroidota	Bacteroidota	0	2954134	9184	2296707	5729	0	0	9522619	2907	7323	9375472	165276	4959535	6894694	8874053	8574	5510797	6700326	1208442	11806753	3270691	6299655	4685344	6475455	0	0	6241	0	0	206772	7631968	67431	1647	7600679	473912	5255252	4615097	10983363	7266519	8044261	1168116	4682607	9335248	855	71854	5442894	10311554
	d__Bacteria;p__Campylobacterota	Campylobacterota	0	214	263	0	0	7586	0	0	0	0	210338	0	0	25779	0	0	0	0	0	0	8825	0	0	0	0	0	0	0	0	0	257	0	0	0	0	0	0	0	0	0	0	0	101	0	0	0	0
	d__Bacteria;p__Cyanobacteria	Cyanobacteria	0	0	0	0	0	0	0	0	0	0	96703	0	0	195687	0	0	0	0	0	0	67793	8759	0	0	0	0	0	0	0	0	0	0	0	0	0	0	0	36946	0	0	0	0	0	0	0	0	0
	d__Bacteria;p__Desulfobacterota_I	Desulfobacterota_I	0	0	0	0	0	0	0	0	0	2365	19156	0	0	27729	9028	15293	50578	6338	3167	20688	33916	92212	8242	24719	0	0	0	0	0	0	32431	0	0	0	0	0	29395	0	7265	25948	0	16798	0	0	1083	3273	340
	d__Bacteria;p__Firmicutes	Firmicutes_	730283	376160	4609730	153442	344149	493295	1497444	32867	486246	483222	164613	1073101	286594	406845	33483	243499	45254	92219	47313	60330	103812	317875	83743	270055	266255	307994	988750	109977	335625	148667	111295	3646586	124053	12925	77795	58263	115419	166576	20307	7589	259363	231813	90663	1452586	1121262	30971	14274
	d__Bacteria;p__Firmicutes_A	Firmicutes_A	295858	1489717	0	532105	4753	536023	15612	137430	230165	483083	2291529	44780	2078447	3471513	930175	3268513	713453	1461562	2330741	1233120	1251421	4191654	5904333	535763	10601102	29320	328	0	0	907584	170099	4544	329854	100677	0	3519265	1512903	2304998	2047325	221365	198517	5316384	397830	1027921	5355229	3094282	1813276
	d__Bacteria;p__Firmicutes_B	Firmicutes_B	0	0	0	0	0	5056	0	0	0	0	0	0	0	0	0	0	0	0	0	0	0	0	0	0	0	0	0	0	0	0	0	0	0	0	0	0	0	0	0	0	0	152	86	0	0	0	0
	d__Bacteria;p__Firmicutes_C	Firmicutes_C	25300	2829650	285749	239868	1566	1977460	2111137	3364	522570	2085323	220770	444644	1484426	197445	266958	1112282	592080	425502	246646	124829	393252	140307	206668	927550	0	2833	9074	1607727	0	3279303	907519	316446	373642	1818	0	542959	368859	58763	437370	1537478	4348782	37016	1173454	5278014	2368481	140901	26565
	d__Bacteria;p__Fusobacteriota	Fusobacteriota	0	0	3668	0	0	468	0	0	0	0	0	0	0	0	236	1117	1335	0	0	0	0	0	0	0	0	0	0	9874	0	0	2983	9893	0	0	0	0	0	0	0	3289	57	0	0	11229	16292	750	0
	d__Bacteria;p__Patescibacteria	Patescibacteria	11914	614	4012	0	17863	0	8142	0	0	0	0	0	0	0	0	124	0	0	0	0	0	0	0	0	0	0	79605	0	0	0	0	2310	2058	0	0	47	1014	0	0	0	0	0	0	0	0	0	0
	d__Bacteria;p__Proteobacteria	Proteobacteria	2177288	1158366	792130	150334	636889	4861945	1345146	253116	2118250	572546	14919	443728	667803	33024	9624	1179014	577744	332526	25526	116474	16872	180862	55435	382522	1201055	88939	1478904	1170291	2786688	177799	1970342	1661557	2414145	3264546	119208	1271877	258639	67677	116796	1522303	182773	62185	27634	2164462	788037	131720	1853
	d__Bacteria;p__Synergistota	Synergistota	0	0	0	0	0	0	0	0	0	0	0	0	0	0	4240	0	0	0	0	0	0	0	0	0	0	0	0	0	0	0	0	0	0	0	0	0	0	0	0	42317	0	29313	0	0	1968	0	0
	d__Bacteria;p__Verrucomicrobiota	Verrucomicrobiota	0	0	0	0	0	0	0	0	0	0	121337	0	14849	24626	0	0	747997	0	10693	229	0	321170	25525	7000	0	0	0	73675	0	326842	0	0	294784	0	0	179588	1432	154196	3835	808775	61762	44223	0	0	0	581074	8718
	c		elcho01	elcho02	elcho03	elcho04	elcho05	elcho06	elcho07	elcho08	elcho09	elcho10	elcho11	elcho12	elcho13	elcho14	elcho15	elcho16	elcho17	elcho18	elcho19	elcho20	elcho21	elcho22	elcho23	elcho24	elcho25	elcho26	elcho27	elcho28	elcho29	elcho30	elcho31	elcho32	elcho33	elcho34	elcho35	elcho36	elcho37	elcho38	elcho39	elcho40	elcho41	elcho42	elcho43	elcho44	elcho45	elcho46	elcho47
	d__Bacteria;p__Actinobacteriota;c__Actinomycetia	Actinomycetia	6416342	1884877	3768951	1929921	10369394	3547554	4171944	1813110	3842741	6066789	12208	904695	806934	1268	1825747	3834716	442455	1574720	18500	51049	1288607	73409	113897	2133704	80997	7409022	8010933	6199424	7562686	3175107	1747299	2120484	1568665	116664	8103001	240861	4610167	403879	362678	357098	4592872	75559	482958	1786393	1241754	1213397	501783
	d__Bacteria;p__Proteobacteria;c__Alphaproteobacteria	Alphaproteobacteria	0	0	0	0	0	0	0	0	0	0	0	0	0	19892	0	0	0	0	0	0	0	0	0	0	0	0	0	0	0	0	0	0	0	0	0	0	0	0	0	0	0	0	0	0	0	152	0
	d__Bacteria;p__Firmicutes;c__Bacilli	Bacilli	730283	376160	4609730	153442	344149	493295	1497444	32867	486246	483222	164613	1073101	286594	406845	33483	243499	45254	92219	47313	60330	103812	317875	83743	270055	266255	307994	988750	109977	335625	148667	111295	3646586	124053	12925	77795	58263	115419	166576	20307	7589	259363	231813	90663	1452586	1121262	30971	14274
	d__Bacteria;p__Bacteroidota;c__Bacteroidia	Bacteroidia	0	2954134	9184	2296707	5729	0	0	9522619	2907	7323	9375472	165276	4959535	6894694	8874053	8574	5510797	6700326	1208442	11806753	3270691	6299655	4685344	6475455	0	0	6241	0	0	206772	7631968	67431	1647	7600679	473912	5255252	4615097	10983363	7266519	8044261	1168116	4682607	9335248	855	71854	5442894	10311554
	d__Bacteria;p__Campylobacterota;c__Campylobacteria	Campylobacteria	0	214	263	0	0	7586	0	0	0	0	210338	0	0	25779	0	0	0	0	0	0	8825	0	0	0	0	0	0	0	0	0	257	0	0	0	0	0	0	0	0	0	0	0	101	0	0	0	0
	d__Bacteria;p__Firmicutes_A;c__Clostridia	Clostridia	295858	1489717	0	532105	4753	536023	15612	137430	230165	483083	2291529	44780	2078447	3471513	930175	3268513	713453	1461562	2330741	1233120	1251421	4191654	5904333	535763	10601102	29320	328	0	0	907584	170099	4544	329854	100677	0	3519265	1512903	2304998	2047325	221365	198517	5316384	397830	1027921	5355229	3094282	1813276
	d__Bacteria;p__Actinobacteriota;c__Coriobacteriia	Coriobacteriia	4177	1518962	103862	26312	17957	107331	11236	3643	4620204	1042503	15742	35977	585660	6677	775335	2182471	386543	825534	3224	17938	405439	18969	210337	1031363	729	7168	23057	443213	1143467	457777	81089	2174	118299	0	19450	154151	187249	101924	119067	123644	503474	11689	115037	4606	27420	117628	29103
	d__Bacteria;p__Desulfobacterota_I;c__Desulfovibrionia	Desulfovibrionia	0	0	0	0	0	0	0	0	0	2365	19156	0	0	27729	9028	15293	50578	6338	3167	20688	33916	92212	8242	24719	0	0	0	0	0	0	32431	0	0	0	0	0	29395	0	7265	25948	0	16798	0	0	1083	3273	340
	d__Bacteria;p__Fusobacteriota;c__Fusobacteriia	Fusobacteriia	0	0	3668	0	0	468	0	0	0	0	0	0	0	0	236	1117	1335	0	0	0	0	0	0	0	0	0	0	9874	0	0	2983	9893	0	0	0	0	0	0	0	3289	57	0	0	11229	16292	750	0
	d__Bacteria;p__Proteobacteria;c__Gammaproteobacteria	Gammaproteobacteria	2177288	1158366	792130	150334	636889	4861945	1345146	253116	2118250	572546	14919	443728	667803	13132	9624	1179014	577744	332526	25526	116474	16872	180862	55435	382522	1201055	88939	1478904	1170291	2786688	177799	1970342	1661557	2414145	3264546	119208	1271877	258639	67677	116796	1522303	182773	62185	27634	2164462	788037	131568	1853
	d__Bacteria;p__Firmicutes_C;c__Negativicutes	Negativicutes	25300	2829650	285749	239868	1566	1977460	2111137	3364	522570	2085323	220770	444644	1484426	197445	266958	1112282	592080	425502	246646	124829	393252	140307	206668	927550	0	2833	9074	1607727	0	3279303	907519	316446	373642	1818	0	542959	368859	58763	437370	1537478	4348782	37016	1173454	5278014	2368481	140901	26565
	d__Bacteria;p__Firmicutes_B;c__Peptococcia	Peptococcia	0	0	0	0	0	5056	0	0	0	0	0	0	0	0	0	0	0	0	0	0	0	0	0	0	0	0	0	0	0	0	0	0	0	0	0	0	0	0	0	0	0	152	86	0	0	0	0
	d__Bacteria;p__Patescibacteria;c__Saccharimonadia	Saccharimonadia	11914	614	4012	0	17863	0	8142	0	0	0	0	0	0	0	0	124	0	0	0	0	0	0	0	0	0	0	79605	0	0	0	0	2310	2058	0	0	47	1014	0	0	0	0	0	0	0	0	0	0
	d__Bacteria;p__Synergistota;c__Synergistia	Synergistia	0	0	0	0	0	0	0	0	0	0	0	0	0	0	4240	0	0	0	0	0	0	0	0	0	0	0	0	0	0	0	0	0	0	0	0	0	0	0	0	42317	0	29313	0	0	1968	0	0
	d__Bacteria;p__Cyanobacteria;c__Vampirovibrionia	Vampirovibrionia	0	0	0	0	0	0	0	0	0	0	96703	0	0	195687	0	0	0	0	0	0	67793	8759	0	0	0	0	0	0	0	0	0	0	0	0	0	0	0	36946	0	0	0	0	0	0	0	0	0
	d__Bacteria;p__Verrucomicrobiota;c__Verrucomicrobiae	Verrucomicrobiae	0	0	0	0	0	0	0	0	0	0	121337	0	14849	15525	0	0	747997	0	10693	229	0	321170	25525	7000	0	0	0	73675	0	326842	0	0	294784	0	0	179588	1432	154196	3835	808775	61762	44223	0	0	0	580923	8718
	o		elcho01	elcho02	elcho03	elcho04	elcho05	elcho06	elcho07	elcho08	elcho09	elcho10	elcho11	elcho12	elcho13	elcho14	elcho15	elcho16	elcho17	elcho18	elcho19	elcho20	elcho21	elcho22	elcho23	elcho24	elcho25	elcho26	elcho27	elcho28	elcho29	elcho30	elcho31	elcho32	elcho33	elcho34	elcho35	elcho36	elcho37	elcho38	elcho39	elcho40	elcho41	elcho42	elcho43	elcho44	elcho45	elcho46	elcho47
	d__Bacteria;p__Firmicutes_C;c__Negativicutes;o__Acidaminococcales	Acidaminococcales	0	0	0	10883	0	0	0	0	0	43817	199804	0	13633	129936	117289	380720	101060	4187	80965	0	3326	0	3710	10145	0	0	0	0	0	7748	284664	10122	75294	1818	0	7744	7126	0	0	217474	38954	286	4275	0	130794	0	0
	d__Bacteria;p__Actinobacteriota;c__Actinomycetia;o__Actinomycetales	Actinomycetales	6416342	1884877	3768951	1929921	10369394	3546725	4171944	1813110	3842741	6066789	12208	904695	806934	1268	1825747	3833778	442455	1574720	18500	51049	1288607	73409	113897	2133704	80997	7409022	8010274	6199424	7562686	3175107	1747299	2120484	1568665	116664	8103001	240861	4610167	403879	362678	357098	4592872	75559	482958	1786393	1241754	1213397	501783
	d__Bacteria;p__Bacteroidota;c__Bacteroidia;o__Bacteroidales	Bacteroidales	0	2954134	9184	2296707	5729	0	0	9522619	2907	7323	9375472	165276	4959535	6894694	8874053	8574	5510797	6700326	1208442	11806753	3270691	6297952	4685344	6475455	0	0	6241	0	0	206772	7631968	67431	1647	7600679	473912	5255252	4615097	10983363	7266519	8044261	1168116	4682607	9335248	855	71854	5442894	10311554
	d__Bacteria;p__Proteobacteria;c__Gammaproteobacteria;o__Burkholderiales	Burkholderiales	0	72581	0	10819	0	4174109	0	48303	142205	84610	11516	67541	17272	7150	4104	361907	50550	17427	7338	2267	13183	971	10222	160475	0	0	0	3018	0	2617	143933	150267	101477	0	0	899803	68387	24552	13016	457819	77151	52934	1666	18862	653886	2685	1083
	d__Bacteria;p__Campylobacterota;c__Campylobacteria;o__Campylobacterales	Campylobacterales	0	214	263	0	0	7586	0	0	0	0	210338	0	0	25779	0	0	0	0	0	0	8825	0	0	0	0	0	0	0	0	0	257	0	0	0	0	0	0	0	0	0	0	0	101	0	0	0	0
	d__Bacteria;p__Firmicutes_A;c__Clostridia;o__Christensenellales	Christensenellales	0	0	0	0	0	0	0	0	0	114	17796	0	2669	100663	630	0	0	114	958	0	95	10005	0	0	0	0	0	0	0	0	0	0	0	0	0	0	0	2312	0	0	0	142194	0	0	3521	2509	1532
	d__Bacteria;p__Firmicutes_A;c__Clostridia;o__Clostridiales	Clostridiales	137309	0	0	48428	0	224891	14534	22003	110661	54382	0	0	1797	20558	0	6719	0	0	0	333	0	6140	70990	0	6642453	0	0	0	0	42129	0	4050	38152	0	0	0	0	0	0	0	0	0	1420	0	540	3125	0
	d__Bacteria;p__Actinobacteriota;c__Coriobacteriia;o__Coriobacteriales	Coriobacteriales	4177	1518962	103862	26312	17957	107331	11236	3643	4620204	1042503	15742	35977	585660	6677	775335	2182471	386543	825534	3224	17938	405439	18969	210337	1031363	729	7168	23057	443213	1143467	457777	81089	2174	118299	0	19450	154151	187249	101924	119067	123644	503474	11689	115037	4606	27420	117628	29103
	d__Bacteria;p__Desulfobacterota_I;c__Desulfovibrionia;o__Desulfovibrionales	Desulfovibrionales	0	0	0	0	0	0	0	0	0	2365	19156	0	0	27729	9028	15293	50578	6338	3167	20688	33916	92212	8242	24719	0	0	0	0	0	0	32431	0	0	0	0	0	29395	0	7265	25948	0	16798	0	0	1083	3273	340
	d__Bacteria;p__Proteobacteria;c__Gammaproteobacteria;o__Enterobacterales	Enterobacterales	2177288	1085785	792130	139515	636889	687836	1345146	204813	1976045	487936	3403	376187	650531	5982	5520	817107	527194	315099	18188	114207	3689	179891	45213	222047	1201055	88939	1478904	1167273	2786688	175182	1826409	1511290	2312668	3240828	119208	372074	190252	43125	103780	1064484	105622	9251	25968	2145600	134151	128883	770
	d__Bacteria;p__Firmicutes;c__Bacilli;o__Erysipelotrichales	Erysipelotrichales	0	15746	0	74438	0	0	0	0	0	31346	159524	0	23440	219222	11915	14916	32410	63335	5955	58773	36729	93919	42256	30778	0	0	0	0	0	50429	33629	0	4550	0	0	4326	69651	108921	9796	6547	60772	24526	60512	144253	53949	28537	13220
	d__Bacteria;p__Firmicutes_A;c__Clostridia;o__Eubacteriales	Eubacteriales	0	0	0	41054	0	0	0	88238	0	0	0	0	0	0	1040	15	0	0	0	0	0	0	5719	0	0	0	0	0	0	182	1967	0	0	0	0	0	7706	0	0	1005	0	0	0	0	0	0	0
	d__Bacteria;p__Fusobacteriota;c__Fusobacteriia;o__Fusobacteriales	Fusobacteriales	0	0	3668	0	0	468	0	0	0	0	0	0	0	0	236	1117	1335	0	0	0	0	0	0	0	0	0	0	9874	0	0	2983	9893	0	0	0	0	0	0	0	3289	57	0	0	11229	16292	750	0
	d__Bacteria;p__Cyanobacteria;c__Vampirovibrionia;o__Gastranaerophilales	Gastranaerophilales	0	0	0	0	0	0	0	0	0	0	96703	0	0	195687	0	0	0	0	0	0	67793	8759	0	0	0	0	0	0	0	0	0	0	0	0	0	0	0	36946	0	0	0	0	0	0	0	0	0
	d__Bacteria;p__Firmicutes;c__Bacilli;o__Haloplasmatales_A	Haloplasmatales_A	0	0	0	0	0	0	0	0	0	0	0	0	0	0	0	0	0	0	0	0	0	0	0	0	0	0	0	0	0	0	0	0	0	0	0	0	0	0	0	0	0	0	0	0	0	0	0
	d__Bacteria;p__Firmicutes_A;c__Clostridia;o__Lachnospirales	Lachnospirales	158549	248145	0	304924	4753	6013	0	26708	114139	355958	1057247	44780	1020026	1285218	296079	903303	359766	320623	1125405	695784	226000	1376964	3489420	187415	3776553	29320	0	0	0	831671	161866	0	180866	0	0	3108613	614190	672029	847396	112013	98718	1590183	273135	411768	521193	1326534	1317553
	d__Bacteria;p__Firmicutes;c__Bacilli;o__Lactobacillales	Lactobacillales	618298	360414	4212536	79004	344149	488976	1493086	32867	486246	451876	579	1073101	263154	17485	21568	228583	12844	28884	991	1557	11414	16088	34517	239277	266255	281344	976376	109977	335625	98238	74228	3610706	119503	12925	77795	53937	45768	56812	10511	1042	189523	25	30151	1308333	1067313	2434	0
	d__Bacteria;p__Actinobacteriota;c__Actinomycetia;o__Mycobacteriales	Mycobacteriales	0	0	0	0	0	829	0	0	0	0	0	0	0	0	0	938	0	0	0	0	0	0	0	0	0	0	659	0	0	0	0	0	0	0	0	0	0	0	0	0	0	0	0	0	0	0	0
	d__Bacteria;p__Firmicutes_A;c__Clostridia;o__Oscillospirales	Oscillospirales	0	1241572	0	136343	0	0	0	0	0	61963	1116783	0	1050749	1997870	580782	2338550	351243	1115950	1156195	497430	1021561	2603381	2337548	300548	174574	0	0	0	0	29468	0	0	93986	100507	0	337296	889830	1603150	1199621	106212	99799	2692939	122625	616153	4829975	1727082	488703
	d__Bacteria;p__Firmicutes_B;c__Peptococcia;o__Peptococcales	Peptococcales	0	0	0	0	0	5056	0	0	0	0	0	0	0	0	0	0	0	0	0	0	0	0	0	0	0	0	0	0	0	0	0	0	0	0	0	0	0	0	0	0	0	152	86	0	0	0	0
	d__Bacteria;p__Firmicutes_A;c__Clostridia;o__Peptostreptococcales	Peptostreptococcales	0	0	0	1356	0	3514	110	481	4599	10666	50745	0	3206	19801	51644	19926	2408	24875	7201	139	3765	38208	656	47800	7522	0	0	0	0	3563	6266	0	16850	170	0	0	1177	12221	308	1867	0	3383	650	0	0	25052	2841
	d__Bacteria;p__Actinobacteriota;c__Actinomycetia;o__Propionibacteriales	Propionibacteriales	0	0	0	0	0	0	0	0	0	0	0	0	0	0	0	0	0	0	0	0	0	0	0	0	0	0	0	0	0	0	0	0	0	0	0	0	0	0	0	0	0	0	0	0	0	0	0
	d__Bacteria;p__Proteobacteria;c__Alphaproteobacteria;o__RF32	RF32	0	0	0	0	0	0	0	0	0	0	0	0	0	19892	0	0	0	0	0	0	0	0	0	0	0	0	0	0	0	0	0	0	0	0	0	0	0	0	0	0	0	0	0	0	0	152	0
	d__Bacteria;p__Firmicutes;c__Bacilli;o__RF39	RF39	0	0	0	0	0	0	0	0	0	0	2803	0	0	164901	0	0	0	0	36573	0	18791	205783	6970	0	0	0	0	0	0	0	0	0	0	0	0	0	0	843	0	0	0	207262	0	0	0	0	1054
	d__Bacteria;p__Firmicutes;c__Bacilli;o__RFN20	RFN20	0	0	0	0	0	0	0	0	0	0	1707	0	0	5237	0	0	0	0	3794	0	36878	2085	0	0	0	0	0	0	0	0	0	0	0	0	0	0	0	0	0	0	0	0	0	0	0	0	0
	d__Bacteria;p__Patescibacteria;c__Saccharimonadia;o__Saccharimonadales	Saccharimonadales	11914	614	4012	0	17863	0	8142	0	0	0	0	0	0	0	0	124	0	0	0	0	0	0	0	0	0	0	79605	0	0	0	0	2310	2058	0	0	47	1014	0	0	0	0	0	0	0	0	0	0
	d__Bacteria;p__Firmicutes_C;c__Negativicutes;o__Selenomonadales	Selenomonadales	0	0	0	109	0	0	0	0	0	0	0	0	0	7211	1308	0	28431	2891	0	12546	7596	0	7855	0	0	0	0	0	0	0	0	0	0	0	0	0	0	21409	135986	148233	61642	0	2386	0	0	0	0
	d__Bacteria;p__Firmicutes;c__Bacilli;o__Staphylococcales	Staphylococcales	111985	0	397194	0	0	4319	4358	0	0	0	0	0	0	0	0	0	0	0	0	0	0	0	0	0	0	26650	12374	0	0	0	3438	3020	0	0	0	0	0	0	0	0	9068	0	0	0	0	0	0
	d__Bacteria;p__Synergistota;c__Synergistia;o__Synergistales	Synergistales	0	0	0	0	0	0	0	0	0	0	0	0	0	0	4240	0	0	0	0	0	0	0	0	0	0	0	0	0	0	0	0	0	0	0	0	0	0	0	0	42317	0	29313	0	0	1968	0	0
	d__Bacteria;p__Firmicutes_A;c__Clostridia;o__TANB77	TANB77	0	0	0	0	0	0	968	0	0	0	47576	0	0	35411	0	0	0	0	33057	32169	0	156120	0	0	0	0	0	0	0	0	0	0	0	0	0	0	0	15286	0	0	0	618767	0	0	0	0	2484
	d__Bacteria;p__Firmicutes_A;c__Clostridia;o__Tissierellales	Tissierellales	0	0	0	0	0	301605	0	0	766	0	0	0	0	0	0	0	36	0	0	0	0	0	0	0	0	0	328	0	0	571	0	494	0	0	0	0	0	0	0	268	0	0	0	0	0	0	0
	d__Bacteria;p__Firmicutes_A;c__Clostridia;o__UBA1381	UBA1381	0	0	0	0	0	0	0	0	0	0	1382	0	0	4792	0	0	0	0	7925	7265	0	836	0	0	0	0	0	0	0	0	0	0	0	0	0	73356	0	0	0	0	0	92258	0	0	0	9980	163
	d__Bacteria;p__Firmicutes_C;c__Negativicutes;o__Veillonellales	Veillonellales	25300	2829650	285749	228876	1566	1977460	2111137	3364	522570	2041506	20966	444644	1470793	60298	148361	731562	462589	418424	165681	112283	382330	140307	195103	917405	0	2833	9074	1607727	0	3271555	622855	306324	298348	0	0	535215	361733	37354	301384	1171771	4248186	36730	1166793	5278014	2237687	140901	26565
	d__Bacteria;p__Verrucomicrobiota;c__Verrucomicrobiae;o__Verrucomicrobiales	Verrucomicrobiales	0	0	0	0	0	0	0	0	0	0	121337	0	14849	15525	0	0	747997	0	10693	229	0	321170	25525	7000	0	0	0	73675	0	326842	0	0	294784	0	0	179588	1432	154196	3835	808775	61762	44223	0	0	0	580923	8718
	f		elcho01	elcho02	elcho03	elcho04	elcho05	elcho06	elcho07	elcho08	elcho09	elcho10	elcho11	elcho12	elcho13	elcho14	elcho15	elcho16	elcho17	elcho18	elcho19	elcho20	elcho21	elcho22	elcho23	elcho24	elcho25	elcho26	elcho27	elcho28	elcho29	elcho30	elcho31	elcho32	elcho33	elcho34	elcho35	elcho36	elcho37	elcho38	elcho39	elcho40	elcho41	elcho42	elcho43	elcho44	elcho45	elcho46	elcho47
	d__Bacteria;p__Firmicutes_C;c__Negativicutes;o__Acidaminococcales;f__Acidaminococcaceae	Acidaminococcaceae	0	0	0	10883	0	0	0	0	0	43817	199804	0	13633	129936	117289	380720	101060	4187	80965	0	3326	0	3710	10145	0	0	0	0	0	7748	284664	10122	75294	1818	0	7744	7126	0	0	217474	38954	286	4275	0	130794	0	0
	d__Bacteria;p__Actinobacteriota;c__Actinomycetia;o__Actinomycetales;f__Actinomycetaceae	Actinomycetaceae	74951	56	12416	0	41811	10325	1995	0	948	3262	0	1819	0	0	623	2627	0	0	0	0	0	0	0	0	0	8723	64583	126	1418	7298	0	276	1117	0	0	0	438	0	0	0	1261	0	0	6807	0	0	0
	d__Bacteria;p__Firmicutes_A;c__Clostridia;o__Oscillospirales;f__Acutalibacteraceae	Acutalibacteraceae	0	0	0	0	0	0	0	0	0	0	32302	0	250252	525370	187565	19362	0	533368	78426	135760	431564	495786	476157	0	0	0	0	0	0	0	0	0	0	0	0	0	0	211108	617043	0	9247	799101	0	0	0	37791	33649
	d__Bacteria;p__Firmicutes;c__Bacilli;o__Lactobacillales;f__Aerococcaceae	Aerococcaceae	671	2663	0	0	0	0	452	0	0	0	0	0	0	0	0	0	0	0	0	0	0	0	0	0	0	0	2092	0	0	0	0	0	0	0	0	0	0	0	0	0	0	0	0	0	0	0	0
	d__Bacteria;p__Verrucomicrobiota;c__Verrucomicrobiae;o__Verrucomicrobiales;f__Akkermansiaceae	Akkermansiaceae	0	0	0	0	0	0	0	0	0	0	121337	0	14849	15525	0	0	747997	0	10693	229	0	321170	25525	7000	0	0	0	73675	0	326842	0	0	294784	0	0	179588	1432	154196	3835	808775	61762	44223	0	0	0	580923	8718
	d__Bacteria;p__Firmicutes_A;c__Clostridia;o__Lachnospirales;f__Anaerotignaceae	Anaerotignaceae	0	0	0	0	0	0	0	0	0	0	12813	0	0	20038	7803	0	35774	0	9166	4890	20260	55	14889	0	0	0	0	0	0	0	0	0	0	0	0	0	0	18355	20948	0	0	28429	0	0	0	3031	916
	d__Bacteria;p__Firmicutes_A;c__Clostridia;o__Peptostreptococcales;f__Anaerovoracaceae	Anaerovoracaceae	0	0	0	0	0	0	0	0	0	182	50745	0	2337	19801	51644	9463	0	24875	7201	139	3765	27772	0	0	0	0	0	0	0	0	6266	0	0	0	0	0	1177	9501	308	1867	0	3383	191	0	0	1068	322
	d__Bacteria;p__Actinobacteriota;c__Coriobacteriia;o__Coriobacteriales;f__Atopobiaceae	Atopobiaceae	4177	1407586	103862	0	822	32556	706	0	4400759	988655	0	32672	521775	380	697635	1544439	271734	313211	0	3511	300262	4128	131897	1002443	729	7168	23057	429768	1143467	0	1205	733	102	0	2509	146477	8404	9386	0	89040	438325	0	58871	4606	1188	0	0
	d__Bacteria;p__Bacteroidota;c__Bacteroidia;o__Bacteroidales;f__Bacteroidaceae	Bacteroidaceae	0	2715341	9184	2295256	5729	0	0	9522619	2507	5914	8677348	165276	4377778	4961302	2549480	8574	5405403	5070838	1120049	9074432	2314869	3938662	4444101	6475443	0	0	6241	0	0	201842	7624621	67431	1647	4018707	433896	5255252	4591824	9935267	7224342	6066235	1158318	4149885	9138655	855	71854	3360360	3506268
	d__Bacteria;p__Bacteroidota;c__Bacteroidia;o__Bacteroidales;f__Barnesiellaceae	Barnesiellaceae	0	0	0	0	0	0	0	0	0	0	0	0	0	146053	419698	0	0	0	0	0	0	140835	0	0	0	0	0	0	0	0	0	0	0	9795	0	0	0	0	0	0	0	0	0	0	0	0	0
	d__Bacteria;p__Actinobacteriota;c__Actinomycetia;o__Actinomycetales;f__Bifidobacteriaceae	Bifidobacteriaceae	6052346	1867809	3067858	1929921	10287051	3536245	4139465	1811825	3841793	6063228	12208	896587	806934	1268	1825124	3831151	442455	1574720	18500	51049	1288607	73409	113897	2133704	41946	7342819	7749372	6189516	7560173	3167809	1747299	2104131	1553424	114967	8102855	240861	4609729	403879	362678	357098	4576383	75559	482958	1738563	1240858	1213397	501783
	d__Bacteria;p__Firmicutes_A;c__Clostridia;o__Christensenellales;f__Borkfalkiaceae	Borkfalkiaceae	0	0	0	0	0	0	0	0	0	0	13079	0	0	91173	0	0	0	0	0	0	95	1594	0	0	0	0	0	0	0	0	0	0	0	0	0	0	0	0	0	0	0	0	0	0	0	0	0
	d__Bacteria;p__Proteobacteria;c__Gammaproteobacteria;o__Burkholderiales;f__Burkholderiaceae	Burkholderiaceae	0	72581	0	10819	0	4174109	0	48303	142205	84610	11516	67541	17272	7150	4104	361907	50550	17427	7338	2267	13183	971	10222	160475	0	0	0	3018	0	2617	143933	149227	101477	0	0	899803	68387	24552	13016	457819	77151	52934	1666	18354	653886	2685	1083
	d__Bacteria;p__Firmicutes_A;c__Clostridia;o__Oscillospirales;f__Butyricicoccaceae	Butyricicoccaceae	0	1722	0	0	0	0	0	0	0	0	4552	0	31926	18340	1933	0	1697	10830	2956	3468	457	1475	29505	0	0	0	0	0	0	0	0	0	0	0	0	13143	44597	7257	25930	0	1132	27110	1241	0	0	40253	5216
	d__Bacteria;p__Proteobacteria;c__Alphaproteobacteria;o__RF32;f__CAG-239	CAG-239	0	0	0	0	0	0	0	0	0	0	0	0	0	0	0	0	0	0	0	0	0	0	0	0	0	0	0	0	0	0	0	0	0	0	0	0	0	0	0	0	0	0	0	0	0	152	0
	d__Bacteria;p__Firmicutes_A;c__Clostridia;o__Oscillospirales;f__CAG-272	CAG-272	0	0	0	0	0	0	0	0	0	0	0	0	0	42236	0	0	0	0	0	0	0	2162	0	0	0	0	0	0	0	0	0	0	0	0	0	0	0	0	0	0	0	9736	0	0	0	0	0
	d__Bacteria;p__Firmicutes_A;c__Clostridia;o__Lachnospirales;f__CAG-274	CAG-274	158549	0	0	0	4753	6013	0	0	0	0	0	0	0	0	0	4320	0	0	0	0	0	0	0	0	0	29320	0	0	0	0	0	0	3969	0	0	0	1400	0	0	0	0	0	0	0	0	0	0
	d__Bacteria;p__Firmicutes;c__Bacilli;o__RFN20;f__CAG-449	CAG-449	0	0	0	0	0	0	0	0	0	0	1707	0	0	5237	0	0	0	0	2692	0	0	562	0	0	0	0	0	0	0	0	0	0	0	0	0	0	0	0	0	0	0	0	0	0	0	0	0
	d__Bacteria;p__Firmicutes_A;c__Clostridia;o__TANB77;f__CAG-508	CAG-508	0	0	0	0	0	0	968	0	0	0	0	0	0	35411	0	0	0	0	33057	32169	0	156120	0	0	0	0	0	0	0	0	0	0	0	0	0	0	0	15286	0	0	0	618767	0	0	0	0	2484
	d__Bacteria;p__Firmicutes_A;c__Clostridia;o__Christensenellales;f__CAG-74	CAG-74	0	0	0	0	0	0	0	0	0	0	3889	0	0	7105	0	0	0	0	958	0	0	3084	0	0	0	0	0	0	0	0	0	0	0	0	0	0	0	0	0	0	0	0	0	0	0	0	949
	d__Bacteria;p__Campylobacterota;c__Campylobacteria;o__Campylobacterales;f__Campylobacteraceae	Campylobacteraceae	0	214	263	0	0	7586	0	0	0	0	210338	0	0	25779	0	0	0	0	0	0	8727	0	0	0	0	0	0	0	0	0	257	0	0	0	0	0	0	0	0	0	0	0	0	0	0	0	0
	d__Bacteria;p__Firmicutes_A;c__Clostridia;o__Lachnospirales;f__Cellulosilyticaceae	Cellulosilyticaceae	0	0	0	0	0	0	0	0	0	0	0	0	0	0	0	0	0	0	0	0	0	0	0	0	0	0	0	0	0	0	0	0	0	0	0	0	0	0	0	0	0	0	0	0	0	0	0
	d__Bacteria;p__Firmicutes_A;c__Clostridia;o__Christensenellales;f__Christensenellaceae	Christensenellaceae	0	0	0	0	0	0	0	0	0	114	0	0	0	0	630	0	0	114	0	0	0	1276	0	0	0	0	0	0	0	0	0	0	0	0	0	0	0	2312	0	0	0	450	0	0	3521	2509	583
	d__Bacteria;p__Firmicutes_A;c__Clostridia;o__Clostridiales;f__Clostridiaceae	Clostridiaceae	137309	0	0	48428	0	224891	14534	22003	110661	54382	0	0	1797	20558	0	6719	0	0	0	333	0	6140	70990	0	6642453	0	0	0	0	42129	0	4050	38152	0	0	0	0	0	0	0	0	0	1420	0	540	3125	0
	d__Bacteria;p__Firmicutes;c__Bacilli;o__Erysipelotrichales;f__Coprobacillaceae	Coprobacillaceae	0	15746	0	9941	0	0	0	0	0	31346	71593	0	23440	133592	8471	14916	21321	58852	713	7097	1631	0	10070	13070	0	0	0	0	0	31437	33629	0	4550	0	0	4326	36873	37147	9616	0	27090	24526	47393	8248	10439	7803	12540
	d__Bacteria;p__Bacteroidota;c__Bacteroidia;o__Bacteroidales;f__Coprobacteraceae	Coprobacteraceae	0	0	0	0	0	0	0	0	0	0	0	0	0	0	0	0	0	0	0	0	0	0	0	0	0	0	0	0	0	0	0	0	0	0	0	0	0	0	0	0	0	0	0	0	0	0	0
	d__Bacteria;p__Actinobacteriota;c__Coriobacteriia;o__Coriobacteriales;f__Coriobacteriaceae	Coriobacteriaceae	0	86610	0	13804	0	74775	10530	0	26939	8	15742	1233	52529	4932	47017	595272	67136	508908	3224	14427	102494	7416	71652	0	0	0	0	0	0	421139	63285	0	111095	0	16941	0	120385	86000	111500	34604	26058	9731	36385	0	0	111384	20422
	d__Bacteria;p__Desulfobacterota_I;c__Desulfovibrionia;o__Desulfovibrionales;f__Desulfovibrionaceae	Desulfovibrionaceae	0	0	0	0	0	0	0	0	0	2365	19156	0	0	27729	9028	15293	50578	6338	3167	20688	33916	92212	8242	24719	0	0	0	0	0	0	32431	0	0	0	0	0	29395	0	7265	25948	0	16798	0	0	1083	3273	340
	d__Bacteria;p__Synergistota;c__Synergistia;o__Synergistales;f__Dethiosulfovibrionaceae	Dethiosulfovibrionaceae	0	0	0	0	0	0	0	0	0	0	0	0	0	0	4240	0	0	0	0	0	0	0	0	0	0	0	0	0	0	0	0	0	0	0	0	0	0	0	0	42317	0	29313	0	0	1968	0	0
	d__Bacteria;p__Firmicutes_C;c__Negativicutes;o__Veillonellales;f__Dialisteraceae	Dialisteraceae	0	120664	0	26532	0	0	1442	0	7299	8537	0	3180	111659	58180	13423	31141	29961	168756	164393	49102	122911	105784	97997	0	0	0	0	7086	0	203293	31853	30479	23633	0	0	53298	0	37354	277601	175879	380738	30994	125120	296	23888	2217	13323
	d__Bacteria;p__Bacteroidota;c__Bacteroidia;o__Bacteroidales;f__Dysgonomonadaceae	Dysgonomonadaceae	0	0	0	0	0	0	0	0	0	0	0	0	0	0	86	0	42007	0	0	74	0	48	0	0	0	0	0	0	0	0	0	0	0	0	0	0	0	142	0	0	0	0	0	0	0	24	0
	d__Bacteria;p__Actinobacteriota;c__Coriobacteriia;o__Coriobacteriales;f__Eggerthellaceae	Eggerthellaceae	0	24647	0	12508	17135	0	0	3643	191911	53766	0	2072	11300	1365	29700	42441	47584	3223	0	0	2665	7425	6788	28856	0	0	0	13445	0	36638	16599	1441	7102	0	0	7674	58460	6538	7567	0	38936	1958	19781	0	26232	6244	8681
	d__Bacteria;p__Proteobacteria;c__Gammaproteobacteria;o__Enterobacterales;f__Enterobacteriaceae	Enterobacteriaceae	2174712	982036	698941	139515	591025	687060	1308172	204813	1976045	487936	0	301769	649337	0	5520	816392	527194	315099	16999	102371	1523	50803	992	222047	1201055	11215	1478904	1167273	2786688	171860	1824232	1509089	2280384	3240828	119208	357726	190252	40836	101811	988163	74184	9158	12816	2137698	134151	128247	770
	d__Bacteria;p__Firmicutes;c__Bacilli;o__Lactobacillales;f__Enterococcaceae	Enterococcaceae	0	9581	0	8685	182511	60099	0	0	70663	109312	0	0	512	0	0	27017	0	0	0	0	0	0	0	179683	0	0	17247	2204	246000	9719	54651	22673	12751	929	0	0	28083	0	0	0	0	0	0	5755	14717	0	0
	d__Bacteria;p__Firmicutes;c__Bacilli;o__Erysipelotrichales;f__Erysipelotrichaceae	Erysipelotrichaceae	0	0	0	64497	0	0	0	0	0	0	87931	0	0	85630	3444	0	11089	4483	5242	51676	35098	93919	32186	17708	0	0	0	0	0	18992	0	0	0	0	0	0	32778	71774	180	6547	33682	0	13119	136005	43510	20734	680
	d__Bacteria;p__Firmicutes_A;c__Clostridia;o__Eubacteriales;f__Eubacteriaceae	Eubacteriaceae	0	0	0	41054	0	0	0	88238	0	0	0	0	0	0	1040	15	0	0	0	0	0	0	5719	0	0	0	0	0	0	182	1967	0	0	0	0	0	7706	0	0	1005	0	0	0	0	0	0	0
	d__Bacteria;p__Fusobacteriota;c__Fusobacteriia;o__Fusobacteriales;f__Fusobacteriaceae	Fusobacteriaceae	0	0	3668	0	0	468	0	0	0	0	0	0	0	0	236	1117	1335	0	0	0	0	0	0	0	0	0	0	9874	0	0	2983	9893	0	0	0	0	0	0	0	3289	57	0	0	11229	16292	750	0
	d__Bacteria;p__Cyanobacteria;c__Vampirovibrionia;o__Gastranaerophilales;f__Gastranaerophilaceae	Gastranaerophilaceae	0	0	0	0	0	0	0	0	0	0	96703	0	0	195687	0	0	0	0	0	0	67793	8759	0	0	0	0	0	0	0	0	0	0	0	0	0	0	0	36946	0	0	0	0	0	0	0	0	0
	d__Bacteria;p__Firmicutes;c__Bacilli;o__Staphylococcales;f__Gemellaceae	Gemellaceae	16768	0	22408	0	0	0	594	0	0	0	0	0	0	0	0	0	0	0	0	0	0	0	0	0	0	0	1476	0	0	0	0	0	0	0	0	0	0	0	0	0	0	0	0	0	0	0	0
	d__Bacteria;p__Firmicutes_A;c__Clostridia;o__Lachnospirales;f__Lachnospiraceae	Lachnospiraceae	0	248145	0	304924	0	0	0	26708	114139	355958	1044434	44780	1020026	1265180	288276	898983	323992	320623	1115777	690894	205740	1376909	3474531	187415	3776553	0	0	0	0	831671	161866	0	176897	0	0	3108613	612790	653674	826448	112013	98718	1561754	273135	411768	521193	1323503	1316637
	d__Bacteria;p__Firmicutes;c__Bacilli;o__Lactobacillales;f__Lactobacillaceae	Lactobacillaceae	0	94732	194566	56933	0	173927	380177	1182	149549	283950	0	754307	209914	21	0	0	3559	578	0	0	1649	1231	0	19345	0	171701	10263	5440	0	11804	0	2534979	6482	0	27104	0	0	0	658	0	0	0	84	17969	936064	0	0
	d__Bacteria;p__Bacteroidota;c__Bacteroidia;o__Bacteroidales;f__Marinifilaceae	Marinifilaceae	0	7558	0	0	0	0	0	0	0	0	48365	0	118505	119998	438683	0	0	140038	2784	0	1786	571672	14446	0	0	0	0	0	0	0	0	0	0	0	0	0	0	0	0	1967673	0	0	6395	0	0	26356	53480
	d__Bacteria;p__Firmicutes_C;c__Negativicutes;o__Veillonellales;f__Megasphaeraceae	Megasphaeraceae	0	2401581	0	202344	0	863978	0	3364	421043	1814136	0	17132	1357675	0	134938	688213	432628	249515	0	48551	245332	2069	21396	917405	0	0	0	1600641	0	3068262	456475	102719	272446	0	0	373388	357690	0	14209	896319	3673904	1535	1029400	5113097	1976289	134806	13242
	d__Bacteria;p__Actinobacteriota;c__Actinomycetia;o__Actinomycetales;f__Micrococcaceae	Micrococcaceae	289045	17012	688677	0	40532	155	30484	1285	0	299	0	6289	0	0	0	0	0	0	0	0	0	0	0	0	39051	57480	196319	9782	1095	0	0	16077	14124	1697	146	0	0	0	0	0	15228	0	0	41023	896	0	0
	d__Bacteria;p__Bacteroidota;c__Bacteroidia;o__Bacteroidales;f__Muribaculaceae	Muribaculaceae	0	28141	0	0	0	0	0	0	0	0	382076	0	143645	0	0	0	0	380279	0	0	15999	0	0	0	0	0	0	0	0	0	0	0	0	0	0	0	0	0	0	0	0	0	43401	0	0	0	0
	d__Bacteria;p__Actinobacteriota;c__Actinomycetia;o__Mycobacteriales;f__Mycobacteriaceae	Mycobacteriaceae	0	0	0	0	0	829	0	0	0	0	0	0	0	0	0	938	0	0	0	0	0	0	0	0	0	0	659	0	0	0	0	0	0	0	0	0	0	0	0	0	0	0	0	0	0	0	0
	d__Bacteria;p__Patescibacteria;c__Saccharimonadia;o__Saccharimonadales;f__Nanogingivalaceae	Nanogingivalaceae	11914	614	4012	0	17863	0	8142	0	0	0	0	0	0	0	0	124	0	0	0	0	0	0	0	0	0	0	79605	0	0	0	0	2310	2058	0	0	47	1014	0	0	0	0	0	0	0	0	0	0
	d__Bacteria;p__Patescibacteria;c__Saccharimonadia;o__Saccharimonadales;f__Nanosynbacteraceae	Nanosynbacteraceae	0	0	0	0	0	0	0	0	0	0	0	0	0	0	0	0	0	0	0	0	0	0	0	0	0	0	0	0	0	0	0	0	0	0	0	0	0	0	0	0	0	0	0	0	0	0	0
	d__Bacteria;p__Proteobacteria;c__Gammaproteobacteria;o__Burkholderiales;f__Neisseriaceae	Neisseriaceae	0	0	0	0	0	0	0	0	0	0	0	0	0	0	0	0	0	0	0	0	0	0	0	0	0	0	0	0	0	0	0	1040	0	0	0	0	0	0	0	0	0	0	0	508	0	0	0
	d__Bacteria;p__Firmicutes_A;c__Clostridia;o__Oscillospirales;f__Oscillospiraceae	Oscillospiraceae	0	23747	0	62490	0	0	0	0	0	61963	536578	0	8757	991833	298098	0	104776	156405	682221	42498	243442	1127196	57738	88102	174574	0	0	0	0	19142	0	0	93986	7632	0	0	118336	507878	96944	90598	0	888061	0	680	8239	214316	182200
	d__Bacteria;p__Bacteroidota;c__Bacteroidia;o__Bacteroidales;f__Paludibacteraceae	Paludibacteraceae	0	0	0	0	0	0	0	0	0	0	0	0	0	0	0	0	0	0	0	0	0	0	0	0	0	0	0	0	0	0	0	0	0	0	0	0	0	31	0	0	0	0	0	0	0	0	0
	d__Bacteria;p__Proteobacteria;c__Gammaproteobacteria;o__Enterobacterales;f__Pasteurellaceae	Pasteurellaceae	2576	103749	93189	0	45864	776	36974	0	0	0	3403	74418	1194	0	0	715	0	0	1189	11836	2166	3740	44221	0	0	77724	0	0	0	3322	2177	2201	32284	0	0	14348	0	0	1969	76321	31438	93	12796	7902	0	636	0
	d__Bacteria;p__Firmicutes_B;c__Peptococcia;o__Peptococcales;f__Peptococcaceae	Peptococcaceae	0	0	0	0	0	5056	0	0	0	0	0	0	0	0	0	0	0	0	0	0	0	0	0	0	0	0	0	0	0	0	0	0	0	0	0	0	0	0	0	0	0	152	86	0	0	0	0
	d__Bacteria;p__Firmicutes_A;c__Clostridia;o__Tissierellales;f__Peptoniphilaceae	Peptoniphilaceae	0	0	0	0	0	301605	0	0	766	0	0	0	0	0	0	0	36	0	0	0	0	0	0	0	0	0	328	0	0	571	0	494	0	0	0	0	0	0	0	268	0	0	0	0	0	0	0
	d__Bacteria;p__Firmicutes_A;c__Clostridia;o__Peptostreptococcales;f__Peptostreptococcaceae	Peptostreptococcaceae	0	0	0	1356	0	3514	110	481	4599	10484	0	0	869	0	0	10463	2408	0	0	0	0	10436	656	47800	7522	0	0	0	0	3563	0	0	16850	170	0	0	0	2720	0	0	0	0	459	0	0	23984	2519
	d__Bacteria;p__Bacteroidota;c__Bacteroidia;o__Bacteroidales;f__Porphyromonadaceae	Porphyromonadaceae	0	0	0	0	0	0	0	0	400	1409	0	0	0	0	974	0	0	0	0	0	0	38197	0	0	0	0	0	0	0	1695	5345	0	0	0	0	0	0	0	0	0	0	0	0	0	0	0	0
	d__Bacteria;p__Actinobacteriota;c__Actinomycetia;o__Propionibacteriales;f__Propionibacteriaceae	Propionibacteriaceae	0	0	0	0	0	0	0	0	0	0	0	0	0	0	0	0	0	0	0	0	0	0	0	0	0	0	0	0	0	0	0	0	0	0	0	0	0	0	0	0	0	0	0	0	0	0	0
	d__Bacteria;p__Actinobacteriota;c__Coriobacteriia;o__Coriobacteriales;f__QAMH01	QAMH01	0	64	0	0	0	0	0	0	428	74	0	0	56	0	9	292	89	56	0	0	18	0	0	64	0	0	0	0	0	0	0	0	0	0	0	0	0	0	0	0	73	0	0	0	0	0	0
	d__Bacteria;p__Bacteroidota;c__Bacteroidia;o__Bacteroidales;f__Rikenellaceae	Rikenellaceae	0	842	0	1451	0	0	0	0	0	0	13061	0	151400	97606	537408	0	63387	431093	53934	2416156	0	870609	97507	0	0	0	0	0	0	3235	2002	0	0	0	0	0	23273	780847	15744	0	0	13986	3445	0	0	2054711	6750609
	d__Bacteria;p__Firmicutes_A;c__Clostridia;o__Oscillospirales;f__Ruminococcaceae	Ruminococcaceae	0	1216103	0	73853	0	0	0	0	0	0	543351	0	759814	413541	93186	2319188	244770	415347	392592	315704	346098	975067	1774148	212446	0	0	0	0	0	10326	0	0	0	92875	0	324153	726897	876907	459704	15614	89420	968931	121384	615473	4821736	1434722	267638
	d__Bacteria;p__Firmicutes_C;c__Negativicutes;o__Selenomonadales;f__Selenomonadaceae	Selenomonadaceae	0	0	0	109	0	0	0	0	0	0	0	0	0	7211	1308	0	28431	2891	0	12546	7596	0	7855	0	0	0	0	0	0	0	0	0	0	0	0	0	0	21409	135986	148233	61642	0	2386	0	0	0	0
	d__Bacteria;p__Firmicutes;c__Bacilli;o__Staphylococcales;f__Staphylococcaceae	Staphylococcaceae	95217	0	374786	0	0	4319	3764	0	0	0	0	0	0	0	0	0	0	0	0	0	0	0	0	0	0	26650	10898	0	0	0	3438	3020	0	0	0	0	0	0	0	0	9068	0	0	0	0	0	0
	d__Bacteria;p__Firmicutes;c__Bacilli;o__Lactobacillales;f__Streptococcaceae	Streptococcaceae	617627	253438	4017970	13386	161638	254950	1112457	31685	266034	58614	579	318794	52728	17464	21568	201566	9285	28306	991	1557	9765	14857	34517	40249	266255	109643	946774	102333	89625	76715	19577	1053054	100270	11996	50691	53937	17685	56812	9853	1042	189523	25	30067	1284609	116532	2434	0
	d__Bacteria;p__Proteobacteria;c__Gammaproteobacteria;o__Enterobacterales;f__Succinivibrionaceae	Succinivibrionaceae	0	0	0	0	0	0	0	0	0	0	0	0	0	5982	0	0	0	0	0	0	0	125348	0	0	0	0	0	0	0	0	0	0	0	0	0	0	0	2289	0	0	0	0	356	0	0	0	0
	d__Bacteria;p__Bacteroidota;c__Bacteroidia;o__Bacteroidales;f__Tannerellaceae	Tannerellaceae	0	199090	0	0	0	0	0	0	0	0	61805	0	168207	98214	83766	0	0	51847	31675	316091	38928	613351	85354	12	0	0	0	0	0	0	0	0	0	3572177	40016	0	0	267076	26433	10353	733	518736	2100	0	0	1443	1197
	d__Bacteria;p__Firmicutes;c__Bacilli;o__Haloplasmatales_A;f__Turicibacteraceae	Turicibacteraceae	0	0	0	0	0	0	0	0	0	0	0	0	0	0	0	0	0	0	0	0	0	0	0	0	0	0	0	0	0	0	0	0	0	0	0	0	0	0	0	0	0	0	0	0	0	0	0
	d__Bacteria;p__Firmicutes_A;c__Clostridia;o__UBA1381;f__UBA1381	UBA1381	0	0	0	0	0	0	0	0	0	0	1382	0	0	4792	0	0	0	0	7925	7265	0	836	0	0	0	0	0	0	0	0	0	0	0	0	0	73356	0	0	0	0	0	92258	0	0	0	9980	163
	d__Bacteria;p__Firmicutes;c__Bacilli;o__RF39;f__UBA660	UBA660	0	0	0	0	0	0	0	0	0	0	2803	0	0	164901	0	0	0	0	36573	0	18791	205783	6970	0	0	0	0	0	0	0	0	0	0	0	0	0	0	843	0	0	0	207262	0	0	0	0	1054
	d__Bacteria;p__Bacteroidota;c__Bacteroidia;o__Bacteroidales;f__UBA932	UBA932	0	3162	0	0	0	0	0	0	0	0	192817	0	0	1471521	4843958	0	0	626231	0	0	899109	124578	43936	0	0	0	0	0	0	0	0	0	0	0	0	0	0	0	0	0	9065	0	141252	0	0	0	0
	d__Bacteria;p__Actinobacteriota;c__Coriobacteriia;o__Coriobacteriales;f__UMGS124	UMGS124	0	55	0	0	0	0	0	0	167	0	0	0	0	0	974	27	0	136	0	0	0	0	0	0	0	0	0	0	0	0	0	0	0	0	0	0	0	0	0	0	82	0	0	0	0	0	0
	d__Bacteria;p__Firmicutes_C;c__Negativicutes;o__Veillonellales;f__Veillonellaceae	Veillonellaceae	25300	307405	285749	0	1566	1113482	2109695	0	94228	218833	20966	424332	1459	2118	0	12208	0	153	1288	14630	14087	32454	75710	0	0	2833	9074	0	0	0	134527	173126	2269	0	0	108529	4043	0	9574	99573	193544	4201	12273	164621	237510	3878	0
	g		elcho01	elcho02	elcho03	elcho04	elcho05	elcho06	elcho07	elcho08	elcho09	elcho10	elcho11	elcho12	elcho13	elcho14	elcho15	elcho16	elcho17	elcho18	elcho19	elcho20	elcho21	elcho22	elcho23	elcho24	elcho25	elcho26	elcho27	elcho28	elcho29	elcho30	elcho31	elcho32	elcho33	elcho34	elcho35	elcho36	elcho37	elcho38	elcho39	elcho40	elcho41	elcho42	elcho43	elcho44	elcho45	elcho46	elcho47
	d__Bacteria;p__Proteobacteria;c__Gammaproteobacteria;o__Enterobacterales;f__Enterobacteriaceae;g__1-19	g__1-19_	627	0	0	0	0	140	0	0	208	0	0	0	0	0	0	80	0	0	0	0	0	0	0	0	0	0	0	0	1628	0	0	0	0	255	0	0	0	0	0	0	0	0	0	0	0	0	0
	d__Bacteria;p__Firmicutes_A;c__Clostridia;o__Lachnospirales;f__Lachnospiraceae;g__1XD42-69	1XD42-69	0	0	0	0	0	0	0	0	0	0	0	0	0	3202	0	0	0	0	0	0	0	0	1091	0	0	0	0	0	0	0	0	0	0	0	0	0	0	0	0	0	0	0	0	0	0	0	0
	d__Bacteria;p__Proteobacteria;c__Gammaproteobacteria;o__Enterobacterales;f__Enterobacteriaceae;g__Acerihabitans	Acerihabitans	0	0	0	0	0	0	0	0	0	0	0	0	0	0	0	0	0	0	0	0	0	0	0	0	0	0	0	0	40	0	0	0	0	0	0	0	0	0	0	0	0	0	0	0	0	0	0
	d__Bacteria;p__Firmicutes_A;c__Clostridia;o__Lachnospirales;f__Lachnospiraceae;g__Acetatifactor	Acetatifactor	0	0	0	0	0	0	0	0	0	0	142543	0	120878	92926	20429	0	0	10612	184683	116369	6487	273349	242474	0	0	0	0	0	0	0	0	0	0	0	0	0	0	29946	359	0	0	374866	0	0	0	211334	855150
	d__Bacteria;p__Firmicutes_C;c__Negativicutes;o__Acidaminococcales;f__Acidaminococcaceae;g__Acidaminococcus	Acidaminococcus	0	0	0	10883	0	0	0	0	0	43817	0	0	13633	0	117289	380720	101060	4187	0	0	467	0	0	0	0	0	0	0	0	7748	284664	10122	75294	0	0	7744	3295	0	0	198487	38883	286	4275	0	130794	0	0
	d__Bacteria;p__Proteobacteria;c__Gammaproteobacteria;o__Enterobacterales;f__Pasteurellaceae;g__Actinobacillus_C	Actinobacillus_C	0	0	0	0	0	0	0	0	0	0	0	0	0	0	0	0	0	0	0	0	0	0	0	0	0	0	0	0	0	0	0	0	0	0	0	0	0	0	0	0	0	0	0	0	0	0	0
	d__Bacteria;p__Actinobacteriota;c__Actinomycetia;o__Actinomycetales;f__Actinomycetaceae;g__Actinomyces	Actinomyces	0	56	0	0	0	0	0	0	0	0	0	0	0	0	0	0	0	0	0	0	0	0	0	0	0	0	0	0	0	2776	0	0	0	0	0	0	0	0	0	0	0	0	0	4563	0	0	0
	d__Bacteria;p__Actinobacteriota;c__Coriobacteriia;o__Coriobacteriales;f__Eggerthellaceae;g__Adlercreutzia	Adlercreutzia	0	0	0	0	0	0	0	0	0	0	0	0	0	0	0	0	0	0	0	0	0	0	0	0	0	0	0	0	0	0	0	0	0	0	0	0	0	0	0	0	0	0	0	0	0	0	0
	d__Bacteria;p__Actinobacteriota;c__Actinomycetia;o__Actinomycetales;f__Bifidobacteriaceae;g__Aeriscardovia	Aeriscardovia	420	287	17	130	222	219	116	35	186	542	0	0	70	0	300	287	44	322	0	0	297	0	0	123	0	312	296	302	197	201	71	97	53	0	45	0	211	17	0	0	710	0	43	184	44	44	17
	d__Bacteria;p__Firmicutes_A;c__Clostridia;o__Lachnospirales;f__Lachnospiraceae;g__Agathobacter	Agathobacter	0	0	0	1348	0	0	0	0	57573	0	188312	0	290414	221250	32496	113502	6659	33792	32780	146914	31814	76712	519340	0	0	0	0	0	0	14857	32	0	0	0	0	118045	0	19437	164433	736	0	16513	0	0	0	0	0
	d__Bacteria;p__Firmicutes_A;c__Clostridia;o__Oscillospirales;f__Butyricicoccaceae;g__Agathobaculum	Agathobaculum	0	1722	0	0	0	0	0	0	0	0	4445	0	31926	15058	1933	0	1697	10830	2956	3468	457	1173	29505	0	0	0	0	0	0	0	0	0	0	0	0	13143	44597	7257	25930	0	1132	23833	1241	0	0	39161	5216
	d__Bacteria;p__Proteobacteria;c__Gammaproteobacteria;o__Enterobacterales;f__Pasteurellaceae;g__Aggregatibacter	Aggregatibacter	0	0	0	0	0	0	0	0	0	0	0	0	0	0	0	0	0	0	0	0	0	0	0	0	0	0	0	0	0	0	0	0	0	0	0	0	0	0	0	2648	0	0	0	0	0	0	0
	d__Bacteria;p__Verrucomicrobiota;c__Verrucomicrobiae;o__Verrucomicrobiales;f__Akkermansiaceae;g__Akkermansia	Akkermansia	0	0	0	0	0	0	0	0	0	0	121337	0	14849	15525	0	0	747997	0	10693	229	0	321170	25525	7000	0	0	0	73675	0	326842	0	0	294784	0	0	179588	1432	154196	3835	808775	61762	44223	0	0	0	580923	8718
	d__Bacteria;p__Firmicutes_A;c__Clostridia;o__Peptostreptococcales;f__Anaerovoracaceae;g__Alangreenwoodia	Alangreenwoodia	0	0	0	0	0	0	0	0	0	0	6270	0	0	0	1404	0	0	7852	2267	0	0	10882	0	0	0	0	0	0	0	0	0	0	0	0	0	0	0	7489	0	0	0	0	0	0	0	545	0
	d__Bacteria;p__Bacteroidota;c__Bacteroidia;o__Bacteroidales;f__Rikenellaceae;g__Alistipes	Alistipes	0	842	0	1451	0	0	0	0	0	0	13061	0	151231	97606	537272	0	63387	294438	53934	2415949	0	870030	97507	0	0	0	0	0	0	0	0	0	0	0	0	0	23273	780192	15744	0	0	0	0	0	0	2054098	6749452
	d__Bacteria;p__Bacteroidota;c__Bacteroidia;o__Bacteroidales;f__Rikenellaceae;g__Alistipes_A	Alistipes_A	0	0	0	0	0	0	0	0	0	0	0	0	0	0	0	0	0	136111	0	0	0	0	0	0	0	0	0	0	0	0	2002	0	0	0	0	0	0	0	0	0	0	0	3445	0	0	0	0
	d__Bacteria;p__Firmicutes_C;c__Negativicutes;o__Veillonellales;f__Dialisteraceae;g__Allisonella	Allisonella	0	0	0	666	0	0	1127	0	6566	8054	0	0	353	0	241	5278	0	1837	0	0	2407	3435	0	0	0	0	0	7086	0	0	30677	30479	764	0	0	1688	0	0	9020	6030	28375	0	5022	0	12668	0	0
	d__Bacteria;p__Bacteroidota;c__Bacteroidia;o__Bacteroidales;f__Bacteroidaceae;g__Alloprevotella	Alloprevotella	0	0	0	0	0	0	0	0	0	0	114	0	193	217964	0	0	801	55751	0	114	9304	208	0	0	0	0	0	0	0	0	0	0	0	0	0	12908	0	144	16	49	1508	0	206939	0	0	170	16
	d__Bacteria;p__Actinobacteriota;c__Actinomycetia;o__Actinomycetales;f__Bifidobacteriaceae;g__Alloscardovia	Alloscardovia	1049	800	81	363	1723	882	890	146	868	1950	0	144	188	0	833	1323	162	793	0	0	601	0	0	471	0	723	1969	1138	1522	518	266	267	363	0	657	65	889	32	71	24	2538	0	191	499	406	280	216
	d__Bacteria;p__Firmicutes_A;c__Clostridia;o__Lachnospirales;f__Lachnospiraceae;g__AM51-8	AM51-8	0	0	0	0	0	0	0	0	0	0	12937	0	0	1367	0	0	0	0	3915	0	0	0	35	0	0	0	0	0	0	0	0	0	0	0	0	0	0	0	0	0	0	0	0	0	0	0	0
	d__Bacteria;p__Firmicutes;c__Bacilli;o__Erysipelotrichales;f__Erysipelotrichaceae;g__Amedibacterium	Amedibacterium	0	0	0	0	0	0	0	0	0	0	0	0	0	0	0	0	0	0	0	0	0	0	0	0	0	0	0	0	0	0	0	0	0	0	0	0	0	0	0	0	0	0	0	0	0	0	0
	d__Bacteria;p__Firmicutes_A;c__Clostridia;o__Lachnospirales;f__Lachnospiraceae;g__An181	An181	0	0	0	0	0	0	0	0	0	0	0	0	0	0	0	0	0	0	0	0	0	0	99	0	0	0	0	0	0	102	0	0	0	0	0	0	0	66	0	0	0	0	0	0	0	188	0
	d__Bacteria;p__Firmicutes_A;c__Clostridia;o__Oscillospirales;f__Oscillospiraceae;g__An92	An92	0	0	0	21	0	0	0	0	0	107	0	0	0	0	0	0	337	610	0	0	0	0	0	104	896	0	0	0	0	0	0	0	124	0	0	0	452	0	0	458	0	0	0	0	0	830	21
	d__Bacteria;p__Firmicutes_A;c__Clostridia;o__Lachnospirales;f__Lachnospiraceae;g__Anaerobutyricum	Anaerobutyricum	0	0	0	0	0	0	0	0	0	0	7142	0	4678	210	0	0	0	6020	1363	0	0	32096	0	0	0	0	0	0	0	0	0	0	0	0	0	0	0	16546	27365	0	0	9363	12906	0	0	26452	73172
	d__Bacteria;p__Firmicutes_A;c__Clostridia;o__Tissierellales;f__Peptoniphilaceae;g__Anaerococcus	Anaerococcus	0	0	0	0	0	6310	0	0	155	0	0	0	0	0	0	0	0	0	0	0	0	0	0	0	0	0	305	0	0	0	0	0	0	0	0	0	0	0	0	0	0	0	0	0	0	0	0
	d__Bacteria;p__Firmicutes_A;c__Clostridia;o__Oscillospirales;f__Ruminococcaceae;g__Anaerofilum	Anaerofilum	0	0	0	0	0	0	0	0	0	0	63	0	0	141	0	0	0	0	15	0	0	470	109	0	0	0	0	0	0	0	0	0	0	0	0	0	141	223	47	0	0	47	0	0	15	109	0
	d__Bacteria;p__Firmicutes_C;c__Negativicutes;o__Veillonellales;f__Megasphaeraceae;g__Anaeroglobus	Anaeroglobus	0	1804	0	26	0	863376	0	0	1483	2602	0	0	829	0	105	1002	0	78	0	0	0	0	0	79	0	0	0	7003	0	3740	175	0	26	0	0	10558	761	0	0	1751	3727	0	315	631	58998	0	0
	d__Bacteria;p__Firmicutes_A;c__Clostridia;o__Lachnospirales;f__Lachnospiraceae;g__Anaerostipes	Anaerostipes	0	2373	0	0	0	0	0	0	0	0	6041	0	23410	8468	43893	9217	1671	18715	1552	3479	2448	8426	80894	0	0	0	0	0	0	6697	0	0	0	0	0	164873	0	86544	52994	0	1459	12744	4505	49190	38062	81253	130351
	d__Bacteria;p__Firmicutes_A;c__Clostridia;o__Lachnospirales;f__Anaerotignaceae;g__Anaerotignum	Anaerotignum	0	0	0	0	0	0	0	0	0	0	12813	0	0	18643	7803	0	35774	0	3041	4890	20260	0	14889	0	0	0	0	0	0	0	0	0	0	0	0	0	0	18355	20948	0	0	28256	0	0	0	0	916
	d__Bacteria;p__Firmicutes_A;c__Clostridia;o__Oscillospirales;f__Ruminococcaceae;g__Anaerotruncus	Anaerotruncus	0	0	0	0	0	0	0	0	0	0	3238	0	0	170	2952	0	0	0	0	6320	0	3853	0	0	0	0	0	0	0	10326	0	0	0	0	0	0	0	0	0	0	0	44969	0	0	0	11703	7494
	d__Bacteria;p__Firmicutes_A;c__Clostridia;o__Oscillospirales;f__Ruminococcaceae;g__Angelakisella	Angelakisella	0	0	0	0	0	0	0	0	0	0	7754	0	0	0	0	0	86146	0	6807	0	0	0	0	0	0	0	0	0	0	0	0	0	0	0	0	0	0	51997	0	0	0	0	0	0	0	0	0
	d__Bacteria;p__Firmicutes_A;c__Clostridia;o__Peptostreptococcales;f__Peptostreptococcaceae;g__Asaccharospora	Asaccharospora	0	0	0	0	0	0	0	0	0	0	0	0	0	0	0	0	0	0	0	0	0	0	0	180	0	0	0	0	0	0	0	0	0	0	0	0	0	0	0	0	0	0	0	0	0	0	0
	d__Bacteria;p__Proteobacteria;c__Gammaproteobacteria;o__Enterobacterales;f__Enterobacteriaceae;g__ATCC-39006	ATCC-39006	0	0	0	0	0	0	0	0	0	0	0	0	0	0	0	0	0	0	0	0	0	0	0	0	0	0	0	0	0	0	0	0	0	0	0	0	0	0	0	0	0	0	0	0	0	0	0
	d__Bacteria;p__Proteobacteria;c__Gammaproteobacteria;o__Enterobacterales;f__Enterobacteriaceae;g__Atlantibacter	Atlantibacter	3899	1728	142	0	1226	607	910	0	5592	490	0	0	286	0	0	3842	468	0	0	0	0	0	0	349	2913	0	1590	938	11441	0	2639	1069	2560	4915	0	0	0	0	0	935	0	0	0	1629	0	0	0
	d__Bacteria;p__Proteobacteria;c__Gammaproteobacteria;o__Enterobacterales;f__Pasteurellaceae;g__Avibacterium	Avibacterium	0	139	20	0	0	0	0	0	0	0	0	20	0	0	0	0	0	0	0	0	0	0	0	0	0	0	0	0	0	0	0	0	0	0	0	0	0	0	0	101	0	0	0	0	0	0	0
	d__Bacteria;p__Firmicutes_A;c__Clostridia;o__Oscillospirales;f__Ruminococcaceae;g__Avimicrobium	Avimicrobium	0	0	0	0	0	0	0	0	0	0	0	0	0	0	0	0	0	0	0	0	0	0	0	0	0	0	0	0	0	0	0	0	0	0	0	0	0	4781	0	0	0	0	0	0	0	163	0
	d__Bacteria;p__Firmicutes_A;c__Clostridia;o__Oscillospirales;f__Oscillospiraceae;g__Avoscillospira	Avoscillospira	0	0	0	0	0	0	0	0	0	0	0	0	0	383	0	0	0	0	0	0	0	565	0	0	0	0	0	0	0	0	0	0	0	0	0	0	0	78	0	0	0	60	0	0	0	0	0
	d__Bacteria;p__Proteobacteria;c__Gammaproteobacteria;o__Enterobacterales;f__Enterobacteriaceae;g__B14	B14	0	0	0	0	0	0	0	0	294	0	0	0	0	0	0	28	0	0	0	0	0	0	0	0	14	0	0	0	0	0	0	0	0	98	0	0	0	0	0	0	0	0	0	0	0	0	0
	d__Bacteria;p__Bacteroidota;c__Bacteroidia;o__Bacteroidales;f__Bacteroidaceae;g__Bacteroides	Bacteroides	0	1606260	0	2295067	0	0	0	9521287	0	0	1401703	0	1963709	648217	1946662	0	5176292	955916	359605	2961268	0	1834564	1848906	5798025	0	0	0	0	0	0	7553352	0	0	305386	433896	5142399	4067178	4074047	1034040	3872764	111728	3872810	341	0	0	2270338	1853922
	d__Bacteria;p__Bacteroidota;c__Bacteroidia;o__Bacteroidales;f__Bacteroidaceae;g__Bacteroides_E	Bacteroides_E	0	0	0	0	0	0	0	0	0	0	0	0	0	0	0	0	0	0	0	0	0	21	0	77	0	0	0	0	0	0	0	0	0	0	0	0	0	210	0	130	0	0	0	0	0	0	0
	d__Bacteria;p__Bacteroidota;c__Bacteroidia;o__Bacteroidales;f__Bacteroidaceae;g__Bacteroides_G	Bacteroides_G	0	264	0	0	0	0	0	0	0	0	261	0	429	11	333	0	0	60	0	719	0	416	336	420	0	0	0	0	0	0	0	0	0	72	0	0	96	773	131	761	0	107	0	0	0	357	228
	d__Bacteria;p__Bacteroidota;c__Bacteroidia;o__Bacteroidales;f__Bacteroidaceae;g__Bacteroides_H	Bacteroides_H	0	846	0	155	0	0	0	13	0	0	1331	0	1617	252	1613	0	0	294	55	2771	0	1743	1115	3832	0	0	0	0	0	0	27	0	0	432	0	0	1276	2819	765	3975	0	327	0	0	0	1727	1286
	d__Bacteria;p__Firmicutes_A;c__Clostridia;o__Peptostreptococcales;f__Anaerovoracaceae;g__Baileyella	Baileyella	0	0	0	0	0	0	0	0	0	0	0	0	0	0	0	4432	0	0	0	0	0	0	0	0	0	0	0	0	0	0	6266	0	0	0	0	0	0	0	0	1777	0	0	0	0	0	0	0
	d__Bacteria;p__Bacteroidota;c__Bacteroidia;o__Bacteroidales;f__Tannerellaceae;g__Barb7	Barb7	0	166	0	0	0	0	0	0	0	0	88	0	126	38	368	0	0	97	0	369	0	858	97	0	0	0	0	0	0	0	0	0	0	2280	0	0	0	595	38	208	0	463	0	0	0	88	9
	d__Bacteria;p__Firmicutes_A;c__Clostridia;o__Lachnospirales;f__Lachnospiraceae;g__Bariatricus	Bariatricus	0	0	0	0	0	0	0	0	0	0	106201	0	303	14285	0	0	0	0	2806	2929	0	26190	2722	0	0	0	0	0	0	1477	0	0	0	0	0	0	0	39104	22823	0	0	8849	0	0	12856	0	0
	d__Bacteria;p__Bacteroidota;c__Bacteroidia;o__Bacteroidales;f__Barnesiellaceae;g__Barnesiella	Barnesiella	0	0	0	0	0	0	0	0	0	0	0	0	0	146053	419155	0	0	0	0	0	0	140762	0	0	0	0	0	0	0	0	0	0	0	9795	0	0	0	0	0	0	0	0	0	0	0	0	0
	d__Bacteria;p__Proteobacteria;c__Gammaproteobacteria;o__Enterobacterales;f__Pasteurellaceae;g__Basfia	Basfia	0	395	365	0	170	0	103	0	0	0	0	268	0	0	0	0	0	0	0	0	0	0	235	0	0	237	0	0	0	0	0	0	0	0	0	0	0	0	0	455	165	0	0	0	0	0	0
	d__Bacteria;p__Proteobacteria;c__Gammaproteobacteria;o__Enterobacterales;f__Pasteurellaceae;g__Basfia_A	Basfia_A	0	210	143	0	66	0	0	0	0	0	0	85	0	0	0	0	0	0	0	0	0	0	0	0	0	0	0	0	0	0	0	0	0	0	0	0	0	0	0	198	0	0	0	0	0	0	0
	d__Bacteria;p__Actinobacteriota;c__Coriobacteriia;o__Coriobacteriales;f__Eggerthellaceae;g__Berryella	Berryella	0	0	0	0	0	0	0	0	475	81	0	0	0	0	0	116	0	0	0	0	0	0	0	32	0	0	0	0	0	16	0	0	0	0	0	0	80	0	0	0	41	0	0	0	0	0	0
	d__Bacteria;p__Proteobacteria;c__Gammaproteobacteria;o__Enterobacterales;f__Pasteurellaceae;g__Bibersteinia	Bibersteinia	0	122	0	0	0	0	0	0	0	0	0	0	0	0	0	0	0	0	0	0	0	0	0	0	0	0	0	0	0	0	0	0	0	0	0	0	0	0	0	0	0	0	0	0	0	0	0
	d__Bacteria;p__Actinobacteriota;c__Actinomycetia;o__Actinomycetales;f__Bifidobacteriaceae;g__Bifidobacterium	Bifidobacterium	6041602	1859550	3066228	1925607	10273020	3526699	4128753	1811043	3834196	6043741	12208	893992	803745	1268	1815835	3816421	440752	1567224	18500	51049	1284374	73409	113738	2128118	41946	7333521	7731171	6177543	7547808	3163192	1743306	2100789	1550351	114967	8098677	240408	4600677	403508	361705	356217	4558183	75559	480269	1733161	1237594	1210814	499515
	d__Bacteria;p__Proteobacteria;c__Gammaproteobacteria;o__Enterobacterales;f__Enterobacteriaceae;g__BIGb0383	BIGb0383	299	0	0	0	0	64	0	0	259	0	0	0	0	0	0	85	0	0	0	0	0	0	0	0	150	0	0	0	1591	0	0	0	0	64	0	0	0	0	0	0	0	0	0	0	0	0	0
	d__Bacteria;p__Firmicutes_A;c__Clostridia;o__Lachnospirales;f__Lachnospiraceae;g__Bilifractor	Bilifractor	0	0	0	0	0	0	0	0	0	0	0	0	0	0	0	0	0	0	0	0	0	0	0	0	0	0	0	0	0	0	0	0	0	0	0	0	0	0	0	0	0	0	0	0	0	0	0
	d__Bacteria;p__Desulfobacterota_I;c__Desulfovibrionia;o__Desulfovibrionales;f__Desulfovibrionaceae;g__Bilophila	Bilophila	0	0	0	0	0	0	0	0	0	0	19156	0	0	8868	7032	0	0	6338	2815	20688	4031	19376	8242	24719	0	0	0	0	0	0	32431	0	0	0	0	0	29395	0	7265	0	0	0	0	0	0	3273	340
	d__Bacteria;p__Proteobacteria;c__Gammaproteobacteria;o__Enterobacterales;f__Enterobacteriaceae;g__Biostraticola	Biostraticola	47	0	0	0	0	0	0	0	77	0	0	0	0	0	0	31	0	0	0	0	0	0	0	0	0	0	0	0	329	0	0	0	0	61	0	0	0	0	0	0	0	0	0	0	0	0	0
	d__Bacteria;p__Proteobacteria;c__Gammaproteobacteria;o__Enterobacterales;f__Pasteurellaceae;g__Bisgaardia	Bisgaardia	0	0	0	0	0	0	0	0	0	0	0	0	0	0	0	0	0	0	0	0	0	0	0	0	0	0	0	0	0	0	0	0	0	0	0	0	0	0	0	0	0	0	0	0	0	0	0
	d__Bacteria;p__Firmicutes_A;c__Clostridia;o__Lachnospirales;f__Lachnospiraceae;g__Blautia	Blautia	0	0	0	1274	0	0	0	0	0	0	506	0	0	11336	0	0	0	0	0	0	0	0	32	0	0	0	0	0	0	0	0	0	0	0	0	0	0	0	1912	0	0	32	0	0	0	915	1686
	d__Bacteria;p__Firmicutes_A;c__Clostridia;o__Lachnospirales;f__Lachnospiraceae;g__Blautia_A	Blautia_A	0	99205	0	79788	0	0	0	0	0	114420	71802	0	102603	96538	87712	149662	116846	160832	47326	68065	32956	444840	52953	43729	0	0	0	0	0	275736	26250	0	0	0	0	73975	167236	96576	269809	0	3348	110146	158273	105148	92813	148724	104603
	d__Bacteria;p__Firmicutes;c__Bacilli;o__Erysipelotrichales;f__Erysipelotrichaceae;g__Bulleidia	Bulleidia	0	0	0	0	0	0	0	0	0	0	0	0	0	13879	1983	0	0	0	0	1239	1167	0	0	0	0	0	0	0	0	0	0	0	0	0	0	0	0	15351	0	0	0	0	0	0	0	0	0
	d__Bacteria;p__Proteobacteria;c__Gammaproteobacteria;o__Enterobacterales;f__Enterobacteriaceae;g__Buttiauxella	Buttiauxella	216	0	0	0	0	0	0	0	586	0	0	0	0	0	0	45	0	0	0	0	0	0	0	0	0	0	0	0	2023	0	0	0	0	162	0	0	0	0	0	0	0	0	0	0	0	0	0
	d__Bacteria;p__Firmicutes_A;c__Clostridia;o__Lachnospirales;f__Lachnospiraceae;g__Butyribacter	Butyribacter	0	0	0	0	0	0	0	0	0	0	0	0	0	0	0	0	0	0	0	0	0	0	0	0	0	0	0	0	0	0	0	0	0	0	0	0	0	0	0	0	0	1526	0	0	0	0	0
	d__Bacteria;p__Firmicutes_A;c__Clostridia;o__Oscillospirales;f__Butyricicoccaceae;g__Butyricicoccus	Butyricicoccus	0	0	0	0	0	0	0	0	0	0	0	0	0	67	0	0	0	0	0	0	0	0	0	0	0	0	0	0	0	0	0	0	0	0	0	0	0	0	0	0	0	0	0	0	0	494	0
	d__Bacteria;p__Bacteroidota;c__Bacteroidia;o__Bacteroidales;f__Marinifilaceae;g__Butyricimonas	Butyricimonas	0	0	0	0	0	0	0	0	0	0	0	0	0	3859	0	0	0	67353	0	0	95	10647	0	0	0	0	0	0	0	0	0	0	0	0	0	0	0	0	0	0	0	0	0	0	0	0	0
	d__Bacteria;p__Firmicutes_A;c__Clostridia;o__Lachnospirales;f__Lachnospiraceae;g__Butyrivibrio	Butyrivibrio	0	0	0	0	0	0	0	0	0	0	0	0	0	0	0	0	0	0	0	0	0	0	0	0	0	0	0	0	0	0	0	0	0	0	0	0	0	0	0	0	0	15	0	0	0	0	0
	d__Bacteria;p__Firmicutes_A;c__Clostridia;o__Lachnospirales;f__Lachnospiraceae;g__Butyrivibrio_A	Butyrivibrio_A	0	0	0	0	0	0	0	0	0	0	0	0	0	115468	0	0	0	0	0	0	0	60351	0	0	0	0	0	0	0	0	0	0	0	0	0	0	0	20879	37	0	0	0	0	0	0	0	0
	d__Bacteria;p__Actinobacteriota;c__Coriobacteriia;o__Coriobacteriales;f__Eggerthellaceae;g__CAAEEV01	CAAEEV01	0	0	0	0	0	0	0	0	471	0	0	0	0	0	0	0	0	0	0	0	0	0	0	0	0	0	0	0	0	0	0	0	0	0	0	0	0	0	0	0	0	0	0	0	0	0	0
	d__Bacteria;p__Bacteroidota;c__Bacteroidia;o__Bacteroidales;f__Barnesiellaceae;g__CABJAA01	CABJAA01	0	0	0	0	0	0	0	0	0	0	0	0	0	0	0	0	0	0	0	0	0	0	0	0	0	0	0	0	0	0	0	0	0	0	0	0	0	0	0	0	0	0	0	0	0	0	0
	d__Bacteria;p__Actinobacteriota;c__Coriobacteriia;o__Coriobacteriales;f__QAMH01;g__CACZQA01	CACZQA01	0	64	0	0	0	0	0	0	428	74	0	0	56	0	9	292	89	56	0	0	18	0	0	64	0	0	0	0	0	0	0	0	0	0	0	0	0	0	0	0	73	0	0	0	0	0	0
	d__Bacteria;p__Firmicutes_C;c__Negativicutes;o__Veillonellales;f__Megasphaeraceae;g__Caecibacter	Caecibacter	0	10917	0	84033	0	0	0	0	1395	123432	0	0	64848	0	73707	75023	8773	10299	0	0	6685	2069	21373	3695	0	0	0	5319	0	175172	55454	0	7973	0	0	1087	31022	0	10169	118716	40711	1535	12302	19970	20045	264	39
	d__Bacteria;p__Firmicutes_A;c__Clostridia;o__Oscillospirales;f__Oscillospiraceae;g__CAG-103	CAG-103	0	0	0	0	0	0	0	0	0	0	86842	0	0	33096	38056	0	0	0	472	0	0	1494	0	0	0	0	0	0	0	0	0	0	0	0	0	0	0	0	0	0	0	108401	0	0	0	0	568
	d__Bacteria;p__Firmicutes_A;c__Clostridia;o__Oscillospirales;f__Ruminococcaceae;g__CAG-115	CAG-115	0	0	0	0	0	0	0	0	0	0	3852	0	0	0	0	0	0	0	0	0	0	0	0	0	0	0	0	0	0	0	0	0	0	0	0	0	0	0	0	0	0	706	0	0	0	0	0
	d__Bacteria;p__Firmicutes_A;c__Clostridia;o__Lachnospirales;f__Lachnospiraceae;g__CAG-127	CAG-127	0	0	0	0	0	0	0	0	0	0	14982	0	0	66567	0	0	0	0	13234	0	1512	5097	0	0	0	0	0	0	0	0	0	0	0	0	0	0	0	0	0	0	0	0	0	0	0	0	0
	d__Bacteria;p__Firmicutes_A;c__Clostridia;o__Oscillospirales;f__Oscillospiraceae;g__CAG-170	CAG-170	0	0	0	0	0	0	0	0	0	0	3577	0	0	109890	153962	0	2787	0	4410	0	3335	125427	0	0	0	0	0	0	0	0	0	0	0	0	0	0	0	0	0	0	0	0	0	0	0	0	0
	d__Bacteria;p__Firmicutes_A;c__Clostridia;o__Oscillospirales;f__Acutalibacteraceae;g__CAG-177	CAG-177	0	0	0	0	0	0	0	0	0	0	0	0	0	0	166339	0	0	0	0	0	351909	20823	0	0	0	0	0	0	0	0	0	0	0	0	0	0	0	29021	0	0	0	0	0	0	0	0	0
	d__Bacteria;p__Firmicutes_A;c__Clostridia;o__Lachnospirales;f__Lachnospiraceae;g__CAG-194	CAG-194	0	0	0	0	0	0	0	0	0	0	0	0	0	12229	0	0	0	0	1944	0	0	0	0	0	0	0	0	0	0	0	0	0	0	0	0	0	0	0	0	0	0	9734	0	0	0	0	0
	d__Bacteria;p__Firmicutes_A;c__Clostridia;o__Oscillospirales;f__Acutalibacteraceae;g__CAG-217	CAG-217	0	0	0	0	0	0	0	0	0	0	0	0	0	0	0	0	0	0	0	0	0	1308	0	0	0	0	0	0	0	0	0	0	0	0	0	0	0	3098	0	0	0	0	0	0	0	0	4369
	d__Bacteria;p__Firmicutes_A;c__Clostridia;o__Peptostreptococcales;f__Anaerovoracaceae;g__CAG-238	CAG-238	0	0	0	0	0	0	0	0	0	0	44475	0	0	17632	21962	0	0	0	4934	0	1213	8758	0	0	0	0	0	0	0	0	0	0	0	0	0	0	0	0	0	0	0	3383	0	0	0	0	0
	d__Bacteria;p__Firmicutes_A;c__Clostridia;o__TANB77;f__CAG-508;g__CAG-245	CAG-245	0	0	0	0	0	0	0	0	0	0	0	0	0	0	0	0	0	0	22105	0	0	40287	0	0	0	0	0	0	0	0	0	0	0	0	0	0	0	2713	0	0	0	110	0	0	0	0	0
	d__Bacteria;p__Firmicutes_A;c__Clostridia;o__TANB77;f__CAG-508;g__CAG-269	CAG-269	0	0	0	0	0	0	0	0	0	0	0	0	0	23457	0	0	0	0	10639	32169	0	75712	0	0	0	0	0	0	0	0	0	0	0	0	0	0	0	73	0	0	0	37042	0	0	0	0	0
	d__Bacteria;p__Firmicutes_A;c__Clostridia;o__TANB77;f__CAG-508;g__CAG-273	CAG-273	0	0	0	0	0	0	0	0	0	0	0	0	0	0	0	0	0	0	313	0	0	56	0	0	0	0	0	0	0	0	0	0	0	0	0	0	0	1343	0	0	0	577781	0	0	0	0	0
	d__Bacteria;p__Firmicutes;c__Bacilli;o__RF39;f__UBA660;g__CAG-302	CAG-302	0	0	0	0	0	0	0	0	0	0	0	0	0	49317	0	0	0	0	10742	0	17883	150699	0	0	0	0	0	0	0	0	0	0	0	0	0	0	0	0	0	0	0	0	0	0	0	0	0
	d__Bacteria;p__Firmicutes_A;c__Clostridia;o__Lachnospirales;f__Lachnospiraceae;g__CAG-303	CAG-303	0	0	0	0	0	0	0	0	0	0	0	0	0	48	0	0	0	0	0	0	0	0	126	0	0	0	0	0	0	0	0	0	0	0	0	192	0	0	0	0	0	0	0	0	0	0	0
	d__Bacteria;p__Firmicutes_A;c__Clostridia;o__Lachnospirales;f__Lachnospiraceae;g__CAG-317	CAG-317	0	0	0	0	0	0	0	0	0	98	490	0	1679	862	0	3159	0	298	24	442	25	372	2105	0	0	0	0	0	0	353	586	0	434	0	0	0	817	641	444	0	0	410	248	223	0	2850	25
	d__Bacteria;p__Firmicutes_A;c__Clostridia;o__Oscillospirales;f__Ruminococcaceae;g__CAG-353	CAG-353	0	0	0	0	0	0	0	0	0	0	0	0	0	2940	0	0	0	0	8156	0	0	0	0	0	0	0	0	0	0	0	0	0	0	0	0	0	0	0	0	0	0	0	0	0	0	0	0
	d__Bacteria;p__Firmicutes_A;c__Clostridia;o__UBA1381;f__UBA1381;g__CAG-41	CAG-41	0	0	0	0	0	0	0	0	0	0	1382	0	0	1887	0	0	0	0	0	7265	0	836	0	0	0	0	0	0	0	0	0	0	0	0	0	73327	0	0	0	0	0	92258	0	0	0	9980	163
	d__Bacteria;p__Firmicutes;c__Bacilli;o__RFN20;f__CAG-449;g__CAG-449	CAG-449	0	0	0	0	0	0	0	0	0	0	1707	0	0	5237	0	0	0	0	2692	0	0	562	0	0	0	0	0	0	0	0	0	0	0	0	0	0	0	0	0	0	0	0	0	0	0	0	0
	d__Bacteria;p__Firmicutes_A;c__Clostridia;o__Lachnospirales;f__Lachnospiraceae;g__CAG-45	CAG-45	0	0	0	0	0	0	0	0	0	0	0	0	0	0	0	0	0	0	0	0	0	5745	1809	0	0	0	0	0	0	0	0	0	0	0	0	0	0	0	0	0	0	0	0	0	0	0	0
	d__Bacteria;p__Firmicutes_A;c__Clostridia;o__TANB77;f__CAG-508;g__CAG-492	CAG-492	0	0	0	0	0	0	0	0	0	0	0	0	0	0	0	0	0	0	0	0	0	26	0	0	0	0	0	0	0	0	0	0	0	0	0	0	0	0	0	0	0	328	0	0	0	0	0
	d__Bacteria;p__Firmicutes_A;c__Clostridia;o__Lachnospirales;f__Lachnospiraceae;g__CAG-510	CAG-510	0	0	0	0	0	0	0	0	0	0	934	0	0	0	0	0	0	0	679	0	0	434	670	0	0	0	0	0	0	0	0	0	0	0	0	0	0	0	0	0	0	1042	0	0	0	0	313
	d__Bacteria;p__Firmicutes_A;c__Clostridia;o__Lachnospirales;f__Lachnospiraceae;g__CAG-56	CAG-56	0	0	0	0	0	0	0	0	0	0	123	0	0	173	0	0	0	0	0	0	0	89	240	0	0	0	0	0	0	0	0	0	0	0	0	36	0	0	0	0	0	277	0	0	0	17	0
	d__Bacteria;p__Firmicutes_A;c__Clostridia;o__Lachnospirales;f__Lachnospiraceae;g__CAG-603	CAG-603	0	0	0	0	0	0	0	0	0	0	0	0	0	40648	0	0	0	0	0	0	0	0	133	0	0	0	0	0	0	0	0	0	0	0	0	18	0	0	0	0	0	0	0	0	0	0	0
	d__Bacteria;p__Firmicutes_A;c__Clostridia;o__Oscillospirales;f__Oscillospiraceae;g__CAG-83	CAG-83	0	0	0	0	0	0	0	0	0	0	175673	0	0	260094	81146	0	2692	0	487539	0	139270	390427	21911	0	0	0	0	0	0	0	0	0	0	0	0	0	0	353856	89873	0	0	625437	0	0	0	13318	0
	d__Bacteria;p__Firmicutes_A;c__Clostridia;o__Lachnospirales;f__Lachnospiraceae;g__CAG-882	CAG-882	0	0	0	0	0	0	0	0	0	0	731	0	0	9395	0	0	0	0	0	0	0	6364	0	0	0	0	0	0	0	0	0	0	0	0	0	0	0	0	0	0	0	0	0	0	0	0	0
	d__Bacteria;p__Firmicutes_A;c__Clostridia;o__Lachnospirales;f__Lachnospiraceae;g__CAG-95	CAG-95	0	0	0	0	0	0	0	0	0	0	1713	0	0	14192	0	0	0	0	14377	0	0	2346	299	0	0	0	0	0	0	0	0	0	0	0	0	0	0	0	0	0	0	20340	0	0	0	0	0
	d__Bacteria;p__Actinobacteriota;c__Coriobacteriia;o__Coriobacteriales;f__UMGS124;g__CAIFEU01	CAIFEU01	0	55	0	0	0	0	0	0	167	0	0	0	0	0	55	27	0	136	0	0	0	0	0	0	0	0	0	0	0	0	0	0	0	0	0	0	0	0	0	0	82	0	0	0	0	0	0
	d__Bacteria;p__Firmicutes_A;c__Clostridia;o__Oscillospirales;f__Oscillospiraceae;g__CAJFPI01	CAJFPI01	0	0	0	0	0	0	0	0	0	0	0	0	0	248	0	0	0	0	0	0	0	50	0	0	0	0	0	0	0	0	0	0	0	0	0	0	0	0	0	0	0	98	0	0	0	0	0
	d__Bacteria;p__Actinobacteriota;c__Coriobacteriia;o__Coriobacteriales;f__Eggerthellaceae;g__CAJFUR01	CAJFUR01	0	0	0	0	0	0	0	0	4665	810	0	0	0	0	0	573	283	0	0	0	0	0	0	441	0	0	0	0	0	606	0	0	0	0	0	0	1145	0	0	0	0	0	0	0	0	0	0
	d__Bacteria;p__Proteobacteria;c__Alphaproteobacteria;o__RF32;f__CAG-239;g__CAJLXD01	CAJLXD01	0	0	0	0	0	0	0	0	0	0	0	0	0	0	0	0	0	0	0	0	0	0	0	0	0	0	0	0	0	0	0	0	0	0	0	0	0	0	0	0	0	0	0	0	0	152	0
	d__Bacteria;p__Campylobacterota;c__Campylobacteria;o__Campylobacterales;f__Campylobacteraceae;g__Campylobacter	Campylobacter	0	0	0	0	0	0	0	0	0	0	210338	0	0	25779	0	0	0	0	0	0	8727	0	0	0	0	0	0	0	0	0	0	0	0	0	0	0	0	0	0	0	0	0	0	0	0	0	0
	d__Bacteria;p__Campylobacterota;c__Campylobacteria;o__Campylobacterales;f__Campylobacteraceae;g__Campylobacter_A	Campylobacter_A	0	214	263	0	0	7586	0	0	0	0	0	0	0	0	0	0	0	0	0	0	0	0	0	0	0	0	0	0	0	0	0	0	0	0	0	0	0	0	0	0	0	0	0	0	0	0	0
	d__Bacteria;p__Proteobacteria;c__Gammaproteobacteria;o__Enterobacterales;f__Pasteurellaceae;g__Canicola	Canicola	0	0	0	0	0	0	0	0	0	0	0	0	0	0	0	0	0	0	0	0	0	0	0	0	0	0	0	0	0	0	0	0	0	0	0	0	0	0	0	0	0	0	0	0	0	0	0
	d__Bacteria;p__Firmicutes_A;c__Clostridia;o__Lachnospirales;f__Lachnospiraceae;g__Catenibacillus	Catenibacillus	0	0	0	0	0	0	0	0	0	0	0	0	0	0	0	0	0	0	0	0	0	0	0	0	0	0	0	0	0	0	0	0	0	0	0	0	0	0	0	0	0	0	0	0	0	827	22
	d__Bacteria;p__Firmicutes;c__Bacilli;o__Erysipelotrichales;f__Coprobacillaceae;g__Catenibacterium	Catenibacterium	0	15021	0	0	0	0	0	0	0	0	71372	0	23440	125976	0	0	0	58618	0	7097	1631	0	10070	0	0	0	0	0	0	0	0	0	0	0	0	0	0	33293	0	0	27090	0	47211	0	0	0	0
	d__Bacteria;p__Proteobacteria;c__Gammaproteobacteria;o__Enterobacterales;f__Pasteurellaceae;g__Caviibacterium	Caviibacterium	0	0	0	0	0	0	0	0	0	0	0	0	0	0	0	0	0	0	0	0	0	0	0	0	0	0	0	0	0	0	0	0	0	0	0	0	0	0	0	0	0	0	0	0	0	0	0
	d__Bacteria;p__Firmicutes_A;c__Clostridia;o__Peptostreptococcales;f__Peptostreptococcaceae;g__CCUG-7971	CCUG-7971	0	0	0	0	0	0	0	0	0	0	0	0	0	0	0	0	0	0	0	0	0	0	0	151	0	0	0	0	0	0	0	0	0	0	0	0	0	0	0	0	0	0	0	0	0	0	0
	d__Bacteria;p__Proteobacteria;c__Gammaproteobacteria;o__Enterobacterales;f__Enterobacteriaceae;g__Cedecea	Cedecea	761	0	0	0	0	256	0	0	1140	0	0	0	0	0	0	500	0	0	0	0	0	0	0	0	620	0	0	0	3183	0	0	125	0	898	0	0	0	0	0	0	0	0	0	0	0	0	0
	d__Bacteria;p__Firmicutes_A;c__Clostridia;o__Lachnospirales;f__Lachnospiraceae;g__CHH4-2	CHH4-2	0	0	0	0	0	0	0	0	0	0	0	0	0	0	0	0	0	0	0	0	0	0	0	0	296	0	0	0	0	0	0	0	0	0	0	0	0	0	0	0	0	0	0	0	0	0	0
	d__Bacteria;p__Proteobacteria;c__Gammaproteobacteria;o__Enterobacterales;f__Enterobacteriaceae;g__Chimaeribacter	Chimaeribacter	0	0	0	0	0	0	0	0	0	0	0	0	0	0	0	0	0	0	0	0	0	0	0	0	0	0	0	0	0	0	0	0	0	0	0	0	0	0	0	0	0	0	0	0	0	0	0
	d__Bacteria;p__Firmicutes_A;c__Clostridia;o__Lachnospirales;f__Lachnospiraceae;g__Choladocola	Choladocola	0	0	0	0	0	0	0	0	0	0	11128	0	0	7331	0	0	0	159	5349	852	471	3093	4946	0	0	0	0	0	0	0	0	0	0	0	0	55	0	3162	4469	0	0	19885	0	0	0	5308	0
	d__Bacteria;p__Firmicutes_A;c__Clostridia;o__Lachnospirales;f__Lachnospiraceae;g__Choladousia	Choladousia	0	0	0	0	0	0	0	0	0	0	0	0	0	1213	0	0	0	0	0	0	0	0	0	0	0	0	0	0	0	0	0	0	0	0	0	0	0	0	0	0	0	146	0	0	0	0	0
	d__Bacteria;p__Firmicutes_A;c__Clostridia;o__Christensenellales;f__Christensenellaceae;g__Christensenella	Christensenella	0	0	0	0	0	0	0	0	0	114	0	0	0	0	630	0	0	114	0	0	0	1276	0	0	0	0	0	0	0	0	0	0	0	0	0	0	0	2312	0	0	0	0	0	0	3521	2509	583
	d__Bacteria;p__Proteobacteria;c__Gammaproteobacteria;o__Enterobacterales;f__Enterobacteriaceae;g__Citrobacter	Citrobacter	46	1829	788	0	630	0	1196	0	9836	413	0	45	501	0	0	2088	410	0	0	0	0	0	0	272	2141	0	1617	8803	53381	182	1736	2438	2518	4808	0	227	0	0	0	827	0	0	0	2597	0	0	0
	d__Bacteria;p__Proteobacteria;c__Gammaproteobacteria;o__Enterobacterales;f__Enterobacteriaceae;g__Citrobacter_A	Citrobacter_A	1825	4973	3260	82	4880	652	5413	1094	15427	2061	0	1310	2884	0	0	6227	2044	799	0	54	0	0	0	19853	10983	0	7476	5177	11059	1099	9067	8909	9943	22470	0	1297	724	0	0	6388	136	0	0	9599	500	376	0
	d__Bacteria;p__Proteobacteria;c__Gammaproteobacteria;o__Enterobacterales;f__Enterobacteriaceae;g__Citrobacter_B	Citrobacter_B	3903	15182	9050	898	9473	624	16864	1282	24136	5695	0	4427	8513	0	0	9044	6351	3007	0	1835	0	0	0	2840	19825	0	18811	15604	17965	2795	27189	21761	29037	41592	222	4507	2245	0	851	14909	681	0	0	30841	5519	1493	0
	d__Bacteria;p__Firmicutes_A;c__Clostridia;o__Peptostreptococcales;f__Peptostreptococcaceae;g__Clostridioides	Clostridioides	0	0	0	1356	0	0	0	0	0	0	0	0	0	0	0	0	0	0	0	0	0	0	0	47381	7522	0	0	0	0	0	0	0	15723	170	0	0	0	0	0	0	0	0	0	0	0	0	0
	d__Bacteria;p__Firmicutes_A;c__Clostridia;o__Clostridiales;f__Clostridiaceae;g__Clostridium	Clostridium	60497	0	0	48428	0	135481	14534	22003	52599	54382	0	0	1797	2905	0	6719	0	0	0	0	0	1803	62840	0	6608158	0	0	0	0	42129	0	0	38152	0	0	0	0	0	0	0	0	0	787	0	540	3125	0
	d__Bacteria;p__Firmicutes_A;c__Clostridia;o__Oscillospirales;f__Acutalibacteraceae;g__Clostridium_A	Clostridium_A	0	0	0	0	0	0	0	0	0	0	0	0	0	0	0	0	0	0	0	0	0	916	0	0	0	0	0	0	0	0	0	0	0	0	0	0	0	0	0	0	0	0	0	0	0	0	0
	d__Bacteria;p__Firmicutes_A;c__Clostridia;o__Clostridiales;f__Clostridiaceae;g__Clostridium_AH	Clostridium_AH	24	0	0	0	0	0	0	0	0	0	0	0	0	0	0	0	0	0	0	0	0	0	0	0	1124	0	0	0	0	0	0	0	0	0	0	0	0	0	0	0	0	0	0	0	0	0	0
	d__Bacteria;p__Firmicutes_A;c__Clostridia;o__Lachnospirales;f__Lachnospiraceae;g__Clostridium_AP	Clostridium_AP	0	0	0	0	0	0	0	0	0	0	0	0	0	0	0	0	5930	0	0	0	0	0	560	0	0	0	0	0	0	0	0	0	0	0	0	0	0	0	0	0	0	0	0	0	0	3317	16269
	d__Bacteria;p__Firmicutes;c__Bacilli;o__Erysipelotrichales;f__Erysipelotrichaceae;g__Clostridium_AQ	Clostridium_AQ	0	0	0	64497	0	0	0	0	0	0	0	0	0	0	1461	0	11089	0	0	0	0	1698	0	17708	0	0	0	0	0	18992	0	0	0	0	0	0	32778	0	180	0	0	0	0	0	0	19801	120
	d__Bacteria;p__Firmicutes_A;c__Clostridia;o__Clostridiales;f__Clostridiaceae;g__Clostridium_C	Clostridium_C	0	0	0	0	0	74	0	0	63	0	0	0	0	0	0	0	0	0	0	0	0	0	0	0	150	0	0	0	0	0	0	0	0	0	0	0	0	0	0	0	0	0	0	0	0	0	0
	d__Bacteria;p__Firmicutes_A;c__Clostridia;o__Oscillospirales;f__Acutalibacteraceae;g__Clostridium_E	Clostridium_E	0	0	0	0	0	0	0	0	0	0	0	0	0	0	0	0	0	0	0	0	0	0	0	0	0	0	0	0	0	0	0	0	0	0	0	0	0	0	0	0	0	0	0	0	0	0	0
	d__Bacteria;p__Firmicutes_A;c__Clostridia;o__Clostridiales;f__Clostridiaceae;g__Clostridium_F	Clostridium_F	0	0	0	0	0	81809	0	0	47470	0	0	0	0	0	0	0	0	0	0	0	0	0	0	0	176	0	0	0	0	0	0	0	0	0	0	0	0	0	0	0	0	0	0	0	0	0	0
	d__Bacteria;p__Firmicutes_A;c__Clostridia;o__Clostridiales;f__Clostridiaceae;g__Clostridium_P	Clostridium_P	76788	0	0	0	0	7527	0	0	10529	0	0	0	0	17653	0	0	0	0	0	333	0	4337	8150	0	25823	0	0	0	0	0	0	4050	0	0	0	0	0	0	0	0	0	0	633	0	0	0	0
	d__Bacteria;p__Firmicutes_A;c__Clostridia;o__Lachnospirales;f__Lachnospiraceae;g__Clostridium_Q	Clostridium_Q	0	0	0	0	0	0	0	0	0	0	830	0	8890	5166	135	0	0	0	4817	1241	0	2130	0	0	108	0	0	0	0	0	0	0	0	0	0	52440	0	950	6380	0	7046	45816	0	0	0	14680	1853
	d__Bacteria;p__Firmicutes_A;c__Clostridia;o__Lachnospirales;f__Lachnospiraceae;g__Clostridium_R	Clostridium_R	0	0	0	0	0	0	0	0	0	0	0	0	0	0	0	0	0	0	0	0	0	0	0	0	0	0	0	0	0	0	0	0	0	0	0	149	0	0	0	0	0	0	0	0	0	0	0
	d__Bacteria;p__Firmicutes_A;c__Clostridia;o__Clostridiales;f__Clostridiaceae;g__Clostridium_T	Clostridium_T	0	0	0	0	0	0	0	0	0	0	0	0	0	0	0	0	0	0	0	0	0	0	0	0	1841	0	0	0	0	0	0	0	0	0	0	0	0	0	0	0	0	0	0	0	0	0	0
	d__Bacteria;p__Firmicutes_A;c__Clostridia;o__Clostridiales;f__Clostridiaceae;g__Clostridium_X	Clostridium_X	0	0	0	0	0	0	0	0	0	0	0	0	0	0	0	0	0	0	0	0	0	0	0	0	1544	0	0	0	0	0	0	0	0	0	0	0	0	0	0	0	0	0	0	0	0	0	0
	d__Bacteria;p__Firmicutes_A;c__Clostridia;o__Lachnospirales;f__Lachnospiraceae;g__COE1	COE1	0	0	0	0	0	0	0	0	0	0	8658	0	0	9601	0	0	0	0	174496	0	0	2863	0	0	0	0	0	0	0	0	0	0	0	0	0	0	0	0	0	0	0	146549	0	0	0	0	0
	d__Bacteria;p__Actinobacteriota;c__Coriobacteriia;o__Coriobacteriales;f__Coriobacteriaceae;g__Collinsella	Collinsella	0	85820	0	13804	0	74732	10530	0	26600	0	15742	1233	52081	4932	46666	589045	66840	504290	3224	14427	101538	7416	71092	0	0	0	0	0	0	420331	63285	0	111045	0	16941	0	120201	85905	111475	34604	26041	9731	36385	0	0	111371	20422
	d__Bacteria;p__Proteobacteria;c__Gammaproteobacteria;o__Enterobacterales;f__Pasteurellaceae;g__Conservatibacter	Conservatibacter	0	0	0	0	0	0	0	0	0	0	0	0	0	0	0	0	0	0	0	0	0	0	0	0	0	0	0	0	0	0	0	0	0	0	0	0	0	0	0	0	0	0	0	0	0	0	0
	d__Bacteria;p__Firmicutes;c__Bacilli;o__Erysipelotrichales;f__Coprobacillaceae;g__Coprobacillus	Coprobacillus	0	0	0	0	0	0	0	0	0	0	0	0	0	0	0	0	18337	0	0	0	0	0	0	0	0	0	0	0	0	0	0	0	0	0	0	0	0	0	0	0	0	5459	0	0	0	0	0
	d__Bacteria;p__Bacteroidota;c__Bacteroidia;o__Bacteroidales;f__Coprobacteraceae;g__Coprobacter	Coprobacter	0	0	0	0	0	0	0	0	0	0	0	0	0	0	0	0	0	0	0	0	0	0	0	0	0	0	0	0	0	0	0	0	0	0	0	0	0	0	0	0	0	0	0	0	0	0	0
	d__Bacteria;p__Firmicutes_A;c__Clostridia;o__Lachnospirales;f__Lachnospiraceae;g__Coprococcus	Coprococcus	0	0	0	0	0	0	0	0	0	0	0	0	0	0	0	0	0	0	1937	0	758	31478	32	0	0	0	0	0	0	0	0	0	0	0	0	0	0	0	0	0	0	0	0	0	0	0	0
	d__Bacteria;p__Firmicutes_A;c__Clostridia;o__Lachnospirales;f__Lachnospiraceae;g__Coprococcus_A	Coprococcus_A	0	0	0	0	0	0	0	0	0	0	3328	0	0	1825	0	0	0	0	158410	488	0	1273	16074	0	0	0	0	0	0	0	0	0	0	0	0	0	0	24450	7033	0	0	4670	0	0	0	0	0
	d__Bacteria;p__Firmicutes_A;c__Clostridia;o__Lachnospirales;f__Lachnospiraceae;g__Copromonas	Copromonas	0	41598	0	0	0	0	0	0	0	0	19898	0	18116	12098	1803	171459	26741	3369	2230	10828	10714	2569	18795	33606	0	0	0	0	0	0	0	0	0	0	0	701829	61581	9130	11017	0	587	60224	7901	46503	11619	35661	105
	d__Bacteria;p__Firmicutes_A;c__Clostridia;o__Peptostreptococcales;f__Anaerovoracaceae;g__Copromorpha	Copromorpha	0	0	0	0	0	0	0	0	0	0	0	0	2337	2169	8581	5031	0	8685	0	139	28	8132	0	0	0	0	0	0	0	0	0	0	0	0	0	0	1177	2012	308	0	0	0	191	0	0	523	322
	d__Bacteria;p__Actinobacteriota;c__Coriobacteriia;o__Coriobacteriales;f__Coriobacteriaceae;g__Coprousia	Coprousia	0	381	0	0	0	0	0	0	79	0	0	0	147	0	131	1733	184	1693	0	0	269	0	116	0	0	0	0	0	0	505	0	0	0	0	0	0	107	0	0	0	0	0	0	0	0	13	0
	d__Bacteria;p__Actinobacteriota;c__Coriobacteriia;o__Coriobacteriales;f__Coriobacteriaceae;g__Coriobacterium	Coriobacterium	0	244	0	0	0	43	0	0	205	8	0	0	126	0	154	942	101	712	0	0	151	0	84	0	0	0	0	0	0	181	0	0	17	0	0	0	77	51	25	0	17	0	0	0	0	0	0
	d__Bacteria;p__Proteobacteria;c__Gammaproteobacteria;o__Enterobacterales;f__Pasteurellaceae;g__Cricetibacter	Cricetibacter	0	0	0	0	0	0	0	0	0	0	0	0	0	0	0	0	0	0	0	0	0	0	0	0	0	0	0	0	0	0	0	0	0	0	0	0	0	0	0	0	0	0	0	0	0	0	0
	d__Bacteria;p__Proteobacteria;c__Gammaproteobacteria;o__Enterobacterales;f__Enterobacteriaceae;g__Cronobacter	Cronobacter	0	0	0	0	0	0	0	0	0	0	0	0	0	0	0	0	0	0	0	0	0	0	0	0	0	0	0	0	95	0	0	0	0	0	0	0	0	0	0	0	0	0	0	0	0	0	0
	d__Bacteria;p__Bacteroidota;c__Bacteroidia;o__Bacteroidales;f__UBA932;g__Cryptobacteroides	Cryptobacteroides	0	3162	0	0	0	0	0	0	0	0	192817	0	0	1471521	4843772	0	0	626231	0	0	899109	124533	43936	0	0	0	0	0	0	0	0	0	0	0	0	0	0	0	0	0	9065	0	141252	0	0	0	0
	d__Bacteria;p__Actinobacteriota;c__Actinomycetia;o__Propionibacteriales;f__Propionibacteriaceae;g__Cutibacterium	Cutibacterium	0	0	0	0	0	0	0	0	0	0	0	0	0	0	0	0	0	0	0	0	0	0	0	0	0	0	0	0	0	0	0	0	0	0	0	0	0	0	0	0	0	0	0	0	0	0	0
	d__Bacteria;p__Desulfobacterota_I;c__Desulfovibrionia;o__Desulfovibrionales;f__Desulfovibrionaceae;g__Desulfovibrio	Desulfovibrio	0	0	0	0	0	0	0	0	0	2365	0	0	0	14302	1996	15293	0	0	0	0	14563	72285	0	0	0	0	0	0	0	0	0	0	0	0	0	0	0	0	0	25948	0	16798	0	0	1083	0	0
	d__Bacteria;p__Firmicutes_C;c__Negativicutes;o__Veillonellales;f__Dialisteraceae;g__Dialister	Dialister	0	120664	0	25866	0	0	315	0	733	483	0	3180	111306	58180	13182	25863	29961	166919	164393	49102	120504	102349	97997	0	0	0	0	0	0	203293	1176	0	22869	0	0	51610	0	37354	268581	169849	352363	30994	120098	296	11220	2217	13323
	d__Bacteria;p__Proteobacteria;c__Gammaproteobacteria;o__Enterobacterales;f__Enterobacteriaceae;g__Dickeya	Dickeya	0	0	0	0	0	0	0	0	0	0	0	0	0	0	0	0	0	0	0	0	0	0	0	0	0	0	0	0	273	0	0	0	0	117	0	0	0	0	0	0	0	0	0	0	0	0	0
	d__Bacteria;p__Firmicutes;c__Bacilli;o__Erysipelotrichales;f__Erysipelotrichaceae;g__Dielma	Dielma	0	0	0	0	0	0	0	0	0	0	0	0	0	0	0	0	0	0	0	0	0	0	0	0	0	0	0	0	0	0	0	0	0	0	0	0	0	0	0	0	0	0	0	0	0	108	0
	d__Bacteria;p__Proteobacteria;c__Gammaproteobacteria;o__Enterobacterales;f__Enterobacteriaceae;g__Doolittlea	Doolittlea	0	0	0	0	0	0	0	0	34	0	0	0	0	0	0	0	0	0	0	0	0	0	0	0	0	0	0	0	11	0	0	0	0	0	0	0	0	0	0	0	0	0	0	0	0	0	0
	d__Bacteria;p__Firmicutes_A;c__Clostridia;o__Lachnospirales;f__Lachnospiraceae;g__Dorea	Dorea	0	13949	0	0	0	0	0	0	107	40956	3650	0	50128	6672	31803	50404	7555	15261	7689	4845	6366	12126	53999	15179	0	0	0	0	0	41773	36	0	761	0	0	21131	115884	4905	11065	0	3556	6468	6220	156996	15528	14712	4695
	d__Bacteria;p__Firmicutes_A;c__Clostridia;o__Lachnospirales;f__Lachnospiraceae;g__Dorea_A	Dorea_A	0	7066	0	0	0	0	0	0	56459	0	24443	0	98021	32631	656	343808	21719	38581	13686	36200	38801	8849	122348	13381	0	0	0	0	0	0	67151	0	175702	0	0	30	98	29899	42056	0	20787	14057	51382	0	0	188242	969
	d__Bacteria;p__Firmicutes_A;c__Clostridia;o__Lachnospirales;f__Lachnospiraceae;g__Dorea_B	Dorea_B	0	0	0	0	0	0	0	0	0	0	0	0	208	0	0	393	0	0	0	0	0	0	343	0	0	0	0	0	0	0	0	0	0	0	0	0	0	0	0	0	0	0	0	0	0	384	0
	d__Bacteria;p__Bacteroidota;c__Bacteroidia;o__Bacteroidales;f__Rikenellaceae;g__DSM-108975	DSM-108975	0	0	0	0	0	0	0	0	0	0	0	0	169	0	136	0	0	544	0	207	0	539	0	0	0	0	0	0	0	0	0	0	0	0	0	0	0	655	0	0	0	0	0	0	0	613	1157
	d__Bacteria;p__Proteobacteria;c__Gammaproteobacteria;o__Burkholderiales;f__Burkholderiaceae;g__Duodenibacillus	Duodenibacillus	0	0	0	0	0	0	0	0	0	0	11516	0	0	2718	1275	0	50550	0	7338	0	4834	514	643	0	0	0	0	0	0	0	0	0	0	0	0	728218	18313	12077	0	45996	52624	52934	1666	0	0	0	0
	d__Bacteria;p__Bacteroidota;c__Bacteroidia;o__Bacteroidales;f__Dysgonomonadaceae;g__Dysgonomonas	Dysgonomonas	0	0	0	0	0	0	0	0	0	0	0	0	0	0	86	0	42007	0	0	74	0	48	0	0	0	0	0	0	0	0	0	0	0	0	0	0	0	108	0	0	0	0	0	0	0	24	0
	d__Bacteria;p__Firmicutes_A;c__Clostridia;o__Oscillospirales;f__Oscillospiraceae;g__Dysosmobacter	Dysosmobacter	0	0	0	0	0	0	0	0	0	0	100638	0	0	69019	0	0	240	0	9428	16185	19611	105731	9772	6882	0	0	0	0	0	0	0	0	0	0	0	0	0	39924	0	0	0	44014	0	0	0	118054	126195
	d__Bacteria;p__Proteobacteria;c__Gammaproteobacteria;o__Enterobacterales;f__Enterobacteriaceae;g__Edaphovirga	Edaphovirga	0	0	0	0	0	0	0	0	0	0	0	0	0	0	0	0	0	0	0	0	0	0	0	0	0	0	0	0	55	0	0	0	0	0	0	0	0	0	0	0	0	0	0	0	0	0	0
	d__Bacteria;p__Proteobacteria;c__Gammaproteobacteria;o__Enterobacterales;f__Enterobacteriaceae;g__Edwardsiella	Edwardsiella	0	0	0	0	0	0	0	0	0	0	0	0	0	0	0	0	0	0	0	0	0	0	0	0	0	0	0	0	0	0	0	0	0	0	0	0	0	0	0	0	0	0	0	0	0	0	0
	d__Bacteria;p__Actinobacteriota;c__Coriobacteriia;o__Coriobacteriales;f__Eggerthellaceae;g__Eggerthella	Eggerthella	0	0	0	12508	17135	0	0	3643	173830	51337	0	0	675	0	380	41132	46432	0	0	0	0	2422	0	26109	0	0	0	12819	0	35556	2775	1441	7102	0	0	0	55326	0	2253	0	0	1958	280	0	25962	6244	8681
	d__Bacteria;p__Firmicutes_A;c__Clostridia;o__Lachnospirales;f__Lachnospiraceae;g__Eisenbergiella	Eisenbergiella	0	0	0	37652	0	0	0	0	0	0	2770	0	0	6814	31800	0	35478	0	6854	2818	0	1377	4362	0	0	0	0	0	0	0	0	0	0	0	0	0	296	18978	3261	0	0	43196	0	5129	0	87974	28063
	d__Bacteria;p__Actinobacteriota;c__Coriobacteriia;o__Coriobacteriales;f__Eggerthellaceae;g__Ellagibacter	Ellagibacter	0	0	0	0	0	0	0	0	0	0	0	0	320	740	981	0	0	0	0	0	0	0	0	0	0	0	0	0	0	0	0	0	0	0	0	0	0	0	0	0	6285	0	4126	0	0	0	0
	d__Bacteria;p__Actinobacteriota;c__Coriobacteriia;o__Coriobacteriales;f__Coriobacteriaceae;g__Enorma	Enorma	0	0	0	0	0	0	0	0	0	0	0	0	55	0	0	2771	0	1578	0	0	405	0	272	0	0	0	0	0	0	0	0	0	0	0	0	0	0	0	0	0	0	0	0	0	0	0	0
	d__Bacteria;p__Proteobacteria;c__Gammaproteobacteria;o__Enterobacterales;f__Enterobacteriaceae;g__Enterobacillus	Enterobacillus	0	0	0	0	0	0	0	0	0	0	0	0	0	0	0	0	0	0	0	0	0	0	0	0	0	0	0	0	109	0	0	0	0	36	0	0	0	0	0	0	0	0	0	0	0	0	0
	d__Bacteria;p__Proteobacteria;c__Gammaproteobacteria;o__Enterobacterales;f__Enterobacteriaceae;g__Enterobacter	Enterobacter	679	4071	0	0	0	0	0	0	1101	0	0	0	0	0	0	401	0	0	0	0	0	0	0	0	17975	0	0	0	522379	0	0	0	0	1547	0	0	0	0	0	0	0	0	0	0	0	8343	0
	d__Bacteria;p__Proteobacteria;c__Gammaproteobacteria;o__Enterobacterales;f__Enterobacteriaceae;g__Enterobacter_A	Enterobacter_A	5314	418	22	0	200	2066	439	0	2409	154	0	109	175	0	0	1369	109	0	0	0	0	0	0	0	1776	0	533	485	20275	66	807	574	900	2649	0	109	43	0	0	531	0	0	0	702	22	282	0
	d__Bacteria;p__Proteobacteria;c__Gammaproteobacteria;o__Enterobacterales;f__Enterobacteriaceae;g__Enterobacter_B	Enterobacter_B	7556	308	140	0	622	2487	453	0	2786	117	0	70	118	0	0	1901	23	0	0	0	0	0	0	94	1112	0	427	377	12914	0	520	523	1098	2986	0	0	0	0	0	261	0	0	0	574	0	116	0
	d__Bacteria;p__Proteobacteria;c__Gammaproteobacteria;o__Enterobacterales;f__Enterobacteriaceae;g__Enterobacter_D	Enterobacter_D	4396	532	27	0	221	923	55	0	2295	55	0	0	138	0	0	1434	27	0	0	0	0	0	0	27	1574	0	333	110	10348	0	641	333	637	2440	0	0	0	0	0	253	0	0	0	196	0	82	0
	d__Bacteria;p__Firmicutes_A;c__Clostridia;o__Lachnospirales;f__Lachnospiraceae;g__Enterocloster	Enterocloster	0	43501	0	0	0	0	0	26708	0	20862	552	44780	33538	2853	6339	32400	91279	20806	257	5823	8172	144	20250	31138	0	0	0	0	0	195625	32537	0	0	0	0	175213	16365	10334	20160	5916	53178	32502	6241	31507	89332	107694	42732
	d__Bacteria;p__Firmicutes;c__Bacilli;o__Lactobacillales;f__Enterococcaceae;g__Enterococcus	Enterococcus	0	9581	0	0	94785	60099	0	0	18679	0	0	0	512	0	0	0	0	0	0	0	0	0	0	17515	0	0	16169	539	0	0	0	7568	0	0	0	0	0	0	0	0	0	0	0	0	0	0	0
	d__Bacteria;p__Firmicutes;c__Bacilli;o__Lactobacillales;f__Enterococcaceae;g__Enterococcus_A	Enterococcus_A	0	0	0	5859	87726	0	0	0	51984	48912	0	0	0	0	0	27017	0	0	0	0	0	0	0	126185	0	0	1078	1665	246000	8309	54416	15105	1663	929	0	0	28083	0	0	0	0	0	0	0	9441	0	0
	d__Bacteria;p__Firmicutes;c__Bacilli;o__Lactobacillales;f__Enterococcaceae;g__Enterococcus_B	Enterococcus_B	0	0	0	0	0	0	0	0	0	4500	0	0	0	0	0	0	0	0	0	0	0	0	0	0	0	0	0	0	0	0	0	0	0	0	0	0	0	0	0	0	0	0	0	5755	2043	0	0
	d__Bacteria;p__Firmicutes;c__Bacilli;o__Lactobacillales;f__Enterococcaceae;g__Enterococcus_C	Enterococcus_C	0	0	0	0	0	0	0	0	0	27	0	0	0	0	0	0	0	0	0	0	0	0	0	266	0	0	0	0	0	0	0	0	0	0	0	0	0	0	0	0	0	0	0	0	2946	0	0
	d__Bacteria;p__Firmicutes;c__Bacilli;o__Lactobacillales;f__Enterococcaceae;g__Enterococcus_D	Enterococcus_D	0	0	0	2826	0	0	0	0	0	55873	0	0	0	0	0	0	0	0	0	0	0	0	0	35717	0	0	0	0	0	1410	235	0	11088	0	0	0	0	0	0	0	0	0	0	0	287	0	0
	d__Bacteria;p__Firmicutes;c__Bacilli;o__Lactobacillales;f__Enterococcaceae;g__Enterococcus_E	Enterococcus_E	0	0	0	0	0	0	0	0	0	0	0	0	0	0	0	0	0	0	0	0	0	0	0	0	0	0	0	0	0	0	0	0	0	0	0	0	0	0	0	0	0	0	0	0	0	0	0
	d__Bacteria;p__Firmicutes;c__Bacilli;o__Lactobacillales;f__Enterococcaceae;g__Enterococcus_F	Enterococcus_F	0	0	0	0	0	0	0	0	0	0	0	0	0	0	0	0	0	0	0	0	0	0	0	0	0	0	0	0	0	0	0	0	0	0	0	0	0	0	0	0	0	0	0	0	0	0	0
	d__Bacteria;p__Firmicutes;c__Bacilli;o__Lactobacillales;f__Enterococcaceae;g__Enterococcus_I	Enterococcus_I	0	0	0	0	0	0	0	0	0	0	0	0	0	0	0	0	0	0	0	0	0	0	0	0	0	0	0	0	0	0	0	0	0	0	0	0	0	0	0	0	0	0	0	0	0	0	0
	d__Bacteria;p__Actinobacteriota;c__Coriobacteriia;o__Coriobacteriales;f__Eggerthellaceae;g__Enteroscipio	Enteroscipio	0	0	0	0	0	0	0	0	3251	395	0	0	0	0	0	122	194	0	0	0	0	0	0	48	0	0	0	0	0	0	0	0	0	0	0	0	369	0	0	0	0	0	0	0	0	0	0
	d__Bacteria;p__Firmicutes_A;c__Clostridia;o__Oscillospirales;f__Oscillospiraceae;g__ER4	ER4	0	0	0	0	0	0	0	0	0	0	161553	0	0	392568	0	0	0	0	176784	0	77548	436284	15573	0	0	0	0	0	0	0	0	0	0	0	0	0	0	57183	0	0	0	91650	0	0	0	0	0
	d__Bacteria;p__Proteobacteria;c__Gammaproteobacteria;o__Enterobacterales;f__Enterobacteriaceae;g__Erwinia	Erwinia	636	15	0	0	48	0	0	0	1085	47	0	0	0	0	0	288	32	0	0	0	0	0	0	0	192	0	96	0	4086	0	48	16	63	850	0	0	0	0	0	48	0	0	0	80	0	0	0
	d__Bacteria;p__Proteobacteria;c__Gammaproteobacteria;o__Enterobacterales;f__Enterobacteriaceae;g__Erwinia_A	Erwinia_A	295	0	0	0	0	63	0	0	194	0	0	0	0	0	0	63	0	0	0	0	0	0	0	0	410	0	106	0	826	0	42	0	107	452	0	0	0	0	0	0	0	0	0	0	0	0	0
	d__Bacteria;p__Proteobacteria;c__Gammaproteobacteria;o__Enterobacterales;f__Enterobacteriaceae;g__Erwinia_B	Erwinia_B	344	0	0	0	0	0	0	0	316	0	0	0	0	0	0	24	0	0	0	0	0	0	0	0	122	0	0	0	1653	0	0	0	0	195	0	0	0	0	0	0	0	0	0	0	0	0	0
	d__Bacteria;p__Firmicutes;c__Bacilli;o__Erysipelotrichales;f__Coprobacillaceae;g__Erysipelatoclostridium	Erysipelatoclostridium	0	725	0	9941	0	0	0	0	0	31346	0	0	0	0	166	14916	943	53	0	0	0	0	0	13070	0	0	0	0	0	31437	33629	0	4550	0	0	4326	36873	1522	3788	0	0	19067	0	8248	10439	7803	12540
	d__Bacteria;p__Proteobacteria;c__Gammaproteobacteria;o__Enterobacterales;f__Enterobacteriaceae;g__Escherichia	Escherichia	0	941864	681266	138535	553543	0	1272324	198643	1283546	404552	0	294057	632340	0	5520	483763	515382	310418	16757	100482	1523	50803	992	194737	1063967	11215	1435438	1126782	980	167125	1763977	1440708	2195480	2896097	118986	349878	186847	40836	100960	954956	73367	0	12816	2075417	106590	88627	0
	d__Bacteria;p__Proteobacteria;c__Gammaproteobacteria;o__Enterobacterales;f__Enterobacteriaceae;g__Escherichia_C	Escherichia_C	365	525	214	0	236	21	685	0	1890	281	0	85	450	0	0	997	84	42	0	0	0	0	0	127	1089	0	514	406	2784	42	762	939	1150	1521	0	192	0	0	0	406	0	0	0	556	21	0	0
	d__Bacteria;p__Firmicutes_A;c__Clostridia;o__Eubacteriales;f__Eubacteriaceae;g__Eubacterium	Eubacterium	0	0	0	41054	0	0	0	88238	0	0	0	0	0	0	1040	0	0	0	0	0	0	0	5719	0	0	0	0	0	0	182	1967	0	0	0	0	0	7706	0	0	0	0	0	0	0	0	0	0
	d__Bacteria;p__Firmicutes_A;c__Clostridia;o__Lachnospirales;f__Lachnospiraceae;g__Eubacterium_F	Eubacterium_F	0	0	0	0	0	0	0	0	0	0	0	0	0	38870	0	0	0	0	0	0	0	35201	0	0	0	0	0	0	0	0	0	0	0	0	0	0	0	1420	0	0	0	59445	0	0	0	0	0
	d__Bacteria;p__Firmicutes_A;c__Clostridia;o__Lachnospirales;f__Lachnospiraceae;g__Eubacterium_G	Eubacterium_G	0	0	0	0	0	0	0	0	0	0	325	0	0	58673	0	0	0	0	544	0	0	9170	0	0	0	0	0	0	0	0	0	0	0	0	0	0	0	0	0	0	0	255	0	0	0	0	0
	d__Bacteria;p__Firmicutes_A;c__Clostridia;o__Lachnospirales;f__Lachnospiraceae;g__Eubacterium_I	Eubacterium_I	0	0	0	0	0	0	0	0	0	0	3907	0	2596	27770	0	0	0	0	2976	4171	3271	3543	8641	0	0	0	0	0	0	0	0	0	0	0	0	53	0	18585	52	0	0	6100	0	0	0	0	0
	d__Bacteria;p__Firmicutes_A;c__Clostridia;o__Oscillospirales;f__Acutalibacteraceae;g__Eubacterium_R	Eubacterium_R	0	0	0	0	0	0	0	0	0	0	14750	0	0	357558	0	0	0	0	11488	0	52958	65069	0	0	0	0	0	0	0	0	0	0	0	0	0	0	0	25018	511763	0	0	0	0	0	0	0	0
	d__Bacteria;p__Firmicutes_A;c__Clostridia;o__Oscillospirales;f__Oscillospiraceae;g__Evtepia	Evtepia	0	0	0	0	0	0	0	0	0	0	545	0	0	2675	8849	0	1821	0	0	0	0	17287	2082	0	0	0	0	0	0	1797	0	0	0	0	0	0	0	5433	0	0	0	2421	0	0	0	4454	7504
	d__Bacteria;p__Proteobacteria;c__Gammaproteobacteria;o__Enterobacterales;f__Enterobacteriaceae;g__Ewingella	Ewingella	3217	207	0	0	0	967	343	0	2892	0	0	0	0	0	0	1623	0	0	0	0	0	0	0	0	623	0	0	0	13688	0	0	0	69	2245	0	0	0	0	0	0	0	0	0	0	0	0	0
	d__Bacteria;p__Firmicutes_A;c__Clostridia;o__Lachnospirales;f__Lachnospiraceae;g__Extibacter	Extibacter	0	0	0	0	0	0	0	0	0	0	0	0	3618	0	0	0	0	0	0	0	0	10376	323	0	0	0	0	0	0	0	0	0	0	0	0	0	228733	0	0	0	0	0	0	0	0	142	0
	d__Bacteria;p__Firmicutes_C;c__Negativicutes;o__Veillonellales;f__Veillonellaceae;g__F0422	F0422	23	0	0	0	0	0	26704	0	0	0	0	0	0	0	0	0	0	0	0	0	0	0	0	0	0	0	0	0	0	0	0	0	0	0	0	0	0	0	0	0	0	0	0	0	0	0	0
	d__Bacteria;p__Firmicutes;c__Bacilli;o__Erysipelotrichales;f__Coprobacillaceae;g__Faecalibacillus	Faecalibacillus	0	0	0	0	0	0	0	0	0	0	0	0	0	6721	8305	0	1929	0	713	0	0	0	0	0	0	0	0	0	0	0	0	0	0	0	0	0	0	2223	5828	0	0	0	0	0	0	0	0
	d__Bacteria;p__Firmicutes_A;c__Clostridia;o__Oscillospirales;f__Ruminococcaceae;g__Faecalibacterium	Faecalibacterium	0	1216087	0	63266	0	0	0	0	0	0	513094	0	610685	340600	31995	2319140	0	322035	289364	235699	306460	908585	1723112	212446	0	0	0	0	0	0	0	0	0	92875	0	322889	185739	604462	346839	0	87696	535652	105005	615473	4821624	1327399	157273
	d__Bacteria;p__Firmicutes;c__Bacilli;o__Erysipelotrichales;f__Erysipelotrichaceae;g__Faecalicoccus	Faecalicoccus	0	0	0	0	0	0	0	0	0	0	8	0	0	0	0	0	0	0	0	0	0	0	0	0	0	0	0	0	0	0	0	0	0	0	0	0	0	0	0	0	0	0	0	86	0	0	0
	d__Bacteria;p__Firmicutes_A;c__Clostridia;o__Lachnospirales;f__Lachnospiraceae;g__Faecalimonas	Faecalimonas	0	0	0	0	0	0	0	0	0	0	0	0	0	0	0	0	0	359	0	0	0	0	113	45050	0	0	0	0	0	140737	0	0	0	0	0	0	0	0	0	0	0	0	0	311	18329	208	0
	d__Bacteria;p__Firmicutes_A;c__Clostridia;o__Oscillospirales;f__Oscillospiraceae;g__Faecousia	Faecousia	0	0	0	0	0	0	0	0	0	0	5583	0	0	15687	0	0	0	0	1217	0	2277	36051	4775	0	0	0	0	0	0	0	0	0	0	0	0	0	0	20380	0	0	0	4884	0	0	0	0	1923
	d__Bacteria;p__Firmicutes_A;c__Clostridia;o__Lachnospirales;f__Lachnospiraceae;g__Falcatimonas	Falcatimonas	0	0	0	0	0	0	0	0	0	0	0	0	0	16	0	0	0	0	0	0	0	0	0	0	0	0	0	0	0	0	0	0	0	0	0	0	0	0	0	0	0	0	0	0	0	0	0
	d__Bacteria;p__Firmicutes_A;c__Clostridia;o__Lachnospirales;f__Lachnospiraceae;g__FD2005	FD2005	0	0	0	0	0	0	0	0	0	0	0	0	0	67	0	0	0	0	0	0	0	0	34	0	0	0	0	0	0	0	0	0	0	0	0	0	0	0	0	0	0	0	0	0	0	0	0
	d__Bacteria;p__Firmicutes_A;c__Clostridia;o__Oscillospirales;f__Acutalibacteraceae;g__Fimenecus	Fimenecus	0	0	0	0	0	0	0	0	0	0	110	0	250007	26620	0	0	0	533368	32230	97155	20564	314175	475314	0	0	0	0	0	0	0	0	0	0	0	0	0	0	60671	0	0	9247	679480	0	0	0	0	0
	d__Bacteria;p__Firmicutes_A;c__Clostridia;o__Lachnospirales;f__Lachnospiraceae;g__Fimimorpha	Fimimorpha	0	0	0	0	0	0	0	0	0	0	0	0	0	0	0	0	0	0	0	0	0	0	12	0	0	0	0	0	0	0	0	0	0	0	0	0	0	0	0	0	0	0	0	0	0	0	0
	d__Bacteria;p__Firmicutes_A;c__Clostridia;o__Lachnospirales;f__Lachnospiraceae;g__Fimousia	Fimousia	0	0	0	0	0	0	0	0	0	0	269	0	0	536	0	0	0	0	0	0	0	0	1092	0	0	0	0	0	0	0	0	0	0	0	0	0	0	338	0	0	0	0	0	0	0	0	0
	d__Bacteria;p__Firmicutes_A;c__Clostridia;o__Tissierellales;f__Peptoniphilaceae;g__Finegoldia	Finegoldia	0	0	0	0	0	34138	0	0	0	0	0	0	0	0	0	0	0	0	0	0	0	0	0	0	0	0	23	0	0	0	0	494	0	0	0	0	0	0	0	268	0	0	0	0	0	0	0
	d__Bacteria;p__Firmicutes_A;c__Clostridia;o__Oscillospirales;f__Oscillospiraceae;g__Flavonifractor	Flavonifractor	0	23747	0	61907	0	0	0	0	0	60965	491	0	8757	96	16085	0	90109	150799	0	13923	0	3754	3062	79728	167867	0	0	0	0	17345	0	0	91999	7367	0	0	113918	10918	7071	87975	0	3708	0	680	8239	59478	34254
	d__Bacteria;p__Firmicutes_A;c__Clostridia;o__Oscillospirales;f__CAG-272;g__Flemingibacterium	Flemingibacterium	0	0	0	0	0	0	0	0	0	0	0	0	0	6880	0	0	0	0	0	0	0	1633	0	0	0	0	0	0	0	0	0	0	0	0	0	0	0	0	0	0	0	9736	0	0	0	0	0
	d__Bacteria;p__Firmicutes;c__Bacilli;o__Erysipelotrichales;f__Erysipelotrichaceae;g__Floccifex	Floccifex	0	0	0	0	0	0	0	0	0	0	244	0	0	204	0	0	0	0	0	104	0	259	52	0	0	0	0	0	0	0	0	0	0	0	0	0	0	115	0	0	0	0	0	317	44	0	0
	d__Bacteria;p__Proteobacteria;c__Gammaproteobacteria;o__Enterobacterales;f__Enterobacteriaceae;g__Franconibacter	Franconibacter	5490	0	0	0	0	902	0	0	1317	0	0	0	0	0	0	1160	0	0	0	0	0	0	0	0	441	0	90	0	11902	0	0	267	268	2643	0	0	0	0	0	0	0	0	0	0	0	0	0
	d__Bacteria;p__Firmicutes_A;c__Clostridia;o__Lachnospirales;f__Lachnospiraceae;g__Fusicatenibacter	Fusicatenibacter	0	0	0	0	0	0	0	0	0	0	11445	0	12751	25325	0	0	0	0	0	3992	0	20059	5510	0	0	0	0	0	0	0	0	0	0	0	0	0	0	4270	14938	0	0	21036	2625	0	0	4144	2697
	d__Bacteria;p__Fusobacteriota;c__Fusobacteriia;o__Fusobacteriales;f__Fusobacteriaceae;g__Fusobacterium	Fusobacterium	0	0	3668	0	0	468	0	0	0	0	0	0	0	0	0	1117	1335	0	0	0	0	0	0	0	0	0	0	9874	0	0	2983	9893	0	0	0	0	0	0	0	3289	57	0	0	11229	16292	750	0
	d__Bacteria;p__Bacteroidota;c__Bacteroidia;o__Bacteroidales;f__Marinifilaceae;g__Gabonibacter	Gabonibacter	0	0	0	0	0	0	0	0	0	0	0	0	0	0	77	0	0	219	0	0	0	287	0	0	0	0	0	0	0	0	0	0	0	0	0	0	0	0	0	394	0	0	0	0	0	0	0
	d__Bacteria;p__Proteobacteria;c__Gammaproteobacteria;o__Enterobacterales;f__Pasteurellaceae;g__Gallibacterium	Gallibacterium	0	0	0	0	0	0	0	0	0	0	0	0	0	0	0	0	0	0	0	0	0	0	0	0	0	0	0	0	0	0	0	0	0	0	0	0	0	0	0	0	0	0	0	0	0	0	0
	d__Bacteria;p__Actinobacteriota;c__Actinomycetia;o__Actinomycetales;f__Bifidobacteriaceae;g__Galliscardovia	Galliscardovia	0	857	0	663	1182	647	1113	0	638	1827	0	185	218	0	1195	1781	134	678	0	0	275	0	0	548	0	285	1547	1148	987	150	398	268	165	0	50	0	731	0	0	0	1638	0	164	284	299	186	182
	d__Bacteria;p__Firmicutes_A;c__Clostridia;o__Peptostreptococcales;f__Peptostreptococcaceae;g__GCA-900066495	GCA-900066495	0	0	0	0	0	0	0	0	0	0	0	0	0	0	0	0	0	0	0	0	0	0	0	0	0	0	0	0	0	0	0	0	0	0	0	0	0	0	0	0	0	0	0	0	0	0	0
	d__Bacteria;p__Proteobacteria;c__Gammaproteobacteria;o__Enterobacterales;f__Enterobacteriaceae;g__GCF-000287335	GCF-000287335	0	0	0	0	0	0	0	0	0	0	0	0	0	0	0	0	0	0	0	0	0	0	0	0	0	0	0	0	0	0	0	0	0	0	0	0	0	0	0	0	0	0	0	0	0	0	0
	d__Bacteria;p__Proteobacteria;c__Gammaproteobacteria;o__Enterobacterales;f__Pasteurellaceae;g__GCF-002002485	GCF-002002485	0	117	0	0	0	0	0	0	0	0	0	0	0	0	0	0	0	0	0	0	0	0	0	0	0	0	0	0	0	0	0	0	0	0	0	0	0	0	0	0	0	0	0	0	0	0	0
	d__Bacteria;p__Firmicutes;c__Bacilli;o__Staphylococcales;f__Gemellaceae;g__Gemella	Gemella	16768	0	22408	0	0	0	594	0	0	0	0	0	0	0	0	0	0	0	0	0	0	0	0	0	0	0	1476	0	0	0	0	0	0	0	0	0	0	0	0	0	0	0	0	0	0	0	0
	d__Bacteria;p__Firmicutes_A;c__Clostridia;o__Oscillospirales;f__Ruminococcaceae;g__Gemmiger	Gemmiger	0	0	0	0	0	0	0	0	0	0	7451	0	104935	28885	39187	0	0	67136	84670	40724	38398	23556	49559	0	0	0	0	0	0	0	0	0	0	0	0	0	0	205207	109764	0	1724	159366	16379	0	0	87264	95233
	d__Bacteria;p__Firmicutes_A;c__Clostridia;o__Oscillospirales;f__Ruminococcaceae;g__Gemmiger_A	Gemmiger_A	0	16	0	0	0	0	0	0	0	0	161	0	64	192	0	48	0	48	32	0	0	497	258	0	0	0	0	0	0	0	0	0	0	0	0	0	192	487	112	0	0	258	0	0	97	144	80
	d__Bacteria;p__Proteobacteria;c__Gammaproteobacteria;o__Enterobacterales;f__Enterobacteriaceae;g__Gibbsiella	Gibbsiella	0	0	0	0	0	0	0	0	0	0	0	0	0	0	0	0	0	0	0	0	0	0	0	0	0	0	0	0	103	0	0	0	0	0	0	0	0	0	0	0	0	0	0	0	0	0	0
	d__Bacteria;p__Actinobacteriota;c__Coriobacteriia;o__Coriobacteriales;f__Eggerthellaceae;g__Gordonibacter	Gordonibacter	0	0	0	0	0	0	0	0	0	0	0	0	0	0	0	0	0	0	0	0	0	0	0	1668	0	0	0	0	0	0	0	0	0	0	0	0	0	0	0	0	0	0	0	0	0	0	0
	d__Bacteria;p__Firmicutes;c__Bacilli;o__Lactobacillales;f__Aerococcaceae;g__Granulicatella	Granulicatella	671	2663	0	0	0	0	452	0	0	0	0	0	0	0	0	0	0	0	0	0	0	0	0	0	0	0	2092	0	0	0	0	0	0	0	0	0	0	0	0	0	0	0	0	0	0	0	0
	d__Bacteria;p__Proteobacteria;c__Gammaproteobacteria;o__Enterobacterales;f__Pasteurellaceae;g__Haemophilus	Haemophilus	2576	18452	54633	0	1484	0	34404	0	0	0	0	50517	859	0	0	0	0	0	0	0	0	0	1141	0	0	56447	0	0	0	0	1781	0	0	0	0	8634	0	0	0	2679	5237	0	0	96	0	0	0
	d__Bacteria;p__Proteobacteria;c__Gammaproteobacteria;o__Enterobacterales;f__Pasteurellaceae;g__Haemophilus_A	Haemophilus_A	0	36733	550	0	0	0	0	0	0	0	0	6954	0	0	0	0	0	0	0	76	0	0	0	0	0	0	0	0	0	0	0	0	24277	0	0	3377	0	0	0	751	0	0	0	0	0	0	0
	d__Bacteria;p__Proteobacteria;c__Gammaproteobacteria;o__Enterobacterales;f__Pasteurellaceae;g__Haemophilus_B	Haemophilus_B	0	242	0	0	0	0	0	0	0	0	0	66	0	0	0	0	0	0	0	0	0	0	0	0	0	0	0	0	0	0	0	0	0	0	0	0	0	0	0	0	0	0	0	0	0	0	0
	d__Bacteria;p__Proteobacteria;c__Gammaproteobacteria;o__Enterobacterales;f__Pasteurellaceae;g__Haemophilus_D	Haemophilus_D	0	41663	33736	0	42723	776	1684	0	0	0	3403	14019	335	0	0	715	0	0	1189	11760	2166	3740	40939	0	0	18342	0	0	0	3322	396	2201	7914	0	0	2337	0	0	1969	65194	25732	93	12796	7806	0	636	0
	d__Bacteria;p__Proteobacteria;c__Gammaproteobacteria;o__Enterobacterales;f__Enterobacteriaceae;g__Hafnia	Hafnia	0	0	0	0	0	0	0	0	371	0	0	0	0	0	0	0	0	0	0	0	0	0	0	0	0	0	0	0	214	0	0	0	0	0	0	0	0	0	0	0	0	0	0	0	0	0	0
	d__Bacteria;p__Firmicutes_A;c__Clostridia;o__Oscillospirales;f__Ruminococcaceae;g__Harryflintia	Harryflintia	0	0	0	0	0	0	0	0	0	0	0	0	0	0	0	0	0	0	0	0	0	34	0	0	0	0	0	0	0	0	0	0	0	0	0	0	0	0	0	0	0	419	0	0	0	0	0
	d__Bacteria;p__Firmicutes_A;c__Clostridia;o__Lachnospirales;f__Lachnospiraceae;g__Hespellia	Hespellia	0	0	0	45	0	0	0	0	0	0	359	0	274	408	0	167	0	0	241	14	0	301	556	0	0	0	0	0	0	226	0	0	0	0	0	373	0	225	149	0	0	452	0	0	89	542	44
	d__Bacteria;p__Firmicutes_A;c__Clostridia;o__Oscillospirales;f__Ruminococcaceae;g__Heteroruminococcus	Heteroruminococcus	0	0	0	0	0	0	0	0	0	0	0	0	0	0	0	0	0	0	0	0	0	55	0	0	0	0	0	0	0	0	0	0	0	0	0	0	0	67	0	0	0	0	0	0	0	0	0
	d__Bacteria;p__Firmicutes_A;c__Clostridia;o__Oscillospirales;f__Oscillospiraceae;g__Heteroscilispira	Heteroscilispira	0	0	0	0	0	0	0	0	0	0	9	0	0	214	0	0	0	0	0	0	0	106	0	0	0	0	0	0	0	0	0	0	0	0	0	0	0	0	0	0	0	107	0	0	0	0	0
	d__Bacteria;p__Bacteroidota;c__Bacteroidia;o__Bacteroidales;f__Bacteroidaceae;g__HGM04593	HGM04593	0	0	0	0	0	0	0	0	0	0	12	0	0	0	0	0	0	49	0	0	0	0	0	0	0	0	0	0	0	0	0	0	0	0	0	0	0	24	0	0	0	0	0	0	0	0	0
	d__Bacteria;p__Firmicutes_A;c__Clostridia;o__Oscillospirales;f__Oscillospiraceae;g__HGM12998	HGM12998	0	0	0	0	0	0	0	0	0	0	0	0	0	0	0	0	0	0	0	0	0	0	0	0	0	0	0	0	0	0	0	0	0	0	0	0	0	0	0	0	0	0	0	0	0	0	0
	d__Bacteria;p__Firmicutes_A;c__Clostridia;o__TANB77;f__CAG-508;g__HGM13634	HGM13634	0	0	0	0	0	0	0	0	0	0	0	0	0	0	0	0	0	0	0	0	0	374	0	0	0	0	0	0	0	0	0	0	0	0	0	0	0	0	0	0	0	595	0	0	0	0	0
	d__Bacteria;p__Proteobacteria;c__Gammaproteobacteria;o__Enterobacterales;f__Pasteurellaceae;g__Histophilus	Histophilus	0	296	70	0	0	0	0	0	0	0	0	129	0	0	0	0	0	0	0	0	0	0	0	0	0	82	0	0	0	0	0	0	0	0	0	0	0	0	0	0	0	0	0	0	0	0	0
	d__Bacteria;p__Proteobacteria;c__Gammaproteobacteria;o__Enterobacterales;f__Enterobacteriaceae;g__Hoaglandella	Hoaglandella	0	0	0	0	0	0	0	0	18	0	0	0	0	0	0	0	0	0	0	0	0	0	0	0	0	0	0	0	0	0	0	0	3	0	0	0	0	0	0	0	0	0	0	0	0	0	0
	d__Bacteria;p__Firmicutes;c__Bacilli;o__Erysipelotrichales;f__Erysipelotrichaceae;g__Holdemanella	Holdemanella	0	0	0	0	0	0	0	0	0	0	87679	0	0	71547	0	0	0	4483	5242	50333	33444	91962	32134	0	0	0	0	0	0	0	0	0	0	0	0	0	0	56308	0	6547	33682	0	13119	135602	43466	0	0
	d__Bacteria;p__Firmicutes;c__Bacilli;o__Erysipelotrichales;f__Erysipelotrichaceae;g__Holdemania	Holdemania	0	0	0	0	0	0	0	0	0	0	0	0	0	0	0	0	0	0	0	0	0	0	0	0	0	0	0	0	0	0	0	0	0	0	0	0	0	0	0	0	0	0	0	0	0	825	560
	d__Bacteria;p__Firmicutes_A;c__Clostridia;o__Lachnospirales;f__Lachnospiraceae;g__Hungatella	Hungatella	0	0	0	2697	0	0	0	0	0	92604	0	0	0	0	1531	0	167	0	0	0	0	0	0	0	3772691	0	0	0	0	0	0	0	0	0	0	98810	3940	0	0	38406	0	14585	0	0	4927	2719	1107
	d__Bacteria;p__Firmicutes_A;c__Clostridia;o__Lachnospirales;f__Lachnospiraceae;g__Hungatella_A	Hungatella_A	0	0	0	7825	0	0	0	0	0	0	0	0	0	0	0	0	0	0	0	0	0	0	0	0	241	0	0	0	0	0	0	0	0	0	0	0	0	0	0	0	0	0	0	0	0	0	0
	d__Bacteria;p__Firmicutes_A;c__Clostridia;o__Oscillospirales;f__Acutalibacteraceae;g__Hydrogeniiclostridium	Hydrogeniiclostridium	0	0	0	0	0	0	0	0	0	0	0	0	0	0	0	0	0	0	0	0	0	0	0	0	0	0	0	0	0	0	0	0	0	0	0	0	0	0	0	0	0	0	0	0	0	0	0
	d__Bacteria;p__Firmicutes_A;c__Clostridia;o__Oscillospirales;f__Ruminococcaceae;g__Hydrogenoanaerobacterium	Hydrogenoanaerobacterium	0	0	0	0	0	0	0	0	0	0	0	0	0	0	0	0	0	0	0	0	0	55	0	0	0	0	0	0	0	0	0	0	0	0	0	0	0	0	0	0	0	168	0	0	0	0	0
	d__Bacteria;p__Firmicutes_A;c__Clostridia;o__Oscillospirales;f__Oscillospiraceae;g__Instestinimonas_A	Instestinimonas_A	0	0	0	0	0	0	0	0	0	0	0	0	0	0	0	0	198	358	0	0	0	0	0	0	601	0	0	0	0	0	0	0	195	0	0	0	431	0	0	157	0	0	0	0	0	155	233
	d__Bacteria;p__Firmicutes_A;c__Clostridia;o__Oscillospirales;f__Butyricicoccaceae;g__Intestinibacillus	Intestinibacillus	0	0	0	0	0	0	0	0	0	0	0	0	0	26	0	0	0	0	0	0	0	113	0	0	0	0	0	0	0	0	0	0	0	0	0	0	0	0	0	0	0	52	0	0	0	598	0
	d__Bacteria;p__Firmicutes_A;c__Clostridia;o__Peptostreptococcales;f__Peptostreptococcaceae;g__Intestinibacter	Intestinibacter	0	0	0	0	0	0	0	0	0	10484	0	0	869	0	0	10463	2408	0	0	0	0	4482	0	0	0	0	0	0	0	3563	0	0	1127	0	0	0	0	1620	0	0	0	0	459	0	0	23984	2519
	d__Bacteria;p__Firmicutes_A;c__Clostridia;o__Oscillospirales;f__Oscillospiraceae;g__Intestinimonas	Intestinimonas	0	0	0	0	0	0	0	0	0	0	546	0	0	74	0	0	0	352	0	0	0	4145	0	0	115	0	0	0	0	0	0	0	0	265	0	0	233	3634	0	161	0	6106	0	0	0	467	0
	d__Bacteria;p__Proteobacteria;c__Gammaproteobacteria;o__Enterobacterales;f__Enterobacteriaceae;g__Izhakiella	Izhakiella	95	69	55	0	125	0	0	0	672	0	0	0	0	0	0	278	0	0	0	0	0	0	0	0	292	0	112	28	498	0	140	84	97	588	0	0	0	0	0	182	0	0	0	111	0	0	0
	d__Bacteria;p__Firmicutes_A;c__Clostridia;o__Lachnospirales;f__Lachnospiraceae;g__JAGTTR01	JAGTTR01	0	0	0	0	0	0	0	0	0	0	0	0	0	0	0	0	0	0	460	0	0	0	0	0	0	0	0	0	0	0	0	0	0	0	0	0	0	0	0	0	0	1781	0	0	0	0	0
	d__Bacteria;p__Firmicutes_A;c__Clostridia;o__Lachnospirales;f__CAG-274;g__JAHALF01	JAHALF01	158549	0	0	0	4753	6013	0	0	0	0	0	0	0	0	0	4320	0	0	0	0	0	0	0	0	0	29320	0	0	0	0	0	0	3969	0	0	0	1400	0	0	0	0	0	0	0	0	0	0
	d__Bacteria;p__Proteobacteria;c__Gammaproteobacteria;o__Enterobacterales;f__Enterobacteriaceae;g__Jejubacter	Jejubacter	4038	918	496	0	415	909	1264	0	3279	289	0	114	538	0	0	1618	489	84	0	0	0	0	0	49	1600	0	1115	1020	7882	0	1529	1032	2153	3484	0	224	0	0	0	676	0	0	0	1552	0	82	0
	d__Bacteria;p__Proteobacteria;c__Gammaproteobacteria;o__Enterobacterales;f__Enterobacteriaceae;g__JGM124	JGM124	14	363	72	0	174	0	290	0	959	130	0	71	87	0	0	320	42	0	0	0	0	0	0	0	619	0	394	87	668	0	525	359	580	405	0	0	0	0	0	274	0	0	0	217	14	0	0
	d__Bacteria;p__Firmicutes;c__Bacilli;o__Erysipelotrichales;f__Coprobacillaceae;g__Kandleria	Kandleria	0	0	0	0	0	0	0	0	0	0	221	0	0	793	0	0	0	181	0	0	0	0	0	0	0	0	0	0	0	0	0	0	0	0	0	0	0	109	0	0	0	0	182	0	0	0	0
	d__Bacteria;p__Firmicutes_A;c__Clostridia;o__Lachnospirales;f__Lachnospiraceae;g__Kineothrix	Kineothrix	0	0	0	0	0	0	0	0	0	0	0	0	0	0	0	0	0	0	0	0	0	0	100	0	0	0	0	0	0	0	0	0	0	0	0	0	0	0	0	0	0	0	0	0	0	0	0
	d__Bacteria;p__Firmicutes_A;c__Clostridia;o__Lachnospirales;f__Lachnospiraceae;g__KLE1615	KLE1615	0	0	0	0	0	0	0	0	0	0	1270	0	16422	7896	4386	0	0	0	309	3014	0	9675	774	0	0	0	0	0	0	0	0	0	0	0	0	0	0	1737	1628	0	0	33704	0	0	170633	0	0
	d__Bacteria;p__Proteobacteria;c__Gammaproteobacteria;o__Enterobacterales;f__Enterobacteriaceae;g__Klebsiella	Klebsiella	2022456	0	0	0	11171	643342	0	3337	139193	4671	0	0	0	0	0	209715	0	0	0	0	0	0	0	2216	44834	0	0	0	1839291	0	0	17993	733	188175	0	0	0	0	0	0	0	9158	0	0	0	27487	770
	d__Bacteria;p__Proteobacteria;c__Gammaproteobacteria;o__Enterobacterales;f__Enterobacteriaceae;g__Kluyvera	Kluyvera	9113	0	0	0	0	1949	0	0	50043	0	0	0	0	0	0	2992	0	0	0	0	0	0	0	0	1174	0	107	0	18944	0	0	216	939	4699	0	0	0	0	0	0	0	0	0	53	0	0	0
	d__Bacteria;p__Proteobacteria;c__Gammaproteobacteria;o__Enterobacterales;f__Enterobacteriaceae;g__Kosakonia	Kosakonia	195	118	0	0	47	0	94	0	1712	0	0	0	47	0	0	483	0	0	0	0	0	0	0	0	580	0	285	236	3182	0	237	358	550	1259	0	0	0	0	0	241	0	0	0	191	0	0	0
	d__Bacteria;p__Firmicutes_A;c__Clostridia;o__Lachnospirales;f__Lachnospiraceae;g__Lachnoclostridium_A	Lachnoclostridium_A	0	0	0	0	0	0	0	0	0	0	0	0	0	0	0	0	0	0	0	0	0	0	0	0	1381	0	0	0	0	0	0	0	0	0	0	273	0	0	0	0	0	83	0	0	0	2296	0
	d__Bacteria;p__Firmicutes_A;c__Clostridia;o__Lachnospirales;f__Lachnospiraceae;g__Lachnoclostridium_B	Lachnoclostridium_B	0	0	0	0	0	0	0	0	0	0	126	0	443	609	909	639	0	874	594	0	464	2618	988	0	0	0	0	0	0	0	0	0	0	0	0	0	0	2172	0	0	0	0	1272	0	0	775	0
	d__Bacteria;p__Firmicutes_A;c__Clostridia;o__Lachnospirales;f__Lachnospiraceae;g__Lachnospira	Lachnospira	0	0	0	0	0	0	0	0	0	0	736	0	18059	46844	5105	10793	2847	117	22070	52030	0	4183	150796	0	0	0	0	0	0	0	0	0	0	0	0	1194011	0	0	67229	0	0	127043	0	0	2325	0	0
	d__Bacteria;p__Firmicutes_A;c__Clostridia;o__Lachnospirales;f__Lachnospiraceae;g__Lachnotalea	Lachnotalea	0	0	0	0	0	0	0	0	0	0	0	0	0	0	0	0	0	0	0	0	0	0	0	0	0	0	0	0	0	0	0	0	0	0	0	0	0	0	0	0	0	0	0	0	0	0	0
	d__Bacteria;p__Firmicutes_A;c__Clostridia;o__Lachnospirales;f__Lachnospiraceae;g__Lacrimispora	Lacrimispora	0	0	0	0	0	0	0	0	0	0	0	0	0	0	0	0	0	0	0	0	0	0	0	0	1426	0	0	0	0	0	0	0	0	0	0	137	0	0	0	1202	0	0	0	0	0	0	0
	d__Bacteria;p__Firmicutes;c__Bacilli;o__Lactobacillales;f__Lactobacillaceae;g__Lacticaseibacillus	Lacticaseibacillus	0	0	0	7706	0	0	0	1182	19021	0	0	0	0	0	0	0	0	0	0	0	0	0	0	0	0	0	0	0	0	7173	0	0	1585	0	0	0	0	0	0	0	0	0	0	0	49378	0	0
	d__Bacteria;p__Firmicutes;c__Bacilli;o__Lactobacillales;f__Lactobacillaceae;g__Lactobacillus	Lactobacillus	0	0	194566	0	0	94984	380177	0	2295	0	0	424156	0	21	0	0	0	0	0	0	0	0	0	0	0	171701	10263	5440	0	0	0	2061701	0	0	24513	0	0	0	0	0	0	0	0	0	263045	0	0
	d__Bacteria;p__Firmicutes;c__Bacilli;o__Lactobacillales;f__Streptococcaceae;g__Lactococcus	Lactococcus	0	0	0	0	0	0	0	0	0	0	0	0	0	0	0	0	0	0	0	0	0	0	0	0	0	0	0	0	0	0	0	0	0	0	0	0	0	56812	0	0	0	0	0	0	0	0	0
	d__Bacteria;p__Actinobacteriota;c__Coriobacteriia;o__Coriobacteriales;f__Atopobiaceae;g__Lancefieldella	Lancefieldella	4177	109	103862	0	822	0	706	0	0	0	0	110	0	0	0	0	0	0	0	0	0	0	0	0	729	7168	23057	253	1866	0	0	733	102	0	0	0	0	0	0	0	0	0	0	4606	1188	0	0
	d__Bacteria;p__Firmicutes_A;c__Clostridia;o__Oscillospirales;f__Oscillospiraceae;g__Lawsonibacter	Lawsonibacter	0	0	0	0	0	0	0	0	0	0	0	0	0	3037	0	0	0	0	0	12390	1295	879	0	0	0	0	0	0	0	0	0	0	0	0	0	0	0	14428	0	0	0	376	0	0	0	8957	10842
	d__Bacteria;p__Proteobacteria;c__Gammaproteobacteria;o__Enterobacterales;f__Enterobacteriaceae;g__Lelliottia	Lelliottia	5681	3362	1679	0	3097	1351	3186	227	9777	610	0	805	1501	0	0	5546	544	337	0	0	0	0	0	490	7675	0	3704	2336	48800	345	5203	2826	6547	10569	0	575	190	0	0	1869	0	0	0	3840	376	726	0
	d__Bacteria;p__Proteobacteria;c__Gammaproteobacteria;o__Enterobacterales;f__Enterobacteriaceae;g__Leminorella	Leminorella	0	0	0	0	0	0	0	0	0	0	0	0	0	0	0	0	0	0	0	0	0	0	0	0	0	0	0	0	0	0	0	0	0	0	0	0	0	0	0	0	0	0	0	0	0	0	0
	d__Bacteria;p__Firmicutes;c__Bacilli;o__Lactobacillales;f__Lactobacillaceae;g__Ligilactobacillus	Ligilactobacillus	0	94732	0	36428	0	0	0	0	0	0	0	0	209914	0	0	0	3559	578	0	0	1649	0	0	17271	0	0	0	0	0	0	0	23	0	0	0	0	0	0	420	0	0	0	0	0	13139	0	0
	d__Bacteria;p__Actinobacteriota;c__Coriobacteriia;o__Coriobacteriales;f__Coriobacteriaceae;g__Limicola	Limicola	0	165	0	0	0	0	0	0	55	0	0	0	120	0	66	613	11	587	0	0	131	0	88	0	0	0	0	0	0	122	0	0	33	0	0	0	0	44	0	0	0	0	0	0	0	0	0
	d__Bacteria;p__Bacteroidota;c__Bacteroidia;o__Bacteroidales;f__Muribaculaceae;g__Limisoma	Limisoma	0	28141	0	0	0	0	0	0	0	0	382076	0	143645	0	0	0	0	380246	0	0	15999	0	0	0	0	0	0	0	0	0	0	0	0	0	0	0	0	0	0	0	0	0	43401	0	0	0	0
	d__Bacteria;p__Firmicutes_A;c__Clostridia;o__Lachnospirales;f__Lachnospiraceae;g__Limivivens	Limivivens	0	0	0	0	0	0	0	0	0	0	790	0	0	2299	0	0	538	0	0	0	0	0	0	0	0	0	0	0	0	1180	0	0	0	0	0	0	0	4859	2930	0	0	6634	0	0	0	0	0
	d__Bacteria;p__Firmicutes;c__Bacilli;o__Lactobacillales;f__Lactobacillaceae;g__Limosilactobacillus	Limosilactobacillus	0	0	0	12799	0	78943	0	0	128233	283950	0	330151	0	0	0	0	0	0	0	0	0	0	0	2074	0	0	0	0	0	4631	0	473255	4897	0	2591	0	0	0	238	0	0	0	84	17969	610502	0	0
	d__Bacteria;p__Proteobacteria;c__Gammaproteobacteria;o__Enterobacterales;f__Pasteurellaceae;g__Lonepinella	Lonepinella	0	115	21	0	0	0	0	0	0	0	0	0	0	0	0	0	0	0	0	0	0	0	0	0	0	10	0	0	0	0	0	0	0	0	0	0	0	0	0	21	0	0	0	0	0	0	0
	d__Bacteria;p__Firmicutes;c__Bacilli;o__Erysipelotrichales;f__Coprobacillaceae;g__Longibaculum	Longibaculum	0	0	0	0	0	0	0	0	0	0	0	0	0	0	0	0	0	0	0	0	0	0	0	0	0	0	0	0	0	0	0	0	0	0	0	0	0	0	0	0	0	0	0	0	0	0	0
	d__Bacteria;p__Firmicutes;c__Bacilli;o__Erysipelotrichales;f__Erysipelotrichaceae;g__Longicatena	Longicatena	0	0	0	0	0	0	0	0	0	0	0	0	0	0	0	0	0	0	0	0	0	0	0	0	0	0	0	0	0	0	0	0	0	0	0	0	0	0	0	0	0	0	0	0	0	0	0
	d__Bacteria;p__Firmicutes_A;c__Clostridia;o__Lachnospirales;f__Lachnospiraceae;g__Luxibacter	Luxibacter	0	0	0	0	0	0	0	0	0	0	1640	0	0	0	0	0	0	0	0	1063	0	0	619	0	0	0	0	0	0	0	0	0	0	0	0	0	0	0	0	27834	0	411	0	0	0	14477	0
	d__Bacteria;p__Bacteroidota;c__Bacteroidia;o__Bacteroidales;f__Tannerellaceae;g__Macellibacteroides	Macellibacteroides	0	182	0	0	0	0	0	0	0	0	120	0	296	381	0	0	0	30	0	181	0	1326	0	0	0	0	0	0	0	0	0	0	0	243	0	0	0	272	0	120	0	1646	0	0	0	0	0
	d__Bacteria;p__Desulfobacterota_I;c__Desulfovibrionia;o__Desulfovibrionales;f__Desulfovibrionaceae;g__Mailhella	Mailhella	0	0	0	0	0	0	0	0	0	0	0	0	0	4559	0	0	50578	0	352	0	15322	0	0	0	0	0	0	0	0	0	0	0	0	0	0	0	0	0	0	0	0	0	0	0	0	0	0
	d__Bacteria;p__Proteobacteria;c__Gammaproteobacteria;o__Enterobacterales;f__Pasteurellaceae;g__Mannheimia	Mannheimia	0	862	0	0	0	0	0	0	0	0	0	0	0	0	0	0	0	0	0	0	0	0	0	0	0	0	0	0	0	0	0	0	93	0	0	0	0	0	0	0	0	0	0	0	0	0	0
	d__Bacteria;p__Firmicutes_A;c__Clostridia;o__Oscillospirales;f__Oscillospiraceae;g__Marseille-P3106	Marseille-P3106	0	0	0	0	0	0	0	0	0	0	0	0	0	0	0	0	0	283	0	0	0	2095	0	0	239	0	0	0	0	0	0	0	0	0	0	0	310	30	0	29	0	0	0	0	0	251	0
	d__Bacteria;p__Bacteroidota;c__Bacteroidia;o__Bacteroidales;f__Tannerellaceae;g__Marseille-P3160	Marseille-P3160	0	0	0	0	0	0	0	0	0	0	0	0	0	0	0	0	0	0	0	0	0	87	0	0	0	0	0	0	0	0	0	0	0	0	0	0	0	0	0	0	0	0	0	0	0	0	0
	d__Bacteria;p__Firmicutes_A;c__Clostridia;o__Lachnospirales;f__Lachnospiraceae;g__Marvinbryantia	Marvinbryantia	0	0	0	0	0	0	0	0	0	0	0	0	0	269	0	0	0	0	0	0	0	0	362	0	0	0	0	0	0	0	0	0	0	0	0	0	0	55	0	0	0	387	0	0	0	0	0
	d__Bacteria;p__Bacteroidota;c__Bacteroidia;o__Bacteroidales;f__Tannerellaceae;g__Massilibacteroides	Massilibacteroides	0	0	0	0	0	0	0	0	0	0	0	0	11	0	0	0	0	0	0	89	0	199	0	0	0	0	0	0	0	0	0	0	0	55	0	0	0	123	0	0	0	133	0	0	0	0	0
	d__Bacteria;p__Firmicutes_A;c__Clostridia;o__Oscillospirales;f__Ruminococcaceae;g__Massilioclostridium	Massilioclostridium	0	0	0	0	0	0	0	0	0	0	0	0	0	0	0	0	0	0	0	0	0	0	0	0	0	0	0	0	0	0	0	0	0	0	0	0	0	187	0	0	0	0	0	0	0	0	0
	d__Bacteria;p__Firmicutes;c__Bacilli;o__Erysipelotrichales;f__Coprobacillaceae;g__Massiliomicrobiota	Massiliomicrobiota	0	0	0	0	0	0	0	0	0	0	0	0	0	0	0	0	0	0	0	0	0	0	0	0	0	0	0	0	0	0	0	0	0	0	0	0	0	0	0	0	0	0	0	0	0	0	0
	d__Bacteria;p__Firmicutes_A;c__Clostridia;o__Lachnospirales;f__Lachnospiraceae;g__Massilistercora	Massilistercora	0	0	0	0	0	0	0	0	0	0	0	0	0	0	0	0	0	0	0	0	0	0	0	0	0	0	0	0	0	0	0	0	0	0	0	0	69	0	0	0	0	0	0	0	0	0	0
	d__Bacteria;p__Firmicutes_A;c__Clostridia;o__Lachnospirales;f__Lachnospiraceae;g__MD308	MD308	0	0	0	0	0	0	0	0	0	0	0	0	0	0	0	0	0	0	0	0	0	0	137	0	0	0	0	0	0	0	0	0	0	0	0	0	0	0	0	0	0	0	0	0	0	121	0
	d__Bacteria;p__Firmicutes_A;c__Clostridia;o__Lachnospirales;f__Lachnospiraceae;g__Mediterraneibacter	Mediterraneibacter	0	16893	0	208	0	0	0	0	0	1546	42982	0	56289	60426	5180	10016	6098	8035	58077	3176	19696	124918	51778	619	0	0	0	0	0	1798	9111	0	0	0	0	5099	607	82024	14839	13297	8557	89204	18960	6411	51269	248031	19509
	d__Bacteria;p__Firmicutes_A;c__Clostridia;o__Lachnospirales;f__Lachnospiraceae;g__Mediterraneibacter_A	Mediterraneibacter_A	0	163	0	194	0	0	0	0	0	276	1182	0	1042	1644	0	656	0	485	1168	226	540	1214	2769	16	0	0	0	0	0	844	98	0	0	0	0	337	398	1079	454	0	0	1095	65	67	289	1814	224
	d__Bacteria;p__Firmicutes_C;c__Negativicutes;o__Selenomonadales;f__Selenomonadaceae;g__Megamonas	Megamonas	0	0	0	0	0	0	0	0	0	0	0	0	0	0	0	0	0	0	0	12465	0	0	7855	0	0	0	0	0	0	0	0	0	0	0	0	0	0	21409	0	0	0	0	0	0	0	0	0
	d__Bacteria;p__Firmicutes_C;c__Negativicutes;o__Veillonellales;f__Megasphaeraceae;g__Megasphaera	Megasphaera	0	2388671	0	118244	0	602	0	3364	418165	1687980	0	17132	1291877	0	61126	612188	423855	239138	0	48551	238647	0	23	913631	0	0	0	1588319	0	2888960	400793	102719	264447	0	0	361743	325907	0	4040	775540	3629386	0	1016783	5092496	1897083	134542	13203
	d__Bacteria;p__Firmicutes_C;c__Negativicutes;o__Veillonellales;f__Megasphaeraceae;g__Megasphaera_A	Megasphaera_A	0	189	0	41	0	0	0	0	0	122	0	0	121	0	0	0	0	0	0	0	0	0	0	0	0	0	0	0	0	390	53	0	0	0	0	0	0	0	0	312	80	0	0	0	163	0	0
	d__Bacteria;p__Firmicutes;c__Bacilli;o__Lactobacillales;f__Enterococcaceae;g__Melissococcus	Melissococcus	0	0	0	0	0	0	0	0	0	0	0	0	0	0	0	0	0	0	0	0	0	0	0	0	0	0	0	0	0	0	0	0	0	0	0	0	0	0	0	0	0	0	0	0	0	0	0
	d__Bacteria;p__Firmicutes;c__Bacilli;o__Erysipelotrichales;f__Erysipelotrichaceae;g__Merdibacter	Merdibacter	0	0	0	0	0	0	0	0	0	0	0	0	0	0	0	0	0	0	0	0	0	0	0	0	0	0	0	0	0	0	0	0	0	0	0	0	0	0	0	0	0	0	0	0	0	0	0
	d__Bacteria;p__Firmicutes_A;c__Clostridia;o__TANB77;f__CAG-508;g__Merdicola	Merdicola	0	0	0	0	0	0	0	0	0	0	0	0	0	0	0	0	0	0	0	0	0	348	0	0	0	0	0	0	0	0	0	0	0	0	0	0	0	0	0	0	0	2624	0	0	0	0	0
	d__Bacteria;p__Firmicutes_A;c__Clostridia;o__Lachnospirales;f__Lachnospiraceae;g__Merdimonas	Merdimonas	0	0	0	0	0	0	0	0	0	0	0	0	0	0	0	153	0	0	0	0	0	0	460	0	0	0	0	0	0	0	0	0	0	0	0	0	431	0	0	0	0	0	0	0	0	572	108
	d__Bacteria;p__Firmicutes_A;c__Clostridia;o__Lachnospirales;f__Lachnospiraceae;g__Merdiplasma	Merdiplasma	0	0	0	0	0	0	0	0	0	0	0	0	0	0	0	0	0	0	0	0	0	0	0	0	0	0	0	0	0	0	0	0	0	0	0	0	0	0	0	0	0	0	0	0	0	0	0
	d__Bacteria;p__Firmicutes_A;c__Clostridia;o__Lachnospirales;f__Lachnospiraceae;g__Merdisoma	Merdisoma	0	0	0	0	0	0	0	0	0	0	7839	0	0	1874	0	0	0	0	0	0	0	3837	12399	0	0	0	0	0	0	0	0	0	0	0	0	0	0	67	2112	0	0	0	0	0	0	0	0
	d__Bacteria;p__Proteobacteria;c__Gammaproteobacteria;o__Enterobacterales;f__Pasteurellaceae;g__Mesocricetibacter	Mesocricetibacter	0	65	0	0	0	0	0	0	0	0	0	65	0	0	0	0	0	0	0	0	0	0	0	0	0	0	0	0	0	0	0	0	0	0	0	0	0	0	0	0	0	0	0	0	0	0	0
	d__Bacteria;p__Proteobacteria;c__Gammaproteobacteria;o__Burkholderiales;f__Burkholderiaceae;g__Mesosutterella	Mesosutterella	0	0	0	10819	0	0	0	48303	142205	84610	0	67541	0	0	0	361907	0	0	0	0	0	0	0	160475	0	0	0	3018	0	2617	143933	149227	101477	0	0	0	0	0	13016	0	24527	0	0	18354	653886	0	0
	d__Bacteria;p__Firmicutes_A;c__Clostridia;o__Lachnospirales;f__Anaerotignaceae;g__Metalachnospira	Metalachnospira	0	0	0	0	0	0	0	0	0	0	0	0	0	1395	0	0	0	0	6125	0	0	55	0	0	0	0	0	0	0	0	0	0	0	0	0	0	0	0	0	0	0	0	0	0	0	1848	0
	d__Bacteria;p__Firmicutes;c__Bacilli;o__Erysipelotrichales;f__Coprobacillaceae;g__MGBC113645	MGBC113645	0	0	0	0	0	0	0	0	0	0	0	0	0	102	0	0	0	0	0	0	0	0	0	0	0	0	0	0	0	0	0	0	0	0	0	0	0	0	0	0	0	0	0	0	0	0	0
	d__Bacteria;p__Firmicutes;c__Bacilli;o__Erysipelotrichales;f__Coprobacillaceae;g__MGBC140090	MGBC140090	0	0	0	0	0	0	0	0	0	0	0	0	0	0	0	0	0	0	0	0	0	0	0	0	0	0	0	0	0	0	0	0	0	0	0	0	0	0	0	0	0	0	0	0	0	0	0
	d__Bacteria;p__Firmicutes;c__Bacilli;o__Erysipelotrichales;f__Coprobacillaceae;g__MGBC163490	MGBC163490	0	0	0	0	0	0	0	0	0	0	0	0	0	0	0	0	0	0	0	0	0	0	0	0	0	0	0	0	0	0	0	0	0	0	0	0	0	0	0	0	0	0	0	0	0	0	0
	d__Bacteria;p__Firmicutes_C;c__Negativicutes;o__Selenomonadales;f__Selenomonadaceae;g__Mitsuokella	Mitsuokella	0	0	0	109	0	0	0	0	0	0	0	0	0	0	1308	0	28382	2891	0	81	7596	0	0	0	0	0	0	0	0	0	0	0	0	0	0	0	0	0	133819	144451	59533	0	2386	0	0	0	0
	d__Bacteria;p__Proteobacteria;c__Gammaproteobacteria;o__Enterobacterales;f__Enterobacteriaceae;g__Mixta	Mixta	0	0	0	0	0	0	0	0	0	0	0	0	0	0	0	0	0	0	0	0	0	0	0	0	0	0	0	0	0	0	0	0	0	0	0	0	0	0	0	0	0	0	0	0	0	0	0
	d__Bacteria;p__Proteobacteria;c__Gammaproteobacteria;o__Enterobacterales;f__Enterobacteriaceae;g__Moellerella	Moellerella	0	0	0	0	0	0	0	0	633	0	0	0	0	0	0	0	0	0	0	0	0	0	0	0	0	0	0	0	0	0	0	0	0	0	0	0	0	0	0	0	0	0	0	0	0	0	0
	d__Bacteria;p__Proteobacteria;c__Gammaproteobacteria;o__Enterobacterales;f__Enterobacteriaceae;g__Moranella	Moranella	0	0	0	0	0	0	0	0	7	0	0	0	0	0	0	0	0	0	0	0	0	0	0	0	0	0	0	0	0	0	0	0	0	0	0	0	0	0	0	0	0	0	0	0	0	0	0
	d__Bacteria;p__Proteobacteria;c__Gammaproteobacteria;o__Enterobacterales;f__Enterobacteriaceae;g__Morganella	Morganella	0	0	0	0	0	0	0	0	0	0	0	0	0	0	0	0	0	0	0	0	0	0	0	0	0	0	0	0	0	0	0	0	0	0	0	0	0	0	0	0	0	0	0	0	0	0	0
	d__Bacteria;p__Firmicutes_A;c__Clostridia;o__Lachnospirales;f__Lachnospiraceae;g__Muricomes	Muricomes	0	0	0	0	0	0	0	0	0	0	0	0	0	191	1555	0	464	0	0	0	0	55	165	0	0	0	0	0	0	161	0	0	0	0	0	0	14906	36	357	0	0	0	0	0	0	1260	0
	d__Bacteria;p__Patescibacteria;c__Saccharimonadia;o__Saccharimonadales;f__Nanogingivalaceae;g__Nanogingivalis	Nanogingivalis	11914	614	4012	0	17863	0	8142	0	0	0	0	0	0	0	0	124	0	0	0	0	0	0	0	0	0	0	79605	0	0	0	0	2310	2058	0	0	47	1014	0	0	0	0	0	0	0	0	0	0
	d__Bacteria;p__Patescibacteria;c__Saccharimonadia;o__Saccharimonadales;f__Nanosynbacteraceae;g__Nanosynbacter	Nanosynbacter	0	0	0	0	0	0	0	0	0	0	0	0	0	0	0	0	0	0	0	0	0	0	0	0	0	0	0	0	0	0	0	0	0	0	0	0	0	0	0	0	0	0	0	0	0	0	0
	d__Bacteria;p__Proteobacteria;c__Gammaproteobacteria;o__Burkholderiales;f__Neisseriaceae;g__Neisseria	Neisseria	0	0	0	0	0	0	0	0	0	0	0	0	0	0	0	0	0	0	0	0	0	0	0	0	0	0	0	0	0	0	0	1040	0	0	0	0	0	0	0	0	0	0	0	508	0	0	0
	d__Bacteria;p__Firmicutes_A;c__Clostridia;o__Oscillospirales;f__Ruminococcaceae;g__Neobittarella	Neobittarella	0	0	0	0	0	0	0	0	0	0	29	0	295	0	0	0	0	0	0	0	0	216	541	0	0	0	0	0	0	0	0	0	0	0	0	0	0	132	0	0	0	278	0	0	0	1341	0
	d__Bacteria;p__Firmicutes_A;c__Clostridia;o__Oscillospirales;f__Ruminococcaceae;g__Neoruminococcus	Neoruminococcus	0	0	0	0	0	0	0	0	0	0	16	0	0	122	0	0	0	0	16	0	0	173	0	0	0	0	0	0	0	0	0	0	0	0	0	0	0	171	0	0	0	189	0	0	0	0	0
	d__Bacteria;p__Firmicutes_A;c__Clostridia;o__Lachnospirales;f__Cellulosilyticaceae;g__Niameybacter	Niameybacter	0	0	0	0	0	0	0	0	0	0	0	0	0	0	0	0	0	0	0	0	0	0	0	0	0	0	0	0	0	0	0	0	0	0	0	0	0	0	0	0	0	0	0	0	0	0	0
	d__Bacteria;p__Firmicutes_A;c__Clostridia;o__Oscillospirales;f__Oscillospiraceae;g__NSJ-51	NSJ-51	0	0	0	562	0	0	0	0	0	766	0	0	0	0	0	0	1370	3371	0	0	0	0	0	1241	4373	0	0	0	0	0	0	0	1562	0	0	0	2369	0	0	1581	0	0	0	0	0	1171	133
	d__Bacteria;p__Firmicutes_A;c__Clostridia;o__Oscillospirales;f__Oscillospiraceae;g__NSJ-62	NSJ-62	0	0	0	0	0	0	0	0	0	0	196	0	0	412	0	0	0	0	169	0	0	303	0	0	0	0	0	0	0	0	0	0	0	0	0	0	0	272	0	0	0	299	0	0	0	198	284
	d__Bacteria;p__Bacteroidota;c__Bacteroidia;o__Bacteroidales;f__Marinifilaceae;g__Odoribacter	Odoribacter	0	7558	0	0	0	0	0	0	0	0	48365	0	118505	116139	438606	0	0	72466	2784	0	1691	560738	14446	0	0	0	0	0	0	0	0	0	0	0	0	0	0	0	0	1967279	0	0	6395	0	0	26356	53480
	d__Bacteria;p__Firmicutes_A;c__Clostridia;o__Lachnospirales;f__Lachnospiraceae;g__Oliverpabstia	Oliverpabstia	0	0	0	0	0	0	0	0	0	0	1605	0	108	5021	0	0	0	0	33	0	0	239	239	0	0	0	0	0	0	74	0	0	0	0	0	0	0	24097	8698	0	0	6534	0	0	0	365	36
	d__Bacteria;p__Actinobacteriota;c__Coriobacteriia;o__Coriobacteriales;f__Atopobiaceae;g__Olsenella	Olsenella	0	0	0	0	0	0	0	0	91	36	0	0	36	0	55	146	0	0	0	0	0	0	0	0	0	0	0	0	0	0	0	0	0	0	0	0	0	0	0	0	0	0	0	0	0	0	0
	d__Bacteria;p__Actinobacteriota;c__Coriobacteriia;o__Coriobacteriales;f__Atopobiaceae;g__Olsenella_F	Olsenella_F	0	650	0	0	0	0	0	0	1112	434	0	0	623	0	404	1307	189	452	0	0	161	0	239	362	0	0	0	179	247	0	0	0	0	0	0	0	0	0	0	0	310	0	0	0	0	0	0
	d__Bacteria;p__Actinobacteriota;c__Coriobacteriia;o__Coriobacteriales;f__Atopobiaceae;g__Olsenella_G	Olsenella_G	0	64	0	0	0	0	0	0	112	16	0	0	79	0	0	177	0	16	0	0	0	0	0	0	0	0	0	0	0	0	0	0	0	0	0	0	0	0	0	0	16	0	0	0	0	0	0
	d__Bacteria;p__Actinobacteriota;c__Coriobacteriia;o__Coriobacteriales;f__Atopobiaceae;g__Olsenella_H	Olsenella_H	0	158	0	0	0	0	0	0	2735	4476	0	0	222	0	8846	1889	142	171	0	0	109	0	283	0	0	0	0	0	0	0	1205	0	0	0	0	0	0	0	0	2120	47	0	0	0	0	0	0
	d__Bacteria;p__Actinobacteriota;c__Coriobacteriia;o__Coriobacteriales;f__Atopobiaceae;g__Olsenella_I	Olsenella_I	0	95	0	0	0	0	0	0	395	146	0	0	258	0	254	547	66	133	0	0	13	0	107	27	0	0	0	0	0	0	0	0	0	0	0	0	0	0	0	0	26	0	0	0	0	0	0
	d__Bacteria;p__Bacteroidota;c__Bacteroidia;o__Bacteroidales;f__Bacteroidaceae;g__OM05-12	OM05-12	0	2033	0	34	0	0	0	766	0	0	3723	0	3622	886	4764	0	661	1572	529	6381	0	4470	3235	9457	0	0	0	0	0	0	100	0	0	2853	0	170	3198	9858	2435	11028	0	2593	0	0	0	6416	5168
	d__Bacteria;p__Firmicutes;c__Bacilli;o__RF39;f__UBA660;g__Onthousia	Onthousia	0	0	0	0	0	0	0	0	0	0	426	0	0	16163	0	0	0	0	0	0	908	0	6935	0	0	0	0	0	0	0	0	0	0	0	0	0	0	0	0	0	0	0	0	0	0	0	0
	d__Bacteria;p__Firmicutes_A;c__Clostridia;o__Oscillospirales;f__Oscillospiraceae;g__Oscillibacter	Oscillibacter	0	0	0	0	0	0	0	0	0	0	0	0	0	189	0	0	0	0	0	0	0	162	0	0	0	0	0	0	0	0	0	0	0	0	0	0	0	0	0	0	0	54	0	0	0	0	134
	d__Bacteria;p__Proteobacteria;c__Gammaproteobacteria;o__Burkholderiales;f__Burkholderiaceae;g__Oxalobacter	Oxalobacter	0	0	0	0	0	0	0	0	0	0	0	0	0	4432	0	0	0	0	0	67	0	457	2345	0	0	0	0	0	0	0	0	0	0	0	0	0	0	0	0	0	0	0	0	0	0	0	0
	d__Bacteria;p__Proteobacteria;c__Gammaproteobacteria;o__Enterobacterales;f__Enterobacteriaceae;g__Pantoea	Pantoea	2390	0	0	0	0	1378	0	0	1020	0	0	0	0	0	0	634	0	0	0	0	0	0	0	0	317	0	0	0	6539	0	0	0	19	869	0	0	0	0	0	0	0	0	0	0	0	0	0
	d__Bacteria;p__Firmicutes_A;c__Clostridia;o__Oscillospirales;f__Oscillospiraceae;g__Papillibacter	Papillibacter	0	0	0	0	0	0	0	0	0	0	0	0	0	24	0	0	0	0	0	0	0	48	0	0	0	0	0	0	0	0	0	0	0	0	0	0	0	0	0	0	0	60	0	0	0	0	24
	d__Bacteria;p__Bacteroidota;c__Bacteroidia;o__Bacteroidales;f__Tannerellaceae;g__Parabacteroides	Parabacteroides	0	197315	0	0	0	0	0	0	0	0	61418	0	166427	97185	82404	0	0	51675	31675	313191	38928	606903	84612	12	0	0	0	0	0	0	0	0	0	3554292	40016	0	0	263872	26395	9981	733	515860	2100	0	0	1355	1188
	d__Bacteria;p__Bacteroidota;c__Bacteroidia;o__Bacteroidales;f__Tannerellaceae;g__Parabacteroides_B	Parabacteroides_B	0	0	0	0	0	0	0	0	0	0	0	0	0	0	0	0	0	0	0	0	0	125	0	0	0	0	0	0	0	0	0	0	0	0	0	0	0	0	0	0	0	0	0	0	0	0	0
	d__Bacteria;p__Firmicutes_A;c__Clostridia;o__Peptostreptococcales;f__Peptostreptococcaceae;g__Paraclostridium	Paraclostridium	0	0	0	0	0	3514	0	0	0	0	0	0	0	0	0	0	0	0	0	0	0	0	0	0	0	0	0	0	0	0	0	0	0	0	0	0	0	0	0	0	0	0	0	0	0	0	0
	d__Bacteria;p__Actinobacteriota;c__Coriobacteriia;o__Coriobacteriales;f__Eggerthellaceae;g__Paraeggerthella	Paraeggerthella	0	0	0	0	0	0	0	0	1391	0	0	0	0	0	0	0	0	0	0	0	0	0	0	0	0	0	0	0	0	0	0	0	0	0	0	0	119	0	0	0	0	0	0	0	0	0	0
	d__Bacteria;p__Actinobacteriota;c__Coriobacteriia;o__Coriobacteriales;f__Atopobiaceae;g__Parafannyhessea	Parafannyhessea	0	497	0	0	0	0	0	0	1639	394	0	0	1132	0	733	2167	255	932	0	0	257	0	620	103	0	0	0	0	156	0	0	0	0	0	0	0	0	0	0	0	434	0	0	0	0	0	0
	d__Bacteria;p__Firmicutes_A;c__Clostridia;o__Lachnospirales;f__Lachnospiraceae;g__Paralachnospira	Paralachnospira	0	0	0	0	0	0	0	0	0	0	0	0	0	0	0	0	0	0	0	0	0	22	46	0	0	0	0	0	0	0	0	0	0	0	0	56	0	0	0	0	0	34	0	0	0	11	0
	d__Bacteria;p__Bacteroidota;c__Bacteroidia;o__Bacteroidales;f__Bacteroidaceae;g__Paraprevotella	Paraprevotella	0	144	0	0	0	0	0	0	0	0	414	0	314	70	316	0	0	36	0	321	0	267	370	0	0	0	0	0	0	0	0	0	0	0	0	0	0	2456	0	133	0	0	0	0	0	219	38
	d__Bacteria;p__Actinobacteriota;c__Actinomycetia;o__Actinomycetales;f__Bifidobacteriaceae;g__Parascardovia	Parascardovia	5275	1941	328	880	2526	2338	2357	434	1816	4049	0	564	861	0	1653	2938	334	1636	0	0	1047	0	20	1498	0	4873	4389	2359	3116	1571	834	653	812	0	2027	160	2430	40	200	130	3808	0	554	1179	820	489	375
	d__Bacteria;p__Proteobacteria;c__Gammaproteobacteria;o__Burkholderiales;f__Burkholderiaceae;g__Parasutterella	Parasutterella	0	0	0	0	0	0	0	0	0	0	0	0	0	0	0	0	0	0	0	0	0	0	0	0	0	0	0	0	0	0	0	0	0	0	0	0	0	0	0	0	0	0	0	0	0	0	0
	d__Bacteria;p__Actinobacteriota;c__Coriobacteriia;o__Coriobacteriales;f__Atopobiaceae;g__Paratractidigestivibacter	Paratractidigestivibacter	0	3536	0	0	0	234	0	0	214	119	0	0	32359	0	140	532	29112	5555	0	1604	970	0	52272	23	0	0	0	0	23	0	0	0	0	0	0	0	0	4109	0	0	11738	0	3108	0	0	0	0
	d__Bacteria;p__Actinobacteriota;c__Coriobacteriia;o__Coriobacteriales;f__Atopobiaceae;g__Parolsenella	Parolsenella	0	1399899	0	0	0	30523	0	0	4388120	980799	0	32562	482998	380	686039	1533300	239434	304378	0	1907	295675	4128	75623	999709	0	0	0	429027	1139379	0	0	0	0	0	2509	146422	8381	4413	0	86726	423985	0	54861	0	0	0	0
	d__Bacteria;p__Actinobacteriota;c__Coriobacteriia;o__Coriobacteriales;f__Eggerthellaceae;g__Parvibacter	Parvibacter	0	0	0	0	0	0	0	0	180	0	0	0	0	0	0	63	0	0	0	0	0	0	0	0	0	0	0	0	0	0	0	0	0	0	0	0	0	0	0	0	0	0	0	0	0	0	0
	d__Bacteria;p__Proteobacteria;c__Gammaproteobacteria;o__Enterobacterales;f__Pasteurellaceae;g__Pasteurella	Pasteurella	0	527	533	0	291	0	87	0	0	0	0	364	0	0	0	0	0	0	0	0	0	0	436	0	0	376	0	0	0	0	0	0	0	0	0	0	0	0	0	726	103	0	0	0	0	0	0
	d__Bacteria;p__Actinobacteriota;c__Actinomycetia;o__Actinomycetales;f__Actinomycetaceae;g__Pauljensenia	Pauljensenia	74951	0	12416	0	41811	2405	1995	0	948	1823	0	1819	0	0	0	2108	0	0	0	0	0	0	0	0	0	8723	64583	126	1418	0	0	0	1117	0	0	0	438	0	0	0	1261	0	0	2244	0	0	0
	d__Bacteria;p__Proteobacteria;c__Gammaproteobacteria;o__Enterobacterales;f__Enterobacteriaceae;g__PD-1	PD-1	0	0	0	0	36	0	0	0	91	0	0	0	0	0	0	73	0	0	0	0	0	0	0	0	128	0	0	0	394	0	0	108	18	164	0	0	0	0	0	0	0	0	0	0	0	0	0
	d__Bacteria;p__Firmicutes_A;c__Clostridia;o__Lachnospirales;f__Lachnospiraceae;g__Pelethocola	Pelethocola	0	0	0	0	0	0	0	0	0	0	0	0	0	0	0	0	0	0	0	0	0	186	0	0	0	0	0	0	0	0	0	0	0	0	0	0	0	0	0	0	0	47	0	0	0	0	0
	d__Bacteria;p__Firmicutes_A;c__Clostridia;o__Peptostreptococcales;f__Peptostreptococcaceae;g__Peptacetobacter	Peptacetobacter	0	0	0	0	0	0	0	0	0	0	0	0	0	0	0	0	0	0	0	0	0	0	0	0	0	0	0	0	0	0	0	0	0	0	0	0	0	0	0	0	0	0	0	0	0	0	0
	d__Bacteria;p__Firmicutes_A;c__Clostridia;o__Tissierellales;f__Peptoniphilaceae;g__Peptoniphilus_A	Peptoniphilus_A	0	0	0	0	0	219383	0	0	193	0	0	0	0	0	0	0	0	0	0	0	0	0	0	0	0	0	0	0	0	295	0	0	0	0	0	0	0	0	0	0	0	0	0	0	0	0	0
	d__Bacteria;p__Firmicutes_A;c__Clostridia;o__Peptostreptococcales;f__Peptostreptococcaceae;g__Peptostreptococcus	Peptostreptococcus	0	0	0	0	0	0	110	481	4599	0	0	0	0	0	0	0	0	0	0	0	0	0	0	0	0	0	0	0	0	0	0	0	0	0	0	0	0	0	0	0	0	0	0	0	0	0	0
	d__Bacteria;p__Firmicutes_C;c__Negativicutes;o__Acidaminococcales;f__Acidaminococcaceae;g__Phascolarctobacterium	Phascolarctobacterium	0	0	0	0	0	0	0	0	0	0	0	0	0	0	0	0	0	0	0	0	0	0	0	0	0	0	0	0	0	0	0	0	0	0	0	0	0	0	0	18967	0	0	0	0	0	0	0
	d__Bacteria;p__Firmicutes_C;c__Negativicutes;o__Acidaminococcales;f__Acidaminococcaceae;g__Phascolarctobacterium_A	Phascolarctobacterium_A	0	0	0	0	0	0	0	0	0	0	199804	0	0	129936	0	0	0	0	80965	0	2859	0	3710	10145	0	0	0	0	0	0	0	0	0	1818	0	0	3831	0	0	0	71	0	0	0	0	0	0
	d__Bacteria;p__Bacteroidota;c__Bacteroidia;o__Bacteroidales;f__Bacteroidaceae;g__Phocaeicola	Phocaeicola	0	78846	0	0	0	0	0	553	0	0	161205	4402	275650	16363	527033	0	664	54842	20301	448075	16047	205464	251843	662509	0	0	0	0	0	0	692	0	0	3703144	0	304	4471	1081927	89491	1092224	0	241524	12763	0	0	767768	1505973
	d__Bacteria;p__Bacteroidota;c__Bacteroidia;o__Bacteroidales;f__Bacteroidaceae;g__Phocaeicola_A	Phocaeicola_A	0	155	0	0	0	0	0	0	0	0	528	0	1171	167	1016	0	0	831	0	2710	0	941	176	1123	0	0	0	0	0	0	0	0	0	554	0	0	45	4928	189	2893	0	279	0	0	0	1695	2833
	d__Bacteria;p__Proteobacteria;c__Gammaproteobacteria;o__Enterobacterales;f__Enterobacteriaceae;g__Phytobacter	Phytobacter	812	71	0	0	95	305	0	0	1987	0	0	0	0	0	0	854	0	0	0	0	0	0	0	0	431	0	167	72	2802	0	48	142	143	1080	0	0	0	0	0	0	0	0	0	24	0	0	0
	d__Bacteria;p__Proteobacteria;c__Gammaproteobacteria;o__Enterobacterales;f__Enterobacteriaceae;g__Plesiomonas	Plesiomonas	460	0	0	0	0	0	0	0	1469	0	0	0	0	0	0	204	0	0	0	0	0	0	0	0	304	0	0	0	3042	0	0	0	50	673	0	0	0	0	0	0	0	0	0	0	0	0	0
	d__Bacteria;p__Proteobacteria;c__Gammaproteobacteria;o__Enterobacterales;f__Enterobacteriaceae;g__Pluralibacter	Pluralibacter	54091	750	93	0	1016	16921	416	46	8907	282	0	0	47	0	0	6908	47	0	0	0	0	0	0	608	3448	0	612	328	65475	0	1076	1357	1342	11977	0	0	0	0	0	518	0	0	0	1434	0	368	0
	d__Bacteria;p__Bacteroidota;c__Bacteroidia;o__Bacteroidales;f__Porphyromonadaceae;g__Porphyromonas	Porphyromonas	0	0	0	0	0	0	0	0	400	1409	0	0	0	0	974	0	0	0	0	0	0	38197	0	0	0	0	0	0	0	1695	3527	0	0	0	0	0	0	0	0	0	0	0	0	0	0	0	0
	d__Bacteria;p__Bacteroidota;c__Bacteroidia;o__Bacteroidales;f__Porphyromonadaceae;g__Porphyromonas_A	Porphyromonas_A	0	0	0	0	0	0	0	0	0	0	0	0	0	0	0	0	0	0	0	0	0	0	0	0	0	0	0	0	0	0	1818	0	0	0	0	0	0	0	0	0	0	0	0	0	0	0	0
	d__Bacteria;p__Bacteroidota;c__Bacteroidia;o__Bacteroidales;f__Bacteroidaceae;g__Prevotella	Prevotella	0	1026793	9184	0	5729	0	0	0	2507	5914	7107548	160874	2130821	4076797	67743	8574	226985	4000885	739559	5651903	2173487	1890432	2338120	0	0	0	6241	0	0	201842	70450	67431	1647	6266	0	99471	515560	4757138	6097184	1082045	1045082	32245	8918225	855	71854	311534	136804
	d__Bacteria;p__Proteobacteria;c__Gammaproteobacteria;o__Enterobacterales;f__Enterobacteriaceae;g__Proteus	Proteus	0	0	0	0	0	0	0	0	371836	66541	0	0	0	0	0	57361	0	0	0	0	0	0	0	0	0	0	0	0	0	0	2187	0	15317	0	0	0	0	0	0	918	0	0	0	0	21109	0	0
	d__Bacteria;p__Proteobacteria;c__Gammaproteobacteria;o__Enterobacterales;f__Enterobacteriaceae;g__Providencia	Providencia	0	0	0	0	0	0	0	0	1439	0	0	0	0	0	0	0	0	0	242	0	0	0	0	0	0	0	0	0	0	0	0	0	0	0	0	0	0	0	0	0	0	0	0	0	0	0	0
	d__Bacteria;p__Proteobacteria;c__Gammaproteobacteria;o__Enterobacterales;f__Enterobacteriaceae;g__Pseudescherichia	Pseudescherichia	0	0	0	0	0	0	0	0	0	0	0	0	0	0	0	0	0	0	0	0	0	0	0	0	0	0	0	0	188	0	0	0	0	0	0	0	0	0	0	0	0	0	0	0	0	0	0
	d__Bacteria;p__Proteobacteria;c__Gammaproteobacteria;o__Enterobacterales;f__Enterobacteriaceae;g__Pseudocitrobacter	Pseudocitrobacter	0	0	0	0	0	0	0	0	138	0	0	0	0	0	0	0	0	0	0	0	0	0	0	0	0	0	0	0	0	0	0	0	0	0	0	0	0	0	0	0	0	0	0	0	0	0	0
	d__Bacteria;p__Firmicutes_A;c__Clostridia;o__Oscillospirales;f__Oscillospiraceae;g__Pseudoflavonifractor	Pseudoflavonifractor	0	0	0	0	0	0	0	0	0	125	0	0	0	0	0	0	233	632	0	0	0	84	0	147	483	0	0	0	0	0	0	0	106	0	0	0	623	0	0	237	0	0	0	0	0	281	0
	d__Bacteria;p__Actinobacteriota;c__Actinomycetia;o__Actinomycetales;f__Bifidobacteriaceae;g__Pseudoscardovia	Pseudoscardovia	4000	4374	1204	2278	8378	5460	6236	167	4089	11119	0	1702	1852	0	5308	8401	1029	4067	0	0	2013	0	139	2946	0	2711	10000	7026	6543	2177	2424	2057	1680	0	1399	228	4791	282	702	727	9506	0	1737	3256	1695	1584	1478
	d__Bacteria;p__Firmicutes_A;c__Clostridia;o__Oscillospirales;f__Oscillospiraceae;g__Pseudoscilispira	Pseudoscilispira	0	0	0	0	0	0	0	0	0	0	586	0	0	315	0	0	0	0	784	0	106	2193	21	0	0	0	0	0	0	0	0	0	0	0	0	0	0	247	0	0	0	330	0	0	0	6702	85
	d__Bacteria;p__Firmicutes_A;c__Clostridia;o__Lachnospirales;f__Lachnospiraceae;g__Pullilachnospira	Pullilachnospira	0	0	0	0	0	0	0	0	0	0	0	0	0	0	0	0	0	0	0	0	0	0	0	0	0	0	0	0	0	0	0	0	0	0	0	0	0	0	22	0	0	22	0	0	0	129	0
	d__Bacteria;p__Firmicutes_A;c__Clostridia;o__Oscillospirales;f__Ruminococcaceae;g__Pygmaiobacter	Pygmaiobacter	0	0	0	0	0	0	0	0	0	0	53	0	0	108	0	0	107	94	213	0	0	4269	53	0	0	0	0	0	0	0	0	0	0	0	0	0	775	307	0	0	0	259	0	0	0	1593	1381
	d__Bacteria;p__Synergistota;c__Synergistia;o__Synergistales;f__Dethiosulfovibrionaceae;g__Pyramidobacter	Pyramidobacter	0	0	0	0	0	0	0	0	0	0	0	0	0	0	4240	0	0	0	0	0	0	0	0	0	0	0	0	0	0	0	0	0	0	0	0	0	0	0	0	42317	0	29313	0	0	1968	0	0
	d__Bacteria;p__Bacteroidota;c__Bacteroidia;o__Bacteroidales;f__Paludibacteraceae;g__QVMH01	QVMH01	0	0	0	0	0	0	0	0	0	0	0	0	0	0	0	0	0	0	0	0	0	0	0	0	0	0	0	0	0	0	0	0	0	0	0	0	0	31	0	0	0	0	0	0	0	0	0
	d__Bacteria;p__Actinobacteriota;c__Coriobacteriia;o__Coriobacteriales;f__Eggerthellaceae;g__QWKK01	QWKK01	0	0	0	0	0	0	0	0	1489	126	0	0	0	0	0	0	0	0	0	0	0	0	0	0	0	0	0	0	0	0	0	0	0	0	0	0	0	0	0	0	0	0	0	0	0	0	0
	d__Bacteria;p__Firmicutes_A;c__Clostridia;o__TANB77;f__CAG-508;g__RGIG8482	RGIG8482	0	0	0	0	0	0	0	0	0	0	0	0	0	0	0	0	0	0	0	0	0	93	0	0	0	0	0	0	0	0	0	0	0	0	0	0	0	0	0	0	0	18	0	0	0	0	0
	d__Bacteria;p__Proteobacteria;c__Gammaproteobacteria;o__Enterobacterales;f__Enterobacteriaceae;g__RHBSTW-00994	RHBSTW-00994	540	301	49	0	149	99	75	0	1256	0	0	0	24	0	0	498	0	0	0	0	0	0	0	0	862	0	248	225	10802	0	172	370	199	1251	0	0	0	0	0	174	0	0	0	425	0	0	0
	d__Bacteria;p__Bacteroidota;c__Bacteroidia;o__Bacteroidales;f__Rikenellaceae;g__Rikenella	Rikenella	0	0	0	0	0	0	0	0	0	0	0	0	0	0	0	0	0	0	0	0	0	40	0	0	0	0	0	0	0	3235	0	0	0	0	0	0	0	0	0	0	0	13986	0	0	0	0	0
	d__Bacteria;p__Firmicutes_A;c__Clostridia;o__Lachnospirales;f__Lachnospiraceae;g__Robinsoniella	Robinsoniella	0	0	0	0	0	0	0	0	0	0	0	0	0	0	0	0	0	0	0	0	0	0	0	0	0	0	0	0	0	0	0	0	0	0	0	0	0	0	0	0	0	0	0	0	0	0	0
	d__Bacteria;p__Proteobacteria;c__Gammaproteobacteria;o__Enterobacterales;f__Pasteurellaceae;g__Rodentibacter	Rodentibacter	0	2712	2576	0	910	0	696	0	0	0	0	1687	0	0	0	0	0	0	0	0	0	0	1393	0	0	2020	0	0	0	0	0	0	0	0	0	0	0	0	0	3038	186	0	0	0	0	0	0
	d__Bacteria;p__Proteobacteria;c__Gammaproteobacteria;o__Enterobacterales;f__Pasteurellaceae;g__Rodentibacter_A	Rodentibacter_A	0	292	181	0	10	0	0	0	0	0	0	109	0	0	0	0	0	0	0	0	0	0	0	0	0	40	0	0	0	0	0	0	0	0	0	0	0	0	0	172	0	0	0	0	0	0	0
	d__Bacteria;p__Firmicutes_A;c__Clostridia;o__Peptostreptococcales;f__Peptostreptococcaceae;g__Romboutsia	Romboutsia	0	0	0	0	0	0	0	0	0	0	0	0	0	0	0	0	0	0	0	0	0	0	0	0	0	0	0	0	0	0	0	0	0	0	0	0	0	0	0	0	0	0	0	0	0	0	0
	d__Bacteria;p__Firmicutes_A;c__Clostridia;o__Peptostreptococcales;f__Peptostreptococcaceae;g__Romboutsia_A	Romboutsia_A	0	0	0	0	0	0	0	0	0	0	0	0	0	0	0	0	0	0	0	0	0	0	0	0	0	0	0	0	0	0	0	0	0	0	0	0	0	0	0	0	0	0	0	0	0	0	0
	d__Bacteria;p__Firmicutes_A;c__Clostridia;o__Peptostreptococcales;f__Peptostreptococcaceae;g__Romboutsia_B	Romboutsia_B	0	0	0	0	0	0	0	0	0	0	0	0	0	0	0	0	0	0	0	0	0	0	0	88	0	0	0	0	0	0	0	0	0	0	0	0	0	0	0	0	0	0	0	0	0	0	0
	d__Bacteria;p__Firmicutes_A;c__Clostridia;o__Peptostreptococcales;f__Peptostreptococcaceae;g__Romboutsia_C	Romboutsia_C	0	0	0	0	0	0	0	0	0	0	0	0	0	0	0	0	0	0	0	0	0	0	0	0	0	0	0	0	0	0	0	0	0	0	0	0	0	0	0	0	0	0	0	0	0	0	0
	d__Bacteria;p__Firmicutes_A;c__Clostridia;o__Peptostreptococcales;f__Peptostreptococcaceae;g__Romboutsia_D	Romboutsia_D	0	0	0	0	0	0	0	0	0	0	0	0	0	0	0	0	0	0	0	0	0	0	0	0	0	0	0	0	0	0	0	0	0	0	0	0	0	0	0	0	0	0	0	0	0	0	0
	d__Bacteria;p__Firmicutes_A;c__Clostridia;o__Lachnospirales;f__Lachnospiraceae;g__Roseburia	Roseburia	0	0	0	0	0	0	0	0	0	0	107468	0	51809	114530	12361	0	0	0	273699	210280	34031	110854	1502360	0	0	0	0	0	0	0	0	0	0	0	0	455520	0	95842	57759	24355	0	180793	0	0	0	0	0
	d__Bacteria;p__Actinobacteriota;c__Actinomycetia;o__Actinomycetales;f__Micrococcaceae;g__Rothia	Rothia	289045	17012	688677	0	40532	155	30484	1285	0	299	0	6289	0	0	0	0	0	0	0	0	0	0	0	0	39051	57480	196319	9782	1095	0	0	16077	14124	1697	146	0	0	0	0	0	15228	0	0	41023	896	0	0
	d__Bacteria;p__Proteobacteria;c__Gammaproteobacteria;o__Enterobacterales;f__Enterobacteriaceae;g__Rouxiella	Rouxiella	410	0	0	0	0	204	0	0	223	0	0	0	0	0	0	204	0	0	0	0	0	0	0	0	0	0	0	0	2165	0	0	0	0	287	0	0	0	0	0	0	0	0	0	0	0	0	0
	d__Bacteria;p__Actinobacteriota;c__Coriobacteriia;o__Coriobacteriales;f__Eggerthellaceae;g__Rubneribacter	Rubneribacter	0	0	0	0	0	0	0	0	4669	812	0	0	0	0	0	263	595	0	0	0	0	0	0	522	0	0	0	0	0	448	0	0	0	0	0	0	1385	0	0	0	0	0	0	0	270	0	0
	d__Bacteria;p__Firmicutes_A;c__Clostridia;o__Lachnospirales;f__Lachnospiraceae;g__RUG11200	RUG11200	0	0	0	0	0	0	0	0	0	0	0	0	0	1232	0	0	0	0	0	186	0	466	1325	0	0	0	0	0	0	0	0	0	0	0	0	1418	0	0	251	0	0	782	0	0	0	0	0
	d__Bacteria;p__Firmicutes_A;c__Clostridia;o__Lachnospirales;f__Lachnospiraceae;g__RUG115	RUG115	0	0	0	0	0	0	0	0	0	0	29382	0	95264	41110	0	0	0	0	38250	10189	0	1232	561546	0	0	0	0	0	0	0	0	0	0	0	0	194	0	0	3410	0	0	34480	0	0	0	0	0
	d__Bacteria;p__Firmicutes_A;c__Clostridia;o__Oscillospirales;f__Ruminococcaceae;g__Ruminiclostridium_E	Ruminiclostridium_E	0	0	0	0	0	0	0	0	0	0	0	0	0	10567	0	0	0	0	730	0	0	14084	0	0	0	0	0	0	0	0	0	0	0	0	0	0	0	0	0	0	0	22599	0	0	0	0	0
	d__Bacteria;p__Firmicutes_A;c__Clostridia;o__Lachnospirales;f__Lachnospiraceae;g__Ruminococcus_B	Ruminococcus_B	0	21930	0	116378	0	0	0	0	0	84849	0	0	1790	177	0	0	0	0	0	436	0	20091	1246	4697	0	0	0	0	0	147027	25852	0	0	0	0	42609	1263	431	0	0	0	0	0	10283	8675	7649	7090
	d__Bacteria;p__Firmicutes_A;c__Clostridia;o__Oscillospirales;f__Ruminococcaceae;g__Ruminococcus_C	Ruminococcus_C	0	0	0	0	0	0	0	0	0	0	7302	0	43357	3329	19052	0	0	0	0	0	1106	6699	0	0	0	0	0	0	0	0	0	0	0	0	0	0	0	0	0	0	0	18383	0	0	0	0	0
	d__Bacteria;p__Firmicutes_A;c__Clostridia;o__Oscillospirales;f__Ruminococcaceae;g__Ruminococcus_D	Ruminococcus_D	0	0	0	0	0	0	0	0	0	0	0	0	0	0	0	0	0	0	0	31589	0	8745	0	0	0	0	0	0	0	0	0	0	0	0	0	1264	0	0	0	0	0	170047	0	0	0	0	0
	d__Bacteria;p__Firmicutes_A;c__Clostridia;o__Oscillospirales;f__Acutalibacteraceae;g__Ruminococcus_E	Ruminococcus_E	0	0	0	0	0	0	0	0	0	0	14443	0	245	23103	0	0	0	0	1586	37035	5721	0	0	0	0	0	0	0	0	0	0	0	0	0	0	0	0	77270	98435	0	0	28551	0	0	0	0	12607
	d__Bacteria;p__Firmicutes_A;c__Clostridia;o__Lachnospirales;f__Lachnospiraceae;g__Ruminococcus_G	Ruminococcus_G	0	0	0	0	0	0	0	0	0	0	0	0	0	0	0	0	0	0	0	0	0	0	0	0	0	0	0	0	0	0	0	0	0	0	0	0	0	0	0	0	0	0	0	0	0	0	0
	d__Bacteria;p__Firmicutes_A;c__Clostridia;o__Oscillospirales;f__Ruminococcaceae;g__Ruthenibacterium	Ruthenibacterium	0	0	0	10587	0	0	0	0	0	0	0	0	478	2085	0	0	158517	26034	2450	0	0	1474	0	0	0	0	0	0	0	0	0	0	0	0	0	0	539981	7792	2708	15614	0	4775	0	0	0	4320	6177
	d__Bacteria;p__Proteobacteria;c__Gammaproteobacteria;o__Enterobacterales;f__Enterobacteriaceae;g__Salmonella	Salmonella	0	0	0	0	0	0	0	0	1170	0	0	0	0	0	0	0	0	0	0	0	0	0	0	0	0	0	166	0	561	0	91	636	0	1578	0	0	0	0	0	233	0	0	0	324	0	0	0
	d__Bacteria;p__Proteobacteria;c__Gammaproteobacteria;o__Enterobacterales;f__Enterobacteriaceae;g__Scandinavium	Scandinavium	2287	681	395	0	816	455	763	0	3636	247	0	163	145	0	0	1828	249	0	0	0	0	0	0	0	1519	0	965	786	8200	0	1260	793	1322	3657	0	84	0	0	0	433	0	0	0	1487	0	0	0
	d__Bacteria;p__Proteobacteria;c__Alphaproteobacteria;o__RF32;f__CAG-239;g__Scatocola	Scatocola	0	0	0	0	0	0	0	0	0	0	0	0	0	0	0	0	0	0	0	0	0	0	0	0	0	0	0	0	0	0	0	0	0	0	0	0	0	0	0	0	0	0	0	0	0	0	0
	d__Bacteria;p__Firmicutes_A;c__Clostridia;o__Christensenellales;f__Borkfalkiaceae;g__Scatosoma	Scatosoma	0	0	0	0	0	0	0	0	0	0	0	0	0	0	0	0	0	0	0	0	0	0	0	0	0	0	0	0	0	0	0	0	0	0	0	0	0	0	0	0	0	0	0	0	0	0	0
	d__Bacteria;p__Firmicutes_A;c__Clostridia;o__Lachnospirales;f__Lachnospiraceae;g__Schaedlerella	Schaedlerella	0	1467	0	274	0	0	0	0	0	347	5786	0	5954	3823	183	2363	0	2308	472	719	2311	6041	7626	0	0	0	0	0	0	1726	213	0	0	0	0	693	77	2716	2148	0	200	7788	2537	0	4417	60894	783
	d__Bacteria;p__Firmicutes_A;c__Clostridia;o__Oscillospirales;f__Acutalibacteraceae;g__Scybalenecus	Scybalenecus	0	0	0	0	0	0	0	0	0	0	0	0	0	80	0	0	0	0	0	0	0	0	0	0	0	0	0	0	0	0	0	0	0	0	0	0	0	0	0	0	0	0	0	0	0	0	0
	d__Bacteria;p__Firmicutes_C;c__Negativicutes;o__Selenomonadales;f__Selenomonadaceae;g__Selenomonas_A	Selenomonas_A	0	0	0	0	0	0	0	0	0	0	0	0	0	0	0	0	0	0	0	0	0	0	0	0	0	0	0	0	0	0	0	0	0	0	0	0	0	0	803	1306	198	0	0	0	0	0	0
	d__Bacteria;p__Firmicutes_C;c__Negativicutes;o__Selenomonadales;f__Selenomonadaceae;g__Selenomonas_B	Selenomonas_B	0	0	0	0	0	0	0	0	0	0	0	0	0	0	0	0	0	0	0	0	0	0	0	0	0	0	0	0	0	0	0	0	0	0	0	0	0	0	178	296	180	0	0	0	0	0	0
	d__Bacteria;p__Firmicutes_A;c__Clostridia;o__Lachnospirales;f__Lachnospiraceae;g__Sellimonas	Sellimonas	0	0	0	57241	0	0	0	0	0	0	186	0	189	172	0	99	0	0	12	0	0	149	468	0	0	0	0	0	0	364	0	0	0	0	0	100	89	194	25	0	0	187	0	0	0	43016	22824
	d__Bacteria;p__Actinobacteriota;c__Coriobacteriia;o__Coriobacteriales;f__Eggerthellaceae;g__Senegalimassilia	Senegalimassilia	0	24647	0	0	0	0	0	0	0	0	0	0	9955	625	25990	0	0	3223	0	0	2665	5003	1133	0	0	0	0	626	0	0	13824	0	0	0	0	7674	0	6538	0	0	30293	0	9877	0	0	0	0
	d__Bacteria;p__Proteobacteria;c__Gammaproteobacteria;o__Enterobacterales;f__Enterobacteriaceae;g__Serratia	Serratia	723	56	0	0	0	360	0	0	1032	110	0	0	0	0	0	582	0	0	0	0	0	0	0	0	330	0	55	55	2861	0	27	245	222	1091	0	0	0	0	0	138	0	0	0	27	0	0	0
	d__Bacteria;p__Proteobacteria;c__Gammaproteobacteria;o__Enterobacterales;f__Enterobacteriaceae;g__Serratia_F	Serratia_F	0	0	0	0	0	0	0	0	0	0	0	0	0	0	0	0	0	0	0	0	0	0	0	0	0	0	0	0	49	0	0	0	0	0	0	0	0	0	0	0	0	0	0	0	0	0	0
	d__Bacteria;p__Proteobacteria;c__Gammaproteobacteria;o__Enterobacterales;f__Enterobacteriaceae;g__Serratia_G	Serratia_G	0	0	0	0	0	0	0	0	124	0	0	0	0	0	0	0	0	0	0	0	0	0	0	0	0	0	0	0	0	0	0	0	0	0	0	0	0	0	0	0	0	0	0	0	0	0	0
	d__Bacteria;p__Proteobacteria;c__Gammaproteobacteria;o__Enterobacterales;f__Enterobacteriaceae;g__Serratia_H	Serratia_H	0	0	0	0	0	0	0	0	205	0	0	0	0	0	0	0	0	0	0	0	0	0	0	0	0	0	0	0	185	0	0	0	0	0	0	0	0	0	0	0	0	0	0	0	0	0	0
	d__Bacteria;p__Firmicutes_A;c__Clostridia;o__Oscillospirales;f__Ruminococcaceae;g__SFJ001	SFJ001	0	0	0	0	0	0	0	0	0	0	338	0	0	6314	0	0	0	0	139	69	134	1173	516	0	0	0	0	0	0	0	0	0	0	0	0	0	69	1094	234	0	0	511	0	0	0	137	0
	d__Bacteria;p__Proteobacteria;c__Gammaproteobacteria;o__Enterobacterales;f__Enterobacteriaceae;g__Shimwellia	Shimwellia	4717	431	146	0	704	1575	463	0	2485	297	0	0	280	0	0	1501	38	0	0	0	0	0	0	0	1907	0	525	507	7810	0	615	611	785	2979	0	0	0	0	0	168	0	0	0	692	0	0	0
	d__Bacteria;p__Proteobacteria;c__Gammaproteobacteria;o__Enterobacterales;f__Enterobacteriaceae;g__Siccibacter	Siccibacter	5027	24	0	0	0	1871	0	0	1703	0	0	0	0	0	0	1383	0	0	0	0	0	0	0	0	516	0	0	0	11435	0	0	0	123	2212	0	0	0	0	0	0	0	0	0	0	0	0	0
	d__Bacteria;p__Actinobacteriota;c__Coriobacteriia;o__Coriobacteriales;f__Eggerthellaceae;g__Slackia	Slackia	0	0	0	0	0	0	0	0	15	0	0	0	0	0	0	0	0	0	0	0	0	0	0	0	0	0	0	0	0	0	0	0	0	0	0	0	0	0	0	0	15	0	0	0	0	0	0
	d__Bacteria;p__Actinobacteriota;c__Coriobacteriia;o__Coriobacteriales;f__Eggerthellaceae;g__Slackia_A	Slackia_A	0	0	0	0	0	0	0	0	160	61	0	2072	350	0	1377	48	0	0	0	0	0	0	5655	0	0	0	0	0	0	12	0	0	0	0	0	0	0	0	5314	0	2168	0	4171	0	0	0	0
	d__Bacteria;p__Proteobacteria;c__Gammaproteobacteria;o__Enterobacterales;f__Enterobacteriaceae;g__Sodalis_A	Sodalis_A	303	0	0	0	0	101	0	0	249	0	0	0	0	0	0	201	0	0	0	0	0	0	0	0	0	0	0	0	1659	0	0	0	0	252	0	0	0	0	0	0	0	0	0	0	0	0	0
	d__Bacteria;p__Firmicutes;c__Bacilli;o__Staphylococcales;f__Staphylococcaceae;g__Staphylococcus	Staphylococcus	95217	0	374786	0	0	4319	3764	0	0	0	0	0	0	0	0	0	0	0	0	0	0	0	0	0	0	26650	10898	0	0	0	3438	3020	0	0	0	0	0	0	0	0	9068	0	0	0	0	0	0
	d__Bacteria;p__Cyanobacteria;c__Vampirovibrionia;o__Gastranaerophilales;f__Gastranaerophilaceae;g__Stercorousia	Stercorousia	0	0	0	0	0	0	0	0	0	0	94350	0	0	53194	0	0	0	0	0	0	67793	0	0	0	0	0	0	0	0	0	0	0	0	0	0	0	0	36946	0	0	0	0	0	0	0	0	0
	d__Bacteria;p__Firmicutes;c__Bacilli;o__Erysipelotrichales;f__Coprobacillaceae;g__Stoquefichus	Stoquefichus	0	0	0	0	0	0	0	0	0	0	0	0	0	0	0	0	112	0	0	0	0	0	0	0	0	0	0	0	0	0	0	0	0	0	0	0	0	0	0	0	0	0	0	0	0	0	0
	d__Bacteria;p__Firmicutes;c__Bacilli;o__Lactobacillales;f__Streptococcaceae;g__Streptococcus	Streptococcus	617627	253438	4017970	13386	161638	254950	1112457	31685	266034	58614	579	318794	52728	17464	21568	201566	9285	28306	991	1557	9765	14857	34517	40249	266255	109643	946774	102333	89625	76715	19577	1053054	100270	11996	50691	53937	17685	0	9853	1042	189523	25	30067	1284609	116532	2434	0
	d__Bacteria;p__Proteobacteria;c__Gammaproteobacteria;o__Enterobacterales;f__Succinivibrionaceae;g__Succinivibrio	Succinivibrio	0	0	0	0	0	0	0	0	0	0	0	0	0	5982	0	0	0	0	0	0	0	125348	0	0	0	0	0	0	0	0	0	0	0	0	0	0	0	2289	0	0	0	0	356	0	0	0	0
	d__Bacteria;p__Proteobacteria;c__Gammaproteobacteria;o__Enterobacterales;f__Enterobacteriaceae;g__Superficieibacter	Superficieibacter	10515	2120	729	0	1609	2737	1770	184	7546	520	0	427	778	0	0	4553	656	384	0	0	0	0	0	300	6582	0	2782	2536	19854	206	2764	3161	3220	8182	0	351	203	0	0	2187	0	0	0	4182	0	37	0
	d__Bacteria;p__Proteobacteria;c__Gammaproteobacteria;o__Burkholderiales;f__Burkholderiaceae;g__Sutterella	Sutterella	0	72581	0	0	0	4174109	0	0	0	0	0	0	17272	0	2829	0	0	17427	0	2200	8349	0	7234	0	0	0	0	0	0	0	0	0	0	0	0	171585	50074	12475	0	411823	0	0	0	0	0	2685	1083
	d__Bacteria;p__Proteobacteria;c__Gammaproteobacteria;o__Enterobacterales;f__Enterobacteriaceae;g__SZZW01	SZZW01	0	11	0	0	0	0	0	0	185	0	0	0	0	0	0	11	0	0	0	0	0	0	0	0	68	0	0	0	170	0	11	0	0	140	0	0	0	0	0	11	0	0	0	35	0	0	0
	d__Bacteria;p__Bacteroidota;c__Bacteroidia;o__Bacteroidales;f__Tannerellaceae;g__Tannerella	Tannerella	0	0	0	0	0	0	0	0	0	0	0	0	0	0	45	0	0	0	0	0	0	89	0	0	0	0	0	0	0	0	0	0	0	0	0	0	0	23	0	0	0	0	0	0	0	0	0
	d__Bacteria;p__Proteobacteria;c__Gammaproteobacteria;o__Enterobacterales;f__Enterobacteriaceae;g__Tatumella	Tatumella	0	0	0	0	0	0	0	0	156	0	0	0	0	0	0	0	0	0	0	0	0	0	0	0	70	0	0	0	282	0	0	0	0	111	0	0	0	0	0	0	0	0	0	0	0	0	0
	d__Bacteria;p__Firmicutes_A;c__Clostridia;o__Peptostreptococcales;f__Peptostreptococcaceae;g__Terrisporobacter	Terrisporobacter	0	0	0	0	0	0	0	0	0	0	0	0	0	0	0	0	0	0	0	0	0	5954	656	0	0	0	0	0	0	0	0	0	0	0	0	0	0	1100	0	0	0	0	0	0	0	0	0
	d__Bacteria;p__Actinobacteriota;c__Coriobacteriia;o__Coriobacteriales;f__Atopobiaceae;g__Thermophilibacter	Thermophilibacter	0	1261	0	0	0	0	0	0	2134	1189	0	0	2783	0	506	2046	1902	835	0	0	391	0	2393	1283	0	0	0	57	930	0	0	0	0	0	0	0	0	108	0	38	1230	0	27	0	0	0	0
	d__Bacteria;p__Proteobacteria;c__Gammaproteobacteria;o__Enterobacterales;f__Enterobacteriaceae;g__Trabulsiella	Trabulsiella	0	0	0	0	0	0	0	0	453	0	0	0	0	0	0	332	0	0	0	0	0	0	0	0	123	0	0	0	1627	0	0	0	0	204	0	0	0	0	0	0	0	0	0	0	0	0	0
	d__Bacteria;p__Firmicutes;c__Bacilli;o__Haloplasmatales_A;f__Turicibacteraceae;g__Turicibacter	Turicibacter	0	0	0	0	0	0	0	0	0	0	0	0	0	0	0	0	0	0	0	0	0	0	0	0	0	0	0	0	0	0	0	0	0	0	0	0	0	0	0	0	0	0	0	0	0	0	0
	d__Bacteria;p__Firmicutes_A;c__Clostridia;o__Lachnospirales;f__Lachnospiraceae;g__TWA4	TWA4	0	0	0	0	0	0	0	0	0	0	0	0	0	0	0	0	0	0	0	0	0	0	0	0	0	0	0	0	0	0	0	0	0	0	0	0	0	0	0	0	0	0	0	0	0	0	0
	d__Bacteria;p__Firmicutes_A;c__Clostridia;o__Christensenellales;f__CAG-74;g__UBA11524	UBA11524	0	0	0	0	0	0	0	0	0	0	2732	0	0	3556	0	0	0	0	0	0	0	0	0	0	0	0	0	0	0	0	0	0	0	0	0	0	0	0	0	0	0	0	0	0	0	0	0
	d__Bacteria;p__Firmicutes_A;c__Clostridia;o__Lachnospirales;f__Lachnospiraceae;g__UBA11774	UBA11774	0	0	0	0	0	0	0	0	0	0	169	0	0	1431	0	0	0	0	0	0	0	170	4379	0	0	0	0	0	0	0	0	0	0	0	0	0	0	0	0	0	0	4286	0	0	0	0	0
	d__Bacteria;p__Cyanobacteria;c__Vampirovibrionia;o__Gastranaerophilales;f__Gastranaerophilaceae;g__UBA1221	UBA1221	0	0	0	0	0	0	0	0	0	0	1251	0	0	372	0	0	0	0	0	0	0	0	0	0	0	0	0	0	0	0	0	0	0	0	0	0	0	0	0	0	0	0	0	0	0	0	0
	d__Bacteria;p__Actinobacteriota;c__Coriobacteriia;o__Coriobacteriales;f__Atopobiaceae;g__UBA1367	UBA1367	0	0	0	0	0	0	0	0	54	0	0	0	83	0	0	27	0	0	0	0	0	0	0	0	0	0	0	0	0	0	0	0	0	0	0	0	0	0	0	0	0	0	0	0	0	0	0
	d__Bacteria;p__Firmicutes_A;c__Clostridia;o__Oscillospirales;f__Acutalibacteraceae;g__UBA1417	UBA1417	0	0	0	0	0	0	0	0	0	0	2999	0	0	49239	20951	0	0	0	31787	1570	412	87851	535	0	0	0	0	0	0	0	0	0	0	0	0	0	0	12398	6845	0	0	89449	0	0	0	37791	15286
	d__Bacteria;p__Firmicutes_A;c__Clostridia;o__Lachnospirales;f__Lachnospiraceae;g__UBA2821	UBA2821	0	0	0	0	0	0	0	0	0	0	0	0	0	370	0	0	0	0	0	0	0	44	221	0	0	0	0	0	0	0	0	0	0	0	0	293	0	0	33	0	0	88	0	0	0	0	0
	d__Bacteria;p__Firmicutes_A;c__Clostridia;o__Lachnospirales;f__Lachnospiraceae;g__UBA2882	UBA2882	0	0	0	0	0	0	0	0	0	0	15	0	0	0	0	0	0	0	182	0	0	30	91	0	0	0	0	0	0	0	0	0	0	0	0	0	0	0	0	0	0	265	0	0	0	0	0
	d__Bacteria;p__Firmicutes_C;c__Negativicutes;o__Selenomonadales;f__Selenomonadaceae;g__UBA2897	UBA2897	0	0	0	0	0	0	0	0	0	0	0	0	0	0	0	0	49	0	0	0	0	0	0	0	0	0	0	0	0	0	0	0	0	0	0	0	0	0	984	1655	1457	0	0	0	0	0	0
	d__Bacteria;p__Bacteroidota;c__Bacteroidia;o__Bacteroidales;f__Bacteroidaceae;g__UBA2918	UBA2918	0	0	0	0	0	0	0	0	0	0	189	0	0	0	0	0	0	0	0	145	0	73	0	0	0	0	0	0	0	0	0	0	0	0	0	0	0	462	0	233	0	0	0	0	0	136	0
	d__Bacteria;p__Firmicutes_A;c__Clostridia;o__Lachnospirales;f__Lachnospiraceae;g__UBA3282	UBA3282	0	0	0	0	0	0	0	0	0	0	103	0	0	0	0	0	0	0	78	0	0	0	0	0	0	0	0	0	0	0	0	0	0	0	0	0	0	0	0	0	0	26	0	0	0	0	0
	d__Bacteria;p__Firmicutes_A;c__Clostridia;o__Lachnospirales;f__Lachnospiraceae;g__UBA3402	UBA3402	0	0	0	0	0	0	0	0	0	0	1905	0	0	4427	0	0	0	0	0	0	0	0	3060	0	0	0	0	0	0	0	0	0	0	0	0	0	0	0	2721	0	0	4762	0	0	0	0	0
	d__Bacteria;p__Firmicutes_C;c__Negativicutes;o__Selenomonadales;f__Selenomonadaceae;g__UBA3796	UBA3796	0	0	0	0	0	0	0	0	0	0	0	0	0	0	0	0	0	0	0	0	0	0	0	0	0	0	0	0	0	0	0	0	0	0	0	0	0	0	202	327	99	0	0	0	0	0	0
	d__Bacteria;p__Bacteroidota;c__Bacteroidia;o__Bacteroidales;f__Bacteroidaceae;g__UBA3839	UBA3839	0	0	0	0	0	0	0	0	0	0	40	0	0	40	0	0	0	111	0	0	0	0	0	0	0	0	0	0	0	0	0	0	0	0	0	0	0	26	40	0	0	0	40	0	0	0	0
	d__Bacteria;p__Bacteroidota;c__Bacteroidia;o__Bacteroidales;f__Bacteroidaceae;g__UBA4334	UBA4334	0	0	0	0	0	0	0	0	0	0	0	0	0	85	0	0	0	84	0	0	0	0	0	0	0	0	0	0	0	0	0	0	0	0	0	0	0	65	0	0	0	0	42	0	0	0	0
	d__Bacteria;p__Bacteroidota;c__Bacteroidia;o__Bacteroidales;f__Bacteroidaceae;g__UBA4372	UBA4372	0	0	0	0	0	0	0	0	0	0	280	0	236	417	0	0	0	407	0	25	51	63	0	0	0	0	0	0	0	0	0	0	0	0	0	0	0	306	51	0	0	0	305	0	0	0	0
	d__Bacteria;p__Firmicutes_A;c__Clostridia;o__Oscillospirales;f__Butyricicoccaceae;g__UBA4644	UBA4644	0	0	0	0	0	0	0	0	0	0	107	0	0	879	0	0	0	0	0	0	0	189	0	0	0	0	0	0	0	0	0	0	0	0	0	0	0	0	0	0	0	0	0	0	0	0	0
	d__Bacteria;p__Firmicutes_A;c__Clostridia;o__UBA1381;f__UBA1381;g__UBA4716	UBA4716	0	0	0	0	0	0	0	0	0	0	0	0	0	0	0	0	0	0	0	0	0	0	0	0	0	0	0	0	0	0	0	0	0	0	0	29	0	0	0	0	0	0	0	0	0	0	0
	d__Bacteria;p__Firmicutes_A;c__Clostridia;o__Oscillospirales;f__Acutalibacteraceae;g__UBA5905	UBA5905	0	0	0	0	0	0	0	0	0	0	0	0	0	135	0	0	0	0	0	0	0	156	0	0	0	0	0	0	0	0	0	0	0	0	0	0	0	0	0	0	0	0	0	0	0	0	0
	d__Bacteria;p__Firmicutes_A;c__Clostridia;o__Christensenellales;f__Borkfalkiaceae;g__UBA7597	UBA7597	0	0	0	0	0	0	0	0	0	0	13079	0	0	23274	0	0	0	0	0	0	0	1594	0	0	0	0	0	0	0	0	0	0	0	0	0	0	0	0	0	0	0	0	0	0	0	0	0
	d__Bacteria;p__Actinobacteriota;c__Coriobacteriia;o__Coriobacteriales;f__Atopobiaceae;g__UBA7741	UBA7741	0	1031	0	0	0	0	0	0	3831	748	0	0	666	0	402	1460	316	296	0	0	309	0	138	543	0	0	0	165	496	0	0	0	0	0	0	55	0	0	0	110	313	0	0	0	0	0	0
	d__Bacteria;p__Actinobacteriota;c__Coriobacteriia;o__Coriobacteriales;f__Atopobiaceae;g__UBA7748	UBA7748	0	175	0	0	0	0	0	0	294	270	0	0	210	0	199	535	127	222	0	0	153	0	103	58	0	0	0	0	105	0	0	0	0	0	0	0	23	0	0	46	186	0	23	0	0	0	0
	d__Bacteria;p__Firmicutes_A;c__Clostridia;o__Lachnospirales;f__Anaerotignaceae;g__UBA8514	UBA8514	0	0	0	0	0	0	0	0	0	0	0	0	0	0	0	0	0	0	0	0	0	0	0	0	0	0	0	0	0	0	0	0	0	0	0	0	0	0	0	0	0	0	0	0	0	1183	0
	d__Bacteria;p__Firmicutes_A;c__Clostridia;o__Lachnospirales;f__Lachnospiraceae;g__UBA9414	UBA9414	0	0	0	0	0	0	0	0	0	0	330	0	326	437	0	93	0	0	0	0	0	199	563	0	0	0	0	0	0	778	0	0	0	0	0	16	0	252	181	0	0	252	0	0	30	406	0
	d__Bacteria;p__Firmicutes_A;c__Clostridia;o__Oscillospirales;f__Acutalibacteraceae;g__UMGS1071	UMGS1071	0	0	0	0	0	0	0	0	0	0	0	0	0	0	275	19362	0	0	0	0	0	0	308	0	0	0	0	0	0	0	0	0	0	0	0	0	0	3632	0	0	0	852	0	0	0	0	975
	d__Bacteria;p__Firmicutes_A;c__Clostridia;o__Lachnospirales;f__Lachnospiraceae;g__UMGS1375	UMGS1375	0	0	0	0	0	0	0	0	0	0	8681	0	0	3184	0	0	0	0	0	0	0	0	0	0	0	0	0	0	0	0	0	0	0	0	0	0	0	0	0	0	0	8179	0	0	0	0	0
	d__Bacteria;p__Firmicutes_A;c__Clostridia;o__Oscillospirales;f__Acutalibacteraceae;g__UMGS1591	UMGS1591	0	0	0	0	0	0	0	0	0	0	0	0	0	0	0	0	0	0	0	0	0	0	0	0	0	0	0	0	0	0	0	0	0	0	0	0	0	0	0	0	0	664	0	0	0	0	0
	d__Bacteria;p__Firmicutes_A;c__Clostridia;o__TANB77;f__CAG-508;g__UMGS1663	UMGS1663	0	0	0	0	0	0	0	0	0	0	0	0	0	10705	0	0	0	0	0	0	0	0	0	0	0	0	0	0	0	0	0	0	0	0	0	0	0	11157	0	0	0	111	0	0	0	0	0
	d__Bacteria;p__Firmicutes_A;c__Clostridia;o__Oscillospirales;f__Oscillospiraceae;g__UMGS1766	UMGS1766	0	0	0	0	0	0	0	0	0	0	0	0	0	2483	0	0	0	0	0	0	0	0	0	0	0	0	0	0	0	0	0	0	0	0	0	0	0	138	0	0	0	56	0	0	0	0	0
	d__Bacteria;p__Firmicutes_A;c__Clostridia;o__TANB77;f__CAG-508;g__UMGS1901	UMGS1901	0	0	0	0	0	0	0	0	0	0	0	0	0	706	0	0	0	0	0	0	0	363	0	0	0	0	0	0	0	0	0	0	0	0	0	0	0	0	0	0	0	0	0	0	0	0	0
	d__Bacteria;p__Firmicutes_A;c__Clostridia;o__Lachnospirales;f__Lachnospiraceae;g__UMGS2037	UMGS2037	0	0	0	0	0	0	0	0	0	0	174683	0	0	161	0	0	0	0	35767	0	0	0	0	0	0	0	0	0	0	136	0	0	0	0	0	0	0	0	0	0	0	26	0	0	0	0	0
	d__Bacteria;p__Bacteroidota;c__Bacteroidia;o__Bacteroidales;f__Barnesiellaceae;g__UMGS27	UMGS27	0	0	0	0	0	0	0	0	0	0	0	0	0	0	543	0	0	0	0	0	0	73	0	0	0	0	0	0	0	0	0	0	0	0	0	0	0	0	0	0	0	0	0	0	0	0	0
	d__Bacteria;p__Firmicutes_A;c__Clostridia;o__Oscillospirales;f__Acutalibacteraceae;g__UMGS856	UMGS856	0	0	0	0	0	0	0	0	0	0	0	0	0	750	0	0	0	0	307	0	0	158	0	0	0	0	0	0	0	0	0	0	0	0	0	0	0	0	0	0	0	0	0	0	0	0	107
	d__Bacteria;p__Bacteroidota;c__Bacteroidia;o__Bacteroidales;f__Tannerellaceae;g__unknown	unknown	0	1427	0	0	0	0	0	0	0	0	179	0	1347	610	949	0	0	45	0	2261	0	3764	645	0	0	0	0	0	0	0	0	0	0	15307	0	0	0	2191	0	44	0	634	0	0	0	0	0
	d__Bacteria;p__Firmicutes_A;c__Clostridia;o__Lachnospirales;f__Anaerotignaceae;g__unknown	unknown	0	0	0	0	0	0	0	0	0	0	0	0	0	0	0	0	0	0	0	0	0	0	0	0	0	0	0	0	0	0	0	0	0	0	0	0	0	0	0	0	0	0	0	0	0	0	0
	d__Bacteria;p__Proteobacteria;c__Gammaproteobacteria;o__Enterobacterales;f__Pasteurellaceae;g__unknown	unknown	0	426	361	0	210	0	0	0	0	0	0	135	0	0	0	0	0	0	0	0	0	0	77	0	0	170	0	0	0	0	0	0	0	0	0	0	0	0	0	329	15	0	0	0	0	0	0
	d__Bacteria;p__Firmicutes_A;c__Clostridia;o__Oscillospirales;f__Ruminococcaceae;g__unknown	unknown	0	0	0	0	0	0	0	0	0	0	0	0	0	0	0	0	0	0	0	0	0	38	0	0	0	0	0	0	0	0	0	0	0	0	0	0	0	0	0	0	0	10186	0	0	0	549	0
	d__Bacteria;p__Firmicutes_A;c__Clostridia;o__Lachnospirales;f__Lachnospiraceae;g__14-2	unknown	0	0	0	0	0	0	0	0	0	0	107	0	226	299	0	0	0	0	298	105	0	93	3071	0	0	0	0	0	0	0	0	0	0	0	0	39	0	52	66	0	0	265	0	0	0	0	0
	d__Bacteria;p__Actinobacteriota;c__Coriobacteriia;o__Coriobacteriales;f__Atopobiaceae;g__unknown	unknown	0	111	0	0	0	0	0	0	28	28	0	0	232	0	57	306	191	221	0	0	2224	0	82	335	0	0	0	87	265	0	0	0	0	0	0	0	0	756	0	0	40	0	852	0	0	0	0
	d__Bacteria;p__Firmicutes_A;c__Clostridia;o__TANB77;f__CAG-508;g__unknown	unknown	0	0	0	0	0	0	0	0	0	0	0	0	0	543	0	0	0	0	0	0	0	47	0	0	0	0	0	0	0	0	0	0	0	0	0	0	0	0	0	0	0	112	0	0	0	0	2484
	d__Bacteria;p__Firmicutes_A;c__Clostridia;o__Oscillospirales;f__Oscillospiraceae;g__unknown	unknown	0	0	0	0	0	0	0	0	0	0	0	0	0	0	0	0	0	0	0	0	0	111	542	0	0	0	0	0	0	0	0	0	0	0	0	0	0	1357	0	0	0	0	0	0	0	0	0
	d__Bacteria;p__Actinobacteriota;c__Coriobacteriia;o__Coriobacteriales;f__Eggerthellaceae;g__unknown	unknown	0	0	0	0	0	0	0	0	566	92	0	0	0	0	0	93	18	0	0	0	0	0	0	36	0	0	0	0	0	0	0	0	0	0	0	0	36	0	0	0	124	0	0	0	0	0	0
	d__Bacteria;p__Actinobacteriota;c__Actinomycetia;o__Actinomycetales;f__Actinomycetaceae;g__Varibaculum	Varibaculum	0	0	0	0	0	7920	0	0	0	1439	0	0	0	0	623	519	0	0	0	0	0	0	0	0	0	0	0	0	0	4522	0	276	0	0	0	0	0	0	0	0	0	0	0	0	0	0	0
	d__Bacteria;p__Firmicutes_C;c__Negativicutes;o__Veillonellales;f__Veillonellaceae;g__Veillonella	Veillonella	25277	306655	285457	0	1566	1112438	2077291	0	94228	1472	20966	423886	1459	2118	0	12208	0	153	1288	14630	14087	32454	75710	0	0	2833	9074	0	0	0	30505	131054	2269	0	0	108518	4043	0	9574	99573	193306	4201	12273	164586	237297	3878	0
	d__Bacteria;p__Firmicutes_C;c__Negativicutes;o__Veillonellales;f__Veillonellaceae;g__Veillonella_A	Veillonella_A	0	750	292	0	0	1044	5700	0	0	217361	0	446	0	0	0	0	0	0	0	0	0	0	0	0	0	0	0	0	0	0	104022	42072	0	0	0	11	0	0	0	0	238	0	0	35	213	0	0
	d__Bacteria;p__Firmicutes_A;c__Clostridia;o__Lachnospirales;f__Lachnospiraceae;g__Velocimicrobium	Velocimicrobium	0	0	0	0	0	0	0	0	0	0	0	0	0	0	0	0	0	0	0	0	0	0	96	0	0	0	0	0	0	0	0	0	0	0	0	0	0	0	0	0	0	0	0	0	0	0	0
	d__Bacteria;p__Firmicutes;c__Bacilli;o__RF39;f__UBA660;g__Ventrenecus	Ventrenecus	0	0	0	0	0	0	0	0	0	0	2377	0	0	45	0	0	0	0	17124	0	0	22006	0	0	0	0	0	0	0	0	0	0	0	0	0	0	0	843	0	0	0	35223	0	0	0	0	0
	d__Bacteria;p__Firmicutes_A;c__Clostridia;o__Christensenellales;f__CAG-74;g__Ventricola	Ventricola	0	0	0	0	0	0	0	0	0	0	1157	0	0	2530	0	0	0	0	958	0	0	3084	0	0	0	0	0	0	0	0	0	0	0	0	0	0	0	0	0	0	0	0	0	0	0	0	0
	d__Bacteria;p__Firmicutes_A;c__Clostridia;o__Lachnospirales;f__Lachnospiraceae;g__Ventrimonas	Ventrimonas	0	0	0	0	0	0	0	0	0	0	0	0	0	14400	0	0	0	0	139	0	0	0	2749	0	410	0	0	0	0	0	0	0	0	0	0	250	0	1676	829	0	0	11191	0	0	0	179	0
	d__Bacteria;p__Firmicutes_A;c__Clostridia;o__Lachnospirales;f__Lachnospiraceae;g__Ventrisoma	Ventrisoma	0	0	0	0	0	0	0	0	0	0	0	0	0	0	0	0	0	0	0	0	0	0	0	0	0	0	0	0	0	0	0	0	0	0	0	346	0	0	0	0	0	0	0	0	0	0	0
	d__Bacteria;p__Proteobacteria;c__Gammaproteobacteria;o__Enterobacterales;f__Pasteurellaceae;g__Volucribacter	Volucribacter	0	0	0	0	0	0	0	0	0	0	0	0	0	0	0	0	0	0	0	0	0	0	0	0	0	0	0	0	0	0	0	0	0	0	0	0	0	0	0	9	0	0	0	0	0	0	0
	d__Bacteria;p__Firmicutes_A;c__Clostridia;o__Peptostreptococcales;f__Anaerovoracaceae;g__VUNA01	VUNA01	0	0	0	0	0	0	0	0	0	0	0	0	0	0	19697	0	0	8338	0	0	2524	0	0	0	0	0	0	0	0	0	0	0	0	0	0	0	0	0	0	0	0	0	0	0	0	0	0
	d__Bacteria;p__Firmicutes_A;c__Clostridia;o__Lachnospirales;f__Lachnospiraceae;g__Weimeria	Weimeria	0	0	0	0	0	0	0	0	0	0	0	0	0	0	0	0	0	0	0	0	0	0	252	0	0	0	0	0	0	0	0	0	0	0	0	0	0	0	0	0	0	0	0	0	0	0	0
	d__Bacteria;p__Firmicutes_A;c__Clostridia;o__Lachnospirales;f__Lachnospiraceae;g__XBD2001	XBD2001	0	0	0	0	0	0	0	0	0	0	0	0	0	131	0	0	0	0	0	0	0	0	556	0	0	0	0	0	0	0	0	0	0	0	0	0	0	0	0	0	0	72	0	0	0	0	0
	d__Bacteria;p__Proteobacteria;c__Gammaproteobacteria;o__Enterobacterales;f__Enterobacteriaceae;g__Yersinia	Yersinia	0	0	0	0	0	0	0	0	67	0	0	0	0	0	0	0	0	0	0	0	0	0	0	0	0	0	0	0	0	0	0	0	33	115	0	0	0	0	0	0	0	0	0	0	0	0	0
	d__Bacteria;p__Proteobacteria;c__Gammaproteobacteria;o__Enterobacterales;f__Enterobacteriaceae;g__Yokenella	Yokenella	10930	1109	318	0	492	3731	1169	0	4389	374	0	86	485	0	0	3320	199	28	0	0	0	0	0	85	1749	0	636	375	15917	0	919	1136	2159	5726	0	282	0	0	0	627	0	0	0	913	0	228	0
	d__Bacteria;p__Cyanobacteria;c__Vampirovibrionia;o__Gastranaerophilales;f__Gastranaerophilaceae;g__Zag111	Zag111	0	0	0	0	0	0	0	0	0	0	328	0	0	119444	0	0	0	0	0	0	0	8759	0	0	0	0	0	0	0	0	0	0	0	0	0	0	0	0	0	0	0	0	0	0	0	0	0
	d__Bacteria;p__Actinobacteriota;c__Coriobacteriia;o__Coriobacteriales;f__Eggerthellaceae;g__ZJ141	ZJ141	0	0	0	0	0	0	0	0	331	52	0	0	0	0	0	31	62	0	0	0	0	0	0	0	0	0	0	0	0	0	0	0	0	0	0	0	0	0	0	0	10	0	0	0	0	0	0
			9660924	12209365	9568525	5298774	11398300	11174233	9137158	11766149	11512167	10742866	12429766	3110083	10881046	10181948	12595850	11842866	9013544	11407444	3867964	13428852	6641751	11437849	11292107	11788131	11989569	7840041	10594806	9614181	11828151	8672889	12651240	7797324	5227054	11073591	8793366	11221744	11694736	14207686	10378388	12688581	11315115	9426207	11619172	11718959	10979908	10750163	12702704
	s		elcho01	elcho02	elcho03	elcho04	elcho05	elcho06	elcho07	elcho08	elcho09	elcho10	elcho11	elcho12	elcho13	elcho14	elcho15	elcho16	elcho17	elcho18	elcho19	elcho20	elcho21	elcho22	elcho23	elcho24	elcho25	elcho26	elcho27	elcho28	elcho29	elcho30	elcho31	elcho32	elcho33	elcho34	elcho35	elcho36	elcho37	elcho38	elcho39	elcho40	elcho41	elcho42	elcho43	elcho44	elcho45	elcho46	elcho47
	d__Bacteria;p__Actinobacteriota;c__Actinomycetia;o__Actinomycetales;f__Bifidobacteriaceae;g__Bifidobacterium;s__Bifidobacterium_longum	Bifidobacterium_longum	2677272	634892	2801508	1267341	8644378	2380553	2669561	1644120	2929727	3588564	393	195200	108608	0	579745	2144955	185447	437817	3437	583	480914	2380	22660	1384024	6601	1015375	5679108	4925152	6231261	2293765	1232098	1701416	1202024	107701	7468617	118228	3592990	41111	28458	142594	1424782	31995	192133	1047963	777662	884061	300125
	d__Bacteria;p__Bacteroidota;c__Bacteroidia;o__Bacteroidales;f__Bacteroidaceae;g__Bacteroides;s__Bacteroides_fragilis	Bacteroides_fragilis	0	763556	0	754	0	0	0	985295	0	0	25757	0	458755	2578	555080	0	727433	196030	9357	44802	0	10482	306950	154928	0	0	0	0	0	0	6608679	0	0	30498	322023	4555815	1679103	81191	26121	909319	20870	413543	0	0	0	151774	52424
	d__Bacteria;p__Bacteroidota;c__Bacteroidia;o__Bacteroidales;f__Bacteroidaceae;g__Bacteroides;s__Bacteroides_fragilis_A	Bacteroides_fragilis_A	0	101598	0	1535	0	0	0	8437247	0	0	139433	0	71547	1404	86087	0	4378489	28674	69594	203403	0	31824	47198	1089588	0	0	0	0	0	0	859974	0	0	5341	27150	535958	235337	465015	202327	149290	2236	3375246	0	0	0	1076751	319265
	d__Bacteria;p__Bacteroidota;c__Bacteroidia;o__Bacteroidales;f__Bacteroidaceae;g__Phocaeicola;s__Phocaeicola_vulgatus	Phocaeicola_vulgatus	0	66832	0	0	0	0	0	0	0	0	133305	0	240034	12457	447011	0	0	42459	18303	382376	0	170130	221778	575709	0	0	0	0	0	0	0	0	0	81584	0	0	0	438656	70164	925337	0	101610	3435	0	0	672685	1339727
	d__Bacteria;p__Proteobacteria;c__Gammaproteobacteria;o__Enterobacterales;f__Enterobacteriaceae;g__Escherichia;s__Escherichia_coli	Escherichia_coli	0	769641	573548	118096	414253	0	1042512	156732	998979	335049	0	237812	511006	0	5520	388885	429198	261957	15112	83422	1523	44109	992	160676	791279	9601	1163940	914991	980	114359	1446713	1192174	1824202	2363065	105097	291746	153850	34515	86517	792941	57536	0	11177	1701253	76747	73223	0
	d__Bacteria;p__Actinobacteriota;c__Actinomycetia;o__Actinomycetales;f__Bifidobacteriaceae;g__Bifidobacterium;s__Bifidobacterium_breve	Bifidobacterium_breve	2953271	179898	125635	251845	431728	363748	164771	83525	377790	778365	0	24664	129224	0	296058	450505	46325	144575	0	1158	49590	0	4189	366410	0	5955067	269868	365919	275997	640770	94628	88362	61703	3885	282510	38574	226235	4298	13691	21385	529786	11008	36651	245487	218876	161567	23356
	d__Bacteria;p__Bacteroidota;c__Bacteroidia;o__Bacteroidales;f__Bacteroidaceae;g__Prevotella;s__Prevotella_copri	Prevotella_copri	0	218283	0	0	0	0	0	0	0	0	1371747	63381	672088	292669	14848	0	53141	489010	43348	189069	31229	152961	184991	0	0	0	0	0	0	10043	0	0	0	6266	0	0	39858	1101544	147863	112951	517044	0	2441416	0	0	279743	122575
	d__Bacteria;p__Bacteroidota;c__Bacteroidia;o__Bacteroidales;f__Bacteroidaceae;g__Bacteroides;s__Bacteroides_ovatus	Bacteroides_ovatus	0	356487	0	0	0	0	0	0	0	0	107552	0	611711	139965	98385	0	0	110665	72581	561955	0	440336	884065	2992664	0	0	0	0	0	0	0	0	0	0	52884	0	101781	10548	191163	55708	0	0	329	0	0	21616	6496
	d__Bacteria;p__Bacteroidota;c__Bacteroidia;o__Bacteroidales;f__Bacteroidaceae;g__Phocaeicola;s__Phocaeicola_dorei	Phocaeicola_dorei	0	2680	0	0	0	0	0	0	0	0	5558	0	5818	1278	13818	0	0	2779	0	6717	0	6267	5262	16853	0	0	0	0	0	0	0	0	0	120494	0	0	0	10740	5285	22848	0	49691	0	0	0	14760	44097
	d__Bacteria;p__Bacteroidota;c__Bacteroidia;o__Bacteroidales;f__Bacteroidaceae;g__Bacteroides;s__Bacteroides_thetaiotaomicron	Bacteroides_thetaiotaomicron	0	123594	0	1839030	0	0	0	0	0	0	145143	0	353231	95519	638521	0	133	26358	7436	644797	0	335758	21495	73061	0	0	0	0	0	0	0	0	0	3326	318	0	1465219	1103258	225471	446255	0	1442	0	0	0	171839	87719
	d__Bacteria;p__Bacteroidota;c__Bacteroidia;o__Bacteroidales;f__Tannerellaceae;g__Parabacteroides;s__Parabacteroides_distasonis	Parabacteroides_distasonis	0	65095	0	0	0	0	0	0	0	0	46222	0	17680	39398	78699	0	0	50038	30283	303930	17253	367810	81250	0	0	0	0	0	0	0	0	0	0	3472144	39502	0	0	250965	0	9171	733	0	2100	0	0	0	0
	d__Bacteria;p__Firmicutes_A;c__Clostridia;o__Oscillospirales;f__Ruminococcaceae;g__Faecalibacterium;s__Faecalibacterium_prausnitzii_G	Faecalibacterium_prausnitzii_G	0	976173	0	57976	0	0	0	0	0	0	47763	0	486260	16345	26526	1844578	0	253102	186358	154527	215873	91954	1244470	171527	0	0	0	0	0	0	0	0	0	79696	0	261496	150688	205612	242141	0	71547	365662	83997	507285	3885312	1053352	127705
	d__Bacteria;p__Firmicutes_A;c__Clostridia;o__Clostridiales;f__Clostridiaceae;g__Clostridium;s__Clostridium_neonatale	Clostridium_neonatale	0	0	0	38609	0	0	0	0	44516	33025	0	0	0	0	0	0	0	0	0	0	0	0	0	0	3415461	0	0	0	0	2156	0	0	20086	0	0	0	0	0	0	0	0	0	0	0	0	0	0
	d__Bacteria;p__Bacteroidota;c__Bacteroidia;o__Bacteroidales;f__Bacteroidaceae;g__Prevotella;s__Prevotella_copri_A	Prevotella_copri_A	0	222926	0	0	0	0	0	0	0	0	2587062	0	226163	531830	20209	0	852	602731	315494	4029912	382420	379599	893641	0	0	0	0	0	0	119831	0	0	0	0	0	0	140205	1660246	2520063	533181	236996	0	823502	0	0	0	0
	d__Bacteria;p__Bacteroidota;c__Bacteroidia;o__Bacteroidales;f__Rikenellaceae;g__Alistipes;s__Alistipes_onderdonkii	Alistipes_onderdonkii	0	0	0	0	0	0	0	0	0	0	5501	0	76992	15324	394313	0	0	14038	3086	1835968	0	51141	79876	0	0	0	0	0	0	0	0	0	0	0	0	0	0	35762	0	0	0	0	0	0	0	1495224	4915287
	d__Bacteria;p__Actinobacteriota;c__Actinomycetia;o__Actinomycetales;f__Bifidobacteriaceae;g__Bifidobacterium;s__Bifidobacterium_bifidum	Bifidobacterium_bifidum	18451	416692	6867	197915	639979	538362	1011242	2702	235684	1166852	212	626096	207516	0	445135	870678	128324	356075	340	13172	113908	6984	58572	216996	0	55635	1300040	516962	620766	10240	304290	195425	199400	525	14653	26746	481888	6244	160788	170461	522350	30460	92072	303980	137922	79413	57368
	d__Bacteria;p__Firmicutes_C;c__Negativicutes;o__Veillonellales;f__Megasphaeraceae;g__Megasphaera;s__Megasphaera_sp000417505	Megasphaera_sp000417505	0	1511156	0	83174	0	0	0	3364	261123	1125307	0	13211	813695	0	38537	401233	280494	151754	0	33833	148268	0	0	604669	0	0	0	1049672	0	1867000	267537	70840	169175	0	0	244538	104961	0	3787	505271	2271523	0	643552	3212711	1237185	84844	9255
	d__Bacteria;p__Bacteroidota;c__Bacteroidia;o__Bacteroidales;f__Bacteroidaceae;g__Bacteroides;s__Bacteroides_uniformis	Bacteroides_uniformis	0	5922	0	0	0	0	0	0	0	0	11607	0	0	177040	101081	0	0	44057	32537	263361	0	572	16419	124	0	0	0	0	0	0	0	0	0	0	17852	0	0	153432	152	0	16534	0	0	0	0	319965	891675
	d__Bacteria;p__Firmicutes_A;c__Clostridia;o__Lachnospirales;f__Lachnospiraceae;g__Ruminococcus_B;s__Ruminococcus_B_gnavus	Ruminococcus_B_gnavus	0	20106	0	102061	0	0	0	0	0	76881	0	0	1790	177	0	0	0	0	0	436	0	18349	1246	4697	0	0	0	0	0	132910	24437	0	0	0	0	38615	1263	431	0	0	0	0	0	9943	8274	7014	7090
	d__Bacteria;p__Bacteroidota;c__Bacteroidia;o__Bacteroidales;f__Bacteroidaceae;g__Bacteroides;s__Bacteroides_caccae	Bacteroides_caccae	0	35947	0	68341	0	0	0	2311	0	0	481409	0	66729	21194	93578	0	1983	384788	12419	85615	0	437476	74142	271124	0	0	0	0	0	0	490	0	0	15889	2159	166	69061	59733	38596	395590	2804	2423	0	0	0	40213	18635
	d__Bacteria;p__Actinobacteriota;c__Coriobacteriia;o__Coriobacteriales;f__Atopobiaceae;g__Parolsenella;s__Parolsenella_uli_B	Parolsenella_uli_B	0	1265039	0	0	0	878	0	0	3958005	888467	0	31134	394756	0	624515	1373596	214492	262487	0	1440	265625	0	16272	894861	0	0	0	389715	1021796	0	0	0	0	0	0	133669	299	116	0	78128	369700	0	1819	0	0	0	0
	d__Bacteria;p__Bacteroidota;c__Bacteroidia;o__Bacteroidales;f__Bacteroidaceae;g__Bacteroides;s__Bacteroides_xylanisolvens	Bacteroides_xylanisolvens	0	30873	0	10854	0	0	0	0	0	0	139953	0	48399	44183	20692	0	0	15085	105094	105614	0	117093	94736	277901	0	0	0	0	0	0	0	0	0	188377	1578	0	25206	28803	62077	1254225	60207	0	0	0	0	8081	2612
	d__Bacteria;p__Proteobacteria;c__Gammaproteobacteria;o__Enterobacterales;f__Enterobacteriaceae;g__Klebsiella;s__Klebsiella_pneumoniae	Klebsiella_pneumoniae	1563711	0	0	0	11171	517622	0	3337	106672	0	0	0	0	0	0	171696	0	0	0	0	0	0	0	2216	38985	0	0	0	1245282	0	0	17993	733	113957	0	0	0	0	0	0	0	0	0	0	0	27487	770
	d__Bacteria;p__Proteobacteria;c__Gammaproteobacteria;o__Enterobacterales;f__Enterobacteriaceae;g__Escherichia;s__Escherichia_marmotae	Escherichia_marmotae	0	172223	107718	20439	139290	0	229812	41911	284398	69503	0	56245	121334	0	0	94878	86184	48461	1645	17060	0	6694	0	34061	272688	1614	271498	211791	0	52766	317264	248534	371278	533032	13889	58132	32997	6321	14443	162015	15831	0	1639	374164	29843	15404	0
	d__Bacteria;p__Bacteroidota;c__Bacteroidia;o__Bacteroidales;f__Bacteroidaceae;g__Phocaeicola;s__Phocaeicola_sartorii	Phocaeicola_sartorii	0	3248	0	0	0	0	0	0	0	0	9543	0	11648	472	27330	0	0	3756	1094	22688	0	11369	12656	37744	0	0	0	0	0	0	0	0	0	3463822	0	0	0	26454	6573	74674	0	66673	0	0	0	39641	78603
	d__Bacteria;p__Bacteroidota;c__Bacteroidia;o__Bacteroidales;f__Bacteroidaceae;g__Bacteroides;s__Bacteroides_faecis	Bacteroides_faecis	0	31754	0	235268	0	0	0	0	0	0	43918	0	83331	19072	106176	0	0	13438	4525	126758	0	85929	31509	132625	0	0	0	0	0	0	0	0	0	4211	0	0	212009	180321	46376	128754	325	0	0	0	0	74190	42438
	d__Bacteria;p__Proteobacteria;c__Gammaproteobacteria;o__Burkholderiales;f__Burkholderiaceae;g__Sutterella;s__Sutterella_wadsworthensis	Sutterella_wadsworthensis	0	54399	0	0	0	4007248	0	0	0	0	0	0	10328	0	2829	0	0	1884	0	0	8349	0	4558	0	0	0	0	0	0	0	0	0	0	0	0	164080	48637	2626	0	392652	0	0	0	0	0	2685	1083
	d__Bacteria;p__Firmicutes_A;c__Clostridia;o__Lachnospirales;f__Lachnospiraceae;g__Blautia_A;s__Blautia_A_wexlerae	Blautia_A_wexlerae	0	85050	0	71774	0	0	0	0	0	98498	14771	0	65959	56385	21846	126991	101367	111842	31740	14219	19869	350095	33492	39226	0	0	0	0	0	366	0	0	0	0	0	47569	139479	55129	191423	0	3284	15779	86859	94087	80033	125040	90175
	d__Bacteria;p__Firmicutes_A;c__Clostridia;o__Lachnospirales;f__Lachnospiraceae;g__Agathobacter;s__Agathobacter_rectalis	Agathobacter_rectalis	0	0	0	0	0	0	0	0	57573	0	185616	0	257369	157728	32496	94677	6659	33792	15514	144801	31814	67092	481499	0	0	0	0	0	0	14857	32	0	0	0	0	116509	0	19342	163625	0	0	12555	0	0	0	0	0
	d__Bacteria;p__Bacteroidota;c__Bacteroidia;o__Bacteroidales;f__Bacteroidaceae;g__Prevotella;s__Prevotella_sp900767615	Prevotella_sp900767615	0	58779	0	0	0	0	0	0	0	0	471636	1376	81485	294739	5777	0	5837	97483	190088	447552	87117	44698	195897	0	0	0	0	0	0	29959	0	0	0	0	0	0	35683	646845	278921	72502	79699	0	1752319	0	0	4678	3094
	d__Bacteria;p__Bacteroidota;c__Bacteroidia;o__Bacteroidales;f__Bacteroidaceae;g__Bacteroides;s__Bacteroides_finegoldii	Bacteroides_finegoldii	0	50515	0	63579	0	0	0	4436	0	0	67125	0	88781	25752	46500	0	3890	38954	15689	110673	0	105062	90540	358274	0	0	0	0	0	0	2884	0	0	20993	2932	1896	76564	65856	48234	167018	4854	3174	0	0	0	36311	20227
	d__Bacteria;p__Firmicutes_C;c__Negativicutes;o__Veillonellales;f__Veillonellaceae;g__Veillonella;s__Veillonella_parvula_A	Veillonella_parvula_A	1905	22889	4831	0	1566	734662	132652	0	75092	0	1420	8608	0	754	0	1636	0	153	1288	573	10918	4870	11874	0	0	0	79	0	0	0	22990	28824	548	0	0	6762	4043	0	1195	76173	27550	2875	9513	94830	98208	1188	0
	d__Bacteria;p__Bacteroidota;c__Bacteroidia;o__Bacteroidales;f__Bacteroidaceae;g__Prevotella;s__Prevotella_sp900544825	Prevotella_sp900544825	0	173464	0	0	0	0	0	0	0	0	733345	3070	187567	327184	3569	0	8461	249619	19743	313886	104360	138207	605010	0	0	0	0	0	0	0	0	0	0	0	0	0	19054	220003	919502	220003	42308	0	466802	0	0	4408	2658
	d__Bacteria;p__Firmicutes_C;c__Negativicutes;o__Veillonellales;f__Veillonellaceae;g__Veillonella;s__Veillonella_atypica	Veillonella_atypica	2143	90986	166113	0	0	154307	564724	0	851	298	6575	330804	0	931	0	1368	0	0	0	989	528	1659	13624	0	0	2388	1965	0	0	0	2259	48748	898	0	0	15165	0	0	5677	974	51927	204	0	8485	47369	51	0
	d__Bacteria;p__Proteobacteria;c__Gammaproteobacteria;o__Enterobacterales;f__Enterobacteriaceae;g__Klebsiella;s__Klebsiella_michiganensis	Klebsiella_michiganensis	0	0	0	0	0	0	0	0	0	0	0	0	0	0	0	0	0	0	0	0	0	0	0	0	0	0	0	0	0	0	0	0	0	0	0	0	0	0	0	0	0	0	0	0	0	0	0
	d__Bacteria;p__Verrucomicrobiota;c__Verrucomicrobiae;o__Verrucomicrobiales;f__Akkermansiaceae;g__Akkermansia;s__Akkermansia_muciniphila	Akkermansia_muciniphila	0	0	0	0	0	0	0	0	0	0	111239	0	2427	14989	0	0	161736	0	1910	0	0	296042	4179	7000	0	0	0	69591	0	78912	0	0	64549	0	0	166554	0	145088	3835	744729	57795	42261	0	0	0	534911	8637
	d__Bacteria;p__Firmicutes;c__Bacilli;o__Lactobacillales;f__Streptococcaceae;g__Streptococcus;s__Streptococcus_sp000187445	Streptococcus_sp000187445	227272	163448	610273	6807	50915	217429	464339	8475	44532	46074	579	187362	41405	6345	6893	43643	6825	24902	853	1557	8865	453	24707	25285	77424	75415	535660	58709	54014	55657	11416	865679	56014	1636	44057	42692	11991	0	6103	0	130990	25	29110	896184	83440	552	0
	d__Bacteria;p__Bacteroidota;c__Bacteroidia;o__Bacteroidales;f__UBA932;g__Cryptobacteroides;s__Cryptobacteroides_sp000434935	Cryptobacteroides_sp000434935	0	0	0	0	0	0	0	0	0	0	0	0	0	0	4723165	0	0	6142	0	0	96861	112468	0	0	0	0	0	0	0	0	0	0	0	0	0	0	0	0	0	0	9065	0	1157	0	0	0	0
	d__Bacteria;p__Bacteroidota;c__Bacteroidia;o__Bacteroidales;f__Bacteroidaceae;g__Bacteroides;s__Bacteroides_stercoris	Bacteroides_stercoris	0	0	0	0	0	0	0	0	0	0	12764	0	0	1707	2231	0	0	205	0	263534	0	419	65753	640	0	0	0	0	0	0	0	0	0	0	0	0	0	686511	57992	346	0	0	0	0	0	5384	10631
	d__Bacteria;p__Actinobacteriota;c__Actinomycetia;o__Actinomycetales;f__Bifidobacteriaceae;g__Bifidobacterium;s__Bifidobacterium_catenulatum	Bifidobacterium_catenulatum	61	394333	0	3304	841	240	153	0	27790	1195	1449	0	251735	1268	289489	17693	44213	420475	13305	31678	464137	26084	19889	152	0	0	520	1156	498	3847	270	87	3510	0	0	39835	1670	306268	120932	0	1542479	0	19154	118	146	61	1299
	d__Bacteria;p__Firmicutes;c__Bacilli;o__Lactobacillales;f__Streptococcaceae;g__Streptococcus;s__Streptococcus_lactarius	Streptococcus_lactarius	232026	49399	3042947	2714	75243	1961	468254	17528	16929	10862	0	107530	6883	116	1193	24934	2460	2068	138	0	0	0	5931	11363	429	27016	229815	39422	27158	11868	7709	37094	33895	704	3651	6849	4247	0	2692	1042	30506	0	0	260617	23901	1882	0
	d__Bacteria;p__Firmicutes_A;c__Clostridia;o__Lachnospirales;f__Lachnospiraceae;g__Hungatella;s__Hungatella_sp005845265	Hungatella_sp005845265	0	0	0	2697	0	0	0	0	0	15637	0	0	0	0	0	0	0	0	0	0	0	0	0	0	3726679	0	0	0	0	0	0	0	0	0	0	97856	3940	0	0	6131	0	7634	0	0	4927	0	0
	d__Bacteria;p__Bacteroidota;c__Bacteroidia;o__Bacteroidales;f__Marinifilaceae;g__Odoribacter;s__Odoribacter_splanchnicus	Odoribacter_splanchnicus	0	7558	0	0	0	0	0	0	0	0	40650	0	117619	115218	429686	0	0	71750	0	0	1691	548414	14446	0	0	0	0	0	0	0	0	0	0	0	0	0	0	0	0	1925325	0	0	6395	0	0	26356	53377
	d__Bacteria;p__Firmicutes_C;c__Negativicutes;o__Veillonellales;f__Megasphaeraceae;g__Megasphaera;s__Megasphaera_sp900548635	Megasphaera_sp900548635	0	377368	0	14185	0	0	0	0	60552	268175	0	1860	189828	0	8553	97879	64100	33416	0	6187	35741	0	0	129237	0	0	0	220893	0	451539	54598	14272	37428	0	0	51542	26116	0	253	121802	593206	0	158886	808695	277112	20540	1851
	d__Bacteria;p__Firmicutes_A;c__Clostridia;o__Lachnospirales;f__Lachnospiraceae;g__Anaerostipes;s__Anaerostipes_hadrus	Anaerostipes_hadrus	0	2373	0	0	0	0	0	0	0	0	5468	0	19642	5388	23953	8780	1671	16632	1507	409	2448	1717	63887	0	0	0	0	0	0	6410	0	0	0	0	0	139540	0	70141	42649	0	1459	11202	4505	43838	32551	67272	37233
	d__Bacteria;p__Bacteroidota;c__Bacteroidia;o__Bacteroidales;f__Bacteroidaceae;g__Bacteroides;s__Bacteroides_eggerthii	Bacteroides_eggerthii	0	1337	0	0	0	0	0	0	0	0	4652	0	1834	4118	4654	0	0	2585	457	58256	0	2954	12839	6399	0	0	0	0	0	0	0	0	0	275	0	0	2247	112483	10050	5231	0	160	0	0	0	10519	14478
	d__Bacteria;p__Proteobacteria;c__Gammaproteobacteria;o__Enterobacterales;f__Enterobacteriaceae;g__Enterobacter;s__Enterobacter_roggenkampii	Enterobacter_roggenkampii	0	4071	0	0	0	0	0	0	0	0	0	0	0	0	0	0	0	0	0	0	0	0	0	0	0	0	0	0	0	0	0	0	0	0	0	0	0	0	0	0	0	0	0	0	0	7680	0
	d__Bacteria;p__Firmicutes_A;c__Clostridia;o__Oscillospirales;f__Oscillospiraceae;g__Flavonifractor;s__Flavonifractor_plautii	Flavonifractor_plautii	0	22936	0	58564	0	0	0	0	0	57540	491	0	8564	96	15416	0	82229	138975	0	13402	0	3754	3062	74724	153762	0	0	0	0	17267	0	0	86199	7367	0	0	105119	10488	7071	80609	0	3708	0	680	8239	55585	32387
	d__Bacteria;p__Firmicutes_A;c__Clostridia;o__Oscillospirales;f__Acutalibacteraceae;g__Fimenecus;s__Fimenecus_sp000432435	Fimenecus_sp000432435	0	0	0	0	0	0	0	0	0	0	110	0	235613	25165	0	0	0	495271	30511	92010	19856	225395	445210	0	0	0	0	0	0	0	0	0	0	0	0	0	0	57025	0	0	9195	638320	0	0	0	0	0
	d__Bacteria;p__Firmicutes_A;c__Clostridia;o__Peptostreptococcales;f__Peptostreptococcaceae;g__Clostridioides;s__Clostridioides_difficile	Clostridioides_difficile	0	0	0	1356	0	0	0	0	0	0	0	0	0	0	0	0	0	0	0	0	0	0	0	47381	7522	0	0	0	0	0	0	0	15723	170	0	0	0	0	0	0	0	0	0	0	0	0	0
	d__Bacteria;p__Bacteroidota;c__Bacteroidia;o__Bacteroidales;f__Bacteroidaceae;g__Prevotella;s__Prevotella_sp900313215	Prevotella_sp900313215	0	13125	0	0	0	0	0	0	0	0	114343	278	33761	146949	4985	0	10700	65150	12377	62609	25472	11093	40124	0	0	0	0	0	0	3863	0	0	0	0	0	0	7260	87099	1430212	11342	16004	0	125607	0	0	3336	1068
	d__Bacteria;p__Firmicutes_A;c__Clostridia;o__Lachnospirales;f__Lachnospiraceae;g__Enterocloster;s__Enterocloster_sp900538485	Enterocloster_sp900538485	0	4094	0	0	0	0	0	0	0	0	0	0	594	0	0	0	0	0	0	0	0	0	0	376	0	0	0	0	0	45063	0	0	0	0	0	0	0	0	0	0	0	0	0	28572	35026	0	0
	d__Bacteria;p__Proteobacteria;c__Gammaproteobacteria;o__Enterobacterales;f__Enterobacteriaceae;g__Mixta;s__Mixta_calida	Mixta_calida	0	0	0	0	0	0	0	0	0	0	0	0	0	0	0	0	0	0	0	0	0	0	0	0	0	0	0	0	0	0	0	0	0	0	0	0	0	0	0	0	0	0	0	0	0	0	0
	d__Bacteria;p__Bacteroidota;c__Bacteroidia;o__Bacteroidales;f__Rikenellaceae;g__Alistipes;s__Alistipes_sp902388705	Alistipes_sp902388705	0	0	0	0	0	0	0	0	0	0	2000	0	9748	3330	60841	0	0	917	2765	271917	0	308913	10810	0	0	0	0	0	0	0	0	0	0	0	0	0	0	40078	0	0	0	0	0	0	0	238117	826219
	d__Bacteria;p__Firmicutes;c__Bacilli;o__Lactobacillales;f__Enterococcaceae;g__Enterococcus;s__Enterococcus_faecalis	Enterococcus_faecalis	0	9581	0	0	94785	60099	0	0	18679	0	0	0	512	0	0	0	0	0	0	0	0	0	0	17515	0	0	16169	539	0	0	0	7568	0	0	0	0	0	0	0	0	0	0	0	0	0	0	0
	d__Bacteria;p__Firmicutes_C;c__Negativicutes;o__Veillonellales;f__Megasphaeraceae;g__Megasphaera;s__Megasphaera_elsdenii	Megasphaera_elsdenii	0	296028	0	11887	0	0	0	0	53125	178618	0	1133	167903	0	7354	68828	48258	33697	0	5381	29876	0	0	108932	0	0	0	203339	0	374895	44983	11583	34039	0	0	35331	20841	0	0	90650	486985	0	126345	632960	222072	19315	1701
	d__Bacteria;p__Firmicutes_A;c__Clostridia;o__Lachnospirales;f__Lachnospiraceae;g__Lachnospira;s__Lachnospira_eligens_A	Lachnospira_eligens_A	0	0	0	0	0	0	0	0	0	0	307	0	0	30614	5105	10793	0	0	21599	27507	0	0	89790	0	0	0	0	0	0	0	0	0	0	0	0	625006	0	0	65312	0	0	102957	0	0	0	0	0
	d__Bacteria;p__Proteobacteria;c__Gammaproteobacteria;o__Enterobacterales;f__Enterobacteriaceae;g__Klebsiella;s__Klebsiella_oxytoca	Klebsiella_oxytoca	0	0	0	0	0	0	0	0	0	0	0	0	0	0	0	0	0	0	0	0	0	0	0	0	0	0	0	0	0	0	0	0	0	0	0	0	0	0	0	0	0	0	0	0	0	0	0
	d__Bacteria;p__Bacteroidota;c__Bacteroidia;o__Bacteroidales;f__Rikenellaceae;g__Alistipes;s__Alistipes_finegoldii	Alistipes_finegoldii	0	842	0	0	0	0	0	0	0	0	381	0	11094	1680	22087	0	0	223	37507	90122	0	37444	3171	0	0	0	0	0	0	0	0	0	0	0	0	0	0	351910	0	0	0	0	0	0	0	99370	289045
	d__Bacteria;p__Bacteroidota;c__Bacteroidia;o__Bacteroidales;f__Bacteroidaceae;g__Bacteroides;s__Bacteroides_nordii	Bacteroides_nordii	0	7212	0	4727	0	0	0	21013	0	0	9918	0	13141	9789	15065	0	14516	6043	1148	18650	0	10822	8947	31212	0	0	0	0	0	0	18497	0	0	1969	737	8686	24778	423308	7985	34314	0	14214	0	0	0	83103	8830
	d__Bacteria;p__Firmicutes_A;c__Clostridia;o__Lachnospirales;f__Lachnospiraceae;g__Roseburia;s__Roseburia_inulinivorans	Roseburia_inulinivorans	0	0	0	0	0	0	0	0	0	0	65090	0	192	84410	8187	0	0	0	240960	100487	23688	41513	358318	0	0	0	0	0	0	0	0	0	0	0	0	0	0	46876	33775	0	0	146451	0	0	0	0	0
	d__Bacteria;p__Bacteroidota;c__Bacteroidia;o__Bacteroidales;f__Bacteroidaceae;g__Phocaeicola;s__Phocaeicola_massiliensis	Phocaeicola_massiliensis	0	405	0	0	0	0	0	0	0	0	613	0	1460	0	1611	0	0	156	0	2813	0	1047	826	3198	0	0	0	0	0	0	0	0	0	5680	0	0	0	5240	415	7928	0	4797	0	0	0	4860	4338
	d__Bacteria;p__Bacteroidota;c__Bacteroidia;o__Bacteroidales;f__Bacteroidaceae;g__Prevotella;s__Prevotella_sp002265625	Prevotella_sp002265625	0	8875	0	0	0	0	0	0	0	0	26639	89345	17006	42604	0	0	0	62457	0	0	369545	932989	0	0	0	0	0	0	0	0	0	0	0	0	0	0	191793	372	219	0	0	0	214184	0	0	0	0
	d__Bacteria;p__Bacteroidota;c__Bacteroidia;o__Bacteroidales;f__Bacteroidaceae;g__Bacteroides;s__Bacteroides_cellulosilyticus	Bacteroides_cellulosilyticus	0	0	0	0	0	0	0	0	0	0	2927	0	0	0	0	0	0	0	0	0	0	4997	1032	0	0	0	0	0	0	0	0	0	0	0	0	0	0	286	123	0	0	0	0	0	0	456	285
	d__Bacteria;p__Firmicutes_A;c__Clostridia;o__Lachnospirales;f__Lachnospiraceae;g__Acetatifactor;s__Acetatifactor_sp900066565	Acetatifactor_sp900066565	0	0	0	0	0	0	0	0	0	0	23669	0	87200	7830	13235	0	0	9918	6211	47387	0	154753	14001	0	0	0	0	0	0	0	0	0	0	0	0	0	0	501	359	0	0	27468	0	0	0	5000	628630
	d__Bacteria;p__Firmicutes;c__Bacilli;o__Erysipelotrichales;f__Erysipelotrichaceae;g__Clostridium_AQ;s__Clostridium_AQ_innocuum	Clostridium_AQ_innocuum	0	0	0	31394	0	0	0	0	0	0	0	0	0	0	1461	0	9344	0	0	0	0	0	0	3540	0	0	0	0	0	16499	0	0	0	0	0	0	23388	0	180	0	0	0	0	0	0	14291	120
	d__Bacteria;p__Firmicutes_C;c__Negativicutes;o__Veillonellales;f__Veillonellaceae;g__Veillonella;s__Veillonella_nakazawae	Veillonella_nakazawae	17496	132818	33993	0	0	55975	835695	0	6979	884	11238	28604	1459	433	0	8340	0	0	0	12243	1722	22813	39014	0	0	139	5868	0	0	0	1577	22330	811	0	0	68795	0	0	2317	9308	68216	1039	2001	34942	43397	2639	0
	d__Bacteria;p__Firmicutes;c__Bacilli;o__Erysipelotrichales;f__Coprobacillaceae;g__Erysipelatoclostridium;s__Erysipelatoclostridium_ramosum	Erysipelatoclostridium_ramosum	0	725	0	7572	0	0	0	0	0	29920	0	0	0	0	166	14735	943	53	0	0	0	0	0	12921	0	0	0	0	0	29891	31990	0	4550	0	0	4326	34673	0	0	0	0	18358	0	8248	10414	6193	3259
	d__Bacteria;p__Firmicutes_A;c__Clostridia;o__Lachnospirales;f__Lachnospiraceae;g__Enterocloster;s__Enterocloster_bolteae	Enterocloster_bolteae	0	0	0	0	0	0	0	0	0	0	0	0	0	0	277	0	0	0	0	0	0	144	0	0	0	0	0	0	0	0	0	0	0	0	0	1664	6184	0	0	0	0	10078	0	0	2829	4331	0
	d__Bacteria;p__Bacteroidota;c__Bacteroidia;o__Bacteroidales;f__Rikenellaceae;g__Alistipes;s__Alistipes_putredinis	Alistipes_putredinis	0	0	0	0	0	0	0	0	0	0	2305	0	20462	2900	21627	0	63387	276495	978	25357	0	30473	313	0	0	0	0	0	0	0	0	0	0	0	0	0	23273	5375	0	0	0	0	0	0	0	16926	51951
	d__Bacteria;p__Firmicutes_A;c__Clostridia;o__Oscillospirales;f__Ruminococcaceae;g__Faecalibacterium;s__Faecalibacterium_prausnitzii_D	Faecalibacterium_prausnitzii_D	0	7775	0	96	0	0	0	0	0	0	25204	0	5549	25807	276	20663	0	3769	11669	17943	17283	64199	26899	1520	0	0	0	0	0	0	0	0	0	409	0	2586	736	38335	12655	0	536	5345	2603	2927	30404	12175	839
	d__Bacteria;p__Bacteroidota;c__Bacteroidia;o__Bacteroidales;f__Tannerellaceae;g__Parabacteroides;s__Parabacteroides_merdae	Parabacteroides_merdae	0	99600	0	0	0	0	0	0	0	0	0	0	108723	45875	0	0	0	0	0	0	0	0	0	0	0	0	0	0	0	0	0	0	0	0	0	0	0	0	0	0	0	0	0	0	0	0	0
	d__Bacteria;p__Bacteroidota;c__Bacteroidia;o__Bacteroidales;f__Bacteroidaceae;g__Prevotella;s__Prevotella_sp000434975	Prevotella_sp000434975	0	70089	0	0	0	0	0	0	0	0	342950	0	284359	42571	0	0	0	709064	0	0	3811	320	0	0	0	0	0	0	0	0	0	0	0	0	0	0	126	0	0	0	0	0	500328	0	0	0	0
	d__Bacteria;p__Firmicutes_A;c__Clostridia;o__Lachnospirales;f__Lachnospiraceae;g__Roseburia;s__Roseburia_intestinalis	Roseburia_intestinalis	0	0	0	0	0	0	0	0	0	0	0	0	0	7870	0	0	0	0	0	0	0	1498	621316	0	0	0	0	0	0	0	0	0	0	0	0	0	0	28298	11161	0	0	0	0	0	0	0	0
	d__Bacteria;p__Firmicutes_A;c__Clostridia;o__Clostridiales;f__Clostridiaceae;g__Clostridium;s__Clostridium_butyricum	Clostridium_butyricum	0	0	0	101	0	454	14534	0	556	499	0	0	0	0	0	0	0	0	0	0	0	0	0	0	1390993	0	0	0	0	0	0	0	0	0	0	0	0	0	0	0	0	0	0	0	0	3125	0
	d__Bacteria;p__Actinobacteriota;c__Coriobacteriia;o__Coriobacteriales;f__Coriobacteriaceae;g__Collinsella;s__Collinsella_sp003458415	Collinsella_sp003458415	0	68214	0	13804	0	73893	10530	0	25012	0	14430	1233	39826	4932	45061	26762	63768	60924	2108	12653	17577	7416	22851	0	0	0	0	0	0	384480	62356	0	109283	0	16941	0	117833	73412	110344	34062	20818	9731	34212	0	0	110097	20422
	d__Bacteria;p__Proteobacteria;c__Gammaproteobacteria;o__Enterobacterales;f__Enterobacteriaceae;g__Klebsiella;s__Klebsiella_quasipneumoniae	Klebsiella_quasipneumoniae	277674	0	0	0	0	69915	0	0	15712	4671	0	0	0	0	0	19556	0	0	0	0	0	0	0	0	3361	0	0	0	368356	0	0	0	0	55796	0	0	0	0	0	0	0	9158	0	0	0	0	0
	d__Bacteria;p__Bacteroidota;c__Bacteroidia;o__Bacteroidales;f__Bacteroidaceae;g__Phocaeicola;s__Phocaeicola_coprophilus	Phocaeicola_coprophilus	0	654	0	0	0	0	0	0	0	0	1956	0	1825	244	2085	0	36	707	0	3520	0	1725	1063	3279	0	0	0	0	0	0	35	0	0	2363	0	0	1424	13007	1149	7333	0	2354	0	0	0	3491	2863
	d__Bacteria;p__Bacteroidota;c__Bacteroidia;o__Bacteroidales;f__Bacteroidaceae;g__Bacteroides;s__Bacteroides_sp900766005	Bacteroides_sp900766005	0	14396	0	16672	0	0	0	8846	0	0	21097	0	21843	8031	16672	0	7260	13711	3672	31325	0	26242	23002	70440	0	0	0	0	0	0	8624	0	0	7784	992	7995	32687	72919	12021	47350	964	9000	0	0	0	16663	16880
	d__Bacteria;p__Bacteroidota;c__Bacteroidia;o__Bacteroidales;f__Bacteroidaceae;g__Prevotella;s__Prevotella_sp900548535	Prevotella_sp900548535	0	23769	0	0	0	0	0	0	0	0	190729	1239	44304	98268	1615	0	4530	44891	28518	138233	23663	18424	68762	0	0	0	0	0	0	7771	0	0	0	0	0	0	6004	124080	110693	25411	34099	0	196745	0	0	5072	2770
	d__Bacteria;p__Firmicutes_C;c__Negativicutes;o__Veillonellales;f__Veillonellaceae;g__Veillonella;s__Veillonella_rogosae	Veillonella_rogosae	1268	8776	1985	0	0	47044	137779	0	4986	0	0	1158	0	0	0	106	0	0	0	175	252	721	2047	0	0	0	0	0	0	0	721	2682	0	0	0	3206	0	0	0	6561	8206	0	150	11248	14897	0	0
	d__Bacteria;p__Firmicutes_A;c__Clostridia;o__Lachnospirales;f__Lachnospiraceae;g__Lachnospira;s__Lachnospira_rogosae_A	Lachnospira_rogosae_A	0	0	0	0	0	0	0	0	0	0	0	0	17341	9047	0	0	2847	0	0	567	0	2232	28505	0	0	0	0	0	0	0	0	0	0	0	0	15152	0	0	0	0	0	1059	0	0	2325	0	0
	d__Bacteria;p__Bacteroidota;c__Bacteroidia;o__Bacteroidales;f__Bacteroidaceae;g__Prevotella;s__Prevotella_sp000436035	Prevotella_sp000436035	0	18743	0	0	0	0	0	0	0	0	165401	143	45275	95686	10077	0	19131	42879	31882	128901	99255	21175	73835	0	0	0	0	0	0	6177	0	0	0	0	0	0	6347	100282	152916	26179	24416	0	178616	0	0	2121	1129
	d__Bacteria;p__Proteobacteria;c__Gammaproteobacteria;o__Burkholderiales;f__Burkholderiaceae;g__Mesosutterella;s__Mesosutterella_multiformis	Mesosutterella_multiformis	0	0	0	10731	0	0	0	46786	135675	80726	0	63910	0	0	0	342517	0	0	0	0	0	0	0	153393	0	0	0	3018	0	2617	135419	141073	96017	0	0	0	0	0	12691	0	23361	0	0	18193	617184	0	0
	d__Bacteria;p__Firmicutes_A;c__Clostridia;o__Oscillospirales;f__Ruminococcaceae;g__Faecalibacterium;s__Faecalibacterium_prausnitzii_I	Faecalibacterium_prausnitzii_I	0	71374	0	2145	0	0	0	0	0	0	48737	0	37335	24723	1966	133308	0	19965	15105	23437	18386	402968	101120	12199	0	0	0	0	0	0	0	0	0	4108	0	19280	9226	37333	18215	0	4652	58197	5298	32367	262509	78866	8864
	d__Bacteria;p__Firmicutes;c__Bacilli;o__Lactobacillales;f__Lactobacillaceae;g__Lactobacillus;s__Lactobacillus_paragasseri	Lactobacillus_paragasseri	0	0	118031	0	0	56978	224080	0	0	0	0	254546	0	0	0	0	0	0	0	0	0	0	0	0	0	2927	7607	3388	0	0	0	1258817	0	0	1849	0	0	0	0	0	0	0	0	0	8859	0	0
	d__Bacteria;p__Actinobacteriota;c__Actinomycetia;o__Actinomycetales;f__Bifidobacteriaceae;g__Bifidobacterium;s__Bifidobacterium_pseudocatenulatum	Bifidobacterium_pseudocatenulatum	577	37898	0	736	1049	741	349	0	4959	2587	0	47	22351	0	14498	1997	2063	29808	1098	1664	35497	1178	1452	473	0	740	661	579	200	873	24	148	115	0	0	2442	903	14758	10831	0	62965	0	2975	750	526	452	774
	d__Bacteria;p__Firmicutes_A;c__Clostridia;o__Lachnospirales;f__Lachnospiraceae;g__Agathobacter;s__Agathobacter_faecis	Agathobacter_faecis	0	0	0	1348	0	0	0	0	0	0	556	0	30615	30103	0	14467	0	0	16074	733	0	8885	22734	0	0	0	0	0	0	0	0	0	0	0	0	494	0	0	0	736	0	3124	0	0	0	0	0
	d__Bacteria;p__Bacteroidota;c__Bacteroidia;o__Bacteroidales;f__Bacteroidaceae;g__Bacteroides;s__Bacteroides_fluxus	Bacteroides_fluxus	0	2749	0	111	0	0	0	5041	0	0	5135	0	4253	11764	13282	0	4200	3618	2674	32278	0	5190	7465	13029	0	0	0	0	0	0	1891	0	0	1019	909	1567	6262	47740	4465	11852	584	5721	0	0	0	31274	61427
	d__Bacteria;p__Proteobacteria;c__Gammaproteobacteria;o__Enterobacterales;f__Pasteurellaceae;g__Haemophilus_D;s__Haemophilus_D_parainfluenzae_M	Haemophilus_D_parainfluenzae_M	0	40727	32520	0	42051	776	1684	0	0	0	3403	13503	335	0	0	715	0	0	1189	11544	2166	3740	39097	0	0	17392	0	0	0	3322	396	2201	7914	0	0	2337	0	0	1969	60287	25067	93	12556	7806	0	636	0
	d__Bacteria;p__Actinobacteriota;c__Actinomycetia;o__Actinomycetales;f__Bifidobacteriaceae;g__Bifidobacterium;s__Bifidobacterium_adolescentis	Bifidobacterium_adolescentis	5680	10531	2137	1949	6948	2063	3553	783	4148	7883	10014	782	5473	0	9159	5592	1482	10741	181	1287	13091	28641	1871	2615	422	1785	7127	5194	5326	15058	1977	1351	1569	0	4540	661	3251	6108	2736	196	40279	0	91162	2108	1414	8730	70652
	d__Bacteria;p__Bacteroidota;c__Bacteroidia;o__Bacteroidales;f__Bacteroidaceae;g__Prevotella;s__Prevotella_sp002297965	Prevotella_sp002297965	0	25407	0	0	0	0	0	0	0	0	216080	428	32285	79636	1734	0	3616	38957	36245	177230	23325	21663	80991	0	0	0	0	0	0	9041	0	0	0	0	0	0	7009	128191	110456	29578	28928	0	161946	0	0	1716	692
	d__Bacteria;p__Verrucomicrobiota;c__Verrucomicrobiae;o__Verrucomicrobiales;f__Akkermansiaceae;g__Akkermansia;s__Akkermansia_muciniphila_B	Akkermansia_muciniphila_B	0	0	0	0	0	0	0	0	0	0	9319	0	11241	536	0	0	445208	0	8783	229	0	24780	18553	0	0	0	0	4072	0	200202	0	0	176798	0	0	12158	1432	8901	0	57048	3967	1962	0	0	0	44669	81
	d__Bacteria;p__Firmicutes_C;c__Negativicutes;o__Veillonellales;f__Dialisteraceae;g__Dialister;s__Dialister_sp000434475	Dialister_sp000434475	0	115898	0	0	0	0	0	0	0	0	0	3180	106636	57532	13182	0	29780	161265	161779	48831	118566	99714	96259	0	0	0	0	0	0	0	0	0	0	0	0	50412	0	36054	0	0	340216	0	117885	0	0	0	0
	d__Bacteria;p__Proteobacteria;c__Gammaproteobacteria;o__Enterobacterales;f__Enterobacteriaceae;g__Klebsiella;s__Klebsiella_huaxiensis	Klebsiella_huaxiensis	15726	0	0	0	0	4508	0	0	2190	0	0	0	0	0	0	2678	0	0	0	0	0	0	0	0	288	0	0	0	17281	0	0	0	0	2105	0	0	0	0	0	0	0	0	0	0	0	0	0
	d__Bacteria;p__Firmicutes_A;c__Clostridia;o__Lachnospirales;f__Lachnospiraceae;g__Lachnospira;s__Lachnospira_sp000437735	Lachnospira_sp000437735	0	0	0	0	0	0	0	0	0	0	0	0	0	0	0	0	0	0	0	0	0	0	112	0	0	0	0	0	0	0	0	0	0	0	0	227479	0	0	0	0	0	0	0	0	0	0	0
	d__Bacteria;p__Firmicutes_A;c__Clostridia;o__Clostridiales;f__Clostridiaceae;g__Clostridium;s__Clostridium_sp018372875	Clostridium_sp018372875	0	0	0	0	0	0	0	0	0	0	0	0	0	0	0	0	0	0	0	0	0	0	0	0	1523254	0	0	0	0	0	0	0	0	0	0	0	0	0	0	0	0	0	0	0	0	0	0
	d__Bacteria;p__Bacteroidota;c__Bacteroidia;o__Bacteroidales;f__Bacteroidaceae;g__Bacteroides;s__Bacteroides_salyersiae	Bacteroides_salyersiae	0	5548	0	0	0	0	0	10247	0	0	6893	0	7608	1828	5820	0	8491	3999	1182	11464	0	7765	9306	21943	0	0	0	0	0	0	14014	0	0	989	430	7727	11165	42468	4541	15156	0	10076	0	0	0	14321	6955
	d__Bacteria;p__Firmicutes_A;c__Clostridia;o__Oscillospirales;f__Ruminococcaceae;g__Gemmiger;s__Gemmiger_formicilis	Gemmiger_formicilis	0	0	0	0	0	0	0	0	0	0	1727	0	63363	7691	30481	0	0	49532	64019	2729	29428	3321	33399	0	0	0	0	0	0	0	0	0	0	0	0	0	0	75767	453	0	1724	3641	13912	0	0	63424	70631
	d__Bacteria;p__Bacteroidota;c__Bacteroidia;o__Bacteroidales;f__Bacteroidaceae;g__Prevotella;s__Prevotella_sp900556795	Prevotella_sp900556795	0	4534	0	0	0	0	0	0	0	0	82158	0	32628	1023449	0	0	4886	20891	4759	9633	1538	6908	12973	0	0	0	0	0	0	0	0	0	0	0	0	0	512	62994	17163	7580	3925	0	75744	0	0	0	0
	d__Bacteria;p__Bacteroidota;c__Bacteroidia;o__Bacteroidales;f__Bacteroidaceae;g__Prevotella;s__Prevotella_sp002440225	Prevotella_sp002440225	0	16897	0	0	0	0	0	0	0	0	137846	1034	32228	52373	1435	0	4631	32697	17867	90257	13863	14804	47921	0	0	0	0	0	0	5799	0	0	0	0	0	0	5526	92412	86249	16705	27558	0	132328	0	0	4307	2087
	d__Bacteria;p__Bacteroidota;c__Bacteroidia;o__Bacteroidales;f__Bacteroidaceae;g__Bacteroides;s__Bacteroides_clarus	Bacteroides_clarus	0	0	0	0	0	0	0	0	0	0	1679	0	0	1000	1226	0	0	0	0	27811	0	562	5153	0	0	0	0	0	0	0	0	0	0	0	0	0	0	60125	5844	45	0	0	0	0	0	2671	4960
	d__Bacteria;p__Bacteroidota;c__Bacteroidia;o__Bacteroidales;f__Bacteroidaceae;g__Bacteroides;s__Bacteroides_cutis	Bacteroides_cutis	0	5387	0	3467	0	0	0	9106	0	0	6269	0	7284	5492	11075	0	7871	4839	1479	22053	0	8361	7856	17644	0	0	0	0	0	0	12939	0	0	3285	764	7533	12405	36221	5447	18836	399	6407	0	0	0	15577	22382
	d__Bacteria;p__Bacteroidota;c__Bacteroidia;o__Bacteroidales;f__UBA932;g__Cryptobacteroides;s__Cryptobacteroides_sp000433355	Cryptobacteroides_sp000433355	0	3162	0	0	0	0	0	0	0	0	156394	0	0	1159769	0	0	0	0	0	0	75604	10197	38558	0	0	0	0	0	0	0	0	0	0	0	0	0	0	0	0	0	0	0	0	0	0	0	0
	d__Bacteria;p__Actinobacteriota;c__Actinomycetia;o__Actinomycetales;f__Bifidobacteriaceae;g__Bifidobacterium;s__Bifidobacterium_scaligerum	Bifidobacterium_scaligerum	58646	13209	36813	16498	108530	33798	34000	18424	38959	52870	0	3414	3912	0	15162	30693	2619	11317	0	0	10069	0	358	20409	0	48348	68059	66082	73555	34246	17206	22999	13922	1086	78418	1868	47085	1312	715	2041	30108	582	2793	15104	11424	11056	4522
	d__Bacteria;p__Firmicutes_A;c__Clostridia;o__Oscillospirales;f__Acutalibacteraceae;g__Ruminococcus_E;s__Ruminococcus_E_bromii_B	Ruminococcus_E_bromii_B	0	0	0	0	0	0	0	0	0	0	14394	0	245	22144	0	0	0	0	1586	35656	0	0	0	0	0	0	0	0	0	0	0	0	0	0	0	0	0	74646	94181	0	0	27614	0	0	0	0	12557
	d__Bacteria;p__Firmicutes_A;c__Clostridia;o__Lachnospirales;f__Lachnospiraceae;g__Roseburia;s__Roseburia_hominis	Roseburia_hominis	0	0	0	0	0	0	0	0	0	0	31447	0	49932	5914	4174	0	0	0	2581	93053	8869	11117	216433	0	0	0	0	0	0	0	0	0	0	0	0	444544	0	1986	8321	24355	0	14625	0	0	0	0	0
	d__Bacteria;p__Bacteroidota;c__Bacteroidia;o__Bacteroidales;f__Bacteroidaceae;g__Bacteroides;s__Bacteroides_sp910586915	Bacteroides_sp910586915	0	8441	0	15827	0	0	0	863	0	0	22822	0	14267	5037	12962	0	429	11733	2331	21498	0	24417	15203	48939	0	0	0	0	0	0	771	0	0	3414	235	484	21361	19123	8556	36202	436	1843	0	0	0	11681	5978
	d__Bacteria;p__Firmicutes_A;c__Clostridia;o__Lachnospirales;f__Lachnospiraceae;g__Copromonas;s__Copromonas_sp900066535	Copromonas_sp900066535	0	34120	0	0	0	0	0	0	0	0	5339	0	15069	2162	1803	141193	23229	3369	1021	9434	9764	1039	13353	28845	0	0	0	0	0	0	0	0	0	0	0	573757	52571	2203	9415	0	587	42694	7723	40797	11619	17886	0
	d__Bacteria;p__Firmicutes;c__Bacilli;o__Lactobacillales;f__Streptococcaceae;g__Streptococcus;s__Streptococcus_thermophilus	Streptococcus_thermophilus	9166	8664	28035	3865	1296	13363	26415	0	177165	1146	0	4995	1289	1718	12088	112265	0	873	0	0	0	0	1480	486	2429	4020	15545	1210	1123	1167	0	52979	793	6996	1978	930	0	0	0	0	3098	0	566	30109	4215	0	0
	d__Bacteria;p__Bacteroidota;c__Bacteroidia;o__Bacteroidales;f__Bacteroidaceae;g__Bacteroides;s__Bacteroides_pyogenes	Bacteroides_pyogenes	0	8358	0	16617	0	0	0	19289	0	0	9593	0	13868	4390	12359	0	12149	7151	1994	20542	0	13864	9820	31021	0	0	0	0	0	0	8877	0	0	4080	699	6028	22204	26837	6154	27108	325	10278	0	0	0	13751	11651
	d__Bacteria;p__Firmicutes_C;c__Negativicutes;o__Selenomonadales;f__Selenomonadaceae;g__Megamonas;s__Megamonas_funiformis	Megamonas_funiformis	0	0	0	0	0	0	0	0	0	0	0	0	0	0	0	0	0	0	0	11095	0	0	7470	0	0	0	0	0	0	0	0	0	0	0	0	0	0	20619	0	0	0	0	0	0	0	0	0
	d__Bacteria;p__Bacteroidota;c__Bacteroidia;o__Bacteroidales;f__Barnesiellaceae;g__Barnesiella;s__Barnesiella_intestinihominis	Barnesiella_intestinihominis	0	0	0	0	0	0	0	0	0	0	0	0	0	145776	417457	0	0	0	0	0	0	140373	0	0	0	0	0	0	0	0	0	0	0	9795	0	0	0	0	0	0	0	0	0	0	0	0	0
	d__Bacteria;p__Bacteroidota;c__Bacteroidia;o__Bacteroidales;f__UBA932;g__Cryptobacteroides;s__Cryptobacteroides_sp000435075	Cryptobacteroides_sp000435075	0	0	0	0	0	0	0	0	0	0	0	0	0	0	33732	0	0	609171	0	0	539848	607	0	0	0	0	0	0	0	0	0	0	0	0	0	0	0	0	0	0	0	0	95119	0	0	0	0
	d__Bacteria;p__Actinobacteriota;c__Actinomycetia;o__Actinomycetales;f__Bifidobacteriaceae;g__Bifidobacterium;s__Bifidobacterium_reuteri	Bifidobacterium_reuteri	73315	13309	23098	15860	95309	29197	32037	15734	33773	53936	0	3606	4777	0	11748	32020	2661	9645	0	0	8106	0	421	21679	0	63064	60599	50891	61622	32514	12434	14459	11615	485	65597	1829	37549	653	712	2144	28739	230	3181	14731	11545	9924	3893
	d__Bacteria;p__Firmicutes_A;c__Clostridia;o__Oscillospirales;f__Ruminococcaceae;g__Faecalibacterium;s__Faecalibacterium_prausnitzii_C	Faecalibacterium_prausnitzii_C	0	39001	0	1278	0	0	0	0	0	0	40064	0	19778	45144	1385	66809	0	9955	45222	8627	16608	40106	51718	5954	0	0	0	0	0	0	0	0	0	2043	0	9506	6094	172269	12068	0	3468	36600	3436	16804	146097	39640	4518
	d__Bacteria;p__Firmicutes_A;c__Clostridia;o__Clostridiales;f__Clostridiaceae;g__Clostridium_P;s__Clostridium_P_perfringens	Clostridium_P_perfringens	72668	0	0	0	0	6892	0	0	10064	0	0	0	0	0	0	0	0	0	0	0	0	0	0	0	669	0	0	0	0	0	0	4050	0	0	0	0	0	0	0	0	0	0	0	0	0	0	0
	d__Bacteria;p__Firmicutes_A;c__Clostridia;o__Lachnospirales;f__Lachnospiraceae;g__Anaerostipes;s__Anaerostipes_caccae	Anaerostipes_caccae	0	0	0	0	0	0	0	0	0	0	0	0	0	0	0	0	0	0	0	0	0	0	0	0	0	0	0	0	0	0	0	0	0	0	0	0	0	0	0	0	0	0	0	0	0	0	0
	d__Bacteria;p__Bacteroidota;c__Bacteroidia;o__Bacteroidales;f__Bacteroidaceae;g__Prevotella;s__Prevotella_sp900543975	Prevotella_sp900543975	0	39527	0	0	0	0	0	0	0	0	9917	0	155034	6202	0	0	0	201444	242	0	51926	1265	520	0	0	0	0	0	0	0	0	0	0	0	0	0	20598	1477	609	0	0	0	610707	0	0	0	0
	d__Bacteria;p__Firmicutes_A;c__Clostridia;o__Lachnospirales;f__Lachnospiraceae;g__Acetatifactor;s__Acetatifactor_intestinalis	Acetatifactor_intestinalis	0	0	0	0	0	0	0	0	0	0	52995	0	8547	14730	3919	0	0	0	126261	43863	6463	16160	176215	0	0	0	0	0	0	0	0	0	0	0	0	0	0	26179	0	0	0	288085	0	0	0	177126	28569
	d__Bacteria;p__Actinobacteriota;c__Actinomycetia;o__Actinomycetales;f__Micrococcaceae;g__Rothia;s__Rothia_sp902373285	Rothia_sp902373285	241719	14460	575067	0	35688	155	28740	1285	0	299	0	5956	0	0	0	0	0	0	0	0	0	0	0	0	35533	48809	168257	9317	1095	0	0	14733	13375	1697	146	0	0	0	0	0	14314	0	0	34954	896	0	0
	d__Bacteria;p__Firmicutes_A;c__Clostridia;o__Lachnospirales;f__Lachnospiraceae;g__Mediterraneibacter;s__Mediterraneibacter_faecis	Mediterraneibacter_faecis	0	15656	0	123	0	0	0	0	0	1421	40905	0	26371	56176	0	9546	6098	7900	15830	3120	19696	63928	47830	619	0	0	0	0	0	862	9026	0	0	0	0	4668	231	29823	13263	5252	8557	58573	18469	6411	50224	135710	9201
	d__Bacteria;p__Firmicutes_A;c__Clostridia;o__Lachnospirales;f__Lachnospiraceae;g__Ruminococcus_B;s__unknown	unknown	0	1240	0	5047	0	0	0	0	0	4202	0	0	0	0	0	0	0	0	0	0	0	1180	0	0	0	0	0	0	0	7993	1004	0	0	0	0	2001	0	0	0	0	0	0	0	340	401	499	0
	d__Bacteria;p__Actinobacteriota;c__Actinomycetia;o__Actinomycetales;f__Bifidobacteriaceae;g__Bifidobacterium;s__Bifidobacterium_dentium	Bifidobacterium_dentium	0	3366	0	3430	36	1012	0	0	14167	20476	0	0	1398	0	2119	11429	35	2312	0	0	2774	0	0	854	32106	2471	107	106	143	285	319	175	0	0	0	0	36	759	359	0	5327	0	983	1500	3633	0	500
	d__Bacteria;p__Actinobacteriota;c__Coriobacteriia;o__Coriobacteriales;f__Coriobacteriaceae;g__Collinsella;s__Collinsella_sp900556495	Collinsella_sp900556495	0	521	0	0	0	0	0	0	188	0	0	0	161	0	189	547130	137	426538	1116	0	77963	0	40994	0	0	0	0	0	0	116	0	0	0	0	0	0	23	0	0	0	23	0	0	0	0	0	0
	d__Bacteria;p__Bacteroidota;c__Bacteroidia;o__Bacteroidales;f__Bacteroidaceae;g__Bacteroides;s__Bacteroides_gallinarum	Bacteroides_gallinarum	0	215	0	0	0	0	0	0	0	0	3149	0	299	3684	3137	0	0	1382	295	39607	0	1240	9904	566	0	0	0	0	0	0	0	0	0	0	0	0	43	80374	7730	1481	0	0	0	0	0	8501	15738
	d__Bacteria;p__Bacteroidota;c__Bacteroidia;o__Bacteroidales;f__Bacteroidaceae;g__Prevotella;s__Prevotella_sp900556395	Prevotella_sp900556395	0	3814	0	0	0	0	0	0	0	0	351641	0	10049	28347	469	0	52781	11176	4731	6480	4421	3329	65982	0	0	0	0	0	0	339	0	0	0	0	0	0	1001	320654	99979	4557	5702	0	47986	0	0	635	38
	d__Bacteria;p__Firmicutes_C;c__Negativicutes;o__Veillonellales;f__Veillonellaceae;g__Veillonella_A;s__Veillonella_A_seminalis	Veillonella_A_seminalis	0	0	0	0	0	0	0	0	0	187644	0	0	0	0	0	0	0	0	0	0	0	0	0	0	0	0	0	0	0	0	90668	35549	0	0	0	0	0	0	0	0	0	0	0	0	0	0	0
	d__Bacteria;p__Bacteroidota;c__Bacteroidia;o__Bacteroidales;f__Tannerellaceae;g__Parabacteroides;s__Parabacteroides_goldsteinii	Parabacteroides_goldsteinii	0	440	0	0	0	0	0	0	0	0	11962	0	1173	0	0	0	0	0	0	0	0	142288	0	0	0	0	0	0	0	0	0	0	0	365	0	0	0	0	22364	0	0	418130	0	0	0	734	430
	d__Bacteria;p__Firmicutes_C;c__Negativicutes;o__Veillonellales;f__Megasphaeraceae;g__Anaeroglobus;s__Anaeroglobus_micronuciformis	Anaeroglobus_micronuciformis	0	901	0	0	0	848689	0	0	1483	330	0	0	0	0	0	0	0	0	0	0	0	0	0	0	0	0	0	0	0	0	0	0	0	0	0	6732	0	0	0	0	334	0	0	0	51102	0	0
	d__Bacteria;p__Firmicutes_A;c__Clostridia;o__Lachnospirales;f__Lachnospiraceae;g__Enterocloster;s__Enterocloster_sp001517625	Enterocloster_sp001517625	0	329	0	0	0	0	0	0	0	0	0	0	0	0	0	0	0	0	0	0	0	0	0	0	0	0	0	0	0	4279	0	0	0	0	0	1367	8065	0	0	0	0	0	0	1105	2492	2145	0
	d__Bacteria;p__Actinobacteriota;c__Coriobacteriia;o__Coriobacteriales;f__Eggerthellaceae;g__Eggerthella;s__Eggerthella_lenta	Eggerthella_lenta	0	0	0	12508	17135	0	0	3643	162612	49399	0	0	675	0	380	39762	45210	0	0	0	0	2422	0	25428	0	0	0	12819	0	34137	2775	1441	7102	0	0	0	53558	0	2253	0	0	1958	280	0	25228	6244	8681
	d__Bacteria;p__Bacteroidota;c__Bacteroidia;o__Bacteroidales;f__Bacteroidaceae;g__Bacteroides;s__Bacteroides_sp902388495	Bacteroides_sp902388495	0	1309	0	24	0	0	0	0	0	0	3326	0	1090	9945	8474	0	0	3099	2493	21594	0	2185	3117	3130	0	0	0	0	0	0	0	0	0	178	652	0	773	21401	1385	2057	479	708	0	0	0	22971	51971
	d__Bacteria;p__Firmicutes_A;c__Clostridia;o__Lachnospirales;f__Lachnospiraceae;g__Dorea_A;s__Dorea_A_longicatena_B	Dorea_A_longicatena_B	0	6564	0	0	0	0	0	0	52134	0	22048	0	65165	28537	0	316128	20888	35658	12348	33943	4650	3746	111729	12548	0	0	0	0	0	0	62343	0	17813	0	0	0	98	27457	12529	0	19767	12873	48186	0	0	172019	969
	d__Bacteria;p__Firmicutes_A;c__Clostridia;o__Lachnospirales;f__Lachnospiraceae;g__RUG115;s__RUG115_sp900066395	RUG115_sp900066395	0	0	0	0	0	0	0	0	0	0	29055	0	95065	40878	0	0	0	0	38055	10140	0	1232	559322	0	0	0	0	0	0	0	0	0	0	0	0	0	0	0	3410	0	0	34253	0	0	0	0	0
	d__Bacteria;p__Firmicutes_A;c__Clostridia;o__Oscillospirales;f__Ruminococcaceae;g__Ruthenibacterium;s__Ruthenibacterium_lactatiformans	Ruthenibacterium_lactatiformans	0	0	0	10587	0	0	0	0	0	0	0	0	478	2085	0	0	151370	25249	2450	0	0	1474	0	0	0	0	0	0	0	0	0	0	0	0	0	0	510246	7766	2708	15587	0	4749	0	0	0	4320	6177
	d__Bacteria;p__Bacteroidota;c__Bacteroidia;o__Bacteroidales;f__Bacteroidaceae;g__Bacteroides;s__Bacteroides_sp900765785	Bacteroides_sp900765785	0	10093	0	2390	0	0	0	0	0	0	28879	0	17539	3937	10140	0	0	4873	1040	22809	0	33019	15382	50267	0	0	0	0	0	0	0	0	0	2832	0	0	5715	8462	3321	33959	0	0	0	0	0	8725	1287
	d__Bacteria;p__Proteobacteria;c__Gammaproteobacteria;o__Enterobacterales;f__Enterobacteriaceae;g__Klebsiella;s__Klebsiella_variicola	Klebsiella_variicola	23789	0	0	0	0	4351	0	0	2672	0	0	0	0	0	0	2499	0	0	0	0	0	0	0	0	0	0	0	0	46700	0	0	0	0	2640	0	0	0	0	0	0	0	0	0	0	0	0	0
	d__Bacteria;p__Firmicutes_A;c__Clostridia;o__Lachnospirales;f__Lachnospiraceae;g__Eisenbergiella;s__Eisenbergiella_tayi	Eisenbergiella_tayi	0	0	0	0	0	0	0	0	0	0	0	0	0	0	28604	0	32746	0	0	0	0	839	0	0	0	0	0	0	0	0	0	0	0	0	0	0	0	0	0	0	0	0	0	0	0	74176	24664
	d__Bacteria;p__Proteobacteria;c__Gammaproteobacteria;o__Enterobacterales;f__Enterobacteriaceae;g__Klebsiella;s__Klebsiella_grimontii	Klebsiella_grimontii	0	0	0	0	0	0	0	0	0	0	0	0	0	0	0	0	0	0	0	0	0	0	0	0	0	0	0	0	0	0	0	0	0	0	0	0	0	0	0	0	0	0	0	0	0	0	0
	d__Bacteria;p__Actinobacteriota;c__Actinomycetia;o__Actinomycetales;f__Bifidobacteriaceae;g__Bifidobacterium;s__Bifidobacterium_myosotis	Bifidobacterium_myosotis	60796	10138	23296	15458	82739	30612	30102	15267	29028	54731	0	3052	3500	0	12941	31034	2698	8943	0	0	7101	0	142	20929	0	37131	50500	48789	65363	30517	11827	13900	10870	699	66646	1005	36393	399	530	2220	27258	348	2683	14015	11037	10697	3505
	d__Bacteria;p__Proteobacteria;c__Gammaproteobacteria;o__Enterobacterales;f__Enterobacteriaceae;g__Citrobacter_B;s__Citrobacter_B_koseri	Citrobacter_B_koseri	3903	15182	9050	898	9473	624	16864	1282	24136	5695	0	4427	8513	0	0	9044	6351	3007	0	1835	0	0	0	2840	19825	0	18811	15604	17965	2795	27189	21761	29037	41592	222	4507	2245	0	851	14909	681	0	0	30841	5519	1493	0
	d__Bacteria;p__Proteobacteria;c__Gammaproteobacteria;o__Enterobacterales;f__Enterobacteriaceae;g__Klebsiella;s__Klebsiella_africana	Klebsiella_africana	94821	0	0	0	0	32240	0	0	5460	0	0	0	0	0	0	7098	0	0	0	0	0	0	0	0	847	0	0	0	113414	0	0	0	0	6856	0	0	0	0	0	0	0	0	0	0	0	0	0
	d__Bacteria;p__Bacteroidota;c__Bacteroidia;o__Bacteroidales;f__Muribaculaceae;g__Limisoma;s__Limisoma_sp000437795	Limisoma_sp000437795	0	28141	0	0	0	0	0	0	0	0	380426	0	143275	0	0	0	0	378010	0	0	15999	0	0	0	0	0	0	0	0	0	0	0	0	0	0	0	0	0	0	0	0	0	43383	0	0	0	0
	d__Bacteria;p__Bacteroidota;c__Bacteroidia;o__Bacteroidales;f__Bacteroidaceae;g__Bacteroides;s__Bacteroides_sp003545565	Bacteroides_sp003545565	0	206	0	0	0	0	0	0	0	0	2959	0	644	1231	2172	0	0	372	578	33577	0	1087	7124	1862	0	0	0	0	0	0	0	0	0	0	0	0	281	66037	4507	2203	0	0	0	0	0	5563	7920
	d__Bacteria;p__Bacteroidota;c__Bacteroidia;o__Bacteroidales;f__Bacteroidaceae;g__Prevotella;s__Prevotella_stercorea	Prevotella_stercorea	0	92957	0	0	0	0	0	0	0	0	25192	0	16234	756607	0	0	0	80101	0	0	1512	85	0	0	0	0	0	0	0	0	0	0	0	0	0	0	0	0	0	0	0	0	34735	0	0	0	0
	d__Bacteria;p__Firmicutes_A;c__Clostridia;o__Lachnospirales;f__Lachnospiraceae;g__Fusicatenibacter;s__Fusicatenibacter_saccharivorans	Fusicatenibacter_saccharivorans	0	0	0	0	0	0	0	0	0	0	10055	0	11472	3484	0	0	0	0	0	3733	0	17578	4519	0	0	0	0	0	0	0	0	0	0	0	0	0	0	3368	13583	0	0	17960	2625	0	0	3891	2697
	d__Bacteria;p__Bacteroidota;c__Bacteroidia;o__Bacteroidales;f__Bacteroidaceae;g__Bacteroides;s__Bacteroides_sp910585845	Bacteroides_sp910585845	0	3317	0	1154	0	0	0	327	0	0	6615	0	4881	5181	7863	0	1225	2966	1301	20598	0	7652	6623	7186	0	0	0	0	0	0	635	0	0	1271	74	367	8395	28794	4649	9650	140	1108	0	0	0	14470	22516
	d__Bacteria;p__Proteobacteria;c__Gammaproteobacteria;o__Burkholderiales;f__Burkholderiaceae;g__Duodenibacillus;s__Duodenibacillus_massiliensis	Duodenibacillus_massiliensis	0	0	0	0	0	0	0	0	0	0	1552	0	0	0	1275	0	50550	0	6882	0	4834	514	643	0	0	0	0	0	0	0	0	0	0	0	0	726815	18313	12077	0	45996	52624	52934	1666	0	0	0	0
	d__Bacteria;p__Firmicutes_C;c__Negativicutes;o__Veillonellales;f__Megasphaeraceae;g__Megasphaera;s__Megasphaera_stantonii	Megasphaera_stantonii	0	86547	0	4445	0	0	0	0	14058	69372	0	0	49690	0	2755	26328	15006	7770	0	1219	8239	0	0	32325	0	0	0	43605	0	117411	14557	2593	7971	0	0	12300	7623	0	0	32924	156832	0	39089	184720	64443	3515	234
	d__Bacteria;p__Bacteroidota;c__Bacteroidia;o__Bacteroidales;f__Bacteroidaceae;g__Bacteroides;s__Bacteroides_reticulotermitis	Bacteroides_reticulotermitis	0	6465	0	11316	0	0	0	18	0	0	7380	0	11909	4079	10004	0	240	3198	1662	16757	0	13979	9851	41157	0	0	0	0	0	0	1418	0	0	3516	457	1046	17651	13870	7619	23883	412	1273	0	0	0	8073	4934
	d__Bacteria;p__Firmicutes_A;c__Clostridia;o__Lachnospirales;f__Lachnospiraceae;g__Ruminococcus_B;s__Ruminococcus_B_sp900544395	Ruminococcus_B_sp900544395	0	584	0	9270	0	0	0	0	0	3766	0	0	0	0	0	0	0	0	0	0	0	562	0	0	0	0	0	0	0	6124	411	0	0	0	0	1993	0	0	0	0	0	0	0	0	0	136	0
	d__Bacteria;p__Proteobacteria;c__Gammaproteobacteria;o__Enterobacterales;f__Enterobacteriaceae;g__Pluralibacter;s__Pluralibacter_gergoviae	Pluralibacter_gergoviae	54091	750	93	0	1016	16921	416	46	8907	282	0	0	47	0	0	6908	47	0	0	0	0	0	0	608	3448	0	612	328	65475	0	1076	1357	1342	11977	0	0	0	0	0	518	0	0	0	1434	0	368	0
	d__Bacteria;p__Bacteroidota;c__Bacteroidia;o__Bacteroidales;f__Bacteroidaceae;g__Bacteroides;s__Bacteroides_heparinolyticus	Bacteroides_heparinolyticus	0	1150	0	0	0	0	0	0	0	0	3193	0	2346	7846	5845	0	125	4342	1788	17803	0	2909	3532	5615	0	0	0	0	0	0	93	0	0	123	306	0	1458	19653	1261	4248	31	281	0	0	0	15190	34253
	d__Bacteria;p__Bacteroidota;c__Bacteroidia;o__Bacteroidales;f__Bacteroidaceae;g__Bacteroides;s__Bacteroides_congonensis	Bacteroides_congonensis	0	7161	0	0	0	0	0	0	0	0	28944	0	14329	4169	5824	0	0	5169	1503	18316	0	31758	14799	36148	0	0	0	0	0	0	0	0	0	360	0	0	4971	1910	7505	18395	0	0	0	0	0	4288	1537
	d__Bacteria;p__Firmicutes_A;c__Clostridia;o__UBA1381;f__UBA1381;g__CAG-41;s__CAG-41_sp900066215	CAG-41_sp900066215	0	0	0	0	0	0	0	0	0	0	1382	0	0	1887	0	0	0	0	0	7265	0	836	0	0	0	0	0	0	0	0	0	0	0	0	0	72271	0	0	0	0	0	90057	0	0	0	9980	163
	d__Bacteria;p__Firmicutes_A;c__Clostridia;o__Lachnospirales;f__Lachnospiraceae;g__Mediterraneibacter;s__Mediterraneibacter_lactaris	Mediterraneibacter_lactaris	0	491	0	0	0	0	0	0	0	113	1514	0	1443	3032	0	407	0	135	2058	56	0	58142	2516	0	0	0	0	0	0	456	85	0	0	0	0	396	376	26918	1523	0	0	19817	491	0	992	5676	246
	d__Bacteria;p__Firmicutes_A;c__Clostridia;o__Oscillospirales;f__Ruminococcaceae;g__Faecalibacterium;s__Faecalibacterium_sp900758465	Faecalibacterium_sp900758465	0	25900	0	345	0	0	0	0	0	0	77258	0	14035	21596	789	77858	0	10179	6337	5377	9388	12545	64478	6060	0	0	0	0	0	0	0	0	0	2691	0	7957	5991	12087	13365	0	1466	16220	3611	12497	117780	35388	3718
	d__Bacteria;p__Firmicutes_A;c__Clostridia;o__Lachnospirales;f__Lachnospiraceae;g__Blautia_A;s__Blautia_A_massiliensis	Blautia_A_massiliensis	0	0	0	0	0	0	0	0	0	0	0	0	0	354	41178	0	0	18753	0	3385	0	10649	988	0	0	0	0	0	0	239823	929	0	0	0	0	0	0	22958	15735	0	64	3494	37167	0	0	0	0
	d__Bacteria;p__Firmicutes_A;c__Clostridia;o__Lachnospirales;f__Lachnospiraceae;g__Dorea;s__Dorea_formicigenerans	Dorea_formicigenerans	0	13949	0	0	0	0	0	0	107	40956	3650	0	50128	6672	31803	50404	7555	15261	7689	4845	6366	12126	53999	15179	0	0	0	0	0	41773	36	0	761	0	0	21131	115884	4905	11065	0	3556	6468	6220	156996	15528	14712	4695
	d__Bacteria;p__Bacteroidota;c__Bacteroidia;o__Bacteroidales;f__Bacteroidaceae;g__Phocaeicola;s__Phocaeicola_sp900542985	Phocaeicola_sp900542985	0	1107	0	0	0	0	0	0	0	0	1530	0	3028	406	3616	0	263	1412	358	4311	0	2456	1755	6027	0	0	0	0	0	0	203	0	0	3776	0	88	1277	428873	1282	8273	0	3351	0	0	0	4408	5644
	d__Bacteria;p__Bacteroidota;c__Bacteroidia;o__Bacteroidales;f__Bacteroidaceae;g__Prevotella;s__Prevotella_sp900546535	Prevotella_sp900546535	0	6289	0	0	0	0	0	0	0	0	67210	0	11184	65320	572	0	39220	11778	5805	12274	29428	21802	14153	0	0	0	0	0	0	1804	0	0	0	0	0	0	377	39430	23699	2117	6853	0	348400	0	0	0	0
	d__Bacteria;p__Bacteroidota;c__Bacteroidia;o__Bacteroidales;f__Bacteroidaceae;g__Prevotella;s__Prevotella_sp003447235	Prevotella_sp003447235	0	0	0	0	0	0	0	0	0	0	0	0	69	210	0	0	0	344942	0	0	174248	73788	0	0	0	0	0	0	0	0	0	0	0	0	0	0	0	0	0	0	0	0	65666	0	0	0	0
	d__Bacteria;p__Bacteroidota;c__Bacteroidia;o__Bacteroidales;f__Bacteroidaceae;g__Prevotella;s__Prevotella_sp900552515	Prevotella_sp900552515	0	0	0	0	0	0	0	0	0	0	804	0	718	1627	0	0	6472	154837	0	0	322756	836	0	0	0	0	0	0	0	0	0	0	0	0	0	0	3361	0	0	0	0	0	7275	0	0	0	0
	d__Bacteria;p__Firmicutes_C;c__Negativicutes;o__Veillonellales;f__Veillonellaceae;g__Veillonella;s__Veillonella_caviae	Veillonella_caviae	1153	18657	24653	0	0	34903	137333	0	2364	72	662	18435	0	0	0	309	0	0	0	321	387	1121	3456	0	0	233	538	0	0	0	1041	7534	12	0	0	5097	0	0	199	2189	10335	73	319	5744	10950	0	0
	d__Bacteria;p__Bacteroidota;c__Bacteroidia;o__Bacteroidales;f__Bacteroidaceae;g__Prevotella;s__Prevotella_buccae	Prevotella_buccae	0	144	0	0	0	0	0	0	0	0	3789	0	1559	2223	0	4065	478	2129	256	0	1676	206	614	0	0	0	0	0	0	0	58229	67431	0	0	0	97286	146	3133	2292	282	72	32245	8281	0	62522	0	0
	d__Bacteria;p__Firmicutes_C;c__Negativicutes;o__Veillonellales;f__Veillonellaceae;g__Veillonella;s__Veillonella_tobetsuensis	Veillonella_tobetsuensis	407	20041	45165	0	0	26101	175835	0	338	0	566	25731	0	0	0	50	0	0	0	0	0	210	2888	0	0	73	365	0	0	0	547	12814	0	0	0	5151	0	0	0	908	12508	0	0	3004	13154	0	0
	d__Bacteria;p__Firmicutes_A;c__Clostridia;o__Oscillospirales;f__Ruminococcaceae;g__Faecalibacterium;s__Faecalibacterium_sp900539945	Faecalibacterium_sp900539945	0	18957	0	321	0	0	0	0	0	0	26652	0	8797	24377	36	27204	0	4766	4253	5997	5789	33533	33682	2492	0	0	0	0	0	0	0	0	0	621	0	3969	2124	22692	9829	0	608	12802	935	7063	61000	18569	2394
	d__Bacteria;p__Firmicutes_A;c__Clostridia;o__Lachnospirales;f__Lachnospiraceae;g__COE1;s__COE1_sp001916965	COE1_sp001916965	0	0	0	0	0	0	0	0	0	0	8375	0	0	9530	0	0	0	0	164018	0	0	2863	0	0	0	0	0	0	0	0	0	0	0	0	0	0	0	0	0	0	0	137246	0	0	0	0	0
	d__Bacteria;p__Firmicutes_C;c__Negativicutes;o__Veillonellales;f__Megasphaeraceae;g__Caecibacter;s__Caecibacter_sp003467125	Caecibacter_sp003467125	0	437	0	73659	0	0	0	0	39	103055	0	0	52228	0	66237	61923	6126	8803	0	0	5655	2069	20178	0	0	0	0	396	0	135947	46548	0	7060	0	0	196	25982	0	9643	98699	21591	1535	6972	591	10731	0	39
	d__Bacteria;p__Actinobacteriota;c__Actinomycetia;o__Actinomycetales;f__Bifidobacteriaceae;g__Bifidobacterium;s__Bifidobacterium_mongoliense	Bifidobacterium_mongoliense	25413	11865	14102	10959	45155	20745	28389	7213	19945	42993	0	5403	4933	0	11981	28402	2860	10265	0	0	7476	61	452	13329	0	12688	43281	31782	31988	15289	11449	10171	8287	225	28344	1027	25477	646	1368	1985	26940	284	2962	11607	7640	7010	3074
	d__Bacteria;p__Proteobacteria;c__Gammaproteobacteria;o__Burkholderiales;f__Burkholderiaceae;g__Parasutterella;s__Parasutterella_excrementihominis	Parasutterella_excrementihominis	0	0	0	0	0	0	0	0	0	0	0	0	0	0	0	0	0	0	0	0	0	0	0	0	0	0	0	0	0	0	0	0	0	0	0	0	0	0	0	0	0	0	0	0	0	0	0
	d__Bacteria;p__Firmicutes_A;c__Clostridia;o__Lachnospirales;f__Lachnospiraceae;g__Faecalimonas;s__Faecalimonas_phoceensis	Faecalimonas_phoceensis	0	0	0	0	0	0	0	0	0	0	0	0	0	0	0	0	0	359	0	0	0	0	0	41772	0	0	0	0	0	129036	0	0	0	0	0	0	0	0	0	0	0	0	0	0	0	0	0
	d__Bacteria;p__Firmicutes_A;c__Clostridia;o__Oscillospirales;f__Ruminococcaceae;g__Ruminococcus_D;s__Ruminococcus_D_bicirculans	Ruminococcus_D_bicirculans	0	0	0	0	0	0	0	0	0	0	0	0	0	0	0	0	0	0	0	29942	0	8745	0	0	0	0	0	0	0	0	0	0	0	0	0	1264	0	0	0	0	0	157582	0	0	0	0	0
	d__Bacteria;p__Firmicutes_A;c__Clostridia;o__Lachnospirales;f__Lachnospiraceae;g__Hungatella;s__Hungatella_effluvii	Hungatella_effluvii	0	0	0	0	0	0	0	0	0	76269	0	0	0	0	1531	0	167	0	0	0	0	0	0	0	14389	0	0	0	0	0	0	0	0	0	0	54	0	0	0	32148	0	6669	0	0	0	2567	1107
	d__Bacteria;p__Firmicutes_A;c__Clostridia;o__Lachnospirales;f__Lachnospiraceae;g__Enterocloster;s__Enterocloster_sp900541315	Enterocloster_sp900541315	0	29573	0	0	0	0	0	23320	0	18626	507	39573	24774	2853	0	27916	765	16361	257	5823	8172	0	15445	20631	0	0	0	0	0	116216	28419	0	0	0	0	109504	0	6518	16739	5916	45006	1405	6241	0	0	50121	0
	d__Bacteria;p__Firmicutes_C;c__Negativicutes;o__Acidaminococcales;f__Acidaminococcaceae;g__Acidaminococcus;s__Acidaminococcus_massiliensis	Acidaminococcus_massiliensis	0	0	0	10768	0	0	0	0	0	34153	0	0	12749	0	90651	294053	11200	4187	0	0	467	0	0	0	0	0	0	0	0	7748	3832	9169	37020	0	0	7486	3295	0	0	80201	33111	286	4275	0	92789	0	0
	d__Bacteria;p__Firmicutes_A;c__Clostridia;o__Lachnospirales;f__Lachnospiraceae;g__Blautia_A;s__Blautia_A_sp003471165	Blautia_A_sp003471165	0	5372	0	2433	0	0	0	0	0	5248	31869	0	3884	3864	730	6661	5139	7576	942	876	0	24595	2698	1656	0	0	0	0	0	0	0	0	0	0	0	3014	9247	3588	17064	0	0	636	5517	3839	4736	7426	5007
	d__Bacteria;p__Proteobacteria;c__Gammaproteobacteria;o__Enterobacterales;f__Enterobacteriaceae;g__Enterobacter;s__Enterobacter_cloacae	Enterobacter_cloacae	610	0	0	0	0	0	0	0	677	0	0	0	0	0	0	332	0	0	0	0	0	0	0	0	12363	0	0	0	37723	0	0	0	0	1201	0	0	0	0	0	0	0	0	0	0	0	594	0
	d__Bacteria;p__Actinobacteriota;c__Actinomycetia;o__Actinomycetales;f__Bifidobacteriaceae;g__Bifidobacterium;s__Bifidobacterium_sp002451435	Bifidobacterium_sp002451435	9619	23580	3163	5558	23082	11253	15588	1374	9365	22325	0	3314	12457	0	16816	17513	3455	21511	99	822	20527	2002	1247	5668	618	7480	24003	13003	15215	6665	5440	5671	4296	0	5413	1781	12058	8220	5780	1207	64270	0	8035	4993	3995	3066	6648
	d__Bacteria;p__Firmicutes_A;c__Clostridia;o__Lachnospirales;f__Lachnospiraceae;g__Blautia_A;s__Blautia_A_sp000285855	Blautia_A_sp000285855	0	1517	0	908	0	0	0	0	0	2195	1472	0	2046	1745	969	3253	1977	2762	1122	587	0	9861	1289	988	0	0	0	0	0	752	0	0	0	0	0	742	3072	1494	4637	0	0	346	2414	1743	2042	2351	2630
	d__Bacteria;p__Bacteroidota;c__Bacteroidia;o__Bacteroidales;f__Bacteroidaceae;g__Prevotella;s__Prevotella_sp002300055	Prevotella_sp002300055	0	41	0	0	0	0	0	0	0	0	444	0	688	837	0	0	0	1030	0	0	406	0	0	0	0	0	0	0	0	0	0	0	0	0	0	0	0	288	0	0	0	0	1957	0	0	0	0
	d__Bacteria;p__Firmicutes_A;c__Clostridia;o__Oscillospirales;f__Ruminococcaceae;g__Faecalibacterium;s__Faecalibacterium_sp900540455	Faecalibacterium_sp900540455	0	22670	0	275	0	0	0	0	0	0	18414	0	10777	13824	559	43304	0	5182	6520	4708	7156	28472	39914	3620	0	0	0	0	0	0	0	0	0	905	0	5825	3157	19010	9372	0	1867	11969	1618	9455	90611	26090	2783
	d__Bacteria;p__Proteobacteria;c__Gammaproteobacteria;o__Enterobacterales;f__Enterobacteriaceae;g__Klebsiella;s__Klebsiella_oxytoca_C	Klebsiella_oxytoca_C	0	0	0	0	0	0	0	0	0	0	0	0	0	0	0	0	0	0	0	0	0	0	0	0	0	0	0	0	0	0	0	0	0	0	0	0	0	0	0	0	0	0	0	0	0	0	0
	d__Bacteria;p__Bacteroidota;c__Bacteroidia;o__Bacteroidales;f__Bacteroidaceae;g__Alloprevotella;s__Alloprevotella_sp900540885	Alloprevotella_sp900540885	0	0	0	0	0	0	0	0	0	0	0	0	0	0	0	0	0	52626	0	0	0	0	0	0	0	0	0	0	0	0	0	0	0	0	0	0	0	0	0	0	0	0	28	0	0	0	0
	d__Bacteria;p__Actinobacteriota;c__Actinomycetia;o__Actinomycetales;f__Bifidobacteriaceae;g__Bifidobacterium;s__Bifidobacterium_scardovii	Bifidobacterium_scardovii	4887	7801	314	73940	18824	12103	17129	347	7934	29390	0	3880	3039	0	12640	31210	1815	8670	0	0	5089	0	307	6289	0	5128	23294	13399	13125	6384	6040	3941	2968	0	77	345	24271	0	664	1360	21106	0	2164	13535	13269	3022	3521
	d__Bacteria;p__Bacteroidota;c__Bacteroidia;o__Bacteroidales;f__Bacteroidaceae;g__Bacteroides;s__Bacteroides_stercorirosoris	Bacteroides_stercorirosoris	0	0	0	0	0	0	0	0	0	0	5896	0	238	1231	2483	0	0	0	0	10138	0	9276	3943	1012	0	0	0	0	0	0	0	0	0	0	0	0	0	9036	1253	495	0	0	0	0	0	3767	6334
	d__Bacteria;p__Firmicutes_A;c__Clostridia;o__Oscillospirales;f__Acutalibacteraceae;g__Clostridium_E;s__Clostridium_E_jeddahense	Clostridium_E_jeddahense	0	0	0	0	0	0	0	0	0	0	0	0	0	0	0	0	0	0	0	0	0	0	0	0	0	0	0	0	0	0	0	0	0	0	0	0	0	0	0	0	0	0	0	0	0	0	0
	d__Bacteria;p__Bacteroidota;c__Bacteroidia;o__Bacteroidales;f__Bacteroidaceae;g__Prevotella;s__Prevotella_sp900546575	Prevotella_sp900546575	0	0	0	0	0	0	0	0	0	0	332	0	565	0	0	0	0	380939	0	0	26511	322	0	0	0	0	0	0	0	0	0	0	0	0	0	0	18768	0	0	0	0	0	6955	0	0	0	0
	d__Bacteria;p__Firmicutes;c__Bacilli;o__Lactobacillales;f__Lactobacillaceae;g__Lactobacillus;s__Lactobacillus_gasseri	Lactobacillus_gasseri	0	0	26748	0	0	8973	48420	0	0	0	0	49368	0	0	0	0	0	0	0	0	0	0	0	0	0	108742	618	1116	0	0	0	229879	0	0	16742	0	0	0	0	0	0	0	0	0	149002	0	0
	d__Bacteria;p__Proteobacteria;c__Gammaproteobacteria;o__Enterobacterales;f__Enterobacteriaceae;g__Enterobacter;s__Enterobacter_hormaechei_A	Enterobacter_hormaechei_A	0	0	0	0	0	0	0	0	0	0	0	0	0	0	0	0	0	0	0	0	0	0	0	0	3872	0	0	0	384509	0	0	0	0	0	0	0	0	0	0	0	0	0	0	0	0	0	0
	d__Bacteria;p__Firmicutes_C;c__Negativicutes;o__Veillonellales;f__Veillonellaceae;g__Veillonella;s__Veillonella_denticariosi	Veillonella_denticariosi	781	10199	6122	0	0	33147	72669	0	3347	148	505	8761	0	0	0	399	0	0	0	329	280	1025	2306	0	0	0	259	0	0	0	1264	4094	0	0	0	3618	0	0	186	3204	13132	10	290	5500	7453	0	0
	d__Bacteria;p__Proteobacteria;c__Gammaproteobacteria;o__Enterobacterales;f__Enterobacteriaceae;g__Citrobacter;s__Citrobacter_freundii	Citrobacter_freundii	0	0	0	0	0	0	0	0	0	0	0	0	0	0	0	0	0	0	0	0	0	0	0	0	0	0	0	0	37087	0	0	0	0	0	0	0	0	0	0	0	0	0	0	0	0	0	0
	d__Bacteria;p__Firmicutes;c__Bacilli;o__Lactobacillales;f__Enterococcaceae;g__Enterococcus_A;s__Enterococcus_A_raffinosus	Enterococcus_A_raffinosus	0	0	0	0	26219	0	0	0	45426	13282	0	0	0	0	0	1472	0	0	0	0	0	0	0	37632	0	0	0	1665	198663	5872	9792	14759	1663	929	0	0	25673	0	0	0	0	0	0	0	0	0	0
	d__Bacteria;p__Actinobacteriota;c__Actinomycetia;o__Actinomycetales;f__Bifidobacteriaceae;g__Bifidobacterium;s__Bifidobacterium_saguini	Bifidobacterium_saguini	40246	7317	8032	7150	28414	14540	12085	5870	15801	24447	0	984	2461	0	7004	15562	1159	4988	0	0	3938	0	16	9320	0	43729	29248	25106	24972	16620	5499	7340	3899	218	24300	786	17044	404	443	830	16859	66	1579	7506	5410	5959	1550
	d__Bacteria;p__Firmicutes_A;c__Clostridia;o__Lachnospirales;f__Lachnospiraceae;g__Lachnospira;s__Lachnospira_sp900316325	Lachnospira_sp900316325	0	0	0	0	0	0	0	0	0	0	0	0	0	3198	0	0	0	117	0	0	0	230	20533	0	0	0	0	0	0	0	0	0	0	0	0	1735	0	0	0	0	0	153	0	0	0	0	0
	d__Bacteria;p__Firmicutes_A;c__Clostridia;o__Oscillospirales;f__Oscillospiraceae;g__ER4;s__ER4_sp000765235	ER4_sp000765235	0	0	0	0	0	0	0	0	0	0	105147	0	0	85860	0	0	0	0	37715	0	60529	245385	0	0	0	0	0	0	0	0	0	0	0	0	0	0	0	31439	0	0	0	14718	0	0	0	0	0
	d__Bacteria;p__Firmicutes_A;c__Clostridia;o__Clostridiales;f__Clostridiaceae;g__Clostridium;s__Clostridium_sp900540255	Clostridium_sp900540255	0	0	0	42	0	0	0	0	0	6782	0	0	1797	2905	0	0	0	0	0	0	0	864	39411	0	7154	0	0	0	0	0	0	0	0	0	0	0	0	0	0	0	0	0	787	0	0	0	0
	d__Bacteria;p__Bacteroidota;c__Bacteroidia;o__Bacteroidales;f__Bacteroidaceae;g__Bacteroides;s__Bacteroides_ndongoniae	Bacteroides_ndongoniae	0	1589	0	491	0	0	0	529	0	0	3122	0	2549	3731	5329	0	804	2597	648	14536	0	3393	3368	3968	0	0	0	0	0	0	1014	0	0	257	184	346	4954	17749	2638	7376	32	1894	0	0	0	9527	16489
	d__Bacteria;p__Firmicutes_A;c__Clostridia;o__Lachnospirales;f__Lachnospiraceae;g__Anaerostipes;s__Anaerostipes_sp900066705	Anaerostipes_sp900066705	0	0	0	0	0	0	0	0	0	0	0	0	1420	2201	14879	53	0	968	0	0	0	0	7382	0	0	0	0	0	0	0	0	0	0	0	0	10257	0	7018	4950	0	0	599	0	2370	3241	5845	3110
	d__Bacteria;p__Bacteroidota;c__Bacteroidia;o__Bacteroidales;f__Bacteroidaceae;g__Prevotella;s__Prevotella_sp002451555	Prevotella_sp002451555	0	6359	0	0	0	0	0	0	0	0	50061	326	21476	27558	920	0	5913	16455	11956	34373	10163	9190	29431	0	0	0	0	0	0	1493	0	0	0	0	0	0	1936	35124	59749	9758	9139	0	61131	0	0	1616	329
	d__Bacteria;p__Firmicutes_C;c__Negativicutes;o__Veillonellales;f__Dialisteraceae;g__Dialister;s__Dialister_invisus	Dialister_invisus	0	0	0	0	0	0	0	0	0	271	0	0	0	0	0	1599	0	0	0	0	0	0	0	0	0	0	0	0	0	0	0	0	0	0	0	0	0	0	26235	167409	0	17116	0	296	2576	2217	13323
	d__Bacteria;p__Firmicutes_A;c__Clostridia;o__Oscillospirales;f__Oscillospiraceae;g__ER4;s__ER4_sp900317525	ER4_sp900317525	0	0	0	0	0	0	0	0	0	0	7243	0	0	228685	0	0	0	0	39793	0	3733	41397	15099	0	0	0	0	0	0	0	0	0	0	0	0	0	0	17612	0	0	0	69894	0	0	0	0	0
	d__Bacteria;p__Firmicutes_A;c__Clostridia;o__Oscillospirales;f__Oscillospiraceae;g__CAG-83;s__CAG-83_sp003487665	CAG-83_sp003487665	0	0	0	0	0	0	0	0	0	0	141542	0	0	10929	0	0	0	0	331324	0	0	80132	0	0	0	0	0	0	0	0	0	0	0	0	0	0	0	9347	0	0	0	0	0	0	0	0	0
	d__Bacteria;p__Firmicutes_A;c__Clostridia;o__Lachnospirales;f__Lachnospiraceae;g__Lachnospira;s__Lachnospira_sp000436475	Lachnospira_sp000436475	0	0	0	0	0	0	0	0	0	0	0	0	384	855	0	0	0	0	0	20364	0	0	1146	0	0	0	0	0	0	0	0	0	0	0	0	236333	0	0	0	0	0	15244	0	0	0	0	0
	d__Bacteria;p__Bacteroidota;c__Bacteroidia;o__Bacteroidales;f__Bacteroidaceae;g__Bacteroides;s__Bacteroides_sp900553815	Bacteroides_sp900553815	0	1819	0	463	0	0	0	1836	0	0	2192	0	3053	2366	4415	0	1258	2739	615	10000	0	3269	3634	5533	0	0	0	0	0	0	3134	0	0	422	94	1549	5097	15334	2559	5360	0	2271	0	0	0	8163	10612
	d__Bacteria;p__Firmicutes_A;c__Clostridia;o__Oscillospirales;f__Ruminococcaceae;g__Faecalibacterium;s__Faecalibacterium_prausnitzii_H	Faecalibacterium_prausnitzii_H	0	23271	0	458	0	0	0	0	0	0	10337	0	11979	6518	206	48339	0	6868	6153	4570	6925	15845	33169	4595	0	0	0	0	0	0	0	0	0	1059	0	6120	3565	16401	7861	0	1940	10826	1573	10490	84918	26851	2772
	d__Bacteria;p__Firmicutes_A;c__Clostridia;o__Lachnospirales;f__Lachnospiraceae;g__KLE1615;s__KLE1615_sp900066985	KLE1615_sp900066985	0	0	0	0	0	0	0	0	0	0	1270	0	16422	7896	4386	0	0	0	309	3014	0	9675	774	0	0	0	0	0	0	0	0	0	0	0	0	0	0	1737	1628	0	0	33704	0	0	170633	0	0
	d__Bacteria;p__Firmicutes_A;c__Clostridia;o__Lachnospirales;f__Lachnospiraceae;g__Blautia_A;s__Blautia_A_sp905209435	Blautia_A_sp905209435	0	2745	0	2609	0	0	0	0	0	4767	3313	0	2988	2532	921	5409	3598	5728	662	0	116	19479	1629	1055	0	0	0	0	0	0	0	0	0	0	0	1449	6703	1693	9468	0	0	0	4881	2545	2704	5724	3049
	d__Bacteria;p__Firmicutes;c__Bacilli;o__Lactobacillales;f__Lactobacillaceae;g__Limosilactobacillus;s__Limosilactobacillus_portuensis	Limosilactobacillus_portuensis	0	0	0	0	0	5202	0	0	0	0	0	183012	0	0	0	0	0	0	0	0	0	0	0	0	0	0	0	0	0	0	0	342294	0	0	1145	0	0	0	0	0	0	0	0	0	21898	0	0
	d__Bacteria;p__Proteobacteria;c__Gammaproteobacteria;o__Enterobacterales;f__Enterobacteriaceae;g__Klebsiella;s__Klebsiella_indica	Klebsiella_indica	3309	0	0	0	0	896	0	0	1031	0	0	0	0	0	0	651	0	0	0	0	0	0	0	0	579	0	0	0	3739	0	0	0	0	906	0	0	0	0	0	0	0	0	0	0	0	0	0
	d__Bacteria;p__Firmicutes_A;c__Clostridia;o__Lachnospirales;f__Lachnospiraceae;g__Clostridium_Q;s__Clostridium_Q_symbiosum	Clostridium_Q_symbiosum	0	0	0	0	0	0	0	0	0	0	0	0	3994	0	135	0	0	0	0	0	0	0	0	0	0	0	0	0	0	0	0	0	0	0	0	0	0	0	0	0	0	40019	0	0	0	10955	1688
	d__Bacteria;p__Firmicutes_A;c__Clostridia;o__Oscillospirales;f__Oscillospiraceae;g__CAG-83;s__CAG-83_sp000435975	CAG-83_sp000435975	0	0	0	0	0	0	0	0	0	0	0	0	0	3646	0	0	0	0	0	0	0	655	0	0	0	0	0	0	0	0	0	0	0	0	0	0	0	0	0	0	0	494291	0	0	0	0	0
	d__Bacteria;p__Bacteroidota;c__Bacteroidia;o__Bacteroidales;f__Rikenellaceae;g__Alistipes;s__Alistipes_shahii	Alistipes_shahii	0	0	0	1451	0	0	0	0	0	0	2750	0	17568	52668	0	0	0	0	2671	191	0	240365	0	0	0	0	0	0	0	0	0	0	0	0	0	0	0	29931	1107	0	0	0	0	0	0	9615	25604
	d__Bacteria;p__Proteobacteria;c__Gammaproteobacteria;o__Enterobacterales;f__Enterobacteriaceae;g__Enterobacter;s__Enterobacter_ludwigii	Enterobacter_ludwigii	0	0	0	0	0	0	0	0	0	0	0	0	0	0	0	0	0	0	0	0	0	0	0	0	690	0	0	0	20492	0	0	0	0	0	0	0	0	0	0	0	0	0	0	0	0	69	0
	d__Bacteria;p__Proteobacteria;c__Gammaproteobacteria;o__Enterobacterales;f__Enterobacteriaceae;g__Enterobacter;s__Enterobacter_soli	Enterobacter_soli	0	0	0	0	0	0	0	0	0	0	0	0	0	0	0	0	0	0	0	0	0	0	0	0	0	0	0	0	1130	0	0	0	0	0	0	0	0	0	0	0	0	0	0	0	0	0	0
	d__Bacteria;p__Firmicutes_A;c__Clostridia;o__Lachnospirales;f__Lachnospiraceae;g__Lachnospira;s__Lachnospira_sp000436535	Lachnospira_sp000436535	0	0	0	0	0	0	0	0	0	0	0	0	127	611	0	0	0	0	0	2120	0	0	1968	0	0	0	0	0	0	0	0	0	0	0	0	30322	0	0	0	0	0	1362	0	0	0	0	0
	d__Bacteria;p__Firmicutes;c__Bacilli;o__Erysipelotrichales;f__Erysipelotrichaceae;g__Clostridium_AQ;s__Clostridium_AQ_sp003481775	Clostridium_AQ_sp003481775	0	0	0	28254	0	0	0	0	0	0	0	0	0	0	0	0	1432	0	0	0	0	0	0	57	0	0	0	0	0	1284	0	0	0	0	0	0	4758	0	0	0	0	0	0	0	0	1057	0
	d__Bacteria;p__Verrucomicrobiota;c__Verrucomicrobiae;o__Verrucomicrobiales;f__Akkermansiaceae;g__Akkermansia;s__Akkermansia_muciniphila_E	Akkermansia_muciniphila_E	0	0	0	0	0	0	0	0	0	0	0	0	505	0	0	0	86072	0	0	0	0	0	2443	0	0	0	0	0	0	23864	0	0	22813	0	0	0	0	0	0	159	0	0	0	0	0	158	0
	d__Bacteria;p__Firmicutes_A;c__Clostridia;o__Lachnospirales;f__Lachnospiraceae;g__Roseburia;s__Roseburia_sp003470905	Roseburia_sp003470905	0	0	0	0	0	0	0	0	0	0	0	0	0	1585	0	0	0	0	0	0	0	6528	116223	0	0	0	0	0	0	0	0	0	0	0	0	0	0	5457	1105	0	0	0	0	0	0	0	0
	d__Bacteria;p__Firmicutes_A;c__Clostridia;o__Oscillospirales;f__Acutalibacteraceae;g__Eubacterium_R;s__Eubacterium_R_sp900542875	Eubacterium_R_sp900542875	0	0	0	0	0	0	0	0	0	0	0	0	0	236	0	0	0	0	10993	0	0	0	0	0	0	0	0	0	0	0	0	0	0	0	0	0	0	24012	481610	0	0	0	0	0	0	0	0
	d__Bacteria;p__Proteobacteria;c__Gammaproteobacteria;o__Enterobacterales;f__Enterobacteriaceae;g__Lelliottia;s__Lelliottia_amnigena_A	Lelliottia_amnigena_A	4723	3119	1679	0	2712	1109	3186	227	6693	610	0	805	1501	0	0	3806	544	337	0	0	0	0	0	490	5987	0	3315	2336	26196	345	5056	2581	6351	8046	0	575	190	0	0	1821	0	0	0	3639	376	677	0
	d__Bacteria;p__Firmicutes_C;c__Negativicutes;o__Veillonellales;f__Megasphaeraceae;g__Megasphaera;s__Megasphaera_sp900540735	Megasphaera_sp900540735	0	44293	0	2257	0	342	0	0	7036	30568	0	92	25077	0	1453	11769	7739	4363	0	899	4217	0	23	18149	0	0	0	26532	0	53405	7540	1766	4568	0	0	6862	4473	0	0	16299	69707	0	19638	98194	34655	2870	162
	d__Bacteria;p__Bacteroidota;c__Bacteroidia;o__Bacteroidales;f__Rikenellaceae;g__Alistipes;s__Alistipes_merdavium	Alistipes_merdavium	0	0	0	0	0	0	0	0	0	0	124	0	2212	2222	8538	0	0	277	957	44012	0	20316	1225	0	0	0	0	0	0	0	0	0	0	0	0	0	0	11705	0	0	0	0	0	0	0	34041	114549
	d__Bacteria;p__Firmicutes_A;c__Clostridia;o__Lachnospirales;f__Lachnospiraceae;g__Anaerobutyricum;s__Anaerobutyricum_soehngenii	Anaerobutyricum_soehngenii	0	0	0	0	0	0	0	0	0	0	7103	0	4678	210	0	0	0	6020	704	0	0	4843	0	0	0	0	0	0	0	0	0	0	0	0	0	0	0	15904	741	0	0	8675	12906	0	0	24958	68713
	d__Bacteria;p__Firmicutes_C;c__Negativicutes;o__Veillonellales;f__Dialisteraceae;g__Dialister;s__Dialister_sp900541605	Dialister_sp900541605	0	0	0	25702	0	0	0	0	0	0	0	0	68	0	0	23000	0	0	0	0	0	0	0	0	0	0	0	0	0	186055	0	0	22869	0	0	0	0	0	222546	956	407	13845	0	0	8644	0	0
	d__Bacteria;p__Bacteroidota;c__Bacteroidia;o__Bacteroidales;f__Bacteroidaceae;g__Alloprevotella;s__Alloprevotella_sp900539625	Alloprevotella_sp900539625	0	0	0	0	0	0	0	0	0	0	0	0	0	216452	0	0	0	0	0	0	0	0	0	0	0	0	0	0	0	0	0	0	0	0	0	0	0	0	0	0	0	0	64492	0	0	0	0
	d__Bacteria;p__Firmicutes_A;c__Clostridia;o__Clostridiales;f__Clostridiaceae;g__Clostridium;s__Clostridium_paraputrificum	Clostridium_paraputrificum	0	0	0	0	0	89512	0	0	123	367	0	0	0	0	0	0	0	0	0	0	0	0	0	0	3529	0	0	0	0	708	0	0	10487	0	0	0	0	0	0	0	0	0	0	0	0	0	0
	d__Bacteria;p__Firmicutes;c__Bacilli;o__Erysipelotrichales;f__Erysipelotrichaceae;g__Clostridium_AQ;s__Clostridium_AQ_sp000165065	Clostridium_AQ_sp000165065	0	0	0	4849	0	0	0	0	0	0	0	0	0	0	0	0	313	0	0	0	0	1698	0	14111	0	0	0	0	0	1209	0	0	0	0	0	0	4632	0	0	0	0	0	0	0	0	4453	0
	d__Bacteria;p__Firmicutes_A;c__Clostridia;o__Oscillospirales;f__Acutalibacteraceae;g__CAG-177;s__CAG-177_sp003514385	CAG-177_sp003514385	0	0	0	0	0	0	0	0	0	0	0	0	0	0	146645	0	0	0	0	0	315177	2114	0	0	0	0	0	0	0	0	0	0	0	0	0	0	0	26682	0	0	0	0	0	0	0	0	0
	d__Bacteria;p__Firmicutes;c__Bacilli;o__Lactobacillales;f__Lactobacillaceae;g__Lactobacillus;s__Lactobacillus_johnsonii	Lactobacillus_johnsonii	0	0	25108	0	0	14094	50170	0	0	0	0	57043	0	0	0	0	0	0	0	0	0	0	0	0	0	27808	1187	545	0	0	0	262774	0	0	3504	0	0	0	0	0	0	0	0	0	31740	0	0
	d__Bacteria;p__Proteobacteria;c__Gammaproteobacteria;o__Enterobacterales;f__Enterobacteriaceae;g__Klebsiella;s__Klebsiella_sp003752615	Klebsiella_sp003752615	27730	0	0	0	0	8974	0	0	3046	0	0	0	0	0	0	2668	0	0	0	0	0	0	0	0	774	0	0	0	23854	0	0	0	0	2339	0	0	0	0	0	0	0	0	0	0	0	0	0
	d__Bacteria;p__Firmicutes_A;c__Clostridia;o__Lachnospirales;f__Lachnospiraceae;g__Copromonas;s__Copromonas_sp900066785	Copromonas_sp900066785	0	5124	0	0	0	0	0	0	0	0	9351	0	2649	2655	0	20564	2840	0	1071	1057	389	1530	1734	3446	0	0	0	0	0	0	0	0	0	0	0	87651	6130	315	1602	0	0	6559	178	4208	0	2602	0
	d__Bacteria;p__Bacteroidota;c__Bacteroidia;o__Bacteroidales;f__Bacteroidaceae;g__Prevotella;s__Prevotella_sp900553155	Prevotella_sp900553155	0	2826	0	0	0	0	0	0	0	0	8800	77	5710	14404	0	0	0	43827	0	0	81289	6770	0	0	0	0	0	0	0	0	0	0	0	0	0	0	1924	0	0	0	0	0	184322	0	0	0	0
	d__Bacteria;p__Firmicutes_A;c__Clostridia;o__Lachnospirales;f__Lachnospiraceae;g__Mediterraneibacter;s__Mediterraneibacter_torques	Mediterraneibacter_torques	0	746	0	0	0	0	0	0	0	0	0	0	24800	0	4955	0	0	0	35931	0	0	0	33	0	0	0	0	0	0	0	0	0	0	0	0	0	0	20358	0	7452	0	8238	0	0	0	87143	9086
	d__Bacteria;p__Firmicutes_A;c__Clostridia;o__Oscillospirales;f__Acutalibacteraceae;g__UBA1417;s__UBA1417_sp003531055	UBA1417_sp003531055	0	0	0	0	0	0	0	0	0	0	2999	0	0	49239	20951	0	0	0	31787	1570	412	87851	535	0	0	0	0	0	0	0	0	0	0	0	0	0	0	12398	6845	0	0	89449	0	0	0	37791	15286
	d__Bacteria;p__Firmicutes;c__Bacilli;o__Lactobacillales;f__Streptococcaceae;g__Streptococcus;s__Streptococcus_salivarius	Streptococcus_salivarius	4991	17723	23992	0	474	10408	15678	0	25171	420	0	5394	2251	7386	1394	13971	0	463	0	0	99	10074	1790	1759	699	501	11257	195	1637	2533	0	43871	556	1346	1005	515	175	0	1058	0	3409	0	391	21363	3311	0	0
	d__Bacteria;p__Firmicutes_A;c__Clostridia;o__Peptostreptococcales;f__Peptostreptococcaceae;g__Intestinibacter;s__Intestinibacter_bartlettii	Intestinibacter_bartlettii	0	0	0	0	0	0	0	0	0	10484	0	0	869	0	0	10373	2408	0	0	0	0	4264	0	0	0	0	0	0	0	3563	0	0	1127	0	0	0	0	1620	0	0	0	0	459	0	0	22544	2519
	d__Bacteria;p__Bacteroidota;c__Bacteroidia;o__Bacteroidales;f__Bacteroidaceae;g__Bacteroides;s__Bacteroides_helcogenes	Bacteroides_helcogenes	0	1328	0	175	0	0	0	1266	0	0	1662	0	1253	3072	4246	0	806	1811	758	7887	0	1902	2246	2874	0	0	0	0	0	0	2175	0	0	234	258	1117	1778	9091	1034	2905	96	1354	0	0	0	8237	14976
	d__Bacteria;p__Firmicutes_A;c__Clostridia;o__Lachnospirales;f__Lachnospiraceae;g__Enterocloster;s__Enterocloster_sp000155435	Enterocloster_sp000155435	0	0	0	0	0	0	0	0	0	0	0	0	0	0	0	0	6287	0	0	0	0	0	0	0	0	0	0	0	0	0	0	0	0	0	0	0	0	2833	298	0	0	2247	0	0	618	817	759
	d__Bacteria;p__Firmicutes;c__Bacilli;o__Lactobacillales;f__Enterococcaceae;g__Enterococcus_A;s__Enterococcus_A_avium	Enterococcus_A_avium	0	0	0	5859	50789	0	0	0	1168	30062	0	0	0	0	0	23516	0	0	0	0	0	0	0	68972	0	0	1078	0	7878	2437	38899	0	0	0	0	0	125	0	0	0	0	0	0	0	9361	0	0
	d__Bacteria;p__Firmicutes;c__Bacilli;o__Lactobacillales;f__Lactobacillaceae;g__Limosilactobacillus;s__Limosilactobacillus_mucosae	Limosilactobacillus_mucosae	0	0	0	12799	0	0	0	0	128233	283921	0	0	0	0	0	0	0	0	0	0	0	0	0	311	0	0	0	0	0	4631	0	0	4897	0	0	0	0	0	238	0	0	0	84	6704	16246	0	0
	d__Bacteria;p__Bacteroidota;c__Bacteroidia;o__Bacteroidales;f__Bacteroidaceae;g__OM05-12;s__OM05-12_sp003438995	OM05-12_sp003438995	0	2033	0	34	0	0	0	766	0	0	3723	0	3622	886	4764	0	661	1572	529	6381	0	4470	3235	9457	0	0	0	0	0	0	100	0	0	2853	0	170	3198	9858	2435	11028	0	2593	0	0	0	6416	5168
	d__Bacteria;p__Bacteroidota;c__Bacteroidia;o__Bacteroidales;f__Bacteroidaceae;g__Phocaeicola;s__Phocaeicola_sp900553185	Phocaeicola_sp900553185	0	1440	0	0	0	0	0	553	0	0	2088	0	1908	234	3634	0	334	1403	305	4733	0	1977	2190	5115	0	0	0	0	0	0	454	0	0	6167	0	216	1211	11537	1175	8141	0	4044	0	0	0	4740	6403
	d__Bacteria;p__Actinobacteriota;c__Coriobacteriia;o__Coriobacteriales;f__Atopobiaceae;g__Parolsenella;s__Parolsenella_uli_A	Parolsenella_uli_A	0	43153	0	0	0	383	0	0	138914	30469	0	666	15664	0	18561	52724	8272	14109	0	0	9314	0	2299	35748	0	0	0	14071	39349	0	0	0	0	0	0	4519	0	19	0	2883	14710	0	1243	0	0	0	0
	d__Bacteria;p__Firmicutes_A;c__Clostridia;o__Lachnospirales;f__Lachnospiraceae;g__Enterocloster;s__Enterocloster_aldenensis	Enterocloster_aldenensis	0	0	0	0	0	0	0	0	0	0	0	0	0	0	3042	0	79768	1862	0	0	0	0	0	734	0	0	0	0	0	0	0	0	0	0	0	0	0	0	0	0	0	11906	0	0	46157	7434	30375
	d__Bacteria;p__Actinobacteriota;c__Coriobacteriia;o__Coriobacteriales;f__Atopobiaceae;g__Parolsenella;s__unknown	unknown	0	45286	0	0	0	121	0	0	135645	32223	0	467	16009	380	20887	52066	8455	12775	0	0	10289	0	2877	33276	0	0	0	11981	38459	0	0	0	0	0	0	4336	120	2090	0	2979	13540	0	788	0	0	0	0
	d__Bacteria;p__Firmicutes_A;c__Clostridia;o__Lachnospirales;f__Lachnospiraceae;g__Enterocloster;s__Enterocloster_sp005845215	Enterocloster_sp005845215	0	0	0	0	0	0	0	0	0	0	0	0	0	0	0	0	0	0	0	0	0	0	0	0	0	0	0	0	0	0	0	0	0	0	0	0	0	0	0	0	0	489	0	0	0	2702	0
	d__Bacteria;p__Firmicutes_A;c__Clostridia;o__Oscillospirales;f__Ruminococcaceae;g__Faecalibacterium;s__Faecalibacterium_prausnitzii_E	Faecalibacterium_prausnitzii_E	0	18038	0	372	0	0	0	0	0	0	8538	0	8789	8173	252	35139	0	4353	4035	4112	4675	15217	25195	2361	0	0	0	0	0	0	0	0	0	936	0	3060	2365	17661	5190	0	858	10541	1252	9463	78374	22317	2155
	d__Bacteria;p__Proteobacteria;c__Gammaproteobacteria;o__Burkholderiales;f__Burkholderiaceae;g__Sutterella;s__Sutterella_sp900762445	Sutterella_sp900762445	0	0	0	0	0	0	0	0	0	0	0	0	0	0	0	0	0	0	0	0	0	0	0	0	0	0	0	0	0	0	0	0	0	0	0	0	0	0	0	0	0	0	0	0	0	0	0
	d__Bacteria;p__Firmicutes_A;c__Clostridia;o__Oscillospirales;f__Oscillospiraceae;g__CAG-83;s__CAG-83_sp000431575	CAG-83_sp000431575	0	0	0	0	0	0	0	0	0	0	1540	0	0	24799	0	0	0	0	44748	0	29078	4510	16968	0	0	0	0	0	0	0	0	0	0	0	0	0	0	79701	89297	0	0	101040	0	0	0	13184	0
	d__Bacteria;p__Actinobacteriota;c__Actinomycetia;o__Propionibacteriales;f__Propionibacteriaceae;g__Cutibacterium;s__Cutibacterium_avidum	Cutibacterium_avidum	0	0	0	0	0	0	0	0	0	0	0	0	0	0	0	0	0	0	0	0	0	0	0	0	0	0	0	0	0	0	0	0	0	0	0	0	0	0	0	0	0	0	0	0	0	0	0
	d__Bacteria;p__Firmicutes_A;c__Clostridia;o__Lachnospirales;f__Lachnospiraceae;g__Faecalimonas;s__Faecalimonas_umbilicata	Faecalimonas_umbilicata	0	0	0	0	0	0	0	0	0	0	0	0	0	0	0	0	0	0	0	0	0	0	0	0	0	0	0	0	0	0	0	0	0	0	0	0	0	0	0	0	0	0	0	311	17104	0	0
	d__Bacteria;p__Firmicutes;c__Bacilli;o__Lactobacillales;f__Lactobacillaceae;g__Limosilactobacillus;s__Limosilactobacillus_vaginalis	Limosilactobacillus_vaginalis	0	0	0	0	0	60343	0	0	0	0	0	42072	0	0	0	0	0	0	0	0	0	0	0	0	0	0	0	0	0	0	0	68435	0	0	698	0	0	0	0	0	0	0	0	990	258749	0	0
	d__Bacteria;p__Firmicutes_A;c__Clostridia;o__Lachnospirales;f__Lachnospiraceae;g__Acetatifactor;s__Acetatifactor_sp900766575	Acetatifactor_sp900766575	0	0	0	0	0	0	0	0	0	0	8871	0	8659	5076	1224	0	0	449	11101	8111	24	17936	13574	0	0	0	0	0	0	0	0	0	0	0	0	0	0	1314	0	0	0	20811	0	0	0	12038	62329
	d__Bacteria;p__Bacteroidota;c__Bacteroidia;o__Bacteroidales;f__Bacteroidaceae;g__Prevotella;s__Prevotella_hominis	Prevotella_hominis	0	861	0	0	0	0	0	0	0	0	15105	0	10613	14402	1045	0	2814	7082	9616	0	4709	877	4196	0	0	0	0	0	0	186	0	0	0	0	0	0	897	40039	33873	2861	3783	0	16464	0	0	679	0
	d__Bacteria;p__Firmicutes_A;c__Clostridia;o__Lachnospirales;f__Lachnospiraceae;g__Blautia_A;s__Blautia_A_faecis	Blautia_A_faecis	0	0	0	0	0	0	0	0	0	0	5280	0	0	6836	0	0	0	199	0	2945	0	696	2204	0	0	0	0	0	0	0	0	0	0	0	0	0	0	596	5559	0	0	2206	0	0	0	117	0
	d__Bacteria;p__Firmicutes;c__Bacilli;o__Lactobacillales;f__Lactobacillaceae;g__Lactobacillus;s__Lactobacillus_taiwanensis	Lactobacillus_taiwanensis	0	0	20166	0	0	11194	41219	0	0	0	0	48600	0	0	0	0	0	0	0	0	0	0	0	0	0	23099	851	391	0	0	0	231763	0	0	2110	0	0	0	0	0	0	0	0	0	28402	0	0
	d__Bacteria;p__Firmicutes_A;c__Clostridia;o__Oscillospirales;f__Oscillospiraceae;g__Dysosmobacter;s__Dysosmobacter_welbionis	Dysosmobacter_welbionis	0	0	0	0	0	0	0	0	0	0	0	0	0	0	0	0	0	0	0	1575	0	0	0	6882	0	0	0	0	0	0	0	0	0	0	0	0	0	0	0	0	0	14183	0	0	0	103003	110164
	d__Bacteria;p__Bacteroidota;c__Bacteroidia;o__Bacteroidales;f__Bacteroidaceae;g__Bacteroides;s__Bacteroides_sp910578895	Bacteroides_sp910578895	0	110	0	0	0	0	0	0	0	0	1440	0	93	885	997	0	0	264	183	14240	0	685	3004	551	0	0	0	0	0	0	0	0	0	54	0	0	0	29434	2425	332	0	0	0	0	0	1859	2696
	d__Bacteria;p__Firmicutes_A;c__Clostridia;o__Lachnospirales;f__Lachnospiraceae;g__Dorea_A;s__Dorea_A_longicatena	Dorea_A_longicatena	0	502	0	0	0	0	0	0	4325	0	2395	0	32856	4094	656	27680	831	2923	1338	2257	34151	5103	10619	833	0	0	0	0	0	0	4808	0	157889	0	0	30	0	2442	29527	0	1020	1184	3196	0	0	16223	0
	d__Bacteria;p__Desulfobacterota_I;c__Desulfovibrionia;o__Desulfovibrionales;f__Desulfovibrionaceae;g__Bilophila;s__Bilophila_wadsworthia	Bilophila_wadsworthia	0	0	0	0	0	0	0	0	0	0	15642	0	0	8868	7032	0	0	6338	2815	18606	4031	17783	7137	0	0	0	0	0	0	0	24790	0	0	0	0	0	23943	0	5246	0	0	0	0	0	0	0	0
	d__Bacteria;p__Firmicutes_C;c__Negativicutes;o__Veillonellales;f__Veillonellaceae;g__Veillonella_A;s__Veillonella_A_sp000431435	Veillonella_A_sp000431435	0	0	0	0	0	0	72	0	0	22208	0	0	0	0	0	0	0	0	0	0	0	0	0	0	0	0	0	0	0	0	10047	4595	0	0	0	0	0	0	0	0	0	0	0	0	0	0	0
	d__Bacteria;p__Firmicutes_A;c__Clostridia;o__Lachnospirales;f__Lachnospiraceae;g__Roseburia;s__Roseburia_sp900542495	Roseburia_sp900542495	0	0	0	0	0	0	0	0	0	0	8102	0	0	10191	0	0	0	0	27654	11386	1385	5555	57646	0	0	0	0	0	0	0	0	0	0	0	0	0	0	5574	2729	0	0	17278	0	0	0	0	0
	d__Bacteria;p__Firmicutes_A;c__Clostridia;o__Oscillospirales;f__Ruminococcaceae;g__Faecalibacterium;s__Faecalibacterium_prausnitzii_J	Faecalibacterium_prausnitzii_J	0	0	0	0	0	0	0	0	0	0	63160	0	0	20930	0	0	0	0	0	567	340	152362	12533	0	0	0	0	0	0	0	0	0	0	0	0	0	0	6703	919	0	0	283	0	0	0	0	0
	d__Bacteria;p__Bacteroidota;c__Bacteroidia;o__Bacteroidales;f__Bacteroidaceae;g__Bacteroides;s__Bacteroides_sp002491635	Bacteroides_sp002491635	0	31	0	0	0	0	0	0	0	0	681	0	62	3411	3740	0	0	1389	491	6596	0	245	1054	127	0	0	0	0	0	0	0	0	0	0	88	0	0	7169	0	255	0	0	0	0	0	6024	13768
	d__Bacteria;p__Firmicutes_C;c__Negativicutes;o__Veillonellales;f__Megasphaeraceae;g__Megasphaera;s__unknown	unknown	0	57512	0	1676	0	0	0	0	19657	126	0	836	34413	0	1274	104	4643	6546	0	434	9957	0	0	15605	0	0	0	35350	0	381	7527	1515	8771	0	0	9687	62	0	0	231	106	0	21116	116544	47711	2332	0
	d__Bacteria;p__Bacteroidota;c__Bacteroidia;o__Bacteroidales;f__Bacteroidaceae;g__Bacteroides;s__Bacteroides_acidifaciens	Bacteroides_acidifaciens	0	5120	0	0	0	0	0	0	0	0	8750	0	12223	682	6058	0	0	1106	0	3772	0	8980	10023	7726	0	0	0	0	0	0	0	0	0	569	0	0	0	5648	4912	15820	0	0	0	0	0	493	605
	d__Bacteria;p__Actinobacteriota;c__Coriobacteriia;o__Coriobacteriales;f__Atopobiaceae;g__Parolsenella;s__Parolsenella_sp900543875	Parolsenella_sp900543875	0	37983	0	0	0	1708	0	0	130107	24445	0	295	15280	0	18629	44579	5658	9950	0	0	8355	0	5029	30027	0	0	0	11887	33736	0	0	0	0	0	0	3342	411	0	0	2116	12083	0	3659	0	0	0	0
	d__Bacteria;p__Bacteroidota;c__Bacteroidia;o__Bacteroidales;f__Bacteroidaceae;g__Phocaeicola;s__Phocaeicola_ilei	Phocaeicola_ilei	0	784	0	0	0	0	0	0	0	0	1684	0	2115	512	3413	0	31	1015	96	4343	0	2420	1886	4050	0	0	0	0	0	0	0	0	0	5231	0	0	281	11149	1409	7491	0	2705	0	0	0	4496	6416
	d__Bacteria;p__Proteobacteria;c__Gammaproteobacteria;o__Enterobacterales;f__Enterobacteriaceae;g__Enterobacter;s__Enterobacter_mori	Enterobacter_mori	0	0	0	0	0	0	0	0	0	0	0	0	0	0	0	0	0	0	0	0	0	0	0	0	135	0	0	0	25936	0	0	0	0	0	0	0	0	0	0	0	0	0	0	0	0	0	0
	d__Bacteria;p__Proteobacteria;c__Gammaproteobacteria;o__Burkholderiales;f__Burkholderiaceae;g__Sutterella;s__unknown	unknown	0	3584	0	0	0	157840	0	0	0	0	0	0	657	0	0	0	0	1190	0	112	0	0	201	0	0	0	0	0	0	0	0	0	0	0	0	6244	1437	0	0	18218	0	0	0	0	0	0	0
	d__Bacteria;p__Firmicutes_C;c__Negativicutes;o__Acidaminococcales;f__Acidaminococcaceae;g__Phascolarctobacterium_A;s__Phascolarctobacterium_A_succinatutens	Phascolarctobacterium_A_succinatutens	0	0	0	0	0	0	0	0	0	0	159759	0	0	104644	0	0	0	0	67598	0	2859	0	3710	9941	0	0	0	0	0	0	0	0	0	1818	0	0	3831	0	0	0	71	0	0	0	0	0	0
	d__Bacteria;p__Firmicutes_A;c__Clostridia;o__Oscillospirales;f__Acutalibacteraceae;g__Eubacterium_R;s__Eubacterium_R_sp000434995	Eubacterium_R_sp000434995	0	0	0	0	0	0	0	0	0	0	0	0	0	0	0	0	0	0	0	0	1920	2231	0	0	0	0	0	0	0	0	0	0	0	0	0	0	0	0	0	0	0	0	0	0	0	0	0
	d__Bacteria;p__Firmicutes_A;c__Clostridia;o__Lachnospirales;f__Lachnospiraceae;g__Acetatifactor;s__Acetatifactor_sp900772845	Acetatifactor_sp900772845	0	0	0	0	0	0	0	0	0	0	7301	0	7248	4661	1049	0	0	245	6681	7029	0	18032	10500	0	0	0	0	0	0	0	0	0	0	0	0	0	0	588	0	0	0	15195	0	0	0	5455	59211
	d__Bacteria;p__Firmicutes_A;c__Clostridia;o__Lachnospirales;f__Lachnospiraceae;g__Roseburia;s__Roseburia_sp003483745	Roseburia_sp003483745	0	0	0	0	0	0	0	0	0	0	0	0	0	2153	0	0	0	0	0	0	0	42377	76558	0	0	0	0	0	0	0	0	0	0	0	0	0	0	3893	156	0	0	0	0	0	0	0	0
	d__Bacteria;p__Bacteroidota;c__Bacteroidia;o__Bacteroidales;f__Tannerellaceae;g__Parabacteroides;s__Parabacteroides_gordonii	Parabacteroides_gordonii	0	1594	0	0	0	0	0	0	0	0	964	0	1225	0	344	0	0	0	0	733	0	40712	116	0	0	0	0	0	0	0	0	0	0	2267	0	0	0	1413	1456	0	0	26440	0	0	0	342	559
	d__Bacteria;p__Proteobacteria;c__Gammaproteobacteria;o__Enterobacterales;f__Enterobacteriaceae;g__Proteus;s__Proteus_mirabilis	Proteus_mirabilis	0	0	0	0	0	0	0	0	36150	60276	0	0	0	0	0	52307	0	0	0	0	0	0	0	0	0	0	0	0	0	0	2187	0	15084	0	0	0	0	0	0	918	0	0	0	0	20114	0	0
	d__Bacteria;p__Firmicutes_A;c__Clostridia;o__Oscillospirales;f__Ruminococcaceae;g__Faecalibacterium;s__Faecalibacterium_prausnitzii	Faecalibacterium_prausnitzii	0	0	0	0	0	0	0	0	0	0	38090	0	0	20632	0	0	0	0	0	2116	0	38090	20632	0	0	0	0	0	0	0	0	0	0	0	0	0	0	50787	0	0	0	0	0	0	0	0	0
	d__Bacteria;p__Proteobacteria;c__Gammaproteobacteria;o__Enterobacterales;f__Enterobacteriaceae;g__Citrobacter;s__Citrobacter_sp005281345	Citrobacter_sp005281345	46	1829	788	0	504	0	1196	0	5775	413	0	45	501	0	0	1794	410	0	0	0	0	0	0	272	1389	0	1617	8803	10523	182	1736	2438	2518	4640	0	227	0	0	0	827	0	0	0	2597	0	0	0
	d__Bacteria;p__Firmicutes;c__Bacilli;o__Erysipelotrichales;f__Coprobacillaceae;g__Catenibacterium;s__Catenibacterium_sp000437715	Catenibacterium_sp000437715	0	15021	0	0	0	0	0	0	0	0	70838	0	23440	121110	0	0	0	41879	0	3318	441	0	1565	0	0	0	0	0	0	0	0	0	0	0	0	0	0	33293	0	0	99	0	39119	0	0	0	0
	d__Bacteria;p__Actinobacteriota;c__Actinomycetia;o__Actinomycetales;f__Bifidobacteriaceae;g__Bifidobacterium;s__Bifidobacterium_globosum	Bifidobacterium_globosum	785	2381	0	1390	2249	1754	2825	0	2100	4477	0	365	711	0	1965	2674	318	2011	0	0	1329	0	0	1078	0	634	4004	2329	2718	685	929	782	358	0	22	0	1703	22	223	115	4415	0	266	1166	852	359	331
	d__Bacteria;p__Cyanobacteria;c__Vampirovibrionia;o__Gastranaerophilales;f__Gastranaerophilaceae;g__Stercorousia;s__Stercorousia_sp001765415	Stercorousia_sp001765415	0	0	0	0	0	0	0	0	0	0	60047	0	0	47588	0	0	0	0	0	0	46416	0	0	0	0	0	0	0	0	0	0	0	0	0	0	0	0	32743	0	0	0	0	0	0	0	0	0
	d__Bacteria;p__Firmicutes;c__Bacilli;o__Lactobacillales;f__Lactobacillaceae;g__Ligilactobacillus;s__Ligilactobacillus_ruminis	Ligilactobacillus_ruminis	0	91914	0	36428	0	0	0	0	0	0	0	0	209838	0	0	0	3559	578	0	0	1649	0	0	17271	0	0	0	0	0	0	0	0	0	0	0	0	0	0	0	0	0	0	0	0	0	0	0
	d__Bacteria;p__Firmicutes_A;c__Clostridia;o__Oscillospirales;f__Oscillospiraceae;g__CAG-83;s__CAG-83_sp001916855	CAG-83_sp001916855	0	0	0	0	0	0	0	0	0	0	0	0	0	5591	0	0	2692	0	409	0	0	0	0	0	0	0	0	0	0	0	0	0	0	0	0	0	0	286	124	0	0	8369	0	0	0	0	0
	d__Bacteria;p__Proteobacteria;c__Gammaproteobacteria;o__Burkholderiales;f__Burkholderiaceae;g__Parasutterella;s__Parasutterella_gallistercoris	Parasutterella_gallistercoris	0	0	0	0	0	0	0	0	0	0	0	0	0	0	0	0	0	0	0	0	0	0	0	0	0	0	0	0	0	0	0	0	0	0	0	0	0	0	0	0	0	0	0	0	0	0	0
	d__Bacteria;p__Firmicutes_A;c__Clostridia;o__Lachnospirales;f__Lachnospiraceae;g__Eubacterium_G;s__Eubacterium_G_ventriosum	Eubacterium_G_ventriosum	0	0	0	0	0	0	0	0	0	0	325	0	0	56118	0	0	0	0	544	0	0	0	0	0	0	0	0	0	0	0	0	0	0	0	0	0	0	0	0	0	0	0	0	0	0	0	0
	d__Bacteria;p__Proteobacteria;c__Gammaproteobacteria;o__Enterobacterales;f__Enterobacteriaceae;g__Citrobacter_A;s__Citrobacter_A_sedlakii	Citrobacter_A_sedlakii	1825	3573	2299	82	3424	652	4325	1013	8904	1679	0	877	2151	0	0	3983	1366	552	0	54	0	0	0	18309	7437	0	5325	3771	5078	909	6450	6133	6934	14366	0	1024	589	0	0	4518	136	0	0	6931	500	376	0
	d__Bacteria;p__Actinobacteriota;c__Actinomycetia;o__Actinomycetales;f__Bifidobacteriaceae;g__Bifidobacterium;s__Bifidobacterium_ruminantium	Bifidobacterium_ruminantium	742	14588	80	1308	2932	2342	2938	59	3164	4764	140	637	7845	0	10855	3710	1620	14373	40	593	15331	1445	398	1443	100	721	4263	2302	2256	1896	628	760	575	0	258	1199	1925	5920	3042	287	40994	0	4763	877	826	1148	4004
	d__Bacteria;p__Bacteroidota;c__Bacteroidia;o__Bacteroidales;f__Tannerellaceae;g__Parabacteroides;s__Parabacteroides_acidifaciens	Parabacteroides_acidifaciens	0	7838	0	0	0	0	0	0	0	0	102	0	10410	4062	78	0	0	0	0	541	0	3317	153	0	0	0	0	0	0	0	0	0	0	3821	0	0	0	954	51	0	0	2604	0	0	0	0	0
	d__Bacteria;p__Firmicutes_C;c__Negativicutes;o__Acidaminococcales;f__Acidaminococcaceae;g__Acidaminococcus;s__Acidaminococcus_intestini	Acidaminococcus_intestini	0	0	0	0	0	0	0	0	0	0	0	0	0	0	0	0	84663	0	0	0	0	0	0	0	0	0	0	0	0	0	266739	0	0	0	0	0	0	0	0	0	0	0	0	0	0	0	0
	d__Bacteria;p__Firmicutes_A;c__Clostridia;o__Lachnospirales;f__Lachnospiraceae;g__Anaerobutyricum;s__Anaerobutyricum_hallii	Anaerobutyricum_hallii	0	0	0	0	0	0	0	0	0	0	39	0	0	0	0	0	0	0	659	0	0	27253	0	0	0	0	0	0	0	0	0	0	0	0	0	0	0	642	26624	0	0	688	0	0	0	1494	4459
	d__Bacteria;p__Firmicutes;c__Bacilli;o__Lactobacillales;f__Enterococcaceae;g__Enterococcus_D;s__Enterococcus_D_gallinarum	Enterococcus_D_gallinarum	0	0	0	2826	0	0	0	0	0	55846	0	0	0	0	0	0	0	0	0	0	0	0	0	35636	0	0	0	0	0	1410	235	0	0	0	0	0	0	0	0	0	0	0	0	0	287	0	0
	d__Bacteria;p__Proteobacteria;c__Gammaproteobacteria;o__Enterobacterales;f__Pasteurellaceae;g__Haemophilus;s__Haemophilus_seminalis	Haemophilus_seminalis	2576	17305	48776	0	343	0	993	0	0	0	0	23414	859	0	0	0	0	0	0	0	0	0	427	0	0	55337	0	0	0	0	1781	0	0	0	0	6711	0	0	0	449	4693	0	0	96	0	0	0
	d__Bacteria;p__Firmicutes_A;c__Clostridia;o__Oscillospirales;f__Oscillospiraceae;g__Flavonifractor;s__Flavonifractor_avistercoris	Flavonifractor_avistercoris	0	811	0	3343	0	0	0	0	0	3231	0	0	193	0	669	0	7554	10652	0	521	0	0	0	4806	12557	0	0	0	0	78	0	0	5478	0	0	0	7675	430	0	7000	0	0	0	0	0	3511	1867
	d__Bacteria;p__Firmicutes;c__Bacilli;o__Erysipelotrichales;f__Erysipelotrichaceae;g__Holdemanella;s__Holdemanella_biformis	Holdemanella_biformis	0	0	0	0	0	0	0	0	0	0	76780	0	0	12055	0	0	0	376	5242	7328	11606	72189	1412	0	0	0	0	0	0	0	0	0	0	0	0	0	0	1315	0	6547	1401	0	2706	97201	37462	0	0
	d__Bacteria;p__Bacteroidota;c__Bacteroidia;o__Bacteroidales;f__Bacteroidaceae;g__Prevotella;s__Prevotella_sp002439605	Prevotella_sp002439605	0	1942	0	0	0	0	0	0	0	0	36053	0	6462	13904	301	0	2569	6896	2727	2229	3257	2410	6085	0	0	0	0	0	0	19	0	0	0	0	0	0	496	23428	65521	2025	4047	0	27787	0	0	194	0
	d__Bacteria;p__Bacteroidota;c__Bacteroidia;o__Bacteroidales;f__Bacteroidaceae;g__Phocaeicola;s__Phocaeicola_sp002493165	Phocaeicola_sp002493165	0	163	0	0	0	0	0	0	0	0	0	0	446	0	1653	0	0	79	0	962	0	898	40	1083	0	0	0	0	0	0	0	0	0	4817	0	0	0	2592	39	3991	0	2153	0	0	0	1404	2237
	d__Bacteria;p__Firmicutes;c__Bacilli;o__Erysipelotrichales;f__Erysipelotrichaceae;g__Holdemanella;s__Holdemanella_porci	Holdemanella_porci	0	0	0	0	0	0	0	0	0	0	2797	0	0	52112	0	0	0	4078	0	36178	19137	11869	11250	0	0	0	0	0	0	0	0	0	0	0	0	0	0	48645	0	0	29699	0	8686	15979	1636	0	0
	d__Bacteria;p__Firmicutes_A;c__Clostridia;o__Oscillospirales;f__Ruminococcaceae;g__CAG-353;s__CAG-353_sp900066885	CAG-353_sp900066885	0	0	0	0	0	0	0	0	0	0	0	0	0	0	0	0	0	0	8156	0	0	0	0	0	0	0	0	0	0	0	0	0	0	0	0	0	0	0	0	0	0	0	0	0	0	0	0
	d__Bacteria;p__Proteobacteria;c__Gammaproteobacteria;o__Enterobacterales;f__Succinivibrionaceae;g__Succinivibrio;s__Succinivibrio_sp000431835	Succinivibrio_sp000431835	0	0	0	0	0	0	0	0	0	0	0	0	0	5730	0	0	0	0	0	0	0	103464	0	0	0	0	0	0	0	0	0	0	0	0	0	0	0	2289	0	0	0	0	0	0	0	0	0
	d__Bacteria;p__Bacteroidota;c__Bacteroidia;o__Bacteroidales;f__Bacteroidaceae;g__Bacteroides;s__Bacteroides_graminisolvens	Bacteroides_graminisolvens	0	1896	0	0	0	0	0	490	0	0	1728	0	3270	392	2867	0	394	1011	0	3415	0	2367	2503	6791	0	0	0	0	0	0	723	0	0	606	0	125	2615	5394	1747	8053	0	1646	0	0	0	3389	2855
	d__Bacteria;p__Firmicutes_A;c__Clostridia;o__Lachnospirales;f__Lachnospiraceae;g__Acetatifactor;s__unknown	unknown	0	0	0	0	0	0	0	0	0	0	6430	0	5354	3761	727	0	0	0	6960	5988	0	15998	13779	0	0	0	0	0	0	0	0	0	0	0	0	0	0	993	0	0	0	14814	0	0	0	8217	50056
	d__Bacteria;p__Firmicutes_A;c__Clostridia;o__Oscillospirales;f__Oscillospiraceae;g__Dysosmobacter;s__Dysosmobacter_sp001916835	Dysosmobacter_sp001916835	0	0	0	0	0	0	0	0	0	0	88274	0	0	28532	0	0	0	0	8139	250	17954	86975	8235	0	0	0	0	0	0	0	0	0	0	0	0	0	0	28904	0	0	0	25587	0	0	0	132	67
	d__Bacteria;p__Firmicutes_A;c__Clostridia;o__Lachnospirales;f__Lachnospiraceae;g__Acetatifactor;s__Acetatifactor_sp003447295	Acetatifactor_sp003447295	0	0	0	0	0	0	0	0	0	0	40846	0	3295	53507	275	0	0	0	25627	3391	0	49050	13010	0	0	0	0	0	0	0	0	0	0	0	0	0	0	275	0	0	0	5249	0	0	0	2209	24620
	d__Bacteria;p__Firmicutes_A;c__Clostridia;o__Lachnospirales;f__Lachnospiraceae;g__Sellimonas;s__Sellimonas_intestinalis	Sellimonas_intestinalis	0	0	0	54035	0	0	0	0	0	0	0	0	0	0	0	0	0	0	0	0	0	0	0	0	0	0	0	0	0	0	0	0	0	0	0	0	0	0	0	0	0	0	0	0	0	38805	21589
	d__Bacteria;p__Firmicutes;c__Bacilli;o__Staphylococcales;f__Staphylococcaceae;g__Staphylococcus;s__Staphylococcus_aureus	Staphylococcus_aureus	24584	0	228291	0	0	366	1536	0	0	0	0	0	0	0	0	0	0	0	0	0	0	0	0	0	0	7948	0	0	0	0	1291	0	0	0	0	0	0	0	0	0	0	0	0	0	0	0	0
	d__Bacteria;p__Bacteroidota;c__Bacteroidia;o__Bacteroidales;f__Bacteroidaceae;g__Prevotella;s__Prevotella_sp900552675	Prevotella_sp900552675	0	1343	0	0	0	0	0	0	0	0	1248	0	4274	1701	0	0	0	9223	0	0	42223	655	0	0	0	0	0	0	0	0	0	0	0	0	0	0	363	720	114	0	0	0	67750	0	0	0	0
	d__Bacteria;p__Firmicutes_A;c__Clostridia;o__Lachnospirales;f__Cellulosilyticaceae;g__Niameybacter;s__Niameybacter_stercoravium	Niameybacter_stercoravium	0	0	0	0	0	0	0	0	0	0	0	0	0	0	0	0	0	0	0	0	0	0	0	0	0	0	0	0	0	0	0	0	0	0	0	0	0	0	0	0	0	0	0	0	0	0	0
	d__Bacteria;p__Firmicutes_A;c__Clostridia;o__Oscillospirales;f__Butyricicoccaceae;g__Agathobaculum;s__Agathobaculum_butyriciproducens	Agathobaculum_butyriciproducens	0	1722	0	0	0	0	0	0	0	0	4445	0	31855	6613	1933	0	1697	10830	2956	3468	457	1173	29390	0	0	0	0	0	0	0	0	0	0	0	0	1017	44511	7257	1107	0	1132	23748	1241	0	0	31038	4415
	d__Bacteria;p__Proteobacteria;c__Gammaproteobacteria;o__Burkholderiales;f__Burkholderiaceae;g__Sutterella;s__Sutterella_wadsworthensis_A	Sutterella_wadsworthensis_A	0	0	0	0	0	0	0	0	0	0	0	0	0	0	0	0	0	0	0	0	0	0	0	0	0	0	0	0	0	0	0	0	0	0	0	0	0	9321	0	0	0	0	0	0	0	0	0
	d__Bacteria;p__Firmicutes_A;c__Clostridia;o__Peptostreptococcales;f__Peptostreptococcaceae;g__Romboutsia;s__Romboutsia_timonensis	Romboutsia_timonensis	0	0	0	0	0	0	0	0	0	0	0	0	0	0	0	0	0	0	0	0	0	0	0	0	0	0	0	0	0	0	0	0	0	0	0	0	0	0	0	0	0	0	0	0	0	0	0
	d__Bacteria;p__Firmicutes_A;c__Clostridia;o__Lachnospirales;f__Lachnospiraceae;g__Blautia_A;s__Blautia_A_obeum	Blautia_A_obeum	0	0	0	0	0	0	0	0	0	0	5179	0	18021	2594	13354	0	0	4784	6095	41691	12319	1436	6543	0	0	0	0	0	0	183	0	0	0	0	0	10486	2133	138	498	0	0	3825	8851	0	0	0	0
	d__Bacteria;p__Bacteroidota;c__Bacteroidia;o__Bacteroidales;f__Bacteroidaceae;g__Bacteroides;s__Bacteroides_faecichinchillae	Bacteroides_faecichinchillae	0	2094	0	1031	0	0	0	0	0	0	3826	0	5838	936	3262	0	0	1389	101	3686	0	5962	2097	11774	0	0	0	0	0	0	0	0	0	827	0	0	4828	5100	2309	11113	0	0	0	0	0	2703	909
	d__Bacteria;p__Proteobacteria;c__Gammaproteobacteria;o__Enterobacterales;f__Enterobacteriaceae;g__Citrobacter_A;s__Citrobacter_A_telavivensis	Citrobacter_A_telavivensis	0	219	72	0	441	0	290	0	2729	0	0	0	72	0	0	724	0	0	0	0	0	0	0	1100	1303	0	660	293	4223	0	290	874	510	2986	0	0	0	0	0	364	0	0	0	657	0	0	0
	d__Bacteria;p__Actinobacteriota;c__Actinomycetia;o__Actinomycetales;f__Bifidobacteriaceae;g__Bifidobacterium;s__Bifidobacterium_sp002298605	Bifidobacterium_sp002298605	10630	5672	3159	3320	14700	7175	8577	2302	6210	11821	0	1837	2186	0	4277	9671	902	4517	0	0	3430	0	238	4227	0	8882	16086	10993	13754	4927	3274	4037	1986	85	9372	433	8425	393	894	798	11294	96	984	3830	2550	2178	1043
	d__Bacteria;p__Proteobacteria;c__Gammaproteobacteria;o__Enterobacterales;f__Enterobacteriaceae;g__Yokenella;s__Yokenella_regensburgei	Yokenella_regensburgei	10930	1109	318	0	492	3731	1169	0	4389	374	0	86	485	0	0	3320	199	28	0	0	0	0	0	85	1749	0	636	375	15917	0	919	1136	2159	5726	0	282	0	0	0	627	0	0	0	913	0	228	0
	d__Bacteria;p__Bacteroidota;c__Bacteroidia;o__Bacteroidales;f__Rikenellaceae;g__Alistipes;s__Alistipes_sp900549305	Alistipes_sp900549305	0	0	0	0	0	0	0	0	0	0	0	0	1334	4223	0	0	0	0	1867	187	0	25918	0	0	0	0	0	0	0	0	0	0	0	0	0	0	0	184356	14530	0	0	0	0	0	0	9892	26104
	d__Bacteria;p__Firmicutes_A;c__Clostridia;o__Oscillospirales;f__Ruminococcaceae;g__Faecalibacterium;s__unknown	unknown	0	9044	0	0	0	0	0	0	0	0	7647	0	5467	142	0	15674	0	2774	2960	2489	2817	370	16956	1506	0	0	0	0	0	0	0	0	0	407	0	2633	1141	221	3569	0	754	4527	682	6176	52049	9561	906
	d__Bacteria;p__Firmicutes;c__Bacilli;o__Lactobacillales;f__Lactobacillaceae;g__Lacticaseibacillus;s__Lacticaseibacillus_rhamnosus	Lacticaseibacillus_rhamnosus	0	0	0	7706	0	0	0	1182	19021	0	0	0	0	0	0	0	0	0	0	0	0	0	0	0	0	0	0	0	0	7173	0	0	1585	0	0	0	0	0	0	0	0	0	0	0	48408	0	0
	d__Bacteria;p__Firmicutes_A;c__Clostridia;o__Lachnospirales;f__Lachnospiraceae;g__Enterocloster;s__Enterocloster_citroniae	Enterocloster_citroniae	0	0	0	0	0	0	0	0	0	0	0	0	0	0	1067	0	4176	0	0	0	0	0	0	0	0	0	0	0	0	0	0	0	0	0	0	40767	1816	0	0	0	0	6171	0	0	2081	2947	1563
	d__Bacteria;p__Proteobacteria;c__Gammaproteobacteria;o__Enterobacterales;f__Enterobacteriaceae;g__Superficieibacter;s__Superficieibacter_sp900766525	Superficieibacter_sp900766525	9300	450	74	0	514	2371	187	0	3094	0	0	0	112	0	0	2359	73	0	0	0	0	0	0	73	3758	0	656	405	14908	0	550	557	225	3182	0	0	0	0	0	333	0	0	0	475	0	37	0
	d__Bacteria;p__Firmicutes_A;c__Clostridia;o__Lachnospirales;f__Lachnospiraceae;g__Anaerostipes;s__Anaerostipes_hadrus_A	Anaerostipes_hadrus_A	0	0	0	0	0	0	0	0	0	0	0	0	672	0	2701	0	0	392	0	0	0	0	2739	0	0	0	0	0	0	0	0	0	0	0	0	4855	0	3295	1257	0	0	0	0	1242	844	2565	2223
	d__Bacteria;p__Firmicutes_A;c__Clostridia;o__Oscillospirales;f__Ruminococcaceae;g__Faecalibacterium;s__Faecalibacterium_prausnitzii_A	Faecalibacterium_prausnitzii_A	0	0	0	0	0	0	0	0	0	0	96141	0	0	109658	0	0	0	0	0	0	0	7363	43394	0	0	0	0	0	0	0	0	0	0	0	0	0	0	281	10224	0	0	220	0	0	0	0	0
	d__Bacteria;p__Firmicutes_A;c__Clostridia;o__Lachnospirales;f__Lachnospiraceae;g__Blautia_A;s__Blautia_A_sp003477525	Blautia_A_sp003477525	0	2342	0	1348	0	0	0	0	0	1901	1561	0	1716	2232	1110	3607	2874	3033	938	377	92	9688	989	474	0	0	0	0	0	428	0	0	0	0	0	835	3403	1587	4847	0	0	908	3135	1963	2062	4189	1742
	d__Bacteria;p__Firmicutes_A;c__Clostridia;o__Oscillospirales;f__Acutalibacteraceae;g__Clostridium_E;s__Clostridium_E_sporosphaeroides	Clostridium_E_sporosphaeroides	0	0	0	0	0	0	0	0	0	0	0	0	0	0	0	0	0	0	0	0	0	0	0	0	0	0	0	0	0	0	0	0	0	0	0	0	0	0	0	0	0	0	0	0	0	0	0
	d__Bacteria;p__Firmicutes_A;c__Clostridia;o__Lachnospirales;f__Lachnospiraceae;g__Blautia_A;s__Blautia_A_luti	Blautia_A_luti	0	2119	0	656	0	0	0	0	0	1674	1336	0	1361	1845	1011	3070	1891	3384	413	100	261	10391	1041	330	0	0	0	0	0	33	0	0	0	0	0	1005	2915	1104	4751	0	0	324	1907	941	1092	2984	1892
	d__Bacteria;p__Firmicutes_A;c__Clostridia;o__Lachnospirales;f__Lachnospiraceae;g__Extibacter;s__Extibacter_hylemonae	Extibacter_hylemonae	0	0	0	0	0	0	0	0	0	0	0	0	3618	0	0	0	0	0	0	0	0	10376	323	0	0	0	0	0	0	0	0	0	0	0	0	0	224032	0	0	0	0	0	0	0	0	142	0
	d__Bacteria;p__Firmicutes;c__Bacilli;o__Staphylococcales;f__Staphylococcaceae;g__Staphylococcus;s__Staphylococcus_epidermidis	Staphylococcus_epidermidis	53859	0	19032	0	0	3953	2228	0	0	0	0	0	0	0	0	0	0	0	0	0	0	0	0	0	0	0	608	0	0	0	2147	1539	0	0	0	0	0	0	0	0	4450	0	0	0	0	0	0
	d__Bacteria;p__Firmicutes_C;c__Negativicutes;o__Selenomonadales;f__Selenomonadaceae;g__Mitsuokella;s__Mitsuokella_sp900552565	Mitsuokella_sp900552565	0	0	0	109	0	0	0	0	0	0	0	0	0	0	0	0	1848	0	0	81	27	0	0	0	0	0	0	0	0	0	0	0	0	0	0	0	0	0	123502	132183	4410	0	0	0	0	0	0
	d__Bacteria;p__Firmicutes_A;c__Clostridia;o__Clostridiales;f__Clostridiaceae;g__Clostridium;s__Clostridium_sp018372555	Clostridium_sp018372555	54954	0	0	9676	0	0	0	0	0	11037	0	0	0	0	0	0	0	0	0	0	0	0	0	0	0	0	0	0	0	25790	0	0	0	0	0	0	0	0	0	0	0	0	0	0	0	0	0
	d__Bacteria;p__Firmicutes_C;c__Negativicutes;o__Acidaminococcales;f__Acidaminococcaceae;g__Phascolarctobacterium;s__Phascolarctobacterium_faecium	Phascolarctobacterium_faecium	0	0	0	0	0	0	0	0	0	0	0	0	0	0	0	0	0	0	0	0	0	0	0	0	0	0	0	0	0	0	0	0	0	0	0	0	0	0	0	1923	0	0	0	0	0	0	0
	d__Bacteria;p__Proteobacteria;c__Gammaproteobacteria;o__Enterobacterales;f__Enterobacteriaceae;g__Enterobacter_A;s__Enterobacter_A_timonensis	Enterobacter_A_timonensis	5314	418	22	0	200	2066	439	0	2409	154	0	109	175	0	0	1369	109	0	0	0	0	0	0	0	1776	0	533	485	20275	66	807	574	900	2649	0	109	43	0	0	531	0	0	0	702	22	282	0
	d__Bacteria;p__Firmicutes_A;c__Clostridia;o__Oscillospirales;f__Ruminococcaceae;g__Gemmiger;s__Gemmiger_sp900539695	Gemmiger_sp900539695	0	0	0	0	0	0	0	0	0	0	4003	0	46	8920	0	0	0	0	161	822	0	5659	0	0	0	0	0	0	0	0	0	0	0	0	0	0	0	47440	82735	0	0	71468	0	0	0	242	202
	d__Bacteria;p__Bacteroidota;c__Bacteroidia;o__Bacteroidales;f__Rikenellaceae;g__Alistipes;s__Alistipes_sp902363575	Alistipes_sp902363575	0	0	0	0	0	0	0	0	0	0	0	0	1091	524	4105	0	0	1300	452	17986	0	4361	470	0	0	0	0	0	0	0	0	0	0	0	0	0	0	5831	0	0	0	0	0	0	0	15615	54551
	d__Bacteria;p__Firmicutes_A;c__Clostridia;o__Oscillospirales;f__Acutalibacteraceae;g__Fimenecus;s__Fimenecus_sp002437245	Fimenecus_sp002437245	0	0	0	0	0	0	0	0	0	0	0	0	14138	1255	0	0	0	37211	1719	5027	708	15538	29258	0	0	0	0	0	0	0	0	0	0	0	0	0	0	3527	0	0	52	39562	0	0	0	0	0
	d__Bacteria;p__Firmicutes;c__Bacilli;o__Lactobacillales;f__Lactobacillaceae;g__Lactobacillus;s__Lactobacillus_acidophilus	Lactobacillus_acidophilus	0	0	0	0	0	0	446	0	2295	0	0	82	0	21	0	0	0	0	0	0	0	0	0	0	0	0	0	0	0	0	0	845	0	0	0	0	0	0	0	0	0	0	0	0	29599	0	0
	d__Bacteria;p__Firmicutes_A;c__Clostridia;o__Lachnospirales;f__Lachnospiraceae;g__Coprococcus;s__Coprococcus_eutactus_A	Coprococcus_eutactus_A	0	0	0	0	0	0	0	0	0	0	0	0	0	0	0	0	0	0	1937	0	0	31039	0	0	0	0	0	0	0	0	0	0	0	0	0	0	0	0	0	0	0	0	0	0	0	0	0
	d__Bacteria;p__Firmicutes_A;c__Clostridia;o__Oscillospirales;f__Oscillospiraceae;g__CAG-83;s__CAG-83_sp900556015	CAG-83_sp900556015	0	0	0	0	0	0	0	0	0	0	762	0	0	0	0	0	0	0	2657	0	0	1028	0	0	0	0	0	0	0	0	0	0	0	0	0	0	0	244355	0	0	0	0	0	0	0	0	0
	d__Bacteria;p__Bacteroidota;c__Bacteroidia;o__Bacteroidales;f__Bacteroidaceae;g__Bacteroides;s__Bacteroides_oleiciplenus	Bacteroides_oleiciplenus	0	169	0	0	0	0	0	0	0	0	3689	0	401	309	900	0	0	306	0	1676	0	6337	1708	459	0	0	0	0	0	0	0	0	0	0	0	0	111	1855	965	718	0	0	0	0	0	1563	1011
	d__Bacteria;p__Bacteroidota;c__Bacteroidia;o__Bacteroidales;f__Tannerellaceae;g__;s__unknown	unknown	0	1427	0	0	0	0	0	0	0	0	179	0	1347	610	949	0	0	45	0	2261	0	3764	645	0	0	0	0	0	0	0	0	0	0	15307	0	0	0	2191	0	44	0	634	0	0	0	0	0
	d__Bacteria;p__Proteobacteria;c__Gammaproteobacteria;o__Enterobacterales;f__Enterobacteriaceae;g__Lelliottia;s__Lelliottia_nimipressuralis	Lelliottia_nimipressuralis	935	243	0	0	385	242	0	0	2658	0	0	0	0	0	0	1524	0	0	0	0	0	0	0	0	1208	0	389	0	15532	0	147	245	196	2269	0	0	0	0	0	48	0	0	0	201	0	49	0
	d__Bacteria;p__Actinobacteriota;c__Coriobacteriia;o__Coriobacteriales;f__Atopobiaceae;g__Parolsenella;s__Parolsenella_catena	Parolsenella_catena	0	7722	0	0	0	24788	0	0	25132	4226	0	0	36026	0	2943	8258	2022	3981	0	467	1597	4128	42751	5436	0	0	0	1186	4378	0	0	0	0	0	2509	374	7140	322	0	264	12769	0	41745	0	0	0	0
	d__Bacteria;p__Bacteroidota;c__Bacteroidia;o__Bacteroidales;f__Tannerellaceae;g__Parabacteroides;s__Parabacteroides_sp900760525	Parabacteroides_sp900760525	0	5772	0	0	0	0	0	0	0	0	0	0	7502	1689	0	0	0	0	871	0	0	0	0	0	0	0	0	0	0	0	0	0	0	0	0	0	0	0	0	0	0	0	0	0	0	0	0
	d__Bacteria;p__Firmicutes_A;c__Clostridia;o__Lachnospirales;f__Lachnospiraceae;g__Blautia;s__Blautia_hominis	Blautia_hominis	0	0	0	0	0	0	0	0	0	0	0	0	0	0	0	0	0	0	0	0	0	0	0	0	0	0	0	0	0	0	0	0	0	0	0	0	0	0	0	0	0	0	0	0	0	0	0
	d__Bacteria;p__Firmicutes_A;c__Clostridia;o__Lachnospirales;f__CAG-274;g__JAHALF01;s__JAHALF01_sp018371275	JAHALF01_sp018371275	158549	0	0	0	4753	6013	0	0	0	0	0	0	0	0	0	4320	0	0	0	0	0	0	0	0	0	29320	0	0	0	0	0	0	3969	0	0	0	1400	0	0	0	0	0	0	0	0	0	0
	d__Bacteria;p__Firmicutes;c__Bacilli;o__Lactobacillales;f__Lactobacillaceae;g__Limosilactobacillus;s__Limosilactobacillus_oris	Limosilactobacillus_oris	0	0	0	0	0	0	0	0	0	0	0	56539	0	0	0	0	0	0	0	0	0	0	0	0	0	0	0	0	0	0	0	0	0	0	0	0	0	0	0	0	0	0	0	1888	184236	0	0
	d__Bacteria;p__Firmicutes;c__Bacilli;o__Lactobacillales;f__Enterococcaceae;g__Enterococcus_B;s__Enterococcus_B_faecium	Enterococcus_B_faecium	0	0	0	0	0	0	0	0	0	4500	0	0	0	0	0	0	0	0	0	0	0	0	0	0	0	0	0	0	0	0	0	0	0	0	0	0	0	0	0	0	0	0	0	5755	2043	0	0
	d__Bacteria;p__Firmicutes_A;c__Clostridia;o__Lachnospirales;f__Lachnospiraceae;g__Clostridium_Q;s__Clostridium_Q_fessum	Clostridium_Q_fessum	0	0	0	0	0	0	0	0	0	0	830	0	4585	5166	0	0	0	0	4817	1241	0	2130	0	0	0	0	0	0	0	0	0	0	0	0	0	51521	0	950	6380	0	7046	3232	0	0	0	0	0
	d__Bacteria;p__Campylobacterota;c__Campylobacteria;o__Campylobacterales;f__Campylobacteraceae;g__Campylobacter;s__Campylobacter_infans	Campylobacter_infans	0	0	0	0	0	0	0	0	0	0	210338	0	0	25779	0	0	0	0	0	0	3308	0	0	0	0	0	0	0	0	0	0	0	0	0	0	0	0	0	0	0	0	0	0	0	0	0	0
	d__Bacteria;p__Firmicutes_A;c__Clostridia;o__Oscillospirales;f__Ruminococcaceae;g__Gemmiger;s__Gemmiger_sp900540595	Gemmiger_sp900540595	0	0	0	0	0	0	0	0	0	0	938	0	7334	771	1629	0	0	4711	5983	23294	2731	389	3405	0	0	0	0	0	0	0	0	0	0	0	0	0	0	10157	1212	0	0	40640	856	0	0	6606	7099
	d__Bacteria;p__Actinobacteriota;c__Actinomycetia;o__Actinomycetales;f__Bifidobacteriaceae;g__Bifidobacterium;s__Bifidobacterium_leontopitheci	Bifidobacterium_leontopitheci	0	6040	0	3103	8793	7181	13844	0	3665	15282	0	6815	2538	0	6072	13868	1310	4765	0	12	1453	0	486	3027	0	613	17184	8237	9925	0	4304	2712	2455	0	0	124	5865	0	1881	2264	6388	247	1215	4210	2132	1037	797
	d__Bacteria;p__Proteobacteria;c__Gammaproteobacteria;o__Enterobacterales;f__Enterobacteriaceae;g__Atlantibacter;s__Atlantibacter_hermannii	Atlantibacter_hermannii	3559	1287	59	0	946	580	745	0	3687	293	0	0	176	0	0	2878	468	0	0	0	0	0	0	349	2114	0	1041	524	8153	0	2118	706	1790	3218	0	0	0	0	0	651	0	0	0	1127	0	0	0
	d__Bacteria;p__Proteobacteria;c__Gammaproteobacteria;o__Enterobacterales;f__Enterobacteriaceae;g__Enterobacter;s__Enterobacter_cancerogenus	Enterobacter_cancerogenus	69	0	0	0	0	0	0	0	424	0	0	0	0	0	0	69	0	0	0	0	0	0	0	0	481	0	0	0	18889	0	0	0	0	346	0	0	0	0	0	0	0	0	0	0	0	0	0
	d__Bacteria;p__Firmicutes_A;c__Clostridia;o__Oscillospirales;f__Ruminococcaceae;g__Ruminococcus_C;s__Ruminococcus_C_callidus	Ruminococcus_C_callidus	0	0	0	0	0	0	0	0	0	0	0	0	11603	0	18312	0	0	0	0	0	1106	6494	0	0	0	0	0	0	0	0	0	0	0	0	0	0	0	0	0	0	0	17684	0	0	0	0	0
	d__Bacteria;p__Firmicutes_A;c__Clostridia;o__Oscillospirales;f__Acutalibacteraceae;g__Eubacterium_R;s__Eubacterium_R_sp000436835	Eubacterium_R_sp000436835	0	0	0	0	0	0	0	0	0	0	0	0	0	0	0	0	0	0	0	0	47524	57992	0	0	0	0	0	0	0	0	0	0	0	0	0	0	0	0	0	0	0	0	0	0	0	0	0
	d__Bacteria;p__Firmicutes_A;c__Clostridia;o__Lachnospirales;f__Lachnospiraceae;g__Bariatricus;s__Bariatricus_comes	Bariatricus_comes	0	0	0	0	0	0	0	0	0	0	100122	0	303	13038	0	0	0	0	2806	2929	0	1535	2526	0	0	0	0	0	0	1477	0	0	0	0	0	0	0	20468	22082	0	0	8209	0	0	12425	0	0
	d__Bacteria;p__Bacteroidota;c__Bacteroidia;o__Bacteroidales;f__Bacteroidaceae;g__Bacteroides;s__Bacteroides_sp014385165	Bacteroides_sp014385165	0	1694	0	676	0	0	0	2609	0	0	1249	0	2397	442	2445	0	1948	549	195	3053	0	1699	1497	4745	0	0	0	0	0	0	2566	0	0	379	106	1296	4145	5645	919	3904	0	2410	0	0	0	3820	1616
	d__Bacteria;p__Bacteroidota;c__Bacteroidia;o__Bacteroidales;f__Bacteroidaceae;g__Prevotella;s__Prevotella_sp900553595	Prevotella_sp900553595	0	2294	0	0	0	0	0	0	0	0	9867	0	6987	43345	0	0	0	21565	0	0	7172	2325	0	0	0	0	0	0	0	0	0	0	0	0	0	0	729	0	0	0	0	0	23044	0	0	0	0
	d__Bacteria;p__Bacteroidota;c__Bacteroidia;o__Bacteroidales;f__Tannerellaceae;g__Parabacteroides;s__Parabacteroides_sp910577325	Parabacteroides_sp910577325	0	5090	0	0	0	0	0	0	0	0	0	0	7157	2120	0	0	0	0	0	0	0	77	0	0	0	0	0	0	0	0	0	0	0	0	0	0	0	0	0	0	0	0	0	0	0	0	0
	d__Bacteria;p__Firmicutes_A;c__Clostridia;o__Oscillospirales;f__Oscillospiraceae;g__CAG-83;s__CAG-83_sp900550615	CAG-83_sp900550615	0	0	0	0	0	0	0	0	0	0	219	0	0	73800	40068	0	0	0	14781	0	3050	93045	0	0	0	0	0	0	0	0	0	0	0	0	0	0	0	211	0	0	0	948	0	0	0	0	0
	d__Bacteria;p__Firmicutes_A;c__Clostridia;o__Oscillospirales;f__Acutalibacteraceae;g__Ruminococcus_E;s__Ruminococcus_E_sp003526955	Ruminococcus_E_sp003526955	0	0	0	0	0	0	0	0	0	0	0	0	0	0	0	0	0	0	0	0	5721	0	0	0	0	0	0	0	0	0	0	0	0	0	0	0	0	0	0	0	0	0	0	0	0	0	0
	d__Bacteria;p__Firmicutes_A;c__Clostridia;o__Lachnospirales;f__Lachnospiraceae;g__Anaerostipes;s__Anaerostipes_sp018918155	Anaerostipes_sp018918155	0	0	0	0	0	0	0	0	0	0	0	0	279	115	394	0	0	0	0	3022	0	5611	1448	0	0	0	0	0	0	0	0	0	0	0	0	2341	0	1520	1066	0	0	0	0	208	182	1346	79286
	d__Bacteria;p__Bacteroidota;c__Bacteroidia;o__Bacteroidales;f__Bacteroidaceae;g__Prevotella;s__Prevotella_sp000436915	Prevotella_sp000436915	0	0	0	0	0	0	0	0	0	0	0	0	83740	0	0	0	0	33496	0	0	0	0	0	0	0	0	0	0	0	0	0	0	0	0	0	0	0	0	0	0	0	0	83740	0	0	0	0
	d__Bacteria;p__Firmicutes_A;c__Clostridia;o__Clostridiales;f__Clostridiaceae;g__Clostridium;s__Clostridium_sp000435835	Clostridium_sp000435835	0	0	0	0	0	0	0	0	0	0	0	0	0	0	0	0	0	0	0	0	0	0	1912	0	0	0	0	0	0	0	0	0	0	0	0	0	0	0	0	0	0	0	0	0	0	0	0
	d__Bacteria;p__Actinobacteriota;c__Actinomycetia;o__Actinomycetales;f__Bifidobacteriaceae;g__Bifidobacterium;s__Bifidobacterium_sp018555455	Bifidobacterium_sp018555455	13508	2478	2438	3496	11277	5691	5930	1646	4662	11766	0	581	899	0	3852	7155	673	2972	0	0	1775	0	0	4633	0	9695	9245	6798	8809	5422	1948	2467	1436	13	7679	236	5926	92	185	383	7602	0	746	2993	1922	1655	748
	d__Bacteria;p__Bacteroidota;c__Bacteroidia;o__Bacteroidales;f__Bacteroidaceae;g__Prevotella;s__Prevotella_sp002251385	Prevotella_sp002251385	0	2895	0	0	0	0	0	0	0	0	422	0	48613	2171	0	0	0	1617	0	0	67427	0	0	0	0	0	0	0	0	0	0	0	0	0	0	0	0	783	0	0	0	0	3688	0	0	0	0
	d__Bacteria;p__Actinobacteriota;c__Actinomycetia;o__Actinomycetales;f__Bifidobacteriaceae;g__Bifidobacterium;s__unknown	unknown	9220	57	3638	221	13111	7212	7774	1692	6577	13068	0	1181	1778	0	58	28	650	116	0	0	3448	0	0	4455	0	3583	14084	10562	11461	5260	3015	4100	2572	0	8455	188	8540	240	294	380	86	0	1229	3304	2549	2462	1252
	d__Bacteria;p__Firmicutes_A;c__Clostridia;o__Lachnospirales;f__Lachnospiraceae;g__Eisenbergiella;s__Eisenbergiella_sp900066775	Eisenbergiella_sp900066775	0	0	0	0	0	0	0	0	0	0	2770	0	0	6814	148	0	0	0	6854	2818	0	538	4362	0	0	0	0	0	0	0	0	0	0	0	0	0	0	18978	3261	0	0	43119	0	0	0	0	0
	d__Bacteria;p__Bacteroidota;c__Bacteroidia;o__Bacteroidales;f__Bacteroidaceae;g__Prevotella;s__Prevotella_sp900544495	Prevotella_sp900544495	0	269	0	0	0	0	0	0	0	0	868	0	441	1633	0	0	0	67511	0	0	54507	506	0	0	0	0	0	0	0	0	0	0	0	0	0	0	3159	0	0	0	0	0	2542	0	0	0	0
	d__Bacteria;p__Bacteroidota;c__Bacteroidia;o__Bacteroidales;f__Tannerellaceae;g__Parabacteroides;s__Parabacteroides_johnsonii	Parabacteroides_johnsonii	0	662	0	0	0	0	0	0	0	0	0	0	747	829	0	0	0	0	0	0	0	0	0	0	0	0	0	0	0	0	0	0	0	0	0	0	0	0	0	0	0	0	0	0	0	0	0
	d__Bacteria;p__Bacteroidota;c__Bacteroidia;o__Bacteroidales;f__Tannerellaceae;g__Parabacteroides;s__Parabacteroides_sp011038785	Parabacteroides_sp011038785	0	963	0	0	0	0	0	0	0	0	911	0	386	296	1309	0	0	909	459	2549	124	6059	1518	0	0	0	0	0	0	0	0	0	0	17233	216	0	0	4996	0	0	0	0	0	0	0	0	0
	d__Bacteria;p__Firmicutes_A;c__Clostridia;o__Lachnospirales;f__Lachnospiraceae;g__Fusicatenibacter;s__Fusicatenibacter_sp900772675	Fusicatenibacter_sp900772675	0	0	0	0	0	0	0	0	0	0	1390	0	1279	21841	0	0	0	0	0	259	0	2481	991	0	0	0	0	0	0	0	0	0	0	0	0	0	0	902	1355	0	0	3076	0	0	0	253	0
	d__Bacteria;p__Firmicutes;c__Bacilli;o__Erysipelotrichales;f__Coprobacillaceae;g__Coprobacillus;s__Coprobacillus_cateniformis	Coprobacillus_cateniformis	0	0	0	0	0	0	0	0	0	0	0	0	0	0	0	0	18337	0	0	0	0	0	0	0	0	0	0	0	0	0	0	0	0	0	0	0	0	0	0	0	0	5459	0	0	0	0	0
	d__Bacteria;p__Bacteroidota;c__Bacteroidia;o__Bacteroidales;f__Bacteroidaceae;g__Bacteroides;s__Bacteroides_rodentium	Bacteroides_rodentium	0	259	0	0	0	0	0	0	0	0	819	0	288	1382	1519	0	0	85	620	5559	0	600	1224	324	0	0	0	0	0	0	0	0	0	0	0	0	0	5314	257	381	0	0	0	0	0	3267	5098
	d__Bacteria;p__Proteobacteria;c__Gammaproteobacteria;o__Enterobacterales;f__Enterobacteriaceae;g__RHBSTW-00994;s__RHBSTW-00994_sp013782625	RHBSTW-00994_sp013782625	540	301	49	0	149	99	75	0	1256	0	0	0	24	0	0	498	0	0	0	0	0	0	0	0	862	0	248	225	10802	0	172	370	199	1251	0	0	0	0	0	174	0	0	0	425	0	0	0
	d__Bacteria;p__Firmicutes_A;c__Clostridia;o__Lachnospirales;f__Lachnospiraceae;g__Mediterraneibacter;s__Mediterraneibacter_sp900752395	Mediterraneibacter_sp900752395	0	0	0	0	0	0	0	0	0	0	0	0	2776	0	225	0	0	0	3689	0	0	158	0	0	0	0	0	0	0	0	0	0	0	0	0	0	0	2909	0	593	0	921	0	0	0	11165	753
	d__Bacteria;p__Actinobacteriota;c__Actinomycetia;o__Actinomycetales;f__Bifidobacteriaceae;g__Bifidobacterium;s__Bifidobacterium_sp012932425	Bifidobacterium_sp012932425	11559	3241	2515	2070	9430	4008	5009	1867	3883	7578	0	470	1093	0	3481	4620	499	3569	0	0	1725	44	111	3625	0	8386	8063	6217	8232	4361	2019	2088	1854	45	7674	324	4633	347	236	408	8770	11	880	2132	2095	1648	948
	d__Bacteria;p__Firmicutes_A;c__Clostridia;o__Lachnospirales;f__Lachnospiraceae;g__Enterocloster;s__Enterocloster_clostridioformis	Enterocloster_clostridioformis	0	0	0	0	0	0	0	0	0	0	0	0	0	0	0	0	0	0	0	0	0	0	0	0	0	0	0	0	0	0	0	0	0	0	0	415	0	0	0	0	0	0	0	0	0	24800	10035
	d__Bacteria;p__Proteobacteria;c__Gammaproteobacteria;o__Enterobacterales;f__Enterobacteriaceae;g__Ewingella;s__Ewingella_americana	Ewingella_americana	3217	207	0	0	0	967	343	0	2892	0	0	0	0	0	0	1623	0	0	0	0	0	0	0	0	623	0	0	0	13688	0	0	0	69	2245	0	0	0	0	0	0	0	0	0	0	0	0	0
	d__Bacteria;p__Bacteroidota;c__Bacteroidia;o__Bacteroidales;f__Bacteroidaceae;g__Bacteroides;s__Bacteroides_togonis	Bacteroides_togonis	0	489	0	0	0	0	0	0	0	0	1133	0	860	1030	1597	0	71	929	140	4340	0	1277	1017	1103	0	0	0	0	0	0	0	0	0	0	0	0	995	7333	854	2555	0	0	0	0	0	3646	4592
	d__Bacteria;p__Firmicutes_A;c__Clostridia;o__Lachnospirales;f__Lachnospiraceae;g__Eisenbergiella;s__Eisenbergiella_sp003478085	Eisenbergiella_sp003478085	0	0	0	0	0	0	0	0	0	0	0	0	0	0	2386	0	1435	0	0	0	0	0	0	0	0	0	0	0	0	0	0	0	0	0	0	0	296	0	0	0	0	0	0	0	0	8693	3101
	d__Bacteria;p__Actinobacteriota;c__Actinomycetia;o__Actinomycetales;f__Bifidobacteriaceae;g__Bifidobacterium;s__Bifidobacterium_moukalabense	Bifidobacterium_moukalabense	0	2990	0	920	278	618	332	0	2736	4654	0	0	1071	0	3048	2860	276	3932	0	0	2727	0	0	353	2099	412	111	301	438	197	110	27	0	0	0	108	167	710	297	0	7945	0	1139	166	406	81	569
	d__Bacteria;p__Firmicutes_A;c__Clostridia;o__Lachnospirales;f__Anaerotignaceae;g__Anaerotignum;s__Anaerotignum_faecicola	Anaerotignum_faecicola	0	0	0	0	0	0	0	0	0	0	5648	0	0	18077	7803	0	35061	0	3041	4890	19774	0	14498	0	0	0	0	0	0	0	0	0	0	0	0	0	0	17929	20689	0	0	26088	0	0	0	0	916
	d__Bacteria;p__Firmicutes_A;c__Clostridia;o__Lachnospirales;f__Lachnospiraceae;g__Butyrivibrio_A;s__Butyrivibrio_A_crossotus	Butyrivibrio_A_crossotus	0	0	0	0	0	0	0	0	0	0	0	0	0	115468	0	0	0	0	0	0	0	60351	0	0	0	0	0	0	0	0	0	0	0	0	0	0	0	20879	0	0	0	0	0	0	0	0	0
	d__Bacteria;p__Firmicutes_A;c__Clostridia;o__Clostridiales;f__Clostridiaceae;g__Clostridium;s__Clostridium_tertium	Clostridium_tertium	0	0	0	0	0	36687	0	21347	6842	0	0	0	0	0	0	6719	0	0	0	0	0	0	0	0	477	0	0	0	0	10033	0	0	6852	0	0	0	0	0	0	0	0	0	0	0	0	0	0
	d__Bacteria;p__Proteobacteria;c__Gammaproteobacteria;o__Enterobacterales;f__Enterobacteriaceae;g__Klebsiella;s__Klebsiella_terrigena	Klebsiella_terrigena	9861	0	0	0	0	3088	0	0	1343	0	0	0	0	0	0	1683	0	0	0	0	0	0	0	0	0	0	0	0	10952	0	0	0	0	1925	0	0	0	0	0	0	0	0	0	0	0	0	0
	d__Bacteria;p__Proteobacteria;c__Gammaproteobacteria;o__Enterobacterales;f__Enterobacteriaceae;g__Enterobacter_B;s__Enterobacter_B_lignolyticus	Enterobacter_B_lignolyticus	7556	308	140	0	622	2487	453	0	2786	117	0	70	118	0	0	1901	23	0	0	0	0	0	0	94	1112	0	427	377	12914	0	520	523	1098	2986	0	0	0	0	0	261	0	0	0	574	0	116	0
	d__Bacteria;p__Firmicutes;c__Bacilli;o__Erysipelotrichales;f__Coprobacillaceae;g__Faecalibacillus;s__Faecalibacillus_intestinalis	Faecalibacillus_intestinalis	0	0	0	0	0	0	0	0	0	0	0	0	0	6140	7439	0	1929	0	307	0	0	0	0	0	0	0	0	0	0	0	0	0	0	0	0	0	0	2189	5304	0	0	0	0	0	0	0	0
	d__Bacteria;p__Firmicutes_A;c__Clostridia;o__Oscillospirales;f__Oscillospiraceae;g__Lawsonibacter;s__Lawsonibacter_sp900066825	Lawsonibacter_sp900066825	0	0	0	0	0	0	0	0	0	0	0	0	0	0	0	0	0	0	0	11171	0	0	0	0	0	0	0	0	0	0	0	0	0	0	0	0	0	13631	0	0	0	0	0	0	0	5118	9241
	d__Bacteria;p__Firmicutes_A;c__Clostridia;o__Lachnospirales;f__Lachnospiraceae;g__Eubacterium_F;s__Eubacterium_F_sp003491505	Eubacterium_F_sp003491505	0	0	0	0	0	0	0	0	0	0	0	0	0	9377	0	0	0	0	0	0	0	34136	0	0	0	0	0	0	0	0	0	0	0	0	0	0	0	1420	0	0	0	56979	0	0	0	0	0
	d__Bacteria;p__Firmicutes_A;c__Clostridia;o__Lachnospirales;f__Lachnospiraceae;g__CAG-882;s__CAG-882_sp003486385	CAG-882_sp003486385	0	0	0	0	0	0	0	0	0	0	731	0	0	9357	0	0	0	0	0	0	0	6364	0	0	0	0	0	0	0	0	0	0	0	0	0	0	0	0	0	0	0	0	0	0	0	0	0
	d__Bacteria;p__Verrucomicrobiota;c__Verrucomicrobiae;o__Verrucomicrobiales;f__Akkermansiaceae;g__Akkermansia;s__Akkermansia_muciniphila_C	Akkermansia_muciniphila_C	0	0	0	0	0	0	0	0	0	0	715	0	676	0	0	0	33904	0	0	0	0	0	350	0	0	0	0	0	0	14041	0	0	22663	0	0	726	0	0	0	5623	0	0	0	0	0	0	0
	d__Bacteria;p__Bacteroidota;c__Bacteroidia;o__Bacteroidales;f__Rikenellaceae;g__Alistipes;s__Alistipes_sp009774895	Alistipes_sp009774895	0	0	0	0	0	0	0	0	0	0	0	0	982	457	2185	0	0	333	454	15835	0	7237	203	0	0	0	0	0	0	0	0	0	0	0	0	0	0	5789	0	0	0	0	0	0	0	11615	34580
	d__Bacteria;p__Actinobacteriota;c__Actinomycetia;o__Actinomycetales;f__Bifidobacteriaceae;g__Bifidobacterium;s__Bifidobacterium_pullorum_B	Bifidobacterium_pullorum_B	2788	5320	79	2707	7141	4446	8534	210	3265	10218	0	1095	1736	0	4634	7324	1036	5027	0	0	1499	0	0	3196	0	1968	13355	5512	5863	1354	2280	1774	1561	0	525	183	5149	27	396	658	9869	0	1057	2265	1424	1359	1166
	d__Bacteria;p__Bacteroidota;c__Bacteroidia;o__Bacteroidales;f__Bacteroidaceae;g__Bacteroides;s__Bacteroides_zoogleoformans	Bacteroides_zoogleoformans	0	334	0	0	0	0	0	0	0	0	890	0	437	2085	1704	0	0	797	348	4246	0	984	486	659	0	0	0	0	0	0	0	0	0	0	0	0	207	5105	276	1218	0	300	0	0	0	3814	6447
	d__Bacteria;p__Bacteroidota;c__Bacteroidia;o__Bacteroidales;f__Rikenellaceae;g__Alistipes;s__Alistipes_excrementavium	Alistipes_excrementavium	0	0	0	0	0	0	0	0	0	0	0	0	733	567	1935	0	0	89	186	15859	0	6583	60	0	0	0	0	0	0	0	0	0	0	0	0	0	0	5276	0	0	0	0	0	0	0	11744	37230
	d__Bacteria;p__Firmicutes_A;c__Clostridia;o__Oscillospirales;f__Ruminococcaceae;g__Anaerotruncus;s__Anaerotruncus_colihominis	Anaerotruncus_colihominis	0	0	0	0	0	0	0	0	0	0	3238	0	0	0	2952	0	0	0	0	6320	0	3837	0	0	0	0	0	0	0	10326	0	0	0	0	0	0	0	0	0	0	0	40679	0	0	0	11381	7401
	d__Bacteria;p__Bacteroidota;c__Bacteroidia;o__Bacteroidales;f__Bacteroidaceae;g__Bacteroides;s__unknown	unknown	0	142	0	32	0	0	0	6903	0	0	383	0	253	575	2276	0	112	103	35	3393	0	220	510	314	0	0	0	0	0	0	227	0	0	451	0	170	403	6557	358	367	0	66	0	0	0	3137	4784
	d__Bacteria;p__Proteobacteria;c__Gammaproteobacteria;o__Enterobacterales;f__Enterobacteriaceae;g__Enterobacter;s__Enterobacter_huaxiensis	Enterobacter_huaxiensis	0	0	0	0	0	0	0	0	0	0	0	0	0	0	0	0	0	0	0	0	0	0	0	0	0	0	0	0	14245	0	0	0	0	0	0	0	0	0	0	0	0	0	0	0	0	0	0
	d__Bacteria;p__Firmicutes_A;c__Clostridia;o__Oscillospirales;f__Ruminococcaceae;g__Gemmiger;s__Gemmiger_sp900540775	Gemmiger_sp900540775	0	0	0	0	0	0	0	0	0	0	0	0	20342	923	2388	0	0	4217	4153	6807	1087	3247	2581	0	0	0	0	0	0	0	0	0	0	0	0	0	0	12429	753	0	0	3497	437	0	0	5154	5479
	d__Bacteria;p__Firmicutes_A;c__Clostridia;o__Lachnospirales;f__Lachnospiraceae;g__UMGS2037;s__unknown	unknown	0	0	0	0	0	0	0	0	0	0	150179	0	0	161	0	0	0	0	31938	0	0	0	0	0	0	0	0	0	0	136	0	0	0	0	0	0	0	0	0	0	0	26	0	0	0	0	0
	d__Bacteria;p__Firmicutes_A;c__Clostridia;o__Lachnospirales;f__Lachnospiraceae;g__Anaerostipes;s__Anaerostipes_sp900756035	Anaerostipes_sp900756035	0	0	0	0	0	0	0	0	0	0	293	0	714	442	1118	191	0	505	0	17	0	591	2991	0	0	0	0	0	0	221	0	0	0	0	0	4642	0	2569	1660	0	0	569	0	943	624	2113	3401
	d__Bacteria;p__Firmicutes;c__Bacilli;o__Erysipelotrichales;f__Coprobacillaceae;g__Erysipelatoclostridium;s__Erysipelatoclostridium_cocleatum	Erysipelatoclostridium_cocleatum	0	0	0	2369	0	0	0	0	0	754	0	0	0	0	0	0	0	0	0	0	0	0	0	0	0	0	0	0	0	752	774	0	0	0	0	0	1061	0	35	0	0	242	0	0	0	35	691
	d__Bacteria;p__Proteobacteria;c__Gammaproteobacteria;o__Enterobacterales;f__Enterobacteriaceae;g__Kluyvera;s__Kluyvera_intermedia	Kluyvera_intermedia	2665	0	0	0	0	701	0	0	4631	0	0	0	0	0	0	1793	0	0	0	0	0	0	0	0	925	0	107	0	8179	0	0	216	326	2469	0	0	0	0	0	0	0	0	0	53	0	0	0
	d__Bacteria;p__Bacteroidota;c__Bacteroidia;o__Bacteroidales;f__Rikenellaceae;g__Alistipes;s__Alistipes_sp002428825	Alistipes_sp002428825	0	0	0	0	0	0	0	0	0	0	0	0	1077	568	2363	0	0	0	402	13348	0	8855	258	0	0	0	0	0	0	0	0	0	0	0	0	0	0	5849	0	0	0	0	0	0	0	9225	31349
	d__Bacteria;p__Firmicutes_A;c__Clostridia;o__Oscillospirales;f__Oscillospiraceae;g__Intestinimonas;s__Intestinimonas_butyriciproducens	Intestinimonas_butyriciproducens	0	0	0	0	0	0	0	0	0	0	546	0	0	74	0	0	0	0	0	0	0	2640	0	0	0	0	0	0	0	0	0	0	0	265	0	0	0	3634	0	0	0	3906	0	0	0	0	0
	d__Bacteria;p__Bacteroidota;c__Bacteroidia;o__Bacteroidales;f__Rikenellaceae;g__Alistipes;s__Alistipes_sp910575495	Alistipes_sp910575495	0	0	0	0	0	0	0	0	0	0	0	0	959	674	2545	0	0	0	305	9422	0	7766	263	0	0	0	0	0	0	0	0	0	0	0	0	0	0	7549	0	0	0	0	0	0	0	12429	46810
	d__Bacteria;p__Firmicutes;c__Bacilli;o__Lactobacillales;f__Streptococcaceae;g__Streptococcus;s__Streptococcus_vestibularis	Streptococcus_vestibularis	0	0	61162	0	0	8030	79309	0	0	0	0	0	0	0	0	0	0	0	0	0	0	0	0	1356	0	0	0	0	0	0	0	21906	1346	0	0	0	0	0	0	0	0	0	0	0	0	0	0
	d__Bacteria;p__Firmicutes_A;c__Clostridia;o__Oscillospirales;f__Oscillospiraceae;g__CAG-83;s__CAG-83_sp900552475	CAG-83_sp900552475	0	0	0	0	0	0	0	0	0	0	14067	0	0	56218	0	0	0	0	10688	0	452	83498	0	0	0	0	0	0	0	0	0	0	0	0	0	0	0	1819	0	0	0	4447	0	0	0	0	0
	d__Bacteria;p__Firmicutes_A;c__Clostridia;o__Lachnospirales;f__Lachnospiraceae;g__Coprococcus_A;s__Coprococcus_A_sp900548825	Coprococcus_A_sp900548825	0	0	0	0	0	0	0	0	0	0	3328	0	0	0	0	0	0	0	154851	0	0	1273	2160	0	0	0	0	0	0	0	0	0	0	0	0	0	0	8275	0	0	0	0	0	0	0	0	0
	d__Bacteria;p__Actinobacteriota;c__Actinomycetia;o__Actinomycetales;f__Bifidobacteriaceae;g__Bifidobacterium;s__Bifidobacterium_merycicum	Bifidobacterium_merycicum	3760	4566	142	1901	4325	5315	5306	120	2972	9255	0	436	2010	0	3707	6482	606	4427	0	0	2749	75	24	2897	0	2106	11396	3910	4781	2023	2676	1070	1182	0	852	258	4608	220	377	430	11168	0	1302	2874	1758	1120	892
	d__Bacteria;p__Firmicutes_A;c__Clostridia;o__Oscillospirales;f__Ruminococcaceae;g__Ruminococcus_C;s__Ruminococcus_C_sp000980705	Ruminococcus_C_sp000980705	0	0	0	0	0	0	0	0	0	0	0	0	24038	0	232	0	0	0	0	0	0	0	0	0	0	0	0	0	0	0	0	0	0	0	0	0	0	0	0	0	0	0	0	0	0	0	0
	d__Bacteria;p__Firmicutes_A;c__Clostridia;o__Oscillospirales;f__Oscillospiraceae;g__ER4;s__ER4_sp900550165	ER4_sp900550165	0	0	0	0	0	0	0	0	0	0	5955	0	0	27199	0	0	0	0	65219	0	2407	63908	0	0	0	0	0	0	0	0	0	0	0	0	0	0	0	776	0	0	0	386	0	0	0	0	0
	d__Bacteria;p__Bacteroidota;c__Bacteroidia;o__Bacteroidales;f__Tannerellaceae;g__Parabacteroides;s__Parabacteroides_massiliensis	Parabacteroides_massiliensis	0	5323	0	0	0	0	0	0	0	0	0	0	6138	1415	0	0	0	0	0	0	0	0	0	0	0	0	0	0	0	0	0	0	0	0	0	0	0	0	0	0	0	0	0	0	0	0	0
	d__Bacteria;p__Bacteroidota;c__Bacteroidia;o__Bacteroidales;f__Bacteroidaceae;g__Phocaeicola;s__Phocaeicola_coprocola	Phocaeicola_coprocola	0	230	0	0	0	0	0	0	0	0	606	0	599	0	1164	0	0	39	0	1653	0	649	442	1363	0	0	0	0	0	0	0	0	0	518	0	0	0	6661	121	2842	0	663	0	0	0	2739	2005
	d__Bacteria;p__Firmicutes;c__Bacilli;o__Erysipelotrichales;f__Coprobacillaceae;g__Erysipelatoclostridium;s__Erysipelatoclostridium_merdavium	Erysipelatoclostridium_merdavium	0	0	0	0	0	0	0	0	0	672	0	0	0	0	0	181	0	0	0	0	0	0	0	149	0	0	0	0	0	794	865	0	0	0	0	0	1139	0	0	0	0	467	0	0	25	0	248
	d__Bacteria;p__Bacteroidota;c__Bacteroidia;o__Bacteroidales;f__Rikenellaceae;g__Alistipes;s__Alistipes_dispar	Alistipes_dispar	0	0	0	0	0	0	0	0	0	0	0	0	730	703	1099	0	0	0	227	7286	0	8148	231	0	0	0	0	0	0	0	0	0	0	0	0	0	0	4013	0	0	0	0	0	0	0	16698	56431
	d__Bacteria;p__Firmicutes_A;c__Clostridia;o__Lachnospirales;f__Lachnospiraceae;g__CAG-127;s__CAG-127_sp900319515	CAG-127_sp900319515	0	0	0	0	0	0	0	0	0	0	13890	0	0	54741	0	0	0	0	12681	0	1512	5097	0	0	0	0	0	0	0	0	0	0	0	0	0	0	0	0	0	0	0	0	0	0	0	0	0
	d__Bacteria;p__Firmicutes_A;c__Clostridia;o__Lachnospirales;f__Lachnospiraceae;g__Enterocloster;s__Enterocloster_lavalensis	Enterocloster_lavalensis	0	0	0	0	0	0	0	0	0	0	0	0	0	0	0	0	0	0	0	0	0	0	0	0	0	0	0	0	0	0	0	0	0	0	0	0	0	0	0	0	0	0	0	0	0	0	0
	d__Bacteria;p__Proteobacteria;c__Gammaproteobacteria;o__Enterobacterales;f__Enterobacteriaceae;g__Pantoea;s__Pantoea_dispersa	Pantoea_dispersa	2390	0	0	0	0	1378	0	0	793	0	0	0	0	0	0	634	0	0	0	0	0	0	0	0	317	0	0	0	6175	0	0	0	0	703	0	0	0	0	0	0	0	0	0	0	0	0	0
	d__Bacteria;p__Actinobacteriota;c__Actinomycetia;o__Actinomycetales;f__Bifidobacteriaceae;g__Pseudoscardovia;s__Pseudoscardovia_suis	Pseudoscardovia_suis	3445	3507	1182	1728	6016	4392	4916	122	3172	8131	0	1184	1479	0	4298	6203	894	3133	0	0	1531	0	139	2275	0	1967	7723	5541	4996	1907	2048	1730	1408	0	1016	172	3562	282	589	523	7760	0	1449	2535	1242	1381	1283
	d__Bacteria;p__Bacteroidota;c__Bacteroidia;o__Bacteroidales;f__Bacteroidaceae;g__Bacteroides;s__Bacteroides_massiliensis_B	Bacteroides_massiliensis_B	0	645	0	29	0	0	0	303	0	0	1023	0	1168	1026	1542	0	464	861	149	3492	0	1801	966	1865	0	0	0	0	0	0	167	0	0	577	0	76	749	5153	766	2021	0	969	0	0	0	2752	3783
	d__Bacteria;p__Bacteroidota;c__Bacteroidia;o__Bacteroidales;f__Bacteroidaceae;g__Phocaeicola;s__Phocaeicola_sp900546645	Phocaeicola_sp900546645	0	0	0	0	0	0	0	0	0	0	457	0	594	0	743	0	0	67	0	1487	0	563	266	1190	0	0	0	0	0	0	0	0	0	1130	0	0	0	45773	268	2924	0	661	0	0	0	1737	1838
	d__Bacteria;p__Firmicutes_A;c__Clostridia;o__Lachnospirales;f__Lachnospiraceae;g__Eubacterium_I;s__Eubacterium_I_ramulus	Eubacterium_I_ramulus	0	0	0	0	0	0	0	0	0	0	3790	0	2305	22392	0	0	0	0	1795	3626	3271	3216	3633	0	0	0	0	0	0	0	0	0	0	0	0	0	0	11017	0	0	0	175	0	0	0	0	0
	d__Bacteria;p__Bacteroidota;c__Bacteroidia;o__Bacteroidales;f__Bacteroidaceae;g__Phocaeicola;s__unknown	unknown	0	247	0	0	0	0	0	0	0	0	398	0	560	484	870	0	0	146	145	1010	0	733	659	971	0	0	0	0	0	0	0	0	0	867	0	0	24	8244	290	2134	0	630	0	0	0	1043	842
	d__Bacteria;p__Firmicutes_A;c__Clostridia;o__Lachnospirales;f__Lachnospiraceae;g__Lachnospira;s__Lachnospira_sp900772425	Lachnospira_sp900772425	0	0	0	0	0	0	0	0	0	0	0	0	207	1008	0	0	0	0	361	612	0	51	2510	0	0	0	0	0	0	0	0	0	0	0	0	15511	0	0	697	0	0	2192	0	0	0	0	0
	d__Bacteria;p__Firmicutes_A;c__Clostridia;o__Oscillospirales;f__Ruminococcaceae;g__Gemmiger;s__Gemmiger_sp900554145	Gemmiger_sp900554145	0	0	0	0	0	0	0	0	0	0	0	0	6669	481	1660	0	0	4699	4941	1787	2605	561	3242	0	0	0	0	0	0	0	0	0	0	0	0	0	0	8705	713	0	0	3721	321	0	0	5468	5694
	d__Bacteria;p__Firmicutes_C;c__Negativicutes;o__Veillonellales;f__Dialisteraceae;g__Allisonella;s__Allisonella_histaminiformans	Allisonella_histaminiformans	0	0	0	666	0	0	0	0	6566	8054	0	0	353	0	241	5278	0	1837	0	0	2407	0	0	0	0	0	0	7086	0	0	30464	30479	764	0	0	0	0	0	9020	6030	28375	0	5022	0	9419	0	0
	d__Bacteria;p__Firmicutes_A;c__Clostridia;o__Lachnospirales;f__Lachnospiraceae;g__Lachnospira;s__Lachnospira_sp003537285	Lachnospira_sp003537285	0	0	0	0	0	0	0	0	0	0	429	0	0	375	0	0	0	0	110	259	0	0	1674	0	0	0	0	0	0	0	0	0	0	0	0	12253	0	0	626	0	0	1351	0	0	0	0	0
	d__Bacteria;p__Proteobacteria;c__Gammaproteobacteria;o__Enterobacterales;f__Enterobacteriaceae;g__Klebsiella;s__Klebsiella_ornithinolytica	Klebsiella_ornithinolytica	5835	0	0	0	0	1748	0	0	1067	0	0	0	0	0	0	1186	0	0	0	0	0	0	0	0	0	0	0	0	9713	0	0	0	0	1651	0	0	0	0	0	0	0	0	0	0	0	0	0
	d__Bacteria;p__Bacteroidota;c__Bacteroidia;o__Bacteroidales;f__Rikenellaceae;g__Alistipes_A;s__Alistipes_A_indistinctus	Alistipes_A_indistinctus	0	0	0	0	0	0	0	0	0	0	0	0	0	0	0	0	0	135371	0	0	0	0	0	0	0	0	0	0	0	0	2002	0	0	0	0	0	0	0	0	0	0	0	3445	0	0	0	0
	d__Bacteria;p__Firmicutes;c__Bacilli;o__RF39;f__UBA660;g__CAG-302;s__CAG-302_sp001916775	CAG-302_sp001916775	0	0	0	0	0	0	0	0	0	0	0	0	0	40932	0	0	0	0	10050	0	16337	88197	0	0	0	0	0	0	0	0	0	0	0	0	0	0	0	0	0	0	0	0	0	0	0	0	0
	d__Bacteria;p__Actinobacteriota;c__Coriobacteriia;o__Coriobacteriales;f__Atopobiaceae;g__Paratractidigestivibacter;s__Paratractidigestivibacter_faecalis	Paratractidigestivibacter_faecalis	0	3536	0	0	0	234	0	0	214	119	0	0	31835	0	140	532	28948	5555	0	950	970	0	51535	23	0	0	0	0	23	0	0	0	0	0	0	0	0	4109	0	0	11626	0	3108	0	0	0	0
	d__Bacteria;p__Bacteroidota;c__Bacteroidia;o__Bacteroidales;f__Bacteroidaceae;g__Bacteroides;s__Bacteroides_neonati	Bacteroides_neonati	0	1174	0	0	0	0	0	2763	0	0	503	0	1606	186	1367	0	1569	453	62	1303	0	734	1017	3066	0	0	0	0	0	0	3392	0	0	124	15	2336	2378	2640	464	2446	0	2584	0	0	0	2556	1784
	d__Bacteria;p__Bacteroidota;c__Bacteroidia;o__Bacteroidales;f__Rikenellaceae;g__Alistipes;s__Alistipes_avistercoris	Alistipes_avistercoris	0	0	0	0	0	0	0	0	0	0	0	0	794	748	2243	0	0	0	401	10655	0	10775	0	0	0	0	0	0	0	0	0	0	0	0	0	0	0	7671	0	0	0	0	0	0	0	7462	24070
	d__Bacteria;p__Firmicutes_A;c__Clostridia;o__Lachnospirales;f__Lachnospiraceae;g__Blautia_A;s__Blautia_A_sp900066145	Blautia_A_sp900066145	0	0	0	0	0	0	0	0	0	0	536	0	0	938	110	0	0	0	0	113	0	413	176	0	0	0	0	0	0	1054	0	0	0	0	0	0	0	627	924	0	0	392	247	0	0	143	0
	d__Bacteria;p__Bacteroidota;c__Bacteroidia;o__Bacteroidales;f__Bacteroidaceae;g__Bacteroides;s__Bacteroides_massiliensis	Bacteroides_massiliensis	0	181	0	0	0	0	0	0	0	0	533	0	443	1510	922	0	0	467	0	4032	0	302	529	846	0	0	0	0	0	0	0	0	0	0	0	0	244	4946	445	806	0	0	0	0	0	1803	3996
	d__Bacteria;p__Bacteroidota;c__Bacteroidia;o__Bacteroidales;f__Rikenellaceae;g__Alistipes;s__Alistipes_sp910580175	Alistipes_sp910580175	0	0	0	0	0	0	0	0	0	0	0	0	716	541	2187	0	0	97	424	11079	0	6863	146	0	0	0	0	0	0	0	0	0	0	0	0	0	0	5973	0	0	0	0	0	0	0	7574	23871
	d__Bacteria;p__Actinobacteriota;c__Actinomycetia;o__Actinomycetales;f__Bifidobacteriaceae;g__Bifidobacterium;s__Bifidobacterium_minimum	Bifidobacterium_minimum	4115	3796	723	1986	8593	3358	5301	661	2882	7509	0	1675	1707	0	3453	5117	803	3018	0	0	1947	17	223	2013	0	3270	8067	4642	6393	1497	1836	1595	1312	0	3335	198	3841	288	809	558	6603	68	693	1912	906	1038	415
	d__Bacteria;p__Firmicutes;c__Bacilli;o__Lactobacillales;f__Enterococcaceae;g__Enterococcus_D;s__Enterococcus_D_casseliflavus	Enterococcus_D_casseliflavus	0	0	0	0	0	0	0	0	0	0	0	0	0	0	0	0	0	0	0	0	0	0	0	0	0	0	0	0	0	0	0	0	11088	0	0	0	0	0	0	0	0	0	0	0	0	0	0
	d__Bacteria;p__Proteobacteria;c__Alphaproteobacteria;o__RF32;f__CAG-239;g__Scatocola;s__Scatocola_faecipullorum	Scatocola_faecipullorum	0	0	0	0	0	0	0	0	0	0	0	0	0	0	0	0	0	0	0	0	0	0	0	0	0	0	0	0	0	0	0	0	0	0	0	0	0	0	0	0	0	0	0	0	0	0	0
	d__Bacteria;p__Firmicutes_A;c__Clostridia;o__Clostridiales;f__Clostridiaceae;g__Clostridium;s__Clostridium_saccharobutylicum	Clostridium_saccharobutylicum	0	0	0	0	0	0	0	0	0	0	0	0	0	0	0	0	0	0	0	0	0	0	0	0	38703	0	0	0	0	0	0	0	0	0	0	0	0	0	0	0	0	0	0	0	0	0	0
	d__Bacteria;p__Bacteroidota;c__Bacteroidia;o__Bacteroidales;f__Bacteroidaceae;g__Alloprevotella;s__Alloprevotella_sp900541575	Alloprevotella_sp900541575	0	0	0	0	0	0	0	0	0	0	0	0	0	0	0	0	0	364	0	0	0	0	0	0	0	0	0	0	0	0	0	0	0	0	0	0	0	0	0	0	0	0	138397	0	0	0	0
	d__Bacteria;p__Firmicutes_A;c__Clostridia;o__Lachnospirales;f__Lachnospiraceae;g__Anaerostipes;s__Anaerostipes_rhamnosivorans	Anaerostipes_rhamnosivorans	0	0	0	0	0	0	0	0	0	0	0	0	0	0	0	0	0	0	0	0	0	0	0	0	0	0	0	0	0	0	0	0	0	0	0	0	0	0	0	0	0	0	0	0	0	0	0
	d__Bacteria;p__Bacteroidota;c__Bacteroidia;o__Bacteroidales;f__Bacteroidaceae;g__Phocaeicola;s__Phocaeicola_gallinaceus	Phocaeicola_gallinaceus	0	268	0	0	0	0	0	0	0	0	833	0	631	0	1229	0	0	261	0	1940	0	867	523	1126	0	0	0	0	0	0	0	0	0	1674	0	0	131	7106	264	3318	0	659	0	0	0	1695	1708
	d__Bacteria;p__Actinobacteriota;c__Actinomycetia;o__Actinomycetales;f__Bifidobacteriaceae;g__Bifidobacterium;s__Bifidobacterium_felsineum	Bifidobacterium_felsineum	10203	1924	794	1893	5676	2943	1918	434	3184	8280	0	235	644	0	2736	4333	467	1793	0	0	990	0	0	3479	0	8173	2773	3809	3062	5006	836	896	519	0	2265	183	2507	0	0	267	5621	0	320	2292	1745	1490	350
	d__Bacteria;p__Bacteroidota;c__Bacteroidia;o__Bacteroidales;f__Bacteroidaceae;g__Bacteroides;s__Bacteroides_avicola	Bacteroides_avicola	0	285	0	0	0	0	0	405	0	0	926	0	730	870	1237	0	312	873	217	1961	0	884	668	1372	0	0	0	0	0	0	156	0	0	727	0	116	466	4820	469	1286	0	1739	12	0	0	2247	3166
	d__Bacteria;p__Firmicutes_A;c__Clostridia;o__Lachnospirales;f__Lachnospiraceae;g__Copromonas;s__Copromonas_sp000435795	Copromonas_sp000435795	0	0	0	0	0	0	0	0	0	0	0	0	0	0	0	246	0	0	0	0	0	0	0	0	0	0	0	0	0	0	0	0	0	0	0	2502	0	0	0	0	0	0	0	0	0	8897	0
	d__Bacteria;p__Firmicutes_C;c__Negativicutes;o__Veillonellales;f__Megasphaeraceae;g__Megasphaera;s__Megasphaera_sp001546855	Megasphaera_sp001546855	0	6486	0	117	0	0	0	0	1110	6083	0	0	4746	0	0	2240	1052	845	0	0	800	0	0	1695	0	0	0	3990	0	9760	1086	87	1031	0	0	932	27116	0	0	3013	19017	0	3817	11904	4310	233	0
	d__Bacteria;p__Firmicutes_C;c__Negativicutes;o__Veillonellales;f__Megasphaeraceae;g__Megasphaera;s__Megasphaera_massiliensis	Megasphaera_massiliensis	0	0	0	0	0	0	0	0	0	312	0	0	0	0	0	0	0	0	0	0	0	0	0	0	0	0	0	0	0	1589	0	0	0	0	0	0	127228	0	0	636	5604	0	0	309	310	0	0
	d__Bacteria;p__Firmicutes_A;c__Clostridia;o__Oscillospirales;f__Oscillospiraceae;g__CAG-83;s__CAG-83_sp003539495	CAG-83_sp003539495	0	0	0	0	0	0	0	0	0	0	0	0	0	26449	9862	0	0	0	576	0	96748	4213	0	0	0	0	0	0	0	0	0	0	0	0	0	0	0	0	0	0	0	62	0	0	0	0	0
	d__Bacteria;p__Proteobacteria;c__Gammaproteobacteria;o__Enterobacterales;f__Enterobacteriaceae;g__Enterobacter;s__Enterobacter_oligotrophicus	Enterobacter_oligotrophicus	0	0	0	0	0	0	0	0	0	0	0	0	0	0	0	0	0	0	0	0	0	0	0	0	434	0	0	0	11099	0	0	0	0	0	0	0	0	0	0	0	0	0	0	0	0	0	0
	d__Bacteria;p__Proteobacteria;c__Gammaproteobacteria;o__Enterobacterales;f__Enterobacteriaceae;g__Superficieibacter;s__Superficieibacter_sp001187865	Superficieibacter_sp001187865	1215	1368	518	0	738	366	1390	184	2486	410	0	345	584	0	0	1701	390	384	0	0	0	0	0	227	1918	0	1769	1743	3740	206	1829	1788	2636	3745	0	351	203	0	0	1442	0	0	0	2734	0	0	0
	d__Bacteria;p__Firmicutes_A;c__Clostridia;o__Clostridiales;f__Clostridiaceae;g__Clostridium;s__Clostridium_sp001916075	Clostridium_sp001916075	0	0	0	0	0	0	0	0	0	1704	0	0	0	0	0	0	0	0	0	0	0	939	19508	0	0	0	0	0	0	0	0	0	0	0	0	0	0	0	0	0	0	0	0	0	540	0	0
	d__Bacteria;p__Actinobacteriota;c__Actinomycetia;o__Actinomycetales;f__Bifidobacteriaceae;g__Bifidobacterium;s__Bifidobacterium_jacchi	Bifidobacterium_jacchi	1081	2769	121	2524	7971	4181	6179	134	2109	10116	0	2049	1472	0	3469	6384	638	2809	0	0	1069	0	188	2020	0	858	9457	4798	6793	796	2128	1544	1568	0	430	132	4213	0	445	591	4637	95	730	2367	1277	965	650
	d__Bacteria;p__Bacteroidota;c__Bacteroidia;o__Bacteroidales;f__Coprobacteraceae;g__Coprobacter;s__Coprobacter_secundus	Coprobacter_secundus	0	0	0	0	0	0	0	0	0	0	0	0	0	0	0	0	0	0	0	0	0	0	0	0	0	0	0	0	0	0	0	0	0	0	0	0	0	0	0	0	0	0	0	0	0	0	0
	d__Bacteria;p__Firmicutes_A;c__Clostridia;o__Lachnospirales;f__Lachnospiraceae;g__Butyribacter;s__Butyribacter_sp003149875	Butyribacter_sp003149875	0	0	0	0	0	0	0	0	0	0	0	0	0	0	0	0	0	0	0	0	0	0	0	0	0	0	0	0	0	0	0	0	0	0	0	0	0	0	0	0	0	0	0	0	0	0	0
	d__Bacteria;p__Bacteroidota;c__Bacteroidia;o__Bacteroidales;f__Rikenellaceae;g__Alistipes;s__Alistipes_sp910576555	Alistipes_sp910576555	0	0	0	0	0	0	0	0	0	0	0	0	700	289	2397	0	0	0	181	7308	0	8158	31	0	0	0	0	0	0	0	0	0	0	0	0	0	0	7123	0	0	0	0	0	0	0	8835	22967
	d__Bacteria;p__Firmicutes_A;c__Clostridia;o__Oscillospirales;f__Oscillospiraceae;g__CAG-170;s__CAG-170_sp000436735	CAG-170_sp000436735	0	0	0	0	0	0	0	0	0	0	0	0	0	19501	0	0	2787	0	0	0	2538	109474	0	0	0	0	0	0	0	0	0	0	0	0	0	0	0	0	0	0	0	0	0	0	0	0	0
	d__Bacteria;p__Firmicutes_A;c__Clostridia;o__TANB77;f__CAG-508;g__CAG-269;s__CAG-269_sp003525075	CAG-269_sp003525075	0	0	0	0	0	0	0	0	0	0	0	0	0	466	0	0	0	0	0	31497	0	48351	0	0	0	0	0	0	0	0	0	0	0	0	0	0	0	0	0	0	0	0	0	0	0	0	0
	d__Bacteria;p__Proteobacteria;c__Gammaproteobacteria;o__Enterobacterales;f__Enterobacteriaceae;g__Enterobacter_D;s__Enterobacter_D_sp900116015	Enterobacter_D_sp900116015	4396	532	27	0	221	923	55	0	2013	55	0	0	138	0	0	1396	27	0	0	0	0	0	0	27	1574	0	333	110	8573	0	641	333	637	2249	0	0	0	0	0	253	0	0	0	196	0	82	0
	d__Bacteria;p__Actinobacteriota;c__Actinomycetia;o__Actinomycetales;f__Bifidobacteriaceae;g__Bifidobacterium;s__Bifidobacterium_tsurumiense	Bifidobacterium_tsurumiense	4086	3977	1054	1295	4291	2423	2329	505	2531	4510	0	219	1710	0	3475	3184	572	3588	0	14	3345	29	86	1804	0	3534	4276	3455	3610	2596	1366	1115	586	0	1298	171	3121	891	697	184	10712	0	416	1459	776	903	410
	d__Bacteria;p__Firmicutes_A;c__Clostridia;o__Lachnospirales;f__Lachnospiraceae;g__Copromonas;s__Copromonas_sp900066055	Copromonas_sp900066055	0	2354	0	0	0	0	0	0	0	0	5208	0	398	7281	0	8564	672	0	138	337	561	0	3708	1315	0	0	0	0	0	0	0	0	0	0	0	32852	2556	5361	0	0	0	10665	0	1498	0	5828	105
	d__Bacteria;p__Firmicutes;c__Bacilli;o__Erysipelotrichales;f__Coprobacillaceae;g__Erysipelatoclostridium;s__Erysipelatoclostridium_sp000508865	Erysipelatoclostridium_sp000508865	0	0	0	0	0	0	0	0	0	0	0	0	0	0	0	0	0	0	0	0	0	0	0	0	0	0	0	0	0	0	0	0	0	0	0	0	0	0	3753	0	0	0	0	0	0	1575	8342
	d__Bacteria;p__Proteobacteria;c__Gammaproteobacteria;o__Enterobacterales;f__Enterobacteriaceae;g__Enterobacter;s__Enterobacter_cloacae_M	Enterobacter_cloacae_M	0	0	0	0	0	0	0	0	0	0	0	0	0	0	0	0	0	0	0	0	0	0	0	0	0	0	0	0	0	0	0	0	0	0	0	0	0	0	0	0	0	0	0	0	0	0	0
	d__Bacteria;p__Firmicutes;c__Bacilli;o__Lactobacillales;f__Enterococcaceae;g__Enterococcus_A;s__Enterococcus_A_malodoratus	Enterococcus_A_malodoratus	0	0	0	0	2434	0	0	0	1186	1326	0	0	0	0	0	663	0	0	0	0	0	0	0	4734	0	0	0	0	8264	0	1471	82	0	0	0	0	544	0	0	0	0	0	0	0	0	0	0
	d__Bacteria;p__Firmicutes;c__Bacilli;o__Erysipelotrichales;f__Coprobacillaceae;g__Erysipelatoclostridium;s__Erysipelatoclostridium_spiroforme	Erysipelatoclostridium_spiroforme	0	0	0	0	0	0	0	0	0	0	0	0	0	0	0	0	0	0	0	0	0	0	0	0	0	0	0	0	0	0	0	0	0	0	0	0	0	0	0	0	0	0	0	0	0	0	0
	d__Bacteria;p__Firmicutes_C;c__Negativicutes;o__Veillonellales;f__Megasphaeraceae;g__Caecibacter;s__Caecibacter_hominis	Caecibacter_hominis	0	9313	0	3395	0	0	0	0	1297	7896	0	0	6606	0	1847	5060	2189	902	0	0	686	0	0	3400	0	0	0	4527	0	19336	3670	0	781	0	0	803	2457	0	0	8235	13825	0	4417	17056	7655	264	0
	d__Bacteria;p__Actinobacteriota;c__Coriobacteriia;o__Coriobacteriales;f__Atopobiaceae;g__Lancefieldella;s__Lancefieldella_sp000564995	Lancefieldella_sp000564995	3273	109	80726	0	822	0	706	0	0	0	0	110	0	0	0	0	0	0	0	0	0	0	0	0	729	6174	18903	253	1831	0	0	733	102	0	0	0	0	0	0	0	0	0	0	3827	918	0	0
	d__Bacteria;p__Firmicutes_C;c__Negativicutes;o__Selenomonadales;f__Selenomonadaceae;g__Mitsuokella;s__Mitsuokella_jalaludinii	Mitsuokella_jalaludinii	0	0	0	0	0	0	0	0	0	0	0	0	0	0	1308	0	23612	2891	0	0	7117	0	0	0	0	0	0	0	0	0	0	0	0	0	0	0	0	0	170	391	45481	0	2386	0	0	0	0
	d__Bacteria;p__Firmicutes_A;c__Clostridia;o__Lachnospirales;f__Lachnospiraceae;g__Lachnospira;s__Lachnospira_sp900547255	Lachnospira_sp900547255	0	0	0	0	0	0	0	0	0	0	0	0	0	829	0	0	0	0	0	498	0	0	1985	0	0	0	0	0	0	0	0	0	0	0	0	13253	0	0	478	0	0	1666	0	0	0	0	0
	d__Bacteria;p__Bacteroidota;c__Bacteroidia;o__Bacteroidales;f__Tannerellaceae;g__Parabacteroides;s__Parabacteroides_bouchesdurhonensis	Parabacteroides_bouchesdurhonensis	0	682	0	0	0	0	0	0	0	0	158	0	645	247	537	0	0	213	24	1577	0	2835	649	12	0	0	0	0	0	0	0	0	0	12551	0	0	0	1350	37	202	0	1700	0	0	0	101	50
	d__Bacteria;p__Firmicutes_A;c__Clostridia;o__Lachnospirales;f__Lachnospiraceae;g__Ventrimonas;s__Ventrimonas_sp003478505	Ventrimonas_sp003478505	0	0	0	0	0	0	0	0	0	0	0	0	0	1429	0	0	0	0	0	0	0	0	0	0	0	0	0	0	0	0	0	0	0	0	0	0	0	902	0	0	0	5074	0	0	0	0	0
	d__Bacteria;p__Bacteroidota;c__Bacteroidia;o__Bacteroidales;f__Rikenellaceae;g__Alistipes;s__Alistipes_cottocaccae	Alistipes_cottocaccae	0	0	0	0	0	0	0	0	0	0	0	0	631	1816	2052	0	0	0	500	7101	0	10452	63	0	0	0	0	0	0	0	0	0	0	0	0	0	0	7188	107	0	0	0	0	0	0	7657	25544
	d__Bacteria;p__Actinobacteriota;c__Actinomycetia;o__Actinomycetales;f__Bifidobacteriaceae;g__Bifidobacterium;s__Bifidobacterium_bohemicum	Bifidobacterium_bohemicum	4901	3002	1117	1880	7648	2908	4065	979	2832	6353	0	800	1041	0	2152	3829	564	2412	0	0	1268	32	40	1955	0	2888	6206	4480	5147	2296	1687	1448	995	0	3853	186	3745	250	360	333	5496	0	550	1555	972	676	511
	d__Bacteria;p__Firmicutes_A;c__Clostridia;o__Lachnospirales;f__Lachnospiraceae;g__Anaerostipes;s__Anaerostipes_sp000508985	Anaerostipes_sp000508985	0	0	0	0	0	0	0	0	0	0	0	0	0	0	0	0	0	0	0	0	0	0	0	0	0	0	0	0	0	0	0	0	0	0	0	0	0	0	0	0	0	0	0	0	0	0	0
	d__Bacteria;p__Bacteroidota;c__Bacteroidia;o__Bacteroidales;f__Rikenellaceae;g__Alistipes;s__Alistipes_communis	Alistipes_communis	0	0	0	0	0	0	0	0	0	0	0	0	649	204	1461	0	0	313	0	6999	0	5517	178	0	0	0	0	0	0	0	0	0	0	0	0	0	0	2124	0	0	0	0	0	0	0	7352	28054
	d__Bacteria;p__Bacteroidota;c__Bacteroidia;o__Bacteroidales;f__Bacteroidaceae;g__Bacteroides;s__Bacteroides_intestinalis_A	Bacteroides_intestinalis_A	0	0	0	0	0	0	0	0	0	0	2121	0	0	0	0	0	0	0	0	0	0	2626	251	0	0	0	0	0	0	0	0	0	0	0	0	0	0	0	4346	0	0	0	0	0	0	0	0
	d__Bacteria;p__Firmicutes_A;c__Clostridia;o__Oscillospirales;f__Ruminococcaceae;g__Gemmiger;s__Gemmiger_qucibialis	Gemmiger_qucibialis	0	0	0	0	0	0	0	0	0	0	0	0	604	7211	0	0	0	496	483	2377	140	6967	3828	0	0	0	0	0	0	0	0	0	0	0	0	0	0	13753	5359	0	0	9751	0	0	0	659	426
	d__Bacteria;p__Firmicutes_A;c__Clostridia;o__Lachnospirales;f__Lachnospiraceae;g__Enterocloster;s__Enterocloster_sp000431375	Enterocloster_sp000431375	0	2648	0	0	0	0	0	1343	0	924	45	2362	3053	0	0	1930	0	870	0	0	0	0	3238	1045	0	0	0	0	0	13172	1763	0	0	0	0	9408	0	769	1729	0	3265	0	0	0	0	5664	0
	d__Bacteria;p__Proteobacteria;c__Gammaproteobacteria;o__Enterobacterales;f__Enterobacteriaceae;g__Citrobacter_A;s__Citrobacter_A_rodentium	Citrobacter_A_rodentium	0	1181	889	0	1015	0	798	81	3794	382	0	433	661	0	0	1520	678	247	0	0	0	0	0	444	2243	0	1491	1113	1758	190	2327	1902	2499	5118	0	273	135	0	0	1506	0	0	0	2011	0	0	0
	d__Bacteria;p__Firmicutes;c__Bacilli;o__Lactobacillales;f__Lactobacillaceae;g__Limosilactobacillus;s__Limosilactobacillus_urinaemulieris	Limosilactobacillus_urinaemulieris	0	0	0	0	0	10339	0	0	0	0	0	26268	0	0	0	0	0	0	0	0	0	0	0	0	0	0	0	0	0	0	0	46875	0	0	748	0	0	0	0	0	0	0	0	0	36949	0	0
	d__Bacteria;p__Firmicutes_A;c__Clostridia;o__Oscillospirales;f__Ruminococcaceae;g__Angelakisella;s__Angelakisella_sp900547385	Angelakisella_sp900547385	0	0	0	0	0	0	0	0	0	0	7237	0	0	0	0	0	71206	0	0	0	0	0	0	0	0	0	0	0	0	0	0	0	0	0	0	0	0	42589	0	0	0	0	0	0	0	0	0
	d__Bacteria;p__Firmicutes_A;c__Clostridia;o__Lachnospirales;f__Lachnospiraceae;g__Eubacterium_F;s__Eubacterium_F_sp900539115	Eubacterium_F_sp900539115	0	0	0	0	0	0	0	0	0	0	0	0	0	15224	0	0	0	0	0	0	0	203	0	0	0	0	0	0	0	0	0	0	0	0	0	0	0	0	0	0	0	2466	0	0	0	0	0
	d__Bacteria;p__Bacteroidota;c__Bacteroidia;o__Bacteroidales;f__Bacteroidaceae;g__Phocaeicola;s__Phocaeicola_sp000434735	Phocaeicola_sp000434735	0	0	0	0	0	0	0	0	0	0	203	4402	161	79	13085	0	0	0	0	759	16047	241	0	207	0	0	0	0	0	0	0	0	0	0	0	0	0	3892	0	486	0	0	9328	0	0	155	119
	d__Bacteria;p__Bacteroidota;c__Bacteroidia;o__Bacteroidales;f__UBA932;g__Cryptobacteroides;s__Cryptobacteroides_sp900544195	Cryptobacteroides_sp900544195	0	0	0	0	0	0	0	0	0	0	2976	0	0	34562	0	0	0	0	0	0	71323	0	306	0	0	0	0	0	0	0	0	0	0	0	0	0	0	0	0	0	0	0	0	0	0	0	0
	d__Bacteria;p__Actinobacteriota;c__Actinomycetia;o__Actinomycetales;f__Bifidobacteriaceae;g__Bifidobacterium;s__Bifidobacterium_gallicum	Bifidobacterium_gallicum	4993	2591	1314	1348	4653	2311	2615	846	2437	4360	0	278	1118	0	1944	2890	309	2350	0	58	2200	8	116	1442	0	3287	4497	3828	3458	2218	1153	1017	633	0	2559	238	2332	810	499	269	5819	0	406	1206	1186	731	346
	d__Bacteria;p__Bacteroidota;c__Bacteroidia;o__Bacteroidales;f__Tannerellaceae;g__Parabacteroides;s__Parabacteroides_intestinipullorum	Parabacteroides_intestinipullorum	0	640	0	0	0	0	0	0	0	0	33	0	384	100	462	0	0	65	0	1162	0	2078	514	0	0	0	0	0	0	0	0	0	0	19151	0	0	0	1410	0	0	0	0	0	0	0	0	0
	d__Bacteria;p__Actinobacteriota;c__Actinomycetia;o__Actinomycetales;f__Micrococcaceae;g__Rothia;s__Rothia_mucilaginosa	Rothia_mucilaginosa	23808	769	62343	0	3057	0	1328	0	0	0	0	239	0	0	0	0	0	0	0	0	0	0	0	0	2001	3971	12869	382	0	0	0	726	321	0	0	0	0	0	0	0	518	0	0	2845	0	0	0
	d__Bacteria;p__Proteobacteria;c__Gammaproteobacteria;o__Enterobacterales;f__Enterobacteriaceae;g__Enterobacter;s__Enterobacter_wuhouensis	Enterobacter_wuhouensis	0	0	0	0	0	0	0	0	0	0	0	0	0	0	0	0	0	0	0	0	0	0	0	0	0	0	0	0	3608	0	0	0	0	0	0	0	0	0	0	0	0	0	0	0	0	0	0
	d__Bacteria;p__Firmicutes_A;c__Clostridia;o__Lachnospirales;f__Lachnospiraceae;g__Enterocloster;s__Enterocloster_asparagiformis	Enterocloster_asparagiformis	0	0	0	0	0	0	0	0	0	0	0	0	0	0	1953	0	0	0	0	0	0	0	0	0	0	0	0	0	0	0	0	0	0	0	0	0	0	0	0	0	0	0	0	0	0	0	0
	d__Bacteria;p__Bacteroidota;c__Bacteroidia;o__Bacteroidales;f__Tannerellaceae;g__Parabacteroides;s__Parabacteroides_faecis	Parabacteroides_faecis	0	57	0	0	0	0	0	0	0	0	613	0	0	0	0	0	0	0	0	0	0	15455	0	0	0	0	0	0	0	0	0	0	0	0	0	0	0	0	1595	0	0	30229	0	0	0	0	0
	d__Bacteria;p__Actinobacteriota;c__Actinomycetia;o__Actinomycetales;f__Bifidobacteriaceae;g__Bifidobacterium;s__Bifidobacterium_aemilianum	Bifidobacterium_aemilianum	4251	2537	922	1377	4908	2604	3113	772	2319	5144	0	582	736	0	1910	3642	491	1691	0	0	1138	0	0	1774	0	4228	4406	3193	3535	1866	1149	1194	756	0	2861	79	2937	101	225	262	5067	0	323	1293	875	770	427
	d__Bacteria;p__Proteobacteria;c__Gammaproteobacteria;o__Burkholderiales;f__Burkholderiaceae;g__Mesosutterella;s__Mesosutterella_sp902797695	Mesosutterella_sp902797695	0	0	0	88	0	0	0	1517	6530	3884	0	3631	0	0	0	19390	0	0	0	0	0	0	0	7082	0	0	0	0	0	0	8514	8154	5460	0	0	0	0	0	325	0	1166	0	0	161	36702	0	0
	d__Bacteria;p__Actinobacteriota;c__Actinomycetia;o__Actinomycetales;f__Bifidobacteriaceae;g__Bifidobacterium;s__Bifidobacterium_sp012932445	Bifidobacterium_sp012932445	3973	1322	1078	1230	3284	2258	2194	726	2200	6348	0	344	695	0	1821	3222	297	1825	0	0	1167	65	0	1823	0	3435	4303	4141	3581	2286	784	1038	784	0	2388	189	2492	55	77	246	4393	11	463	1322	856	701	443
	d__Bacteria;p__Actinobacteriota;c__Actinomycetia;o__Actinomycetales;f__Bifidobacteriaceae;g__Bifidobacterium;s__Bifidobacterium_goeldii	Bifidobacterium_goeldii	2243	2274	240	1604	3387	2356	4164	103	1665	6352	0	904	1420	0	2924	4258	545	2486	0	0	1665	0	72	1820	0	2546	5439	3513	3591	1062	1230	837	996	0	302	124	2674	394	539	269	5139	51	520	1888	1011	594	481
	d__Bacteria;p__Firmicutes_A;c__Clostridia;o__TANB77;f__CAG-508;g__CAG-245;s__CAG-245_sp000435175	CAG-245_sp000435175	0	0	0	0	0	0	0	0	0	0	0	0	0	0	0	0	0	0	22105	0	0	38561	0	0	0	0	0	0	0	0	0	0	0	0	0	0	0	2713	0	0	0	0	0	0	0	0	0
	d__Bacteria;p__Firmicutes;c__Bacilli;o__Lactobacillales;f__Streptococcaceae;g__Streptococcus;s__Streptococcus_mitis_BB	Streptococcus_mitis_BB	9052	345	92690	0	2448	0	420	0	0	0	0	0	0	0	0	519	0	0	0	0	0	0	0	0	0	245	4892	0	0	759	0	579	135	0	0	0	0	0	0	0	602	0	0	0	0	0	0
	d__Bacteria;p__Firmicutes;c__Bacilli;o__Erysipelotrichales;f__Coprobacillaceae;g__Faecalibacillus;s__Faecalibacillus_faecis	Faecalibacillus_faecis	0	0	0	0	0	0	0	0	0	0	0	0	0	434	866	0	0	0	406	0	0	0	0	0	0	0	0	0	0	0	0	0	0	0	0	0	0	0	364	0	0	0	0	0	0	0	0
	d__Bacteria;p__Firmicutes_A;c__Clostridia;o__Peptostreptococcales;f__Peptostreptococcaceae;g__Intestinibacter;s__Intestinibacter_sp900540355	Intestinibacter_sp900540355	0	0	0	0	0	0	0	0	0	0	0	0	0	0	0	90	0	0	0	0	0	218	0	0	0	0	0	0	0	0	0	0	0	0	0	0	0	0	0	0	0	0	0	0	0	1440	0
	d__Bacteria;p__Firmicutes_A;c__Clostridia;o__Lachnospirales;f__Lachnospiraceae;g__Oliverpabstia;s__Oliverpabstia_intestinalis	Oliverpabstia_intestinalis	0	0	0	0	0	0	0	0	0	0	1514	0	0	1739	0	0	0	0	33	0	0	0	0	0	0	0	0	0	0	0	0	0	0	0	0	0	0	7372	161	0	0	6038	0	0	0	0	0
	d__Bacteria;p__Proteobacteria;c__Gammaproteobacteria;o__Enterobacterales;f__Enterobacteriaceae;g__Franconibacter;s__Franconibacter_helveticus	Franconibacter_helveticus	5330	0	0	0	0	902	0	0	1026	0	0	0	0	0	0	808	0	0	0	0	0	0	0	0	312	0	90	0	8845	0	0	267	268	1643	0	0	0	0	0	0	0	0	0	0	0	0	0
	d__Bacteria;p__Firmicutes_A;c__Clostridia;o__Lachnospirales;f__Lachnospiraceae;g__Coprococcus_A;s__Coprococcus_A_catus	Coprococcus_A_catus	0	0	0	0	0	0	0	0	0	0	0	0	0	1825	0	0	0	0	3559	488	0	0	13914	0	0	0	0	0	0	0	0	0	0	0	0	0	0	16175	7033	0	0	4670	0	0	0	0	0
	d__Bacteria;p__Firmicutes_A;c__Clostridia;o__Clostridiales;f__Clostridiaceae;g__Clostridium;s__Clostridium_baratii	Clostridium_baratii	69	0	0	0	0	292	0	0	0	0	0	0	0	0	0	0	0	0	0	0	0	0	0	0	27117	0	0	0	0	0	0	0	0	0	0	0	0	0	0	0	0	0	0	0	0	0	0
	d__Bacteria;p__Actinobacteriota;c__Coriobacteriia;o__Coriobacteriales;f__Eggerthellaceae;g__Senegalimassilia;s__Senegalimassilia_anaerobia	Senegalimassilia_anaerobia	0	18189	0	0	0	0	0	0	0	0	0	0	7918	0	22338	0	0	2544	0	0	790	3645	528	0	0	0	0	0	0	0	10301	0	0	0	0	7674	0	3766	0	0	22338	0	9198	0	0	0	0
	d__Bacteria;p__Firmicutes_A;c__Clostridia;o__Oscillospirales;f__Oscillospiraceae;g__CAG-103;s__CAG-103_sp900757655	CAG-103_sp900757655	0	0	0	0	0	0	0	0	0	0	65701	0	0	10303	2058	0	0	0	0	0	0	0	0	0	0	0	0	0	0	0	0	0	0	0	0	0	0	0	0	0	0	30911	0	0	0	0	568
	d__Bacteria;p__Firmicutes;c__Bacilli;o__Lactobacillales;f__Streptococcaceae;g__Streptococcus;s__Streptococcus_peroris	Streptococcus_peroris	20727	1874	5049	0	5968	0	6079	2624	0	0	0	2156	0	0	0	384	0	0	0	0	0	0	0	0	0	0	45536	76	643	651	0	2293	3113	0	0	1300	0	0	0	0	8289	0	0	1947	26	0	0
	d__Bacteria;p__Firmicutes;c__Bacilli;o__Lactobacillales;f__Streptococcaceae;g__Streptococcus;s__Streptococcus_mitis	Streptococcus_mitis	49033	1079	994	0	9390	281	1888	1122	0	0	0	1069	0	0	0	0	0	0	0	0	0	0	0	0	0	0	26276	772	1212	718	0	3539	1730	1314	0	716	0	0	0	0	5587	0	0	0	0	0	0
	d__Bacteria;p__Firmicutes_A;c__Clostridia;o__Lachnospirales;f__Lachnospiraceae;g__Clostridium_Q;s__Clostridium_Q_transplantifaecale	Clostridium_Q_transplantifaecale	0	0	0	0	0	0	0	0	0	0	0	0	311	0	0	0	0	0	0	0	0	0	0	0	108	0	0	0	0	0	0	0	0	0	0	291	0	0	0	0	0	2453	0	0	0	638	165
	d__Bacteria;p__Bacteroidota;c__Bacteroidia;o__Bacteroidales;f__UBA932;g__Cryptobacteroides;s__Cryptobacteroides_sp000431015	Cryptobacteroides_sp000431015	0	0	0	0	0	0	0	0	0	0	9453	0	0	76837	0	0	0	0	0	0	19229	0	1884	0	0	0	0	0	0	0	0	0	0	0	0	0	0	0	0	0	0	0	0	0	0	0	0
	d__Bacteria;p__Proteobacteria;c__Gammaproteobacteria;o__Enterobacterales;f__Enterobacteriaceae;g__Morganella;s__Morganella_morganii	Morganella_morganii	0	0	0	0	0	0	0	0	0	0	0	0	0	0	0	0	0	0	0	0	0	0	0	0	0	0	0	0	0	0	0	0	0	0	0	0	0	0	0	0	0	0	0	0	0	0	0
	d__Bacteria;p__Actinobacteriota;c__Actinomycetia;o__Actinomycetales;f__Bifidobacteriaceae;g__Bifidobacterium;s__Bifidobacterium_angulatum	Bifidobacterium_angulatum	1609	3451	157	1244	2429	1798	1977	0	2131	4941	0	548	1587	0	3865	3079	776	3673	0	0	1910	4149	0	1369	0	773	3260	1951	1958	1195	726	367	418	0	436	157	1595	341	489	177	10686	0	789	1450	712	518	590
	d__Bacteria;p__Firmicutes_A;c__Clostridia;o__Lachnospirales;f__Lachnospiraceae;g__Clostridium_AP;s__Clostridium_AP_sp000509125	Clostridium_AP_sp000509125	0	0	0	0	0	0	0	0	0	0	0	0	0	0	0	0	0	0	0	0	0	0	560	0	0	0	0	0	0	0	0	0	0	0	0	0	0	0	0	0	0	0	0	0	0	2992	15959
	d__Bacteria;p__Bacteroidota;c__Bacteroidia;o__Bacteroidales;f__Marinifilaceae;g__Butyricimonas;s__Butyricimonas_faecalis	Butyricimonas_faecalis	0	0	0	0	0	0	0	0	0	0	0	0	0	0	0	0	0	52736	0	0	0	6109	0	0	0	0	0	0	0	0	0	0	0	0	0	0	0	0	0	0	0	0	0	0	0	0	0
	d__Bacteria;p__Firmicutes;c__Bacilli;o__Lactobacillales;f__Streptococcaceae;g__Streptococcus;s__Streptococcus_parasanguinis_B	Streptococcus_parasanguinis_B	5578	5513	20037	0	1292	0	6136	0	752	0	0	2903	397	1561	0	3621	0	0	0	0	0	4330	497	0	0	94	7206	901	0	274	0	1388	376	0	0	0	0	0	0	0	1314	0	0	8353	574	0	0
	d__Bacteria;p__Bacteroidota;c__Bacteroidia;o__Bacteroidales;f__Rikenellaceae;g__Alistipes;s__Alistipes_megaguti	Alistipes_megaguti	0	0	0	0	0	0	0	0	0	0	0	0	833	1087	653	0	0	0	92	3564	0	13954	0	0	0	0	0	0	0	0	0	0	0	0	0	0	0	8587	0	0	0	0	0	0	0	6255	19805
	d__Bacteria;p__Bacteroidota;c__Bacteroidia;o__Bacteroidales;f__Bacteroidaceae;g__Bacteroides;s__Bacteroides_sp007896885	Bacteroides_sp007896885	0	520	0	0	0	0	0	144	0	0	662	0	793	322	777	0	120	191	167	2169	0	1178	1068	3295	0	0	0	0	0	0	12	0	0	119	0	0	419	1761	626	2419	0	156	0	0	0	1063	891
	d__Bacteria;p__Bacteroidota;c__Bacteroidia;o__Bacteroidales;f__Coprobacteraceae;g__Coprobacter;s__Coprobacter_fastidiosus	Coprobacter_fastidiosus	0	0	0	0	0	0	0	0	0	0	0	0	0	0	0	0	0	0	0	0	0	0	0	0	0	0	0	0	0	0	0	0	0	0	0	0	0	0	0	0	0	0	0	0	0	0	0
	d__Bacteria;p__Bacteroidota;c__Bacteroidia;o__Bacteroidales;f__Tannerellaceae;g__Parabacteroides;s__Parabacteroides_sp003480915	Parabacteroides_sp003480915	0	0	0	0	0	0	0	0	0	0	0	0	0	0	0	0	0	0	0	0	0	12795	0	0	0	0	0	0	0	0	0	0	0	0	0	0	0	0	473	0	0	29550	0	0	0	0	0
	d__Bacteria;p__Proteobacteria;c__Gammaproteobacteria;o__Enterobacterales;f__Enterobacteriaceae;g__Siccibacter;s__Siccibacter_turicensis	Siccibacter_turicensis	3229	0	0	0	0	1057	0	0	981	0	0	0	0	0	0	1006	0	0	0	0	0	0	0	0	203	0	0	0	7699	0	0	0	29	1147	0	0	0	0	0	0	0	0	0	0	0	0	0
	d__Bacteria;p__Firmicutes_A;c__Clostridia;o__Clostridiales;f__Clostridiaceae;g__Clostridium;s__Clostridium_sp012843905	Clostridium_sp012843905	0	0	0	0	0	0	0	0	97	0	0	0	0	0	0	0	0	0	0	0	0	0	0	0	29736	0	0	0	0	0	0	0	0	0	0	0	0	0	0	0	0	0	0	0	0	0	0
	d__Bacteria;p__Firmicutes_A;c__Clostridia;o__Clostridiales;f__Clostridiaceae;g__Clostridium;s__Clostridium_thermobutyricum	Clostridium_thermobutyricum	848	0	0	0	0	1349	0	0	0	0	0	0	0	0	0	0	0	0	0	0	0	0	348	0	39990	0	0	0	0	0	0	0	0	0	0	0	0	0	0	0	0	0	0	0	0	0	0
	d__Bacteria;p__Firmicutes_A;c__Clostridia;o__Lachnospirales;f__Lachnospiraceae;g__Ventrimonas;s__Ventrimonas_sp003480315	Ventrimonas_sp003480315	0	0	0	0	0	0	0	0	0	0	0	0	0	1521	0	0	0	0	139	0	0	0	2613	0	0	0	0	0	0	0	0	0	0	0	0	0	0	774	829	0	0	4824	0	0	0	0	0
	d__Bacteria;p__Firmicutes;c__Bacilli;o__Erysipelotrichales;f__Erysipelotrichaceae;g__Holdemanella;s__Holdemanella_sp003458715	Holdemanella_sp003458715	0	0	0	0	0	0	0	0	0	0	7824	0	0	7273	0	0	0	29	0	6811	2701	7670	19472	0	0	0	0	0	0	0	0	0	0	0	0	0	0	6222	0	0	2582	0	1727	21859	4368	0	0
	d__Bacteria;p__Bacteroidota;c__Bacteroidia;o__Bacteroidales;f__Bacteroidaceae;g__Phocaeicola;s__Phocaeicola_salanitronis	Phocaeicola_salanitronis	0	99	0	0	0	0	0	0	0	0	428	0	762	25	1118	0	0	149	0	1258	0	873	280	798	0	0	0	0	0	0	0	0	0	2258	0	0	25	3038	250	1755	0	769	0	0	0	1770	1777
	d__Bacteria;p__Bacteroidota;c__Bacteroidia;o__Bacteroidales;f__Bacteroidaceae;g__Phocaeicola_A;s__unknown	unknown	0	110	0	0	0	0	0	0	0	0	313	0	544	0	591	0	0	196	0	1137	0	561	0	1123	0	0	0	0	0	0	0	0	0	554	0	0	0	2271	189	2294	0	279	0	0	0	1141	2045
	d__Bacteria;p__Proteobacteria;c__Gammaproteobacteria;o__Enterobacterales;f__Enterobacteriaceae;g__Shimwellia;s__Shimwellia_pseudoproteus	Shimwellia_pseudoproteus	3017	201	146	0	534	965	291	0	1687	165	0	0	166	0	0	999	0	0	0	0	0	0	0	0	1396	0	221	184	4913	0	366	421	404	1701	0	0	0	0	0	92	0	0	0	331	0	0	0
	d__Bacteria;p__Firmicutes_A;c__Clostridia;o__Oscillospirales;f__Acutalibacteraceae;g__CAG-217;s__CAG-217_sp000436335	CAG-217_sp000436335	0	0	0	0	0	0	0	0	0	0	0	0	0	0	0	0	0	0	0	0	0	1308	0	0	0	0	0	0	0	0	0	0	0	0	0	0	0	3098	0	0	0	0	0	0	0	0	4369
	d__Bacteria;p__Proteobacteria;c__Gammaproteobacteria;o__Enterobacterales;f__Enterobacteriaceae;g__Citrobacter;s__Citrobacter_portucalensis	Citrobacter_portucalensis	0	0	0	0	0	0	0	0	500	0	0	0	0	0	0	0	0	0	0	0	0	0	0	0	0	0	0	0	1645	0	0	0	0	0	0	0	0	0	0	0	0	0	0	0	0	0	0
	d__Bacteria;p__Firmicutes_A;c__Clostridia;o__Oscillospirales;f__Ruminococcaceae;g__Faecalibacterium;s__Faecalibacterium_avium	Faecalibacterium_avium	0	3731	0	0	0	0	0	0	0	0	4846	0	1854	2449	0	6242	0	1122	752	986	1069	4700	8114	612	0	0	0	0	0	0	0	0	0	0	0	457	652	4382	1235	0	0	2285	0	946	12504	4065	575
	d__Bacteria;p__Firmicutes_A;c__Clostridia;o__TANB77;f__CAG-508;g__CAG-269;s__CAG-269_sp900553985	CAG-269_sp900553985	0	0	0	0	0	0	0	0	0	0	0	0	0	0	0	0	0	0	0	0	0	522	0	0	0	0	0	0	0	0	0	0	0	0	0	0	0	0	0	0	0	299	0	0	0	0	0
	d__Bacteria;p__Firmicutes_A;c__Clostridia;o__Oscillospirales;f__Oscillospiraceae;g__CAG-103;s__CAG-103_sp900543625	CAG-103_sp900543625	0	0	0	0	0	0	0	0	0	0	11344	0	0	16747	5179	0	0	0	472	0	0	1239	0	0	0	0	0	0	0	0	0	0	0	0	0	0	0	0	0	0	0	62255	0	0	0	0	0
	d__Bacteria;p__Bacteroidota;c__Bacteroidia;o__Bacteroidales;f__Rikenellaceae;g__Alistipes;s__Alistipes_faecigallinarum	Alistipes_faecigallinarum	0	0	0	0	0	0	0	0	0	0	0	0	566	947	840	0	0	0	68	5431	0	6850	132	0	0	0	0	0	0	0	0	0	0	0	0	0	0	4947	0	0	0	0	0	0	0	7229	21212
	d__Bacteria;p__Actinobacteriota;c__Actinomycetia;o__Actinomycetales;f__Bifidobacteriaceae;g__Bifidobacterium;s__Bifidobacterium_animalis	Bifidobacterium_animalis	0	0	0	2922	0	0	0	0	5191	0	0	0	0	0	0	0	0	0	0	0	0	0	0	0	0	0	0	0	0	0	0	0	0	0	0	0	0	0	0	0	0	0	0	0	0	95	0
	d__Bacteria;p__Bacteroidota;c__Bacteroidia;o__Bacteroidales;f__Rikenellaceae;g__Alistipes;s__Alistipes_sp910586375	Alistipes_sp910586375	0	0	0	0	0	0	0	0	0	0	0	0	328	192	1008	0	0	0	223	5959	0	3507	18	0	0	0	0	0	0	0	0	0	0	0	0	0	0	4616	0	0	0	0	0	0	0	5790	18736
	d__Bacteria;p__Firmicutes;c__Bacilli;o__Lactobacillales;f__Streptococcaceae;g__Streptococcus;s__Streptococcus_sp000314795	Streptococcus_sp000314795	4984	905	55099	0	1980	0	12127	0	0	0	0	2469	0	0	0	763	0	0	0	0	0	0	0	0	0	0	5684	775	0	0	0	247	499	0	0	0	0	0	0	0	0	0	0	4248	250	0	0
	d__Bacteria;p__Patescibacteria;c__Saccharimonadia;o__Saccharimonadales;f__Nanogingivalaceae;g__Nanogingivalis;s__Nanogingivalis_sp015257795	Nanogingivalis_sp015257795	380	614	0	0	15773	0	7350	0	0	0	0	0	0	0	0	124	0	0	0	0	0	0	0	0	0	0	68484	0	0	0	0	0	2058	0	0	47	1014	0	0	0	0	0	0	0	0	0	0
	d__Bacteria;p__Bacteroidota;c__Bacteroidia;o__Bacteroidales;f__UBA932;g__Cryptobacteroides;s__Cryptobacteroides_sp000432515	Cryptobacteroides_sp000432515	0	0	0	0	0	0	0	0	0	0	0	0	0	0	36788	0	0	4070	0	0	10495	536	0	0	0	0	0	0	0	0	0	0	0	0	0	0	0	0	0	0	0	0	43523	0	0	0	0
	d__Bacteria;p__Bacteroidota;c__Bacteroidia;o__Bacteroidales;f__Tannerellaceae;g__Parabacteroides;s__Parabacteroides_sp003473295	Parabacteroides_sp003473295	0	1247	0	0	0	0	0	0	0	0	238	0	1393	700	356	0	0	158	0	982	0	2776	147	0	0	0	0	0	0	0	0	0	0	2786	0	0	0	1109	369	344	0	2687	0	0	0	131	39
	d__Bacteria;p__Firmicutes_C;c__Negativicutes;o__Veillonellales;f__Veillonellaceae;g__Veillonella;s__Veillonella_montpellierensis	Veillonella_montpellierensis	124	2289	2595	0	0	3784	19853	0	271	70	0	1785	0	0	0	0	0	0	0	0	0	35	501	0	0	0	0	0	0	0	106	983	0	0	0	724	0	0	0	256	1373	0	0	833	1869	0	0
	d__Bacteria;p__Bacteroidota;c__Bacteroidia;o__Bacteroidales;f__Bacteroidaceae;g__Prevotella;s__Prevotella_sp002437285	Prevotella_sp002437285	0	0	0	0	0	0	0	0	0	0	157	0	163	0	0	0	0	1188	0	0	1157	0	0	0	0	0	0	0	0	0	0	0	0	0	0	0	0	0	0	0	0	0	2630	0	0	0	0
	d__Bacteria;p__Firmicutes_A;c__Clostridia;o__Clostridiales;f__Clostridiaceae;g__Clostridium;s__Clostridium_sp900759995	Clostridium_sp900759995	3729	0	0	0	0	2403	0	0	202	968	0	0	0	0	0	0	0	0	0	0	0	0	0	0	29715	0	0	0	0	1755	0	0	0	0	0	0	0	0	0	0	0	0	0	0	0	0	0
	d__Bacteria;p__Firmicutes_C;c__Negativicutes;o__Acidaminococcales;f__Acidaminococcaceae;g__Acidaminococcus;s__Acidaminococcus_fermentans_A	Acidaminococcus_fermentans_A	0	0	0	115	0	0	0	0	0	4476	0	0	614	0	9433	36819	449	0	0	0	0	0	0	0	0	0	0	0	0	0	0	953	7942	0	0	258	0	0	0	11900	2736	0	0	0	17562	0	0
	d__Bacteria;p__Bacteroidota;c__Bacteroidia;o__Bacteroidales;f__Rikenellaceae;g__Alistipes;s__Alistipes_sp002358415	Alistipes_sp002358415	0	0	0	0	0	0	0	0	0	0	0	0	532	503	1191	0	0	0	146	4647	0	5821	50	0	0	0	0	0	0	0	0	0	0	0	0	0	0	3597	0	0	0	0	0	0	0	4199	15349
	d__Bacteria;p__Firmicutes_A;c__Clostridia;o__Lachnospirales;f__Lachnospiraceae;g__Eisenbergiella;s__Eisenbergiella_porci	Eisenbergiella_porci	0	0	0	0	0	0	0	0	0	0	0	0	0	0	662	0	1297	0	0	0	0	0	0	0	0	0	0	0	0	0	0	0	0	0	0	0	0	0	0	0	0	0	0	0	0	4779	298
	d__Bacteria;p__Firmicutes_A;c__Clostridia;o__Lachnospirales;f__Lachnospiraceae;g__Schaedlerella;s__Schaedlerella_glycyrrhizinilytica_A	Schaedlerella_glycyrrhizinilytica_A	0	0	0	0	0	0	0	0	0	0	0	0	0	0	0	0	0	2026	0	0	0	422	1890	0	0	0	0	0	0	115	0	0	0	0	0	0	0	0	0	0	0	0	0	0	0	56324	423
	d__Bacteria;p__Firmicutes_A;c__Clostridia;o__Lachnospirales;f__Lachnospiraceae;g__Anaerostipes;s__Anaerostipes_sp001940315	Anaerostipes_sp001940315	0	0	0	0	0	0	0	0	0	0	156	0	342	194	489	51	0	218	31	31	0	267	1226	0	0	0	0	0	0	10	0	0	0	0	0	2214	0	1157	920	0	0	164	0	445	464	1210	3012
	d__Bacteria;p__Proteobacteria;c__Gammaproteobacteria;o__Enterobacterales;f__Enterobacteriaceae;g__Escherichia_C;s__Escherichia_C_alba	Escherichia_C_alba	365	525	214	0	236	21	685	0	1890	281	0	85	450	0	0	997	84	42	0	0	0	0	0	127	1089	0	514	406	2784	42	762	939	1150	1521	0	192	0	0	0	406	0	0	0	556	21	0	0
	d__Bacteria;p__Firmicutes_A;c__Clostridia;o__Oscillospirales;f__Ruminococcaceae;g__Ruminiclostridium_E;s__Ruminiclostridium_E_siraeum	Ruminiclostridium_E_siraeum	0	0	0	0	0	0	0	0	0	0	0	0	0	10469	0	0	0	0	730	0	0	13804	0	0	0	0	0	0	0	0	0	0	0	0	0	0	0	0	0	0	0	21375	0	0	0	0	0
	d__Bacteria;p__Firmicutes_A;c__Clostridia;o__Lachnospirales;f__Lachnospiraceae;g__Mediterraneibacter_A;s__Mediterraneibacter_A_butyricigenes	Mediterraneibacter_A_butyricigenes	0	163	0	194	0	0	0	0	0	276	1182	0	1042	1644	0	656	0	485	1168	226	540	1214	2769	16	0	0	0	0	0	844	98	0	0	0	0	337	398	1004	454	0	0	1095	65	67	289	1814	224
	d__Bacteria;p__Proteobacteria;c__Gammaproteobacteria;o__Enterobacterales;f__Enterobacteriaceae;g__Erwinia;s__Erwinia_sp003937915	Erwinia_sp003937915	390	0	0	0	0	0	0	0	249	0	0	0	0	0	0	84	0	0	0	0	0	0	0	0	0	0	0	0	1440	0	0	0	0	280	0	0	0	0	0	0	0	0	0	0	0	0	0
	d__Bacteria;p__Proteobacteria;c__Gammaproteobacteria;o__Enterobacterales;f__Enterobacteriaceae;g__Jejubacter;s__Jejubacter_calystegiae	Jejubacter_calystegiae	2984	614	166	0	248	655	538	0	1737	124	0	0	371	0	0	863	206	0	0	0	0	0	0	0	867	0	539	598	5168	0	1006	495	1206	1757	0	40	0	0	0	372	0	0	0	745	0	0	0
	d__Bacteria;p__Firmicutes_A;c__Clostridia;o__Lachnospirales;f__Lachnospiraceae;g__Schaedlerella;s__Schaedlerella_sp900066545	Schaedlerella_sp900066545	0	1274	0	0	0	0	0	0	0	0	4954	0	5166	2485	183	2130	0	206	0	624	2273	4795	4241	0	0	0	0	0	0	183	0	0	0	0	0	0	0	1472	971	0	200	6697	2403	0	4281	199	0
	d__Bacteria;p__Actinobacteriota;c__Actinomycetia;o__Actinomycetales;f__Bifidobacteriaceae;g__Parascardovia;s__Parascardovia_denticolens	Parascardovia_denticolens	5275	1941	328	880	2526	2338	2357	434	1816	4049	0	564	861	0	1653	2938	334	1636	0	0	1047	0	20	1498	0	4873	4389	2359	3116	1571	834	653	812	0	2027	160	2430	40	200	130	3808	0	554	1179	820	489	375
	d__Bacteria;p__Firmicutes_A;c__Clostridia;o__Lachnospirales;f__Lachnospiraceae;g__Schaedlerella;s__Schaedlerella_sp002320245	Schaedlerella_sp002320245	0	193	0	232	0	0	0	0	0	306	589	0	412	662	0	152	0	76	351	95	38	764	1274	0	0	0	0	0	0	1314	213	0	0	0	0	572	77	1207	1145	0	0	726	134	0	136	2395	360
	d__Bacteria;p__Firmicutes_A;c__Clostridia;o__Lachnospirales;f__Lachnospiraceae;g__Enterocloster;s__Enterocloster_sp900543885	Enterocloster_sp900543885	0	2659	0	0	0	0	0	2045	0	1312	0	2845	2814	0	0	2554	0	1713	0	0	0	0	1567	1352	0	0	0	0	0	16869	2355	0	0	0	0	11692	0	214	1394	0	4907	0	0	0	0	5744	0
	d__Bacteria;p__Firmicutes_A;c__Clostridia;o__Lachnospirales;f__Lachnospiraceae;g__Muricomes;s__Muricomes_sp000509105	Muricomes_sp000509105	0	0	0	0	0	0	0	0	0	0	0	0	0	0	1555	0	464	0	0	0	0	0	0	0	0	0	0	0	0	0	0	0	0	0	0	0	13856	0	357	0	0	0	0	0	0	0	0
	d__Bacteria;p__Bacteroidota;c__Bacteroidia;o__Bacteroidales;f__Bacteroidaceae;g__Bacteroides_H;s__Bacteroides_H_sp010500995	Bacteroides_H_sp010500995	0	693	0	155	0	0	0	13	0	0	782	0	1138	252	1160	0	0	294	55	1106	0	1206	683	3137	0	0	0	0	0	0	27	0	0	412	0	0	1167	1526	502	3029	0	296	0	0	0	1074	799
	d__Bacteria;p__Bacteroidota;c__Bacteroidia;o__Bacteroidales;f__Tannerellaceae;g__Parabacteroides;s__Parabacteroides_sp900549585	Parabacteroides_sp900549585	0	0	0	0	0	0	0	0	0	0	0	0	0	0	0	0	0	0	0	0	21471	281	0	0	0	0	0	0	0	0	0	0	0	0	0	0	0	190	0	0	0	0	0	0	0	0	0
	d__Bacteria;p__Proteobacteria;c__Gammaproteobacteria;o__Enterobacterales;f__Enterobacteriaceae;g__Erwinia_B;s__Erwinia_B_gerundensis	Erwinia_B_gerundensis	344	0	0	0	0	0	0	0	316	0	0	0	0	0	0	24	0	0	0	0	0	0	0	0	122	0	0	0	1653	0	0	0	0	195	0	0	0	0	0	0	0	0	0	0	0	0	0
	d__Bacteria;p__Bacteroidota;c__Bacteroidia;o__Bacteroidales;f__UBA932;g__Cryptobacteroides;s__Cryptobacteroides_sp002437305	Cryptobacteroides_sp002437305	0	0	0	0	0	0	0	0	0	0	8947	0	0	67874	0	0	0	0	0	0	9576	0	1253	0	0	0	0	0	0	0	0	0	0	0	0	0	0	0	0	0	0	0	0	0	0	0	0
	d__Bacteria;p__Actinobacteriota;c__Actinomycetia;o__Actinomycetales;f__Micrococcaceae;g__Rothia;s__Rothia_mucilaginosa_A	Rothia_mucilaginosa_A	19157	1783	40610	0	1777	0	416	0	0	0	0	94	0	0	0	0	0	0	0	0	0	0	0	0	1517	4395	13461	83	0	0	0	618	428	0	0	0	0	0	0	0	396	0	0	2516	0	0	0
	d__Bacteria;p__Proteobacteria;c__Gammaproteobacteria;o__Enterobacterales;f__Enterobacteriaceae;g__Kluyvera;s__Kluyvera_ascorbata	Kluyvera_ascorbata	3012	0	0	0	0	493	0	0	3089	0	0	0	0	0	0	529	0	0	0	0	0	0	0	0	249	0	0	0	5071	0	0	0	0	1431	0	0	0	0	0	0	0	0	0	0	0	0	0
	d__Bacteria;p__Proteobacteria;c__Gammaproteobacteria;o__Enterobacterales;f__Pasteurellaceae;g__Haemophilus;s__Haemophilus_haemolyticus	Haemophilus_haemolyticus	0	0	4861	0	878	0	32535	0	0	0	0	25841	0	0	0	0	0	0	0	0	0	0	619	0	0	0	0	0	0	0	0	0	0	0	0	1719	0	0	0	2034	544	0	0	0	0	0	0
	d__Bacteria;p__Actinobacteriota;c__Actinomycetia;o__Actinomycetales;f__Bifidobacteriaceae;g__Bifidobacterium;s__Bifidobacterium_magnum	Bifidobacterium_magnum	1825	2498	620	792	2318	1419	1636	349	1940	3832	0	314	977	0	2169	2710	335	2671	0	8	1784	8	102	928	0	1144	3142	2561	3202	1091	894	598	555	0	1925	103	1908	430	300	119	4530	0	588	970	544	534	473
	d__Bacteria;p__Bacteroidota;c__Bacteroidia;o__Bacteroidales;f__Tannerellaceae;g__Parabacteroides;s__Parabacteroides_chinchillae	Parabacteroides_chinchillae	0	394	0	0	0	0	0	0	0	0	175	0	506	86	314	0	0	0	0	568	0	1695	149	0	0	0	0	0	0	0	0	0	0	8910	0	0	0	1065	50	164	0	1126	0	0	0	0	0
	d__Bacteria;p__Firmicutes;c__Bacilli;o__Erysipelotrichales;f__Erysipelotrichaceae;g__Longicatena;s__Longicatena_caecimuris	Longicatena_caecimuris	0	0	0	0	0	0	0	0	0	0	0	0	0	0	0	0	0	0	0	0	0	0	0	0	0	0	0	0	0	0	0	0	0	0	0	0	0	0	0	0	0	0	0	0	0	0	0
	d__Bacteria;p__Firmicutes_A;c__Clostridia;o__Peptostreptococcales;f__Peptostreptococcaceae;g__Terrisporobacter;s__Terrisporobacter_sp900557165	Terrisporobacter_sp900557165	0	0	0	0	0	0	0	0	0	0	0	0	0	0	0	0	0	0	0	0	0	5954	656	0	0	0	0	0	0	0	0	0	0	0	0	0	0	1100	0	0	0	0	0	0	0	0	0
	d__Bacteria;p__Proteobacteria;c__Gammaproteobacteria;o__Enterobacterales;f__Enterobacteriaceae;g__Scandinavium;s__Scandinavium_sp009668205	Scandinavium_sp009668205	1606	661	375	0	756	273	723	0	2004	247	0	163	145	0	0	1037	249	0	0	0	0	0	0	0	1186	0	885	725	3944	0	1057	733	1079	2701	0	84	0	0	0	352	0	0	0	1487	0	0	0
	d__Bacteria;p__Bacteroidota;c__Bacteroidia;o__Bacteroidales;f__Bacteroidaceae;g__Phocaeicola;s__Phocaeicola_sp900541515	Phocaeicola_sp900541515	0	331	0	0	0	0	0	0	0	0	251	0	444	74	660	0	0	0	0	1280	0	300	257	731	0	0	0	0	0	0	0	0	0	185	0	0	0	7489	420	932	0	147	0	0	0	1632	973
	d__Bacteria;p__Firmicutes_A;c__Clostridia;o__Oscillospirales;f__Ruminococcaceae;g__Gemmiger;s__Gemmiger_variabilis_B	Gemmiger_variabilis_B	0	0	0	0	0	0	0	0	0	0	381	0	1339	1434	153	0	0	229	1028	623	194	667	452	0	0	0	0	0	0	0	0	0	0	0	0	0	0	12909	13306	0	0	14196	0	0	0	1139	1553
	d__Bacteria;p__Actinobacteriota;c__Coriobacteriia;o__Coriobacteriales;f__Coriobacteriaceae;g__Collinsella;s__Collinsella_bouchesdurhonensis	Collinsella_bouchesdurhonensis	0	14521	0	0	0	0	0	0	0	0	1312	0	10330	0	0	0	845	1317	0	1774	0	0	5502	0	0	0	0	0	0	27834	0	0	0	0	0	0	0	11109	0	0	4453	0	1527	0	0	0	0
	d__Bacteria;p__Firmicutes_A;c__Clostridia;o__Christensenellales;f__CAG-74;g__UBA11524;s__UBA11524_sp000437595	UBA11524_sp000437595	0	0	0	0	0	0	0	0	0	0	2732	0	0	3556	0	0	0	0	0	0	0	0	0	0	0	0	0	0	0	0	0	0	0	0	0	0	0	0	0	0	0	0	0	0	0	0	0
	d__Bacteria;p__Proteobacteria;c__Gammaproteobacteria;o__Enterobacterales;f__Enterobacteriaceae;g__Atlantibacter;s__Atlantibacter_sp002358165	Atlantibacter_sp002358165	340	441	83	0	280	27	165	0	1905	197	0	0	110	0	0	964	0	0	0	0	0	0	0	0	799	0	549	414	3288	0	521	363	770	1697	0	0	0	0	0	284	0	0	0	502	0	0	0
	d__Bacteria;p__Bacteroidota;c__Bacteroidia;o__Bacteroidales;f__UBA932;g__Cryptobacteroides;s__Cryptobacteroides_sp900546925	Cryptobacteroides_sp900546925	0	0	0	0	0	0	0	0	0	0	0	0	0	0	47992	0	0	6567	0	0	23841	714	0	0	0	0	0	0	0	0	0	0	0	0	0	0	0	0	0	0	0	0	1359	0	0	0	0
	d__Bacteria;p__Bacteroidota;c__Bacteroidia;o__Bacteroidales;f__Bacteroidaceae;g__Phocaeicola;s__Phocaeicola_sp000432735	Phocaeicola_sp000432735	0	0	0	0	0	0	0	0	0	0	300	0	638	0	1262	0	0	0	0	1173	0	784	342	213	0	0	0	0	0	0	0	0	0	0	0	0	43	5533	0	2209	0	0	0	0	0	931	600
	d__Bacteria;p__Firmicutes_A;c__Clostridia;o__Oscillospirales;f__Acutalibacteraceae;g__UMGS1071;s__UMGS1071_sp900542375	UMGS1071_sp900542375	0	0	0	0	0	0	0	0	0	0	0	0	0	0	0	17745	0	0	0	0	0	0	0	0	0	0	0	0	0	0	0	0	0	0	0	0	0	3632	0	0	0	0	0	0	0	0	975
	d__Bacteria;p__Firmicutes_A;c__Clostridia;o__Lachnospirales;f__Lachnospiraceae;g__Blautia_A;s__Blautia_A_sp900066205	Blautia_A_sp900066205	0	0	0	0	0	0	0	0	0	0	1099	0	4011	10344	2251	0	0	690	0	0	0	0	0	0	0	0	0	0	0	10887	0	0	0	0	0	7944	0	4080	4949	0	0	0	2100	0	0	0	0
	d__Bacteria;p__Firmicutes_A;c__Clostridia;o__Lachnospirales;f__Lachnospiraceae;g__Choladocola;s__Choladocola_sp003480725	Choladocola_sp003480725	0	0	0	0	0	0	0	0	0	0	8039	0	0	2499	0	0	0	159	3317	0	0	0	908	0	0	0	0	0	0	0	0	0	0	0	0	0	0	825	743	0	0	3724	0	0	0	65	0
	d__Bacteria;p__Firmicutes_A;c__Clostridia;o__Eubacteriales;f__Eubacteriaceae;g__Eubacterium;s__Eubacterium_limosum	Eubacterium_limosum	0	0	0	1182	0	0	0	72802	0	0	0	0	0	0	0	0	0	0	0	0	0	0	5259	0	0	0	0	0	0	0	0	0	0	0	0	0	281	0	0	0	0	0	0	0	0	0	0
	d__Bacteria;p__Firmicutes_A;c__Clostridia;o__Peptostreptococcales;f__Peptostreptococcaceae;g__CCUG-7971;s__unknown	unknown	0	0	0	0	0	0	0	0	0	0	0	0	0	0	0	0	0	0	0	0	0	0	0	151	0	0	0	0	0	0	0	0	0	0	0	0	0	0	0	0	0	0	0	0	0	0	0
	d__Bacteria;p__Firmicutes_C;c__Negativicutes;o__Veillonellales;f__Megasphaeraceae;g__Megasphaera;s__Megasphaera_sp002319965	Megasphaera_sp002319965	0	3974	0	0	0	0	0	0	548	4945	0	0	3395	0	551	1649	1685	0	0	567	1091	0	0	1093	0	0	0	1094	0	5107	1699	0	1123	0	0	0	6479	0	0	2196	16466	0	2347	15797	4519	563	0
	d__Bacteria;p__Bacteroidota;c__Bacteroidia;o__Bacteroidales;f__Bacteroidaceae;g__Phocaeicola;s__Phocaeicola_paurosaccharolyticus	Phocaeicola_paurosaccharolyticus	0	68	0	0	0	0	0	0	0	0	222	0	239	98	312	0	0	150	0	632	0	241	192	476	0	0	0	0	0	0	0	0	0	272	0	0	55	1312	110	892	0	198	0	0	0	1189	1829
	d__Bacteria;p__Firmicutes_A;c__Clostridia;o__Lachnospirales;f__Lachnospiraceae;g__CAG-45;s__CAG-45_sp000438375	CAG-45_sp000438375	0	0	0	0	0	0	0	0	0	0	0	0	0	0	0	0	0	0	0	0	0	5745	1809	0	0	0	0	0	0	0	0	0	0	0	0	0	0	0	0	0	0	0	0	0	0	0	0
	d__Bacteria;p__Firmicutes_A;c__Clostridia;o__Oscillospirales;f__Acutalibacteraceae;g__Hydrogeniiclostridium;s__Hydrogeniiclostridium_mannosilyticum	Hydrogeniiclostridium_mannosilyticum	0	0	0	0	0	0	0	0	0	0	0	0	0	0	0	0	0	0	0	0	0	0	0	0	0	0	0	0	0	0	0	0	0	0	0	0	0	0	0	0	0	0	0	0	0	0	0
	d__Bacteria;p__Firmicutes_A;c__Clostridia;o__Oscillospirales;f__Oscillospiraceae;g__CAG-83;s__CAG-83_sp900549395	CAG-83_sp900549395	0	0	0	0	0	0	0	0	0	0	960	0	0	39966	26319	0	0	0	1034	0	3205	5189	0	0	0	0	0	0	0	0	0	0	0	0	0	0	0	28	0	0	0	845	0	0	0	0	0
	d__Bacteria;p__Firmicutes_A;c__Clostridia;o__Oscillospirales;f__Acutalibacteraceae;g__Fimenecus;s__Fimenecus_sp004556705	Fimenecus_sp004556705	0	0	0	0	0	0	0	0	0	0	0	0	228	117	0	0	0	872	0	118	0	72409	804	0	0	0	0	0	0	0	0	0	0	0	0	0	0	119	0	0	0	1300	0	0	0	0	0
	d__Bacteria;p__Firmicutes;c__Bacilli;o__RF39;f__UBA660;g__Ventrenecus;s__Ventrenecus_sp905205665	Ventrenecus_sp905205665	0	0	0	0	0	0	0	0	0	0	2377	0	0	45	0	0	0	0	17124	0	0	22006	0	0	0	0	0	0	0	0	0	0	0	0	0	0	0	843	0	0	0	35223	0	0	0	0	0
	d__Bacteria;p__Firmicutes_A;c__Clostridia;o__Oscillospirales;f__Acutalibacteraceae;g__CAG-177;s__CAG-177_sp003538135	CAG-177_sp003538135	0	0	0	0	0	0	0	0	0	0	0	0	0	0	19694	0	0	0	0	0	36732	18709	0	0	0	0	0	0	0	0	0	0	0	0	0	0	0	2339	0	0	0	0	0	0	0	0	0
	d__Bacteria;p__Firmicutes_C;c__Negativicutes;o__Selenomonadales;f__Selenomonadaceae;g__Megamonas;s__Megamonas_hypermegale	Megamonas_hypermegale	0	0	0	0	0	0	0	0	0	0	0	0	0	0	0	0	0	0	0	104	0	0	0	0	0	0	0	0	0	0	0	0	0	0	0	0	0	529	0	0	0	0	0	0	0	0	0
	d__Bacteria;p__Firmicutes_A;c__Clostridia;o__Lachnospirales;f__Lachnospiraceae;g__Luxibacter;s__Luxibacter_massiliensis	Luxibacter_massiliensis	0	0	0	0	0	0	0	0	0	0	1640	0	0	0	0	0	0	0	0	1063	0	0	619	0	0	0	0	0	0	0	0	0	0	0	0	0	0	0	0	27834	0	411	0	0	0	14477	0
	d__Bacteria;p__Bacteroidota;c__Bacteroidia;o__Bacteroidales;f__Bacteroidaceae;g__Bacteroides;s__Bacteroides_ihuae	Bacteroides_ihuae	0	365	0	0	0	0	0	0	0	0	611	0	756	142	678	0	0	259	47	1036	0	683	461	1885	0	0	0	0	0	0	0	0	0	310	0	0	477	1283	427	1855	0	524	0	0	0	903	1061
	d__Bacteria;p__Firmicutes;c__Bacilli;o__Lactobacillales;f__Streptococcaceae;g__Streptococcus;s__Streptococcus_mitis_BM	Streptococcus_mitis_BM	14521	625	5280	0	4400	1458	10560	1936	0	0	0	2400	437	0	0	0	0	0	0	0	0	0	0	0	0	1812	13201	0	3600	2283	452	5280	1800	0	0	935	1272	0	0	0	0	0	0	0	0	0	0
	d__Bacteria;p__Desulfobacterota_I;c__Desulfovibrionia;o__Desulfovibrionales;f__Desulfovibrionaceae;g__Mailhella;s__Mailhella_excrementigallinarum	Mailhella_excrementigallinarum	0	0	0	0	0	0	0	0	0	0	0	0	0	4476	0	0	47083	0	352	0	14776	0	0	0	0	0	0	0	0	0	0	0	0	0	0	0	0	0	0	0	0	0	0	0	0	0	0
	d__Bacteria;p__Synergistota;c__Synergistia;o__Synergistales;f__Dethiosulfovibrionaceae;g__Pyramidobacter;s__Pyramidobacter_piscolens	Pyramidobacter_piscolens	0	0	0	0	0	0	0	0	0	0	0	0	0	0	4240	0	0	0	0	0	0	0	0	0	0	0	0	0	0	0	0	0	0	0	0	0	0	0	0	40132	0	28579	0	0	1968	0	0
	d__Bacteria;p__Firmicutes;c__Bacilli;o__Lactobacillales;f__Streptococcaceae;g__Lactococcus;s__Lactococcus_lactis	Lactococcus_lactis	0	0	0	0	0	0	0	0	0	0	0	0	0	0	0	0	0	0	0	0	0	0	0	0	0	0	0	0	0	0	0	0	0	0	0	0	0	50146	0	0	0	0	0	0	0	0	0
	d__Bacteria;p__Firmicutes_A;c__Clostridia;o__Lachnospirales;f__Lachnospiraceae;g__Faecalimonas;s__unknown	unknown	0	0	0	0	0	0	0	0	0	0	0	0	0	0	0	0	0	0	0	0	0	0	0	3278	0	0	0	0	0	11701	0	0	0	0	0	0	0	0	0	0	0	0	0	0	1225	94	0
	d__Bacteria;p__Proteobacteria;c__Gammaproteobacteria;o__Enterobacterales;f__Enterobacteriaceae;g__Cedecea;s__Cedecea_davisae	Cedecea_davisae	761	0	0	0	0	256	0	0	1140	0	0	0	0	0	0	500	0	0	0	0	0	0	0	0	620	0	0	0	3183	0	0	125	0	898	0	0	0	0	0	0	0	0	0	0	0	0	0
	d__Bacteria;p__Firmicutes_A;c__Clostridia;o__Peptostreptococcales;f__Anaerovoracaceae;g__CAG-238;s__CAG-238_sp900542245	CAG-238_sp900542245	0	0	0	0	0	0	0	0	0	0	40037	0	0	12185	19996	0	0	0	0	0	1213	0	0	0	0	0	0	0	0	0	0	0	0	0	0	0	0	0	0	0	0	0	0	0	0	0	0
	d__Bacteria;p__Bacteroidota;c__Bacteroidia;o__Bacteroidales;f__Bacteroidaceae;g__Bacteroides;s__Bacteroides_faecalis	Bacteroides_faecalis	0	1057	0	504	0	0	0	0	0	0	1317	0	3736	608	1239	0	0	0	0	2730	0	3564	44	89	0	0	0	0	0	0	0	0	0	0	0	0	489	1001	1392	2524	0	0	0	0	0	855	345
	d__Bacteria;p__Bacteroidota;c__Bacteroidia;o__Bacteroidales;f__Tannerellaceae;g__Parabacteroides;s__Parabacteroides_sp014287585	Parabacteroides_sp014287585	0	1514	0	0	0	0	0	0	0	0	0	0	2219	159	0	0	0	0	0	0	0	53	0	0	0	0	0	0	0	0	0	0	0	0	0	0	0	0	0	0	0	0	0	0	0	0	0
	d__Bacteria;p__Firmicutes_A;c__Clostridia;o__Clostridiales;f__Clostridiaceae;g__Clostridium_P;s__unknown	unknown	2422	0	0	0	0	171	0	0	413	0	0	0	0	1454	0	0	0	0	0	0	0	19	661	0	402	0	0	0	0	0	0	0	0	0	0	0	0	0	0	0	0	0	0	0	0	0	0
	d__Bacteria;p__Firmicutes_A;c__Clostridia;o__Lachnospirales;f__Lachnospiraceae;g__Roseburia;s__Roseburia_sp900550935	Roseburia_sp900550935	0	0	0	0	0	0	0	0	0	0	536	0	144	282	0	0	0	0	248	459	0	742	17638	0	0	0	0	0	0	0	0	0	0	0	0	179	0	635	36	0	0	381	0	0	0	0	0
	d__Bacteria;p__Firmicutes_C;c__Negativicutes;o__Veillonellales;f__Megasphaeraceae;g__Caecibacter;s__Caecibacter_massiliensis	Caecibacter_massiliensis	0	0	0	6863	0	0	0	0	0	10155	0	0	4636	0	5328	6851	313	536	0	0	315	0	1195	0	0	0	0	0	0	15843	4315	0	71	0	0	0	1769	0	526	10156	1891	0	211	0	872	0	0
	d__Bacteria;p__Proteobacteria;c__Gammaproteobacteria;o__Enterobacterales;f__Enterobacteriaceae;g__Citrobacter;s__Citrobacter_braakii	Citrobacter_braakii	0	0	0	0	0	0	0	0	1014	0	0	0	0	0	0	0	0	0	0	0	0	0	0	0	0	0	0	0	2775	0	0	0	0	0	0	0	0	0	0	0	0	0	0	0	0	0	0
	d__Bacteria;p__Firmicutes;c__Bacilli;o__Erysipelotrichales;f__Coprobacillaceae;g__Catenibacterium;s__Catenibacterium_mitsuokai	Catenibacterium_mitsuokai	0	0	0	0	0	0	0	0	0	0	534	0	0	4866	0	0	0	16739	0	3779	1190	0	8505	0	0	0	0	0	0	0	0	0	0	0	0	0	0	0	0	0	26991	0	8092	0	0	0	0
	d__Bacteria;p__Proteobacteria;c__Gammaproteobacteria;o__Enterobacterales;f__Enterobacteriaceae;g__Kluyvera;s__Kluyvera_ascorbata_B	Kluyvera_ascorbata_B	2708	0	0	0	0	682	0	0	3439	0	0	0	0	0	0	418	0	0	0	0	0	0	0	0	0	0	0	0	3082	0	0	0	64	323	0	0	0	0	0	0	0	0	0	0	0	0	0
	d__Bacteria;p__Firmicutes_A;c__Clostridia;o__Lachnospirales;f__Lachnospiraceae;g__Blautia_A;s__Blautia_A_sp000436615	Blautia_A_sp000436615	0	0	0	0	0	0	0	0	0	0	0	0	0	168	0	0	0	0	3574	0	0	861	0	0	0	0	0	0	0	0	0	0	0	0	0	0	0	0	990	0	0	63769	0	0	0	0	0
	d__Bacteria;p__Proteobacteria;c__Gammaproteobacteria;o__Enterobacterales;f__Enterobacteriaceae;g__Jejubacter;s__Jejubacter_sp019140855	Jejubacter_sp019140855	1054	304	330	0	167	254	726	0	1542	165	0	114	167	0	0	755	283	84	0	0	0	0	0	49	733	0	576	422	2714	0	523	537	947	1727	0	184	0	0	0	304	0	0	0	807	0	82	0
	d__Bacteria;p__Bacteroidota;c__Bacteroidia;o__Bacteroidales;f__Bacteroidaceae;g__Phocaeicola;s__Phocaeicola_sp900540105	Phocaeicola_sp900540105	0	55	0	0	0	0	0	0	0	0	163	0	790	0	557	0	0	107	0	1042	0	382	514	504	0	0	0	0	0	0	0	0	0	331	0	0	0	3082	0	1132	0	251	0	0	0	867	812
	d__Bacteria;p__Firmicutes_A;c__Clostridia;o__Lachnospirales;f__Lachnospiraceae;g__Enterocloster;s__Enterocloster_porci	Enterocloster_porci	0	4198	0	0	0	0	0	0	0	0	0	0	2303	0	0	0	283	0	0	0	0	0	0	7000	0	0	0	0	0	26	0	0	0	0	0	396	0	0	0	0	0	206	0	1830	129	427	0
	d__Bacteria;p__Proteobacteria;c__Gammaproteobacteria;o__Enterobacterales;f__Enterobacteriaceae;g__Phytobacter;s__Phytobacter_diazotrophicus	Phytobacter_diazotrophicus	0	0	0	0	0	0	0	0	0	0	0	0	0	0	0	0	0	0	0	0	0	0	0	0	0	0	0	0	0	0	0	0	0	0	0	0	0	0	0	0	0	0	0	0	0	0	0
	d__Bacteria;p__Firmicutes_A;c__Clostridia;o__Oscillospirales;f__Oscillospiraceae;g__CAG-83;s__CAG-83_sp900551355	CAG-83_sp900551355	0	0	0	0	0	0	0	0	0	0	0	0	0	0	0	0	0	0	694	0	0	68380	0	0	0	0	0	0	0	0	0	0	0	0	0	0	0	51	0	0	0	0	0	0	0	0	0
	d__Bacteria;p__Actinobacteriota;c__Actinomycetia;o__Actinomycetales;f__Bifidobacteriaceae;g__Bifidobacterium;s__Bifidobacterium_cuniculi	Bifidobacterium_cuniculi	2406	1317	288	1024	1190	1640	731	171	1594	3181	0	179	401	0	978	2015	136	1008	0	0	428	0	0	1023	0	1494	940	1604	1233	1743	456	527	271	0	316	22	1488	0	90	68	2455	0	407	745	780	559	261
	d__Bacteria;p__Bacteroidota;c__Bacteroidia;o__Bacteroidales;f__Bacteroidaceae;g__Prevotella;s__Prevotella_sp900548745	Prevotella_sp900548745	0	0	0	0	0	0	0	0	0	0	0	0	78	79	0	0	0	0	0	0	16083	0	0	0	0	0	0	0	0	0	0	0	0	0	0	0	0	0	0	0	0	0	671	0	0	0	0
	d__Bacteria;p__Firmicutes_A;c__Clostridia;o__Oscillospirales;f__Acutalibacteraceae;g__Ruminococcus_E;s__Ruminococcus_E_sp900314705	Ruminococcus_E_sp900314705	0	0	0	0	0	0	0	0	0	0	0	0	0	0	0	0	0	0	0	0	0	0	0	0	0	0	0	0	0	0	0	0	0	0	0	0	0	0	0	0	0	0	0	0	0	0	0
	d__Bacteria;p__Firmicutes;c__Bacilli;o__Staphylococcales;f__Staphylococcaceae;g__Staphylococcus;s__Staphylococcus_hominis	Staphylococcus_hominis	608	0	18426	0	0	0	0	0	0	0	0	0	0	0	0	0	0	0	0	0	0	0	0	0	0	0	7129	0	0	0	0	1381	0	0	0	0	0	0	0	0	4618	0	0	0	0	0	0
	d__Bacteria;p__Bacteroidota;c__Bacteroidia;o__Bacteroidales;f__Bacteroidaceae;g__Prevotella;s__Prevotella_sp900290275	Prevotella_sp900290275	0	0	0	0	0	0	0	0	0	0	0	0	222	994	0	0	0	6371	0	0	10890	0	0	0	0	0	0	0	0	0	0	0	0	0	0	0	0	0	0	0	0	0	23294	0	0	0	0
	d__Bacteria;p__Firmicutes_C;c__Negativicutes;o__Veillonellales;f__Megasphaeraceae;g__Megasphaera;s__Megasphaera_cerevisiae	Megasphaera_cerevisiae	0	5307	0	503	0	31	0	0	956	4284	0	0	3130	0	649	2158	878	747	0	31	458	0	0	1926	0	0	0	3844	0	7776	1266	63	341	0	0	551	1008	0	0	2486	9940	0	1993	10662	4766	330	0
	d__Bacteria;p__Actinobacteriota;c__Coriobacteriia;o__Coriobacteriales;f__Coriobacteriaceae;g__Collinsella;s__Collinsella_intestinalis	Collinsella_intestinalis	0	0	0	0	0	0	0	0	0	0	0	0	0	0	0	0	0	0	0	0	0	0	0	0	0	0	0	0	0	0	0	0	0	0	0	0	0	0	0	0	0	0	0	0	0	0	0
	d__Bacteria;p__Bacteroidota;c__Bacteroidia;o__Bacteroidales;f__Bacteroidaceae;g__Prevotella;s__Prevotella_albensis	Prevotella_albensis	0	737	0	0	0	0	0	0	0	0	6636	0	2303	3189	141	0	203	1824	717	1624	686	712	2200	0	0	0	0	0	0	20	0	0	0	0	0	0	163	4245	5198	996	824	0	6151	0	0	112	60
	d__Bacteria;p__Bacteroidota;c__Bacteroidia;o__Bacteroidales;f__Bacteroidaceae;g__Prevotella;s__Prevotella_sp002479145	Prevotella_sp002479145	0	0	0	0	0	0	0	0	0	0	0	0	79	121	0	0	0	24231	0	0	13019	4958	0	0	0	0	0	0	0	0	0	0	0	0	0	0	0	0	0	0	0	0	5824	0	0	0	0
	d__Bacteria;p__Firmicutes_A;c__Clostridia;o__Lachnospirales;f__Lachnospiraceae;g__Blautia_A;s__Blautia_A_sp900066335	Blautia_A_sp900066335	0	0	0	0	0	0	0	0	0	0	0	0	0	0	1364	0	0	517	0	0	0	328	0	0	0	0	0	0	0	9144	25149	0	0	0	0	0	0	904	405	0	0	0	806	0	0	0	0
	d__Bacteria;p__Firmicutes_A;c__Clostridia;o__Oscillospirales;f__Oscillospiraceae;g__ER4;s__ER4_sp003522105	ER4_sp003522105	0	0	0	0	0	0	0	0	0	0	10223	0	0	11354	0	0	0	0	7163	0	3619	25469	0	0	0	0	0	0	0	0	0	0	0	0	0	0	0	2297	0	0	0	737	0	0	0	0	0
	d__Bacteria;p__Proteobacteria;c__Gammaproteobacteria;o__Enterobacterales;f__Enterobacteriaceae;g__Enterobacter;s__Enterobacter_sp003057745	Enterobacter_sp003057745	0	0	0	0	0	0	0	0	0	0	0	0	0	0	0	0	0	0	0	0	0	0	0	0	0	0	0	0	4748	0	0	0	0	0	0	0	0	0	0	0	0	0	0	0	0	0	0
	d__Bacteria;p__Firmicutes_C;c__Negativicutes;o__Veillonellales;f__Veillonellaceae;g__Veillonella_A;s__Veillonella_A_sp010093125	Veillonella_A_sp010093125	0	617	270	0	0	888	3878	0	0	5118	0	358	0	0	0	0	0	0	0	0	0	0	0	0	0	0	0	0	0	0	2287	1382	0	0	0	11	0	0	0	0	184	0	0	35	125	0	0
	d__Bacteria;p__Desulfobacterota_I;c__Desulfovibrionia;o__Desulfovibrionales;f__Desulfovibrionaceae;g__Bilophila;s__Bilophila_sp900550745	Bilophila_sp900550745	0	0	0	0	0	0	0	0	0	0	2469	0	0	0	0	0	0	0	0	526	0	0	1006	0	0	0	0	0	0	0	5304	0	0	0	0	0	4122	0	1561	0	0	0	0	0	0	0	0
	d__Bacteria;p__Actinobacteriota;c__Actinomycetia;o__Actinomycetales;f__Bifidobacteriaceae;g__Bifidobacterium;s__Bifidobacterium_commune	Bifidobacterium_commune	2943	1457	199	906	1463	1113	951	114	1100	2731	0	161	939	0	1894	2019	230	1628	0	0	957	0	30	1019	0	3228	2146	1595	1192	924	316	238	306	0	455	92	1134	200	255	46	4168	0	175	785	521	279	197
	d__Bacteria;p__Proteobacteria;c__Gammaproteobacteria;o__Enterobacterales;f__Pasteurellaceae;g__Haemophilus_D;s__Haemophilus_D_parainfluenzae_J	Haemophilus_D_parainfluenzae_J	0	132	229	0	434	0	0	0	0	0	0	0	0	0	0	0	0	0	0	216	0	0	880	0	0	347	0	0	0	0	0	0	0	0	0	0	0	0	0	4106	573	0	216	0	0	0	0
	d__Bacteria;p__Bacteroidota;c__Bacteroidia;o__Bacteroidales;f__Bacteroidaceae;g__Phocaeicola;s__Phocaeicola_merdavium	Phocaeicola_merdavium	0	235	0	0	0	0	0	0	0	0	354	0	410	0	707	0	0	157	0	695	0	562	370	436	0	0	0	0	0	0	0	0	0	317	0	0	0	2110	39	1289	0	58	0	0	0	432	527
	d__Bacteria;p__Firmicutes_A;c__Clostridia;o__Oscillospirales;f__Oscillospiraceae;g__ER4;s__ER4_sp900768135	ER4_sp900768135	0	0	0	0	0	0	0	0	0	0	8004	0	0	13441	0	0	0	0	7575	0	2945	23377	0	0	0	0	0	0	0	0	0	0	0	0	0	0	0	2089	0	0	0	1473	0	0	0	0	0
	d__Bacteria;p__Bacteroidota;c__Bacteroidia;o__Bacteroidales;f__Tannerellaceae;g__Parabacteroides;s__Parabacteroides_distasonis_A	Parabacteroides_distasonis_A	0	0	0	0	0	0	0	0	0	0	0	0	0	0	226	0	0	0	0	808	0	1280	0	0	0	0	0	0	0	0	0	0	0	13194	0	0	0	46	0	0	0	0	0	0	0	0	0
	d__Bacteria;p__Desulfobacterota_I;c__Desulfovibrionia;o__Desulfovibrionales;f__Desulfovibrionaceae;g__Desulfovibrio;s__Desulfovibrio_sp900319575	Desulfovibrio_sp900319575	0	0	0	0	0	0	0	0	0	2365	0	0	0	0	0	15293	0	0	0	0	2256	0	0	0	0	0	0	0	0	0	0	0	0	0	0	0	0	0	0	25948	0	16798	0	0	0	0	0
	d__Bacteria;p__Firmicutes_A;c__Clostridia;o__Lachnospirales;f__Lachnospiraceae;g__Agathobacter;s__Agathobacter_sp905209075	Agathobacter_sp905209075	0	0	0	0	0	0	0	0	0	0	630	0	854	18457	0	4232	0	0	0	850	0	99	5126	0	0	0	0	0	0	0	0	0	0	0	0	50	0	0	352	0	0	0	0	0	0	0	0
	d__Bacteria;p__Firmicutes_A;c__Clostridia;o__Clostridiales;f__Clostridiaceae;g__Clostridium_P;s__Clostridium_P_mediterraneense	Clostridium_P_mediterraneense	1670	0	0	0	0	464	0	0	52	0	0	0	0	0	0	0	0	0	0	0	0	0	26	0	22849	0	0	0	0	0	0	0	0	0	0	0	0	0	0	0	0	0	0	0	0	0	0
	d__Bacteria;p__Firmicutes_C;c__Negativicutes;o__Acidaminococcales;f__Acidaminococcaceae;g__Phascolarctobacterium;s__Phascolarctobacterium_sp900545535	Phascolarctobacterium_sp900545535	0	0	0	0	0	0	0	0	0	0	0	0	0	0	0	0	0	0	0	0	0	0	0	0	0	0	0	0	0	0	0	0	0	0	0	0	0	0	0	16200	0	0	0	0	0	0	0
	d__Bacteria;p__Proteobacteria;c__Gammaproteobacteria;o__Enterobacterales;f__Enterobacteriaceae;g__Serratia;s__Serratia_symbiotica	Serratia_symbiotica	723	56	0	0	0	360	0	0	1032	110	0	0	0	0	0	582	0	0	0	0	0	0	0	0	330	0	55	55	2861	0	27	245	222	1091	0	0	0	0	0	138	0	0	0	27	0	0	0
	d__Bacteria;p__Actinobacteriota;c__Actinomycetia;o__Actinomycetales;f__Bifidobacteriaceae;g__Bifidobacterium;s__Bifidobacterium_bombi	Bifidobacterium_bombi	2041	2143	128	552	1750	1453	1608	187	1213	2698	0	424	934	0	1468	1924	340	1484	0	0	1029	7	37	761	0	2363	2463	1558	1755	736	488	461	462	0	780	134	1431	373	377	194	3083	7	349	866	500	384	230
	d__Bacteria;p__Proteobacteria;c__Gammaproteobacteria;o__Enterobacterales;f__Enterobacteriaceae;g__Proteus;s__Proteus_hauseri	Proteus_hauseri	0	0	0	0	0	0	0	0	32318	2792	0	0	0	0	0	2872	0	0	0	0	0	0	0	0	0	0	0	0	0	0	0	0	160	0	0	0	0	0	0	0	0	0	0	0	558	0	0
	d__Bacteria;p__Bacteroidota;c__Bacteroidia;o__Bacteroidales;f__Bacteroidaceae;g__Phocaeicola;s__Phocaeicola_faecipullorum_A	Phocaeicola_faecipullorum_A	0	0	0	0	0	0	0	0	0	0	306	0	470	0	381	0	0	0	0	679	0	584	48	713	0	0	0	0	0	0	0	0	0	766	0	0	0	2451	187	1579	0	70	0	0	0	541	665
	d__Bacteria;p__Firmicutes_A;c__Clostridia;o__Lachnospirales;f__Lachnospiraceae;g__Anaerostipes;s__Anaerostipes_butyraticus	Anaerostipes_butyraticus	0	0	0	0	0	0	0	0	0	0	124	0	341	128	359	142	0	0	14	0	0	240	1221	0	0	0	0	0	0	56	0	0	0	0	0	1024	0	844	492	0	0	210	0	144	156	902	2086
	d__Bacteria;p__Firmicutes_A;c__Clostridia;o__Lachnospirales;f__Lachnospiraceae;g__Eubacterium_I;s__Eubacterium_I_sp900546495	Eubacterium_I_sp900546495	0	0	0	0	0	0	0	0	0	0	0	0	0	2287	0	0	0	0	0	0	0	0	2349	0	0	0	0	0	0	0	0	0	0	0	0	0	0	1082	0	0	0	5194	0	0	0	0	0
	d__Bacteria;p__Firmicutes_A;c__Clostridia;o__Lachnospirales;f__Lachnospiraceae;g__COE1;s__COE1_sp900753305	COE1_sp900753305	0	0	0	0	0	0	0	0	0	0	283	0	0	71	0	0	0	0	10478	0	0	0	0	0	0	0	0	0	0	0	0	0	0	0	0	0	0	0	0	0	0	9303	0	0	0	0	0
	d__Bacteria;p__Proteobacteria;c__Gammaproteobacteria;o__Enterobacterales;f__Enterobacteriaceae;g__Shimwellia;s__Shimwellia_blattae	Shimwellia_blattae	1700	230	0	0	170	610	172	0	798	132	0	0	114	0	0	502	38	0	0	0	0	0	0	0	511	0	304	323	2897	0	249	190	381	1278	0	0	0	0	0	76	0	0	0	361	0	0	0
	d__Bacteria;p__Firmicutes_A;c__Clostridia;o__Oscillospirales;f__Acutalibacteraceae;g__Clostridium_A;s__Clostridium_A_leptum	Clostridium_A_leptum	0	0	0	0	0	0	0	0	0	0	0	0	0	0	0	0	0	0	0	0	0	916	0	0	0	0	0	0	0	0	0	0	0	0	0	0	0	0	0	0	0	0	0	0	0	0	0
	d__Bacteria;p__Firmicutes;c__Bacilli;o__Lactobacillales;f__Enterococcaceae;g__Enterococcus_A;s__Enterococcus_A_hulanensis	Enterococcus_A_hulanensis	0	0	0	0	3006	0	0	0	2024	1561	0	0	0	0	0	705	0	0	0	0	0	0	0	5340	0	0	0	0	13043	0	1706	241	0	0	0	0	933	0	0	0	0	0	0	0	0	0	0
	d__Bacteria;p__Proteobacteria;c__Gammaproteobacteria;o__Enterobacterales;f__Enterobacteriaceae;g__Phytobacter;s__Phytobacter_massiliensis	Phytobacter_massiliensis	812	71	0	0	95	305	0	0	1183	0	0	0	0	0	0	854	0	0	0	0	0	0	0	0	431	0	167	72	2802	0	48	142	143	1080	0	0	0	0	0	0	0	0	0	24	0	0	0
	d__Bacteria;p__Firmicutes_A;c__Clostridia;o__Oscillospirales;f__Oscillospiraceae;g__ER4;s__ER4_sp016295615	ER4_sp016295615	0	0	0	0	0	0	0	0	0	0	5292	0	0	15623	0	0	0	0	6313	0	2440	13977	474	0	0	0	0	0	0	0	0	0	0	0	0	0	0	2110	0	0	0	3972	0	0	0	0	0
	d__Bacteria;p__Proteobacteria;c__Gammaproteobacteria;o__Enterobacterales;f__Enterobacteriaceae;g__Siccibacter;s__Siccibacter_colletis	Siccibacter_colletis	1798	24	0	0	0	814	0	0	722	0	0	0	0	0	0	377	0	0	0	0	0	0	0	0	313	0	0	0	3736	0	0	0	94	1065	0	0	0	0	0	0	0	0	0	0	0	0	0
	d__Bacteria;p__Bacteroidota;c__Bacteroidia;o__Bacteroidales;f__Bacteroidaceae;g__Prevotella;s__Prevotella_sp902803475	Prevotella_sp902803475	0	799	0	0	0	0	0	0	0	0	4737	0	2357	2201	16	0	381	3194	644	1722	1053	1395	1347	0	0	0	0	0	0	0	0	0	0	0	0	0	246	4166	3245	887	631	0	5999	0	0	301	223
	d__Bacteria;p__Firmicutes_A;c__Clostridia;o__Lachnospirales;f__Lachnospiraceae;g__Roseburia;s__Roseburia_sp900753715	Roseburia_sp900753715	0	0	0	0	0	0	0	0	0	0	661	0	365	934	0	0	0	0	867	1055	0	797	15087	0	0	0	0	0	0	0	0	0	0	0	0	627	0	610	184	0	0	618	0	0	0	0	0
	d__Bacteria;p__Proteobacteria;c__Gammaproteobacteria;o__Enterobacterales;f__Enterobacteriaceae;g__Proteus;s__Proteus_vulgaris_B	Proteus_vulgaris_B	0	0	0	0	0	0	0	0	14965	0	0	0	0	0	0	0	0	0	0	0	0	0	0	0	0	0	0	0	0	0	0	0	0	0	0	0	0	0	0	0	0	0	0	0	0	0	0
	d__Bacteria;p__Firmicutes_A;c__Clostridia;o__Oscillospirales;f__Ruminococcaceae;g__Gemmiger;s__Gemmiger_excrementipullorum	Gemmiger_excrementipullorum	0	0	0	0	0	0	0	0	0	0	0	0	1528	67	265	0	0	1302	1557	492	98	160	749	0	0	0	0	0	0	0	0	0	0	0	0	0	0	4750	1027	0	0	2578	0	0	0	1753	1804
	d__Bacteria;p__Bacteroidota;c__Bacteroidia;o__Bacteroidales;f__Marinifilaceae;g__Butyricimonas;s__Butyricimonas_sp003479425	Butyricimonas_sp003479425	0	0	0	0	0	0	0	0	0	0	0	0	0	0	0	0	0	4141	0	0	0	356	0	0	0	0	0	0	0	0	0	0	0	0	0	0	0	0	0	0	0	0	0	0	0	0	0
	d__Bacteria;p__Firmicutes_A;c__Clostridia;o__Oscillospirales;f__Oscillospiraceae;g__NSJ-51;s__NSJ-51_sp910585415	NSJ-51_sp910585415	0	0	0	430	0	0	0	0	0	274	0	0	0	0	0	0	619	1592	0	0	0	0	0	702	2592	0	0	0	0	0	0	0	976	0	0	0	1098	0	0	856	0	0	0	0	0	513	0
	d__Bacteria;p__Firmicutes_A;c__Clostridia;o__Lachnospirales;f__Lachnospiraceae;g__Bariatricus;s__unknown	unknown	0	0	0	0	0	0	0	0	0	0	6046	0	0	1087	0	0	0	0	0	0	0	24655	196	0	0	0	0	0	0	0	0	0	0	0	0	0	0	18636	741	0	0	640	0	0	431	0	0
	d__Bacteria;p__Firmicutes_A;c__Clostridia;o__Lachnospirales;f__Lachnospiraceae;g__Lachnospira;s__Lachnospira_sp900545725	Lachnospira_sp900545725	0	0	0	0	0	0	0	0	0	0	0	0	0	0	0	0	0	0	0	103	0	1670	848	0	0	0	0	0	0	0	0	0	0	0	0	5726	0	0	0	0	0	269	0	0	0	0	0
	d__Bacteria;p__Verrucomicrobiota;c__Verrucomicrobiae;o__Verrucomicrobiales;f__Akkermansiaceae;g__Akkermansia;s__Akkermansia_sp001580195	Akkermansia_sp001580195	0	0	0	0	0	0	0	0	0	0	0	0	0	0	0	0	16357	0	0	0	0	0	0	0	0	0	0	0	0	8235	0	0	6798	0	0	0	0	0	0	0	0	0	0	0	0	0	0
	d__Bacteria;p__Firmicutes_A;c__Clostridia;o__Lachnospirales;f__Lachnospiraceae;g__Blautia_A;s__Blautia_A_sp900548245	Blautia_A_sp900548245	0	0	0	0	0	0	0	0	0	0	3809	0	727	2955	723	195	0	33	1362	1114	0	1312	729	0	0	0	0	0	0	428	0	0	0	0	0	376	33	418	887	0	0	12537	931	0	0	0	0
	d__Bacteria;p__Firmicutes_A;c__Clostridia;o__Lachnospirales;f__Lachnospiraceae;g__Lachnoclostridium_B;s__Lachnoclostridium_B_sp900066555	Lachnoclostridium_B_sp900066555	0	0	0	0	0	0	0	0	0	0	31	0	315	514	909	510	0	874	594	0	464	2618	577	0	0	0	0	0	0	0	0	0	0	0	0	0	0	2172	0	0	0	0	1272	0	0	490	0
	d__Bacteria;p__Firmicutes_A;c__Clostridia;o__Oscillospirales;f__Oscillospiraceae;g__NSJ-51;s__NSJ-51_sp900549795	NSJ-51_sp900549795	0	0	0	132	0	0	0	0	0	492	0	0	0	0	0	0	751	1779	0	0	0	0	0	539	1781	0	0	0	0	0	0	0	586	0	0	0	1271	0	0	725	0	0	0	0	0	658	133
	d__Bacteria;p__Bacteroidota;c__Bacteroidia;o__Bacteroidales;f__Porphyromonadaceae;g__Porphyromonas;s__Porphyromonas_sp900538385	Porphyromonas_sp900538385	0	0	0	0	0	0	0	0	400	0	0	0	0	0	0	0	0	0	0	0	0	35965	0	0	0	0	0	0	0	0	0	0	0	0	0	0	0	0	0	0	0	0	0	0	0	0	0
	d__Bacteria;p__Firmicutes_A;c__Clostridia;o__Lachnospirales;f__Lachnospiraceae;g__Muricomes;s__Muricomes_fissicatena_A	Muricomes_fissicatena_A	0	0	0	0	0	0	0	0	0	0	0	0	0	0	0	0	0	0	0	0	0	0	0	0	0	0	0	0	0	0	0	0	0	0	0	0	1050	0	0	0	0	0	0	0	0	0	0
	d__Bacteria;p__Bacteroidota;c__Bacteroidia;o__Bacteroidales;f__Bacteroidaceae;g__Prevotella;s__Prevotella_sp900547005	Prevotella_sp900547005	0	875	0	0	0	0	0	0	0	0	3559	0	2651	3281	0	0	84	5837	268	750	2689	1683	563	0	0	0	0	0	0	0	0	0	0	0	0	0	302	2558	1235	212	21	0	9330	0	0	0	0
	d__Bacteria;p__Firmicutes_A;c__Clostridia;o__Oscillospirales;f__Oscillospiraceae;g__ER4;s__ER4_sp900552015	ER4_sp900552015	0	0	0	0	0	0	0	0	0	0	17522	0	0	6430	0	0	0	0	9089	0	1590	14271	0	0	0	0	0	0	0	0	0	0	0	0	0	0	0	860	0	0	0	392	0	0	0	0	0
	d__Bacteria;p__Actinobacteriota;c__Actinomycetia;o__Actinomycetales;f__Bifidobacteriaceae;g__Bifidobacterium;s__Bifidobacterium_cebidarum	Bifidobacterium_cebidarum	5407	717	142	644	1336	1154	793	274	1227	2295	0	0	258	0	764	1483	70	600	0	0	357	0	0	1005	0	2708	1480	1034	889	1763	400	485	184	0	801	71	1474	0	0	0	1960	0	112	555	518	661	245
	d__Bacteria;p__Firmicutes_A;c__Clostridia;o__Lachnospirales;f__Lachnospiraceae;g__Blautia_A;s__Blautia_A_sp900551715	Blautia_A_sp900551715	0	0	0	0	0	0	0	0	0	0	559	0	1122	2221	948	0	0	439	243	1761	299	2366	842	0	0	0	0	0	0	803	0	0	0	0	0	502	0	236	5309	0	0	3008	938	0	0	0	0
	d__Bacteria;p__Bacteroidota;c__Bacteroidia;o__Bacteroidales;f__UBA932;g__Cryptobacteroides;s__Cryptobacteroides_sp002438845	Cryptobacteroides_sp002438845	0	0	0	0	0	0	0	0	0	0	4267	0	0	41904	0	0	0	0	0	0	4310	0	638	0	0	0	0	0	0	0	0	0	0	0	0	0	0	0	0	0	0	0	0	0	0	0	0
	d__Bacteria;p__Firmicutes_A;c__Clostridia;o__Lachnospirales;f__Lachnospiraceae;g__Hungatella;s__unknown	unknown	0	0	0	0	0	0	0	0	0	698	0	0	0	0	0	0	0	0	0	0	0	0	0	0	31623	0	0	0	0	0	0	0	0	0	0	900	0	0	0	127	0	282	0	0	0	152	0
	d__Bacteria;p__Actinobacteriota;c__Coriobacteriia;o__Coriobacteriales;f__Eggerthellaceae;g__Gordonibacter;s__Gordonibacter_pamelaeae	Gordonibacter_pamelaeae	0	0	0	0	0	0	0	0	0	0	0	0	0	0	0	0	0	0	0	0	0	0	0	1668	0	0	0	0	0	0	0	0	0	0	0	0	0	0	0	0	0	0	0	0	0	0	0
	d__Bacteria;p__Proteobacteria;c__Gammaproteobacteria;o__Enterobacterales;f__Enterobacteriaceae;g__Plesiomonas;s__Plesiomonas_shigelloides	Plesiomonas_shigelloides	460	0	0	0	0	0	0	0	1469	0	0	0	0	0	0	204	0	0	0	0	0	0	0	0	304	0	0	0	3042	0	0	0	50	673	0	0	0	0	0	0	0	0	0	0	0	0	0
	d__Bacteria;p__Proteobacteria;c__Gammaproteobacteria;o__Enterobacterales;f__Enterobacteriaceae;g__Kluyvera;s__Kluyvera_cryocrescens	Kluyvera_cryocrescens	728	0	0	0	0	73	0	0	1862	0	0	0	0	0	0	252	0	0	0	0	0	0	0	0	0	0	0	0	1216	0	0	0	0	397	0	0	0	0	0	0	0	0	0	0	0	0	0
	d__Bacteria;p__Proteobacteria;c__Gammaproteobacteria;o__Enterobacterales;f__Enterobacteriaceae;g__Citrobacter;s__Citrobacter_sp015672735	Citrobacter_sp015672735	0	0	0	0	0	0	0	0	1001	0	0	0	0	0	0	0	0	0	0	0	0	0	0	0	0	0	0	0	1085	0	0	0	0	0	0	0	0	0	0	0	0	0	0	0	0	0	0
	d__Bacteria;p__Bacteroidota;c__Bacteroidia;o__Bacteroidales;f__Bacteroidaceae;g__Phocaeicola;s__Phocaeicola_barnesiae	Phocaeicola_barnesiae	0	0	0	0	0	0	0	0	0	0	79	0	541	0	202	0	0	0	0	40	0	0	195	244	0	0	0	0	0	0	0	0	0	241	0	0	0	3248	0	853	0	0	0	0	0	1034	277
	d__Bacteria;p__Firmicutes_C;c__Negativicutes;o__Acidaminococcales;f__Acidaminococcaceae;g__Acidaminococcus;s__Acidaminococcus_sp000437815	Acidaminococcus_sp000437815	0	0	0	0	0	0	0	0	0	1511	0	0	132	0	3217	12766	0	0	0	0	0	0	0	0	0	0	0	0	0	0	0	0	20631	0	0	0	0	0	0	5567	754	0	0	0	5071	0	0
	d__Bacteria;p__Firmicutes_A;c__Clostridia;o__Oscillospirales;f__Oscillospiraceae;g__CAG-170;s__CAG-170_sp900549635	CAG-170_sp900549635	0	0	0	0	0	0	0	0	0	0	549	0	0	32883	0	0	0	0	3653	0	797	6328	0	0	0	0	0	0	0	0	0	0	0	0	0	0	0	0	0	0	0	0	0	0	0	0	0
	d__Bacteria;p__Firmicutes_A;c__Clostridia;o__Oscillospirales;f__Ruminococcaceae;g__Ruminococcus_D;s__Ruminococcus_D_sp900539095	Ruminococcus_D_sp900539095	0	0	0	0	0	0	0	0	0	0	0	0	0	0	0	0	0	0	0	1455	0	0	0	0	0	0	0	0	0	0	0	0	0	0	0	0	0	0	0	0	0	9445	0	0	0	0	0
	d__Bacteria;p__Firmicutes_C;c__Negativicutes;o__Selenomonadales;f__Selenomonadaceae;g__Megamonas;s__unknown	unknown	0	0	0	0	0	0	0	0	0	0	0	0	0	0	0	0	0	0	0	1266	0	0	385	0	0	0	0	0	0	0	0	0	0	0	0	0	0	261	0	0	0	0	0	0	0	0	0
	d__Bacteria;p__Firmicutes_A;c__Clostridia;o__Lachnospirales;f__Lachnospiraceae;g__Blautia_A;s__Blautia_A_sp900763175	Blautia_A_sp900763175	0	60	0	15	0	0	0	0	0	137	301	0	60	598	15	306	0	184	30	120	0	414	202	0	0	0	0	0	0	323	0	0	0	0	0	30	212	429	564	0	0	393	319	30	0	153	0
	d__Bacteria;p__Firmicutes_A;c__Clostridia;o__Lachnospirales;f__Lachnospiraceae;g__Eisenbergiella;s__Eisenbergiella_sp900539715	Eisenbergiella_sp900539715	0	0	0	35781	0	0	0	0	0	0	0	0	0	0	0	0	0	0	0	0	0	0	0	0	0	0	0	0	0	0	0	0	0	0	0	0	0	0	0	0	0	0	0	5129	0	0	0
	d__Bacteria;p__Firmicutes_A;c__Clostridia;o__Lachnospirales;f__Lachnospiraceae;g__Acetatifactor;s__Acetatifactor_sp900760705	Acetatifactor_sp900760705	0	0	0	0	0	0	0	0	0	0	978	0	575	688	0	0	0	0	1626	600	0	1244	1324	0	0	0	0	0	0	0	0	0	0	0	0	0	0	96	0	0	0	2960	0	0	0	1289	1700
	d__Bacteria;p__Desulfobacterota_I;c__Desulfovibrionia;o__Desulfovibrionales;f__Desulfovibrionaceae;g__Bilophila;s__Bilophila_faecipullorum	Bilophila_faecipullorum	0	0	0	0	0	0	0	0	0	0	1045	0	0	0	0	0	0	0	0	1556	0	1593	99	3016	0	0	0	0	0	0	2299	0	0	0	0	0	1330	0	458	0	0	0	0	0	0	3273	340
	d__Bacteria;p__Bacteroidota;c__Bacteroidia;o__Bacteroidales;f__Barnesiellaceae;g__CABJAA01;s__CABJAA01_sp003150885	CABJAA01_sp003150885	0	0	0	0	0	0	0	0	0	0	0	0	0	0	0	0	0	0	0	0	0	0	0	0	0	0	0	0	0	0	0	0	0	0	0	0	0	0	0	0	0	0	0	0	0	0	0
	d__Bacteria;p__Bacteroidota;c__Bacteroidia;o__Bacteroidales;f__Bacteroidaceae;g__Prevotella;s__Prevotella_sp002251365	Prevotella_sp002251365	0	732	0	0	0	0	0	0	0	0	3446	0	3644	3370	0	0	0	4415	109	137	1440	861	660	0	0	0	0	0	0	0	0	0	0	0	0	0	397	2063	521	55	26	0	8759	0	0	0	0
	d__Bacteria;p__Proteobacteria;c__Gammaproteobacteria;o__Enterobacterales;f__Enterobacteriaceae;g__Lelliottia;s__Lelliottia_sp009668015	Lelliottia_sp009668015	23	0	0	0	0	0	0	0	114	0	0	0	0	0	0	114	0	0	0	0	0	0	0	0	480	0	0	0	3971	0	0	0	0	254	0	0	0	0	0	0	0	0	0	0	0	0	0
	d__Bacteria;p__Firmicutes;c__Bacilli;o__RF39;f__UBA660;g__CAG-302;s__CAG-302_sp900543825	CAG-302_sp900543825	0	0	0	0	0	0	0	0	0	0	0	0	0	1416	0	0	0	0	0	0	383	46192	0	0	0	0	0	0	0	0	0	0	0	0	0	0	0	0	0	0	0	0	0	0	0	0	0
	d__Bacteria;p__Fusobacteriota;c__Fusobacteriia;o__Fusobacteriales;f__Fusobacteriaceae;g__Fusobacterium;s__Fusobacterium_animalis	Fusobacterium_animalis	0	0	518	0	0	58	0	0	0	0	0	0	0	0	0	1117	1241	0	0	0	0	0	0	0	0	0	0	7305	0	0	2650	8417	0	0	0	0	0	0	0	1508	57	0	0	6760	9514	195	0
	d__Bacteria;p__Proteobacteria;c__Gammaproteobacteria;o__Enterobacterales;f__Enterobacteriaceae;g__Superficieibacter;s__Superficieibacter_electus	Superficieibacter_electus	0	302	137	0	357	0	193	0	1966	110	0	82	82	0	0	493	193	0	0	0	0	0	0	0	906	0	357	388	1206	0	385	816	359	1255	0	0	0	0	0	412	0	0	0	973	0	0	0
	d__Bacteria;p__Actinobacteriota;c__Actinomycetia;o__Actinomycetales;f__Actinomycetaceae;g__Pauljensenia;s__Pauljensenia_sp900541895	Pauljensenia_sp900541895	9947	0	9093	0	8874	0	0	0	0	1823	0	0	0	0	0	456	0	0	0	0	0	0	0	0	0	8491	7956	0	472	0	0	0	0	0	0	0	0	0	0	0	0	0	0	507	0	0	0
	d__Bacteria;p__Firmicutes_A;c__Clostridia;o__Lachnospirales;f__Lachnospiraceae;g__Roseburia;s__Roseburia_sp001940165	Roseburia_sp001940165	0	0	0	0	0	0	0	0	0	0	811	0	402	972	0	0	0	0	1206	945	89	504	8592	0	0	0	0	0	0	0	0	0	0	0	0	845	0	548	292	0	0	859	0	0	0	0	0
	d__Bacteria;p__Proteobacteria;c__Gammaproteobacteria;o__Enterobacterales;f__Enterobacteriaceae;g__Lelliottia;s__Lelliottia_jeotgali	Lelliottia_jeotgali	0	0	0	0	0	0	0	0	312	0	0	0	0	0	0	102	0	0	0	0	0	0	0	0	0	0	0	0	3101	0	0	0	0	0	0	0	0	0	0	0	0	0	0	0	0	0	0
	d__Bacteria;p__Firmicutes_A;c__Clostridia;o__Oscillospirales;f__Acutalibacteraceae;g__Eubacterium_R;s__Eubacterium_R_sp900540235	Eubacterium_R_sp900540235	0	0	0	0	0	0	0	0	0	0	0	0	0	222	0	0	0	0	0	0	3514	4755	0	0	0	0	0	0	0	0	0	0	0	0	0	0	0	0	0	0	0	0	0	0	0	0	0
	d__Bacteria;p__Bacteroidota;c__Bacteroidia;o__Bacteroidales;f__Marinifilaceae;g__Butyricimonas;s__Butyricimonas_virosa	Butyricimonas_virosa	0	0	0	0	0	0	0	0	0	0	0	0	0	3859	0	0	0	1045	0	0	95	0	0	0	0	0	0	0	0	0	0	0	0	0	0	0	0	0	0	0	0	0	0	0	0	0	0
	d__Bacteria;p__Firmicutes_A;c__Clostridia;o__Oscillospirales;f__Oscillospiraceae;g__CAG-83;s__CAG-83_sp900551995	CAG-83_sp900551995	0	0	0	0	0	0	0	0	0	0	5601	0	0	1051	0	0	0	0	32537	0	0	4050	0	0	0	0	0	0	0	0	0	0	0	0	0	0	0	3682	0	0	0	0	0	0	0	0	0
	d__Bacteria;p__Firmicutes;c__Bacilli;o__Lactobacillales;f__Lactobacillaceae;g__Limosilactobacillus;s__Limosilactobacillus_fermentum	Limosilactobacillus_fermentum	0	0	0	0	0	1013	0	0	0	0	0	3782	0	0	0	0	0	0	0	0	0	0	0	1763	0	0	0	0	0	0	0	1332	0	0	0	0	0	0	0	0	0	0	0	7983	30784	0	0
	d__Bacteria;p__Firmicutes;c__Bacilli;o__Lactobacillales;f__Streptococcaceae;g__Streptococcus;s__Streptococcus_lutetiensis	Streptococcus_lutetiensis	0	0	0	0	0	0	0	0	0	0	0	0	0	0	0	0	0	0	0	0	0	0	0	0	5661	0	0	0	0	0	0	0	0	0	0	0	0	0	0	0	0	0	0	0	0	0	0
	d__Bacteria;p__Firmicutes_A;c__Clostridia;o__Lachnospirales;f__Lachnospiraceae;g__Agathobacter;s__Agathobacter_sp900316805	Agathobacter_sp900316805	0	0	0	0	0	0	0	0	0	0	666	0	657	1064	0	126	0	0	714	275	0	322	3554	0	0	0	0	0	0	0	0	0	0	0	0	634	0	95	110	0	0	322	0	0	0	0	0
	d__Bacteria;p__Firmicutes_C;c__Negativicutes;o__Acidaminococcales;f__Acidaminococcaceae;g__Acidaminococcus;s__Acidaminococcus_sp905213155	Acidaminococcus_sp905213155	0	0	0	0	0	0	0	0	0	300	0	0	0	0	819	4025	122	0	0	0	0	0	0	0	0	0	0	0	0	0	0	0	558	0	0	0	0	0	0	38914	223	0	0	0	1070	0	0
	d__Bacteria;p__Firmicutes_A;c__Clostridia;o__Lachnospirales;f__Lachnospiraceae;g__Clostridium_AP;s__Clostridium_AP_scindens	Clostridium_AP_scindens	0	0	0	0	0	0	0	0	0	0	0	0	0	0	0	0	5930	0	0	0	0	0	0	0	0	0	0	0	0	0	0	0	0	0	0	0	0	0	0	0	0	0	0	0	0	325	310
	d__Bacteria;p__Firmicutes_A;c__Clostridia;o__Lachnospirales;f__Lachnospiraceae;g__Blautia;s__Blautia_coccoides	Blautia_coccoides	0	0	0	0	0	0	0	0	0	0	0	0	0	0	0	0	0	0	0	0	0	0	0	0	0	0	0	0	0	0	0	0	0	0	0	0	0	0	0	0	0	0	0	0	0	0	824
	d__Bacteria;p__Bacteroidota;c__Bacteroidia;o__Bacteroidales;f__Rikenellaceae;g__Alistipes;s__Alistipes_senegalensis	Alistipes_senegalensis	0	0	0	0	0	0	0	0	0	0	0	0	0	4963	0	0	0	0	0	0	0	4068	0	0	0	0	0	0	0	0	0	0	0	0	0	0	0	4111	0	0	0	0	0	0	0	511	4019
	d__Bacteria;p__Firmicutes_A;c__Clostridia;o__TANB77;f__CAG-508;g__CAG-269;s__CAG-269_sp000431335	CAG-269_sp000431335	0	0	0	0	0	0	0	0	0	0	0	0	0	15319	0	0	0	0	0	0	0	296	0	0	0	0	0	0	0	0	0	0	0	0	0	0	0	0	0	0	0	28768	0	0	0	0	0
	d__Bacteria;p__Bacteroidota;c__Bacteroidia;o__Bacteroidales;f__Rikenellaceae;g__Alistipes;s__unknown	unknown	0	0	0	0	0	0	0	0	0	0	0	0	281	251	295	0	0	0	42	841	0	5343	0	0	0	0	0	0	0	0	0	0	0	0	0	0	0	1897	0	0	0	0	0	0	0	2627	8775
	d__Bacteria;p__Firmicutes_A;c__Clostridia;o__Oscillospirales;f__Oscillospiraceae;g__CAG-103;s__CAG-103_sp000432375	CAG-103_sp000432375	0	0	0	0	0	0	0	0	0	0	5398	0	0	2727	28117	0	0	0	0	0	0	0	0	0	0	0	0	0	0	0	0	0	0	0	0	0	0	0	0	0	0	3452	0	0	0	0	0
	d__Bacteria;p__Bacteroidota;c__Bacteroidia;o__Bacteroidales;f__Bacteroidaceae;g__Bacteroides;s__Bacteroides_caecimuris	Bacteroides_caecimuris	0	1369	0	0	0	0	0	0	0	0	4374	0	1643	1089	157	0	0	403	0	2394	0	6335	0	0	0	0	0	0	0	0	0	0	0	0	0	0	147	0	393	80	0	0	0	0	0	674	0
	d__Bacteria;p__Bacteroidota;c__Bacteroidia;o__Bacteroidales;f__Bacteroidaceae;g__Prevotella;s__Prevotella_avicola	Prevotella_avicola	0	563	0	0	0	0	0	0	0	0	3292	0	2035	1872	0	0	0	2673	366	454	1224	1205	1321	0	0	0	0	0	0	0	0	0	0	0	0	0	131	3653	3429	369	284	0	6632	0	0	0	0
	d__Bacteria;p__Firmicutes_A;c__Clostridia;o__Lachnospirales;f__Lachnospiraceae;g__CAG-95;s__CAG-95_sp000438155	CAG-95_sp000438155	0	0	0	0	0	0	0	0	0	0	0	0	0	12424	0	0	0	0	12708	0	0	2192	0	0	0	0	0	0	0	0	0	0	0	0	0	0	0	0	0	0	0	17098	0	0	0	0	0
	d__Bacteria;p__Firmicutes_A;c__Clostridia;o__Oscillospirales;f__Oscillospiraceae;g__CAG-170;s__CAG-170_sp002404795	CAG-170_sp002404795	0	0	0	0	0	0	0	0	0	0	0	0	0	2520	5228	0	0	0	0	0	0	0	0	0	0	0	0	0	0	0	0	0	0	0	0	0	0	0	0	0	0	0	0	0	0	0	0
	d__Bacteria;p__Actinobacteriota;c__Actinomycetia;o__Actinomycetales;f__Bifidobacteriaceae;g__Bifidobacterium;s__Bifidobacterium_pullorum_C	Bifidobacterium_pullorum_C	494	1002	142	1107	2146	1159	1975	47	1062	2796	0	433	276	0	1436	2258	188	772	0	0	507	0	0	813	0	236	3086	1553	2012	415	563	494	345	0	295	11	1411	0	95	137	1916	0	177	556	368	287	186
	d__Bacteria;p__Firmicutes_C;c__Negativicutes;o__Acidaminococcales;f__Acidaminococcaceae;g__Acidaminococcus;s__Acidaminococcus_sp900770265	Acidaminococcus_sp900770265	0	0	0	0	0	0	0	0	0	0	0	0	0	0	4131	2482	0	0	0	0	0	0	0	0	0	0	0	0	0	0	0	0	564	0	0	0	0	0	0	35225	0	0	0	0	970	0	0
	d__Bacteria;p__Cyanobacteria;c__Vampirovibrionia;o__Gastranaerophilales;f__Gastranaerophilaceae;g__Stercorousia;s__Stercorousia_sp900556295	Stercorousia_sp900556295	0	0	0	0	0	0	0	0	0	0	12189	0	0	2506	0	0	0	0	0	0	14460	0	0	0	0	0	0	0	0	0	0	0	0	0	0	0	0	1555	0	0	0	0	0	0	0	0	0
	d__Bacteria;p__Proteobacteria;c__Gammaproteobacteria;o__Enterobacterales;f__Pasteurellaceae;g__Haemophilus_A;s__Haemophilus_A_parahaemolyticus	Haemophilus_A_parahaemolyticus	0	19647	0	0	0	0	0	0	0	0	0	3308	0	0	0	0	0	0	0	0	0	0	0	0	0	0	0	0	0	0	0	0	17733	0	0	661	0	0	0	0	0	0	0	0	0	0	0
	d__Bacteria;p__Firmicutes_C;c__Negativicutes;o__Acidaminococcales;f__Acidaminococcaceae;g__Phascolarctobacterium_A;s__Phascolarctobacterium_A_sp900551335	Phascolarctobacterium_A_sp900551335	0	0	0	0	0	0	0	0	0	0	19509	0	0	12959	0	0	0	0	6121	0	0	0	0	88	0	0	0	0	0	0	0	0	0	0	0	0	0	0	0	0	0	0	0	0	0	0	0
	d__Bacteria;p__Actinobacteriota;c__Actinomycetia;o__Actinomycetales;f__Bifidobacteriaceae;g__Bifidobacterium;s__Bifidobacterium_hapali	Bifidobacterium_hapali	534	1649	33	568	934	487	853	0	619	1613	0	77	863	0	1611	992	166	1454	0	0	1296	0	11	459	0	540	1361	831	750	324	344	123	247	0	67	78	594	209	221	0	4443	0	262	269	166	122	209
	d__Bacteria;p__Bacteroidota;c__Bacteroidia;o__Bacteroidales;f__Bacteroidaceae;g__Prevotella;s__Prevotella_sp000424185	Prevotella_sp000424185	0	547	0	0	0	0	0	0	0	0	3302	0	1477	1713	0	0	102	2375	340	1145	1184	912	917	0	0	0	0	0	0	0	0	0	0	0	0	0	132	3589	2986	463	372	0	4923	0	0	30	0
	d__Bacteria;p__Firmicutes;c__Bacilli;o__Staphylococcales;f__Staphylococcaceae;g__Staphylococcus;s__Staphylococcus_argenteus	Staphylococcus_argenteus	3006	0	18719	0	0	0	0	0	0	0	0	0	0	0	0	0	0	0	0	0	0	0	0	0	0	14777	0	0	0	0	0	0	0	0	0	0	0	0	0	0	0	0	0	0	0	0	0
	d__Bacteria;p__Firmicutes_A;c__Clostridia;o__Lachnospirales;f__Lachnospiraceae;g__CAG-317;s__CAG-317_sp000433215	CAG-317_sp000433215	0	0	0	0	0	0	0	0	0	98	490	0	1679	862	0	3159	0	298	24	442	25	372	2105	0	0	0	0	0	0	353	586	0	434	0	0	0	604	641	444	0	0	410	248	223	0	2732	25
	d__Bacteria;p__Actinobacteriota;c__Actinomycetia;o__Actinomycetales;f__Bifidobacteriaceae;g__Bifidobacterium;s__Bifidobacterium_choloepi	Bifidobacterium_choloepi	715	836	101	882	1112	782	900	40	789	1796	0	261	436	0	715	1424	130	887	0	0	478	0	0	484	0	617	1157	943	989	333	299	239	202	0	71	60	960	0	191	101	1921	0	179	669	337	220	250
	d__Bacteria;p__Actinobacteriota;c__Actinomycetia;o__Actinomycetales;f__Actinomycetaceae;g__Pauljensenia;s__Pauljensenia_sp001838165	Pauljensenia_sp001838165	11575	0	0	0	15916	0	1389	0	0	0	0	0	0	0	0	0	0	0	0	0	0	0	0	0	0	0	7234	0	833	0	0	0	0	0	0	0	0	0	0	0	0	0	0	1277	0	0	0
	d__Bacteria;p__Firmicutes;c__Bacilli;o__Staphylococcales;f__Staphylococcaceae;g__Staphylococcus;s__Staphylococcus_schweitzeri	Staphylococcus_schweitzeri	1599	0	32124	0	0	0	0	0	0	0	0	0	0	0	0	0	0	0	0	0	0	0	0	0	0	3198	0	0	0	0	0	0	0	0	0	0	0	0	0	0	0	0	0	0	0	0	0
	d__Bacteria;p__Firmicutes_A;c__Clostridia;o__Eubacteriales;f__Eubacteriaceae;g__Eubacterium;s__Eubacterium_maltosivorans	Eubacterium_maltosivorans	0	0	0	6964	0	0	0	11433	0	0	0	0	0	0	0	0	0	0	0	0	0	0	158	0	0	0	0	0	0	0	0	0	0	0	0	0	3281	0	0	0	0	0	0	0	0	0	0
	d__Bacteria;p__Proteobacteria;c__Gammaproteobacteria;o__Enterobacterales;f__Pasteurellaceae;g__Haemophilus_D;s__Haemophilus_D_pittmaniae	Haemophilus_D_pittmaniae	0	804	987	0	238	0	0	0	0	0	0	516	0	0	0	0	0	0	0	0	0	0	962	0	0	603	0	0	0	0	0	0	0	0	0	0	0	0	0	801	92	0	24	0	0	0	0
	d__Bacteria;p__Actinobacteriota;c__Actinomycetia;o__Actinomycetales;f__Bifidobacteriaceae;g__Pseudoscardovia;s__Pseudoscardovia_radai	Pseudoscardovia_radai	555	867	22	550	2362	1068	1320	45	917	2988	0	518	373	0	1010	2198	135	934	0	0	482	0	0	671	0	744	2277	1485	1547	270	376	327	272	0	383	56	1229	0	113	204	1746	0	288	721	453	203	195
	d__Bacteria;p__Firmicutes_A;c__Clostridia;o__Oscillospirales;f__Acutalibacteraceae;g__Ruminococcus_E;s__Ruminococcus_E_sp902766885	Ruminococcus_E_sp902766885	0	0	0	0	0	0	0	0	0	0	49	0	0	690	0	0	0	0	0	825	0	0	0	0	0	0	0	0	0	0	0	0	0	0	0	0	0	1507	2385	0	0	572	0	0	0	0	50
	d__Bacteria;p__Proteobacteria;c__Gammaproteobacteria;o__Burkholderiales;f__Burkholderiaceae;g__Sutterella;s__Sutterella_sp900764215	Sutterella_sp900764215	0	0	0	0	0	0	0	0	0	0	0	0	0	0	0	0	0	0	0	0	0	0	0	0	0	0	0	0	0	0	0	0	0	0	0	0	0	528	0	0	0	0	0	0	0	0	0
	d__Bacteria;p__Actinobacteriota;c__Actinomycetia;o__Actinomycetales;f__Actinomycetaceae;g__Varibaculum;s__Varibaculum_cambriense_A	Varibaculum_cambriense_A	0	0	0	0	0	759	0	0	0	1439	0	0	0	0	0	0	0	0	0	0	0	0	0	0	0	0	0	0	0	1389	0	0	0	0	0	0	0	0	0	0	0	0	0	0	0	0	0
	d__Bacteria;p__Firmicutes_A;c__Clostridia;o__Lachnospirales;f__Lachnospiraceae;g__Lachnospira;s__unknown	unknown	0	0	0	0	0	0	0	0	0	0	0	0	0	49	0	0	0	0	0	0	0	0	366	0	0	0	0	0	0	0	0	0	0	0	0	4395	0	0	116	0	0	304	0	0	0	0	0
	d__Bacteria;p__Bacteroidota;c__Bacteroidia;o__Bacteroidales;f__Bacteroidaceae;g__Prevotella;s__Prevotella_sp002353555	Prevotella_sp002353555	0	712	0	0	0	0	0	0	0	0	2980	0	1703	2408	0	0	55	3191	367	866	1454	802	748	0	0	0	0	0	0	0	0	0	0	0	0	0	154	1970	2472	440	225	0	6544	0	0	0	0
	d__Bacteria;p__Proteobacteria;c__Gammaproteobacteria;o__Enterobacterales;f__Pasteurellaceae;g__Haemophilus_A;s__Haemophilus_A_paraphrohaemolyticus	Haemophilus_A_paraphrohaemolyticus	0	14397	0	0	0	0	0	0	0	0	0	3097	0	0	0	0	0	0	0	76	0	0	0	0	0	0	0	0	0	0	0	0	5313	0	0	2716	0	0	0	394	0	0	0	0	0	0	0
	d__Bacteria;p__Firmicutes_A;c__Clostridia;o__Lachnospirales;f__Lachnospiraceae;g__Roseburia;s__Roseburia_sp905206195	Roseburia_sp905206195	0	0	0	0	0	0	0	0	0	0	754	0	611	186	0	0	0	0	183	1613	0	186	8035	0	0	0	0	0	0	0	0	0	0	0	0	7016	0	1965	0	0	0	581	0	0	0	0	0
	d__Bacteria;p__Actinobacteriota;c__Actinomycetia;o__Actinomycetales;f__Bifidobacteriaceae;g__Bifidobacterium;s__Bifidobacterium_thermophilum	Bifidobacterium_thermophilum	0	1400	0	474	1453	1125	1136	0	1070	2431	0	216	575	0	1762	1947	240	1311	0	0	749	0	0	450	0	269	1510	1042	1332	217	137	108	238	0	0	0	997	0	159	27	2968	0	136	592	287	182	27
	d__Bacteria;p__Proteobacteria;c__Gammaproteobacteria;o__Enterobacterales;f__Enterobacteriaceae;g__1-19;s__1-19_sp001922585	1-19_sp001922585	627	0	0	0	0	140	0	0	127	0	0	0	0	0	0	47	0	0	0	0	0	0	0	0	0	0	0	0	1479	0	0	0	0	206	0	0	0	0	0	0	0	0	0	0	0	0	0
	d__Bacteria;p__Actinobacteriota;c__Coriobacteriia;o__Coriobacteriales;f__Eggerthellaceae;g__Eggerthella;s__Eggerthella_sinensis	Eggerthella_sinensis	0	0	0	0	0	0	0	0	9339	1539	0	0	0	0	0	1370	1043	0	0	0	0	0	0	599	0	0	0	0	0	1321	0	0	0	0	0	0	1768	0	0	0	0	0	0	0	734	0	0
	d__Bacteria;p__Bacteroidota;c__Bacteroidia;o__Bacteroidales;f__UBA932;g__Cryptobacteroides;s__Cryptobacteroides_sp002321335	Cryptobacteroides_sp002321335	0	0	0	0	0	0	0	0	0	0	4189	0	0	29541	0	0	0	0	0	0	3560	0	558	0	0	0	0	0	0	0	0	0	0	0	0	0	0	0	0	0	0	0	0	0	0	0	0
	d__Bacteria;p__Firmicutes_A;c__Clostridia;o__Oscillospirales;f__Oscillospiraceae;g__Dysosmobacter;s__Dysosmobacter_sp900542115	Dysosmobacter_sp900542115	0	0	0	0	0	0	0	0	0	0	4423	0	0	3118	0	0	0	0	494	5385	731	4987	1537	0	0	0	0	0	0	0	0	0	0	0	0	0	0	1054	0	0	0	760	0	0	0	0	0
	d__Bacteria;p__Proteobacteria;c__Gammaproteobacteria;o__Enterobacterales;f__Enterobacteriaceae;g__Sodalis_A;s__Sodalis_A_praecaptivus	Sodalis_A_praecaptivus	303	0	0	0	0	101	0	0	249	0	0	0	0	0	0	201	0	0	0	0	0	0	0	0	0	0	0	0	1659	0	0	0	0	252	0	0	0	0	0	0	0	0	0	0	0	0	0
	d__Bacteria;p__Firmicutes_A;c__Clostridia;o__Christensenellales;f__Borkfalkiaceae;g__UBA7597;s__UBA7597_sp900542935	UBA7597_sp900542935	0	0	0	0	0	0	0	0	0	0	12895	0	0	22619	0	0	0	0	0	0	0	1594	0	0	0	0	0	0	0	0	0	0	0	0	0	0	0	0	0	0	0	0	0	0	0	0	0
	d__Bacteria;p__Firmicutes_A;c__Clostridia;o__Oscillospirales;f__Oscillospiraceae;g__Evtepia;s__Evtepia_sp004556345	Evtepia_sp004556345	0	0	0	0	0	0	0	0	0	0	545	0	0	0	8849	0	1821	0	0	0	0	16735	2082	0	0	0	0	0	0	0	0	0	0	0	0	0	0	5205	0	0	0	0	0	0	0	0	0
	d__Bacteria;p__Proteobacteria;c__Gammaproteobacteria;o__Enterobacterales;f__Enterobacteriaceae;g__Kosakonia;s__Kosakonia_oryzendophytica	Kosakonia_oryzendophytica	47	118	0	0	47	0	94	0	947	0	0	0	47	0	0	261	0	0	0	0	0	0	0	0	308	0	285	236	1575	0	237	235	379	814	0	0	0	0	0	168	0	0	0	191	0	0	0
	d__Bacteria;p__Proteobacteria;c__Gammaproteobacteria;o__Enterobacterales;f__Enterobacteriaceae;g__Kluyvera;s__Kluyvera_georgiana_A	Kluyvera_georgiana_A	0	0	0	0	0	0	0	0	33803	0	0	0	0	0	0	0	0	0	0	0	0	0	0	0	0	0	0	0	0	0	0	0	417	0	0	0	0	0	0	0	0	0	0	0	0	0	0
	d__Bacteria;p__Firmicutes_C;c__Negativicutes;o__Acidaminococcales;f__Acidaminococcaceae;g__Acidaminococcus;s__Acidaminococcus_provencensis	Acidaminococcus_provencensis	0	0	0	0	0	0	0	0	0	1422	0	0	138	0	3486	13100	448	0	0	0	0	0	0	0	0	0	0	0	0	0	455	0	2994	0	0	0	0	0	0	8950	883	0	0	0	4755	0	0
	d__Bacteria;p__Proteobacteria;c__Gammaproteobacteria;o__Enterobacterales;f__Enterobacteriaceae;g__Salmonella;s__Salmonella_bongori	Salmonella_bongori	0	0	0	0	0	0	0	0	1001	0	0	0	0	0	0	0	0	0	0	0	0	0	0	0	0	0	0	0	561	0	91	636	0	1578	0	0	0	0	0	233	0	0	0	324	0	0	0
	d__Bacteria;p__Firmicutes_A;c__Clostridia;o__Lachnospirales;f__Lachnospiraceae;g__Oliverpabstia;s__Oliverpabstia_faecicola	Oliverpabstia_faecicola	0	0	0	0	0	0	0	0	0	0	0	0	0	3046	0	0	0	0	0	0	0	0	0	0	0	0	0	0	0	0	0	0	0	0	0	0	0	16506	8464	0	0	224	0	0	0	0	0
	d__Bacteria;p__Firmicutes_A;c__Clostridia;o__Clostridiales;f__Clostridiaceae;g__Clostridium_P;s__Clostridium_P_ventriculi	Clostridium_P_ventriculi	0	0	0	0	0	0	0	0	0	0	0	0	0	16199	0	0	0	0	0	333	0	4318	7463	0	1524	0	0	0	0	0	0	0	0	0	0	0	0	0	0	0	0	0	633	0	0	0	0
	d__Bacteria;p__Firmicutes_A;c__Clostridia;o__Oscillospirales;f__Oscillospiraceae;g__Evtepia;s__Evtepia_gabavorous	Evtepia_gabavorous	0	0	0	0	0	0	0	0	0	0	0	0	0	2266	0	0	0	0	0	0	0	0	0	0	0	0	0	0	0	1797	0	0	0	0	0	0	0	0	0	0	0	2308	0	0	0	4454	7403
	d__Bacteria;p__Firmicutes_A;c__Clostridia;o__Peptostreptococcales;f__Anaerovoracaceae;g__Alangreenwoodia;s__Alangreenwoodia_sp905206455	Alangreenwoodia_sp905206455	0	0	0	0	0	0	0	0	0	0	6258	0	0	0	1404	0	0	7776	2267	0	0	10668	0	0	0	0	0	0	0	0	0	0	0	0	0	0	0	7326	0	0	0	0	0	0	0	545	0
	d__Bacteria;p__Firmicutes;c__Bacilli;o__Lactobacillales;f__Lactobacillaceae;g__Lactobacillus;s__Lactobacillus_hominis	Lactobacillus_hominis	0	0	1330	0	0	1119	3742	0	0	0	0	5008	0	0	0	0	0	0	0	0	0	0	0	0	0	1080	0	0	0	0	0	20851	0	0	0	0	0	0	0	0	0	0	0	0	2210	0	0
	d__Bacteria;p__Bacteroidota;c__Bacteroidia;o__Bacteroidales;f__Bacteroidaceae;g__Prevotella;s__Prevotella_sp900557405	Prevotella_sp900557405	0	0	0	0	0	0	0	0	0	0	1869	0	1003	1468	0	0	0	3215	0	0	11340	258	0	0	0	0	0	0	0	0	0	0	0	0	0	0	0	366	37	0	0	0	4500	0	0	0	0
	d__Bacteria;p__Firmicutes_A;c__Clostridia;o__Lachnospirales;f__Anaerotignaceae;g__;s__unknown	unknown	0	0	0	0	0	0	0	0	0	0	0	0	0	0	0	0	0	0	0	0	0	0	0	0	0	0	0	0	0	0	0	0	0	0	0	0	0	0	0	0	0	0	0	0	0	0	0
	d__Bacteria;p__Bacteroidota;c__Bacteroidia;o__Bacteroidales;f__Bacteroidaceae;g__Prevotella;s__Prevotella_sp900543585	Prevotella_sp900543585	0	109	0	0	0	0	0	0	0	0	3325	0	1403	1186	0	0	0	2498	0	0	2416	565	389	0	0	0	0	0	0	0	0	0	0	0	0	0	0	1967	727	0	0	0	5572	0	0	0	0
	d__Bacteria;p__Actinobacteriota;c__Actinomycetia;o__Actinomycetales;f__Bifidobacteriaceae;g__Bifidobacterium;s__Bifidobacterium_canis	Bifidobacterium_canis	0	209	0	376	0	0	52	0	401	207	0	0	153	0	235	157	0	411	0	0	52	0	0	0	0	0	0	26	0	0	0	0	0	0	0	0	0	0	0	0	308	0	0	0	0	0	0
	d__Bacteria;p__Firmicutes_A;c__Clostridia;o__Lachnospirales;f__Lachnospiraceae;g__Blautia;s__Blautia_sp001304935	Blautia_sp001304935	0	0	0	0	0	0	0	0	0	0	0	0	0	0	0	0	0	0	0	0	0	0	0	0	0	0	0	0	0	0	0	0	0	0	0	0	0	0	0	0	0	0	0	0	0	0	0
	d__Bacteria;p__Proteobacteria;c__Gammaproteobacteria;o__Enterobacterales;f__Succinivibrionaceae;g__Succinivibrio;s__unknown	unknown	0	0	0	0	0	0	0	0	0	0	0	0	0	24	0	0	0	0	0	0	0	10321	0	0	0	0	0	0	0	0	0	0	0	0	0	0	0	0	0	0	0	0	0	0	0	0	0
	d__Bacteria;p__Proteobacteria;c__Gammaproteobacteria;o__Enterobacterales;f__Enterobacteriaceae;g__Scandinavium;s__Scandinavium_sp014156375	Scandinavium_sp014156375	162	20	20	0	60	0	40	0	824	0	0	0	0	0	0	492	0	0	0	0	0	0	0	0	244	0	80	61	2011	0	203	60	243	426	0	0	0	0	0	81	0	0	0	0	0	0	0
	d__Bacteria;p__Firmicutes_A;c__Clostridia;o__Peptostreptococcales;f__Anaerovoracaceae;g__Copromorpha;s__Copromorpha_sp900549125	Copromorpha_sp900549125	0	0	0	0	0	0	0	0	0	0	0	0	2103	2169	5310	4946	0	5449	0	139	28	6441	0	0	0	0	0	0	0	0	0	0	0	0	0	0	1177	2012	308	0	0	0	191	0	0	523	322
	d__Bacteria;p__Bacteroidota;c__Bacteroidia;o__Bacteroidales;f__Rikenellaceae;g__Alistipes;s__Alistipes_sp015059925	Alistipes_sp015059925	0	0	0	0	0	0	0	0	0	0	0	0	158	177	576	0	0	345	0	2275	0	1358	9	0	0	0	0	0	0	0	0	0	0	0	0	0	0	1362	0	0	0	0	0	0	0	1484	5463
	d__Bacteria;p__Proteobacteria;c__Gammaproteobacteria;o__Enterobacterales;f__Enterobacteriaceae;g__Erwinia;s__Erwinia_sp000599885	Erwinia_sp000599885	0	0	0	0	0	0	0	0	127	0	0	0	0	0	0	55	0	0	0	0	0	0	0	0	0	0	0	0	476	0	0	0	0	255	0	0	0	0	0	0	0	0	0	0	0	0	0
	d__Bacteria;p__Bacteroidota;c__Bacteroidia;o__Bacteroidales;f__Bacteroidaceae;g__Prevotella;s__Prevotella_sp900315635	Prevotella_sp900315635	0	350	0	0	0	0	0	0	0	0	3077	0	1379	2023	0	0	0	2718	231	314	1095	769	557	0	0	0	0	0	0	0	0	0	0	0	0	0	164	2784	1465	185	337	0	6271	0	0	16	0
	d__Bacteria;p__Firmicutes_A;c__Clostridia;o__Lachnospirales;f__Lachnospiraceae;g__Choladocola;s__Choladocola_sp003481535	Choladocola_sp003481535	0	0	0	0	0	0	0	0	0	0	2080	0	0	4117	0	0	0	0	1181	852	471	3093	3871	0	0	0	0	0	0	0	0	0	0	0	0	0	0	2337	3726	0	0	545	0	0	0	4717	0
	d__Bacteria;p__Actinobacteriota;c__Actinomycetia;o__Actinomycetales;f__Actinomycetaceae;g__Pauljensenia;s__Pauljensenia_sp018382595	Pauljensenia_sp018382595	24893	0	0	0	4544	0	0	0	0	0	0	0	0	0	0	0	0	0	0	0	0	0	0	0	0	0	4117	0	0	0	0	0	0	0	0	0	438	0	0	0	0	0	0	0	0	0	0
	d__Bacteria;p__Actinobacteriota;c__Actinomycetia;o__Actinomycetales;f__Bifidobacteriaceae;g__Bifidobacterium;s__Bifidobacterium_pullorum	Bifidobacterium_pullorum	64	638	0	659	1559	1050	1341	0	738	2798	0	128	348	0	941	1891	142	752	0	0	235	0	0	774	0	208	1908	1211	1117	65	463	335	271	0	0	0	1331	0	0	223	1825	0	129	571	378	235	31
	d__Bacteria;p__Bacteroidota;c__Bacteroidia;o__Bacteroidales;f__Bacteroidaceae;g__Phocaeicola;s__Phocaeicola_merdigallinarum	Phocaeicola_merdigallinarum	0	0	0	0	0	0	0	0	0	0	0	0	0	0	0	0	0	0	0	0	0	0	76	78	0	0	0	0	0	0	0	0	0	189	0	0	0	2734	0	742	0	0	0	0	0	77	315
	d__Bacteria;p__Actinobacteriota;c__Actinomycetia;o__Actinomycetales;f__Bifidobacteriaceae;g__Alloscardovia;s__Alloscardovia_macacae	Alloscardovia_macacae	1049	770	81	363	1723	882	890	146	868	1928	0	144	188	0	757	1323	162	740	0	0	601	0	0	471	0	723	1969	1138	1522	518	266	267	363	0	657	65	889	32	71	24	2424	0	191	499	406	280	216
	d__Bacteria;p__Firmicutes_A;c__Clostridia;o__Oscillospirales;f__Oscillospiraceae;g__Faecousia;s__Faecousia_sp003525905	Faecousia_sp003525905	0	0	0	0	0	0	0	0	0	0	0	0	0	2628	0	0	0	0	0	0	0	10459	4775	0	0	0	0	0	0	0	0	0	0	0	0	0	0	0	0	0	0	0	0	0	0	0	1923
	d__Bacteria;p__Firmicutes_C;c__Negativicutes;o__Veillonellales;f__Dialisteraceae;g__Dialister;s__Dialister_sp002320515	Dialister_sp002320515	0	0	0	0	0	0	0	0	0	0	0	0	0	0	0	201	0	0	0	0	0	0	0	0	0	0	0	0	0	4407	0	0	0	0	0	0	0	0	4924	0	0	0	0	0	0	0	0
	d__Bacteria;p__Proteobacteria;c__Gammaproteobacteria;o__Enterobacterales;f__Enterobacteriaceae;g__Franconibacter;s__Franconibacter_pulveris	Franconibacter_pulveris	160	0	0	0	0	0	0	0	291	0	0	0	0	0	0	352	0	0	0	0	0	0	0	0	129	0	0	0	3057	0	0	0	0	1000	0	0	0	0	0	0	0	0	0	0	0	0	0
	d__Bacteria;p__Firmicutes_A;c__Clostridia;o__Peptostreptococcales;f__Anaerovoracaceae;g__VUNA01;s__VUNA01_sp002299625	VUNA01_sp002299625	0	0	0	0	0	0	0	0	0	0	0	0	0	0	19697	0	0	8338	0	0	2524	0	0	0	0	0	0	0	0	0	0	0	0	0	0	0	0	0	0	0	0	0	0	0	0	0	0
	d__Bacteria;p__Firmicutes_C;c__Negativicutes;o__Acidaminococcales;f__Acidaminococcaceae;g__Phascolarctobacterium_A;s__Phascolarctobacterium_A_sp900553055	Phascolarctobacterium_A_sp900553055	0	0	0	0	0	0	0	0	0	0	4646	0	0	2537	0	0	0	0	2087	0	0	0	0	0	0	0	0	0	0	0	0	0	0	0	0	0	0	0	0	0	0	0	0	0	0	0	0
	d__Bacteria;p__Bacteroidota;c__Bacteroidia;o__Bacteroidales;f__Bacteroidaceae;g__Prevotella;s__Prevotella_sp902800185	Prevotella_sp902800185	0	377	0	0	0	0	0	0	0	0	1726	0	1490	2485	0	0	0	2814	20	372	1699	959	147	0	0	0	0	0	0	0	0	0	0	0	0	0	42	2272	1132	104	147	0	4465	0	0	0	0
	d__Bacteria;p__Firmicutes_A;c__Clostridia;o__Oscillospirales;f__Ruminococcaceae;g__Ruthenibacterium;s__Ruthenibacterium_sp013316265	Ruthenibacterium_sp013316265	0	0	0	0	0	0	0	0	0	0	0	0	0	0	0	0	4115	419	0	0	0	0	0	0	0	0	0	0	0	0	0	0	0	0	0	0	17017	0	0	0	0	0	0	0	0	0	0
	d__Bacteria;p__Bacteroidota;c__Bacteroidia;o__Bacteroidales;f__Rikenellaceae;g__Alistipes;s__Alistipes_sp003979135	Alistipes_sp003979135	0	0	0	0	0	0	0	0	0	0	0	0	61	0	359	0	0	0	0	1252	0	2026	0	0	0	0	0	0	0	0	0	0	0	0	0	0	0	1058	0	0	0	0	0	0	0	2045	6686
	d__Bacteria;p__Firmicutes_A;c__Clostridia;o__Oscillospirales;f__Butyricicoccaceae;g__Agathobaculum;s__Agathobaculum_sp900544475	Agathobaculum_sp900544475	0	0	0	0	0	0	0	0	0	0	0	0	0	8091	0	0	0	0	0	0	0	0	0	0	0	0	0	0	0	0	0	0	0	0	0	459	0	0	23881	0	0	0	0	0	0	0	0
	d__Bacteria;p__Bacteroidota;c__Bacteroidia;o__Bacteroidales;f__Bacteroidaceae;g__Bacteroides;s__Bacteroides_intestinalis	Bacteroides_intestinalis	0	0	0	0	0	0	0	0	0	0	1683	0	0	0	0	0	0	0	0	164	0	3522	1550	160	0	0	0	0	0	0	0	0	0	0	0	0	0	0	534	0	0	0	0	0	0	155	0
	d__Bacteria;p__Firmicutes_A;c__Clostridia;o__Oscillospirales;f__Butyricicoccaceae;g__Agathobaculum;s__Agathobaculum_sp900291975	Agathobaculum_sp900291975	0	0	0	0	0	0	0	0	0	0	0	0	0	0	0	0	0	0	0	0	0	0	0	0	0	0	0	0	0	0	0	0	0	0	0	0	0	0	0	0	0	0	0	0	0	7357	801
	d__Bacteria;p__Firmicutes_A;c__Clostridia;o__Peptostreptococcales;f__Peptostreptococcaceae;g__Paraclostridium;s__Paraclostridium_tenue	Paraclostridium_tenue	0	0	0	0	0	0	0	0	0	0	0	0	0	0	0	0	0	0	0	0	0	0	0	0	0	0	0	0	0	0	0	0	0	0	0	0	0	0	0	0	0	0	0	0	0	0	0
	d__Bacteria;p__Proteobacteria;c__Gammaproteobacteria;o__Enterobacterales;f__Succinivibrionaceae;g__Succinivibrio;s__Succinivibrio_sp002449335	Succinivibrio_sp002449335	0	0	0	0	0	0	0	0	0	0	0	0	0	0	0	0	0	0	0	0	0	7918	0	0	0	0	0	0	0	0	0	0	0	0	0	0	0	0	0	0	0	0	0	0	0	0	0
	d__Bacteria;p__Firmicutes_A;c__Clostridia;o__Oscillospirales;f__Acutalibacteraceae;g__Eubacterium_R;s__Eubacterium_R_sp900539165	Eubacterium_R_sp900539165	0	0	0	0	0	0	0	0	0	0	0	0	0	349	0	0	0	0	495	0	0	0	0	0	0	0	0	0	0	0	0	0	0	0	0	0	0	1006	29960	0	0	0	0	0	0	0	0
	d__Bacteria;p__Firmicutes_A;c__Clostridia;o__TANB77;f__CAG-508;g__CAG-273;s__CAG-273_sp000438355	CAG-273_sp000438355	0	0	0	0	0	0	0	0	0	0	0	0	0	0	0	0	0	0	0	0	0	0	0	0	0	0	0	0	0	0	0	0	0	0	0	0	0	0	0	0	0	2280	0	0	0	0	0
	d__Bacteria;p__Firmicutes_A;c__Clostridia;o__Lachnospirales;f__Lachnospiraceae;g__Sellimonas;s__Sellimonas_avistercoris	Sellimonas_avistercoris	0	0	0	2550	0	0	0	0	0	0	0	0	0	0	0	0	0	0	0	0	0	0	0	0	0	0	0	0	0	0	0	0	0	0	0	0	0	0	0	0	0	0	0	0	0	2343	1000
	d__Bacteria;p__Firmicutes_C;c__Negativicutes;o__Veillonellales;f__Megasphaeraceae;g__Anaeroglobus;s__Anaeroglobus_massiliensis	Anaeroglobus_massiliensis	0	87	0	0	0	3180	0	0	0	378	0	0	0	0	0	113	0	0	0	0	0	0	0	0	0	0	0	6349	0	464	0	0	0	0	0	0	22	0	0	201	244	0	0	109	1138	0	0
	d__Bacteria;p__Bacteroidota;c__Bacteroidia;o__Bacteroidales;f__UBA932;g__Cryptobacteroides;s__Cryptobacteroides_sp002314195	Cryptobacteroides_sp002314195	0	0	0	0	0	0	0	0	0	0	2439	0	0	25192	0	0	0	0	0	0	3766	0	322	0	0	0	0	0	0	0	0	0	0	0	0	0	0	0	0	0	0	0	0	0	0	0	0
	d__Bacteria;p__Firmicutes_A;c__Clostridia;o__Oscillospirales;f__Oscillospiraceae;g__Lawsonibacter;s__Lawsonibacter_sp900545895	Lawsonibacter_sp900545895	0	0	0	0	0	0	0	0	0	0	0	0	0	0	0	0	0	0	0	1121	0	0	0	0	0	0	0	0	0	0	0	0	0	0	0	0	0	707	0	0	0	0	0	0	0	998	537
	d__Bacteria;p__Firmicutes_A;c__Clostridia;o__Oscillospirales;f__Ruminococcaceae;g__Ruminococcus_C;s__Ruminococcus_C_sp000433635	Ruminococcus_C_sp000433635	0	0	0	0	0	0	0	0	0	0	7275	0	0	3329	0	0	0	0	0	0	0	0	0	0	0	0	0	0	0	0	0	0	0	0	0	0	0	0	0	0	0	0	0	0	0	0	0
	d__Bacteria;p__Firmicutes;c__Bacilli;o__Lactobacillales;f__Lactobacillaceae;g__Limosilactobacillus;s__Limosilactobacillus_antri	Limosilactobacillus_antri	0	0	0	0	0	0	0	0	0	0	0	6480	0	0	0	0	0	0	0	0	0	0	0	0	0	0	0	0	0	0	0	0	0	0	0	0	0	0	0	0	0	0	0	26	24363	0	0
	d__Bacteria;p__Firmicutes_A;c__Clostridia;o__Oscillospirales;f__Oscillospiraceae;g__Dysosmobacter;s__Dysosmobacter_avistercoris	Dysosmobacter_avistercoris	0	0	0	0	0	0	0	0	0	0	0	0	0	0	0	0	0	0	0	0	0	0	0	0	0	0	0	0	0	0	0	0	0	0	0	0	0	0	0	0	0	201	0	0	0	3164	3138
	d__Bacteria;p__Firmicutes_A;c__Clostridia;o__Oscillospirales;f__Acutalibacteraceae;g__Ruminococcus_E;s__Ruminococcus_E_sp002493635	Ruminococcus_E_sp002493635	0	0	0	0	0	0	0	0	0	0	0	0	0	269	0	0	0	0	0	554	0	0	0	0	0	0	0	0	0	0	0	0	0	0	0	0	0	1117	1746	0	0	365	0	0	0	0	0
	d__Bacteria;p__Firmicutes_A;c__Clostridia;o__Clostridiales;f__Clostridiaceae;g__Clostridium;s__Clostridium_sp000230835	Clostridium_sp000230835	0	0	0	0	0	0	0	0	0	0	0	0	0	0	0	0	0	0	0	0	0	0	0	0	11996	0	0	0	0	0	0	0	0	0	0	0	0	0	0	0	0	0	0	0	0	0	0
	d__Bacteria;p__Firmicutes_A;c__Clostridia;o__Lachnospirales;f__Lachnospiraceae;g__Eubacterium_G;s__Eubacterium_G_sp000432355	Eubacterium_G_sp000432355	0	0	0	0	0	0	0	0	0	0	0	0	0	0	0	0	0	0	0	0	0	9170	0	0	0	0	0	0	0	0	0	0	0	0	0	0	0	0	0	0	0	255	0	0	0	0	0
	d__Bacteria;p__Actinobacteriota;c__Coriobacteriia;o__Coriobacteriales;f__Atopobiaceae;g__Lancefieldella;s__Lancefieldella_parvula	Lancefieldella_parvula	904	0	23136	0	0	0	0	0	0	0	0	0	0	0	0	0	0	0	0	0	0	0	0	0	0	994	4154	0	35	0	0	0	0	0	0	0	0	0	0	0	0	0	0	779	270	0	0
	d__Bacteria;p__Firmicutes;c__Bacilli;o__Staphylococcales;f__Gemellaceae;g__Gemella;s__Gemella_haemolysans_B	Gemella_haemolysans_B	9688	0	12973	0	0	0	339	0	0	0	0	0	0	0	0	0	0	0	0	0	0	0	0	0	0	0	558	0	0	0	0	0	0	0	0	0	0	0	0	0	0	0	0	0	0	0	0
	d__Bacteria;p__Firmicutes_A;c__Clostridia;o__Clostridiales;f__Clostridiaceae;g__Clostridium;s__Clostridium_celatum	Clostridium_celatum	0	0	0	0	0	0	0	0	0	0	0	0	0	0	0	0	0	0	0	0	0	0	1324	0	1303	0	0	0	0	0	0	0	0	0	0	0	0	0	0	0	0	0	0	0	0	0	0
	d__Bacteria;p__Firmicutes;c__Bacilli;o__Lactobacillales;f__Enterococcaceae;g__Enterococcus_A;s__Enterococcus_A_gilvus	Enterococcus_A_gilvus	0	0	0	0	1270	0	0	0	453	738	0	0	0	0	0	0	0	0	0	0	0	0	0	3104	0	0	0	0	6610	0	444	0	0	0	0	0	442	0	0	0	0	0	0	0	0	0	0
	d__Bacteria;p__Proteobacteria;c__Gammaproteobacteria;o__Enterobacterales;f__Enterobacteriaceae;g__Trabulsiella;s__Trabulsiella_odontotermitis_A	Trabulsiella_odontotermitis_A	0	0	0	0	0	0	0	0	453	0	0	0	0	0	0	332	0	0	0	0	0	0	0	0	123	0	0	0	1627	0	0	0	0	204	0	0	0	0	0	0	0	0	0	0	0	0	0
	d__Bacteria;p__Proteobacteria;c__Gammaproteobacteria;o__Enterobacterales;f__Enterobacteriaceae;g__BIGb0383;s__BIGb0383_sp003751845	BIGb0383_sp003751845	299	0	0	0	0	64	0	0	259	0	0	0	0	0	0	85	0	0	0	0	0	0	0	0	150	0	0	0	1591	0	0	0	0	64	0	0	0	0	0	0	0	0	0	0	0	0	0
	d__Bacteria;p__Proteobacteria;c__Gammaproteobacteria;o__Enterobacterales;f__Pasteurellaceae;g__Rodentibacter;s__Rodentibacter_sp901420285	Rodentibacter_sp901420285	0	914	605	0	329	0	71	0	0	0	0	525	0	0	0	0	0	0	0	0	0	0	589	0	0	653	0	0	0	0	0	0	0	0	0	0	0	0	0	1028	0	0	0	0	0	0	0
	d__Bacteria;p__Actinobacteriota;c__Coriobacteriia;o__Coriobacteriales;f__Atopobiaceae;g__Parolsenella;s__Parolsenella_massiliensis	Parolsenella_massiliensis	0	716	0	0	0	2645	0	0	317	969	0	0	5263	0	504	2077	535	1076	0	0	495	0	6395	361	0	0	0	187	1661	0	0	0	0	0	0	182	411	0	0	356	1183	0	3846	0	0	0	0
	d__Bacteria;p__Firmicutes_A;c__Clostridia;o__Peptostreptococcales;f__Peptostreptococcaceae;g__Asaccharospora;s__Asaccharospora_irregularis	Asaccharospora_irregularis	0	0	0	0	0	0	0	0	0	0	0	0	0	0	0	0	0	0	0	0	0	0	0	180	0	0	0	0	0	0	0	0	0	0	0	0	0	0	0	0	0	0	0	0	0	0	0
	d__Bacteria;p__Bacteroidota;c__Bacteroidia;o__Bacteroidales;f__Marinifilaceae;g__Odoribacter;s__Odoribacter_sp900548135	Odoribacter_sp900548135	0	0	0	0	0	0	0	0	0	0	0	0	174	300	2682	0	0	172	0	0	0	4414	0	0	0	0	0	0	0	0	0	0	0	0	0	0	0	0	0	15128	0	0	0	0	0	0	0
	d__Bacteria;p__Firmicutes_A;c__Clostridia;o__Lachnospirales;f__Lachnospiraceae;g__RUG11200;s__unknown	unknown	0	0	0	0	0	0	0	0	0	0	0	0	0	1232	0	0	0	0	0	186	0	466	1325	0	0	0	0	0	0	0	0	0	0	0	0	1418	0	0	251	0	0	782	0	0	0	0	0
	d__Bacteria;p__Firmicutes_A;c__Clostridia;o__Clostridiales;f__Clostridiaceae;g__Clostridium;s__Clostridium_uliginosum	Clostridium_uliginosum	0	0	0	0	0	0	0	0	0	0	0	0	0	0	0	0	0	0	0	0	0	0	0	0	10109	0	0	0	0	0	0	0	0	0	0	0	0	0	0	0	0	0	0	0	0	0	0
	d__Bacteria;p__Proteobacteria;c__Gammaproteobacteria;o__Enterobacterales;f__Enterobacteriaceae;g__Proteus;s__Proteus_myxofaciens	Proteus_myxofaciens	0	0	0	0	0	0	0	0	10941	2024	0	0	0	0	0	1695	0	0	0	0	0	0	0	0	0	0	0	0	0	0	0	0	73	0	0	0	0	0	0	0	0	0	0	0	437	0	0
	d__Bacteria;p__Firmicutes_A;c__Clostridia;o__Oscillospirales;f__Oscillospiraceae;g__Intestinimonas;s__Intestinimonas_massiliensis	Intestinimonas_massiliensis	0	0	0	0	0	0	0	0	0	0	0	0	0	0	0	0	0	352	0	0	0	1505	0	0	115	0	0	0	0	0	0	0	0	0	0	0	233	0	0	161	0	2200	0	0	0	467	0
	d__Bacteria;p__Proteobacteria;c__Gammaproteobacteria;o__Enterobacterales;f__Enterobacteriaceae;g__Rouxiella;s__Rouxiella_badensis	Rouxiella_badensis	410	0	0	0	0	204	0	0	204	0	0	0	0	0	0	204	0	0	0	0	0	0	0	0	0	0	0	0	2165	0	0	0	0	287	0	0	0	0	0	0	0	0	0	0	0	0	0
	d__Bacteria;p__Firmicutes_A;c__Clostridia;o__Oscillospirales;f__Acutalibacteraceae;g__Clostridium_E;s__Clostridium_E_merdae	Clostridium_E_merdae	0	0	0	0	0	0	0	0	0	0	0	0	0	0	0	0	0	0	0	0	0	0	0	0	0	0	0	0	0	0	0	0	0	0	0	0	0	0	0	0	0	0	0	0	0	0	0
	d__Bacteria;p__Proteobacteria;c__Gammaproteobacteria;o__Enterobacterales;f__Enterobacteriaceae;g__Scandinavium;s__Scandinavium_sp900215375	Scandinavium_sp900215375	519	0	0	0	0	182	0	0	595	0	0	0	0	0	0	89	0	0	0	0	0	0	0	0	89	0	0	0	2027	0	0	0	0	402	0	0	0	0	0	0	0	0	0	0	0	0	0
	d__Bacteria;p__Firmicutes_A;c__Clostridia;o__Lachnospirales;f__Anaerotignaceae;g__UBA8514;s__unknown	unknown	0	0	0	0	0	0	0	0	0	0	0	0	0	0	0	0	0	0	0	0	0	0	0	0	0	0	0	0	0	0	0	0	0	0	0	0	0	0	0	0	0	0	0	0	0	1183	0
	d__Bacteria;p__Bacteroidota;c__Bacteroidia;o__Bacteroidales;f__Bacteroidaceae;g__Prevotella;s__Prevotella_seregens	Prevotella_seregens	0	248	0	0	0	0	0	0	0	0	903	0	492	788	0	0	0	2446	0	0	1117	364	0	0	0	0	0	0	0	0	0	0	0	0	0	1207	0	481	251	0	0	0	3134	0	0	0	0
	d__Bacteria;p__Firmicutes_A;c__Clostridia;o__Oscillospirales;f__Oscillospiraceae;g__CAG-170;s__CAG-170_sp900548625	CAG-170_sp900548625	0	0	0	0	0	0	0	0	0	0	0	0	0	21679	0	0	0	0	0	0	0	6778	0	0	0	0	0	0	0	0	0	0	0	0	0	0	0	0	0	0	0	0	0	0	0	0	0
	d__Bacteria;p__Firmicutes_A;c__Clostridia;o__Oscillospirales;f__Oscillospiraceae;g__CAG-83;s__CAG-83_sp900313295	CAG-83_sp900313295	0	0	0	0	0	0	0	0	0	0	214	0	0	8385	3828	0	0	0	1867	0	4632	8154	0	0	0	0	0	0	0	0	0	0	0	0	0	0	0	597	0	0	0	776	0	0	0	0	0
	d__Bacteria;p__Firmicutes_A;c__Clostridia;o__Christensenellales;f__Borkfalkiaceae;g__Scatosoma;s__Scatosoma_sp003150575	Scatosoma_sp003150575	0	0	0	0	0	0	0	0	0	0	0	0	0	0	0	0	0	0	0	0	0	0	0	0	0	0	0	0	0	0	0	0	0	0	0	0	0	0	0	0	0	0	0	0	0	0	0
	d__Bacteria;p__Bacteroidota;c__Bacteroidia;o__Bacteroidales;f__Tannerellaceae;g__Barb7;s__Barb7_sp010500925	Barb7_sp010500925	0	166	0	0	0	0	0	0	0	0	88	0	126	38	368	0	0	97	0	369	0	858	97	0	0	0	0	0	0	0	0	0	0	2280	0	0	0	567	38	208	0	463	0	0	0	88	9
	d__Bacteria;p__Desulfobacterota_I;c__Desulfovibrionia;o__Desulfovibrionales;f__Desulfovibrionaceae;g__Desulfovibrio;s__Desulfovibrio_sp900556755	Desulfovibrio_sp900556755	0	0	0	0	0	0	0	0	0	0	0	0	0	14143	1996	0	0	0	0	0	12131	0	0	0	0	0	0	0	0	0	0	0	0	0	0	0	0	0	0	0	0	0	0	0	0	0	0
	d__Bacteria;p__Firmicutes_A;c__Clostridia;o__Oscillospirales;f__Oscillospiraceae;g__Dysosmobacter;s__Dysosmobacter_sp900550685	Dysosmobacter_sp900550685	0	0	0	0	0	0	0	0	0	0	3389	0	0	3227	0	0	0	0	90	8521	419	2425	0	0	0	0	0	0	0	0	0	0	0	0	0	0	0	7595	0	0	0	1104	0	0	0	0	0
	d__Bacteria;p__Proteobacteria;c__Gammaproteobacteria;o__Enterobacterales;f__Enterobacteriaceae;g__Erwinia;s__Erwinia_billingiae	Erwinia_billingiae	109	0	0	0	0	0	0	0	53	0	0	0	0	0	0	0	0	0	0	0	0	0	0	0	0	0	0	0	760	0	0	0	0	54	0	0	0	0	0	0	0	0	0	0	0	0	0
	d__Bacteria;p__Firmicutes_C;c__Negativicutes;o__Veillonellales;f__Megasphaeraceae;g__Anaeroglobus;s__Anaeroglobus_geminatus	Anaeroglobus_geminatus	0	88	0	0	0	11507	0	0	0	500	0	0	198	0	0	388	0	0	0	0	0	0	0	0	0	0	0	365	0	724	44	0	0	0	0	3774	65	0	0	442	506	0	0	175	6098	0	0
	d__Bacteria;p__Firmicutes_A;c__Clostridia;o__Lachnospirales;f__Lachnospiraceae;g__Mediterraneibacter;s__Mediterraneibacter_massiliensis	Mediterraneibacter_massiliensis	0	0	0	15	0	0	0	0	0	0	60	0	107	31	0	0	0	0	76	0	0	31	170	0	0	0	0	0	0	92	0	0	0	0	0	0	0	262	0	0	0	77	0	0	0	931	0
	d__Bacteria;p__Bacteroidota;c__Bacteroidia;o__Bacteroidales;f__Rikenellaceae;g__Alistipes;s__Alistipes_sp910577475	Alistipes_sp910577475	0	0	0	0	0	0	0	0	0	0	0	0	0	0	324	0	0	0	0	990	0	2090	0	0	0	0	0	0	0	0	0	0	0	0	0	0	0	2397	0	0	0	0	0	0	0	767	3242
	d__Bacteria;p__Firmicutes_A;c__Clostridia;o__Lachnospirales;f__Lachnospiraceae;g__Limivivens;s__Limivivens_sp900543575	Limivivens_sp900543575	0	0	0	0	0	0	0	0	0	0	0	0	0	347	0	0	538	0	0	0	0	0	0	0	0	0	0	0	0	1180	0	0	0	0	0	0	0	2873	2930	0	0	6437	0	0	0	0	0
	d__Bacteria;p__Firmicutes_C;c__Negativicutes;o__Acidaminococcales;f__Acidaminococcaceae;g__Acidaminococcus;s__Acidaminococcus_fermentans	Acidaminococcus_fermentans	0	0	0	0	0	0	0	0	0	1449	0	0	0	0	2118	9202	0	0	0	0	0	0	0	0	0	0	0	0	0	0	0	0	3793	0	0	0	0	0	0	4994	861	0	0	0	4981	0	0
	d__Bacteria;p__Firmicutes;c__Bacilli;o__Staphylococcales;f__Staphylococcaceae;g__Staphylococcus;s__Staphylococcus_sp015025035	Staphylococcus_sp015025035	2147	0	22297	0	0	0	0	0	0	0	0	0	0	0	0	0	0	0	0	0	0	0	0	0	0	0	0	0	0	0	0	0	0	0	0	0	0	0	0	0	0	0	0	0	0	0	0
	d__Bacteria;p__Firmicutes_A;c__Clostridia;o__Oscillospirales;f__Oscillospiraceae;g__CAG-83;s__CAG-83_sp000435555	CAG-83_sp000435555	0	0	0	0	0	0	0	0	0	0	2734	0	0	630	0	0	0	0	8530	0	0	3662	0	0	0	0	0	0	0	0	0	0	0	0	0	0	0	3231	0	0	0	0	0	0	0	0	0
	d__Bacteria;p__Firmicutes_A;c__Clostridia;o__Lachnospirales;f__Lachnospiraceae;g__Blautia_A;s__Blautia_A_sp900551075	Blautia_A_sp900551075	0	0	0	45	0	0	0	0	0	0	91	0	410	483	161	139	0	301	69	273	0	712	22	0	0	0	0	0	0	706	0	0	0	0	0	23	23	291	468	0	0	389	257	0	0	276	92
	d__Bacteria;p__Firmicutes;c__Bacilli;o__Erysipelotrichales;f__Erysipelotrichaceae;g__Dielma;s__Dielma_fastidiosa	Dielma_fastidiosa	0	0	0	0	0	0	0	0	0	0	0	0	0	0	0	0	0	0	0	0	0	0	0	0	0	0	0	0	0	0	0	0	0	0	0	0	0	0	0	0	0	0	0	0	0	108	0
	d__Bacteria;p__Bacteroidota;c__Bacteroidia;o__Bacteroidales;f__Bacteroidaceae;g__Prevotella;s__Prevotella_sp900199655	Prevotella_sp900199655	0	371	0	0	0	0	0	0	0	0	2332	0	1286	1395	0	0	0	2513	84	234	1475	704	178	0	0	0	0	0	0	0	0	0	0	0	0	0	126	1359	469	21	52	0	5042	0	0	10	21
	d__Bacteria;p__Bacteroidota;c__Bacteroidia;o__Bacteroidales;f__Rikenellaceae;g__Alistipes;s__Alistipes_sp001941065	Alistipes_sp001941065	0	0	0	0	0	0	0	0	0	0	0	0	0	0	0	0	0	0	0	0	0	11840	0	0	0	0	0	0	0	0	0	0	0	0	0	0	0	12552	0	0	0	0	0	0	0	691	1682
	d__Bacteria;p__Proteobacteria;c__Gammaproteobacteria;o__Enterobacterales;f__Pasteurellaceae;g__Rodentibacter;s__Rodentibacter_sp001999285	Rodentibacter_sp001999285	0	580	615	0	159	0	241	0	0	0	0	449	0	0	0	0	0	0	0	0	0	0	244	0	0	497	0	0	0	0	0	0	0	0	0	0	0	0	0	742	53	0	0	0	0	0	0
	d__Bacteria;p__Bacteroidota;c__Bacteroidia;o__Bacteroidales;f__Marinifilaceae;g__Odoribacter;s__Odoribacter_sp905193145	Odoribacter_sp905193145	0	0	0	0	0	0	0	0	0	0	0	0	485	407	2471	0	0	442	0	0	0	3273	0	0	0	0	0	0	0	0	0	0	0	0	0	0	0	0	0	11526	0	0	0	0	0	0	103
	d__Bacteria;p__Firmicutes;c__Bacilli;o__Lactobacillales;f__Streptococcaceae;g__Streptococcus;s__Streptococcus_orisratti	Streptococcus_orisratti	1336	791	4709	0	279	688	2147	0	301	0	0	497	0	0	0	242	0	0	0	0	0	0	0	0	2855	148	2404	132	81	0	0	3144	13	0	0	0	0	0	0	0	358	0	0	2767	53	0	0
	d__Bacteria;p__Actinobacteriota;c__Actinomycetia;o__Actinomycetales;f__Bifidobacteriaceae;g__Galliscardovia;s__Galliscardovia_primatium	Galliscardovia_primatium	0	681	0	596	1118	632	1038	0	515	1375	0	185	218	0	927	1345	134	528	0	0	216	0	0	548	0	285	1462	1073	957	150	398	268	165	0	50	0	563	0	0	0	999	0	164	284	299	186	182
	d__Bacteria;p__Firmicutes_C;c__Negativicutes;o__Veillonellales;f__Veillonellaceae;g__Veillonella;s__Veillonella_sp900550455	Veillonella_sp900550455	0	0	0	0	0	22515	751	0	0	0	0	0	0	0	0	0	0	0	0	0	0	0	0	0	0	0	0	0	0	0	0	3045	0	0	0	0	0	0	0	0	59	0	0	0	0	0	0
	d__Bacteria;p__Firmicutes_A;c__Clostridia;o__Peptostreptococcales;f__Peptostreptococcaceae;g__Romboutsia_B;s__Romboutsia_B_maritimum	Romboutsia_B_maritimum	0	0	0	0	0	0	0	0	0	0	0	0	0	0	0	0	0	0	0	0	0	0	0	88	0	0	0	0	0	0	0	0	0	0	0	0	0	0	0	0	0	0	0	0	0	0	0
	d__Bacteria;p__Proteobacteria;c__Gammaproteobacteria;o__Enterobacterales;f__Enterobacteriaceae;g__Proteus;s__Proteus_sp003144505	Proteus_sp003144505	0	0	0	0	0	0	0	0	15626	1449	0	0	0	0	0	487	0	0	0	0	0	0	0	0	0	0	0	0	0	0	0	0	0	0	0	0	0	0	0	0	0	0	0	0	0	0	0
	d__Bacteria;p__Firmicutes_C;c__Negativicutes;o__Acidaminococcales;f__Acidaminococcaceae;g__Acidaminococcus;s__Acidaminococcus_timonensis	Acidaminococcus_timonensis	0	0	0	0	0	0	0	0	0	447	0	0	0	0	3200	6711	0	0	0	0	0	0	0	0	0	0	0	0	0	0	0	0	1553	0	0	0	0	0	0	11219	315	0	0	0	2864	0	0
	d__Bacteria;p__Bacteroidota;c__Bacteroidia;o__Bacteroidales;f__Bacteroidaceae;g__Bacteroides_G;s__Bacteroides_G_luti	Bacteroides_G_luti	0	264	0	0	0	0	0	0	0	0	261	0	429	11	333	0	0	60	0	719	0	416	336	420	0	0	0	0	0	0	0	0	0	72	0	0	96	773	131	761	0	107	0	0	0	357	228
	d__Bacteria;p__Proteobacteria;c__Gammaproteobacteria;o__Enterobacterales;f__Enterobacteriaceae;g__Erwinia_A;s__Erwinia_A_teleogrylli	Erwinia_A_teleogrylli	295	0	0	0	0	63	0	0	194	0	0	0	0	0	0	63	0	0	0	0	0	0	0	0	410	0	106	0	826	0	42	0	107	452	0	0	0	0	0	0	0	0	0	0	0	0	0
	d__Bacteria;p__Bacteroidota;c__Bacteroidia;o__Bacteroidales;f__Tannerellaceae;g__Macellibacteroides;s__Macellibacteroides_fermentans	Macellibacteroides_fermentans	0	182	0	0	0	0	0	0	0	0	120	0	296	381	0	0	0	30	0	181	0	1326	0	0	0	0	0	0	0	0	0	0	0	243	0	0	0	272	0	120	0	1646	0	0	0	0	0
	d__Bacteria;p__Bacteroidota;c__Bacteroidia;o__Bacteroidales;f__Bacteroidaceae;g__Phocaeicola;s__Phocaeicola_sp000436795	Phocaeicola_sp000436795	0	0	0	0	0	0	0	0	0	0	0	0	0	0	128	0	0	0	0	411	0	0	0	0	0	0	0	0	0	0	0	0	0	0	0	0	0	4692	0	372	0	0	0	0	0	0	126
	d__Bacteria;p__Actinobacteriota;c__Coriobacteriia;o__Coriobacteriales;f__Coriobacteriaceae;g__Collinsella;s__unknown	unknown	0	1047	0	0	0	277	0	0	639	0	0	0	742	0	632	24	915	47	0	0	3780	0	297	0	0	0	0	0	0	2839	394	0	522	0	0	0	972	337	352	151	395	0	330	0	0	416	0
	d__Bacteria;p__Firmicutes_A;c__Clostridia;o__Lachnospirales;f__Lachnospiraceae;g__Merdimonas;s__Merdimonas_faecis	Merdimonas_faecis	0	0	0	0	0	0	0	0	0	0	0	0	0	0	0	0	0	0	0	0	0	0	179	0	0	0	0	0	0	0	0	0	0	0	0	0	0	0	0	0	0	0	0	0	0	36	0
	d__Bacteria;p__Proteobacteria;c__Gammaproteobacteria;o__Enterobacterales;f__Enterobacteriaceae;g__Erwinia;s__Erwinia_rhapontici	Erwinia_rhapontici	0	0	0	0	0	0	0	0	193	0	0	0	0	0	0	37	0	0	0	0	0	0	0	0	0	0	0	0	814	0	0	0	0	0	0	0	0	0	0	0	0	0	0	0	0	0	0
	d__Bacteria;p__Firmicutes_A;c__Clostridia;o__Lachnospirales;f__Lachnospiraceae;g__Eubacterium_I;s__Eubacterium_I_sp900557275	Eubacterium_I_sp900557275	0	0	0	0	0	0	0	0	0	0	52	0	265	2251	0	0	0	0	1101	545	0	288	2352	0	0	0	0	0	0	0	0	0	0	0	0	53	0	6254	52	0	0	639	0	0	0	0	0
	d__Bacteria;p__Firmicutes_A;c__Clostridia;o__Lachnospirales;f__Lachnospiraceae;g__UBA3402;s__UBA3402_sp003478355	UBA3402_sp003478355	0	0	0	0	0	0	0	0	0	0	1905	0	0	4427	0	0	0	0	0	0	0	0	3060	0	0	0	0	0	0	0	0	0	0	0	0	0	0	0	2721	0	0	4762	0	0	0	0	0
	d__Bacteria;p__Firmicutes;c__Bacilli;o__Lactobacillales;f__Lactobacillaceae;g__Lactobacillus;s__Lactobacillus_rodentium	Lactobacillus_rodentium	0	0	1025	0	0	623	2401	0	0	0	0	2864	0	0	0	0	0	0	0	0	0	0	0	0	0	1425	0	0	0	0	0	14201	0	0	89	0	0	0	0	0	0	0	0	0	2316	0	0
	d__Bacteria;p__Firmicutes_A;c__Clostridia;o__TANB77;f__CAG-508;g__CAG-269;s__CAG-269_sp905213875	CAG-269_sp905213875	0	0	0	0	0	0	0	0	0	0	0	0	0	176	0	0	0	0	7543	0	0	17382	0	0	0	0	0	0	0	0	0	0	0	0	0	0	0	0	0	0	0	263	0	0	0	0	0
	d__Bacteria;p__Firmicutes_A;c__Clostridia;o__Lachnospirales;f__Lachnospiraceae;g__Fimousia;s__Fimousia_sp001940245	Fimousia_sp001940245	0	0	0	0	0	0	0	0	0	0	269	0	0	536	0	0	0	0	0	0	0	0	1092	0	0	0	0	0	0	0	0	0	0	0	0	0	0	338	0	0	0	0	0	0	0	0	0
	d__Bacteria;p__Proteobacteria;c__Gammaproteobacteria;o__Enterobacterales;f__Enterobacteriaceae;g__Phytobacter;s__Phytobacter_ursingii	Phytobacter_ursingii	0	0	0	0	0	0	0	0	804	0	0	0	0	0	0	0	0	0	0	0	0	0	0	0	0	0	0	0	0	0	0	0	0	0	0	0	0	0	0	0	0	0	0	0	0	0	0
	d__Bacteria;p__Firmicutes_A;c__Clostridia;o__Oscillospirales;f__Ruminococcaceae;g__Ruminococcus_C;s__unknown	unknown	0	0	0	0	0	0	0	0	0	0	27	0	5500	0	508	0	0	0	0	0	0	205	0	0	0	0	0	0	0	0	0	0	0	0	0	0	0	0	0	0	0	699	0	0	0	0	0
	d__Bacteria;p__Firmicutes_A;c__Clostridia;o__Oscillospirales;f__Oscillospiraceae;g__CAG-83;s__CAG-83_sp900756715	CAG-83_sp900756715	0	0	0	0	0	0	0	0	0	0	1730	0	0	3325	1023	0	0	0	3104	0	1548	4988	109	0	0	0	0	0	0	0	0	0	0	0	0	0	0	1846	275	0	0	4523	0	0	0	72	0
	d__Bacteria;p__Firmicutes_A;c__Clostridia;o__Lachnospirales;f__Lachnospiraceae;g__UBA9414;s__UBA9414_sp003458885	UBA9414_sp003458885	0	0	0	0	0	0	0	0	0	0	330	0	326	437	0	93	0	0	0	0	0	199	563	0	0	0	0	0	0	778	0	0	0	0	0	16	0	252	181	0	0	252	0	0	30	406	0
	d__Bacteria;p__Proteobacteria;c__Gammaproteobacteria;o__Enterobacterales;f__Enterobacteriaceae;g__Kosakonia;s__Kosakonia_sp000814905	Kosakonia_sp000814905	148	0	0	0	0	0	0	0	765	0	0	0	0	0	0	222	0	0	0	0	0	0	0	0	272	0	0	0	1607	0	0	123	171	445	0	0	0	0	0	73	0	0	0	0	0	0	0
	d__Bacteria;p__Bacteroidota;c__Bacteroidia;o__Bacteroidales;f__Bacteroidaceae;g__Phocaeicola_A;s__Phocaeicola_A_sp900291465	Phocaeicola_A_sp900291465	0	45	0	0	0	0	0	0	0	0	215	0	627	167	425	0	0	635	0	1573	0	380	176	0	0	0	0	0	0	0	0	0	0	0	0	0	45	2533	0	599	0	0	0	0	0	554	788
	d__Bacteria;p__Firmicutes_A;c__Clostridia;o__Oscillospirales;f__Oscillospiraceae;g__An92;s__An92_sp900199495	An92_sp900199495	0	0	0	21	0	0	0	0	0	107	0	0	0	0	0	0	337	610	0	0	0	0	0	104	797	0	0	0	0	0	0	0	124	0	0	0	452	0	0	458	0	0	0	0	0	799	21
	d__Bacteria;p__Firmicutes_A;c__Clostridia;o__Clostridiales;f__Clostridiaceae;g__Clostridium;s__Clostridium_sartagoforme_A	Clostridium_sartagoforme_A	363	0	0	0	0	2343	0	656	263	0	0	0	0	0	0	0	0	0	0	0	0	0	0	0	3441	0	0	0	0	976	0	0	117	0	0	0	0	0	0	0	0	0	0	0	0	0	0
	d__Bacteria;p__Bacteroidota;c__Bacteroidia;o__Bacteroidales;f__Tannerellaceae;g__Parabacteroides;s__Parabacteroides_timonensis	Parabacteroides_timonensis	0	0	0	0	0	0	0	0	0	0	0	0	0	0	0	0	0	0	0	0	0	4031	0	0	0	0	0	0	0	0	0	0	0	0	0	0	0	0	0	0	0	2809	0	0	0	0	0
	d__Bacteria;p__Firmicutes_A;c__Clostridia;o__Oscillospirales;f__Ruminococcaceae;g__Gemmiger;s__Gemmiger_stercoripullorum	Gemmiger_stercoripullorum	0	0	0	0	0	0	0	0	0	0	0	0	950	219	101	0	0	449	738	102	124	460	510	0	0	0	0	0	0	0	0	0	0	0	0	0	0	1740	304	0	0	1036	0	0	0	812	685
	d__Bacteria;p__Firmicutes_A;c__Clostridia;o__Lachnospirales;f__Lachnospiraceae;g__Mediterraneibacter;s__Mediterraneibacter_excrementigallinarum_A	Mediterraneibacter_excrementigallinarum_A	0	0	0	70	0	0	0	0	0	0	175	0	192	332	0	0	0	0	87	0	0	519	319	0	0	0	0	0	0	71	0	0	0	0	0	35	0	351	0	0	0	209	0	0	53	915	0
	d__Bacteria;p__Bacteroidota;c__Bacteroidia;o__Bacteroidales;f__Bacteroidaceae;g__Prevotella;s__Prevotella_corporis	Prevotella_corporis	0	0	0	0	5038	0	0	0	0	5442	2187	0	1076	408	0	2115	0	438	0	0	60	0	136	0	0	0	0	0	0	0	0	0	0	0	0	0	0	459	87	0	114	0	553	855	1590	2373	0
	d__Bacteria;p__Desulfobacterota_I;c__Desulfovibrionia;o__Desulfovibrionales;f__Desulfovibrionaceae;g__Bilophila;s__Bilophila_sp902373525	Bilophila_sp902373525	0	0	0	0	0	0	0	0	0	0	0	0	0	0	0	0	0	0	0	0	0	0	0	21703	0	0	0	0	0	0	0	0	0	0	0	0	0	0	0	0	0	0	0	0	0	0	0
	d__Bacteria;p__Firmicutes_C;c__Negativicutes;o__Veillonellales;f__Veillonellaceae;g__Veillonella_A;s__Veillonella_A_criceti	Veillonella_A_criceti	0	133	22	0	0	156	1750	0	0	2391	0	88	0	0	0	0	0	0	0	0	0	0	0	0	0	0	0	0	0	0	1020	546	0	0	0	0	0	0	0	0	54	0	0	0	88	0	0
	d__Bacteria;p__Proteobacteria;c__Gammaproteobacteria;o__Enterobacterales;f__Enterobacteriaceae;g__Erwinia;s__Erwinia_oleae	Erwinia_oleae	0	0	0	0	0	0	0	0	19	0	0	0	0	0	0	0	0	0	0	0	0	0	0	0	0	0	0	0	132	0	0	0	0	19	0	0	0	0	0	0	0	0	0	0	0	0	0
	d__Bacteria;p__Firmicutes_A;c__Clostridia;o__Lachnospirales;f__Lachnospiraceae;g__Blautia_A;s__Blautia_A_caecimuris	Blautia_A_caecimuris	0	0	0	0	0	0	0	0	0	0	0	0	0	0	0	0	0	0	0	0	0	0	0	0	0	0	0	0	0	0	0	0	0	0	0	0	0	0	0	0	0	0	0	0	0	0	0
	d__Bacteria;p__Actinobacteriota;c__Coriobacteriia;o__Coriobacteriales;f__Eggerthellaceae;g__Senegalimassilia;s__Senegalimassilia_sp900550055	Senegalimassilia_sp900550055	0	3395	0	0	0	0	0	0	0	0	0	0	2037	625	2354	0	0	679	0	0	1875	1358	605	0	0	0	0	626	0	0	2716	0	0	0	0	0	0	2716	0	0	4753	0	679	0	0	0	0
	d__Bacteria;p__Proteobacteria;c__Gammaproteobacteria;o__Enterobacterales;f__Enterobacteriaceae;g__Scandinavium;s__Scandinavium_sp902706235	Scandinavium_sp902706235	0	0	0	0	0	0	0	0	213	0	0	0	0	0	0	210	0	0	0	0	0	0	0	0	0	0	0	0	218	0	0	0	0	128	0	0	0	0	0	0	0	0	0	0	0	0	0
	d__Bacteria;p__Firmicutes_A;c__Clostridia;o__Oscillospirales;f__Ruminococcaceae;g__Ruthenibacterium;s__unknown	unknown	0	0	0	0	0	0	0	0	0	0	0	0	0	0	0	0	3032	366	0	0	0	0	0	0	0	0	0	0	0	0	0	0	0	0	0	0	12718	26	0	27	0	26	0	0	0	0	0
	d__Bacteria;p__Bacteroidota;c__Bacteroidia;o__Bacteroidales;f__Bacteroidaceae;g__Bacteroides_H;s__Bacteroides_H_sp010501015	Bacteroides_H_sp010501015	0	102	0	0	0	0	0	0	0	0	228	0	349	0	196	0	0	0	0	704	0	238	278	475	0	0	0	0	0	0	0	0	0	20	0	0	41	731	145	551	0	31	0	0	0	363	300
	d__Bacteria;p__Firmicutes_A;c__Clostridia;o__Lachnospirales;f__Lachnospiraceae;g__Choladocola;s__Choladocola_sp018223365	Choladocola_sp018223365	0	0	0	0	0	0	0	0	0	0	716	0	0	715	0	0	0	0	722	0	0	0	0	0	0	0	0	0	0	0	0	0	0	0	0	0	0	0	0	0	0	15295	0	0	0	305	0
	d__Bacteria;p__Proteobacteria;c__Gammaproteobacteria;o__Burkholderiales;f__Burkholderiaceae;g__Sutterella;s__Sutterella_seckii_A	Sutterella_seckii_A	0	9743	0	0	0	0	0	0	0	0	0	0	3776	0	0	0	0	7561	0	630	0	0	1629	0	0	0	0	0	0	0	0	0	0	0	0	0	0	0	0	0	0	0	0	0	0	0	0
	d__Bacteria;p__Bacteroidota;c__Bacteroidia;o__Bacteroidales;f__Rikenellaceae;g__Alistipes;s__Alistipes_timonensis	Alistipes_timonensis	0	0	0	0	0	0	0	0	0	0	0	0	0	0	0	0	0	0	0	0	0	6968	0	0	0	0	0	0	0	0	0	0	0	0	0	0	0	9464	0	0	0	0	0	0	0	1363	5849
	d__Bacteria;p__Firmicutes_C;c__Negativicutes;o__Veillonellales;f__Dialisteraceae;g__Dialister;s__Dialister_sp900543165	Dialister_sp900543165	0	2589	0	0	0	0	0	0	0	0	0	0	2584	430	0	0	0	3880	1299	0	860	2032	862	0	0	0	0	0	0	0	0	0	0	0	0	861	0	1226	0	0	4744	0	430	0	0	0	0
	d__Bacteria;p__Bacteroidota;c__Bacteroidia;o__Bacteroidales;f__Bacteroidaceae;g__Prevotella;s__Prevotella_pectinovora	Prevotella_pectinovora	0	76	0	0	0	0	0	0	0	0	770	0	1057	781	0	0	0	4330	0	0	1970	153	0	0	0	0	0	0	0	0	0	0	0	0	0	0	0	0	0	0	0	0	4717	0	0	0	0
	d__Bacteria;p__Bacteroidota;c__Bacteroidia;o__Bacteroidales;f__Bacteroidaceae;g__Prevotella;s__Prevotella_sp900316565	Prevotella_sp900316565	0	215	0	0	0	0	0	0	0	0	2090	0	909	1320	0	0	0	2234	96	49	1073	286	220	0	0	0	0	0	0	0	0	0	0	0	0	0	0	1586	790	25	25	0	3232	0	0	0	0
	d__Bacteria;p__Bacteroidota;c__Bacteroidia;o__Bacteroidales;f__Bacteroidaceae;g__Prevotella;s__Prevotella_bryantii	Prevotella_bryantii	0	208	0	0	0	0	0	0	0	0	3108	0	1836	2084	0	0	89	890	212	150	151	415	997	0	0	0	0	0	0	0	0	0	0	0	0	0	0	2857	2553	248	122	0	2952	0	0	0	0
	d__Bacteria;p__Firmicutes_A;c__Clostridia;o__Clostridiales;f__Clostridiaceae;g__Clostridium;s__Clostridium_chromiireducens	Clostridium_chromiireducens	0	0	0	0	0	0	0	0	0	0	0	0	0	0	0	0	0	0	0	0	0	0	0	0	9332	0	0	0	0	0	0	0	0	0	0	0	0	0	0	0	0	0	0	0	0	0	0
	d__Bacteria;p__Proteobacteria;c__Gammaproteobacteria;o__Enterobacterales;f__Enterobacteriaceae;g__JGM124;s__JGM124_sp018257795	JGM124_sp018257795	14	363	72	0	174	0	290	0	959	130	0	71	87	0	0	320	42	0	0	0	0	0	0	0	619	0	394	87	668	0	525	359	580	405	0	0	0	0	0	274	0	0	0	217	14	0	0
	d__Bacteria;p__Firmicutes_A;c__Clostridia;o__Oscillospirales;f__Oscillospiraceae;g__CAG-170;s__CAG-170_sp900553545	CAG-170_sp900553545	0	0	0	0	0	0	0	0	0	0	1086	0	0	18630	328	0	0	0	757	0	0	2197	0	0	0	0	0	0	0	0	0	0	0	0	0	0	0	0	0	0	0	0	0	0	0	0	0
	d__Bacteria;p__Actinobacteriota;c__Coriobacteriia;o__Coriobacteriales;f__Eggerthellaceae;g__CAJFUR01;s__CAJFUR01_sp904420575	CAJFUR01_sp904420575	0	0	0	0	0	0	0	0	4665	810	0	0	0	0	0	573	283	0	0	0	0	0	0	441	0	0	0	0	0	606	0	0	0	0	0	0	1145	0	0	0	0	0	0	0	0	0	0
	d__Bacteria;p__Firmicutes_C;c__Negativicutes;o__Acidaminococcales;f__Acidaminococcaceae;g__Phascolarctobacterium_A;s__unknown	unknown	0	0	0	0	0	0	0	0	0	0	11062	0	0	6958	0	0	0	0	3612	0	0	0	0	116	0	0	0	0	0	0	0	0	0	0	0	0	0	0	0	0	0	0	0	0	0	0	0
	d__Bacteria;p__Firmicutes_A;c__Clostridia;o__Lachnospirales;f__Lachnospiraceae;g__Blautia_A;s__Blautia_A_schinkii	Blautia_A_schinkii	0	0	0	0	0	0	0	0	0	0	0	0	0	0	554	0	0	373	0	0	0	178	0	0	0	0	0	0	0	5061	88	0	0	0	0	0	0	593	421	0	0	0	789	0	0	0	0
[truncated: 1,032 more rows]
[truncated: 54 more columns]

## Sheet: cpm taxa plots
		SeqID	elcho25	elcho01	elcho02	elcho26	elcho03	elcho04	elcho05	elcho27	elcho28	elcho06	elcho29	elcho07	elcho08	elcho30	elcho09	elcho10	elcho31	elcho32	elcho11	elcho33	elcho12	elcho34	elcho13	elcho14	elcho35	elcho15	elcho36	elcho37	elcho16	elcho17	elcho38	elcho39	elcho40	elcho18	elcho41	elcho19	elcho20	elcho42	elcho43	elcho44	elcho45	elcho46	elcho47	elcho48	elcho21	elcho49	elcho50
[truncated: 2,240 more rows]
[truncated: 56 more columns]

[truncated: 6 more sheets: figure 1, alpha stats, pco and permanova, meta, cpm, alpha raw data]
