# Supplementary material for: Indigenous infants in remote Australia retain an ancestral gut microbiome despite encroaching Westernization
Source: Research Square preprint supplement (doi:10.21203/rs.3.rs-6101879/v1), 2025-03-13
Supplement: Supplementary file 5 [file dd720c746c2b7a9255e33e20.xlsx]

## Sheet: species
	SampleID	elcho01	elcho02	elcho03	elcho04	elcho05	elcho06	elcho07	elcho08	elcho09	elcho10	elcho11	elcho12	elcho13	elcho14	elcho15	elcho16	elcho17	elcho18	elcho19	elcho20	elcho21	elcho22	elcho23	elcho24	elcho25	elcho26	elcho27	elcho28	elcho29	elcho30	elcho31	elcho32	elcho33	elcho34	elcho35	elcho36	elcho37	elcho38	elcho39	elcho40	elcho41	elcho42	elcho43	elcho44	elcho45	elcho46	elcho47	elcho48
	Study	elcho	elcho	elcho	elcho	elcho	elcho	elcho	elcho	elcho	elcho	elcho	elcho	elcho	elcho	elcho	elcho	elcho	elcho	elcho	elcho	elcho	elcho	elcho	elcho	elcho	elcho	elcho	elcho	elcho	elcho	elcho	elcho	elcho	elcho	elcho	elcho	elcho	elcho	elcho	elcho	elcho	elcho	elcho	elcho	elcho	elcho	elcho	elcho
	Age_days	35	35	56	60	100	149	164	166	214	217	245	279	308	311	332	356	367	405	436	441	549	571	594	617	22	47	118	147	160	205	228	240	250	285	329	333	346	374	380	382	431	462	463	476	476	511	511	537
	Age_cat	age0	age0	age0	age0	age0	age0	age1	age1	age1	age1	age1	age1	age2	age2	age2	age2	age2	age2	age2	age2	age3	age3	age3	age3	age0	age0	age0	age0	age1	age1	age1	age1	age1	age1	age2	age2	age2	age2	age2	age2	age2	age3	age3	age3	age3	age3	age3	age3
	Sex	F	F	F	F	F	F	F	F	F	F	F	F	F	F	F	F	F	F	F	F	F	F	F	F	M	M	M	M	M	M	M	M	M	M	M	M	M	M	M	M	M	M	M	M	M	M	M	M
																							ELCHO
	species	elcho01	elcho02	elcho03	elcho04	elcho05	elcho06	elcho07	elcho08	elcho09	elcho10	elcho11	elcho12	elcho13	elcho14	elcho15	elcho16	elcho17	elcho18	elcho19	elcho20	elcho21	elcho22	elcho23	elcho24	elcho25	elcho26	elcho27	elcho28	elcho29	elcho30	elcho31	elcho32	elcho33	elcho34	elcho35	elcho36	elcho37	elcho38	elcho39	elcho40	elcho41	elcho42	elcho43	elcho44	elcho45	elcho46	elcho47	elcho48
d__Bacteria;p__Firmicutes_C;c__Negativicutes;o__Veillonellales;f__Megasphaeraceae;g__Megasphaera;s__Megasphaera_cerevisiae	Megasphaera_.spp	0	1943277	0	99733	0	342	0	3364	330369	1435268	0	15163	1036741	0	49094	514770	355070	190378	0	41486	190117	0	23	754843	0	0	0	1302181	0	2386908	332460	86965	213325	0	0	303874	169145	0	4040	648613	2969919	0	828240	4147301	1557781	109050	11268	15057
d__Bacteria;p__Firmicutes_C;c__Negativicutes;o__Veillonellales;f__Megasphaeraceae;g__Megasphaera;s__Megasphaera_cerevisiae	Megasphaera_elsdenii	0	296028	0	11887	0	0	0	0	53125	178618	0	1133	167903	0	7354	68828	48258	33697	0	5381	29876	0	0	108932	0	0	0	203339	0	374895	44983	11583	34039	0	0	35331	20841	0	0	90650	486985	0	126345	632960	222072	19315	1701	1289
d__Bacteria;p__Firmicutes;c__Bacilli;o__Lactobacillales;f__Streptococcaceae;g__Streptococcus;s__Streptococcus_acidominimus	Streptococcus_lactarius	232026	49399	3042947	2714	75243	1961	468254	17528	16929	10862	0	107530	6883	116	1193	24934	2460	2068	138	0	0	0	5931	11363	429	27016	229815	39422	27158	11868	7709	37094	33895	704	3651	6849	4247	0	2692	1042	30506	0	0	260617	23901	1882	0	858
d__Bacteria;p__Firmicutes_C;c__Negativicutes;o__Veillonellales;f__Megasphaeraceae;g__Caecibacter;s__Caecibacter_hominis	Caecibacter_.spp	0	1604	0	73775	0	0	0	0	98	105381	0	0	53606	0	66532	63112	6271	8861	0	0	5684	2069	20178	295	0	0	0	792	0	139993	47469	0	7121	0	0	284	26796	0	9643	100325	24995	1535	7674	2914	11518	0	39	0
d__Bacteria;p__Firmicutes_C;c__Negativicutes;o__Veillonellales;f__Megasphaeraceae;g__Megasphaera;s__Megasphaera_cerevisiae	Megasphaera_stantonii	0	86547	0	4445	0	0	0	0	14058	69372	0	0	49690	0	2755	26328	15006	7770	0	1219	8239	0	0	32325	0	0	0	43605	0	117411	14557	2593	7971	0	0	12300	7623	0	0	32924	156832	0	39089	184720	64443	3515	234	114
d__Bacteria;p__Firmicutes_C;c__Negativicutes;o__Veillonellales;f__Megasphaeraceae;g__Megasphaera;s__Megasphaera_cerevisiae	Megasphaera_cerevisiae	0	5307	0	503	0	31	0	0	956	4284	0	0	3130	0	649	2158	878	747	0	31	458	0	0	1926	0	0	0	3844	0	7776	1266	63	341	0	0	551	1008	0	0	2486	9940	0	1993	10662	4766	330	0	0
d__Bacteria;p__Actinobacteriota;c__Coriobacteriia;o__Coriobacteriales;f__Atopobiaceae;g__Parolsenella;s__Parolsenella_catena	Parolsenella_catena	0	7722	0	0	0	24788	0	0	25132	4226	0	0	36026	0	2943	8258	2022	3981	0	467	1597	4128	42751	5436	0	0	0	1186	4378	0	0	0	0	0	2509	374	7140	322	0	264	12769	0	41745	0	0	0	0	1008
d__Bacteria;p__Firmicutes_A;c__Clostridia;o__Peptostreptococcales;f__Peptostreptococcaceae;g__Intestinibacter;s__Intestinibacter_bartlettii	Intestinibacter_bartlettii	0	0	0	0	0	0	0	0	0	10484	0	0	869	0	0	10373	2408	0	0	0	0	4264	0	0	0	0	0	0	0	3563	0	0	1127	0	0	0	0	1620	0	0	0	0	459	0	0	22544	2519	0
d__Bacteria;p__Firmicutes_C;c__Negativicutes;o__Veillonellales;f__Megasphaeraceae;g__Caecibacter;s__Caecibacter_hominis	Caecibacter_hominis	0	9313	0	3395	0	0	0	0	1297	7896	0	0	6606	0	1847	5060	2189	902	0	0	686	0	0	3400	0	0	0	4527	0	19336	3670	0	781	0	0	803	2457	0	0	8235	13825	0	4417	17056	7655	264	0	0
d__Bacteria;p__Firmicutes;c__Bacilli;o__Erysipelotrichales;f__Erysipelotrichaceae;g__Clostridium_AQ;s__Clostridium_AQ_innocuum	Clostridium_AQ_innocuum	0	0	0	31394	0	0	0	0	0	0	0	0	0	0	1461	0	9344	0	0	0	0	0	0	3540	0	0	0	0	0	16499	0	0	0	0	0	0	23388	0	180	0	0	0	0	0	0	14291	120	0
d__Bacteria;p__Firmicutes_A;c__Clostridia;o__Lachnospirales;f__Lachnospiraceae;g__Ruminococcus_B;s__Ruminococcus_B_gnavus	Ruminococcus_B	0	584	0	9270	0	0	0	0	0	3766	0	0	0	0	0	0	0	0	0	0	0	562	0	0	0	0	0	0	0	6124	411	0	0	0	0	1993	0	0	0	0	0	0	0	0	0	136	0	0
d__Bacteria;p__Firmicutes_C;c__Negativicutes;o__Veillonellales;f__Dialisteraceae;g__Dialister;s__Dialister_hominis	Dialister_.spp	0	120104	0	25866	0	0	0	0	733	212	0	3180	110720	58180	13182	24219	29961	166373	164035	49102	120167	102292	97774	0	0	0	0	0	0	199586	1176	0	22869	0	0	51610	0	37354	238415	2126	350001	13878	119481	0	8644	0	0	80170
d__Bacteria;p__Firmicutes;c__Bacilli;o__Lactobacillales;f__Streptococcaceae;g__Streptococcus;s__Streptococcus_acidominimus	Streptococcus_.spp	237070	165257	678371	6807	53729	218026	481033	8475	44857	46074	579	190520	41471	6345	6893	44703	6825	24902	853	1557	8865	453	24707	25285	79270	75528	548257	59531	54106	55714	11416	869573	56513	1636	44057	42692	11991	0	6103	0	131513	25	29110	905376	83764	552	0	1821
d__Bacteria;p__Firmicutes_A;c__Clostridia;o__Lachnospirales;f__Lachnospiraceae;g__Ruminococcus_B;s__Ruminococcus_B_gnavus	Ruminococcus_B_gnavus	0	20106	0	102061	0	0	0	0	0	76881	0	0	1790	177	0	0	0	0	0	436	0	18349	1246	4697	0	0	0	0	0	132910	24437	0	0	0	0	38615	1263	431	0	0	0	0	0	9943	8274	7014	7090	0
d__Bacteria;p__Actinobacteriota;c__Actinomycetia;o__Actinomycetales;f__Bifidobacteriaceae;g__Bifidobacterium;s__Bifidobacterium_actinocoloniiforme	Bifidobacterium_jacchi	1081	2769	121	2524	7971	4181	6179	134	2109	10116	0	2049	1472	0	3469	6384	638	2809	0	0	1069	0	188	2020	0	858	9457	4798	6793	796	2128	1544	1568	0	430	132	4213	0	445	591	4637	95	730	2367	1277	965	650	0
d__Bacteria;p__Firmicutes_A;c__Clostridia;o__Lachnospirales;f__Lachnospiraceae;g__Mediterraneibacter;s__Mediterraneibacter_caccavium	Mediterraneibacter_excrementigallinarum_A	0	0	0	70	0	0	0	0	0	0	175	0	192	332	0	0	0	0	87	0	0	519	319	0	0	0	0	0	0	71	0	0	0	0	0	35	0	351	0	0	0	209	0	0	53	915	0	0
d__Bacteria;p__Actinobacteriota;c__Coriobacteriia;o__Coriobacteriales;f__Atopobiaceae;g__Parolsenella;s__Parolsenella_catena	Parolsenella_uli_B	0	1265039	0	0	0	878	0	0	3958005	888467	0	31134	394756	0	624515	1373596	214492	262487	0	1440	265625	0	16272	894861	0	0	0	389715	1021796	0	0	0	0	0	0	133669	299	116	0	78128	369700	0	1819	0	0	0	0	0
d__Bacteria;p__Actinobacteriota;c__Coriobacteriia;o__Coriobacteriales;f__Coriobacteriaceae;g__Collinsella;s__Collinsella_bouchesdurhonensis	Collinsella_.spp	0	69566	0	13804	0	74423	10530	0	25449	0	14430	1233	40424	4932	45784	577231	64643	492239	3224	12653	96011	7416	64210	0	0	0	0	0	0	388517	62891	0	110390	0	16941	0	118908	74256	111091	34344	21066	9731	34518	0	0	110913	20422	3982
d__Bacteria;p__Actinobacteriota;c__Actinomycetia;o__Actinomycetales;f__Bifidobacteriaceae;g__Bifidobacterium;s__Bifidobacterium_actinocoloniiforme	Bifidobacterium_scardovii	4887	7801	314	73940	18824	12103	17129	347	7934	29390	0	3880	3039	0	12640	31210	1815	8670	0	0	5089	0	307	6289	0	5128	23294	13399	13125	6384	6040	3941	2968	0	77	345	24271	0	664	1360	21106	0	2164	13535	13269	3022	3521	0
d__Bacteria;p__Actinobacteriota;c__Actinomycetia;o__Actinomycetales;f__Bifidobacteriaceae;g__Bifidobacterium;s__Bifidobacterium_actinocoloniiforme	Bifidobacterium_xylocopae	198	403	0	280	693	344	314	34	292	794	0	42	152	0	380	591	0	273	0	0	136	0	0	179	0	204	911	403	604	77	212	120	120	0	25	0	383	0	16	0	433	0	68	154	154	121	8	0
d__Bacteria;p__Firmicutes;c__Bacilli;o__Erysipelotrichales;f__Coprobacillaceae;g__Erysipelatoclostridium;s__Erysipelatoclostridium_cocleatum	Erysipelatoclostridium_merdavium	0	0	0	0	0	0	0	0	0	672	0	0	0	0	0	181	0	0	0	0	0	0	0	149	0	0	0	0	0	794	865	0	0	0	0	0	1139	0	0	0	0	467	0	0	25	0	248	0
d__Bacteria;p__Actinobacteriota;c__Actinomycetia;o__Actinomycetales;f__Bifidobacteriaceae;g__Bifidobacterium;s__Bifidobacterium_actinocoloniiforme	Bifidobacterium_pullorum_C	494	1002	142	1107	2146	1159	1975	47	1062	2796	0	433	276	0	1436	2258	188	772	0	0	507	0	0	813	0	236	3086	1553	2012	415	563	494	345	0	295	11	1411	0	95	137	1916	0	177	556	368	287	186	0
d__Bacteria;p__Firmicutes_A;c__Clostridia;o__Lachnospirales;f__Lachnospiraceae;g__Muricomes;s__Muricomes_contortus_C	Muricomes_oroticus	0	0	0	0	0	0	0	0	0	0	0	0	0	191	0	0	0	0	0	0	0	55	165	0	0	0	0	0	0	0	0	0	0	0	0	0	0	0	0	0	0	0	0	0	0	1014	0	0
d__Bacteria;p__Firmicutes;c__Bacilli;o__Erysipelotrichales;f__Coprobacillaceae;g__Faecalibacillus;s__Faecalibacillus_faecis	Faecalibacillus_.spp	0	0	0	0	0	0	0	0	0	0	0	0	0	147	0	0	0	0	0	0	0	0	0	0	0	0	0	0	0	0	0	0	0	0	0	0	0	34	160	0	0	0	0	0	0	0	0	0
d__Bacteria;p__Actinobacteriota;c__Actinomycetia;o__Actinomycetales;f__Bifidobacteriaceae;g__Bifidobacterium;s__Bifidobacterium_actinocoloniiforme	Bifidobacterium_pullorum_B	2788	5320	79	2707	7141	4446	8534	210	3265	10218	0	1095	1736	0	4634	7324	1036	5027	0	0	1499	0	0	3196	0	1968	13355	5512	5863	1354	2280	1774	1561	0	525	183	5149	27	396	658	9869	0	1057	2265	1424	1359	1166	0
d__Bacteria;p__Actinobacteriota;c__Coriobacteriia;o__Coriobacteriales;f__Atopobiaceae;g__Parolsenella;s__Parolsenella_catena	Parolsenella_.spp	0	37983	0	0	0	1708	0	0	130107	24445	0	295	15280	0	18629	44579	5658	9950	0	0	8355	0	5029	30027	0	0	0	11887	33736	0	0	0	0	0	0	3342	411	0	0	2116	12083	0	3659	0	0	0	0	0
d__Bacteria;p__Bacteroidota;c__Bacteroidia;o__Bacteroidales;f__Bacteroidaceae;g__Prevotella;s__Prevotella_albensis	Prevotella_copri	0	218283	0	0	0	0	0	0	0	0	1371747	63381	672088	292669	14848	0	53141	489010	43348	189069	31229	152961	184991	0	0	0	0	0	0	10043	0	0	0	6266	0	0	39858	1101544	147863	112951	517044	0	2441416	0	0	279743	122575	801725
d__Bacteria;p__Actinobacteriota;c__Coriobacteriia;o__Coriobacteriales;f__Atopobiaceae;g__Parolsenella;s__Parolsenella_catena	Parolsenella_massiliensis	0	716	0	0	0	2645	0	0	317	969	0	0	5263	0	504	2077	535	1076	0	0	495	0	6395	361	0	0	0	187	1661	0	0	0	0	0	0	182	411	0	0	356	1183	0	3846	0	0	0	0	0
d__Bacteria;p__Firmicutes_A;c__Clostridia;o__Lachnospirales;f__Lachnospiraceae;g__Mediterraneibacter;s__Mediterraneibacter_caccavium	Mediterraneibacter_.spp	0	0	0	0	0	0	0	0	0	12	0	0	2776	115	225	0	0	0	3817	0	0	810	166	0	0	0	0	0	0	0	0	0	0	0	0	0	0	3199	0	593	0	1294	0	0	0	12249	753	0
d__Bacteria;p__Firmicutes_A;c__Clostridia;o__Lachnospirales;f__Lachnospiraceae;g__Enterocloster;s__Enterocloster_aldenensis	Enterocloster_bolteae	0	0	0	0	0	0	0	0	0	0	0	0	0	0	277	0	0	0	0	0	0	144	0	0	0	0	0	0	0	0	0	0	0	0	0	1664	6184	0	0	0	0	10078	0	0	2829	4331	0	0
d__Bacteria;p__Actinobacteriota;c__Coriobacteriia;o__Coriobacteriales;f__Atopobiaceae;g__Parolsenella;s__Parolsenella_catena	Parolsenella_uli_A	0	43153	0	0	0	383	0	0	138914	30469	0	666	15664	0	18561	52724	8272	14109	0	0	9314	0	2299	35748	0	0	0	14071	39349	0	0	0	0	0	0	4519	0	19	0	2883	14710	0	1243	0	0	0	0	0
d__Bacteria;p__Firmicutes_A;c__Clostridia;o__Lachnospirales;f__Lachnospiraceae;g__Mediterraneibacter;s__Mediterraneibacter_caccavium	Mediterraneibacter_pullicola	0	0	0	0	0	0	0	0	0	0	94	0	202	201	0	0	0	0	231	0	0	343	301	0	0	0	0	0	0	119	0	0	0	0	0	0	0	315	53	0	0	208	0	0	0	953	144	0
d__Bacteria;p__Actinobacteriota;c__Actinomycetia;o__Actinomycetales;f__Bifidobacteriaceae;g__Alloscardovia;s__Alloscardovia_criceti	Alloscardovia_macacae	1049	770	81	363	1723	882	890	146	868	1928	0	144	188	0	757	1323	162	740	0	0	601	0	0	471	0	723	1969	1138	1522	518	266	267	363	0	657	65	889	32	71	24	2424	0	191	499	406	280	216	0
d__Bacteria;p__Firmicutes;c__Bacilli;o__Erysipelotrichales;f__Erysipelotrichaceae;g__Clostridium_AQ;s__Clostridium_AQ_innocuum	Clostridium_.spp	58683	0	0	9718	0	2642	0	0	299	20491	0	0	1797	2905	0	0	0	0	0	0	0	1803	61168	0	1623287	0	0	0	0	27545	0	0	0	0	0	0	0	0	0	0	0	0	787	0	540	0	0	0
d__Bacteria;p__Actinobacteriota;c__Actinomycetia;o__Actinomycetales;f__Bifidobacteriaceae;g__Pseudoscardovia;s__Pseudoscardovia_radai	Pseudoscardovia_radai	555	867	22	550	2362	1068	1320	45	917	2988	0	518	373	0	1010	2198	135	934	0	0	482	0	0	671	0	744	2277	1485	1547	270	376	327	272	0	383	56	1229	0	113	204	1746	0	288	721	453	203	195	0
d__Bacteria;p__Firmicutes_C;c__Negativicutes;o__Acidaminococcales;f__Acidaminococcaceae;g__Acidaminococcus;s__Acidaminococcus_fermentans	Acidaminococcus_massiliensis	0	0	0	10768	0	0	0	0	0	34153	0	0	12749	0	90651	294053	11200	4187	0	0	467	0	0	0	0	0	0	0	0	7748	3832	9169	37020	0	0	7486	3295	0	0	80201	33111	286	4275	0	92789	0	0	0
d__Bacteria;p__Firmicutes_A;c__Clostridia;o__Lachnospirales;f__Lachnospiraceae;g__Mediterraneibacter;s__Mediterraneibacter_caccavium	Mediterraneibacter_massiliensis	0	0	0	15	0	0	0	0	0	0	60	0	107	31	0	0	0	0	76	0	0	31	170	0	0	0	0	0	0	92	0	0	0	0	0	0	0	262	0	0	0	77	0	0	0	931	0	0
d__Bacteria;p__Actinobacteriota;c__Actinomycetia;o__Actinomycetales;f__Bifidobacteriaceae;g__Bifidobacterium;s__Bifidobacterium_actinocoloniiforme	Bifidobacterium_actinocoloniiforme	552	289	16	271	516	413	410	25	348	888	0	50	110	0	205	766	58	231	0	0	85	0	0	328	0	441	709	295	560	332	103	211	76	0	67	0	335	0	0	0	396	0	59	211	127	25	51	0
d__Bacteria;p__Actinobacteriota;c__Actinomycetia;o__Actinomycetales;f__Bifidobacteriaceae;g__Bifidobacterium;s__Bifidobacterium_actinocoloniiforme	Bifidobacterium_dolichotidis	61	268	23	61	176	130	46	7	208	423	0	0	182	0	205	320	23	219	0	0	129	0	0	61	0	131	169	161	122	15	46	53	38	0	30	0	154	7	15	0	711	0	7	76	84	30	0	0
d__Bacteria;p__Firmicutes_A;c__Clostridia;o__Lachnospirales;f__Lachnospiraceae;g__Lachnospira;s__Lachnospira_eligens_A	Lachnospira_.spp	0	0	0	0	0	0	0	0	0	0	429	0	718	7134	0	0	0	117	471	23956	0	1951	32135	0	0	0	0	0	0	0	0	0	0	0	0	549204	0	0	1801	0	0	22723	0	0	0	0	0	0
d__Bacteria;p__Bacteroidota;c__Bacteroidia;o__Bacteroidales;f__Bacteroidaceae;g__Prevotella;s__Prevotella_albensis	Prevotella_.spp	0	488591	365	0	0	0	0	0	0	0	3084804	97316	1192592	2466455	31500	0	169408	2800057	369390	1430407	1743475	1352685	1249530	0	0	0	0	0	0	66265	0	0	0	0	0	978	333831	1935935	3379861	431019	284810	0	5558868	0	0	28580	14169	4393242
d__Bacteria;p__Firmicutes_C;c__Negativicutes;o__Veillonellales;f__Megasphaeraceae;g__Anaeroglobus;s__Anaeroglobus_geminatus	Anaeroglobus_vaginalis	0	728	0	26	0	0	0	0	0	1394	0	0	631	0	105	501	0	78	0	0	0	0	0	79	0	0	0	289	0	2552	131	0	26	0	0	52	674	0	0	1108	2643	0	315	347	660	0	0	0
d__Bacteria;p__Firmicutes;c__Bacilli;o__Erysipelotrichales;f__Erysipelotrichaceae;g__Clostridium_AQ;s__Clostridium_AQ_innocuum	Clostridium_Q_transplantifaecale	0	0	0	0	0	0	0	0	0	0	0	0	311	0	0	0	0	0	0	0	0	0	0	0	108	0	0	0	0	0	0	0	0	0	0	291	0	0	0	0	0	2453	0	0	0	638	165	0
d__Bacteria;p__Firmicutes_A;c__Clostridia;o__Lachnospirales;f__Lachnospiraceae;g__Mediterraneibacter;s__Mediterraneibacter_caccavium	Mediterraneibacter_ornithocaccae	0	0	0	0	0	0	0	0	0	0	234	0	253	237	0	63	0	0	47	0	0	632	288	0	0	0	0	0	0	77	0	0	0	0	0	0	0	384	0	0	0	302	0	0	0	1159	79	0
d__Bacteria;p__Actinobacteriota;c__Actinomycetia;o__Actinomycetales;f__Bifidobacteriaceae;g__Bifidobacterium;s__Bifidobacterium_actinocoloniiforme	Bifidobacterium_merycicum	3760	4566	142	1901	4325	5315	5306	120	2972	9255	0	436	2010	0	3707	6482	606	4427	0	0	2749	75	24	2897	0	2106	11396	3910	4781	2023	2676	1070	1182	0	852	258	4608	220	377	430	11168	0	1302	2874	1758	1120	892	0
d__Bacteria;p__Actinobacteriota;c__Actinomycetia;o__Actinomycetales;f__Bifidobacteriaceae;g__Bifidobacterium;s__Bifidobacterium_actinocoloniiforme	Bifidobacterium_pullorum	64	638	0	659	1559	1050	1341	0	738	2798	0	128	348	0	941	1891	142	752	0	0	235	0	0	774	0	208	1908	1211	1117	65	463	335	271	0	0	0	1331	0	0	223	1825	0	129	571	378	235	31	0
d__Bacteria;p__Firmicutes_C;c__Negativicutes;o__Veillonellales;f__Megasphaeraceae;g__Caecibacter;s__Caecibacter_hominis	Caecibacter_massiliensis	0	0	0	6863	0	0	0	0	0	10155	0	0	4636	0	5328	6851	313	536	0	0	315	0	1195	0	0	0	0	0	0	15843	4315	0	71	0	0	0	1769	0	526	10156	1891	0	211	0	872	0	0	0
d__Bacteria;p__Actinobacteriota;c__Actinomycetia;o__Actinomycetales;f__Bifidobacteriaceae;g__Bifidobacterium;s__Bifidobacterium_actinocoloniiforme	Bifidobacterium_leontopitheci	0	6040	0	3103	8793	7181	13844	0	3665	15282	0	6815	2538	0	6072	13868	1310	4765	0	12	1453	0	486	3027	0	613	17184	8237	9925	0	4304	2712	2455	0	0	124	5865	0	1881	2264	6388	247	1215	4210	2132	1037	797	0
d__Bacteria;p__Firmicutes_C;c__Negativicutes;o__Veillonellales;f__Veillonellaceae;g__Veillonella;s__Veillonella_atypica	Veillonella_rogosae	1268	8776	1985	0	0	47044	137779	0	4986	0	0	1158	0	0	0	106	0	0	0	175	252	721	2047	0	0	0	0	0	0	0	721	2682	0	0	0	3206	0	0	0	6561	8206	0	150	11248	14897	0	0	0
d__Bacteria;p__Bacteroidota;c__Bacteroidia;o__Bacteroidales;f__Bacteroidaceae;g__Prevotella;s__Prevotella_albensis	Prevotella_avicola	0	563	0	0	0	0	0	0	0	0	3292	0	2035	1872	0	0	0	2673	366	454	1224	1205	1321	0	0	0	0	0	0	0	0	0	0	0	0	0	131	3653	3429	369	284	0	6632	0	0	0	0	8279
d__Bacteria;p__Actinobacteriota;c__Actinomycetia;o__Actinomycetales;f__Bifidobacteriaceae;g__Bifidobacterium;s__Bifidobacterium_actinocoloniiforme	Bifidobacterium_angulatum	1609	3451	157	1244	2429	1798	1977	0	2131	4941	0	548	1587	0	3865	3079	776	3673	0	0	1910	4149	0	1369	0	773	3260	1951	1958	1195	726	367	418	0	436	157	1595	341	489	177	10686	0	789	1450	712	518	590	0
d__Bacteria;p__Actinobacteriota;c__Coriobacteriia;o__Coriobacteriales;f__Atopobiaceae;g__Paratractidigestivibacter;s__Paratractidigestivibacter_faecalis	Paratractidigestivibacter_faecalis	0	3536	0	0	0	234	0	0	214	119	0	0	31835	0	140	532	28948	5555	0	950	970	0	51535	23	0	0	0	0	23	0	0	0	0	0	0	0	0	4109	0	0	11626	0	3108	0	0	0	0	3355
d__Bacteria;p__Actinobacteriota;c__Actinomycetia;o__Actinomycetales;f__Bifidobacteriaceae;g__Bifidobacterium;s__Bifidobacterium_actinocoloniiforme	Bifidobacterium_bifidum	18451	416692	6867	197915	639979	538362	1011242	2702	235684	1166852	212	626096	207516	0	445135	870678	128324	356075	340	13172	113908	6984	58572	216996	0	55635	1300040	516962	620766	10240	304290	195425	199400	525	14653	26746	481888	6244	160788	170461	522350	30460	92072	303980	137922	79413	57368	0
d__Bacteria;p__Actinobacteriota;c__Actinomycetia;o__Actinomycetales;f__Bifidobacteriaceae;g__Bifidobacterium;s__Bifidobacterium_actinocoloniiforme	Bifidobacterium_thermophilum	0	1400	0	474	1453	1125	1136	0	1070	2431	0	216	575	0	1762	1947	240	1311	0	0	749	0	0	450	0	269	1510	1042	1332	217	137	108	238	0	0	0	997	0	159	27	2968	0	136	592	287	182	27	0
d__Bacteria;p__Firmicutes_A;c__Clostridia;o__Lachnospirales;f__Lachnospiraceae;g__UBA9414;s__UBA9414_sp003458885	UBA9414_.spp	0	0	0	0	0	0	0	0	0	0	330	0	326	437	0	93	0	0	0	0	0	199	563	0	0	0	0	0	0	778	0	0	0	0	0	16	0	252	181	0	0	252	0	0	30	406	0	0
d__Bacteria;p__Firmicutes_A;c__Clostridia;o__Lachnospirales;f__Lachnospiraceae;g__Hespellia;s__Hespellia_stercorisuis	Hespellia_stercorisuis	0	0	0	45	0	0	0	0	0	0	359	0	274	408	0	167	0	0	241	14	0	301	556	0	0	0	0	0	0	226	0	0	0	0	0	373	0	225	149	0	0	452	0	0	89	542	44	0
d__Bacteria;p__Firmicutes_C;c__Negativicutes;o__Veillonellales;f__Dialisteraceae;g__Allisonella;s__Allisonella_histaminiformans	Allisonella_histaminiformans	0	0	0	666	0	0	0	0	6566	8054	0	0	353	0	241	5278	0	1837	0	0	2407	0	0	0	0	0	0	7086	0	0	30464	30479	764	0	0	0	0	0	9020	6030	28375	0	5022	0	9419	0	0	0
d__Bacteria;p__Bacteroidota;c__Bacteroidia;o__Bacteroidales;f__Bacteroidaceae;g__Prevotella;s__Prevotella_albensis	Prevotella_albensis	0	737	0	0	0	0	0	0	0	0	6636	0	2303	3189	141	0	203	1824	717	1624	686	712	2200	0	0	0	0	0	0	20	0	0	0	0	0	0	163	4245	5198	996	824	0	6151	0	0	112	60	4672
d__Bacteria;p__Actinobacteriota;c__Actinomycetia;o__Actinomycetales;f__Bifidobacteriaceae;g__Bifidobacterium;s__Bifidobacterium_actinocoloniiforme	Bifidobacterium_crudilactis	514	505	0	322	323	65	174	0	217	1177	0	0	331	0	1255	433	87	424	0	0	219	0	0	326	0	242	368	414	197	322	44	65	86	0	43	0	216	0	0	0	1658	0	170	196	281	86	0	0
d__Bacteria;p__Actinobacteriota;c__Coriobacteriia;o__Coriobacteriales;f__Atopobiaceae;g__Thermophilibacter;s__Thermophilibacter_sp002407785	Thermophilibacter_.spp	0	248	0	0	0	0	0	0	124	40	0	0	1083	0	123	307	777	314	0	0	67	0	959	68	0	0	0	0	41	0	0	0	0	0	0	0	0	108	0	0	293	0	27	0	0	0	0	0
d__Bacteria;p__Bacteroidota;c__Bacteroidia;o__Bacteroidales;f__Bacteroidaceae;g__Prevotella;s__Prevotella_albensis	Prevotella_buccae	0	144	0	0	0	0	0	0	0	0	3789	0	1559	2223	0	4065	478	2129	256	0	1676	206	614	0	0	0	0	0	0	0	58229	67431	0	0	0	97286	146	3133	2292	282	72	32245	8281	0	62522	0	0	6419
d__Bacteria;p__Actinobacteriota;c__Actinomycetia;o__Actinomycetales;f__Bifidobacteriaceae;g__Bifidobacterium;s__Bifidobacterium_actinocoloniiforme	Bifidobacterium_ramosum	0	775	0	1144	272	288	366	0	280	865	0	78	172	0	829	1336	0	571	0	0	109	0	0	253	0	15	336	347	337	0	94	142	31	0	0	0	508	0	0	0	1142	0	0	255	204	31	0	0
d__Bacteria;p__Actinobacteriota;c__Actinomycetia;o__Actinomycetales;f__Bifidobacteriaceae;g__Bifidobacterium;s__Bifidobacterium_actinocoloniiforme	Bifidobacterium_aerophilum	0	269	0	653	47	141	172	0	190	623	0	0	78	0	252	774	0	288	0	0	126	0	0	95	0	0	174	80	219	0	48	0	15	0	0	0	417	0	0	0	558	0	0	143	239	0	0	0
d__Bacteria;p__Actinobacteriota;c__Actinomycetia;o__Actinomycetales;f__Bifidobacteriaceae;g__Bifidobacterium;s__Bifidobacterium_actinocoloniiforme	Bifidobacterium_vespertilionis	30	310	0	602	403	245	322	0	363	1166	0	136	94	0	577	686	0	437	0	0	124	0	0	108	0	123	359	322	324	30	153	61	46	0	0	0	416	0	0	0	1106	0	0	290	198	15	0	0
d__Bacteria;p__Bacteroidota;c__Bacteroidia;o__Bacteroidales;f__Bacteroidaceae;g__Prevotella;s__Prevotella_albensis	Prevotella_corporis	0	0	0	0	5038	0	0	0	0	5442	2187	0	1076	408	0	2115	0	438	0	0	60	0	136	0	0	0	0	0	0	0	0	0	0	0	0	0	0	459	87	0	114	0	553	855	1590	2373	0	807
d__Bacteria;p__Actinobacteriota;c__Actinomycetia;o__Actinomycetales;f__Bifidobacteriaceae;g__Aeriscardovia;s__Aeriscardovia_aeriphila	Aeriscardovia_aeriphila	420	287	17	130	222	219	116	35	186	542	0	0	70	0	300	287	44	322	0	0	297	0	0	123	0	312	296	302	197	201	71	97	53	0	45	0	211	17	0	0	710	0	43	184	44	44	17	0
d__Bacteria;p__Actinobacteriota;c__Actinomycetia;o__Actinomycetales;f__Bifidobacteriaceae;g__Bifidobacterium;s__Bifidobacterium_actinocoloniiforme	Bifidobacterium_cebidarum	5407	717	142	644	1336	1154	793	274	1227	2295	0	0	258	0	764	1483	70	600	0	0	357	0	0	1005	0	2708	1480	1034	889	1763	400	485	184	0	801	71	1474	0	0	0	1960	0	112	555	518	661	245	0
d__Bacteria;p__Actinobacteriota;c__Actinomycetia;o__Actinomycetales;f__Bifidobacteriaceae;g__Bifidobacterium;s__Bifidobacterium_actinocoloniiforme	Bifidobacterium_felsineum	10203	1924	794	1893	5676	2943	1918	434	3184	8280	0	235	644	0	2736	4333	467	1793	0	0	990	0	0	3479	0	8173	2773	3809	3062	5006	836	896	519	0	2265	183	2507	0	0	267	5621	0	320	2292	1745	1490	350	0
d__Bacteria;p__Firmicutes_A;c__Clostridia;o__Lachnospirales;f__Lachnospiraceae;g__Blautia;s__Blautia_coccoides	Blautia_A_avistercoris	0	0	0	0	0	0	0	0	0	0	110	0	125	16	0	31	0	0	63	0	0	255	48	0	0	0	0	0	0	192	0	0	0	0	0	0	16	126	204	0	0	191	31	0	0	222	16	0
d__Bacteria;p__Firmicutes_A;c__Clostridia;o__Lachnospirales;f__Lachnospiraceae;g__Sellimonas;s__Sellimonas_avistercoris	Sellimonas_.spp	0	0	0	566	0	0	0	0	0	0	63	0	189	172	0	38	0	0	12	0	0	149	346	0	0	0	0	0	0	212	0	0	0	0	0	100	89	194	25	0	0	187	0	0	0	925	235	0
d__Bacteria;p__Firmicutes_A;c__Clostridia;o__Lachnospirales;f__Lachnospiraceae;g__Mediterraneibacter;s__Mediterraneibacter_caccavium	Mediterraneibacter_glycyrrhizinilyticus_A	0	0	0	0	0	0	0	0	0	0	0	0	0	110	0	0	0	0	0	0	0	202	95	0	0	0	0	0	0	0	0	0	0	0	0	0	0	0	0	0	0	63	0	0	0	384	0	0
d__Bacteria;p__Actinobacteriota;c__Actinomycetia;o__Actinomycetales;f__Bifidobacteriaceae;g__Bifidobacterium;s__Bifidobacterium_actinocoloniiforme	Bifidobacterium_longum	2677272	634892	2801508	1267341	8644378	2380553	2669561	1644120	2929727	3588564	393	195200	108608	0	579745	2144955	185447	437817	3437	583	480914	2380	22660	1384024	6601	1015375	5679108	4925152	6231261	2293765	1232098	1701416	1202024	107701	7468617	118228	3592990	41111	28458	142594	1424782	31995	192133	1047963	777662	884061	300125	470
d__Bacteria;p__Firmicutes;c__Bacilli;o__Erysipelotrichales;f__Erysipelotrichaceae;g__Clostridium_AQ;s__Clostridium_AQ_innocuum	Clostridium_AQ	0	0	0	33103	0	0	0	0	0	0	0	0	0	0	0	0	1745	0	0	0	0	1698	0	14168	0	0	0	0	0	2493	0	0	0	0	0	0	9390	0	0	0	0	0	0	0	0	5510	0	0
d__Bacteria;p__Actinobacteriota;c__Actinomycetia;o__Actinomycetales;f__Bifidobacteriaceae;g__Bifidobacterium;s__Bifidobacterium_actinocoloniiforme	Bifidobacterium_myosotis	60796	10138	23296	15458	82739	30612	30102	15267	29028	54731	0	3052	3500	0	12941	31034	2698	8943	0	0	7101	0	142	20929	0	37131	50500	48789	65363	30517	11827	13900	10870	699	66646	1005	36393	399	530	2220	27258	348	2683	14015	11037	10697	3505	0
d__Bacteria;p__Firmicutes_A;c__Clostridia;o__Lachnospirales;f__Lachnospiraceae;g__Faecalimonas;s__Faecalimonas_phoceensis	Faecalimonas_phoceensis	0	0	0	0	0	0	0	0	0	0	0	0	0	0	0	0	0	359	0	0	0	0	0	41772	0	0	0	0	0	129036	0	0	0	0	0	0	0	0	0	0	0	0	0	0	0	0	0	0
d__Bacteria;p__Firmicutes_A;c__Clostridia;o__Lachnospirales;f__Lachnospiraceae;g__Sellimonas;s__Sellimonas_avistercoris	Sellimonas_avistercoris	0	0	0	2550	0	0	0	0	0	0	0	0	0	0	0	0	0	0	0	0	0	0	0	0	0	0	0	0	0	0	0	0	0	0	0	0	0	0	0	0	0	0	0	0	0	2343	1000	0
d__Bacteria;p__Firmicutes_A;c__Clostridia;o__Lachnospirales;f__Lachnospiraceae;g__Mediterraneibacter;s__Mediterraneibacter_caccavium	Mediterraneibacter_lactaris	0	491	0	0	0	0	0	0	0	113	1514	0	1443	3032	0	407	0	135	2058	56	0	58142	2516	0	0	0	0	0	0	456	85	0	0	0	0	396	376	26918	1523	0	0	19817	491	0	992	5676	246	0
d__Bacteria;p__Firmicutes_A;c__Clostridia;o__Lachnospirales;f__Lachnospiraceae;g__Anaerostipes;s__Anaerostipes_butyraticus	Anaerostipes_butyraticus	0	0	0	0	0	0	0	0	0	0	124	0	341	128	359	142	0	0	14	0	0	240	1221	0	0	0	0	0	0	56	0	0	0	0	0	1024	0	844	492	0	0	210	0	144	156	902	2086	0
d__Bacteria;p__Actinobacteriota;c__Actinomycetia;o__Actinomycetales;f__Bifidobacteriaceae;g__Bifidobacterium;s__Bifidobacterium_actinocoloniiforme	Bifidobacterium_bohemicum	4901	3002	1117	1880	7648	2908	4065	979	2832	6353	0	800	1041	0	2152	3829	564	2412	0	0	1268	32	40	1955	0	2888	6206	4480	5147	2296	1687	1448	995	0	3853	186	3745	250	360	333	5496	0	550	1555	972	676	511	0
d__Bacteria;p__Actinobacteriota;c__Actinomycetia;o__Actinomycetales;f__Bifidobacteriaceae;g__Galliscardovia;s__Galliscardovia_catulorum	Galliscardovia_primatium	0	681	0	596	1118	632	1038	0	515	1375	0	185	218	0	927	1345	134	528	0	0	216	0	0	548	0	285	1462	1073	957	150	398	268	165	0	50	0	563	0	0	0	999	0	164	284	299	186	182	0
d__Bacteria;p__Actinobacteriota;c__Actinomycetia;o__Actinomycetales;f__Bifidobacteriaceae;g__Bifidobacterium;s__Bifidobacterium_actinocoloniiforme	Bifidobacterium_minimum	4115	3796	723	1986	8593	3358	5301	661	2882	7509	0	1675	1707	0	3453	5117	803	3018	0	0	1947	17	223	2013	0	3270	8067	4642	6393	1497	1836	1595	1312	0	3335	198	3841	288	809	558	6603	68	693	1912	906	1038	415	0
d__Bacteria;p__Firmicutes;c__Bacilli;o__Erysipelotrichales;f__Coprobacillaceae;g__Erysipelatoclostridium;s__Erysipelatoclostridium_cocleatum	Erysipelatoclostridium_ramosum	0	725	0	7572	0	0	0	0	0	29920	0	0	0	0	166	14735	943	53	0	0	0	0	0	12921	0	0	0	0	0	29891	31990	0	4550	0	0	4326	34673	0	0	0	0	18358	0	8248	10414	6193	3259	0
d__Bacteria;p__Actinobacteriota;c__Actinomycetia;o__Actinomycetales;f__Bifidobacteriaceae;g__Parascardovia;s__Parascardovia_denticolens	Parascardovia_denticolens	5275	1941	328	880	2526	2338	2357	434	1816	4049	0	564	861	0	1653	2938	334	1636	0	0	1047	0	20	1498	0	4873	4389	2359	3116	1571	834	653	812	0	2027	160	2430	40	200	130	3808	0	554	1179	820	489	375	0
d__Bacteria;p__Actinobacteriota;c__Actinomycetia;o__Actinomycetales;f__Bifidobacteriaceae;g__Bifidobacterium;s__Bifidobacterium_actinocoloniiforme	Bifidobacterium_hapali	534	1649	33	568	934	487	853	0	619	1613	0	77	863	0	1611	992	166	1454	0	0	1296	0	11	459	0	540	1361	831	750	324	344	123	247	0	67	78	594	209	221	0	4443	0	262	269	166	122	209	0
d__Bacteria;p__Actinobacteriota;c__Actinomycetia;o__Actinomycetales;f__Bifidobacteriaceae;g__Bifidobacterium;s__Bifidobacterium_actinocoloniiforme	Bifidobacterium_saguini	40246	7317	8032	7150	28414	14540	12085	5870	15801	24447	0	984	2461	0	7004	15562	1159	4988	0	0	3938	0	16	9320	0	43729	29248	25106	24972	16620	5499	7340	3899	218	24300	786	17044	404	443	830	16859	66	1579	7506	5410	5959	1550	0
d__Bacteria;p__Actinobacteriota;c__Actinomycetia;o__Actinomycetales;f__Bifidobacteriaceae;g__Bifidobacterium;s__Bifidobacterium_actinocoloniiforme	Bifidobacterium_mongoliense	25413	11865	14102	10959	45155	20745	28389	7213	19945	42993	0	5403	4933	0	11981	28402	2860	10265	0	0	7476	61	452	13329	0	12688	43281	31782	31988	15289	11449	10171	8287	225	28344	1027	25477	646	1368	1985	26940	284	2962	11607	7640	7010	3074	0
d__Bacteria;p__Bacteroidota;c__Bacteroidia;o__Bacteroidales;f__Bacteroidaceae;g__Prevotella;s__Prevotella_albensis	Prevotella_copri_A	0	222926	0	0	0	0	0	0	0	0	2587062	0	226163	531830	20209	0	852	602731	315494	4029912	382420	379599	893641	0	0	0	0	0	0	119831	0	0	0	0	0	0	140205	1660246	2520063	533181	236996	0	823502	0	0	0	0	1277120
d__Bacteria;p__Actinobacteriota;c__Actinomycetia;o__Actinomycetales;f__Bifidobacteriaceae;g__Bifidobacterium;s__Bifidobacterium_actinocoloniiforme	Bifidobacterium_bombi	2041	2143	128	552	1750	1453	1608	187	1213	2698	0	424	934	0	1468	1924	340	1484	0	0	1029	7	37	761	0	2363	2463	1558	1755	736	488	461	462	0	780	134	1431	373	377	194	3083	7	349	866	500	384	230	0
d__Bacteria;p__Actinobacteriota;c__Actinomycetia;o__Actinomycetales;f__Bifidobacteriaceae;g__Bifidobacterium;s__Bifidobacterium_actinocoloniiforme	Bifidobacterium_goeldii	2243	2274	240	1604	3387	2356	4164	103	1665	6352	0	904	1420	0	2924	4258	545	2486	0	0	1665	0	72	1820	0	2546	5439	3513	3591	1062	1230	837	996	0	302	124	2674	394	539	269	5139	51	520	1888	1011	594	481	0
d__Bacteria;p__Bacteroidota;c__Bacteroidia;o__Bacteroidales;f__Bacteroidaceae;g__Phocaeicola;s__Phocaeicola_abscessus	Phocaeicola_coprocola	0	230	0	0	0	0	0	0	0	0	606	0	599	0	1164	0	0	39	0	1653	0	649	442	1363	0	0	0	0	0	0	0	0	0	518	0	0	0	6661	121	2842	0	663	0	0	0	2739	2005	0
d__Bacteria;p__Actinobacteriota;c__Actinomycetia;o__Actinomycetales;f__Bifidobacteriaceae;g__Bifidobacterium;s__Bifidobacterium_actinocoloniiforme	Bifidobacterium_indicum	455	347	0	179	291	293	250	0	270	681	0	0	61	0	363	440	26	360	0	0	198	0	0	218	0	285	548	455	331	206	95	104	86	0	123	0	280	8	0	0	538	0	34	233	148	147	43	0
d__Bacteria;p__Actinobacteriota;c__Actinomycetia;o__Actinomycetales;f__Bifidobacteriaceae;g__Bifidobacterium;s__Bifidobacterium_actinocoloniiforme	Bifidobacterium_aemilianum	4251	2537	922	1377	4908	2604	3113	772	2319	5144	0	582	736	0	1910	3642	491	1691	0	0	1138	0	0	1774	0	4228	4406	3193	3535	1866	1149	1194	756	0	2861	79	2937	101	225	262	5067	0	323	1293	875	770	427	0
d__Bacteria;p__Bacteroidota;c__Bacteroidia;o__Bacteroidales;f__Bacteroidaceae;g__Phocaeicola;s__Phocaeicola_abscessus	Phocaeicola_gallinaceus	0	268	0	0	0	0	0	0	0	0	833	0	631	0	1229	0	0	261	0	1940	0	867	523	1126	0	0	0	0	0	0	0	0	0	1674	0	0	131	7106	264	3318	0	659	0	0	0	1695	1708	0
d__Bacteria;p__Actinobacteriota;c__Actinomycetia;o__Actinomycetales;f__Bifidobacteriaceae;g__Bifidobacterium;s__Bifidobacterium_actinocoloniiforme	Bifidobacterium_choloepi	715	836	101	882	1112	782	900	40	789	1796	0	261	436	0	715	1424	130	887	0	0	478	0	0	484	0	617	1157	943	989	333	299	239	202	0	71	60	960	0	191	101	1921	0	179	669	337	220	250	0
d__Bacteria;p__Actinobacteriota;c__Actinomycetia;o__Actinomycetales;f__Bifidobacteriaceae;g__Bifidobacterium;s__Bifidobacterium_actinocoloniiforme	Bifidobacterium_reuteri	73315	13309	23098	15860	95309	29197	32037	15734	33773	53936	0	3606	4777	0	11748	32020	2661	9645	0	0	8106	0	421	21679	0	63064	60599	50891	61622	32514	12434	14459	11615	485	65597	1829	37549	653	712	2144	28739	230	3181	14731	11545	9924	3893	0
d__Bacteria;p__Actinobacteriota;c__Actinomycetia;o__Actinomycetales;f__Bifidobacteriaceae;g__Bifidobacterium;s__Bifidobacterium_actinocoloniiforme	Bifidobacterium_commune	2943	1457	199	906	1463	1113	951	114	1100	2731	0	161	939	0	1894	2019	230	1628	0	0	957	0	30	1019	0	3228	2146	1595	1192	924	316	238	306	0	455	92	1134	200	255	46	4168	0	175	785	521	279	197	0
d__Bacteria;p__Bacteroidota;c__Bacteroidia;o__Bacteroidales;f__Bacteroidaceae;g__Bacteroides;s__Bacteroides_acidifaciens	Bacteroides_ihuae	0	365	0	0	0	0	0	0	0	0	611	0	756	142	678	0	0	259	47	1036	0	683	461	1885	0	0	0	0	0	0	0	0	0	310	0	0	477	1283	427	1855	0	524	0	0	0	903	1061	0
d__Bacteria;p__Actinobacteriota;c__Actinomycetia;o__Actinomycetales;f__Bifidobacteriaceae;g__Bifidobacterium;s__Bifidobacterium_actinocoloniiforme	Bifidobacterium_scaligerum	58646	13209	36813	16498	108530	33798	34000	18424	38959	52870	0	3414	3912	0	15162	30693	2619	11317	0	0	10069	0	358	20409	0	48348	68059	66082	73555	34246	17206	22999	13922	1086	78418	1868	47085	1312	715	2041	30108	582	2793	15104	11424	11056	4522	0
d__Bacteria;p__Bacteroidota;c__Bacteroidia;o__Bacteroidales;f__Bacteroidaceae;g__Phocaeicola;s__Phocaeicola_abscessus	Phocaeicola_merdavium	0	235	0	0	0	0	0	0	0	0	354	0	410	0	707	0	0	157	0	695	0	562	370	436	0	0	0	0	0	0	0	0	0	317	0	0	0	2110	39	1289	0	58	0	0	0	432	527	0
d__Bacteria;p__Actinobacteriota;c__Actinomycetia;o__Actinomycetales;f__Bifidobacteriaceae;g__Bifidobacterium;s__Bifidobacterium_actinocoloniiforme	Bifidobacterium_magnum	1825	2498	620	792	2318	1419	1636	349	1940	3832	0	314	977	0	2169	2710	335	2671	0	8	1784	8	102	928	0	1144	3142	2561	3202	1091	894	598	555	0	1925	103	1908	430	300	119	4530	0	588	970	544	534	473	0
d__Bacteria;p__Actinobacteriota;c__Actinomycetia;o__Actinomycetales;f__Bifidobacteriaceae;g__Pseudoscardovia;s__Pseudoscardovia_radai	Pseudoscardovia_suis	3445	3507	1182	1728	6016	4392	4916	122	3172	8131	0	1184	1479	0	4298	6203	894	3133	0	0	1531	0	139	2275	0	1967	7723	5541	4996	1907	2048	1730	1408	0	1016	172	3562	282	589	523	7760	0	1449	2535	1242	1381	1283	0
d__Bacteria;p__Firmicutes_A;c__Clostridia;o__Lachnospirales;f__Lachnospiraceae;g__Mediterraneibacter;s__Mediterraneibacter_caccavium	Mediterraneibacter_A_butyricigenes	0	163	0	194	0	0	0	0	0	276	1182	0	1042	1644	0	656	0	485	1168	226	540	1214	2769	16	0	0	0	0	0	844	98	0	0	0	0	337	398	1004	454	0	0	1095	65	67	289	1814	224	0
d__Bacteria;p__Bacteroidota;c__Bacteroidia;o__Bacteroidales;f__Bacteroidaceae;g__Bacteroides;s__Bacteroides_acidifaciens	Bacteroides_graminisolvens	0	1896	0	0	0	0	0	490	0	0	1728	0	3270	392	2867	0	394	1011	0	3415	0	2367	2503	6791	0	0	0	0	0	0	723	0	0	606	0	125	2615	5394	1747	8053	0	1646	0	0	0	3389	2855	0
d__Bacteria;p__Firmicutes_A;c__Clostridia;o__Lachnospirales;f__Lachnospiraceae;g__Anaerostipes;s__Anaerostipes_butyraticus	Anaerostipes_.spp	0	0	0	0	0	0	0	0	0	0	449	0	2755	2952	16880	295	0	1691	31	3070	0	6469	13047	0	0	0	0	0	0	231	0	0	0	0	0	19454	0	12264	8596	0	0	1332	0	3966	4511	10514	88809	0
d__Bacteria;p__Actinobacteriota;c__Actinomycetia;o__Actinomycetales;f__Bifidobacteriaceae;g__Bifidobacterium;s__Bifidobacterium_actinocoloniiforme	Bifidobacterium_tsurumiense	4086	3977	1054	1295	4291	2423	2329	505	2531	4510	0	219	1710	0	3475	3184	572	3588	0	14	3345	29	86	1804	0	3534	4276	3455	3610	2596	1366	1115	586	0	1298	171	3121	891	697	184	10712	0	416	1459	776	903	410	0
d__Bacteria;p__Bacteroidota;c__Bacteroidia;o__Bacteroidales;f__Bacteroidaceae;g__Phocaeicola;s__Phocaeicola_abscessus	Phocaeicola_ilei	0	784	0	0	0	0	0	0	0	0	1684	0	2115	512	3413	0	31	1015	96	4343	0	2420	1886	4050	0	0	0	0	0	0	0	0	0	5231	0	0	281	11149	1409	7491	0	2705	0	0	0	4496	6416	0
d__Bacteria;p__Actinobacteriota;c__Actinomycetia;o__Actinomycetales;f__Bifidobacteriaceae;g__Bifidobacterium;s__Bifidobacterium_actinocoloniiforme	Bifidobacterium_.spp	49454	37144	12353	16447	61927	30702	37458	7915	27310	61736	0	6546	17448	0	31210	43555	5840	35128	99	822	28726	2311	1596	20274	618	37936	61906	41660	49744	23904	13796	15373	10370	143	32526	2963	34012	9107	7186	3042	97589	118	11179	15388	11432	9331	9931	0
d__Bacteria;p__Actinobacteriota;c__Actinomycetia;o__Actinomycetales;f__Bifidobacteriaceae;g__Bifidobacterium;s__Bifidobacterium_actinocoloniiforme	Bifidobacterium_cuniculi	2406	1317	288	1024	1190	1640	731	171	1594	3181	0	179	401	0	978	2015	136	1008	0	0	428	0	0	1023	0	1494	940	1604	1233	1743	456	527	271	0	316	22	1488	0	90	68	2455	0	407	745	780	559	261	0
d__Bacteria;p__Actinobacteriota;c__Actinomycetia;o__Actinomycetales;f__Bifidobacteriaceae;g__Bifidobacterium;s__Bifidobacterium_actinocoloniiforme	Bifidobacterium_gallicum	4993	2591	1314	1348	4653	2311	2615	846	2437	4360	0	278	1118	0	1944	2890	309	2350	0	58	2200	8	116	1442	0	3287	4497	3828	3458	2218	1153	1017	633	0	2559	238	2332	810	499	269	5819	0	406	1206	1186	731	346	0
d__Bacteria;p__Bacteroidota;c__Bacteroidia;o__Bacteroidales;f__Bacteroidaceae;g__OM05-12;s__OM05-12_sp003438995	OM05-12_.spp	0	2033	0	34	0	0	0	766	0	0	3723	0	3622	886	4764	0	661	1572	529	6381	0	4470	3235	9457	0	0	0	0	0	0	100	0	0	2853	0	170	3198	9858	2435	11028	0	2593	0	0	0	6416	5168	0
d__Bacteria;p__Firmicutes_A;c__Clostridia;o__Lachnospirales;f__Lachnospiraceae;g__Schaedlerella;s__Schaedlerella_glycyrrhizinilytica_A	Schaedlerella_.spp	0	1467	0	232	0	0	0	0	0	306	5543	0	5770	3661	183	2282	0	282	351	719	2311	5559	5717	0	0	0	0	0	0	1531	213	0	0	0	0	572	77	2679	2116	0	200	7423	2537	0	4417	4204	360	0
d__Bacteria;p__Bacteroidota;c__Bacteroidia;o__Bacteroidales;f__Bacteroidaceae;g__Bacteroides;s__Bacteroides_acidifaciens	Bacteroides_helcogenes	0	1328	0	175	0	0	0	1266	0	0	1662	0	1253	3072	4246	0	806	1811	758	7887	0	1902	2246	2874	0	0	0	0	0	0	2175	0	0	234	258	1117	1778	9091	1034	2905	96	1354	0	0	0	8237	14976	0
d__Bacteria;p__Bacteroidota;c__Bacteroidia;o__Bacteroidales;f__Bacteroidaceae;g__Bacteroides;s__Bacteroides_acidifaciens	Bacteroides_salyersiae	0	5548	0	0	0	0	0	10247	0	0	6893	0	7608	1828	5820	0	8491	3999	1182	11464	0	7765	9306	21943	0	0	0	0	0	0	14014	0	0	989	430	7727	11165	42468	4541	15156	0	10076	0	0	0	14321	6955	0
d__Bacteria;p__Bacteroidota;c__Bacteroidia;o__Bacteroidales;f__Bacteroidaceae;g__Bacteroides;s__Bacteroides_acidifaciens	Bacteroides_cutis	0	5387	0	3467	0	0	0	9106	0	0	6269	0	7284	5492	11075	0	7871	4839	1479	22053	0	8361	7856	17644	0	0	0	0	0	0	12939	0	0	3285	764	7533	12405	36221	5447	18836	399	6407	0	0	0	15577	22382	0
	non-significant
	UBA7748_.spp	0	175	0	0	0	0	0	0	294	270	0	0	210	0	199	535	127	222	0	0	153	0	103	58	0	0	0	0	105	0	0	0	0	0	0	0	23	0	0	46	186	0	23	0	0	0	0	0
	UBA7741_.spp	0	1031	0	0	0	0	0	0	3831	748	0	0	666	0	371	1460	316	296	0	0	309	0	138	543	0	0	0	165	496	0	0	0	0	0	0	55	0	0	0	110	313	0	0	0	0	0	0	0
	Coriobacterium_glomerans	0	244	0	0	0	43	0	0	205	8	0	0	126	0	154	942	101	712	0	0	151	0	84	0	0	0	0	0	0	181	0	0	17	0	0	0	77	51	25	0	17	0	0	0	0	0	0	0
	Prevotella_dentasini	0	133	0	0	0	0	0	0	0	0	650	0	368	824	0	0	0	1897	0	21	763	358	140	0	0	0	0	0	0	0	0	0	0	0	0	0	97	631	546	10	0	0	1769	0	0	0	0	2341
	Rothia_.spp	242001	14460	575593	0	35688	155	28740	1285	0	299	0	5956	0	0	0	0	0	0	0	0	0	0	0	0	35533	48809	168285	9317	1095	0	0	14733	13375	1697	146	0	0	0	0	0	14314	0	0	34954	896	0	0	0
	Bifidobacterium_biavatii	0	182	0	444	123	181	30	0	133	687	0	0	136	0	309	496	0	256	0	0	105	0	0	90	0	0	179	150	253	0	0	0	15	0	0	0	312	0	0	0	629	0	0	105	60	0	0	0
	Prevotella_multisaccharivorax	0	12	0	0	0	0	0	0	0	0	480	0	490	595	0	0	0	778	25	37	859	256	124	0	0	0	0	0	0	0	0	0	0	0	0	0	49	800	438	24	0	0	1883	0	0	0	0	3414
	Streptococcus_saliviloxodontae	392	233	807	0	18	85	592	0	105	0	0	111	0	0	0	95	0	0	0	0	0	0	0	0	130	37	651	0	65	0	0	581	0	0	0	0	0	0	0	0	37	0	0	658	19	0	0	0
	Prevotella_bryantii	0	208	0	0	0	0	0	0	0	0	3108	0	1836	2084	0	0	89	890	212	150	151	415	997	0	0	0	0	0	0	0	0	0	0	0	0	0	0	2857	2553	248	122	0	2952	0	0	0	0	1635
	Prevotella_hominis	0	861	0	0	0	0	0	0	0	0	15105	0	10613	14402	1045	0	2814	7082	9616	0	4709	877	4196	0	0	0	0	0	0	186	0	0	0	0	0	0	897	40039	33873	2861	3783	0	16464	0	0	679	0	40508
	Olsenella_F_massiliensis	0	558	0	0	0	0	0	0	1006	408	0	0	437	0	325	1081	189	346	0	0	42	0	135	362	0	0	0	179	247	0	0	0	0	0	0	0	0	0	0	0	310	0	0	0	0	0	0	0
	Olsenella_H_porci	0	158	0	0	0	0	0	0	2735	4476	0	0	222	0	8846	1889	142	171	0	0	109	0	283	0	0	0	0	0	0	0	1205	0	0	0	0	0	0	0	0	2120	47	0	0	0	0	0	0	0
	Mesosutterella_multiformis	0	0	0	10731	0	0	0	46786	135675	80726	0	63910	0	0	0	342517	0	0	0	0	0	0	0	153393	0	0	0	3018	0	2617	135419	141073	96017	0	0	0	0	0	12691	0	23361	0	0	18193	617184	0	0	0
	Prevotella_ihumii	0	0	0	0	0	0	0	0	0	0	331	0	287	320	0	0	0	300	0	22	199	55	32	0	0	0	0	0	0	0	0	0	0	0	0	0	0	421	110	55	0	0	572	0	0	0	0	496
	Prevotella_bergensis	0	0	0	0	0	0	0	0	1604	0	604	0	701	591	0	0	0	1015	0	78	471	318	46	0	0	0	0	0	0	0	1653	0	0	0	0	0	0	1187	267	0	0	0	2171	0	0	47	0	3432
	Streptococcus_peroris	20727	1874	5049	0	5968	0	6079	2624	0	0	0	2156	0	0	0	384	0	0	0	0	0	0	0	0	0	0	45536	76	643	651	0	2293	3113	0	0	1300	0	0	0	0	8289	0	0	1947	26	0	0	0
	Collinsella_vaginalis	0	272	0	0	0	0	0	0	397	0	0	0	191	0	192	8558	363	6696	0	0	1401	0	817	0	0	0	0	0	0	677	0	0	47	0	0	0	195	95	0	109	127	0	0	0	0	0	0	0
	Bifidobacterium_callitrichos	0	248	0	354	82	83	163	0	192	846	0	0	83	0	357	605	0	109	0	0	0	0	0	331	0	0	303	137	223	0	82	0	0	0	0	0	302	0	0	0	250	0	0	82	0	138	0	0
	Duodenibacillus_massiliensis	0	0	0	0	0	0	0	0	0	0	1552	0	0	0	1275	0	50550	0	6882	0	4834	514	643	0	0	0	0	0	0	0	0	0	0	0	0	726815	18313	12077	0	45996	52624	52934	1666	0	0	0	0	13631
	Parafannyhessea_umbonata_A	0	190	0	0	0	0	0	0	320	18	0	0	666	0	205	844	167	463	0	0	168	0	295	37	0	0	0	0	0	0	0	0	0	0	0	0	0	0	0	0	258	0	0	0	0	0	0	0
	Prevotella_brunnea	0	0	0	0	0	0	0	0	0	0	198	0	167	305	0	0	0	237	0	0	108	0	56	0	0	0	0	0	0	2536	4095	0	0	0	0	0	0	492	42	0	0	0	563	0	0	0	0	552
	Bifidobacterium_globosum	785	2381	0	1390	2249	1754	2825	0	2100	4477	0	365	711	0	1965	2674	318	2011	0	0	1329	0	0	1078	0	634	4004	2329	2718	685	929	782	358	0	22	0	1703	22	223	115	4415	0	266	1166	852	359	331	0
	Dorea_A_longicatena	0	502	0	0	0	0	0	0	4325	0	2395	0	32856	4094	656	27680	831	2923	1338	2257	34151	5103	10619	833	0	0	0	0	0	0	4808	0	157889	0	0	30	0	2442	29527	0	1020	1184	3196	0	0	16223	0	0
	Bifidobacterium_boum	237	938	0	347	334	789	353	0	617	1673	0	0	449	0	981	834	59	1048	0	0	442	0	0	232	0	217	435	508	396	237	159	40	19	0	0	0	507	0	0	0	2240	0	0	384	100	58	0	0
	Olsenella_I_phocaeensis	0	95	0	0	0	0	0	0	395	146	0	0	258	0	254	547	66	133	0	0	13	0	107	27	0	0	0	0	0	0	0	0	0	0	0	0	0	0	0	0	26	0	0	0	0	0	0	0
	Bifidobacterium_aesculapii	0	57	0	289	43	28	113	0	57	573	0	0	0	0	276	370	0	159	0	0	0	0	0	129	0	0	43	155	28	14	0	0	0	0	0	0	243	0	0	0	172	0	28	100	42	71	43	0
	Prevotella_seregens	0	248	0	0	0	0	0	0	0	0	903	0	492	788	0	0	0	2446	0	0	1117	364	0	0	0	0	0	0	0	0	0	0	0	0	0	1207	0	481	251	0	0	0	3134	0	0	0	0	13187
	Dialister_hominis	0	560	0	0	0	0	0	0	0	0	0	0	586	0	0	0	0	546	358	0	337	57	223	0	0	0	0	0	0	618	0	0	0	0	0	0	0	0	875	0	2362	0	617	0	0	0	0	114
	Parafannyhessea_.spp	0	307	0	0	0	0	0	0	1319	376	0	0	466	0	528	1323	88	469	0	0	89	0	325	66	0	0	0	0	156	0	0	0	0	0	0	0	0	0	0	0	176	0	0	0	0	0	0	0
	Bifidobacterium_catenulatum	61	394333	0	3304	841	240	153	0	27790	1195	1449	0	251735	1268	289489	17693	44213	420475	13305	31678	464137	26084	19889	152	0	0	520	1156	498	3847	270	87	3510	0	0	39835	1670	306268	120932	0	1542479	0	19154	118	146	61	1299	1948
	Senegalimassilia_.spp	0	3395	0	0	0	0	0	0	0	0	0	0	2037	625	2354	0	0	679	0	0	1875	1358	605	0	0	0	0	626	0	0	2716	0	0	0	0	0	0	2716	0	0	4753	0	679	0	0	0	0	0
	Dorea_formicigenerans	0	13949	0	0	0	0	0	0	107	40956	3650	0	50128	6672	31803	50404	7555	15261	7689	4845	6366	12126	53999	15179	0	0	0	0	0	41773	36	0	761	0	0	21131	115884	4905	11065	0	3556	6468	6220	156996	15528	14712	4695	822
	Bifidobacterium_psychraerophilum	280	437	0	176	214	151	21	1380	455	925	0	0	238	0	546	652	0	540	0	0	345	0	0	151	0	349	300	559	194	89	0	0	0	0	0	0	150	0	0	0	1348	0	0	278	215	0	0	0
	Holdemanella_biformis	0	0	0	0	0	0	0	0	0	0	76780	0	0	12055	0	0	0	376	5242	7328	11606	72189	1412	0	0	0	0	0	0	0	0	0	0	0	0	0	0	1315	0	6547	1401	0	2706	97201	37462	0	0	0
	UBA4372_.spp	0	0	0	0	0	0	0	0	0	0	280	0	236	417	0	0	0	407	0	25	51	63	0	0	0	0	0	0	0	0	0	0	0	0	0	0	0	306	51	0	0	0	305	0	0	0	0	827
	Streptococcus_mitis_BM	14521	625	5280	0	4400	1458	10560	1936	0	0	0	2400	437	0	0	0	0	0	0	0	0	0	0	0	0	1812	13201	0	3600	2283	452	5280	1800	0	0	935	1272	0	0	0	0	0	0	0	0	0	0	0
	Collinsella_provencensis	0	143	0	0	0	32	0	0	0	0	0	0	126	0	0	543	74	474	0	0	97	0	181	0	0	0	0	0	0	312	0	0	86	0	0	0	108	108	32	0	0	0	10	0	0	42	0	0
	Senegalimassilia_anaerobia	0	18189	0	0	0	0	0	0	0	0	0	0	7918	0	22338	0	0	2544	0	0	790	3645	528	0	0	0	0	0	0	0	10301	0	0	0	0	7674	0	3766	0	0	22338	0	9198	0	0	0	0	0
	Limicola_.spp	0	109	0	0	0	0	0	0	0	0	0	0	120	0	66	367	11	421	0	0	65	0	88	0	0	0	0	0	0	89	0	0	33	0	0	0	0	44	0	0	0	0	0	0	0	0	0	0
	Prevotella_marshii	0	0	0	0	0	0	0	0	0	0	278	0	168	461	0	0	0	590	0	61	148	12	0	0	0	0	0	0	0	0	0	0	0	0	0	0	0	475	82	0	0	0	732	0	0	0	0	615
	Coprousia_.spp	0	381	0	0	0	0	0	0	79	0	0	0	147	0	131	1733	184	1693	0	0	269	0	116	0	0	0	0	0	0	505	0	0	0	0	0	0	107	0	0	0	0	0	0	0	0	13	0	0
	Dorea_A_longicatena_B	0	6564	0	0	0	0	0	0	52134	0	22048	0	65165	28537	0	316128	20888	35658	12348	33943	4650	3746	111729	12548	0	0	0	0	0	0	62343	0	17813	0	0	0	98	27457	12529	0	19767	12873	48186	0	0	172019	969	4445
	Streptococcus_orisratti	1336	791	4709	0	279	688	2147	0	301	0	0	497	0	0	0	242	0	0	0	0	0	0	0	0	2855	148	2404	132	81	0	0	3144	13	0	0	0	0	0	0	0	358	0	0	2767	53	0	0	0
	Rothia_mucilaginosa_A	19157	1783	40610	0	1777	0	416	0	0	0	0	94	0	0	0	0	0	0	0	0	0	0	0	0	1517	4395	13461	83	0	0	0	618	428	0	0	0	0	0	0	0	396	0	0	2516	0	0	0	0
	Catenibacterium_.spp	0	15021	0	0	0	0	0	0	0	0	70838	0	23440	121110	0	0	0	41879	0	3318	441	0	1565	0	0	0	0	0	0	0	0	0	0	0	0	0	0	33293	0	0	99	0	39119	0	0	0	0	2610
	Prevotella_oryzae	0	0	0	0	0	0	0	0	0	0	31	0	83	10	0	0	0	0	0	10	0	10	21	0	0	0	0	0	0	0	0	0	0	0	0	0	0	146	41	0	0	0	42	0	0	0	0	21
	Anaerotignum_faecicola	0	0	0	0	0	0	0	0	0	0	5648	0	0	18077	7803	0	35061	0	3041	4890	19774	0	14498	0	0	0	0	0	0	0	0	0	0	0	0	0	0	17929	20689	0	0	26088	0	0	0	0	916	0
	Galliscardovia_simiarum	0	117	0	29	0	15	75	0	60	271	0	0	0	0	152	197	0	106	0	0	0	0	0	0	0	0	60	75	30	0	0	0	0	0	0	0	149	0	0	0	244	0	0	0	0	0	0	0
	Mesosutterella_.spp	0	0	0	88	0	0	0	1517	6530	3884	0	3631	0	0	0	19390	0	0	0	0	0	0	0	7082	0	0	0	0	0	0	8514	8154	5460	0	0	0	0	0	325	0	1166	0	0	161	36702	0	0	0
	Streptococcus_massiliensis	1009	165	2868	0	260	0	936	0	0	0	0	125	0	0	0	28	0	0	0	0	0	0	0	0	0	0	1350	94	0	290	0	285	0	0	0	0	0	0	0	0	75	0	0	578	0	0	0	0
	Collinsella_bouchesdurhonensis	0	14521	0	0	0	0	0	0	0	0	1312	0	10330	0	0	0	845	1317	0	1774	0	0	5502	0	0	0	0	0	0	27834	0	0	0	0	0	0	0	11109	0	0	4453	0	1527	0	0	0	0	0
	Holdemanella_.spp	0	0	0	0	0	0	0	0	0	0	7824	0	0	7273	0	0	0	29	0	6811	2701	7670	19472	0	0	0	0	0	0	0	0	0	0	0	0	0	0	6222	0	0	2582	0	1727	21859	4368	0	0	1856
	Bifidobacterium_breve	2953271	179898	125635	251845	431728	363748	164771	83525	377790	778365	0	24664	129224	0	296058	450505	46325	144575	0	1158	49590	0	4189	366410	0	5955067	269868	365919	275997	640770	94628	88362	61703	3885	282510	38574	226235	4298	13691	21385	529786	11008	36651	245487	218876	161567	23356	0
	Streptococcus_mutans	208	155	1036	0	0	0	300	0	0	112	0	0	0	338	0	0	0	0	0	0	0	0	112	0	204	0	481	0	0	0	0	568	0	0	0	0	0	0	0	0	72	0	0	822	0	0	0	0
	Galliscardovia_tissieri	0	19	0	38	39	0	0	0	38	77	0	0	0	0	38	39	0	19	0	0	59	0	0	0	0	0	0	0	0	0	0	0	0	0	0	0	19	0	0	0	214	0	0	0	0	0	0	0
	Streptococcus_ovis	453	63	2732	0	148	0	278	0	0	0	0	74	0	0	0	63	0	0	0	0	0	0	0	0	0	0	788	0	0	0	0	192	0	0	0	0	0	0	0	0	63	0	0	320	0	0	0	0
	Olsenella_F_profusa_A	0	92	0	0	0	0	0	0	106	26	0	0	186	0	79	226	0	106	0	0	119	0	104	0	0	0	0	0	0	0	0	0	0	0	0	0	0	0	0	0	0	0	0	0	0	0	0	0
	Streptococcus_parasanguinis_B	5578	5513	20037	0	1292	0	6136	0	752	0	0	2903	397	1561	0	3621	0	0	0	0	0	4330	497	0	0	94	7206	901	0	274	0	1388	376	0	0	0	0	0	0	0	1314	0	0	8353	574	0	0	0
	Streptococcus_mitis	49033	1079	994	0	9390	281	1888	1122	0	0	0	1069	0	0	0	0	0	0	0	0	0	0	0	0	0	0	26276	772	1212	718	0	3539	1730	1314	0	716	0	0	0	0	5587	0	0	0	0	0	0	0
	Prevotella_pectinovora	0	76	0	0	0	0	0	0	0	0	770	0	1057	781	0	0	0	4330	0	0	1970	153	0	0	0	0	0	0	0	0	0	0	0	0	0	0	0	0	0	0	0	0	4717	0	0	0	0	3780
	Streptococcus_caballi	450	167	1531	0	51	135	999	0	115	0	0	94	0	0	0	186	0	0	0	0	0	0	0	0	959	0	903	0	0	0	0	1167	0	0	0	0	0	0	0	0	62	0	0	667	51	0	0	0
	Streptococcus_gordonii	1344	328	3971	0	184	0	968	0	138	0	0	115	0	0	0	0	0	0	0	0	0	0	0	0	0	0	1913	0	0	0	0	416	0	0	0	0	0	0	0	0	47	0	0	4288	0	0	0	0
	Acidaminococcus_fermentans_A	0	0	0	115	0	0	0	0	0	4476	0	0	614	0	9433	36819	449	0	0	0	0	0	0	0	0	0	0	0	0	0	0	953	7942	0	0	258	0	0	0	11900	2736	0	0	0	17562	0	0	0
	Holdemanella_porci	0	0	0	0	0	0	0	0	0	0	2797	0	0	52112	0	0	0	4078	0	36178	19137	11869	11250	0	0	0	0	0	0	0	0	0	0	0	0	0	0	48645	0	0	29699	0	8686	15979	1636	0	0	3058
	Streptococcus_downei	226	0	501	0	0	22	164	0	0	0	0	0	0	0	0	0	0	0	0	0	335	0	0	0	0	0	413	0	0	0	0	178	0	0	0	0	0	0	0	0	901	0	0	16756	618	0	0	0
	Prevotella_baroniae	0	0	0	0	0	0	0	0	0	0	188	0	197	56	0	0	0	1035	0	0	432	136	0	0	0	0	0	0	0	0	0	0	0	0	0	0	0	19	0	0	0	0	1161	0	0	0	0	1998
	Prevotella_brevis	0	0	0	0	0	0	0	0	0	0	167	0	89	22	0	0	0	133	0	0	110	11	0	0	0	0	0	0	0	0	0	0	0	0	0	0	0	100	0	0	0	0	267	0	0	0	0	242
	Streptococcus_oricebi	811	28	2619	0	141	0	524	0	0	0	0	83	0	0	0	0	0	0	0	0	0	0	0	0	0	0	779	0	0	0	0	140	0	0	0	0	0	0	0	0	27	0	0	508	0	0	0	0
	Streptococcus_loxodontisalivarius	324	132	1163	0	20	176	583	0	154	0	0	137	0	0	0	82	0	0	0	0	0	0	0	0	271	0	597	0	0	0	0	917	0	0	0	0	0	0	0	0	62	0	0	738	0	0	0	0
	Pauljensenia_meyeri	4845	0	0	0	2828	0	261	0	95	0	0	299	0	0	0	359	0	0	0	0	0	0	0	0	0	0	7377	126	113	0	0	0	414	0	0	0	0	0	0	0	0	0	0	174	0	0	0	0
	Agathobaculum_butyriciproducens	0	1722	0	0	0	0	0	0	0	0	4445	0	31855	6613	1933	0	1697	10830	2956	3468	457	1173	29390	0	0	0	0	0	0	0	0	0	0	0	0	1017	44511	7257	1107	0	1132	23748	1241	0	0	31038	4415	0
	Streptococcus_henryi	576	161	1217	0	92	154	643	0	126	0	0	93	0	0	0	103	0	0	0	0	0	0	0	0	875	0	838	0	0	0	0	930	0	0	0	0	0	0	0	0	47	0	0	785	0	0	0	0
	Streptococcus_himalayensis	969	74	3427	0	181	0	478	0	0	0	0	107	0	0	0	0	0	0	0	0	0	0	0	0	0	0	1145	0	0	0	0	74	0	0	0	0	0	0	0	0	115	0	0	613	0	0	0	0
	Streptococcus_hyovaginalis	269	47	1526	0	0	84	483	0	96	0	0	0	0	0	0	0	0	0	0	0	0	0	0	0	48	0	375	0	0	0	0	675	0	0	0	0	0	0	0	0	24	0	0	483	0	0	0	0
	UBA3839_.spp	0	0	0	0	0	0	0	0	0	0	40	0	0	40	0	0	0	111	0	0	0	0	0	0	0	0	0	0	0	0	0	0	0	0	0	0	0	26	40	0	0	0	40	0	0	0	0	56
	Lancefieldella_.spp	3273	109	80726	0	822	0	706	0	0	0	0	110	0	0	0	0	0	0	0	0	0	0	0	0	729	6174	18903	253	1831	0	0	733	102	0	0	0	0	0	0	0	0	0	0	3827	918	0	0	0
	Acidaminococcus_provencensis	0	0	0	0	0	0	0	0	0	1422	0	0	138	0	3486	13100	448	0	0	0	0	0	0	0	0	0	0	0	0	0	455	0	2994	0	0	0	0	0	0	8950	883	0	0	0	4755	0	0	0
	Fimenecus_stercoravium	0	0	0	0	0	0	0	0	0	0	0	0	28	83	0	0	0	14	0	0	0	306	42	0	0	0	0	0	0	0	0	0	0	0	0	0	0	0	0	0	0	182	0	0	0	0	0	0
	Collinsella_stercoripullorum	0	169	0	0	0	0	0	0	115	0	0	0	198	0	58	1030	0	791	0	0	86	0	0	0	0	0	0	0	0	28	0	0	0	0	0	0	0	0	0	0	0	0	0	0	0	0	0	0
	Bifidobacterium_stellenboschense	0	0	0	46	0	0	0	0	46	371	0	0	0	0	91	230	0	22	0	0	0	0	0	23	0	0	0	0	0	0	0	0	0	0	0	0	0	0	0	0	46	0	0	0	0	0	0	0
	Bifidobacterium_adolescentis	5680	10531	2137	1949	6948	2063	3553	783	4148	7883	10014	782	5473	0	9159	5592	1482	10741	181	1287	13091	28641	1871	2615	422	1785	7127	5194	5326	15058	1977	1351	1569	0	4540	661	3251	6108	2736	196	40279	0	91162	2108	1414	8730	70652	2379
	Copromorpha_.spp	0	0	0	0	0	0	0	0	0	0	0	0	2337	2169	8142	4946	0	8352	0	139	28	7541	0	0	0	0	0	0	0	0	0	0	0	0	0	0	1177	2012	308	0	0	0	191	0	0	523	322	0
	Cryptobacteroides_.spp	0	3162	0	0	0	0	0	0	0	0	192544	0	0	1467518	4843772	0	0	626231	0	0	864588	124533	43685	0	0	0	0	0	0	0	0	0	0	0	0	0	0	0	0	0	9065	0	141252	0	0	0	0	47689
	Nanogingivalis_.spp	11914	614	0	0	17863	0	7992	0	0	0	0	0	0	0	0	124	0	0	0	0	0	0	0	0	0	0	79399	0	0	0	0	2310	2058	0	0	47	1014	0	0	0	0	0	0	0	0	0	0	0
	Collinsella_ihuae	0	88	0	0	0	0	0	0	0	0	0	0	70	0	0	350	0	592	0	0	135	0	53	0	0	0	0	0	0	124	0	0	0	0	0	0	18	0	0	0	0	0	0	0	0	0	0	0
	Prevotella_stercorea	0	92957	0	0	0	0	0	0	0	0	25192	0	16234	756607	0	0	0	80101	0	0	1512	85	0	0	0	0	0	0	0	0	0	0	0	0	0	0	0	0	0	0	0	0	34735	0	0	0	0	40947
	Anaeroglobus_geminatus	0	88	0	0	0	11507	0	0	0	500	0	0	198	0	0	388	0	0	0	0	0	0	0	0	0	0	0	365	0	724	44	0	0	0	0	3774	65	0	0	442	506	0	0	175	6098	0	0	0
	Streptococcus_pluranimalium	444	109	1231	0	37	37	403	0	0	0	0	0	0	0	0	61	0	0	0	0	0	0	0	0	100	0	422	0	0	0	0	677	0	0	0	0	0	0	0	0	0	0	0	393	0	0	0	0
	Rothia_mucilaginosa	23808	769	62343	0	3057	0	1328	0	0	0	0	239	0	0	0	0	0	0	0	0	0	0	0	0	2001	3971	12869	382	0	0	0	726	321	0	0	0	0	0	0	0	518	0	0	2845	0	0	0	0
	Limosilactobacillus_mucosae	0	0	0	12799	0	0	0	0	128233	283921	0	0	0	0	0	0	0	0	0	0	0	0	0	311	0	0	0	0	0	4631	0	0	4897	0	0	0	0	0	238	0	0	0	84	6704	16246	0	0	0
	Gemmiger_A_avium	0	16	0	0	0	0	0	0	0	0	161	0	64	192	0	48	0	48	32	0	0	497	258	0	0	0	0	0	0	0	0	0	0	0	0	0	192	487	112	0	0	258	0	0	97	144	80	0
	Prevotella_timonensis	0	434	6375	0	691	0	0	0	736	472	0	0	0	0	0	1436	0	0	0	0	0	0	0	0	0	0	5677	0	0	1866	3440	0	1647	0	0	0	0	0	0	0	0	0	0	0	0	0	0	0
	Prevotella_oris	0	0	0	0	0	0	0	0	0	0	0	0	147	221	0	0	0	0	0	0	0	0	0	0	0	0	0	0	0	0	1373	0	0	0	0	0	0	264	74	0	0	0	457	0	0	0	0	337
	Galliscardovia_catulorum	0	12	0	0	25	0	0	0	25	76	0	0	0	0	64	89	0	25	0	0	0	0	0	0	0	0	25	0	0	0	0	0	0	0	0	0	0	0	0	0	153	0	0	0	0	0	0	0
	Bifidobacterium_ruminantium	742	14588	80	1308	2932	2342	2938	59	3164	4764	140	637	7845	0	10855	3710	1620	14373	40	593	15331	1445	398	1443	100	721	4263	2302	2256	1896	628	760	575	0	258	1199	1925	5920	3042	287	40994	0	4763	877	826	1148	4004	0
	Acidaminococcus_.spp	0	0	0	0	0	0	0	0	0	1870	0	0	132	0	8401	20835	4300	0	0	0	0	0	0	0	0	0	0	0	0	0	13638	0	21992	0	0	0	0	0	0	81223	977	0	0	0	7843	0	0	0
	Streptococcus_porci	186	106	546	0	0	42	215	0	0	0	0	10	0	0	0	21	0	0	0	0	0	0	0	0	52	0	405	0	0	0	0	307	0	0	0	0	0	0	0	0	0	0	0	234	0	0	0	0
	Streptococcus_pharyngis	192	22	856	0	30	0	288	0	0	0	0	0	0	0	0	0	0	0	0	0	0	0	0	0	0	0	221	0	0	0	0	98	0	0	0	0	0	0	0	0	0	0	0	171	0	0	0	0
	Streptococcus_ferus	224	0	861	0	0	0	241	0	0	0	0	8	0	0	0	16	0	0	0	0	0	0	0	0	49	0	225	0	0	0	0	99	0	0	0	0	0	0	0	0	0	0	0	371	0	0	0	0
	Limicola_phocaeensis_A	0	56	0	0	0	0	0	0	55	0	0	0	0	0	0	246	0	166	0	0	66	0	0	0	0	0	0	0	0	33	0	0	0	0	0	0	0	0	0	0	0	0	0	0	0	0	0	0
	Floccifex_porci	0	0	0	0	0	0	0	0	0	0	244	0	0	204	0	0	0	0	0	104	0	259	52	0	0	0	0	0	0	0	0	0	0	0	0	0	0	115	0	0	0	0	0	317	44	0	0	0
	Megasphaera_A_paucivorans	0	189	0	41	0	0	0	0	0	122	0	0	121	0	0	0	0	0	0	0	0	0	0	0	0	0	0	0	0	390	53	0	0	0	0	0	0	0	0	312	80	0	0	0	163	0	0	0
	Slackia_A_isoflavoniconvertens	0	0	0	0	0	0	0	0	0	0	0	2072	350	0	1377	0	0	0	0	0	0	0	5655	0	0	0	0	0	0	0	0	0	0	0	0	0	0	0	5314	0	2057	0	4171	0	0	0	0	0
	Catenibacterium_mitsuokai	0	0	0	0	0	0	0	0	0	0	534	0	0	4866	0	0	0	16739	0	3779	1190	0	8505	0	0	0	0	0	0	0	0	0	0	0	0	0	0	0	0	0	26991	0	8092	0	0	0	0	0
	CAIFEU01_.spp	0	55	0	0	0	0	0	0	167	0	0	0	0	0	55	27	0	136	0	0	0	0	0	0	0	0	0	0	0	0	0	0	0	0	0	0	0	0	0	0	82	0	0	0	0	0	0	0
	Alloprevotella_.spp	0	0	0	0	0	0	0	0	0	0	114	0	193	217779	0	0	0	54626	0	114	0	208	0	0	0	0	0	0	0	0	0	0	0	0	0	0	0	144	16	49	0	0	206427	0	0	0	16	264965
	Alangreenwoodia_.spp	0	0	0	0	0	0	0	0	0	0	6258	0	0	0	1404	0	0	7776	2267	0	0	10668	0	0	0	0	0	0	0	0	0	0	0	0	0	0	0	7326	0	0	0	0	0	0	0	545	0	0
	UBA1417_.spp	0	0	0	0	0	0	0	0	0	0	2999	0	0	49239	20951	0	0	0	31787	1570	412	87851	535	0	0	0	0	0	0	0	0	0	0	0	0	0	0	12398	6845	0	0	89449	0	0	0	37791	15286	506
	Anaerofilum_faecale	0	0	0	0	0	0	0	0	0	0	63	0	0	141	0	0	0	0	15	0	0	470	109	0	0	0	0	0	0	0	0	0	0	0	0	0	141	223	47	0	0	47	0	0	15	109	0	0
	Mitsuokella_jalaludinii	0	0	0	0	0	0	0	0	0	0	0	0	0	0	1308	0	23612	2891	0	0	7117	0	0	0	0	0	0	0	0	0	0	0	0	0	0	0	0	0	170	391	45481	0	2386	0	0	0	0	37276
	Streptococcus_mitis_BB	9052	345	92690	0	2448	0	420	0	0	0	0	0	0	0	0	519	0	0	0	0	0	0	0	0	0	245	4892	0	0	759	0	579	135	0	0	0	0	0	0	0	602	0	0	0	0	0	0	0
	UBA4334_.spp	0	0	0	0	0	0	0	0	0	0	0	0	0	85	0	0	0	84	0	0	0	0	0	0	0	0	0	0	0	0	0	0	0	0	0	0	0	65	0	0	0	0	42	0	0	0	0	43
	Streptococcus_alactolyticus	535	80	674	0	0	0	676	0	125	0	0	124	0	0	0	100	0	0	0	0	0	0	0	0	8004	0	850	0	0	0	0	645	0	0	0	0	0	0	0	0	40	0	0	354	0	0	0	0
	Olsenella_G_urininfantis	0	64	0	0	0	0	0	0	112	16	0	0	79	0	0	177	0	16	0	0	0	0	0	0	0	0	0	0	0	0	0	0	0	0	0	0	0	0	0	0	16	0	0	0	0	0	0	0
	Pseudoscilispira_falkowii	0	0	0	0	0	0	0	0	0	0	215	0	0	315	0	0	0	0	334	0	106	666	21	0	0	0	0	0	0	0	0	0	0	0	0	0	0	247	0	0	0	330	0	0	0	326	85	0
	Evtepia_.spp	0	0	0	0	0	0	0	0	0	0	545	0	0	0	8849	0	1821	0	0	0	0	16735	2082	0	0	0	0	0	0	0	0	0	0	0	0	0	0	5205	0	0	0	0	0	0	0	0	0	0
	Merdisoma_.spp	0	0	0	0	0	0	0	0	0	0	7839	0	0	1874	0	0	0	0	0	0	0	3837	12399	0	0	0	0	0	0	0	0	0	0	0	0	0	0	67	2112	0	0	0	0	0	0	0	0	0
	Gemmiger_variabilis_B	0	0	0	0	0	0	0	0	0	0	381	0	1339	1434	153	0	0	229	1028	623	194	667	452	0	0	0	0	0	0	0	0	0	0	0	0	0	0	12909	13306	0	0	14196	0	0	0	1139	1553	0
	Sutterella_seckii_A	0	9743	0	0	0	0	0	0	0	0	0	0	3776	0	0	0	0	7561	0	630	0	0	1629	0	0	0	0	0	0	0	0	0	0	0	0	0	0	0	0	0	0	0	0	0	0	0	0	628
	Ligilactobacillus_ruminis	0	91914	0	36428	0	0	0	0	0	0	0	0	209838	0	0	0	3559	578	0	0	1649	0	0	17271	0	0	0	0	0	0	0	0	0	0	0	0	0	0	0	0	0	0	0	0	0	0	0	3033
	Mitsuokella_.spp	0	0	0	109	0	0	0	0	0	0	0	0	0	0	0	0	3481	0	0	81	445	0	0	0	0	0	0	0	0	0	0	0	0	0	0	0	0	0	130634	141306	10753	0	0	0	0	0	0	6924
	Fimenecus_.spp	0	0	0	0	0	0	0	0	0	0	110	0	249979	26537	0	0	0	533354	32230	97155	20564	313342	475272	0	0	0	0	0	0	0	0	0	0	0	0	0	0	60671	0	0	9247	679182	0	0	0	0	0	85408
	Enorma_.spp	0	0	0	0	0	0	0	0	0	0	0	0	55	0	0	2218	0	1335	0	0	405	0	272	0	0	0	0	0	0	0	0	0	0	0	0	0	0	0	0	0	0	0	0	0	0	0	0	0
	CAG-238_.spp	0	0	0	0	0	0	0	0	0	0	44223	0	0	15004	21962	0	0	0	4934	0	1213	8758	0	0	0	0	0	0	0	0	0	0	0	0	0	0	0	0	0	0	0	3383	0	0	0	0	0	0
	Odoribacter_.spp	0	7558	0	0	0	0	0	0	0	0	48365	0	118505	116139	438145	0	0	72466	2784	0	1691	559931	14446	0	0	0	0	0	0	0	0	0	0	0	0	0	0	0	0	1965699	0	0	6395	0	0	26356	53480	1493
	Acidaminococcus_timonensis	0	0	0	0	0	0	0	0	0	447	0	0	0	0	3200	6711	0	0	0	0	0	0	0	0	0	0	0	0	0	0	0	0	1553	0	0	0	0	0	0	11219	315	0	0	0	2864	0	0	0
	Anaeroglobus_massiliensis	0	87	0	0	0	3180	0	0	0	378	0	0	0	0	0	113	0	0	0	0	0	0	0	0	0	0	0	6349	0	464	0	0	0	0	0	0	22	0	0	201	244	0	0	109	1138	0	0	0
	Streptococcus_pneumoniae	5515	0	670	0	2631	0	171	0	0	0	0	0	0	0	0	0	0	0	0	0	0	0	0	0	0	242	5780	0	0	323	0	662	0	0	0	0	0	0	0	0	635	0	0	0	0	0	0	0
	Gemmiger_stercorigallinarum	0	0	0	0	0	0	0	0	0	0	0	0	407	180	80	0	0	344	266	162	40	359	241	0	0	0	0	0	0	0	0	0	0	0	0	0	0	1657	603	0	0	813	0	0	0	389	386	0
	Kandleria_vitulina	0	0	0	0	0	0	0	0	0	0	221	0	0	793	0	0	0	181	0	0	0	0	0	0	0	0	0	0	0	0	0	0	0	0	0	0	0	109	0	0	0	0	182	0	0	0	0	0
	Gemmiger_formicilis	0	0	0	0	0	0	0	0	0	0	1727	0	63363	7691	30481	0	0	49532	64019	2729	29428	3321	33399	0	0	0	0	0	0	0	0	0	0	0	0	0	0	75767	453	0	1724	3641	13912	0	0	63424	70631	0
	Streptococcus_timonensis	3393	0	2158	0	665	0	407	0	0	0	0	0	0	0	0	0	0	0	0	0	0	0	0	0	0	0	4246	0	0	0	0	62	0	0	0	0	0	0	0	0	290	0	0	0	0	0	0	0
	Streptococcus_danieliae	283	0	1222	0	0	0	185	0	0	0	0	10	0	0	0	0	0	0	0	0	0	0	0	0	0	0	239	0	0	0	0	0	0	0	0	0	0	0	0	0	0	0	0	132	0	0	0	0
	Acidaminococcus_fermentans	0	0	0	0	0	0	0	0	0	1449	0	0	0	0	2118	9202	0	0	0	0	0	0	0	0	0	0	0	0	0	0	0	0	3793	0	0	0	0	0	0	4994	861	0	0	0	4981	0	0	0
	Streptococcus_iniae	19	0	256	0	0	0	29	0	0	0	0	0	0	0	0	0	0	0	0	0	0	0	0	0	30	0	167	0	0	0	0	59	0	0	0	0	0	0	0	0	0	0	0	49	0	0	0	0
	Streptococcus_suis_V	187	0	384	0	0	0	43	0	0	0	0	0	0	0	0	0	0	0	0	0	0	0	0	0	0	0	557	0	0	0	0	43	0	0	0	0	0	0	0	0	0	0	0	162	0	0	0	0
	Limisoma_.spp	0	28141	0	0	0	0	0	0	0	0	380426	0	143275	0	0	0	0	378010	0	0	15999	0	0	0	0	0	0	0	0	0	0	0	0	0	0	0	0	0	0	0	0	0	43383	0	0	0	0	17105
	Faecousia_.spp	0	0	0	0	0	0	0	0	0	0	5583	0	0	10590	0	0	0	0	1217	0	0	16426	4775	0	0	0	0	0	0	0	0	0	0	0	0	0	0	0	0	0	0	4884	0	0	0	0	1923	0
	Pauljensenia_odontolytica	5744	0	0	0	2774	0	250	0	0	0	0	254	0	0	0	61	0	0	0	0	0	0	0	0	0	0	8815	0	0	0	0	0	357	0	0	0	0	0	0	0	0	0	0	0	0	0	0	0
	Anaerotignum_lactatifermentans_A	0	0	0	0	0	0	0	0	0	0	0	0	0	23	0	0	59	0	0	0	0	0	0	0	0	0	0	0	0	0	0	0	0	0	0	0	0	0	35	0	0	258	0	0	0	0	0	0
	Alloprevotella_timonensis	0	0	0	0	0	0	0	0	0	0	0	0	0	59	0	0	0	867	0	0	9304	0	0	0	0	0	0	0	0	0	0	0	0	0	0	0	0	0	0	0	0	0	490	0	0	0	0	788
	Ventrenecus_.spp	0	0	0	0	0	0	0	0	0	0	2377	0	0	45	0	0	0	0	17124	0	0	22006	0	0	0	0	0	0	0	0	0	0	0	0	0	0	0	843	0	0	0	35223	0	0	0	0	0	0
	Alistipes_provencensis	0	0	0	0	0	0	0	0	0	0	0	0	0	48	0	0	0	0	0	0	0	4911	0	0	0	0	0	0	0	0	0	0	0	0	0	0	0	674	0	0	0	0	0	0	0	0	390	0
	Megasphaera_massiliensis	0	0	0	0	0	0	0	0	0	312	0	0	0	0	0	0	0	0	0	0	0	0	0	0	0	0	0	0	0	1589	0	0	0	0	0	0	127228	0	0	636	5604	0	0	309	310	0	0	0
	Streptococcus_minor	290	0	777	0	0	0	259	0	0	0	0	17	0	0	0	0	0	0	0	0	0	0	0	0	0	0	430	0	0	0	0	87	0	0	0	0	0	0	0	0	0	0	0	334	0	0	0	0
	Phascolarctobacterium_A_succinatutens	0	0	0	0	0	0	0	0	0	0	159759	0	0	104644	0	0	0	0	67598	0	2859	0	3710	9941	0	0	0	0	0	0	0	0	0	1818	0	0	3831	0	0	0	71	0	0	0	0	0	0	0
	Slackia_A_equolifaciens	0	0	0	0	0	0	0	0	160	61	0	0	0	0	0	48	0	0	0	0	0	0	0	0	0	0	0	0	0	12	0	0	0	0	0	0	0	0	0	0	111	0	0	0	0	0	0	0
	Lancefieldella_parvula	904	0	23136	0	0	0	0	0	0	0	0	0	0	0	0	0	0	0	0	0	0	0	0	0	0	994	4154	0	35	0	0	0	0	0	0	0	0	0	0	0	0	0	0	779	270	0	0	0
	Streptococcus_cristatus	615	0	842	0	47	0	191	0	0	0	0	0	0	0	0	0	0	0	0	0	0	0	0	0	0	0	715	0	0	0	0	72	0	0	0	0	0	0	0	0	0	0	0	116	0	0	0	0
	Gemmiger_.spp	0	0	0	0	0	0	0	0	0	0	5343	0	34943	11630	5677	0	0	13727	15455	32741	6423	10987	9571	0	0	0	0	0	0	0	0	0	0	0	0	0	0	86894	86808	0	0	121766	1614	0	0	17950	18783	0
	Enterococcus_A_raffinosus	0	0	0	0	26219	0	0	0	45426	13282	0	0	0	0	0	1472	0	0	0	0	0	0	0	37632	0	0	0	1665	198663	5872	9792	14759	1663	929	0	0	25673	0	0	0	0	0	0	0	0	0	0	0
	Streptococcus_plurextorum	151	0	806	0	0	0	71	0	0	0	0	0	0	0	0	0	0	0	0	0	0	0	0	0	0	0	374	0	0	0	0	154	0	0	0	0	0	0	0	0	0	0	0	182	0	0	0	0
	Streptococcus_equi	87	0	255	0	0	0	22	0	0	0	0	0	0	0	0	0	0	0	0	0	0	0	0	0	55	0	243	0	0	0	0	218	0	0	0	0	0	0	0	0	0	0	0	202	0	0	0	0
	Streptococcus_varani	255	0	847	0	10	0	87	0	0	0	0	0	0	0	0	0	0	0	0	0	0	0	0	0	0	0	272	0	0	0	0	54	0	0	0	0	0	0	0	0	0	0	0	255	0	0	0	0
	Streptococcus_infantis_C	3535	0	2710	0	1322	0	0	0	0	0	0	0	0	0	0	0	0	0	0	0	0	0	0	0	0	0	3958	0	0	135	0	155	0	0	0	0	0	0	0	0	107	0	0	0	0	0	0	0
	Streptococcus_entericus	131	0	297	0	0	0	28	0	0	0	0	0	0	0	0	0	0	0	0	0	0	0	0	0	0	0	141	0	0	0	0	210	0	0	0	0	0	0	0	0	0	0	0	131	0	0	0	0
	Bifidobacterium_subtile	0	0	0	0	0	0	0	0	0	257	0	0	0	0	64	65	0	0	0	0	0	0	0	0	0	16	48	0	0	0	0	0	0	0	0	0	0	0	0	0	97	0	0	0	0	0	0	0
	Streptococcus_halichoeri	84	0	373	0	0	0	131	0	0	0	0	0	0	0	0	0	0	0	0	0	0	0	0	0	0	0	121	0	0	0	0	28	0	0	0	0	0	0	0	0	0	0	0	132	0	0	0	0
	CAG-83_.spp	0	0	0	0	0	0	0	0	0	0	174179	0	0	259967	81146	0	2692	0	481360	0	139270	384779	21911	0	0	0	0	0	0	0	0	0	0	0	0	0	0	352155	89873	0	0	625437	0	0	0	13318	0	0
	Streptococcus_phocae	30	0	499	0	0	0	124	0	0	0	0	0	0	0	0	0	0	0	0	0	0	0	0	0	93	0	345	0	0	0	0	248	0	0	0	0	0	0	0	0	0	0	0	269	0	0	0	0
	Gemmiger_variabilis	0	0	0	0	0	0	0	0	0	0	0	0	509	172	0	0	0	228	364	123	17	155	141	0	0	0	0	0	0	0	0	0	0	0	0	0	0	1398	962	0	0	1709	0	0	0	270	194	0
	Limosilactobacillus_fermentum	0	0	0	0	0	1013	0	0	0	0	0	3782	0	0	0	0	0	0	0	0	0	0	0	1763	0	0	0	0	0	0	0	1332	0	0	0	0	0	0	0	0	0	0	0	7983	30784	0	0	0
	Alloscardovia_criceti	0	30	0	0	0	0	0	0	0	22	0	0	0	0	76	0	0	53	0	0	0	0	0	0	0	0	0	0	0	0	0	0	0	0	0	0	0	0	0	0	114	0	0	0	0	0	0	0
	Desulfovibrio_.spp	0	0	0	0	0	0	0	0	0	2365	0	0	0	14143	1996	15293	0	0	0	0	14387	0	0	0	0	0	0	0	0	0	0	0	0	0	0	0	0	0	0	25948	0	16798	0	0	0	0	0	0
	Streptococcus_suis_N	296	0	443	0	0	0	88	0	0	0	0	0	0	0	0	0	0	0	0	0	0	0	0	0	0	0	779	0	0	0	0	313	0	0	0	0	0	0	0	0	0	0	0	106	0	0	0	0
	Streptococcus_anginosus	1652	0	268	0	0	0	1784	0	0	0	0	0	0	0	0	0	0	0	0	0	0	0	0	0	0	0	214	0	0	0	0	0	0	0	0	0	0	0	0	0	0	0	0	429	0	0	0	0
	Gemmiger_excrementipullorum	0	0	0	0	0	0	0	0	0	0	0	0	1528	67	265	0	0	1302	1557	492	98	160	749	0	0	0	0	0	0	0	0	0	0	0	0	0	0	4750	1027	0	0	2578	0	0	0	1753	1804	0
	Streptococcus_ruminantium	168	0	257	0	0	0	64	0	0	0	0	0	0	0	0	0	0	0	0	0	0	0	0	0	0	0	238	0	0	0	0	52	0	0	0	0	0	0	0	0	0	0	0	75	0	0	0	0
	Bariatricus_comes	0	0	0	0	0	0	0	0	0	0	100122	0	303	13038	0	0	0	0	2806	2929	0	1535	2526	0	0	0	0	0	0	1477	0	0	0	0	0	0	0	20468	22082	0	0	8209	0	0	12425	0	0	0
	Lactobacillus_paragasseri	0	0	118031	0	0	56978	224080	0	0	0	0	254546	0	0	0	0	0	0	0	0	0	0	0	0	0	2927	7607	3388	0	0	0	1258817	0	0	1849	0	0	0	0	0	0	0	0	0	8859	0	0	0
	Sutterella_faecalis	0	4386	0	0	0	0	0	0	0	0	0	0	2428	0	0	0	0	6049	0	1458	0	0	846	0	0	0	0	0	0	0	0	0	0	0	0	0	0	0	0	0	0	0	0	0	0	0	0	2587
	Streptococcus_rubneri	690	44	2263	0	43	0	175	0	0	0	0	0	0	0	0	0	0	0	0	0	0	0	0	0	0	0	370	0	0	0	0	0	0	0	0	0	0	0	0	0	0	0	0	428	0	0	0	0
	Alangreenwoodia_gallinarii	0	0	0	0	0	0	0	0	0	0	12	0	0	0	0	0	0	76	0	0	0	214	0	0	0	0	0	0	0	0	0	0	0	0	0	0	0	163	0	0	0	0	0	0	0	0	0	0
	Faecalibacterium_prausnitzii_G	0	976173	0	57976	0	0	0	0	0	0	47763	0	486260	16345	26526	1844578	0	253102	186358	154527	215873	91954	1244470	171527	0	0	0	0	0	0	0	0	0	79696	0	261496	150688	205612	242141	0	71547	365662	83997	507285	3885312	1053352	127705	13248
	Streptococcus_suis	569	0	1532	0	0	0	413	0	0	0	0	0	0	0	0	0	0	0	0	0	0	0	0	0	0	0	708	0	0	0	0	72	0	0	0	0	0	0	0	0	0	0	0	167	0	0	0	0
	Lactobacillus_taiwanensis	0	0	20166	0	0	11194	41219	0	0	0	0	48600	0	0	0	0	0	0	0	0	0	0	0	0	0	23099	851	391	0	0	0	231763	0	0	2110	0	0	0	0	0	0	0	0	0	28402	0	0	0
	Heteroscilispira_lomanii	0	0	0	0	0	0	0	0	0	0	9	0	0	214	0	0	0	0	0	0	0	106	0	0	0	0	0	0	0	0	0	0	0	0	0	0	0	0	0	0	0	107	0	0	0	0	0	0
	Ligilactobacillus_salivarius	0	2728	0	0	0	0	0	0	0	0	0	0	0	0	0	0	0	0	0	0	0	0	0	0	0	0	0	0	0	0	0	23	0	0	0	0	0	0	420	0	0	0	0	0	13139	0	0	1230
	Lachnoclostridium_B	0	0	0	0	0	0	0	0	0	0	126	0	443	609	909	639	0	874	594	0	464	2618	951	0	0	0	0	0	0	0	0	0	0	0	0	0	0	2172	0	0	0	0	1272	0	0	775	0	0
	Christensenella_hongkongensis	0	0	0	0	0	0	0	0	0	114	0	0	0	0	630	0	0	114	0	0	0	1276	0	0	0	0	0	0	0	0	0	0	0	0	0	0	0	2312	0	0	0	0	0	0	3521	0	0	0
	Streptococcus_didelphis	0	0	154	0	0	0	85	0	0	0	0	0	0	0	0	0	0	0	0	0	0	0	0	0	0	0	34	0	0	0	0	0	0	0	0	0	0	0	0	0	0	0	0	8	0	0	0	0
	Dysosmobacter_.spp	0	0	0	0	0	0	0	0	0	0	100256	0	0	37550	0	0	240	0	9318	14583	19477	105065	9772	0	0	0	0	0	0	0	0	0	0	0	0	0	0	39361	0	0	0	28989	0	0	0	5294	5586	2864
	UMGS1766_.spp	0	0	0	0	0	0	0	0	0	0	0	0	0	2462	0	0	0	0	0	0	0	0	0	0	0	0	0	0	0	0	0	0	0	0	0	0	0	138	0	0	0	56	0	0	0	0	0	0
	Streptococcus_constellatus	0	0	136	0	0	0	182	0	0	0	0	0	0	0	0	172	0	0	0	0	0	0	0	0	0	0	180	0	0	0	0	0	0	0	0	0	0	0	0	0	0	0	0	125	0	0	0	0
	Streptococcus_merionis	195	0	388	0	0	0	119	0	0	0	0	0	0	0	0	0	0	0	0	0	0	0	0	0	0	0	157	0	0	0	0	24	0	0	0	0	0	0	0	0	0	0	0	218	0	0	0	0
	CAG-103_.spp	0	0	0	0	0	0	0	0	0	0	85942	0	0	32986	38056	0	0	0	472	0	0	1494	0	0	0	0	0	0	0	0	0	0	0	0	0	0	0	0	0	0	0	104927	0	0	0	0	568	0
	Lactobacillus_psittaci	0	0	25	0	0	8	203	0	0	0	0	217	0	0	0	0	0	0	0	0	0	0	0	0	0	42	0	0	0	0	0	1346	0	0	0	0	0	0	0	0	0	0	0	0	277	0	0	0
	Olsenella_uli	0	0	0	0	0	0	0	0	91	36	0	0	36	0	55	146	0	0	0	0	0	0	0	0	0	0	0	0	0	0	0	0	0	0	0	0	0	0	0	0	0	0	0	0	0	0	0	0
	NSJ-62_.spp	0	0	0	0	0	0	0	0	0	0	196	0	0	412	0	0	0	0	169	0	0	303	0	0	0	0	0	0	0	0	0	0	0	0	0	0	0	272	0	0	0	299	0	0	0	198	284	0
	Limosilactobacillus_vaginalis	0	0	0	0	0	60343	0	0	0	0	0	42072	0	0	0	0	0	0	0	0	0	0	0	0	0	0	0	0	0	0	0	68435	0	0	698	0	0	0	0	0	0	0	0	990	258749	0	0	0
	Intestinibacillus_massiliensis	0	0	0	0	0	0	0	0	0	0	0	0	0	26	0	0	0	0	0	0	0	113	0	0	0	0	0	0	0	0	0	0	0	0	0	0	0	0	0	0	0	52	0	0	0	598	0	0
	Lactobacillus_johnsonii	0	0	25108	0	0	14094	50170	0	0	0	0	57043	0	0	0	0	0	0	0	0	0	0	0	0	0	27808	1187	545	0	0	0	262774	0	0	3504	0	0	0	0	0	0	0	0	0	31740	0	0	0
	UBA2897_.spp	0	0	0	0	0	0	0	0	0	0	0	0	0	0	0	0	49	0	0	0	0	0	0	0	0	0	0	0	0	0	0	0	0	0	0	0	0	0	984	1655	1457	0	0	0	0	0	0	676
	Bulleidia_.spp	0	0	0	0	0	0	0	0	0	0	0	0	0	13879	1735	0	0	0	0	1239	32	0	0	0	0	0	0	0	0	0	0	0	0	0	0	0	0	0	0	0	0	0	0	0	0	0	0	0
	Prevotella_oralis	0	0	0	0	0	0	0	0	0	0	0	0	0	0	0	0	0	49	0	0	0	0	0	0	0	0	0	0	0	0	0	0	0	0	0	0	0	0	0	0	0	0	119	0	225	0	0	122
	Streptococcus_macacae	0	0	99	0	0	0	26	0	0	0	0	0	0	0	0	0	0	0	0	0	0	0	0	0	0	0	70	0	0	0	0	0	0	0	0	0	0	0	0	0	0	0	0	62	0	0	0	0
	ER4_.spp	0	0	0	0	0	0	0	0	0	0	161553	0	0	392568	0	0	0	0	176784	0	77548	436284	15573	0	0	0	0	0	0	0	0	0	0	0	0	0	0	57183	0	0	0	91650	0	0	0	0	0	0
	Streptococcus_thermophilus	9166	8664	28035	3865	1296	13363	26415	0	177165	1146	0	4995	1289	1718	12088	112265	0	873	0	0	0	0	1480	486	2429	4020	15545	1210	1123	1167	0	52979	793	6996	1978	930	0	0	0	0	3098	0	566	30109	4215	0	0	0
	Lactobacillus_gasseri	0	0	26748	0	0	8973	48420	0	0	0	0	49368	0	0	0	0	0	0	0	0	0	0	0	0	0	108742	618	1116	0	0	0	229879	0	0	16742	0	0	0	0	0	0	0	0	0	149002	0	0	0
	Lactobacillus_bombicola	0	0	71	0	0	0	153	0	0	0	0	123	0	0	0	0	0	0	0	0	0	0	0	0	0	18	0	0	0	0	0	792	0	0	0	0	0	0	0	0	0	0	0	0	224	0	0	0
	Streptococcus_urinalis	102	0	125	0	0	0	0	0	0	0	0	0	0	0	0	0	0	0	0	0	0	0	0	0	82	0	125	0	0	0	0	165	0	0	0	0	0	0	0	0	0	0	0	62	0	0	0	0
	Coprococcus_A	0	0	0	0	0	0	0	0	0	0	3328	0	0	0	0	0	0	0	154851	0	0	1273	2160	0	0	0	0	0	0	0	0	0	0	0	0	0	0	8275	0	0	0	0	0	0	0	0	0	0
	Limisoma_gallistercoris	0	0	0	0	0	0	0	0	0	0	1430	0	370	0	0	0	0	1837	0	0	0	0	0	0	0	0	0	0	0	0	0	0	0	0	0	0	0	0	0	0	0	0	18	0	0	0	0	0
	Lactobacillus_gigeriorum	0	0	182	0	0	64	451	0	0	0	0	569	0	0	0	0	0	0	0	0	0	0	0	0	0	195	0	0	0	0	0	3077	0	0	0	0	0	0	0	0	0	0	0	0	519	0	0	0
	Streptococcus_sinensis	483	0	559	0	45	0	23	0	0	0	0	0	0	0	0	0	0	0	0	0	0	0	0	0	0	0	612	0	0	0	0	0	0	0	0	0	0	0	0	0	0	0	0	419	0	0	0	0
	Lactobacillus_colini	0	0	734	0	0	222	1509	0	0	0	0	1783	0	0	0	0	0	0	0	0	0	0	0	0	0	768	0	0	0	0	0	8406	0	0	0	0	0	0	0	0	0	0	0	0	1159	0	0	0
	Clostridium_F_niameyense	0	0	0	0	0	1309	0	0	781	0	0	0	0	0	0	0	0	0	0	0	0	0	0	0	176	0	0	0	0	0	0	0	0	0	0	0	0	0	0	0	0	0	0	0	0	0	0	0
	Lactobacillus_hominis	0	0	1330	0	0	1119	3742	0	0	0	0	5008	0	0	0	0	0	0	0	0	0	0	0	0	0	1080	0	0	0	0	0	20851	0	0	0	0	0	0	0	0	0	0	0	0	2210	0	0	0
	Lactobacillus_iners	0	0	176	0	0	161	570	0	0	0	0	620	0	0	0	0	0	0	0	0	0	0	0	0	0	206	0	0	0	0	0	3546	0	0	0	0	0	0	0	0	0	0	0	0	505	0	0	0
	Limivivens_.spp	0	0	0	0	0	0	0	0	0	0	790	0	0	2299	0	0	538	0	0	0	0	0	0	0	0	0	0	0	0	1180	0	0	0	0	0	0	0	4859	2930	0	0	6634	0	0	0	0	0	0
	Collinsella_tanakaei_A	0	14	0	0	0	0	0	0	0	0	0	0	0	0	0	87	0	130	0	0	28	0	0	0	0	0	0	0	0	0	0	0	0	0	0	0	0	0	0	0	0	0	0	0	0	0	0	0
	Faecalibacterium_prausnitzii_I	0	71374	0	2145	0	0	0	0	0	0	48737	0	37335	24723	1966	133308	0	19965	15105	23437	18386	402968	101120	12199	0	0	0	0	0	0	0	0	0	4108	0	19280	9226	37333	18215	0	4652	58197	5298	32367	262509	78866	8864	1375
	Mediterraneibacter_faecis	0	15656	0	123	0	0	0	0	0	1421	40905	0	26371	56176	0	9546	6098	7900	15830	3120	19696	63928	47830	619	0	0	0	0	0	862	9026	0	0	0	0	4668	231	29823	13263	5252	8557	58573	18469	6411	50224	135710	9201	4808
	Mailhella_excrementigallinarum	0	0	0	0	0	0	0	0	0	0	0	0	0	4476	0	0	47083	0	352	0	14776	0	0	0	0	0	0	0	0	0	0	0	0	0	0	0	0	0	0	0	0	0	0	0	0	0	0	0
	Senegalimassilia_faecalis	0	1657	0	0	0	0	0	0	0	0	0	0	0	0	1298	0	0	0	0	0	0	0	0	0	0	0	0	0	0	0	807	0	0	0	0	0	0	56	0	0	3202	0	0	0	0	0	0	0
	Succinivibrio_.spp	0	0	0	0	0	0	0	0	0	0	0	0	0	5730	0	0	0	0	0	0	0	115027	0	0	0	0	0	0	0	0	0	0	0	0	0	0	0	2289	0	0	0	0	0	0	0	0	0	47018
	Gemmiger_stercoripullorum	0	0	0	0	0	0	0	0	0	0	0	0	950	219	101	0	0	449	738	102	124	460	510	0	0	0	0	0	0	0	0	0	0	0	0	0	0	1740	304	0	0	1036	0	0	0	812	685	0
	Akkermansia_muciniphila_B	0	0	0	0	0	0	0	0	0	0	9319	0	11241	536	0	0	445208	0	8783	229	0	24780	18553	0	0	0	0	4072	0	200202	0	0	176798	0	0	12158	1432	8901	0	57048	3967	1962	0	0	0	44669	81	0
	Oxalobacter_.spp	0	0	0	0	0	0	0	0	0	0	0	0	0	4360	0	0	0	0	0	67	0	457	2333	0	0	0	0	0	0	0	0	0	0	0	0	0	0	0	0	0	0	0	0	0	0	0	0	0
	Bifidobacterium_moukalabense	0	2990	0	920	278	618	332	0	2736	4654	0	0	1071	0	3048	2860	276	3932	0	0	2727	0	0	353	2099	412	111	301	438	197	110	27	0	0	0	108	167	710	297	0	7945	0	1139	166	406	81	569	0
	Bifidobacterium_lemurum	0	0	0	0	0	0	0	0	0	0	0	0	0	0	16	16	0	79	0	0	0	0	0	0	0	0	0	0	0	0	0	0	0	0	0	0	0	0	0	0	0	0	0	0	0	0	0	0
	Paratractidigestivibacter_.spp	0	0	0	0	0	0	0	0	0	0	0	0	524	0	0	0	164	0	0	0	0	0	665	0	0	0	0	0	0	0	0	0	0	0	0	0	0	0	0	0	112	0	0	0	0	0	0	0
	Prevotella_lascolaii	0	0	0	0	0	0	0	0	0	0	0	0	0	0	0	0	0	858	0	0	0	0	0	0	0	0	0	0	0	0	0	0	0	0	0	0	0	0	0	0	0	0	214	0	0	0	0	464
	UBA4644_.spp	0	0	0	0	0	0	0	0	0	0	107	0	0	105	0	0	0	0	0	0	0	107	0	0	0	0	0	0	0	0	0	0	0	0	0	0	0	0	0	0	0	0	0	0	0	0	0	0
	Lactobacillus_xujianguonis	0	0	53	0	0	0	287	0	0	0	0	243	0	0	0	0	0	0	0	0	0	0	0	0	0	95	0	0	0	0	0	1085	0	0	0	0	0	0	0	0	0	0	0	0	508	0	0	0
	Streptococcus_ictaluri	109	0	298	0	0	0	89	0	0	0	0	0	0	0	0	0	0	0	0	0	0	0	0	0	0	0	0	0	0	0	0	88	0	0	0	0	0	0	0	0	0	0	0	0	0	0	0	0
	Rothia_aerolata	949	0	2186	0	10	0	0	0	0	0	0	0	0	0	0	0	0	0	0	0	0	0	0	0	0	127	344	0	0	0	0	0	0	0	0	0	0	0	0	0	0	0	0	0	0	0	0	0
	Escherichia_coli	0	769641	573548	118096	414253	0	1042512	156732	998979	335049	0	237812	511006	0	5520	388885	429198	261957	15112	83422	1523	44109	992	160676	791279	9601	1163940	914991	980	114359	1446713	1192174	1824202	2363065	105097	291746	153850	34515	86517	792941	57536	0	11177	1701253	76747	73223	0	0
	Pyramidobacter_piscolens	0	0	0	0	0	0	0	0	0	0	0	0	0	0	4240	0	0	0	0	0	0	0	0	0	0	0	0	0	0	0	0	0	0	0	0	0	0	0	0	40132	0	28579	0	0	1968	0	0	0
	Veillonella_.spp	0	0	0	0	0	22515	751	0	0	0	0	0	0	0	0	0	0	0	0	0	0	0	0	0	0	0	0	0	0	0	0	3045	0	0	0	0	0	0	0	0	59	0	0	0	0	0	0	0
	Galliscardovia_margollesii	0	28	0	0	0	0	0	0	0	28	0	0	0	0	14	111	0	0	0	0	0	0	0	0	0	0	0	0	0	0	0	0	0	0	0	0	0	0	0	0	28	0	0	0	0	0	0	0
	Streptococcus_castoreus	18	0	214	0	0	0	0	0	0	0	0	0	0	0	0	0	0	0	0	0	0	0	0	0	36	0	0	0	0	0	0	100	0	0	0	0	0	0	0	0	0	0	0	9	0	0	0	0
	Pauljensenia_.spp	60446	0	12416	0	34677	0	1484	0	0	1823	0	1135	0	0	0	1454	0	0	0	0	0	0	0	0	0	8723	43323	0	1305	0	0	0	346	0	0	0	438	0	0	0	522	0	0	2070	0	0	0	0
	Faecalibacterium_prausnitzii_E	0	18038	0	372	0	0	0	0	0	0	8538	0	8789	8173	252	35139	0	4353	4035	4112	4675	15217	25195	2361	0	0	0	0	0	0	0	0	0	936	0	3060	2365	17661	5190	0	858	10541	1252	9463	78374	22317	2155	318
	Streptococcus_agalactiae	0	0	415	0	0	0	209	0	0	0	0	0	0	0	0	0	0	0	0	0	0	0	0	0	384	0	178	0	0	0	0	346	0	0	0	0	0	0	0	0	0	0	0	30	0	0	0	0
	Mitsuokella_multacida	0	0	0	0	0	0	0	0	0	0	0	0	0	0	0	0	1289	0	0	0	34	0	0	0	0	0	0	0	0	0	0	0	0	0	0	0	0	0	3015	2754	3299	0	0	0	0	0	0	2291
	Lactobacillus_pasteurii	0	0	8	0	0	0	60	0	0	0	0	52	0	0	0	0	0	0	0	0	0	0	0	0	0	0	0	0	0	0	0	418	0	0	0	0	0	0	0	0	0	0	0	0	112	0	0	0
	Streptococcus_oralis_S	723	207	1549	0	0	0	0	0	0	0	0	0	0	0	0	0	0	0	0	0	0	0	0	0	0	0	0	0	0	0	0	0	0	0	0	0	0	0	0	0	390	0	0	0	0	0	0	0
	Rikenella_massiliensis	0	0	0	0	0	0	0	0	0	0	0	0	0	0	0	0	0	0	0	0	0	40	0	0	0	0	0	0	0	164	0	0	0	0	0	0	0	0	0	0	0	1332	0	0	0	0	0	0
	Duodenibacillus_.spp	0	0	0	0	0	0	0	0	0	0	9964	0	0	2718	0	0	0	0	456	0	0	0	0	0	0	0	0	0	0	0	0	0	0	0	0	983	0	0	0	0	0	0	0	0	0	0	0	192
	Fusobacterium_animalis	0	0	518	0	0	58	0	0	0	0	0	0	0	0	0	1117	1241	0	0	0	0	0	0	0	0	0	0	7305	0	0	2650	8417	0	0	0	0	0	0	0	1508	57	0	0	6760	9514	195	0	0
	Streptococcus_panodentis	188	0	431	0	0	0	0	0	0	0	0	0	0	0	0	0	0	0	0	0	0	0	0	0	0	0	207	0	0	0	0	0	0	0	0	0	0	0	0	0	0	0	0	396	0	0	0	0
	CAG-177_.spp	0	0	0	0	0	0	0	0	0	0	0	0	0	0	166339	0	0	0	0	0	351909	20823	0	0	0	0	0	0	0	0	0	0	0	0	0	0	0	29021	0	0	0	0	0	0	0	0	0	0
	Ellagibacter_isourolithinifaciens	0	0	0	0	0	0	0	0	0	0	0	0	0	740	981	0	0	0	0	0	0	0	0	0	0	0	0	0	0	0	0	0	0	0	0	0	0	0	0	0	6285	0	4126	0	0	0	0	0
	Streptococcus_catagoni	0	0	118	0	0	0	0	0	0	0	0	0	0	0	0	0	0	0	0	0	0	0	0	0	0	0	55	0	0	0	0	9	0	0	0	0	0	0	0	0	0	0	0	9	0	0	0	0
	Allisonella_pneumosintes	0	0	0	0	0	0	1127	0	0	0	0	0	0	0	0	0	0	0	0	0	0	3435	0	0	0	0	0	0	0	0	213	0	0	0	0	1688	0	0	0	0	0	0	0	0	3249	0	0	0
	Lactobacillus_rodentium	0	0	1025	0	0	623	2401	0	0	0	0	2864	0	0	0	0	0	0	0	0	0	0	0	0	0	1425	0	0	0	0	0	14201	0	0	89	0	0	0	0	0	0	0	0	0	2316	0	0	0
	Selenomonas_A_montiformis	0	0	0	0	0	0	0	0	0	0	0	0	0	0	0	0	0	0	0	0	0	0	0	0	0	0	0	0	0	0	0	0	0	0	0	0	0	0	803	1131	198	0	0	0	0	0	0	38
	UBA1367_.spp	0	0	0	0	0	0	0	0	54	0	0	0	83	0	0	27	0	0	0	0	0	0	0	0	0	0	0	0	0	0	0	0	0	0	0	0	0	0	0	0	0	0	0	0	0	0	0	0
	Gemmiger_avicola	0	0	0	0	0	0	0	0	0	0	0	0	519	111	0	0	0	274	202	23	0	114	227	0	0	0	0	0	0	0	0	0	0	0	0	0	0	1090	224	0	0	723	0	0	0	208	183	0
	Faecalibacterium_prausnitzii_C	0	39001	0	1278	0	0	0	0	0	0	40064	0	19778	45144	1385	66809	0	9955	45222	8627	16608	40106	51718	5954	0	0	0	0	0	0	0	0	0	2043	0	9506	6094	172269	12068	0	3468	36600	3436	16804	146097	39640	4518	5682
	Prevotella_enoeca	0	0	0	0	0	0	0	0	0	0	0	0	0	0	0	0	0	0	0	0	0	0	0	0	0	0	0	0	0	0	0	0	0	0	0	0	0	0	0	0	0	0	179	0	0	0	0	121
	Flemingibacterium_.spp	0	0	0	0	0	0	0	0	0	0	0	0	0	6880	0	0	0	0	0	0	0	1633	0	0	0	0	0	0	0	0	0	0	0	0	0	0	0	0	0	0	0	9736	0	0	0	0	0	0
	CAJFPI01_.spp	0	0	0	0	0	0	0	0	0	0	0	0	0	248	0	0	0	0	0	0	0	50	0	0	0	0	0	0	0	0	0	0	0	0	0	0	0	0	0	0	0	98	0	0	0	0	0	0
	CAG-302_.spp	0	0	0	0	0	0	0	0	0	0	0	0	0	48876	0	0	0	0	10742	0	17883	148558	0	0	0	0	0	0	0	0	0	0	0	0	0	0	0	0	0	0	0	0	0	0	0	0	0	0
	Eubacterium_limosum	0	0	0	1182	0	0	0	72802	0	0	0	0	0	0	0	0	0	0	0	0	0	0	5259	0	0	0	0	0	0	0	0	0	0	0	0	0	281	0	0	0	0	0	0	0	0	0	0	0
	Limosilactobacillus_portuensis	0	0	0	0	0	5202	0	0	0	0	0	183012	0	0	0	0	0	0	0	0	0	0	0	0	0	0	0	0	0	0	0	342294	0	0	1145	0	0	0	0	0	0	0	0	0	21898	0	0	0
	Limosilactobacillus_frumenti	0	0	0	0	0	499	0	0	0	0	0	2023	0	0	0	0	0	0	0	0	0	0	0	0	0	0	0	0	0	0	0	2660	0	0	0	0	0	0	0	0	0	0	0	0	4006	0	0	0
	AM51-8_.spp	0	0	0	0	0	0	0	0	0	0	12937	0	0	1349	0	0	0	0	3915	0	0	0	35	0	0	0	0	0	0	0	0	0	0	0	0	0	0	0	0	0	0	0	0	0	0	0	0	0
	UMGS1375_.spp	0	0	0	0	0	0	0	0	0	0	8535	0	0	3184	0	0	0	0	0	0	0	0	0	0	0	0	0	0	0	0	0	0	0	0	0	0	0	0	0	0	0	8179	0	0	0	0	0	0
	Bilophila_faecipullorum	0	0	0	0	0	0	0	0	0	0	1045	0	0	0	0	0	0	0	0	1556	0	1593	99	3016	0	0	0	0	0	0	2299	0	0	0	0	0	1330	0	458	0	0	0	0	0	0	3273	340	0
	Streptococcus_vestibularis	0	0	61162	0	0	8030	79309	0	0	0	0	0	0	0	0	0	0	0	0	0	0	0	0	1356	0	0	0	0	0	0	0	21906	1346	0	0	0	0	0	0	0	0	0	0	0	0	0	0	0
	Limosilactobacillus_fastidiosus	0	0	0	0	0	444	0	0	0	0	0	2069	0	0	0	0	0	0	0	0	0	0	0	0	0	0	0	0	0	0	0	4526	0	0	0	0	0	0	0	0	0	0	0	0	2672	0	0	0
	Prevotella_rara	0	0	0	0	0	0	0	0	0	0	0	0	0	0	0	0	0	196	0	0	0	0	0	0	0	0	0	0	0	0	0	0	0	0	0	0	0	0	0	0	0	0	345	0	0	0	0	522
	Avoscillospira_stercorigallinarum	0	0	0	0	0	0	0	0	0	0	0	0	0	383	0	0	0	0	0	0	0	565	0	0	0	0	0	0	0	0	0	0	0	0	0	0	0	78	0	0	0	60	0	0	0	0	0	0
	Baileyella_intestinalis	0	0	0	0	0	0	0	0	0	0	0	0	0	0	0	4432	0	0	0	0	0	0	0	0	0	0	0	0	0	0	6266	0	0	0	0	0	0	0	0	1777	0	0	0	0	0	0	0	0
	Limosilactobacillus_coleohominis	0	0	0	0	0	55	0	0	0	0	0	155	0	0	0	0	0	0	0	0	0	0	0	0	0	0	0	0	0	0	0	279	0	0	0	0	0	0	0	0	0	0	0	0	888	0	0	0
	Rothia_aeria	1239	0	3795	0	0	0	0	0	0	0	0	0	0	0	0	0	0	0	0	0	0	0	0	0	0	0	647	0	0	0	0	0	0	0	0	0	0	0	0	0	0	0	0	27	0	0	0	0
	Angelakisella_.spp	0	0	0	0	0	0	0	0	0	0	7754	0	0	0	0	0	81719	0	6807	0	0	0	0	0	0	0	0	0	0	0	0	0	0	0	0	0	0	48864	0	0	0	0	0	0	0	0	0	0
	Oscillibacter_ruminantium	0	0	0	0	0	0	0	0	0	0	0	0	0	189	0	0	0	0	0	0	0	162	0	0	0	0	0	0	0	0	0	0	0	0	0	0	0	0	0	0	0	54	0	0	0	0	134	0
	Finegoldia_magna	0	0	0	0	0	18188	0	0	0	0	0	0	0	0	0	0	0	0	0	0	0	0	0	0	0	0	23	0	0	0	0	494	0	0	0	0	0	0	0	268	0	0	0	0	0	0	0	0
	Faecalibacterium_prausnitzii_H	0	23271	0	458	0	0	0	0	0	0	10337	0	11979	6518	206	48339	0	6868	6153	4570	6925	15845	33169	4595	0	0	0	0	0	0	0	0	0	1059	0	6120	3565	16401	7861	0	1940	10826	1573	10490	84918	26851	2772	28
	Neoruminococcus_faecicola	0	0	0	0	0	0	0	0	0	0	16	0	0	122	0	0	0	0	16	0	0	173	0	0	0	0	0	0	0	0	0	0	0	0	0	0	0	171	0	0	0	189	0	0	0	0	0	0
	Limosilactobacillus_pontis_A	0	0	0	0	0	0	0	0	0	0	0	489	0	0	0	0	0	0	0	0	0	0	0	0	0	0	0	0	0	0	0	36	0	0	0	0	0	0	0	0	0	0	0	0	1652	0	0	0
	Butyrivibrio_A_crossotus	0	0	0	0	0	0	0	0	0	0	0	0	0	115468	0	0	0	0	0	0	0	60351	0	0	0	0	0	0	0	0	0	0	0	0	0	0	0	20879	0	0	0	0	0	0	0	0	0	0
	Limosilactobacillus_urinaemulieris	0	0	0	0	0	10339	0	0	0	0	0	26268	0	0	0	0	0	0	0	0	0	0	0	0	0	0	0	0	0	0	0	46875	0	0	748	0	0	0	0	0	0	0	0	0	36949	0	0	0
	Clostridium_P_ventriculi	0	0	0	0	0	0	0	0	0	0	0	0	0	16199	0	0	0	0	0	333	0	4318	7463	0	1524	0	0	0	0	0	0	0	0	0	0	0	0	0	0	0	0	0	633	0	0	0	0	3020
	CAG-127_.spp	0	0	0	0	0	0	0	0	0	0	14023	0	0	59014	0	0	0	0	12841	0	1512	5097	0	0	0	0	0	0	0	0	0	0	0	0	0	0	0	0	0	0	0	0	0	0	0	0	0	0
	Limosilactobacillus_timonensis	0	0	0	0	0	0	0	0	0	15	0	61	0	0	0	0	0	0	0	0	0	0	0	0	0	0	0	0	0	0	0	0	0	0	0	0	0	0	0	0	0	0	0	0	417	0	0	0
	Streptococcus_sobrinus	0	0	0	0	0	0	0	0	0	0	0	0	0	0	0	0	0	0	0	0	466	0	0	0	0	0	0	0	0	0	0	0	0	0	0	0	0	0	0	0	1385	0	0	13441	0	0	0	0
	HGM04593_.spp	0	0	0	0	0	0	0	0	0	0	12	0	0	0	0	0	0	49	0	0	0	0	0	0	0	0	0	0	0	0	0	0	0	0	0	0	0	24	0	0	0	0	0	0	0	0	0	0
	Gemmiger_qucibialis	0	0	0	0	0	0	0	0	0	0	0	0	604	7211	0	0	0	496	483	2377	140	6967	3828	0	0	0	0	0	0	0	0	0	0	0	0	0	0	13753	5359	0	0	9751	0	0	0	659	426	0
	Limosilactobacillus_secaliphilus	0	0	0	0	0	0	0	0	0	14	0	50	0	0	0	0	0	0	0	0	0	0	0	0	0	0	0	0	0	0	0	0	0	0	0	0	0	0	0	0	0	0	0	0	272	0	0	0
	VUNA01_.spp	0	0	0	0	0	0	0	0	0	0	0	0	0	0	19697	0	0	8338	0	0	2524	0	0	0	0	0	0	0	0	0	0	0	0	0	0	0	0	0	0	0	0	0	0	0	0	0	0	0
	Lactobacillus_amylolyticus	0	0	9	0	0	46	123	0	0	0	0	178	0	0	0	0	0	0	0	0	0	0	0	0	0	18	0	0	0	0	0	817	0	0	0	0	0	0	0	0	0	0	0	0	490	0	0	0
	Selenomonas_B_ruminantium_A	0	0	0	0	0	0	0	0	0	0	0	0	0	0	0	0	0	0	0	0	0	0	0	0	0	0	0	0	0	0	0	0	0	0	0	0	0	0	178	296	180	0	0	0	0	0	0	0
	Mailhella_merdavium	0	0	0	0	0	0	0	0	0	0	0	0	0	83	0	0	1999	0	0	0	546	0	0	0	0	0	0	0	0	0	0	0	0	0	0	0	0	0	0	0	0	0	0	0	0	0	0	0
	Streptococcus_acidominimus	25	0	77	0	0	0	0	0	0	0	0	0	0	0	0	0	0	0	0	0	0	0	0	0	0	0	89	0	0	0	0	0	0	0	0	0	0	0	0	0	0	0	0	0	0	0	0	0
	UBA3796_.spp	0	0	0	0	0	0	0	0	0	0	0	0	0	0	0	0	0	0	0	0	0	0	0	0	0	0	0	0	0	0	0	0	0	0	0	0	0	0	202	327	99	0	0	0	0	0	0	0
	Prevotella_multiformis	0	0	0	0	0	0	0	0	0	0	0	0	0	0	0	0	0	36	0	0	0	0	0	0	0	0	0	0	0	0	0	0	0	0	0	0	0	0	0	0	0	0	0	0	0	0	0	360
	Limosilactobacillus_antri	0	0	0	0	0	0	0	0	0	0	0	6480	0	0	0	0	0	0	0	0	0	0	0	0	0	0	0	0	0	0	0	0	0	0	0	0	0	0	0	0	0	0	0	26	24363	0	0	0
	Desulfovibrio_gallistercoris	0	0	0	0	0	0	0	0	0	0	0	0	0	135	0	0	0	0	0	0	27	659	0	0	0	0	0	0	0	0	0	0	0	0	0	0	0	0	0	0	0	0	0	0	0	0	0	0
	Coprococcus_A_catus	0	0	0	0	0	0	0	0	0	0	0	0	0	1825	0	0	0	0	3559	488	0	0	13914	0	0	0	0	0	0	0	0	0	0	0	0	0	0	16175	7033	0	0	4670	0	0	0	0	0	0
	Campylobacter_infans	0	0	0	0	0	0	0	0	0	0	210338	0	0	25779	0	0	0	0	0	0	3308	0	0	0	0	0	0	0	0	0	0	0	0	0	0	0	0	0	0	0	0	0	0	0	0	0	0	0
	Rothia_terrae	14	0	181	0	0	0	0	0	0	0	0	0	0	0	0	0	0	0	0	0	0	0	0	0	0	0	27	0	0	0	0	0	0	0	0	0	0	0	0	0	0	0	0	0	0	0	0	0
	Limosilactobacillus_gorillae	0	0	0	0	0	0	0	0	0	0	0	247	0	0	0	0	0	0	0	0	0	0	0	0	0	0	0	0	0	0	0	0	0	0	0	0	0	0	0	0	0	0	0	378	2190	0	0	0
	Peptostreptococcus_anaerobius	0	0	0	0	0	0	110	481	4599	0	0	0	0	0	0	0	0	0	0	0	0	0	0	0	0	0	0	0	0	0	0	0	0	0	0	0	0	0	0	0	0	0	0	0	0	0	0	0
	Limosilactobacillus_.spp	0	0	0	0	0	992	0	0	0	0	0	4348	0	0	0	0	0	0	0	0	0	0	0	0	0	0	0	0	0	0	0	6051	0	0	0	0	0	0	0	0	0	0	0	0	7572	0	0	0
	Alistipes_senegalensis	0	0	0	0	0	0	0	0	0	0	0	0	0	4963	0	0	0	0	0	0	0	4068	0	0	0	0	0	0	0	0	0	0	0	0	0	0	0	4111	0	0	0	0	0	0	0	511	4019	0
	UBA7597_.spp	0	0	0	0	0	0	0	0	0	0	12895	0	0	22619	0	0	0	0	0	0	0	1594	0	0	0	0	0	0	0	0	0	0	0	0	0	0	0	0	0	0	0	0	0	0	0	0	0	0
	Lactobacillus_intestinalis	0	0	268	0	0	181	894	0	0	0	0	989	0	0	0	0	0	0	0	0	0	0	0	0	0	22	0	0	0	0	0	4228	0	0	0	0	0	0	0	0	0	0	0	0	1162	0	0	0
	Akkermansia_intestinavium	0	0	0	0	0	0	0	0	0	0	50	0	0	0	0	0	1878	0	0	0	0	90	0	0	0	0	0	12	0	864	0	0	751	0	0	63	0	63	0	241	0	0	0	0	0	328	0	0
	CAG-449_.spp	0	0	0	0	0	0	0	0	0	0	1707	0	0	5237	0	0	0	0	2692	0	0	0	0	0	0	0	0	0	0	0	0	0	0	0	0	0	0	0	0	0	0	0	0	0	0	0	0	0
	CAG-194_.spp	0	0	0	0	0	0	0	0	0	0	0	0	0	11339	0	0	0	0	1944	0	0	0	0	0	0	0	0	0	0	0	0	0	0	0	0	0	0	0	0	0	0	9172	0	0	0	0	0	0
	Staphylococcus_epidermidis	53859	0	19032	0	0	3953	2228	0	0	0	0	0	0	0	0	0	0	0	0	0	0	0	0	0	0	0	608	0	0	0	2147	1539	0	0	0	0	0	0	0	0	4450	0	0	0	0	0	0	0
	CAG-245_.spp	0	0	0	0	0	0	0	0	0	0	0	0	0	0	0	0	0	0	22105	0	0	39272	0	0	0	0	0	0	0	0	0	0	0	0	0	0	0	2713	0	0	0	110	0	0	0	0	0	0
	Prevotella_maculosa	0	0	0	0	0	0	0	0	0	0	0	0	0	0	0	0	0	0	0	0	0	0	0	0	0	0	0	0	0	0	0	0	0	0	0	0	0	0	0	0	0	0	70	0	0	0	0	208
	Gemmiger_stercoravium	0	0	0	0	0	0	0	0	0	0	0	0	537	84	0	0	0	330	360	0	82	137	220	0	0	0	0	0	0	0	0	0	0	0	0	0	0	1481	0	0	0	620	0	0	0	245	193	0
	Limosilactobacillus_alvi	0	0	0	0	0	0	0	0	0	0	0	170	0	0	0	0	0	0	0	0	0	0	0	0	0	0	0	0	0	0	0	50	0	0	0	0	0	0	0	0	0	0	0	0	573	0	0	0
	Streptococcus_koreensis	2485	0	0	0	0	0	0	0	0	0	0	0	0	0	0	0	0	0	0	0	0	0	0	0	0	0	1245	0	0	0	0	0	0	0	0	0	0	0	0	0	0	0	0	619	0	0	0	0
	CAG-95_.spp	0	0	0	0	0	0	0	0	0	0	1713	0	0	13715	0	0	0	0	13875	0	0	2346	299	0	0	0	0	0	0	0	0	0	0	0	0	0	0	0	0	0	0	19734	0	0	0	0	0	0
	Porphyromonas_.spp	0	0	0	0	0	0	0	0	400	847	0	0	0	0	0	0	0	0	0	0	0	35965	0	0	0	0	0	0	0	563	0	0	0	0	0	0	0	0	0	0	0	0	0	0	0	0	0	0
	Akkermansia_muciniphila	0	0	0	0	0	0	0	0	0	0	111239	0	2427	14989	0	0	161736	0	1910	0	0	296042	4179	7000	0	0	0	69591	0	78912	0	0	64549	0	0	166554	0	145088	3835	744729	57795	42261	0	0	0	534911	8637	0
	Streptococcus_azizii	63	0	86	0	0	0	0	0	0	0	0	0	0	0	0	0	0	0	0	0	0	0	0	0	0	0	21	0	0	0	0	0	0	0	0	0	0	0	0	0	0	0	0	0	0	0	0	0
	Akkermansia_glycaniphila	0	0	0	0	0	0	0	0	0	0	14	0	0	0	0	0	1464	0	0	0	0	144	0	0	0	0	0	0	0	724	0	0	412	0	0	87	0	144	0	747	0	0	0	0	0	570	0	0
	Porphyromonas_uenonis_A	0	0	0	0	0	0	0	0	0	562	0	0	0	0	974	0	0	0	0	0	0	1787	0	0	0	0	0	0	0	0	621	0	0	0	0	0	0	0	0	0	0	0	0	0	0	0	0	0
	Alloprevotella_tannerae	0	0	0	0	0	0	0	0	0	0	0	0	0	0	0	0	0	0	0	0	0	0	0	0	0	0	0	0	0	0	0	0	0	0	0	12908	0	0	0	0	1508	0	0	0	0	170	0	0
	Stercorousia_.spp	0	0	0	0	0	0	0	0	0	0	90130	0	0	53116	0	0	0	0	0	0	65093	0	0	0	0	0	0	0	0	0	0	0	0	0	0	0	0	35450	0	0	0	0	0	0	0	0	0	0
	Lactobacillus_hamsteri	0	0	320	0	0	120	486	0	0	0	0	536	0	0	0	0	0	0	0	0	0	0	0	0	0	198	0	0	0	0	0	3183	0	0	0	0	0	0	0	0	0	0	0	0	888	0	0	0
	Limosilactobacillus_rudii	0	0	0	0	0	56	0	0	0	0	0	268	0	0	0	0	0	0	0	0	0	0	0	0	0	0	0	0	0	0	0	708	0	0	0	0	0	0	0	0	0	0	0	0	836	0	0	0
	Lactobacillus_.spp	0	0	312	0	0	111	916	0	0	0	0	789	0	0	0	0	0	0	0	0	0	0	0	0	0	217	0	0	0	0	0	4544	0	0	0	0	0	0	0	0	0	0	0	0	793	0	0	0
	Alistipes_timonensis	0	0	0	0	0	0	0	0	0	0	0	0	0	0	0	0	0	0	0	0	0	6968	0	0	0	0	0	0	0	0	0	0	0	0	0	0	0	9464	0	0	0	0	0	0	0	1363	5849	0
	Klebsiella_quasipneumoniae	277674	0	0	0	0	69915	0	0	15712	4671	0	0	0	0	0	19556	0	0	0	0	0	0	0	0	3361	0	0	0	368356	0	0	0	0	55796	0	0	0	0	0	0	0	9158	0	0	0	0	0	0
	Enterococcus_A_pseudoavium	0	0	0	0	1233	0	0	0	566	575	0	0	0	0	0	379	0	0	0	0	0	0	0	1832	0	0	0	0	3545	0	632	23	0	0	0	0	208	0	0	0	0	0	0	0	80	0	0	0
	Pauljensenia_bouchesdurhonensis	2008	0	0	0	909	0	0	0	0	0	0	0	0	0	0	0	0	0	0	0	0	0	0	0	0	0	3636	0	0	0	0	0	0	0	0	0	0	0	0	0	0	0	0	0	0	0	0	0
	CAG-882_.spp	0	0	0	0	0	0	0	0	0	0	731	0	0	9357	0	0	0	0	0	0	0	6364	0	0	0	0	0	0	0	0	0	0	0	0	0	0	0	0	0	0	0	0	0	0	0	0	0	0
	Eubacterium_.spp	0	0	0	2993	0	0	0	4003	0	0	0	0	0	0	0	0	0	0	0	0	0	0	302	0	0	0	0	0	0	182	0	0	0	0	0	0	3407	0	0	0	0	0	0	0	0	0	0	0
	Gemella_haemolysans_B	9688	0	12973	0	0	0	339	0	0	0	0	0	0	0	0	0	0	0	0	0	0	0	0	0	0	0	558	0	0	0	0	0	0	0	0	0	0	0	0	0	0	0	0	0	0	0	0	0
	Fusobacterium_nucleatum_J	0	0	1711	0	0	0	0	0	0	0	0	0	0	0	0	0	0	0	0	0	0	0	0	0	0	0	0	0	0	0	0	0	0	0	0	0	0	0	0	898	0	0	0	0	1106	0	0	0
	Faecalibacterium_avium	0	3731	0	0	0	0	0	0	0	0	4846	0	1854	2449	0	6242	0	1122	752	986	1069	4700	8114	612	0	0	0	0	0	0	0	0	0	0	0	457	652	4382	1235	0	0	2285	0	946	12504	4065	575	0
	Haemophilus_A_parahaemolyticus	0	19647	0	0	0	0	0	0	0	0	0	3308	0	0	0	0	0	0	0	0	0	0	0	0	0	0	0	0	0	0	0	0	17733	0	0	661	0	0	0	0	0	0	0	0	0	0	0	0
	Varibaculum_cambriense	0	0	0	0	0	6393	0	0	0	0	0	0	0	0	0	519	0	0	0	0	0	0	0	0	0	0	0	0	0	2970	0	276	0	0	0	0	0	0	0	0	0	0	0	0	0	0	0	0
	Pauljensenia_culturomici	391	0	0	0	49	0	0	0	0	0	0	0	0	0	0	0	0	0	0	0	0	0	0	0	0	0	629	0	0	0	0	0	0	0	0	0	0	0	0	0	0	0	0	0	0	0	0	0
	Enterococcus_A_gilvus	0	0	0	0	1270	0	0	0	453	738	0	0	0	0	0	0	0	0	0	0	0	0	0	3104	0	0	0	0	6610	0	444	0	0	0	0	0	442	0	0	0	0	0	0	0	0	0	0	0
	Gemella_morbillorum	1747	0	4987	0	0	0	0	0	0	0	0	0	0	0	0	0	0	0	0	0	0	0	0	0	0	0	278	0	0	0	0	0	0	0	0	0	0	0	0	0	0	0	0	0	0	0	0	0
	Papillibacter_cinnamivorans	0	0	0	0	0	0	0	0	0	0	0	0	0	24	0	0	0	0	0	0	0	48	0	0	0	0	0	0	0	0	0	0	0	0	0	0	0	0	0	0	0	60	0	0	0	0	24	0
	Fusobacterium_nucleatum	0	0	500	0	0	207	0	0	0	0	0	0	0	0	0	0	94	0	0	0	0	0	0	0	0	0	0	1054	0	0	0	786	0	0	0	0	0	0	0	119	0	0	0	1433	2683	78	0	0
	CAG-170_.spp	0	0	0	0	0	0	0	0	0	0	1635	0	0	97945	21081	0	2787	0	4410	0	3335	124911	0	0	0	0	0	0	0	0	0	0	0	0	0	0	0	0	0	0	0	0	0	0	0	0	0	0
	Porphyromonas_asaccharolytica	0	0	0	0	0	0	0	0	0	0	0	0	0	0	0	0	0	0	0	0	0	115	0	0	0	0	0	0	0	1132	2750	0	0	0	0	0	0	0	0	0	0	0	0	0	0	0	0	0
	Lactobacillus_panisapium	0	0	0	0	0	0	17	0	0	0	0	0	0	0	0	0	0	0	0	0	0	0	0	0	0	0	0	0	0	0	0	213	0	0	0	0	0	0	0	0	0	0	0	0	96	0	0	0
	Copromonas_.spp	0	41598	0	0	0	0	0	0	0	0	19898	0	18116	12098	1803	170843	26741	3369	2230	10828	10714	2569	18795	33606	0	0	0	0	0	0	0	0	0	0	0	699034	61379	9130	11017	0	587	60202	7901	46503	11619	35334	105	5999
	Escherichia_marmotae	0	172223	107718	20439	139290	0	229812	41911	284398	69503	0	56245	121334	0	0	94878	86184	48461	1645	17060	0	6694	0	34061	272688	1614	271498	211791	0	52766	317264	248534	371278	533032	13889	58132	32997	6321	14443	162015	15831	0	1639	374164	29843	15404	0	0
	Enterococcus_A_avium	0	0	0	5859	50789	0	0	0	1168	30062	0	0	0	0	0	23516	0	0	0	0	0	0	0	68972	0	0	1078	0	7878	2437	38899	0	0	0	0	0	125	0	0	0	0	0	0	0	9361	0	0	0
	Collinsella_tanakaei	0	0	0	0	0	0	0	0	0	0	0	0	0	0	0	995	0	1072	0	0	0	0	32	0	0	0	0	0	0	0	0	0	0	0	0	0	0	0	0	0	0	0	0	0	0	0	0	0
	Fusobacterium_vincentii	0	0	0	0	0	203	0	0	0	0	0	0	0	0	0	0	0	0	0	0	0	0	0	0	0	0	0	1515	0	0	333	396	0	0	0	0	0	0	0	764	0	0	0	2288	1821	0	0	0
	Enterococcus_A_hulanensis	0	0	0	0	3006	0	0	0	2024	1561	0	0	0	0	0	705	0	0	0	0	0	0	0	5340	0	0	0	0	13043	0	1706	241	0	0	0	0	933	0	0	0	0	0	0	0	0	0	0	0
	JAHALF01_.spp	158549	0	0	0	4753	6013	0	0	0	0	0	0	0	0	0	4320	0	0	0	0	0	0	0	0	0	29320	0	0	0	0	0	0	3969	0	0	0	1400	0	0	0	0	0	0	0	0	0	0	0
	Neobittarella_massiliensis	0	0	0	0	0	0	0	0	0	0	29	0	295	0	0	0	0	0	0	0	0	216	541	0	0	0	0	0	0	0	0	0	0	0	0	0	0	132	0	0	0	278	0	0	0	1341	0	0
	UBA1221_.spp	0	0	0	0	0	0	0	0	0	0	1199	0	0	372	0	0	0	0	0	0	0	0	0	0	0	0	0	0	0	0	0	0	0	0	0	0	0	0	0	0	0	0	0	0	0	0	0	0
	Proteus_mirabilis	0	0	0	0	0	0	0	0	36150	60276	0	0	0	0	0	52307	0	0	0	0	0	0	0	0	0	0	0	0	0	0	2187	0	15084	0	0	0	0	0	0	918	0	0	0	0	20114	0	0	0
	Proteus_myxofaciens	0	0	0	0	0	0	0	0	10941	2024	0	0	0	0	0	1695	0	0	0	0	0	0	0	0	0	0	0	0	0	0	0	0	73	0	0	0	0	0	0	0	0	0	0	0	437	0	0	0
	Prevotella_fusca	0	0	0	0	0	0	0	0	0	0	0	0	0	0	0	0	0	0	0	0	0	0	0	0	0	0	0	0	0	0	0	0	0	0	0	0	0	0	0	0	0	0	34	0	0	0	0	197
	Sodalis_A_praecaptivus	303	0	0	0	0	101	0	0	249	0	0	0	0	0	0	201	0	0	0	0	0	0	0	0	0	0	0	0	1659	0	0	0	0	252	0	0	0	0	0	0	0	0	0	0	0	0	0	0
	Limosilactobacillus_oris	0	0	0	0	0	0	0	0	0	0	0	56539	0	0	0	0	0	0	0	0	0	0	0	0	0	0	0	0	0	0	0	0	0	0	0	0	0	0	0	0	0	0	0	1888	184236	0	0	0
	UMGS856_.spp	0	0	0	0	0	0	0	0	0	0	0	0	0	750	0	0	0	0	307	0	0	158	0	0	0	0	0	0	0	0	0	0	0	0	0	0	0	0	0	0	0	0	0	0	0	0	107	0
	Clostridium_C_acetireducens	0	0	0	0	0	74	0	0	63	0	0	0	0	0	0	0	0	0	0	0	0	0	0	0	150	0	0	0	0	0	0	0	0	0	0	0	0	0	0	0	0	0	0	0	0	0	0	0
	Bilophila_wadsworthia	0	0	0	0	0	0	0	0	0	0	15642	0	0	8868	7032	0	0	6338	2815	18606	4031	17783	7137	0	0	0	0	0	0	0	24790	0	0	0	0	0	23943	0	5246	0	0	0	0	0	0	0	0	0
	Porphyromonas_uenonis	0	0	0	0	0	0	0	0	0	0	0	0	0	0	0	0	0	0	0	0	0	168	0	0	0	0	0	0	0	0	156	0	0	0	0	0	0	0	0	0	0	0	0	0	0	0	0	0
	Lactobacillus_apis	0	0	0	0	0	0	25	0	0	0	0	24	0	0	0	0	0	0	0	0	0	0	0	0	0	0	0	0	0	0	0	271	0	0	0	0	0	0	0	0	0	0	0	0	146	0	0	0
	Staphylococcus_hominis	608	0	18426	0	0	0	0	0	0	0	0	0	0	0	0	0	0	0	0	0	0	0	0	0	0	0	7129	0	0	0	0	1381	0	0	0	0	0	0	0	0	4618	0	0	0	0	0	0	0
	Gabonibacter_massiliensis	0	0	0	0	0	0	0	0	0	0	0	0	0	0	77	0	0	219	0	0	0	287	0	0	0	0	0	0	0	0	0	0	0	0	0	0	0	0	0	394	0	0	0	0	0	0	0	0
	Barnesiella_intestinihominis	0	0	0	0	0	0	0	0	0	0	0	0	0	145776	417457	0	0	0	0	0	0	140373	0	0	0	0	0	0	0	0	0	0	0	9795	0	0	0	0	0	0	0	0	0	0	0	0	0	0
	Klebsiella_pneumoniae	1563711	0	0	0	11171	517622	0	3337	106672	0	0	0	0	0	0	171696	0	0	0	0	0	0	0	2216	38985	0	0	0	1245282	0	0	17993	733	113957	0	0	0	0	0	0	0	0	0	0	0	27487	770	0
	Staphylococcus_aureus	24584	0	228291	0	0	366	1536	0	0	0	0	0	0	0	0	0	0	0	0	0	0	0	0	0	0	7948	0	0	0	0	1291	0	0	0	0	0	0	0	0	0	0	0	0	0	0	0	0	0
	Coprococcus_.spp	0	0	0	0	0	0	0	0	0	0	0	0	0	0	0	0	0	0	0	0	758	407	32	0	0	0	0	0	0	0	0	0	0	0	0	0	0	0	0	0	0	0	0	0	0	0	0	0
	Christensenella_minuta	0	0	0	0	0	0	0	0	0	0	0	0	0	0	0	0	0	0	0	0	0	0	0	0	0	0	0	0	0	0	0	0	0	0	0	0	0	0	0	0	0	0	0	0	0	2509	583	0
	Acetatifactor_intestinalis	0	0	0	0	0	0	0	0	0	0	52995	0	8547	14730	3919	0	0	0	126261	43863	6463	16160	176215	0	0	0	0	0	0	0	0	0	0	0	0	0	0	26179	0	0	0	288085	0	0	0	177126	28569	0
	Klebsiella_africana	94821	0	0	0	0	32240	0	0	5460	0	0	0	0	0	0	7098	0	0	0	0	0	0	0	0	847	0	0	0	113414	0	0	0	0	6856	0	0	0	0	0	0	0	0	0	0	0	0	0	0
	Blautia_A_obeum	0	0	0	0	0	0	0	0	0	0	5179	0	18021	2594	13354	0	0	4784	6095	41691	12319	1436	6543	0	0	0	0	0	0	183	0	0	0	0	0	10486	2133	138	498	0	0	3825	8851	0	0	0	0	969
	Akkermansia_muciniphila_C	0	0	0	0	0	0	0	0	0	0	715	0	676	0	0	0	33904	0	0	0	0	0	350	0	0	0	0	0	0	14041	0	0	22663	0	0	726	0	0	0	5623	0	0	0	0	0	0	0	0
	Faecalibacterium_prausnitzii_A	0	0	0	0	0	0	0	0	0	0	96141	0	0	109658	0	0	0	0	0	0	0	7363	43394	0	0	0	0	0	0	0	0	0	0	0	0	0	0	281	10224	0	0	220	0	0	0	0	0	0
	Phascolarctobacterium_A	0	0	0	0	0	0	0	0	0	0	28694	0	0	18263	0	0	0	0	9755	0	0	0	0	88	0	0	0	0	0	0	0	0	0	0	0	0	0	0	0	0	0	0	0	0	0	0	0	0
	Gemella_cuniculi	643	0	761	0	0	0	0	0	0	0	0	0	0	0	0	0	0	0	0	0	0	0	0	0	0	0	108	0	0	0	0	0	0	0	0	0	0	0	0	0	0	0	0	0	0	0	0	0
	Lactobacillus_acetotolerans	0	0	0	0	0	0	0	0	0	0	0	0	0	0	0	0	0	0	0	0	0	0	0	0	0	0	0	0	0	0	0	315	0	0	0	0	0	0	0	0	0	0	0	0	354	0	0	0
	Faecalibacterium_prausnitzii	0	0	0	0	0	0	0	0	0	0	38090	0	0	20632	0	0	0	0	0	2116	0	38090	20632	0	0	0	0	0	0	0	0	0	0	0	0	0	0	50787	0	0	0	0	0	0	0	0	0	0
	Heteroruminococcus_faecigallinarum	0	0	0	0	0	0	0	0	0	0	0	0	0	0	0	0	0	0	0	0	0	55	0	0	0	0	0	0	0	0	0	0	0	0	0	0	0	67	0	0	0	0	0	0	0	0	0	0
	Faecalibacterium_prausnitzii_J	0	0	0	0	0	0	0	0	0	0	63160	0	0	20930	0	0	0	0	0	567	340	152362	12533	0	0	0	0	0	0	0	0	0	0	0	0	0	0	6703	919	0	0	283	0	0	0	0	0	0
	Faecalibacterium_.spp	0	67680	0	941	0	0	0	0	0	0	122567	0	33674	60079	1384	148388	0	20127	17110	16325	22484	75411	138912	12172	0	0	0	0	0	0	0	0	0	4217	0	17751	11272	54477	32762	0	3941	41166	6164	29015	269457	80572	8939	1727
	Staphylococcus_lugdunensis	200	0	1341	0	0	0	0	0	0	0	0	0	0	0	0	0	0	0	0	0	0	0	0	0	0	0	0	0	0	0	0	0	0	0	0	0	0	0	0	0	0	0	0	0	0	0	0	0
	Prevotella_buccalis	0	0	0	0	0	0	0	0	167	0	0	0	0	0	0	0	0	0	0	0	0	0	0	0	0	0	0	0	0	1095	1660	0	0	0	0	0	0	0	0	0	0	0	0	0	0	0	0	0
	Bacteroides_intestinalis_A	0	0	0	0	0	0	0	0	0	0	2121	0	0	0	0	0	0	0	0	0	0	2626	251	0	0	0	0	0	0	0	0	0	0	0	0	0	0	0	4346	0	0	0	0	0	0	0	0	0
	Eisenbergiella_.spp	0	0	0	37652	0	0	0	0	0	0	2770	0	0	6814	2534	0	1435	0	6854	2818	0	538	4362	0	0	0	0	0	0	0	0	0	0	0	0	0	296	18978	3261	0	0	43196	0	5129	0	9019	3101	0
	Faecalibacterium_prausnitzii_D	0	7775	0	96	0	0	0	0	0	0	25204	0	5549	25807	276	20663	0	3769	11669	17943	17283	64199	26899	1520	0	0	0	0	0	0	0	0	0	409	0	2586	736	38335	12655	0	536	5345	2603	2927	30404	12175	839	7036
	Dialister_succinatiphilus	0	0	0	0	0	0	0	0	0	0	0	0	0	0	0	45	0	0	0	0	0	0	0	0	0	0	0	0	0	494	0	0	0	0	0	0	0	0	493	0	0	0	0	0	0	0	0	0
	Prevotella_bivia	0	0	0	0	0	0	0	0	0	0	0	0	0	0	0	0	0	0	0	0	0	0	0	0	0	0	0	0	0	0	0	0	0	0	0	0	0	0	0	0	692	0	0	0	7517	0	0	0
	Sutterella_wadsworthensis	0	54399	0	0	0	4007248	0	0	0	0	0	0	10328	0	2829	0	0	1884	0	0	8349	0	4558	0	0	0	0	0	0	0	0	0	0	0	0	164080	48637	2626	0	392652	0	0	0	0	0	2685	1083	2115
	Hydrogenoanaerobacterium_.spp	0	0	0	0	0	0	0	0	0	0	0	0	0	0	0	0	0	0	0	0	0	55	0	0	0	0	0	0	0	0	0	0	0	0	0	0	0	0	0	0	0	168	0	0	0	0	0	0
	Enterococcus_A_hermanniensis	0	0	0	0	770	0	0	0	261	425	0	0	0	0	0	156	0	0	0	0	0	0	0	1166	0	0	0	0	2215	0	488	0	0	0	0	0	83	0	0	0	0	0	0	0	0	0	0	0
	Streptococcus_salivarius	4991	17723	23992	0	474	10408	15678	0	25171	420	0	5394	2251	7386	1394	13971	0	463	0	0	99	10074	1790	1759	699	501	11257	195	1637	2533	0	43871	556	1346	1005	515	175	0	1058	0	3409	0	391	21363	3311	0	0	0
	CAG-115_.spp	0	0	0	0	0	0	0	0	0	0	3852	0	0	0	0	0	0	0	0	0	0	0	0	0	0	0	0	0	0	0	0	0	0	0	0	0	0	0	0	0	0	706	0	0	0	0	0	0
	Gemella_sanguinis	1537	0	1754	0	0	0	0	0	0	0	0	0	0	0	0	0	0	0	0	0	0	0	0	0	0	0	173	0	0	0	0	0	0	0	0	0	0	0	0	0	0	0	0	0	0	0	0	0
	Faecalicoccus_acidiformans	0	0	0	0	0	0	0	0	0	0	8	0	0	0	0	0	0	0	0	0	0	0	0	0	0	0	0	0	0	0	0	0	0	0	0	0	0	0	0	0	0	0	0	86	0	0	0	0
	HGM13634_.spp	0	0	0	0	0	0	0	0	0	0	0	0	0	0	0	0	0	0	0	0	0	374	0	0	0	0	0	0	0	0	0	0	0	0	0	0	0	0	0	0	0	595	0	0	0	0	0	0
	Pseudoscilispira_.spp	0	0	0	0	0	0	0	0	0	0	371	0	0	0	0	0	0	0	450	0	0	1464	0	0	0	0	0	0	0	0	0	0	0	0	0	0	0	0	0	0	0	0	0	0	0	5753	0	0
	Anaerotruncus_rubiinfantis	0	0	0	0	0	0	0	0	0	0	0	0	0	170	0	0	0	0	0	0	0	16	0	0	0	0	0	0	0	0	0	0	0	0	0	0	0	0	0	0	0	223	0	0	0	0	93	0
	Harryflintia_acetispora	0	0	0	0	0	0	0	0	0	0	0	0	0	0	0	0	0	0	0	0	0	34	0	0	0	0	0	0	0	0	0	0	0	0	0	0	0	0	0	0	0	419	0	0	0	0	0	0
	Veillonella_A_criceti	0	133	22	0	0	156	1750	0	0	2391	0	88	0	0	0	0	0	0	0	0	0	0	0	0	0	0	0	0	0	0	1020	546	0	0	0	0	0	0	0	0	54	0	0	0	88	0	0	0
	Proteus_.spp	0	0	0	0	0	0	0	0	15626	1449	0	0	0	0	0	487	0	0	0	0	0	0	0	0	0	0	0	0	0	0	0	0	0	0	0	0	0	0	0	0	0	0	0	0	0	0	0	0
	UMGS27_.spp	0	0	0	0	0	0	0	0	0	0	0	0	0	0	543	0	0	0	0	0	0	73	0	0	0	0	0	0	0	0	0	0	0	0	0	0	0	0	0	0	0	0	0	0	0	0	0	0
	Streptococcus_infantis_I	1839	0	554	0	240	0	0	0	0	0	0	0	0	0	0	0	0	0	0	0	0	0	0	0	0	0	4648	0	0	0	0	0	0	0	0	0	0	0	0	0	317	0	0	0	0	0	0	0
	Alistipes_shahii	0	0	0	1451	0	0	0	0	0	0	2750	0	17568	52668	0	0	0	0	2671	191	0	240365	0	0	0	0	0	0	0	0	0	0	0	0	0	0	0	29931	1107	0	0	0	0	0	0	9615	25604	0
	Rikenella_microfusus	0	0	0	0	0	0	0	0	0	0	0	0	0	0	0	0	0	0	0	0	0	0	0	0	0	0	0	0	0	2051	0	0	0	0	0	0	0	0	0	0	0	7838	0	0	0	0	0	0
	Staphylococcus_borealis	0	0	957	0	0	0	0	0	0	0	0	0	0	0	0	0	0	0	0	0	0	0	0	0	0	0	3129	0	0	0	0	0	0	0	0	0	0	0	0	0	0	0	0	0	0	0	0	0
	Ruminiclostridium_E	0	0	0	0	0	0	0	0	0	0	0	0	0	0	0	0	0	0	0	0	0	24	0	0	0	0	0	0	0	0	0	0	0	0	0	0	0	0	0	0	0	185	0	0	0	0	0	0
	UMGS1663_.spp	0	0	0	0	0	0	0	0	0	0	0	0	0	155	0	0	0	0	0	0	0	0	0	0	0	0	0	0	0	0	0	0	0	0	0	0	0	0	0	0	0	111	0	0	0	0	0	0
	Proteus_hauseri	0	0	0	0	0	0	0	0	32318	2792	0	0	0	0	0	2872	0	0	0	0	0	0	0	0	0	0	0	0	0	0	0	0	160	0	0	0	0	0	0	0	0	0	0	0	558	0	0	0
	Megamonas_funiformis	0	0	0	0	0	0	0	0	0	0	0	0	0	0	0	0	0	0	0	11095	0	0	7470	0	0	0	0	0	0	0	0	0	0	0	0	0	0	20619	0	0	0	0	0	0	0	0	0	0
	Staphylococcus_felis	35	0	697	0	0	0	0	0	0	0	0	0	0	0	0	0	0	0	0	0	0	0	0	0	0	0	0	0	0	0	0	0	0	0	0	0	0	0	0	0	0	0	0	0	0	0	0	0
	Eubacterium_R	0	0	0	0	0	0	0	0	0	0	0	0	0	7179	0	0	0	0	11488	0	52958	65069	0	0	0	0	0	0	0	0	0	0	0	0	0	0	0	25018	511589	0	0	0	0	0	0	0	0	0
	Blautia_A_massiliensis	0	0	0	0	0	0	0	0	0	0	0	0	0	354	41178	0	0	18753	0	3385	0	10649	988	0	0	0	0	0	0	239823	929	0	0	0	0	0	0	22958	15735	0	64	3494	37167	0	0	0	0	425
	CAG-317_.spp	0	0	0	0	0	0	0	0	0	98	490	0	1679	862	0	3159	0	298	24	442	25	372	2105	0	0	0	0	0	0	353	586	0	434	0	0	0	817	641	444	0	0	410	248	223	0	2850	25	0
	Coprococcus_eutactus_A	0	0	0	0	0	0	0	0	0	0	0	0	0	0	0	0	0	0	1937	0	0	31039	0	0	0	0	0	0	0	0	0	0	0	0	0	0	0	0	0	0	0	0	0	0	0	0	0	0
	Enterococcus_A_malodoratus	0	0	0	0	2434	0	0	0	1186	1326	0	0	0	0	0	663	0	0	0	0	0	0	0	4734	0	0	0	0	8264	0	1471	82	0	0	0	0	544	0	0	0	0	0	0	0	0	0	0	0
	Choladocola_.spp	0	0	0	0	0	0	0	0	0	0	10835	0	0	7331	0	0	0	159	5220	852	471	3093	4779	0	0	0	0	0	0	0	0	0	0	0	0	0	0	3162	4469	0	0	19564	0	0	0	5087	0	131
	Staphylococcus_haemolyticus	0	0	581	0	0	0	0	0	0	0	0	0	0	0	0	0	0	0	0	0	0	0	0	0	0	0	32	0	0	0	0	100	0	0	0	0	0	0	0	0	0	0	0	0	0	0	0	0
	Izhakiella_.spp	55	69	55	0	125	0	0	0	461	0	0	0	0	0	0	278	0	0	0	0	0	0	0	0	264	0	112	28	304	0	140	84	97	488	0	0	0	0	0	182	0	0	0	111	0	0	0	0
	Fusobacterium_pseudoperiodonticum	0	0	939	0	0	0	0	0	0	0	0	0	0	0	0	0	0	0	0	0	0	0	0	0	0	0	0	0	0	0	0	224	0	0	0	0	0	0	0	0	0	0	0	748	957	477	0	0
	UMGS1901_.spp	0	0	0	0	0	0	0	0	0	0	0	0	0	706	0	0	0	0	0	0	0	363	0	0	0	0	0	0	0	0	0	0	0	0	0	0	0	0	0	0	0	0	0	0	0	0	0	0
	CAG-273_.spp	0	0	0	0	0	0	0	0	0	0	0	0	0	0	0	0	0	0	313	0	0	56	0	0	0	0	0	0	0	0	0	0	0	0	0	0	0	1343	0	0	0	3666	0	0	0	0	0	0
	Collinsella_stercoris	0	0	0	0	0	0	0	0	0	0	0	0	0	0	0	122	0	543	0	0	0	0	0	0	0	0	0	0	0	0	0	0	0	0	0	0	0	0	0	0	0	0	0	0	0	0	0	0
	Varibaculum_vaginae	0	0	0	0	0	92	0	0	0	0	0	0	0	0	0	0	0	0	0	0	0	0	0	0	0	0	0	0	0	163	0	0	0	0	0	0	0	0	0	0	0	0	0	0	0	0	0	0
	Blautia_A_schinkii	0	0	0	0	0	0	0	0	0	0	0	0	0	0	554	0	0	373	0	0	0	178	0	0	0	0	0	0	0	5061	88	0	0	0	0	0	0	593	421	0	0	0	789	0	0	0	0	0
	Staphylococcus_succinus	118	0	1782	0	0	0	0	0	0	0	0	0	0	0	0	0	0	0	0	0	0	0	0	0	0	0	0	0	0	0	0	0	0	0	0	0	0	0	0	0	0	0	0	0	0	0	0	0
	Staphylococcus_pasteuri	950	0	3365	0	0	0	0	0	0	0	0	0	0	0	0	0	0	0	0	0	0	0	0	0	0	0	0	0	0	0	0	0	0	0	0	0	0	0	0	0	0	0	0	0	0	0	0	0
	Lactobacillus_ultunensis	0	0	0	0	0	1090	14	0	0	0	0	296	0	0	0	0	0	0	0	0	0	0	0	0	0	0	0	0	0	0	0	2481	0	0	0	0	0	0	0	0	0	0	0	0	764	0	0	0
	Holdemania_massiliensis	0	0	0	0	0	0	0	0	0	0	0	0	0	0	0	0	0	0	0	0	0	0	0	0	0	0	0	0	0	0	0	0	0	0	0	0	0	0	0	0	0	0	0	0	0	825	560	0
	Eubacterium_maltosivorans	0	0	0	6964	0	0	0	11433	0	0	0	0	0	0	0	0	0	0	0	0	0	0	158	0	0	0	0	0	0	0	0	0	0	0	0	0	3281	0	0	0	0	0	0	0	0	0	0	0
	Butyricimonas_.spp	0	0	0	0	0	0	0	0	0	0	0	0	0	0	0	0	0	4141	0	0	0	356	0	0	0	0	0	0	0	0	0	0	0	0	0	0	0	0	0	0	0	0	0	0	0	0	0	0
	Bifidobacterium_dentium	0	3366	0	3430	36	1012	0	0	14167	20476	0	0	1398	0	2119	11429	35	2312	0	0	2774	0	0	854	32106	2471	107	106	143	285	319	175	0	0	0	0	36	759	359	0	5327	0	983	1500	3633	0	500	0
	Rouxiella_badensis	410	0	0	0	0	204	0	0	204	0	0	0	0	0	0	204	0	0	0	0	0	0	0	0	0	0	0	0	2165	0	0	0	0	287	0	0	0	0	0	0	0	0	0	0	0	0	0	0
	Haemophilus_A_paraphrohaemolyticus	0	14397	0	0	0	0	0	0	0	0	0	3097	0	0	0	0	0	0	0	76	0	0	0	0	0	0	0	0	0	0	0	0	5313	0	0	2716	0	0	0	394	0	0	0	0	0	0	0	0
	Shimwellia_blattae	1700	230	0	0	170	610	172	0	798	132	0	0	114	0	0	502	38	0	0	0	0	0	0	0	511	0	304	323	2897	0	249	190	381	1278	0	0	0	0	0	76	0	0	0	361	0	0	0	0
	Butyricimonas_virosa	0	0	0	0	0	0	0	0	0	0	0	0	0	3859	0	0	0	1045	0	0	95	0	0	0	0	0	0	0	0	0	0	0	0	0	0	0	0	0	0	0	0	0	0	0	0	0	0	0
	Enterococcus_A_dongliensis	0	0	0	0	841	0	0	0	307	413	0	0	0	0	0	126	0	0	0	0	0	0	0	1470	0	0	0	0	1909	0	516	0	0	0	0	0	0	0	0	0	0	0	0	0	0	0	0	0
	Acidaminococcus_intestini	0	0	0	0	0	0	0	0	0	0	0	0	0	0	0	0	84663	0	0	0	0	0	0	0	0	0	0	0	0	0	266739	0	0	0	0	0	0	0	0	0	0	0	0	0	0	0	0	0
	Odoribacter_massiliensis	0	0	0	0	0	0	0	0	0	0	0	0	0	0	461	0	0	0	0	0	0	687	0	0	0	0	0	0	0	0	0	0	0	0	0	0	0	0	0	1500	0	0	0	0	0	0	0	0
	Akkermansia_muciniphila_E	0	0	0	0	0	0	0	0	0	0	0	0	505	0	0	0	86072	0	0	0	0	0	2443	0	0	0	0	0	0	23864	0	0	22813	0	0	0	0	0	0	159	0	0	0	0	0	158	0	0
	Oliverpabstia_intestinalis	0	0	0	0	0	0	0	0	0	0	1514	0	0	1739	0	0	0	0	33	0	0	0	0	0	0	0	0	0	0	0	0	0	0	0	0	0	0	7372	161	0	0	6038	0	0	0	0	0	0
	Anaerococcus_obesiensis	0	0	0	0	0	981	0	0	155	0	0	0	0	0	0	0	0	0	0	0	0	0	0	0	0	0	0	0	0	0	0	0	0	0	0	0	0	0	0	0	0	0	0	0	0	0	0	0
	Agathobacter_rectalis	0	0	0	0	0	0	0	0	57573	0	185616	0	257369	157728	32496	94677	6659	33792	15514	144801	31814	67092	481499	0	0	0	0	0	0	14857	32	0	0	0	0	116509	0	19342	163625	0	0	12555	0	0	0	0	0	44121
	Pauljensenia_turicensis	0	0	0	0	0	2405	0	0	853	0	0	0	0	0	0	0	0	0	0	0	0	0	0	0	0	0	0	0	0	0	0	0	0	0	0	0	0	0	0	0	0	0	0	0	0	0	0	0
	Jejubacter_.spp	1054	304	330	0	167	254	726	0	1542	165	0	114	167	0	0	755	283	84	0	0	0	0	0	49	733	0	576	422	2714	0	523	537	947	1727	0	184	0	0	0	304	0	0	0	807	0	82	0	0
	Clostridium_Q_fessum	0	0	0	0	0	0	0	0	0	0	830	0	4585	5166	0	0	0	0	4817	1241	0	2130	0	0	0	0	0	0	0	0	0	0	0	0	0	51521	0	950	6380	0	7046	3232	0	0	0	0	0	0
	Megamonas_hypermegale	0	0	0	0	0	0	0	0	0	0	0	0	0	0	0	0	0	0	0	104	0	0	0	0	0	0	0	0	0	0	0	0	0	0	0	0	0	529	0	0	0	0	0	0	0	0	0	0
	Aggregatibacter_kilianii	0	0	0	0	0	0	0	0	0	0	0	0	0	0	0	0	0	0	0	0	0	0	0	0	0	0	0	0	0	0	0	0	0	0	0	0	0	0	0	1004	0	0	0	0	0	0	0	0
	Staphylococcus_gallinarum	187	0	1237	0	0	0	0	0	0	0	0	0	0	0	0	0	0	0	0	0	0	0	0	0	0	0	0	0	0	0	0	0	0	0	0	0	0	0	0	0	0	0	0	0	0	0	0	0
	Gemella_massiliensis	311	0	539	0	0	0	0	0	0	0	0	0	0	0	0	0	0	0	0	0	0	0	0	0	0	0	0	0	0	0	0	0	0	0	0	0	0	0	0	0	0	0	0	0	0	0	0	0
	Gemmiger_avistercoris	0	0	0	0	0	0	0	0	0	0	0	0	135	0	0	0	0	55	55	0	0	0	0	0	0	0	0	0	0	0	0	0	0	0	0	0	0	993	188	0	0	1126	0	0	0	108	0	0
	Staphylococcus_schweitzeri	1599	0	32124	0	0	0	0	0	0	0	0	0	0	0	0	0	0	0	0	0	0	0	0	0	0	3198	0	0	0	0	0	0	0	0	0	0	0	0	0	0	0	0	0	0	0	0	0	0
	Alistipes_excrementigallinarum	0	0	0	0	0	0	0	0	0	0	0	0	0	0	0	0	0	0	0	0	0	160	0	0	0	0	0	0	0	0	0	0	0	0	0	0	0	0	0	0	0	0	0	0	0	0	292	0
	PD-1_.spp	0	0	0	0	36	0	0	0	91	0	0	0	0	0	0	73	0	0	0	0	0	0	0	0	128	0	0	0	394	0	0	108	18	164	0	0	0	0	0	0	0	0	0	0	0	0	0	0
	Metalachnospira_.spp	0	0	0	0	0	0	0	0	0	0	0	0	0	1395	0	0	0	0	6125	0	0	55	0	0	0	0	0	0	0	0	0	0	0	0	0	0	0	0	0	0	0	0	0	0	0	0	0	0
	Butyricimonas_faecalis	0	0	0	0	0	0	0	0	0	0	0	0	0	0	0	0	0	52736	0	0	0	6109	0	0	0	0	0	0	0	0	0	0	0	0	0	0	0	0	0	0	0	0	0	0	0	0	0	0
	Bibersteinia_trehalosi	0	122	0	0	0	0	0	0	0	0	0	0	0	0	0	0	0	0	0	0	0	0	0	0	0	0	0	0	0	0	0	0	0	0	0	0	0	0	0	0	0	0	0	0	0	0	0	0
	Akkermansia_.spp	0	0	0	0	0	0	0	0	0	0	0	0	0	0	0	0	16473	0	0	0	0	114	0	0	0	0	0	0	0	8235	0	0	6798	0	0	0	0	0	0	228	0	0	0	0	0	287	0	0
	Eubacterium_I_ramulus	0	0	0	0	0	0	0	0	0	0	3790	0	2305	22392	0	0	0	0	1795	3626	3271	3216	3633	0	0	0	0	0	0	0	0	0	0	0	0	0	0	11017	0	0	0	175	0	0	0	0	0	0
	Streptococcus_xiaochunlingii	381	0	1398	0	675	0	193	0	0	0	0	0	0	0	0	0	0	0	0	0	0	0	0	0	0	0	1098	0	0	0	0	0	0	0	0	0	0	0	0	0	0	0	0	4646	0	0	0	0
	Acetatifactor_.spp	0	0	0	0	0	0	0	0	0	0	83118	0	106977	74435	15783	0	0	10612	51462	66518	24	241191	52480	0	0	0	0	0	0	0	0	0	0	0	0	0	0	2774	359	0	0	71967	0	0	0	25991	776525	0
	Merdicola_.spp	0	0	0	0	0	0	0	0	0	0	0	0	0	0	0	0	0	0	0	0	0	348	0	0	0	0	0	0	0	0	0	0	0	0	0	0	0	0	0	0	0	2624	0	0	0	0	0	0
	Erwinia_billingiae	109	0	0	0	0	0	0	0	53	0	0	0	0	0	0	0	0	0	0	0	0	0	0	0	0	0	0	0	760	0	0	0	0	54	0	0	0	0	0	0	0	0	0	0	0	0	0	0
	Staphylococcus_argenteus	3006	0	18719	0	0	0	0	0	0	0	0	0	0	0	0	0	0	0	0	0	0	0	0	0	0	14777	0	0	0	0	0	0	0	0	0	0	0	0	0	0	0	0	0	0	0	0	0	0
	UBA11524_.spp	0	0	0	0	0	0	0	0	0	0	2732	0	0	3556	0	0	0	0	0	0	0	0	0	0	0	0	0	0	0	0	0	0	0	0	0	0	0	0	0	0	0	0	0	0	0	0	0	0
	Alistipes_A_indistinctus	0	0	0	0	0	0	0	0	0	0	0	0	0	0	0	0	0	135371	0	0	0	0	0	0	0	0	0	0	0	0	2002	0	0	0	0	0	0	0	0	0	0	0	3445	0	0	0	0	0
	KLE1615_.spp	0	0	0	0	0	0	0	0	0	0	1270	0	16422	7896	4386	0	0	0	309	3014	0	9675	774	0	0	0	0	0	0	0	0	0	0	0	0	0	0	1737	1628	0	0	33704	0	0	170633	0	0	0
	Kineothrix_alysoides	0	0	0	0	0	0	0	0	0	0	0	0	0	0	0	0	0	0	0	0	0	0	100	0	0	0	0	0	0	0	0	0	0	0	0	0	0	0	0	0	0	0	0	0	0	0	0	0
	CAG-510_.spp	0	0	0	0	0	0	0	0	0	0	917	0	0	0	0	0	0	0	597	0	0	434	502	0	0	0	0	0	0	0	0	0	0	0	0	0	0	0	0	0	0	1042	0	0	0	0	313	0
	Enterococcus_A	0	0	0	0	1164	0	0	0	593	530	0	0	0	0	0	0	0	0	0	0	0	0	0	1783	0	0	0	0	3767	0	468	0	0	0	0	0	75	0	0	0	0	0	0	0	0	0	0	0
	Staphylococcus_arlettae	357	0	1991	0	0	0	0	0	0	0	0	0	0	0	0	0	0	0	0	0	0	0	0	0	0	0	0	0	0	0	0	0	0	0	0	0	0	0	0	0	0	0	0	0	0	0	0	0
	Enteroscipio_.spp	0	0	0	0	0	0	0	0	844	180	0	0	0	0	0	85	86	0	0	0	0	0	0	48	0	0	0	0	0	0	0	0	0	0	0	0	146	0	0	0	0	0	0	0	0	0	0	0
	Klebsiella_variicola	23789	0	0	0	0	4351	0	0	2672	0	0	0	0	0	0	2499	0	0	0	0	0	0	0	0	0	0	0	0	46700	0	0	0	0	2640	0	0	0	0	0	0	0	0	0	0	0	0	0	0
	Klebsiella_terrigena	9861	0	0	0	0	3088	0	0	1343	0	0	0	0	0	0	1683	0	0	0	0	0	0	0	0	0	0	0	0	10952	0	0	0	0	1925	0	0	0	0	0	0	0	0	0	0	0	0	0	0
	Eggerthella_timonensis	0	0	0	0	0	0	0	0	498	0	0	0	0	0	0	0	98	0	0	0	0	0	0	0	0	0	0	0	0	98	0	0	0	0	0	0	0	0	0	0	0	0	0	0	0	0	0	0
	Varibaculum_cambriense_A	0	0	0	0	0	759	0	0	0	1439	0	0	0	0	0	0	0	0	0	0	0	0	0	0	0	0	0	0	0	1389	0	0	0	0	0	0	0	0	0	0	0	0	0	0	0	0	0	0
	Butyricimonas_faecihominis	0	0	0	0	0	0	0	0	0	0	0	0	0	0	0	0	0	0	0	0	0	4182	0	0	0	0	0	0	0	0	0	0	0	0	0	0	0	0	0	0	0	0	0	0	0	0	0	0
	ZJ141_.spp	0	0	0	0	0	0	0	0	331	52	0	0	0	0	0	31	62	0	0	0	0	0	0	0	0	0	0	0	0	0	0	0	0	0	0	0	0	0	0	0	10	0	0	0	0	0	0	0
	Finegoldia_magna_H	0	0	0	0	0	15950	0	0	0	0	0	0	0	0	0	0	0	0	0	0	0	0	0	0	0	0	0	0	0	0	0	0	0	0	0	0	0	0	0	0	0	0	0	0	0	0	0	0
	Kluyvera_georgiana_A	0	0	0	0	0	0	0	0	33803	0	0	0	0	0	0	0	0	0	0	0	0	0	0	0	0	0	0	0	0	0	0	0	417	0	0	0	0	0	0	0	0	0	0	0	0	0	0	0
	Evtepia_gabavorous	0	0	0	0	0	0	0	0	0	0	0	0	0	2266	0	0	0	0	0	0	0	0	0	0	0	0	0	0	0	1797	0	0	0	0	0	0	0	0	0	0	0	2308	0	0	0	4454	7403	0
	Pygmaiobacter_.spp	0	0	0	0	0	0	0	0	0	0	53	0	0	108	0	0	107	94	213	0	0	4269	53	0	0	0	0	0	0	0	0	0	0	0	0	0	775	307	0	0	0	259	0	0	0	1593	1381	0
	Erwinia_beijingensis	63	15	0	0	48	0	0	0	353	47	0	0	0	0	0	112	32	0	0	0	0	0	0	0	192	0	96	0	145	0	48	16	63	242	0	0	0	0	0	48	0	0	0	80	0	0	0	0
	Streptococcus_gallolyticus	0	0	0	0	0	0	0	0	0	0	0	0	0	0	0	0	0	0	0	0	0	0	0	0	3640	0	0	0	0	0	0	0	0	0	0	0	0	0	0	0	0	0	0	0	0	0	0	0
	Enterococcus_D	0	0	0	0	0	0	0	0	0	27	0	0	0	0	0	0	0	0	0	0	0	0	0	81	0	0	0	0	0	0	0	0	0	0	0	0	0	0	0	0	0	0	0	0	0	0	0	0
	Serratia_symbiotica	723	56	0	0	0	360	0	0	1032	110	0	0	0	0	0	582	0	0	0	0	0	0	0	0	330	0	55	55	2861	0	27	245	222	1091	0	0	0	0	0	138	0	0	0	27	0	0	0	0
	Bacteroides_intestinalis	0	0	0	0	0	0	0	0	0	0	1683	0	0	0	0	0	0	0	0	164	0	3522	1550	160	0	0	0	0	0	0	0	0	0	0	0	0	0	0	534	0	0	0	0	0	0	155	0	0
	Cronobacter_condimenti	0	0	0	0	0	0	0	0	0	0	0	0	0	0	0	0	0	0	0	0	0	0	0	0	0	0	0	0	95	0	0	0	0	0	0	0	0	0	0	0	0	0	0	0	0	0	0	0
	Bacteroides_cellulosilyticus	0	0	0	0	0	0	0	0	0	0	2927	0	0	0	0	0	0	0	0	0	0	4997	1032	0	0	0	0	0	0	0	0	0	0	0	0	0	0	286	123	0	0	0	0	0	0	456	285	0
	Staphylococcus_saccharolyticus	2966	0	4094	0	0	0	0	0	0	0	0	0	0	0	0	0	0	0	0	0	0	0	0	0	0	0	0	0	0	0	0	0	0	0	0	0	0	0	0	0	0	0	0	0	0	0	0	0
	Bilophila_.spp	0	0	0	0	0	0	0	0	0	0	2469	0	0	0	0	0	0	0	0	526	0	0	1006	21703	0	0	0	0	0	0	5304	0	0	0	0	0	4122	0	1561	0	0	0	0	0	0	0	0	0
	Lactobacillus_acidophilus	0	0	0	0	0	0	446	0	2295	0	0	82	0	21	0	0	0	0	0	0	0	0	0	0	0	0	0	0	0	0	0	845	0	0	0	0	0	0	0	0	0	0	0	0	29599	0	0	0
	Barnesiella_merdipullorum	0	0	0	0	0	0	0	0	0	0	0	0	0	277	1251	0	0	0	0	0	0	389	0	0	0	0	0	0	0	0	0	0	0	0	0	0	0	0	0	0	0	0	0	0	0	0	0	0
	Gemmiger_variabilis_C	0	0	0	0	0	0	0	0	0	0	0	0	0	0	0	0	0	0	0	0	0	0	0	0	0	0	0	0	0	0	0	0	0	0	0	0	0	500	0	0	0	186	0	0	0	0	0	0
	Berryella_.spp	0	0	0	0	0	0	0	0	365	81	0	0	0	0	0	116	0	0	0	0	0	0	0	32	0	0	0	0	0	16	0	0	0	0	0	0	80	0	0	0	41	0	0	0	0	0	0	0
	Citrobacter_A_sedlakii	1825	3573	2299	82	3424	652	4325	1013	8904	1679	0	877	2151	0	0	3983	1366	552	0	54	0	0	0	18309	7437	0	5325	3771	5078	909	6450	6133	6934	14366	0	1024	589	0	0	4518	136	0	0	6931	500	376	0	0
	Oliverpabstia_faecicola	0	0	0	0	0	0	0	0	0	0	0	0	0	3046	0	0	0	0	0	0	0	0	0	0	0	0	0	0	0	0	0	0	0	0	0	0	0	16506	8464	0	0	224	0	0	0	0	0	0
	Anaerotruncus_massiliensis_A	0	0	0	0	0	0	0	0	0	0	0	0	0	0	0	0	0	0	0	0	0	0	0	0	0	0	0	0	0	0	0	0	0	0	0	0	0	0	0	0	0	62	0	0	0	0	0	0
	UBA3402_.spp	0	0	0	0	0	0	0	0	0	0	1905	0	0	4427	0	0	0	0	0	0	0	0	3060	0	0	0	0	0	0	0	0	0	0	0	0	0	0	0	2721	0	0	4762	0	0	0	0	0	0
	Clostridium_T_intestinale	0	0	0	0	0	0	0	0	0	0	0	0	0	0	0	0	0	0	0	0	0	0	0	0	1624	0	0	0	0	0	0	0	0	0	0	0	0	0	0	0	0	0	0	0	0	0	0	0
	Blautia_coccoides	0	0	0	0	0	0	0	0	0	0	0	0	0	0	0	0	0	0	0	0	0	0	0	0	0	0	0	0	0	0	0	0	0	0	0	0	0	0	0	0	0	0	0	0	0	0	824	0
	Fusobacterium_massiliense	0	0	0	0	0	0	0	0	0	0	0	0	0	0	0	0	0	0	0	0	0	0	0	0	0	0	0	0	0	0	0	0	0	0	0	0	0	0	0	0	0	0	0	0	40	0	0	0
	Desulfovibrio_desulfuricans	0	0	0	0	0	0	0	0	0	0	0	0	0	0	0	0	0	0	0	0	0	0	0	0	0	0	0	0	0	0	0	0	0	0	0	0	0	0	0	0	0	0	0	0	1083	0	0	0
	Staphylococcus_simiae	2152	0	11759	0	0	0	0	0	0	0	0	0	0	0	0	0	0	0	0	0	0	0	0	0	0	727	0	0	0	0	0	0	0	0	0	0	0	0	0	0	0	0	0	0	0	0	0	0
	Bacteroides_caecimuris	0	1369	0	0	0	0	0	0	0	0	4374	0	1643	1089	157	0	0	403	0	2394	0	6335	0	0	0	0	0	0	0	0	0	0	0	0	0	0	147	0	393	80	0	0	0	0	0	674	0	0
	Clostridium_X_cadaveris	0	0	0	0	0	0	0	0	0	0	0	0	0	0	0	0	0	0	0	0	0	0	0	0	1544	0	0	0	0	0	0	0	0	0	0	0	0	0	0	0	0	0	0	0	0	0	0	0
	Butyribacter_intestini	0	0	0	0	0	0	0	0	0	0	0	0	0	0	0	0	0	0	0	0	0	0	0	0	0	0	0	0	0	0	0	0	0	0	0	0	0	0	0	0	0	1526	0	0	0	0	0	0
	Alistipes_stercorigallinarum	0	0	0	0	0	0	0	0	0	0	0	0	0	0	0	0	0	0	0	0	0	0	0	0	0	0	0	0	0	0	0	0	0	0	0	0	0	0	0	0	0	0	0	0	0	144	259	0
	Lactobacillus_kalixensis	0	0	0	0	0	0	0	0	0	0	0	0	0	0	0	0	0	0	0	0	0	0	0	0	0	0	0	0	0	0	0	5044	0	0	0	0	0	0	0	0	0	0	0	0	511	0	0	0
	Pasteurella_canis	0	0	11	0	0	0	0	0	0	0	0	0	0	0	0	0	0	0	0	0	0	0	0	0	0	12	0	0	0	0	0	0	0	0	0	0	0	0	0	0	0	0	0	0	0	0	0	0
	Parabacteroides_timonensis	0	0	0	0	0	0	0	0	0	0	0	0	0	0	0	0	0	0	0	0	0	4031	0	0	0	0	0	0	0	0	0	0	0	0	0	0	0	0	0	0	0	2809	0	0	0	0	0	0
	Staphylococcus_capitis	1270	0	2928	0	0	0	0	0	0	0	0	0	0	0	0	0	0	0	0	0	0	0	0	0	0	0	0	0	0	0	0	0	0	0	0	0	0	0	0	0	0	0	0	0	0	0	0	0
	JAGTTR01_.spp	0	0	0	0	0	0	0	0	0	0	0	0	0	0	0	0	0	0	460	0	0	0	0	0	0	0	0	0	0	0	0	0	0	0	0	0	0	0	0	0	0	1781	0	0	0	0	0	0
	Avimicrobium_faecavium	0	0	0	0	0	0	0	0	0	0	0	0	0	0	0	0	0	0	0	0	0	0	0	0	0	0	0	0	0	0	0	0	0	0	0	0	0	97	0	0	0	0	0	0	0	0	0	0
	Kluyvera_georgiana	0	0	0	0	0	0	0	0	988	0	0	0	0	0	0	0	0	0	0	0	0	0	0	0	0	0	0	0	0	0	0	0	0	0	0	0	0	0	0	0	0	0	0	0	0	0	0	0
	Pseudocitrobacter_.spp	0	0	0	0	0	0	0	0	138	0	0	0	0	0	0	0	0	0	0	0	0	0	0	0	0	0	0	0	0	0	0	0	0	0	0	0	0	0	0	0	0	0	0	0	0	0	0	0
	Serratia_F_odorifera	0	0	0	0	0	0	0	0	0	0	0	0	0	0	0	0	0	0	0	0	0	0	0	0	0	0	0	0	49	0	0	0	0	0	0	0	0	0	0	0	0	0	0	0	0	0	0	0
	Varibaculum_timonense_A	0	0	0	0	0	0	0	0	0	0	0	0	0	0	623	0	0	0	0	0	0	0	0	0	0	0	0	0	0	0	0	0	0	0	0	0	0	0	0	0	0	0	0	0	0	0	0	0
	CAG-603_.spp	0	0	0	0	0	0	0	0	0	0	0	0	0	1092	0	0	0	0	0	0	0	0	133	0	0	0	0	0	0	0	0	0	0	0	0	18	0	0	0	0	0	0	0	0	0	0	0	0
	Klebsiella_ornithinolytica	5835	0	0	0	0	1748	0	0	1067	0	0	0	0	0	0	1186	0	0	0	0	0	0	0	0	0	0	0	0	9713	0	0	0	0	1651	0	0	0	0	0	0	0	0	0	0	0	0	0	0
	Haemophilus_B_ducreyi	0	242	0	0	0	0	0	0	0	0	0	66	0	0	0	0	0	0	0	0	0	0	0	0	0	0	0	0	0	0	0	0	0	0	0	0	0	0	0	0	0	0	0	0	0	0	0	0
	Varibaculum_cambriense_B	0	0	0	0	0	546	0	0	0	0	0	0	0	0	0	0	0	0	0	0	0	0	0	0	0	0	0	0	0	0	0	0	0	0	0	0	0	0	0	0	0	0	0	0	0	0	0	0
	Ruminiclostridium_E_siraeum	0	0	0	0	0	0	0	0	0	0	0	0	0	10469	0	0	0	0	730	0	0	13804	0	0	0	0	0	0	0	0	0	0	0	0	0	0	0	0	0	0	0	21375	0	0	0	0	0	0
	Mediterraneibacter_faecigallinarum	0	0	0	0	0	0	0	0	0	0	0	0	0	0	0	0	0	0	0	0	0	0	0	0	0	0	0	0	0	0	0	0	0	0	0	0	0	0	0	0	0	0	0	0	0	297	0	0
	Sutterella_wadsworthensis_A	0	0	0	0	0	0	0	0	0	0	0	0	0	0	0	0	0	0	0	0	0	0	0	0	0	0	0	0	0	0	0	0	0	0	0	0	0	9321	0	0	0	0	0	0	0	0	0	0
	Clostridium_A_leptum	0	0	0	0	0	0	0	0	0	0	0	0	0	0	0	0	0	0	0	0	0	916	0	0	0	0	0	0	0	0	0	0	0	0	0	0	0	0	0	0	0	0	0	0	0	0	0	0
	Buttiauxella_.spp	154	0	0	0	0	0	0	0	205	0	0	0	0	0	0	25	0	0	0	0	0	0	0	0	0	0	0	0	1171	0	0	0	0	77	0	0	0	0	0	0	0	0	0	0	0	0	0	0
	CAG-217_.spp	0	0	0	0	0	0	0	0	0	0	0	0	0	0	0	0	0	0	0	0	0	1308	0	0	0	0	0	0	0	0	0	0	0	0	0	0	0	3098	0	0	0	0	0	0	0	0	4369	0
	Streptococcus_infantarius	0	0	0	0	0	0	0	0	0	0	0	0	0	0	0	0	0	0	0	0	0	0	0	0	4382	0	0	0	0	0	0	0	0	0	0	0	0	0	0	0	0	0	0	0	0	0	0	0
	Limosilactobacillus_reuteri	0	0	0	0	0	0	0	0	0	0	0	0	0	0	0	0	0	0	0	0	0	0	0	0	0	0	0	0	0	0	0	0	0	0	0	0	0	0	0	0	0	0	0	0	5859	0	0	0
	Pantoea_mediterraneensis	0	0	0	0	0	0	0	0	72	0	0	0	0	0	0	0	0	0	0	0	0	0	0	0	0	0	0	0	127	0	0	0	0	147	0	0	0	0	0	0	0	0	0	0	0	0	0	0
	Barnesiella_viscericola	0	0	0	0	0	0	0	0	0	0	0	0	0	0	348	0	0	0	0	0	0	0	0	0	0	0	0	0	0	0	0	0	0	0	0	0	0	0	0	0	0	0	0	0	0	0	0	0
	Enterobacter_roggenkampii	0	4071	0	0	0	0	0	0	0	0	0	0	0	0	0	0	0	0	0	0	0	0	0	0	0	0	0	0	0	0	0	0	0	0	0	0	0	0	0	0	0	0	0	0	0	7680	0	0
	Staphylococcus_.spp	2147	0	22497	0	0	0	0	0	0	0	0	0	0	0	0	0	0	0	0	0	0	0	0	0	0	0	0	0	0	0	0	0	0	0	0	0	0	0	0	0	0	0	0	0	0	0	0	0
	CAG-269_.spp	0	0	0	0	0	0	0	0	0	0	0	0	0	20451	0	0	0	0	7543	31497	0	73492	0	0	0	0	0	0	0	0	0	0	0	0	0	0	0	0	0	0	0	36612	0	0	0	0	0	0
	Veillonella_A_seminalis	0	0	0	0	0	0	0	0	0	187644	0	0	0	0	0	0	0	0	0	0	0	0	0	0	0	0	0	0	0	0	90668	35549	0	0	0	0	0	0	0	0	0	0	0	0	0	0	0	0
	Granulicatella_.spp	0	2663	0	0	0	0	452	0	0	0	0	0	0	0	0	0	0	0	0	0	0	0	0	0	0	0	369	0	0	0	0	0	0	0	0	0	0	0	0	0	0	0	0	0	0	0	0	0
	Clostridium_Q	0	0	0	0	0	0	0	0	0	0	0	0	0	0	0	0	0	0	0	0	0	0	0	0	0	0	0	0	0	0	0	0	0	0	0	0	0	0	0	0	0	0	0	0	0	3087	0	0
	Staphylococcus_caprae	1179	0	2826	0	0	0	0	0	0	0	0	0	0	0	0	0	0	0	0	0	0	0	0	0	0	0	0	0	0	0	0	0	0	0	0	0	0	0	0	0	0	0	0	0	0	0	0	0
	Marseille-P3160_.spp	0	0	0	0	0	0	0	0	0	0	0	0	0	0	0	0	0	0	0	0	0	87	0	0	0	0	0	0	0	0	0	0	0	0	0	0	0	0	0	0	0	0	0	0	0	0	0	0
	Butyricicoccus_pullicaecorum	0	0	0	0	0	0	0	0	0	0	0	0	0	0	0	0	0	0	0	0	0	0	0	0	0	0	0	0	0	0	0	0	0	0	0	0	0	0	0	0	0	0	0	0	0	477	0	0
	Kluyvera_sichuanensis	0	0	0	0	0	0	0	0	938	0	0	0	0	0	0	0	0	0	0	0	0	0	0	0	0	0	0	0	1396	0	0	0	0	0	0	0	0	0	0	0	0	0	0	0	0	0	0	0
	Clostridium_AP	0	0	0	0	0	0	0	0	0	0	0	0	0	0	0	0	0	0	0	0	0	0	560	0	0	0	0	0	0	0	0	0	0	0	0	0	0	0	0	0	0	0	0	0	0	2992	15959	0
	Bacteroides_timonensis	0	0	0	0	0	0	0	0	0	0	399	0	0	0	0	0	0	0	0	0	0	1121	276	0	0	0	0	0	0	0	0	0	0	0	0	0	0	0	0	0	0	0	0	0	0	0	0	0
	Enterococcus_D_gallinarum	0	0	0	2826	0	0	0	0	0	55846	0	0	0	0	0	0	0	0	0	0	0	0	0	35636	0	0	0	0	0	1410	235	0	0	0	0	0	0	0	0	0	0	0	0	0	287	0	0	0
	Biostraticola_tofi	47	0	0	0	0	0	0	0	77	0	0	0	0	0	0	31	0	0	0	0	0	0	0	0	0	0	0	0	329	0	0	0	0	61	0	0	0	0	0	0	0	0	0	0	0	0	0	0
	Parvibacter_caecicola	0	0	0	0	0	0	0	0	180	0	0	0	0	0	0	63	0	0	0	0	0	0	0	0	0	0	0	0	0	0	0	0	0	0	0	0	0	0	0	0	0	0	0	0	0	0	0	0
	Haemophilus_influenzae	0	1147	996	0	263	0	876	0	0	0	0	1262	0	0	0	0	0	0	0	0	0	0	95	0	0	1110	0	0	0	0	0	0	0	0	0	204	0	0	0	196	0	0	0	0	0	0	0	0
	Morganella_morganii	0	0	0	0	0	0	0	0	0	0	0	0	0	0	0	0	0	0	0	0	0	0	0	0	0	0	0	0	0	0	0	0	0	0	0	0	0	0	0	0	0	0	0	0	0	0	0	0
	Clostridium_sartagoforme_A	363	0	0	0	0	2343	0	656	263	0	0	0	0	0	0	0	0	0	0	0	0	0	0	0	3441	0	0	0	0	976	0	0	117	0	0	0	0	0	0	0	0	0	0	0	0	0	0	0
	Sutterella_.spp	0	338	0	0	0	1981	0	0	0	0	0	0	83	0	0	0	0	743	0	0	0	0	0	0	0	0	0	0	0	0	0	0	0	0	0	492	0	528	0	339	0	0	0	0	0	0	0	0
	Buttiauxella_agrestis	0	0	0	0	0	0	0	0	0	0	0	0	0	0	0	0	0	0	0	0	0	0	0	0	0	0	0	0	150	0	0	0	0	0	0	0	0	0	0	0	0	0	0	0	0	0	0	0
	Varibaculum_massiliense	0	0	0	0	0	130	0	0	0	0	0	0	0	0	0	0	0	0	0	0	0	0	0	0	0	0	0	0	0	0	0	0	0	0	0	0	0	0	0	0	0	0	0	0	0	0	0	0
	Izhakiella_australiensis	40	0	0	0	0	0	0	0	40	0	0	0	0	0	0	0	0	0	0	0	0	0	0	0	0	0	0	0	180	0	0	0	0	0	0	0	0	0	0	0	0	0	0	0	0	0	0	0
	Anaeroglobus_micronuciformis	0	901	0	0	0	848689	0	0	1483	330	0	0	0	0	0	0	0	0	0	0	0	0	0	0	0	0	0	0	0	0	0	0	0	0	0	6732	0	0	0	0	334	0	0	0	51102	0	0	0
	Enterococcus_A_xiangfangensis	0	0	0	0	0	0	0	0	0	0	0	0	0	0	0	0	0	0	0	0	0	0	0	152	0	0	0	0	50	0	0	0	0	0	0	0	0	0	0	0	0	0	0	0	0	0	0	0
	Lactobacillus_crispatus	0	0	0	0	0	0	3991	0	0	0	0	226	0	0	0	0	0	0	0	0	0	0	0	0	0	0	0	0	0	0	0	2274	0	0	219	0	0	0	0	0	0	0	0	0	865	0	0	0
	Extibacter_hylemonae	0	0	0	0	0	0	0	0	0	0	0	0	3618	0	0	0	0	0	0	0	0	10376	323	0	0	0	0	0	0	0	0	0	0	0	0	0	224032	0	0	0	0	0	0	0	0	142	0	0
	Agathobaculum_.spp	0	0	0	0	0	0	0	0	0	0	0	0	71	8445	0	0	0	0	0	0	0	0	115	0	0	0	0	0	0	0	0	0	0	0	0	12126	86	0	24823	0	0	85	0	0	0	7655	801	0
	Phocaeicola_plebeius	0	0	0	0	0	0	0	0	0	0	0	0	0	0	0	0	0	0	0	0	0	0	0	0	0	0	0	0	0	0	0	0	0	0	0	0	0	741	0	0	0	0	0	0	0	0	0	0
	Clostridium_puniceum	0	0	0	0	0	0	0	0	0	0	0	0	0	0	0	0	0	0	0	0	0	0	0	0	2778	0	0	0	0	0	0	0	0	0	0	0	0	0	0	0	0	0	0	0	0	0	0	0
	GCF-002002485_.spp	0	117	0	0	0	0	0	0	0	0	0	0	0	0	0	0	0	0	0	0	0	0	0	0	0	0	0	0	0	0	0	0	0	0	0	0	0	0	0	0	0	0	0	0	0	0	0	0
	Lacticaseibacillus_rhamnosus	0	0	0	7706	0	0	0	1182	19021	0	0	0	0	0	0	0	0	0	0	0	0	0	0	0	0	0	0	0	0	7173	0	0	1585	0	0	0	0	0	0	0	0	0	0	0	48408	0	0	0
	Providencia_sneebia	0	0	0	0	0	0	0	0	397	0	0	0	0	0	0	0	0	0	0	0	0	0	0	0	0	0	0	0	0	0	0	0	0	0	0	0	0	0	0	0	0	0	0	0	0	0	0	0
	Anaerobutyricum_soehngenii	0	0	0	0	0	0	0	0	0	0	7103	0	4678	210	0	0	0	6020	704	0	0	4843	0	0	0	0	0	0	0	0	0	0	0	0	0	0	0	15904	741	0	0	8675	12906	0	0	24958	68713	219
	Haemophilus_seminalis	2576	17305	48776	0	343	0	993	0	0	0	0	23414	859	0	0	0	0	0	0	0	0	0	427	0	0	55337	0	0	0	0	1781	0	0	0	0	6711	0	0	0	449	4693	0	0	96	0	0	0	0
	Phascolarctobacterium_faecium	0	0	0	0	0	0	0	0	0	0	0	0	0	0	0	0	0	0	0	0	0	0	0	0	0	0	0	0	0	0	0	0	0	0	0	0	0	0	0	1923	0	0	0	0	0	0	0	0
	Superficieibacter_.spp	10515	1818	592	0	1252	2737	1577	184	5580	410	0	345	696	0	0	4060	463	384	0	0	0	0	0	300	5676	0	2425	2148	18648	206	2379	2345	2861	6927	0	351	203	0	0	1775	0	0	0	3209	0	37	0	0
	Bariatricus_massiliensis	0	0	0	0	0	0	0	0	0	0	33	0	0	0	0	0	0	0	0	0	0	0	0	0	0	0	0	0	0	0	0	0	0	0	0	0	0	0	0	0	0	0	0	0	0	0	0	0
	Lactobacillus_amylovorus	0	0	0	0	0	0	0	0	0	0	0	0	0	0	0	0	0	0	0	0	0	0	0	0	0	0	0	0	0	0	0	0	0	0	0	0	0	0	0	0	0	0	0	0	22	0	0	0
	Velocimicrobium_ethanolgignens	0	0	0	0	0	0	0	0	0	0	0	0	0	0	0	0	0	0	0	0	0	0	96	0	0	0	0	0	0	0	0	0	0	0	0	0	0	0	0	0	0	0	0	0	0	0	0	0
	Eubacterium_G_ventriosum	0	0	0	0	0	0	0	0	0	0	325	0	0	56118	0	0	0	0	544	0	0	0	0	0	0	0	0	0	0	0	0	0	0	0	0	0	0	0	0	0	0	0	0	0	0	0	0	0
	Proteus_vulgaris_B	0	0	0	0	0	0	0	0	14965	0	0	0	0	0	0	0	0	0	0	0	0	0	0	0	0	0	0	0	0	0	0	0	0	0	0	0	0	0	0	0	0	0	0	0	0	0	0	0
	Citrobacter_B_koseri	3903	15182	9050	898	9473	624	16864	1282	24136	5695	0	4427	8513	0	0	9044	6351	3007	0	1835	0	0	0	2840	19825	0	18811	15604	17965	2795	27189	21761	29037	41592	222	4507	2245	0	851	14909	681	0	0	30841	5519	1493	0	0
	CAG-353_.spp	0	0	0	0	0	0	0	0	0	0	0	0	0	2940	0	0	0	0	8156	0	0	0	0	0	0	0	0	0	0	0	0	0	0	0	0	0	0	0	0	0	0	0	0	0	0	0	0	0
	Pantoea_dispersa	2390	0	0	0	0	1378	0	0	793	0	0	0	0	0	0	634	0	0	0	0	0	0	0	0	317	0	0	0	6175	0	0	0	0	703	0	0	0	0	0	0	0	0	0	0	0	0	0	0
	Anaerotruncus_colihominis	0	0	0	0	0	0	0	0	0	0	3238	0	0	0	2952	0	0	0	0	6320	0	3837	0	0	0	0	0	0	0	10326	0	0	0	0	0	0	0	0	0	0	0	40679	0	0	0	11381	7401	0
	Lacticaseibacillus_chiayiensis	0	0	0	0	0	0	0	0	0	0	0	0	0	0	0	0	0	0	0	0	0	0	0	0	0	0	0	0	0	0	0	0	0	0	0	0	0	0	0	0	0	0	0	0	106	0	0	0
	CAAEEV01_.spp	0	0	0	0	0	0	0	0	471	0	0	0	0	0	0	0	0	0	0	0	0	0	0	0	0	0	0	0	0	0	0	0	0	0	0	0	0	0	0	0	0	0	0	0	0	0	0	0
	Anaerotruncus_colihominis_A	0	0	0	0	0	0	0	0	0	0	0	0	0	0	0	0	0	0	0	0	0	0	0	0	0	0	0	0	0	0	0	0	0	0	0	0	0	0	0	0	0	3836	0	0	0	322	0	0
	Hoaglandella_endobia	0	0	0	0	0	0	0	0	18	0	0	0	0	0	0	0	0	0	0	0	0	0	0	0	0	0	0	0	0	0	0	0	3	0	0	0	0	0	0	0	0	0	0	0	0	0	0	0
	Lactococcus_cremoris	0	0	0	0	0	0	0	0	0	0	0	0	0	0	0	0	0	0	0	0	0	0	0	0	0	0	0	0	0	0	0	0	0	0	0	0	0	4802	0	0	0	0	0	0	0	0	0	0
	Scatosoma_.spp	0	0	0	0	0	0	0	0	0	0	0	0	0	0	0	0	0	0	0	0	0	0	0	0	0	0	0	0	0	0	0	0	0	0	0	0	0	0	0	0	0	0	0	0	0	0	0	0
	Cutibacterium_porci	0	0	0	0	0	0	0	0	0	0	0	0	0	0	0	0	0	0	0	0	0	0	0	0	0	0	0	0	0	0	0	0	0	0	0	0	0	0	0	0	0	0	0	0	0	0	0	0
	Kluyvera_ascorbata_B	2708	0	0	0	0	682	0	0	3439	0	0	0	0	0	0	418	0	0	0	0	0	0	0	0	0	0	0	0	3082	0	0	0	64	323	0	0	0	0	0	0	0	0	0	0	0	0	0	0
	Ventrisoma_faecale	0	0	0	0	0	0	0	0	0	0	0	0	0	0	0	0	0	0	0	0	0	0	0	0	0	0	0	0	0	0	0	0	0	0	0	346	0	0	0	0	0	0	0	0	0	0	0	0
	Lachnospira_multipara_A	0	0	0	0	0	0	0	0	0	0	0	0	0	0	0	0	0	0	0	0	0	0	0	0	0	0	0	0	0	0	0	0	0	0	0	27	0	0	0	0	0	0	0	0	0	0	0	0
	Phascolarctobacterium_.spp	0	0	0	0	0	0	0	0	0	0	0	0	0	0	0	0	0	0	0	0	0	0	0	0	0	0	0	0	0	0	0	0	0	0	0	0	0	0	0	17044	0	0	0	0	0	0	0	0
	Edaphovirga_cremea	0	0	0	0	0	0	0	0	0	0	0	0	0	0	0	0	0	0	0	0	0	0	0	0	0	0	0	0	55	0	0	0	0	0	0	0	0	0	0	0	0	0	0	0	0	0	0	0
	Pasteurella_felis	0	42	0	0	0	0	0	0	0	0	0	10	0	0	0	0	0	0	0	0	0	0	0	0	0	11	0	0	0	0	0	0	0	0	0	0	0	0	0	21	0	0	0	0	0	0	0	0
	Barnesiella_merdigallinarum	0	0	0	0	0	0	0	0	0	0	0	0	0	0	99	0	0	0	0	0	0	0	0	0	0	0	0	0	0	0	0	0	0	0	0	0	0	0	0	0	0	0	0	0	0	0	0	0
	Lactococcus_lactis	0	0	0	0	0	0	0	0	0	0	0	0	0	0	0	0	0	0	0	0	0	0	0	0	0	0	0	0	0	0	0	0	0	0	0	0	0	50146	0	0	0	0	0	0	0	0	0	0
	Blautia_A_wexlerae	0	85050	0	71774	0	0	0	0	0	98498	14771	0	65959	56385	21846	126991	101367	111842	31740	14219	19869	350095	33492	39226	0	0	0	0	0	366	0	0	0	0	0	47569	139479	55129	191423	0	3284	15779	86859	94087	80033	125040	90175	3037
	Lactobacillus_kitasatonis	0	0	0	0	0	0	0	0	0	0	0	0	0	0	0	0	0	0	0	0	0	0	0	0	0	0	0	0	0	0	0	0	0	0	0	0	0	0	0	0	0	0	0	0	428	0	0	0
	Enterobacter_D_kobei_A	0	0	0	0	0	0	0	0	54	0	0	0	0	0	0	0	0	0	0	0	0	0	0	0	0	0	0	0	649	0	0	0	0	0	0	0	0	0	0	0	0	0	0	0	0	0	0	0
	Erwinia_toletana	0	0	0	0	0	0	0	0	0	0	0	0	0	0	0	0	0	0	0	0	0	0	0	0	0	0	0	0	0	0	0	0	0	0	0	0	0	0	0	0	0	0	0	0	0	0	0	0
	Moellerella_wisconsensis	0	0	0	0	0	0	0	0	633	0	0	0	0	0	0	0	0	0	0	0	0	0	0	0	0	0	0	0	0	0	0	0	0	0	0	0	0	0	0	0	0	0	0	0	0	0	0	0
	Dielma_fastidiosa	0	0	0	0	0	0	0	0	0	0	0	0	0	0	0	0	0	0	0	0	0	0	0	0	0	0	0	0	0	0	0	0	0	0	0	0	0	0	0	0	0	0	0	0	0	108	0	0
	Erwinia_iniecta	0	0	0	0	0	0	0	0	58	0	0	0	0	0	0	0	0	0	0	0	0	0	0	0	0	0	0	0	19	0	0	0	0	0	0	0	0	0	0	0	0	0	0	0	0	0	0	0
	Clostridium_P_massiliamazoniense	0	0	0	0	0	0	0	0	0	0	0	0	0	0	0	0	0	0	0	0	0	0	0	0	365	0	0	0	0	0	0	0	0	0	0	0	0	0	0	0	0	0	0	0	0	0	0	0
	UBA4716_.spp	0	0	0	0	0	0	0	0	0	0	0	0	0	0	0	0	0	0	0	0	0	0	0	0	0	0	0	0	0	0	0	0	0	0	0	29	0	0	0	0	0	0	0	0	0	0	0	0
	Eggerthella_.spp	0	0	0	0	0	0	0	0	1381	399	0	0	0	0	0	0	81	0	0	0	0	0	0	82	0	0	0	0	0	0	0	0	0	0	0	0	0	0	0	0	0	0	0	0	0	0	0	0
	Enterococcus_B_faecium	0	0	0	0	0	0	0	0	0	4500	0	0	0	0	0	0	0	0	0	0	0	0	0	0	0	0	0	0	0	0	0	0	0	0	0	0	0	0	0	0	0	0	0	5755	2043	0	0	0
	Buttiauxella_colo	0	0	0	0	0	0	0	0	257	0	0	0	0	0	0	0	0	0	0	0	0	0	0	0	0	0	0	0	307	0	0	0	0	23	0	0	0	0	0	0	0	0	0	0	0	0	0	0
	Clostridium_tertium	0	0	0	0	0	36687	0	21347	6842	0	0	0	0	0	0	6719	0	0	0	0	0	0	0	0	477	0	0	0	0	10033	0	0	6852	0	0	0	0	0	0	0	0	0	0	0	0	0	0	0
	Niameybacter_stercoravium	0	0	0	0	0	0	0	0	0	0	0	0	0	0	0	0	0	0	0	0	0	0	0	0	0	0	0	0	0	0	0	0	0	0	0	0	0	0	0	0	0	0	0	0	0	0	0	0
	Escherichia_C_alba	365	525	214	0	236	21	685	0	1890	281	0	85	450	0	0	997	84	42	0	0	0	0	0	127	1089	0	514	406	2784	42	762	939	1150	1521	0	192	0	0	0	406	0	0	0	556	21	0	0	0
	Ruminococcus_C_callidus	0	0	0	0	0	0	0	0	0	0	0	0	11603	0	18312	0	0	0	0	0	1106	6494	0	0	0	0	0	0	0	0	0	0	0	0	0	0	0	0	0	0	0	17684	0	0	0	0	0	0
	Enterococcus_C_mediterraneensis	0	0	0	0	0	0	0	0	0	27	0	0	0	0	0	0	0	0	0	0	0	0	0	206	0	0	0	0	0	0	0	0	0	0	0	0	0	0	0	0	0	0	0	0	0	0	0	0
	Parabacteroides_faecis	0	57	0	0	0	0	0	0	0	0	613	0	0	0	0	0	0	0	0	0	0	15455	0	0	0	0	0	0	0	0	0	0	0	0	0	0	0	0	1595	0	0	30229	0	0	0	0	0	0
	Erwinia_rhapontici	0	0	0	0	0	0	0	0	193	0	0	0	0	0	0	37	0	0	0	0	0	0	0	0	0	0	0	0	814	0	0	0	0	0	0	0	0	0	0	0	0	0	0	0	0	0	0	0
	Erwinia_B_gerundensis	344	0	0	0	0	0	0	0	316	0	0	0	0	0	0	24	0	0	0	0	0	0	0	0	122	0	0	0	1653	0	0	0	0	195	0	0	0	0	0	0	0	0	0	0	0	0	0	0
	Campylobacter_A_concisus_T	0	214	263	0	0	0	0	0	0	0	0	0	0	0	0	0	0	0	0	0	0	0	0	0	0	0	0	0	0	0	0	0	0	0	0	0	0	0	0	0	0	0	0	0	0	0	0	0
	MD308_.spp	0	0	0	0	0	0	0	0	0	0	0	0	0	0	0	0	0	0	0	0	0	0	137	0	0	0	0	0	0	0	0	0	0	0	0	0	0	0	0	0	0	0	0	0	0	121	0	0
	Jejubacter_calystegiae	2984	614	166	0	248	655	538	0	1737	124	0	0	371	0	0	863	206	0	0	0	0	0	0	0	867	0	539	598	5168	0	1006	495	1206	1757	0	40	0	0	0	372	0	0	0	745	0	0	0	0
	Erwinia_oleae	0	0	0	0	0	0	0	0	19	0	0	0	0	0	0	0	0	0	0	0	0	0	0	0	0	0	0	0	132	0	0	0	0	19	0	0	0	0	0	0	0	0	0	0	0	0	0	0
	Enteroscipio_rubneri	0	0	0	0	0	0	0	0	1653	215	0	0	0	0	0	37	108	0	0	0	0	0	0	0	0	0	0	0	0	0	0	0	0	0	0	0	223	0	0	0	0	0	0	0	0	0	0	0
	Leminorella_richardii	0	0	0	0	0	0	0	0	0	0	0	0	0	0	0	0	0	0	0	0	0	0	0	0	0	0	0	0	0	0	0	0	0	0	0	0	0	0	0	0	0	0	0	0	0	0	0	0
	Yokenella_regensburgei	10930	1109	318	0	492	3731	1169	0	4389	374	0	86	485	0	0	3320	199	28	0	0	0	0	0	85	1749	0	636	375	15917	0	919	1136	2159	5726	0	282	0	0	0	627	0	0	0	913	0	228	0	0
	Chimaeribacter_.spp	0	0	0	0	0	0	0	0	0	0	0	0	0	0	0	0	0	0	0	0	0	0	0	0	0	0	0	0	0	0	0	0	0	0	0	0	0	0	0	0	0	0	0	0	0	0	0	0
	Lactobacillus_helveticus	0	0	0	0	0	0	0	0	0	0	0	0	0	0	0	0	0	0	0	0	0	0	0	0	0	0	0	0	0	0	0	0	0	0	0	0	0	0	0	0	0	0	0	0	177	0	0	0
	Pseudescherichia_.spp	0	0	0	0	0	0	0	0	0	0	0	0	0	0	0	0	0	0	0	0	0	0	0	0	0	0	0	0	0	0	0	0	0	0	0	0	0	0	0	0	0	0	0	0	0	0	0	0
	Lacticaseibacillus_zeae	0	0	0	0	0	0	0	0	0	0	0	0	0	0	0	0	0	0	0	0	0	0	0	0	0	0	0	0	0	0	0	0	0	0	0	0	0	0	0	0	0	0	0	0	772	0	0	0
	JGM124_.spp	14	363	72	0	174	0	290	0	959	130	0	71	87	0	0	320	42	0	0	0	0	0	0	0	619	0	394	87	668	0	525	359	580	405	0	0	0	0	0	274	0	0	0	217	14	0	0	0
	Veillonella_A	0	617	270	0	0	888	3950	0	0	27326	0	358	0	0	0	0	0	0	0	0	0	0	0	0	0	0	0	0	0	0	12334	5977	0	0	0	11	0	0	0	0	184	0	0	35	125	0	0	0
	Gallibacterium_salpingitidis	0	0	0	0	0	0	0	0	0	0	0	0	0	0	0	0	0	0	0	0	0	0	0	0	0	0	0	0	0	0	0	0	0	0	0	0	0	0	0	0	0	0	0	0	0	0	0	0
	Enterobacter_B_lignolyticus	7556	308	140	0	622	2487	453	0	2786	117	0	70	118	0	0	1901	23	0	0	0	0	0	0	94	1112	0	427	377	12914	0	520	523	1098	2986	0	0	0	0	0	261	0	0	0	574	0	116	0	0
	Enterobacter_soli	0	0	0	0	0	0	0	0	0	0	0	0	0	0	0	0	0	0	0	0	0	0	0	0	0	0	0	0	1130	0	0	0	0	0	0	0	0	0	0	0	0	0	0	0	0	0	0	0
	Lactobacillus_kefiranofaciens	0	0	0	0	0	0	0	0	0	0	0	0	0	0	0	0	0	0	0	0	0	0	0	0	0	0	0	0	0	0	0	353	0	0	0	0	0	0	0	0	0	0	0	0	902	0	0	0
	Lachnospira_multipara	0	0	0	0	0	0	0	0	0	0	0	0	0	0	0	0	0	0	0	0	0	0	0	0	0	0	0	0	0	0	0	0	0	0	0	227	0	0	0	0	0	0	0	0	0	0	0	0
	Nanosynbacter_.spp	0	0	0	0	0	0	0	0	0	0	0	0	0	0	0	0	0	0	0	0	0	0	0	0	0	0	0	0	0	0	0	0	0	0	0	0	0	0	0	0	0	0	0	0	0	0	0	0
	Trabulsiella_odontotermitis_A	0	0	0	0	0	0	0	0	453	0	0	0	0	0	0	332	0	0	0	0	0	0	0	0	123	0	0	0	1627	0	0	0	0	204	0	0	0	0	0	0	0	0	0	0	0	0	0	0
	Cutibacterium_avidum	0	0	0	0	0	0	0	0	0	0	0	0	0	0	0	0	0	0	0	0	0	0	0	0	0	0	0	0	0	0	0	0	0	0	0	0	0	0	0	0	0	0	0	0	0	0	0	0
	Clostridium_disporicum	0	0	0	0	0	0	0	0	0	0	0	0	0	0	0	0	0	0	0	0	0	0	0	0	0	0	0	0	0	0	0	0	0	0	0	0	0	0	0	0	0	0	0	0	0	0	0	0
	Blautia_.spp	0	0	0	1274	0	0	0	0	0	0	0	0	0	0	0	0	0	0	0	0	0	0	0	0	0	0	0	0	0	0	0	0	0	0	0	0	0	0	0	0	0	0	0	0	0	915	862	0
	QVMH01_.spp	0	0	0	0	0	0	0	0	0	0	0	0	0	0	0	0	0	0	0	0	0	0	0	0	0	0	0	0	0	0	0	0	0	0	0	0	0	31	0	0	0	0	0	0	0	0	0	0
	Massiliomicrobiota_merdigallinarum	0	0	0	0	0	0	0	0	0	0	0	0	0	0	0	0	0	0	0	0	0	0	0	0	0	0	0	0	0	0	0	0	0	0	0	0	0	0	0	0	0	0	0	0	0	0	0	0
	CABJAA01_.spp	0	0	0	0	0	0	0	0	0	0	0	0	0	0	0	0	0	0	0	0	0	0	0	0	0	0	0	0	0	0	0	0	0	0	0	0	0	0	0	0	0	0	0	0	0	0	0	0
	Bifidobacterium_criceti	0	0	0	0	0	0	0	0	0	0	0	0	0	0	0	0	0	0	0	0	0	0	0	0	0	0	0	0	0	0	0	0	0	0	0	0	0	0	0	0	0	0	0	0	0	0	0	0
	Erwinia_aphidicola	0	0	0	0	0	0	0	0	0	0	0	0	0	0	0	0	0	0	0	0	0	0	0	0	0	0	0	0	33	0	0	0	0	0	0	0	0	0	0	0	0	0	0	0	0	0	0	0
	Escherichia_.spp	0	0	0	0	0	0	0	0	169	0	0	0	0	0	0	0	0	0	0	0	0	0	0	0	0	0	0	0	0	0	0	0	0	0	0	0	0	0	0	0	0	0	0	0	0	0	0	0
	Enterococcus_faecalis	0	9581	0	0	94785	60099	0	0	18679	0	0	0	512	0	0	0	0	0	0	0	0	0	0	17515	0	0	16169	539	0	0	0	7568	0	0	0	0	0	0	0	0	0	0	0	0	0	0	0	0
	Paraeggerthella_hongkongensis_A	0	0	0	0	0	0	0	0	740	0	0	0	0	0	0	0	0	0	0	0	0	0	0	0	0	0	0	0	0	0	0	0	0	0	0	0	57	0	0	0	0	0	0	0	0	0	0	0
	Citrobacter_A_rodentium	0	1181	889	0	1015	0	798	81	3794	382	0	433	661	0	0	1520	678	247	0	0	0	0	0	444	2243	0	1491	1113	1758	190	2327	1902	2499	5118	0	273	135	0	0	1506	0	0	0	2011	0	0	0	0
	Clostridium_nigeriense	346	0	0	0	0	750	0	0	0	0	0	0	0	0	0	0	0	0	0	0	0	0	0	0	803	0	0	0	0	577	0	0	0	0	0	0	0	0	0	0	0	0	0	0	0	0	0	0
	Dysgonomonas_macrotermitis	0	0	0	0	0	0	0	0	0	0	0	0	0	0	0	0	0	0	0	0	0	0	0	0	0	0	0	0	0	0	0	0	0	0	0	0	0	0	0	0	0	0	0	0	0	0	0	0
	Eisenbergiella_tayi	0	0	0	0	0	0	0	0	0	0	0	0	0	0	28604	0	32746	0	0	0	0	839	0	0	0	0	0	0	0	0	0	0	0	0	0	0	0	0	0	0	0	0	0	0	0	74176	24664	0
	Dysosmobacter_excrementavium	0	0	0	0	0	0	0	0	0	0	0	0	0	0	0	0	0	0	0	0	0	0	0	0	0	0	0	0	0	0	0	0	0	0	0	0	0	0	0	0	0	157	0	0	0	5331	5931	0
	Actinobacillus_C_delphinicola	0	0	0	0	0	0	0	0	0	0	0	0	0	0	0	0	0	0	0	0	0	0	0	0	0	0	0	0	0	0	0	0	0	0	0	0	0	0	0	0	0	0	0	0	0	0	0	0
	Clostridium_septicum	0	0	0	0	0	0	0	0	0	0	0	0	0	0	0	0	0	0	0	0	0	0	0	0	901	0	0	0	0	0	0	0	0	0	0	0	0	0	0	0	0	0	0	0	0	0	0	0
	Clostridium_P_tarantellae	28	0	0	0	0	0	0	0	0	0	0	0	0	0	0	0	0	0	0	0	0	0	0	0	14	0	0	0	0	0	0	0	0	0	0	0	0	0	0	0	0	0	0	0	0	0	0	0
	Dialister_invisus	0	0	0	0	0	0	0	0	0	271	0	0	0	0	0	1599	0	0	0	0	0	0	0	0	0	0	0	0	0	0	0	0	0	0	0	0	0	0	26235	167409	0	17116	0	296	2576	2217	13323	0
	Dickeya_paradisiaca	0	0	0	0	0	0	0	0	0	0	0	0	0	0	0	0	0	0	0	0	0	0	0	0	0	0	0	0	273	0	0	0	0	117	0	0	0	0	0	0	0	0	0	0	0	0	0	0
	Basfia_succiniciproducens	0	21	0	0	0	0	0	0	0	0	0	0	0	0	0	0	0	0	0	0	0	0	0	0	0	0	0	0	0	0	0	0	0	0	0	0	0	0	0	0	0	0	0	0	0	0	0	0
	Salmonella_enterica	0	0	0	0	0	0	0	0	0	0	0	0	0	0	0	0	0	0	0	0	0	0	0	0	0	0	0	0	0	0	0	0	0	0	0	0	0	0	0	0	0	0	0	0	0	0	0	0
	XBD2001_.spp	0	0	0	0	0	0	0	0	0	0	0	0	0	131	0	0	0	0	0	0	0	0	556	0	0	0	0	0	0	0	0	0	0	0	0	0	0	0	0	0	0	72	0	0	0	0	0	0
	Clostridium_AP_scindens	0	0	0	0	0	0	0	0	0	0	0	0	0	0	0	0	5930	0	0	0	0	0	0	0	0	0	0	0	0	0	0	0	0	0	0	0	0	0	0	0	0	0	0	0	0	325	310	0
	Coprobacter_fastidiosus	0	0	0	0	0	0	0	0	0	0	0	0	0	0	0	0	0	0	0	0	0	0	0	0	0	0	0	0	0	0	0	0	0	0	0	0	0	0	0	0	0	0	0	0	0	0	0	0
	Basfia_A_rossii	0	0	0	0	0	0	0	0	0	0	0	0	0	0	0	0	0	0	0	0	0	0	0	0	0	0	0	0	0	0	0	0	0	0	0	0	0	0	0	0	0	0	0	0	0	0	0	0
	ATCC-39006_.spp	0	0	0	0	0	0	0	0	0	0	0	0	0	0	0	0	0	0	0	0	0	0	0	0	0	0	0	0	0	0	0	0	0	0	0	0	0	0	0	0	0	0	0	0	0	0	0	0
	Lachnotalea_.spp	0	0	0	0	0	0	0	0	0	0	0	0	0	0	0	0	0	0	0	0	0	0	0	0	0	0	0	0	0	0	0	0	0	0	0	0	0	0	0	0	0	0	0	0	0	0	0	0
	Massilioclostridium_coli	0	0	0	0	0	0	0	0	0	0	0	0	0	0	0	0	0	0	0	0	0	0	0	0	0	0	0	0	0	0	0	0	0	0	0	0	0	0	0	0	0	0	0	0	0	0	0	0
	Enterocloster_lavalensis	0	0	0	0	0	0	0	0	0	0	0	0	0	0	0	0	0	0	0	0	0	0	0	0	0	0	0	0	0	0	0	0	0	0	0	0	0	0	0	0	0	0	0	0	0	0	0	0
	Mesocricetibacter_.spp	0	65	0	0	0	0	0	0	0	0	0	65	0	0	0	0	0	0	0	0	0	0	0	0	0	0	0	0	0	0	0	0	0	0	0	0	0	0	0	0	0	0	0	0	0	0	0	0
	Eisenbergiella_porci	0	0	0	0	0	0	0	0	0	0	0	0	0	0	662	0	1297	0	0	0	0	0	0	0	0	0	0	0	0	0	0	0	0	0	0	0	0	0	0	0	0	0	0	0	0	4779	298	0
	Enterococcus_C_songbeiensis	0	0	0	0	0	0	0	0	0	0	0	0	0	0	0	0	0	0	0	0	0	0	0	60	0	0	0	0	0	0	0	0	0	0	0	0	0	0	0	0	0	0	0	0	0	0	0	0
	Falcatimonas_.spp	0	0	0	0	0	0	0	0	0	0	0	0	0	16	0	0	0	0	0	0	0	0	0	0	0	0	0	0	0	0	0	0	0	0	0	0	0	0	0	0	0	0	0	0	0	0	0	0
	Edwardsiella_tarda	0	0	0	0	0	0	0	0	0	0	0	0	0	0	0	0	0	0	0	0	0	0	0	0	0	0	0	0	0	0	0	0	0	0	0	0	0	0	0	0	0	0	0	0	0	0	0	0
	Faecalibacillus_intestinalis	0	0	0	0	0	0	0	0	0	0	0	0	0	6140	7439	0	1929	0	307	0	0	0	0	0	0	0	0	0	0	0	0	0	0	0	0	0	0	2189	5304	0	0	0	0	0	0	0	0	0
	Scatocola_faecipullorum	0	0	0	0	0	0	0	0	0	0	0	0	0	0	0	0	0	0	0	0	0	0	0	0	0	0	0	0	0	0	0	0	0	0	0	0	0	0	0	0	0	0	0	0	0	0	0	0
	Moranella_endobia	0	0	0	0	0	0	0	0	7	0	0	0	0	0	0	0	0	0	0	0	0	0	0	0	0	0	0	0	0	0	0	0	0	0	0	0	0	0	0	0	0	0	0	0	0	0	0	0
	Mediterraneibacter_caccavium	0	0	0	0	0	0	0	0	0	0	0	0	0	0	0	0	0	0	0	0	0	0	0	0	0	0	0	0	0	0	0	0	0	0	0	0	0	0	0	0	0	0	0	0	0	291	0	0
	Ruminococcus_E_bromii_B	0	0	0	0	0	0	0	0	0	0	14394	0	245	22144	0	0	0	0	1586	35656	0	0	0	0	0	0	0	0	0	0	0	0	0	0	0	0	0	74646	94181	0	0	27614	0	0	0	0	12557	0
	Eubacterium_G	0	0	0	0	0	0	0	0	0	0	0	0	0	1786	0	0	0	0	0	0	0	9170	0	0	0	0	0	0	0	0	0	0	0	0	0	0	0	0	0	0	0	255	0	0	0	0	0	0
	Cricetibacter_osteomyelitidis	0	0	0	0	0	0	0	0	0	0	0	0	0	0	0	0	0	0	0	0	0	0	0	0	0	0	0	0	0	0	0	0	0	0	0	0	0	0	0	0	0	0	0	0	0	0	0	0
	Streptococcus_lutetiensis	0	0	0	0	0	0	0	0	0	0	0	0	0	0	0	0	0	0	0	0	0	0	0	0	5661	0	0	0	0	0	0	0	0	0	0	0	0	0	0	0	0	0	0	0	0	0	0	0
	Enterobacter_hormaechei_A	0	0	0	0	0	0	0	0	0	0	0	0	0	0	0	0	0	0	0	0	0	0	0	0	3872	0	0	0	384509	0	0	0	0	0	0	0	0	0	0	0	0	0	0	0	0	0	0	0
	Clostridium_AH_fallax	24	0	0	0	0	0	0	0	0	0	0	0	0	0	0	0	0	0	0	0	0	0	0	0	1124	0	0	0	0	0	0	0	0	0	0	0	0	0	0	0	0	0	0	0	0	0	0	0
	Enterococcus_A_florum	0	0	0	0	0	0	0	0	0	0	0	0	0	0	0	0	0	0	0	0	0	0	0	0	0	0	0	0	0	0	0	0	0	0	0	0	0	0	0	0	0	0	0	0	0	0	0	0
	Avibacterium_paragallinarum	0	139	20	0	0	0	0	0	0	0	0	20	0	0	0	0	0	0	0	0	0	0	0	0	0	0	0	0	0	0	0	0	0	0	0	0	0	0	0	101	0	0	0	0	0	0	0	0
	Coprobacter_secundus	0	0	0	0	0	0	0	0	0	0	0	0	0	0	0	0	0	0	0	0	0	0	0	0	0	0	0	0	0	0	0	0	0	0	0	0	0	0	0	0	0	0	0	0	0	0	0	0
	Alistipes_putredinis	0	0	0	0	0	0	0	0	0	0	2305	0	20462	2900	21627	0	63387	276495	978	25357	0	30473	313	0	0	0	0	0	0	0	0	0	0	0	0	0	23273	5375	0	0	0	0	0	0	0	16926	51951	179
	Clostridium_E_jeddahense	0	0	0	0	0	0	0	0	0	0	0	0	0	0	0	0	0	0	0	0	0	0	0	0	0	0	0	0	0	0	0	0	0	0	0	0	0	0	0	0	0	0	0	0	0	0	0	0
	Pantoea_.spp	0	0	0	0	0	0	0	0	0	0	0	0	0	0	0	0	0	0	0	0	0	0	0	0	0	0	0	0	21	0	0	0	0	0	0	0	0	0	0	0	0	0	0	0	0	0	0	0
	Cedecea_davisae	761	0	0	0	0	256	0	0	1140	0	0	0	0	0	0	500	0	0	0	0	0	0	0	0	620	0	0	0	3183	0	0	125	0	898	0	0	0	0	0	0	0	0	0	0	0	0	0	0
	Scandinavium_.spp	2287	681	395	0	816	455	763	0	3636	247	0	163	145	0	0	1828	249	0	0	0	0	0	0	0	1519	0	965	786	8200	0	1260	793	1322	3657	0	84	0	0	0	433	0	0	0	1487	0	0	0	0
	Turicibacter_.spp	0	0	0	0	0	0	0	0	0	0	0	0	0	0	0	0	0	0	0	0	0	0	0	0	0	0	0	0	0	0	0	0	0	0	0	0	0	0	0	0	0	0	0	0	0	0	0	0
	Lelliottia_amnigena_A	4723	3119	1679	0	2712	1109	3186	227	6693	610	0	805	1501	0	0	3806	544	337	0	0	0	0	0	490	5987	0	3315	2336	26196	345	5056	2581	6351	8046	0	575	190	0	0	1821	0	0	0	3639	376	677	0	0
	Clostridium_E_merdae	0	0	0	0	0	0	0	0	0	0	0	0	0	0	0	0	0	0	0	0	0	0	0	0	0	0	0	0	0	0	0	0	0	0	0	0	0	0	0	0	0	0	0	0	0	0	0	0
	Acerihabitans_arboris	0	0	0	0	0	0	0	0	0	0	0	0	0	0	0	0	0	0	0	0	0	0	0	0	0	0	0	0	0	0	0	0	0	0	0	0	0	0	0	0	0	0	0	0	0	0	0	0
	Tatumella_saanichensis	0	0	0	0	0	0	0	0	98	0	0	0	0	0	0	0	0	0	0	0	0	0	0	0	70	0	0	0	139	0	0	0	0	111	0	0	0	0	0	0	0	0	0	0	0	0	0	0
	Lachnoclostridium_A_edouardi	0	0	0	0	0	0	0	0	0	0	0	0	0	0	0	0	0	0	0	0	0	0	0	0	0	0	0	0	0	0	0	0	0	0	0	0	0	0	0	0	0	0	0	0	0	0	0	0
	Amedibacterium_intestinale	0	0	0	0	0	0	0	0	0	0	0	0	0	0	0	0	0	0	0	0	0	0	0	0	0	0	0	0	0	0	0	0	0	0	0	0	0	0	0	0	0	0	0	0	0	0	0	0
	Acerihabitans_.spp	0	0	0	0	0	0	0	0	0	0	0	0	0	0	0	0	0	0	0	0	0	0	0	0	0	0	0	0	40	0	0	0	0	0	0	0	0	0	0	0	0	0	0	0	0	0	0	0
	Rodentibacter_heylii	0	0	0	0	0	0	0	0	0	0	0	0	0	0	0	0	0	0	0	0	0	0	0	0	0	0	0	0	0	0	0	0	0	0	0	0	0	0	0	0	0	0	0	0	0	0	0	0
	Butyricicoccus_pullicaecorum_C	0	0	0	0	0	0	0	0	0	0	0	0	0	0	0	0	0	0	0	0	0	0	0	0	0	0	0	0	0	0	0	0	0	0	0	0	0	0	0	0	0	0	0	0	0	0	0	0
	Enterobacter_A_timonensis	5314	418	22	0	200	2066	439	0	2409	154	0	109	175	0	0	1369	109	0	0	0	0	0	0	0	1776	0	533	485	20275	66	807	574	900	2649	0	109	43	0	0	531	0	0	0	702	22	282	0	0
	Pasteurella_multocida_A	0	0	0	0	0	0	0	0	0	0	0	0	0	0	0	0	0	0	0	0	0	0	0	0	0	0	0	0	0	0	0	0	0	0	0	0	0	0	0	0	0	0	0	0	0	0	0	0
	Erwinia_endophytica	0	0	0	0	0	0	0	0	33	0	0	0	0	0	0	0	0	0	0	0	0	0	0	0	0	0	0	0	16	0	0	0	0	0	0	0	0	0	0	0	0	0	0	0	0	0	0	0
	Massilistercora_timonensis	0	0	0	0	0	0	0	0	0	0	0	0	0	0	0	0	0	0	0	0	0	0	0	0	0	0	0	0	0	0	0	0	0	0	0	0	69	0	0	0	0	0	0	0	0	0	0	0
	Pantoea_stewartii	0	0	0	0	0	0	0	0	0	0	0	0	0	0	0	0	0	0	0	0	0	0	0	0	0	0	0	0	120	0	0	0	0	0	0	0	0	0	0	0	0	0	0	0	0	0	0	0
	Klebsiella_.spp	27730	0	0	0	0	8974	0	0	3046	0	0	0	0	0	0	2668	0	0	0	0	0	0	0	0	774	0	0	0	23854	0	0	0	0	2339	0	0	0	0	0	0	0	0	0	0	0	0	0	0
	Clostridium_E	0	0	0	0	0	0	0	0	0	0	0	0	0	0	0	0	0	0	0	0	0	0	0	0	0	0	0	0	0	0	0	0	0	0	0	0	0	0	0	0	0	0	0	0	0	0	0	0
	Kluyvera_.spp	0	0	0	0	0	0	0	0	562	0	0	0	0	0	0	0	0	0	0	0	0	0	0	0	0	0	0	0	0	0	0	0	0	0	0	0	0	0	0	0	0	0	0	0	0	0	0	0
	BIGb0383_.spp	299	0	0	0	0	64	0	0	259	0	0	0	0	0	0	85	0	0	0	0	0	0	0	0	150	0	0	0	1591	0	0	0	0	64	0	0	0	0	0	0	0	0	0	0	0	0	0	0
	Erwinia_tracheiphila	0	0	0	0	0	0	0	0	0	0	0	0	0	0	0	0	0	0	0	0	0	0	0	0	0	0	0	0	0	0	0	0	0	0	0	0	0	0	0	0	0	0	0	0	0	0	0	0
	Pseudoflavonifractor_.spp	0	0	0	0	0	0	0	0	0	0	0	0	0	0	0	0	0	0	0	0	0	0	0	0	0	0	0	0	0	0	0	0	0	0	0	0	98	0	0	0	0	0	0	0	0	0	0	0
	Mixta_calida	0	0	0	0	0	0	0	0	0	0	0	0	0	0	0	0	0	0	0	0	0	0	0	0	0	0	0	0	0	0	0	0	0	0	0	0	0	0	0	0	0	0	0	0	0	0	0	0
	Pseudoflavonifractor_capillosus	0	0	0	0	0	0	0	0	0	125	0	0	0	0	0	0	233	632	0	0	0	84	0	147	483	0	0	0	0	0	0	0	106	0	0	0	525	0	0	237	0	0	0	0	0	281	0	0
	Aggregatibacter_.spp	0	0	0	0	0	0	0	0	0	0	0	0	0	0	0	0	0	0	0	0	0	0	0	0	0	0	0	0	0	0	0	0	0	0	0	0	0	0	0	349	0	0	0	0	0	0	0	0
	Citrobacter_braakii	0	0	0	0	0	0	0	0	1014	0	0	0	0	0	0	0	0	0	0	0	0	0	0	0	0	0	0	0	2775	0	0	0	0	0	0	0	0	0	0	0	0	0	0	0	0	0	0	0
	Bacteroides_E_propionicifaciens	0	0	0	0	0	0	0	0	0	0	0	0	0	0	0	0	0	0	0	0	0	0	0	0	0	0	0	0	0	0	0	0	0	0	0	0	0	71	0	0	0	0	0	0	0	0	0	0
	Erwinia_.spp	464	0	0	0	0	0	0	0	376	0	0	0	0	0	0	139	0	0	0	0	0	0	0	0	0	0	0	0	2167	0	0	0	0	535	0	0	0	0	0	0	0	0	0	0	0	0	0	0
	Adlercreutzia_equolifaciens	0	0	0	0	0	0	0	0	0	0	0	0	0	0	0	0	0	0	0	0	0	0	0	0	0	0	0	0	0	0	0	0	0	0	0	0	0	0	0	0	0	0	0	0	0	0	0	0
	Ruthenibacterium_lactatiformans	0	0	0	10587	0	0	0	0	0	0	0	0	478	2085	0	0	151370	25249	2450	0	0	1474	0	0	0	0	0	0	0	0	0	0	0	0	0	0	510246	7766	2708	15587	0	4749	0	0	0	4320	6177	0
	Fimimorpha_.spp	0	0	0	0	0	0	0	0	0	0	0	0	0	0	0	0	0	0	0	0	0	0	12	0	0	0	0	0	0	0	0	0	0	0	0	0	0	0	0	0	0	0	0	0	0	0	0	0
	Erwinia_psidii	0	0	0	0	0	0	0	0	0	0	0	0	0	0	0	0	0	0	0	0	0	0	0	0	0	0	0	0	0	0	0	0	0	0	0	0	0	0	0	0	0	0	0	0	0	0	0	0
	CHH4-2_.spp	0	0	0	0	0	0	0	0	0	0	0	0	0	0	0	0	0	0	0	0	0	0	0	0	296	0	0	0	0	0	0	0	0	0	0	0	0	0	0	0	0	0	0	0	0	0	0	0
	Enterococcus_B_villorum	0	0	0	0	0	0	0	0	0	0	0	0	0	0	0	0	0	0	0	0	0	0	0	0	0	0	0	0	0	0	0	0	0	0	0	0	0	0	0	0	0	0	0	0	0	0	0	0
	COE1_.spp	0	0	0	0	0	0	0	0	0	0	8658	0	0	9601	0	0	0	0	174496	0	0	2863	0	0	0	0	0	0	0	0	0	0	0	0	0	0	0	0	0	0	0	146549	0	0	0	0	0	0
	UBA2882_.spp	0	0	0	0	0	0	0	0	0	0	15	0	0	0	0	0	0	0	182	0	0	30	91	0	0	0	0	0	0	0	0	0	0	0	0	0	0	0	0	0	0	265	0	0	0	0	0	0
	Kluyvera_ascorbata	3012	0	0	0	0	493	0	0	3089	0	0	0	0	0	0	529	0	0	0	0	0	0	0	0	249	0	0	0	5071	0	0	0	0	1431	0	0	0	0	0	0	0	0	0	0	0	0	0	0
	Parabacteroides_goldsteinii	0	440	0	0	0	0	0	0	0	0	11962	0	1173	0	0	0	0	0	0	0	0	142288	0	0	0	0	0	0	0	0	0	0	0	365	0	0	0	0	22364	0	0	418130	0	0	0	734	430	0
	Enterobacillus_tribolii	0	0	0	0	0	0	0	0	0	0	0	0	0	0	0	0	0	0	0	0	0	0	0	0	0	0	0	0	109	0	0	0	0	36	0	0	0	0	0	0	0	0	0	0	0	0	0	0
	Oliverpabstia_.spp	0	0	0	0	0	0	0	0	0	0	0	0	0	0	0	0	0	0	0	0	0	0	0	0	0	0	0	0	0	0	0	0	0	0	0	0	0	0	0	0	0	0	0	0	0	0	0	0
	Gordonibacter_pamelaeae	0	0	0	0	0	0	0	0	0	0	0	0	0	0	0	0	0	0	0	0	0	0	0	1668	0	0	0	0	0	0	0	0	0	0	0	0	0	0	0	0	0	0	0	0	0	0	0	0
	Robinsoniella_peoriensis	0	0	0	0	0	0	0	0	0	0	0	0	0	0	0	0	0	0	0	0	0	0	0	0	0	0	0	0	0	0	0	0	0	0	0	0	0	0	0	0	0	0	0	0	0	0	0	0
	Blautia_hominis	0	0	0	0	0	0	0	0	0	0	0	0	0	0	0	0	0	0	0	0	0	0	0	0	0	0	0	0	0	0	0	0	0	0	0	0	0	0	0	0	0	0	0	0	0	0	0	0
	Citrobacter_A_telavivensis	0	219	72	0	441	0	290	0	2729	0	0	0	72	0	0	724	0	0	0	0	0	0	0	1100	1303	0	660	293	4223	0	290	874	510	2986	0	0	0	0	0	364	0	0	0	657	0	0	0	0
	Enterobacter_cloacae_M	0	0	0	0	0	0	0	0	0	0	0	0	0	0	0	0	0	0	0	0	0	0	0	0	0	0	0	0	0	0	0	0	0	0	0	0	0	0	0	0	0	0	0	0	0	0	0	0
	Dysosmobacter_welbionis	0	0	0	0	0	0	0	0	0	0	0	0	0	0	0	0	0	0	0	1575	0	0	0	6882	0	0	0	0	0	0	0	0	0	0	0	0	0	0	0	0	0	14183	0	0	0	103003	110164	0
	Enterococcus_F	0	0	0	0	0	0	0	0	0	0	0	0	0	0	0	0	0	0	0	0	0	0	0	0	0	0	0	0	0	0	0	0	0	0	0	0	0	0	0	0	0	0	0	0	0	0	0	0
	Erwinia_A_teleogrylli	295	0	0	0	0	63	0	0	194	0	0	0	0	0	0	63	0	0	0	0	0	0	0	0	410	0	106	0	826	0	42	0	107	452	0	0	0	0	0	0	0	0	0	0	0	0	0	0
	Clostridium_vincentii	0	0	0	0	0	28	0	0	0	0	0	0	0	0	0	0	0	0	0	0	0	0	0	0	8069	0	0	0	0	0	0	0	0	0	0	0	0	0	0	0	0	0	0	0	0	0	0	0
	Blautia_A	0	12036	0	7358	0	0	0	0	0	14248	44610	0	16964	28080	9525	19570	13588	21306	8942	5221	507	70602	8576	4173	0	0	0	0	0	28877	25233	0	0	0	0	14915	22693	15572	50873	0	0	82844	22125	10120	11544	20262	12520	0
	Clostridium_E_minihomine	0	0	0	0	0	0	0	0	0	0	0	0	0	0	0	0	0	0	0	0	0	0	0	0	0	0	0	0	0	0	0	0	0	0	0	0	0	0	0	0	0	0	0	0	0	0	0	0
	Yersinia_ruckeri	0	0	0	0	0	0	0	0	67	0	0	0	0	0	0	0	0	0	0	0	0	0	0	0	0	0	0	0	0	0	0	0	33	115	0	0	0	0	0	0	0	0	0	0	0	0	0	0
	Hungatella_A_hathewayi_A	0	0	0	0	0	0	0	0	0	0	0	0	0	0	0	0	0	0	0	0	0	0	0	0	74	0	0	0	0	0	0	0	0	0	0	0	0	0	0	0	0	0	0	0	0	0	0	0
	Clostridium_R_vitabionis	0	0	0	0	0	0	0	0	0	0	0	0	0	0	0	0	0	0	0	0	0	0	0	0	0	0	0	0	0	0	0	0	0	0	0	149	0	0	0	0	0	0	0	0	0	0	0	0
	Aggregatibacter_segnis_A	0	0	0	0	0	0	0	0	0	0	0	0	0	0	0	0	0	0	0	0	0	0	0	0	0	0	0	0	0	0	0	0	0	0	0	0	0	0	0	1295	0	0	0	0	0	0	0	0
	Bacteroides_thetaiotaomicron	0	123594	0	1839030	0	0	0	0	0	0	145143	0	353231	95519	638521	0	133	26358	7436	644797	0	335758	21495	73061	0	0	0	0	0	0	0	0	0	3326	318	0	1465219	1103258	225471	446255	0	1442	0	0	0	171839	87719	0
	Gibbsiella_quercinecans	0	0	0	0	0	0	0	0	0	0	0	0	0	0	0	0	0	0	0	0	0	0	0	0	0	0	0	0	103	0	0	0	0	0	0	0	0	0	0	0	0	0	0	0	0	0	0	0
	Lacticaseibacillus_paracasei	0	0	0	0	0	0	0	0	0	0	0	0	0	0	0	0	0	0	0	0	0	0	0	0	0	0	0	0	0	0	0	0	0	0	0	0	0	0	0	0	0	0	0	0	92	0	0	0
	Lawsonibacter_asaccharolyticus	0	0	0	0	0	0	0	0	0	0	0	0	0	0	0	0	0	0	0	0	0	0	0	0	0	0	0	0	0	0	0	0	0	0	0	0	0	0	0	0	0	376	0	0	0	960	33	0
	Bilifractor_.spp	0	0	0	0	0	0	0	0	0	0	0	0	0	0	0	0	0	0	0	0	0	0	0	0	0	0	0	0	0	0	0	0	0	0	0	0	0	0	0	0	0	0	0	0	0	0	0	0
	Clostridium_saccharoperbutylacetonicum	0	0	0	0	0	0	0	0	0	0	0	0	0	0	0	0	0	0	0	0	0	0	0	0	8426	0	0	0	0	0	0	0	0	0	0	0	0	0	0	0	0	0	0	0	0	0	0	0
	Superficieibacter_electus	0	302	137	0	357	0	193	0	1966	110	0	82	82	0	0	493	193	0	0	0	0	0	0	0	906	0	357	388	1206	0	385	816	359	1255	0	0	0	0	0	412	0	0	0	973	0	0	0	0
	Dysosmobacter_avistercoris	0	0	0	0	0	0	0	0	0	0	0	0	0	0	0	0	0	0	0	0	0	0	0	0	0	0	0	0	0	0	0	0	0	0	0	0	0	0	0	0	0	201	0	0	0	3164	3138	0
	GCF-000287335_.spp	0	0	0	0	0	0	0	0	0	0	0	0	0	0	0	0	0	0	0	0	0	0	0	0	0	0	0	0	0	0	0	0	0	0	0	0	0	0	0	0	0	0	0	0	0	0	0	0
	Eubacterium_F	0	0	0	0	0	0	0	0	0	0	0	0	0	24601	0	0	0	0	0	0	0	34339	0	0	0	0	0	0	0	0	0	0	0	0	0	0	0	1420	0	0	0	59445	0	0	0	0	0	0
	Adlercreutzia_celatus_A	0	0	0	0	0	0	0	0	0	0	0	0	0	0	0	0	0	0	0	0	0	0	0	0	0	0	0	0	0	0	0	0	0	0	0	0	0	0	0	0	0	0	0	0	0	0	0	0
	Phytobacter_diazotrophicus	0	0	0	0	0	0	0	0	0	0	0	0	0	0	0	0	0	0	0	0	0	0	0	0	0	0	0	0	0	0	0	0	0	0	0	0	0	0	0	0	0	0	0	0	0	0	0	0
	Enterocloster_.spp	0	39303	0	0	0	0	0	26708	0	20862	552	44780	31235	2853	0	32400	7052	18944	257	5823	8172	0	20250	23404	0	0	0	0	0	195599	32537	0	0	0	0	131971	8065	10334	20160	5916	53178	4141	6241	29677	38136	67193	759	0
	Blautia_ornithocaccae	0	0	0	0	0	0	0	0	0	0	0	0	0	0	0	0	0	0	0	0	0	0	0	0	0	0	0	0	0	0	0	0	0	0	0	0	0	0	0	0	0	0	0	0	0	0	0	0
	Merdimonas_faecis	0	0	0	0	0	0	0	0	0	0	0	0	0	0	0	0	0	0	0	0	0	0	179	0	0	0	0	0	0	0	0	0	0	0	0	0	0	0	0	0	0	0	0	0	0	36	0	0
	Hungatella_.spp	0	0	0	2697	0	0	0	0	0	15637	0	0	0	0	0	0	0	0	0	0	0	0	0	0	3726679	0	0	0	0	0	0	0	0	0	0	97856	3940	0	0	6131	0	7634	0	0	4927	0	0	0
	Veillonella_A_magna	0	0	0	0	0	0	0	0	0	0	0	0	0	0	0	0	0	0	0	0	0	0	0	0	0	0	0	0	0	0	0	0	0	0	0	0	0	0	0	0	0	0	0	0	0	0	0	0
	Citrobacter_A_amalonaticus_E	0	0	0	0	0	0	0	0	0	0	0	0	0	0	0	0	0	0	0	0	0	0	0	0	0	0	0	0	0	0	0	0	0	0	0	0	0	0	0	0	0	0	0	0	0	0	0	0
	DSM-108975_.spp	0	0	0	0	0	0	0	0	0	0	0	0	169	0	136	0	0	544	0	207	0	539	0	0	0	0	0	0	0	0	0	0	0	0	0	0	0	655	0	0	0	0	0	0	0	613	1157	0
	Paraprevotella_stercorigallinarum	0	0	0	0	0	0	0	0	0	0	0	0	0	0	0	0	0	0	0	0	0	0	0	0	0	0	0	0	0	0	0	0	0	0	0	0	0	234	0	57	0	0	0	0	0	0	0	0
	Alistipes_.spp	0	0	0	0	0	0	0	0	0	0	2000	0	17686	11478	80129	0	0	3003	7219	362563	0	406562	12258	0	0	0	0	0	0	0	0	0	0	0	0	0	0	289557	14530	0	0	0	0	0	0	329880	1120962	0
	Gallibacterium_.spp	0	0	0	0	0	0	0	0	0	0	0	0	0	0	0	0	0	0	0	0	0	0	0	0	0	0	0	0	0	0	0	0	0	0	0	0	0	0	0	0	0	0	0	0	0	0	0	0
	Collinsella_intestinalis	0	0	0	0	0	0	0	0	0	0	0	0	0	0	0	0	0	0	0	0	0	0	0	0	0	0	0	0	0	0	0	0	0	0	0	0	0	0	0	0	0	0	0	0	0	0	0	0
	Roseburia_hominis	0	0	0	0	0	0	0	0	0	0	31447	0	49932	5914	4174	0	0	0	2581	93053	8869	11117	216433	0	0	0	0	0	0	0	0	0	0	0	0	444544	0	1986	8321	24355	0	14625	0	0	0	0	0	0
	Parabacteroides_merdae	0	99600	0	0	0	0	0	0	0	0	0	0	108723	45875	0	0	0	0	0	0	0	0	0	0	0	0	0	0	0	0	0	0	0	0	0	0	0	0	0	0	0	0	0	0	0	0	0	0
	Izhakiella_capsodis	0	0	0	0	0	0	0	0	171	0	0	0	0	0	0	0	0	0	0	0	0	0	0	0	28	0	0	0	14	0	0	0	0	100	0	0	0	0	0	0	0	0	0	0	0	0	0	0
	Rubneribacter_badeniensis	0	0	0	0	0	0	0	0	4669	812	0	0	0	0	0	263	595	0	0	0	0	0	0	522	0	0	0	0	0	448	0	0	0	0	0	0	1385	0	0	0	0	0	0	0	270	0	0	0
	Rouxiella_aceris	0	0	0	0	0	0	0	0	19	0	0	0	0	0	0	0	0	0	0	0	0	0	0	0	0	0	0	0	0	0	0	0	0	0	0	0	0	0	0	0	0	0	0	0	0	0	0	0
	Rodentibacter_ratti	0	0	0	0	0	0	0	0	0	0	0	0	0	0	0	0	0	0	0	0	0	0	0	0	0	0	0	0	0	0	0	0	0	0	0	0	0	0	0	104	0	0	0	0	0	0	0	0
	Merdiplasma_excrementigallinarum	0	0	0	0	0	0	0	0	0	0	0	0	0	0	0	0	0	0	0	0	0	0	0	0	0	0	0	0	0	0	0	0	0	0	0	0	0	0	0	0	0	0	0	0	0	0	0	0
	Ewingella_americana	3217	207	0	0	0	967	343	0	2892	0	0	0	0	0	0	1623	0	0	0	0	0	0	0	0	623	0	0	0	13688	0	0	0	69	2245	0	0	0	0	0	0	0	0	0	0	0	0	0	0
	SZZW01_.spp	0	11	0	0	0	0	0	0	185	0	0	0	0	0	0	11	0	0	0	0	0	0	0	0	68	0	0	0	170	0	11	0	0	140	0	0	0	0	0	11	0	0	0	35	0	0	0	0
	Doolittlea_endobia	0	0	0	0	0	0	0	0	34	0	0	0	0	0	0	0	0	0	0	0	0	0	0	0	0	0	0	0	11	0	0	0	0	0	0	0	0	0	0	0	0	0	0	0	0	0	0	0
	Copromonas_avistercoris	0	0	0	0	0	0	0	0	0	0	0	0	0	0	0	553	0	0	0	0	0	0	0	0	0	0	0	0	0	0	0	0	0	0	0	2020	202	0	0	0	0	22	0	0	0	327	0	0
	Ruminococcus_G_avistercoris	0	0	0	0	0	0	0	0	0	0	0	0	0	0	0	0	0	0	0	0	0	0	0	0	0	0	0	0	0	0	0	0	0	0	0	0	0	0	0	0	0	0	0	0	0	0	0	0
	Lawsonibacter_.spp	0	0	0	0	0	0	0	0	0	0	0	0	0	0	0	0	0	0	0	12292	1295	0	0	0	0	0	0	0	0	0	0	0	0	0	0	0	0	14338	0	0	0	0	0	0	0	7997	10809	0
	Enterobacter_cancerogenus	69	0	0	0	0	0	0	0	424	0	0	0	0	0	0	69	0	0	0	0	0	0	0	0	481	0	0	0	18889	0	0	0	0	346	0	0	0	0	0	0	0	0	0	0	0	0	0	0
	Enterococcus_B_ratti	0	0	0	0	0	0	0	0	0	0	0	0	0	0	0	0	0	0	0	0	0	0	0	0	0	0	0	0	0	0	0	0	0	0	0	0	0	0	0	0	0	0	0	0	0	0	0	0
	Haemophilus_haemolyticus	0	0	4861	0	878	0	32535	0	0	0	0	25841	0	0	0	0	0	0	0	0	0	0	619	0	0	0	0	0	0	0	0	0	0	0	0	1719	0	0	0	2034	544	0	0	0	0	0	0	0
	Clostridium_sardiniense	0	0	0	0	0	0	0	0	0	0	0	0	0	0	0	0	0	0	0	0	0	0	0	0	707	0	0	0	0	0	0	0	0	0	0	0	0	0	0	0	0	0	0	0	0	0	0	0
	Siccibacter_colletis	1798	24	0	0	0	814	0	0	722	0	0	0	0	0	0	377	0	0	0	0	0	0	0	0	313	0	0	0	3736	0	0	0	94	1065	0	0	0	0	0	0	0	0	0	0	0	0	0	0
	FD2005_.spp	0	0	0	0	0	0	0	0	0	0	0	0	0	67	0	0	0	0	0	0	0	0	34	0	0	0	0	0	0	0	0	0	0	0	0	0	0	0	0	0	0	0	0	0	0	0	0	0
	Paraeggerthella_hongkongensis	0	0	0	0	0	0	0	0	651	0	0	0	0	0	0	0	0	0	0	0	0	0	0	0	0	0	0	0	0	0	0	0	0	0	0	0	62	0	0	0	0	0	0	0	0	0	0	0
	Klebsiella_grimontii	0	0	0	0	0	0	0	0	0	0	0	0	0	0	0	0	0	0	0	0	0	0	0	0	0	0	0	0	0	0	0	0	0	0	0	0	0	0	0	0	0	0	0	0	0	0	0	0
	Enterococcus_I_lemanii	0	0	0	0	0	0	0	0	0	0	0	0	0	0	0	0	0	0	0	0	0	0	0	0	0	0	0	0	0	0	0	0	0	0	0	0	0	0	0	0	0	0	0	0	0	0	0	0
	Citrobacter_portucalensis	0	0	0	0	0	0	0	0	500	0	0	0	0	0	0	0	0	0	0	0	0	0	0	0	0	0	0	0	1645	0	0	0	0	0	0	0	0	0	0	0	0	0	0	0	0	0	0	0
	Erwinia_mallotivora	0	0	0	0	0	0	0	0	0	0	0	0	0	0	0	0	0	0	0	0	0	0	0	0	0	0	0	0	0	0	0	0	0	0	0	0	0	0	0	0	0	0	0	0	0	0	0	0
	Clostridium_Q_saccharolyticum_A	0	0	0	0	0	0	0	0	0	0	0	0	0	0	0	0	0	0	0	0	0	0	0	0	0	0	0	0	0	0	0	0	0	0	0	0	0	0	0	0	0	0	0	0	0	0	0	0
	Blautia_A_luti	0	2119	0	656	0	0	0	0	0	1674	1336	0	1361	1845	1011	3070	1891	3384	413	100	261	10391	1041	330	0	0	0	0	0	33	0	0	0	0	0	1005	2915	1104	4751	0	0	324	1907	941	1092	2984	1892	0
	CAG-45_.spp	0	0	0	0	0	0	0	0	0	0	0	0	0	0	0	0	0	0	0	0	0	5745	1809	0	0	0	0	0	0	0	0	0	0	0	0	0	0	0	0	0	0	0	0	0	0	0	0	0
	Sutterella_massiliensis	0	131	0	0	0	7040	0	0	0	0	0	0	0	0	0	0	0	0	0	0	0	0	0	0	0	0	0	0	0	0	0	0	0	0	0	769	0	0	0	614	0	0	0	0	0	0	0	0
	Citrobacter_tructae	0	0	0	0	0	0	0	0	401	0	0	0	0	0	0	0	0	0	0	0	0	0	0	0	0	0	0	0	266	0	0	0	0	0	0	0	0	0	0	0	0	0	0	0	0	0	0	0
	Shimwellia_pseudoproteus	3017	201	146	0	534	965	291	0	1687	165	0	0	166	0	0	999	0	0	0	0	0	0	0	0	1396	0	221	184	4913	0	366	421	404	1701	0	0	0	0	0	92	0	0	0	331	0	0	0	0
	Enterococcus_B	0	0	0	0	0	0	0	0	0	0	0	0	0	0	0	0	0	0	0	0	0	0	0	0	0	0	0	0	0	0	0	0	0	0	0	0	0	0	0	0	0	0	0	0	0	0	0	0
	Anaerostipes_hadrus	0	2373	0	0	0	0	0	0	0	0	5468	0	19642	5388	23953	8780	1671	16632	1507	409	2448	1717	63887	0	0	0	0	0	0	6410	0	0	0	0	0	139540	0	70141	42649	0	1459	11202	4505	43838	32551	67272	37233	0
	HGM12998_.spp	0	0	0	0	0	0	0	0	0	0	0	0	0	0	0	0	0	0	0	0	0	0	0	0	0	0	0	0	0	0	0	0	0	0	0	0	0	0	0	0	0	0	0	0	0	0	0	0
	CAJFUR01_.spp	0	0	0	0	0	0	0	0	4665	810	0	0	0	0	0	573	283	0	0	0	0	0	0	441	0	0	0	0	0	606	0	0	0	0	0	0	1145	0	0	0	0	0	0	0	0	0	0	0
	Buttiauxella_davisae_A	62	0	0	0	0	0	0	0	124	0	0	0	0	0	0	20	0	0	0	0	0	0	0	0	0	0	0	0	395	0	0	0	0	62	0	0	0	0	0	0	0	0	0	0	0	0	0	0
	RUG115_.spp	0	0	0	0	0	0	0	0	0	0	29382	0	95264	41110	0	0	0	0	38250	10189	0	1232	561546	0	0	0	0	0	0	0	0	0	0	0	0	194	0	0	3410	0	0	34480	0	0	0	0	0	0
	Kluyvera_cryocrescens	728	0	0	0	0	73	0	0	1862	0	0	0	0	0	0	252	0	0	0	0	0	0	0	0	0	0	0	0	1216	0	0	0	0	397	0	0	0	0	0	0	0	0	0	0	0	0	0	0
	Hafnia_paralvei	0	0	0	0	0	0	0	0	371	0	0	0	0	0	0	0	0	0	0	0	0	0	0	0	0	0	0	0	214	0	0	0	0	0	0	0	0	0	0	0	0	0	0	0	0	0	0	0
	Veillonella_atypica	2143	90986	166113	0	0	154307	564724	0	851	298	6575	330804	0	931	0	1368	0	0	0	989	528	1659	13624	0	0	2388	1965	0	0	0	2259	48748	898	0	0	15165	0	0	5677	974	51927	204	0	8485	47369	51	0	0
	Pantoea_mediterraneensis_A	0	0	0	0	0	0	0	0	155	0	0	0	0	0	0	0	0	0	0	0	0	0	0	0	0	0	0	0	96	0	0	0	19	19	0	0	0	0	0	0	0	0	0	0	0	0	0	0
	Enterobacter_oligotrophicus	0	0	0	0	0	0	0	0	0	0	0	0	0	0	0	0	0	0	0	0	0	0	0	0	434	0	0	0	11099	0	0	0	0	0	0	0	0	0	0	0	0	0	0	0	0	0	0	0
	Kluyvera_cryocrescens_A	0	0	0	0	0	0	0	0	731	0	0	0	0	0	0	0	0	0	0	0	0	0	0	0	0	0	0	0	0	0	0	0	132	79	0	0	0	0	0	0	0	0	0	0	0	0	0	0
	Bacteroides_faecalis	0	1057	0	504	0	0	0	0	0	0	1317	0	3736	608	1239	0	0	0	0	2730	0	3564	44	89	0	0	0	0	0	0	0	0	0	0	0	0	489	1001	1392	2524	0	0	0	0	0	855	345	0
	Blautia_A_caecimuris	0	0	0	0	0	0	0	0	0	0	0	0	0	0	0	0	0	0	0	0	0	0	0	0	0	0	0	0	0	0	0	0	0	0	0	0	0	0	0	0	0	0	0	0	0	0	0	0
	Bacteroides_xylanisolvens	0	30873	0	10854	0	0	0	0	0	0	139953	0	48399	44183	20692	0	0	15085	105094	105614	0	117093	94736	277901	0	0	0	0	0	0	0	0	0	188377	1578	0	25206	28803	62077	1254225	60207	0	0	0	0	8081	2612	4664
	Bifidobacterium_canis	0	209	0	376	0	0	52	0	401	207	0	0	153	0	235	157	0	411	0	0	52	0	0	0	0	0	0	26	0	0	0	0	0	0	0	0	0	0	0	0	308	0	0	0	0	0	0	0
	Clostridium_saccharobutylicum	0	0	0	0	0	0	0	0	0	0	0	0	0	0	0	0	0	0	0	0	0	0	0	0	38703	0	0	0	0	0	0	0	0	0	0	0	0	0	0	0	0	0	0	0	0	0	0	0
	Histophilus_somni	0	296	70	0	0	0	0	0	0	0	0	129	0	0	0	0	0	0	0	0	0	0	0	0	0	82	0	0	0	0	0	0	0	0	0	0	0	0	0	0	0	0	0	0	0	0	0	0
	Enterococcus_D_casseliflavus	0	0	0	0	0	0	0	0	0	0	0	0	0	0	0	0	0	0	0	0	0	0	0	0	0	0	0	0	0	0	0	0	11088	0	0	0	0	0	0	0	0	0	0	0	0	0	0	0
	Ruthenibacterium_.spp	0	0	0	0	0	0	0	0	0	0	0	0	0	0	0	0	4115	419	0	0	0	0	0	0	0	0	0	0	0	0	0	0	0	0	0	0	17017	0	0	0	0	0	0	0	0	0	0	0
	Alistipes_faecigallinarum	0	0	0	0	0	0	0	0	0	0	0	0	566	947	840	0	0	0	68	5431	0	6850	132	0	0	0	0	0	0	0	0	0	0	0	0	0	0	4947	0	0	0	0	0	0	0	7229	21212	0
	UBA2918_.spp	0	0	0	0	0	0	0	0	0	0	189	0	0	0	0	0	0	0	0	145	0	73	0	0	0	0	0	0	0	0	0	0	0	0	0	0	0	403	0	233	0	0	0	0	0	136	0	0
	Peptostreptococcus_russellii	0	0	0	0	0	0	0	0	0	0	0	0	0	0	0	0	0	0	0	0	0	0	0	0	0	0	0	0	0	0	0	0	0	0	0	0	0	0	0	0	0	0	0	0	0	0	0	0
	Pasteurella_oralis	0	0	0	0	0	0	0	0	0	0	0	0	0	0	0	0	0	0	0	0	0	0	0	0	0	0	0	0	0	0	0	0	0	0	0	0	0	0	0	0	0	0	0	0	0	0	0	0
	Alistipes_finegoldii	0	842	0	0	0	0	0	0	0	0	381	0	11094	1680	22087	0	0	223	37507	90122	0	37444	3171	0	0	0	0	0	0	0	0	0	0	0	0	0	0	351910	0	0	0	0	0	0	0	99370	289045	0
	Franconibacter_helveticus	5330	0	0	0	0	902	0	0	1026	0	0	0	0	0	0	808	0	0	0	0	0	0	0	0	312	0	90	0	8845	0	0	267	268	1643	0	0	0	0	0	0	0	0	0	0	0	0	0	0
	Rodentibacter_A_heylii_A	0	292	181	0	10	0	0	0	0	0	0	109	0	0	0	0	0	0	0	0	0	0	0	0	0	40	0	0	0	0	0	0	0	0	0	0	0	0	0	172	0	0	0	0	0	0	0	0
	Mediterraneibacter_caccogallinarum	0	0	0	0	0	0	0	0	0	0	0	0	0	0	0	0	0	0	0	0	0	68	0	0	0	0	0	0	0	0	0	0	0	0	0	0	0	0	0	0	0	0	0	0	0	495	0	0
	Clostridium_chromiireducens	0	0	0	0	0	0	0	0	0	0	0	0	0	0	0	0	0	0	0	0	0	0	0	0	9332	0	0	0	0	0	0	0	0	0	0	0	0	0	0	0	0	0	0	0	0	0	0	0
	Clostridium_uliginosum	0	0	0	0	0	0	0	0	0	0	0	0	0	0	0	0	0	0	0	0	0	0	0	0	10109	0	0	0	0	0	0	0	0	0	0	0	0	0	0	0	0	0	0	0	0	0	0	0
	Atlantibacter_.spp	340	441	83	0	280	27	165	0	1905	197	0	0	110	0	0	964	0	0	0	0	0	0	0	0	799	0	549	414	3288	0	521	363	770	1697	0	0	0	0	0	284	0	0	0	502	0	0	0	0
	Enterobacter_cloacae	610	0	0	0	0	0	0	0	677	0	0	0	0	0	0	332	0	0	0	0	0	0	0	0	12363	0	0	0	37723	0	0	0	0	1201	0	0	0	0	0	0	0	0	0	0	0	594	0	0
	Parabacteroides_B_pacaensis	0	0	0	0	0	0	0	0	0	0	0	0	0	0	0	0	0	0	0	0	0	125	0	0	0	0	0	0	0	0	0	0	0	0	0	0	0	0	0	0	0	0	0	0	0	0	0	0
	Catenibacillus_scindens	0	0	0	0	0	0	0	0	0	0	0	0	0	0	0	0	0	0	0	0	0	0	0	0	0	0	0	0	0	0	0	0	0	0	0	0	0	0	0	0	0	0	0	0	0	0	0	0
	Hydrogeniiclostridium_mannosilyticum	0	0	0	0	0	0	0	0	0	0	0	0	0	0	0	0	0	0	0	0	0	0	0	0	0	0	0	0	0	0	0	0	0	0	0	0	0	0	0	0	0	0	0	0	0	0	0	0
	Ruminococcus_C	0	0	0	0	0	0	0	0	0	0	7275	0	26254	3329	232	0	0	0	0	0	0	0	0	0	0	0	0	0	0	0	0	0	0	0	0	0	0	0	0	0	0	0	0	0	0	0	0	0
	Marseille-P3106_.spp	0	0	0	0	0	0	0	0	0	0	0	0	0	0	0	0	0	283	0	0	0	2095	0	0	239	0	0	0	0	0	0	0	0	0	0	0	310	30	0	29	0	0	0	0	0	251	0	0
	Enterococcus_B_phoeniculicola	0	0	0	0	0	0	0	0	0	0	0	0	0	0	0	0	0	0	0	0	0	0	0	0	0	0	0	0	0	0	0	0	0	0	0	0	0	0	0	0	0	0	0	0	0	0	0	0
	QWKK01_.spp	0	0	0	0	0	0	0	0	1489	126	0	0	0	0	0	0	0	0	0	0	0	0	0	0	0	0	0	0	0	0	0	0	0	0	0	0	0	0	0	0	0	0	0	0	0	0	0	0
	NSJ-51_.spp	0	0	0	562	0	0	0	0	0	766	0	0	0	0	0	0	1370	3371	0	0	0	0	0	1241	4373	0	0	0	0	0	0	0	1562	0	0	0	2369	0	0	1581	0	0	0	0	0	1171	133	0
	Butyribacter_.spp	0	0	0	0	0	0	0	0	0	0	0	0	0	0	0	0	0	0	0	0	0	0	0	0	0	0	0	0	0	0	0	0	0	0	0	0	0	0	0	0	0	0	0	0	0	0	0	0
	Eubacterium_I_ramulus_A	0	0	0	0	0	0	0	0	0	0	0	0	0	644	0	0	0	0	0	0	0	0	0	0	0	0	0	0	0	0	0	0	0	0	0	0	0	206	0	0	0	0	0	0	0	0	0	0
	Alistipes_megaguti	0	0	0	0	0	0	0	0	0	0	0	0	833	1087	653	0	0	0	92	3564	0	13954	0	0	0	0	0	0	0	0	0	0	0	0	0	0	0	8587	0	0	0	0	0	0	0	6255	19805	0
	TWA4_.spp	0	0	0	0	0	0	0	0	0	0	0	0	0	0	0	0	0	0	0	0	0	0	0	0	0	0	0	0	0	0	0	0	0	0	0	0	0	0	0	0	0	0	0	0	0	0	0	0
	Parabacteroides_massiliensis	0	5323	0	0	0	0	0	0	0	0	0	0	6138	1415	0	0	0	0	0	0	0	0	0	0	0	0	0	0	0	0	0	0	0	0	0	0	0	0	0	0	0	0	0	0	0	0	0	0
	Alistipes_communis	0	0	0	0	0	0	0	0	0	0	0	0	649	204	1461	0	0	313	0	6999	0	5517	178	0	0	0	0	0	0	0	0	0	0	0	0	0	0	2124	0	0	0	0	0	0	0	7352	28054	0
	Instestinimonas_A_gabonensis	0	0	0	0	0	0	0	0	0	0	0	0	0	0	0	0	198	358	0	0	0	0	0	0	601	0	0	0	0	0	0	0	195	0	0	0	431	0	0	157	0	0	0	0	0	155	233	0
	Parabacteroides_distasonis	0	65095	0	0	0	0	0	0	0	0	46222	0	17680	39398	78699	0	0	50038	30283	303930	17253	367810	81250	0	0	0	0	0	0	0	0	0	0	3472144	39502	0	0	250965	0	9171	733	0	2100	0	0	0	0	0
	Dorea_B_phocaeensis	0	0	0	0	0	0	0	0	0	0	0	0	208	0	0	393	0	0	0	0	0	0	343	0	0	0	0	0	0	0	0	0	0	0	0	0	0	0	0	0	0	0	0	0	0	384	0	0
	Parasutterella_.spp	0	0	0	0	0	0	0	0	0	0	0	0	0	0	0	0	0	0	0	0	0	0	0	0	0	0	0	0	0	0	0	0	0	0	0	0	0	0	0	0	0	0	0	0	0	0	0	0
	Mediterraneibacter_excrementipullorum	0	0	0	0	0	0	0	0	0	0	0	0	0	0	0	0	0	0	0	0	0	0	0	0	0	0	0	0	0	0	0	0	0	0	0	0	0	0	0	0	0	0	0	0	0	303	0	0
	Flavonifractor_phocaeensis_A	0	0	0	0	0	0	0	0	0	0	0	0	0	0	0	0	0	0	0	0	0	0	0	0	0	0	0	0	0	0	0	0	0	0	0	0	0	0	0	0	0	0	0	0	0	0	0	0
	UBA11774_.spp	0	0	0	0	0	0	0	0	0	0	169	0	0	1431	0	0	0	0	0	0	0	170	4379	0	0	0	0	0	0	0	0	0	0	0	0	0	0	0	0	0	0	4286	0	0	0	0	0	0
	An92_.spp	0	0	0	21	0	0	0	0	0	107	0	0	0	0	0	0	337	610	0	0	0	0	0	104	896	0	0	0	0	0	0	0	124	0	0	0	452	0	0	458	0	0	0	0	0	830	21	0
	Intestinimonas_butyriciproducens	0	0	0	0	0	0	0	0	0	0	546	0	0	74	0	0	0	0	0	0	0	2640	0	0	0	0	0	0	0	0	0	0	0	265	0	0	0	3634	0	0	0	3906	0	0	0	0	0	0
	Longibaculum_muris	0	0	0	0	0	0	0	0	0	0	0	0	0	0	0	0	0	0	0	0	0	0	0	0	0	0	0	0	0	0	0	0	0	0	0	0	0	0	0	0	0	0	0	0	0	0	0	0
	Ruminococcus_D_bicirculans	0	0	0	0	0	0	0	0	0	0	0	0	0	0	0	0	0	0	0	29942	0	8745	0	0	0	0	0	0	0	0	0	0	0	0	0	1264	0	0	0	0	0	157582	0	0	0	0	0	0
	Clostridium_moniliforme	0	0	0	0	0	239	0	0	0	0	0	0	0	0	0	0	0	0	0	0	0	0	0	0	7327	0	0	0	0	0	0	0	610	0	0	0	0	0	0	0	0	0	0	0	0	0	0	0
	Enterobacter_ludwigii	0	0	0	0	0	0	0	0	0	0	0	0	0	0	0	0	0	0	0	0	0	0	0	0	690	0	0	0	20492	0	0	0	0	0	0	0	0	0	0	0	0	0	0	0	0	69	0	0
	Hungatella_effluvii	0	0	0	0	0	0	0	0	0	76269	0	0	0	0	1531	0	167	0	0	0	0	0	0	0	14389	0	0	0	0	0	0	0	0	0	0	54	0	0	0	32148	0	6669	0	0	0	2567	1107	0
	Parabacteroides_johnsonii	0	662	0	0	0	0	0	0	0	0	0	0	747	829	0	0	0	0	0	0	0	0	0	0	0	0	0	0	0	0	0	0	0	0	0	0	0	0	0	0	0	0	0	0	0	0	0	0
	Ruminococcus_D	0	0	0	0	0	0	0	0	0	0	0	0	0	0	0	0	0	0	0	1455	0	0	0	0	0	0	0	0	0	0	0	0	0	0	0	0	0	0	0	0	0	10203	0	0	0	0	0	0
	Muricomes_.spp	0	0	0	0	0	0	0	0	0	0	0	0	0	0	1555	0	464	0	0	0	0	0	0	0	0	0	0	0	0	0	0	0	0	0	0	0	13856	0	357	0	0	0	0	0	0	0	0	0
	Enterococcus_E_cecorum	0	0	0	0	0	0	0	0	0	0	0	0	0	0	0	0	0	0	0	0	0	0	0	0	0	0	0	0	0	0	0	0	0	0	0	0	0	0	0	0	0	0	0	0	0	0	0	0
	Fusobacterium_polymorphum	0	0	0	0	0	0	0	0	0	0	0	0	0	0	0	0	0	0	0	0	0	0	0	0	0	0	0	0	0	0	0	70	0	0	0	0	0	0	0	0	0	0	0	0	0	0	0	0
	Clostridium_P_perfringens	72668	0	0	0	0	6892	0	0	10064	0	0	0	0	0	0	0	0	0	0	0	0	0	0	0	669	0	0	0	0	0	0	4050	0	0	0	0	0	0	0	0	0	0	0	0	0	0	0	0
	Enterococcus_rivorum	0	0	0	0	0	0	0	0	0	0	0	0	0	0	0	0	0	0	0	0	0	0	0	0	0	0	0	0	0	0	0	0	0	0	0	0	0	0	0	0	0	0	0	0	0	0	0	0
	Dysgonomonas_.spp	0	0	0	0	0	0	0	0	0	0	0	0	0	0	86	0	326	0	0	74	0	48	0	0	0	0	0	0	0	0	0	0	0	0	0	0	0	108	0	0	0	0	0	0	0	24	0	0
	Alistipes_excrementavium	0	0	0	0	0	0	0	0	0	0	0	0	733	567	1935	0	0	89	186	15859	0	6583	60	0	0	0	0	0	0	0	0	0	0	0	0	0	0	5276	0	0	0	0	0	0	0	11744	37230	0
	Alistipes_cottocaccae	0	0	0	0	0	0	0	0	0	0	0	0	631	1816	2052	0	0	0	500	7101	0	10452	63	0	0	0	0	0	0	0	0	0	0	0	0	0	0	7188	107	0	0	0	0	0	0	7657	25544	0
	Enterobacter_D	4396	532	27	0	221	923	55	0	2241	55	0	0	138	0	0	1434	27	0	0	0	0	0	0	27	1574	0	333	110	9699	0	641	333	637	2440	0	0	0	0	0	253	0	0	0	196	0	82	0	0
	Bifidobacterium_pseudocatenulatum	577	37898	0	736	1049	741	349	0	4959	2587	0	47	22351	0	14498	1997	2063	29808	1098	1664	35497	1178	1452	473	0	740	661	579	200	873	24	148	115	0	0	2442	903	14758	10831	0	62965	0	2975	750	526	452	774	0
	Ruminococcus_E_bromii_A	0	0	0	0	0	0	0	0	0	0	0	0	0	0	0	0	0	0	0	0	0	0	0	0	0	0	0	0	0	0	0	0	0	0	0	0	0	0	123	0	0	0	0	0	0	0	0	0
	Phytobacter_massiliensis	812	71	0	0	95	305	0	0	1183	0	0	0	0	0	0	854	0	0	0	0	0	0	0	0	431	0	167	72	2802	0	48	142	143	1080	0	0	0	0	0	0	0	0	0	24	0	0	0	0
	Franconibacter_pulveris	160	0	0	0	0	0	0	0	291	0	0	0	0	0	0	352	0	0	0	0	0	0	0	0	129	0	0	0	3057	0	0	0	0	1000	0	0	0	0	0	0	0	0	0	0	0	0	0	0
	Alistipes_merdavium	0	0	0	0	0	0	0	0	0	0	124	0	2212	2222	8538	0	0	277	957	44012	0	20316	1225	0	0	0	0	0	0	0	0	0	0	0	0	0	0	11705	0	0	0	0	0	0	0	34041	114549	0
	Enterobacter_mori	0	0	0	0	0	0	0	0	0	0	0	0	0	0	0	0	0	0	0	0	0	0	0	0	135	0	0	0	25936	0	0	0	0	0	0	0	0	0	0	0	0	0	0	0	0	0	0	0
	Enterococcus_B_hirae	0	0	0	0	0	0	0	0	0	0	0	0	0	0	0	0	0	0	0	0	0	0	0	0	0	0	0	0	0	0	0	0	0	0	0	0	0	0	0	0	0	0	0	0	0	0	0	0
	Bacteroides_fragilis_A	0	101598	0	1535	0	0	0	8437247	0	0	139433	0	71547	1404	86087	0	4378489	28674	69594	203403	0	31824	47198	1089588	0	0	0	0	0	0	859974	0	0	5341	27150	535958	235337	465015	202327	149290	2236	3375246	0	0	0	1076751	319265	0
	Phytobacter_ursingii	0	0	0	0	0	0	0	0	804	0	0	0	0	0	0	0	0	0	0	0	0	0	0	0	0	0	0	0	0	0	0	0	0	0	0	0	0	0	0	0	0	0	0	0	0	0	0	0
	Paralachnospira_avium	0	0	0	0	0	0	0	0	0	0	0	0	0	0	0	0	0	0	0	0	0	0	0	0	0	0	0	0	0	0	0	0	0	0	0	0	0	0	0	0	0	0	0	0	0	0	0	0
	Roseburia_inulinivorans	0	0	0	0	0	0	0	0	0	0	65090	0	192	84410	8187	0	0	0	240960	100487	23688	41513	358318	0	0	0	0	0	0	0	0	0	0	0	0	0	0	46876	33775	0	0	146451	0	0	0	0	0	6706
	Lelliottia_.spp	23	0	0	0	0	0	0	0	114	0	0	0	0	0	0	114	0	0	0	0	0	0	0	0	480	0	0	0	3971	0	0	0	0	254	0	0	0	0	0	0	0	0	0	0	0	0	0	0
	MGBC163490_.spp	0	0	0	0	0	0	0	0	0	0	0	0	0	0	0	0	0	0	0	0	0	0	0	0	0	0	0	0	0	0	0	0	0	0	0	0	0	0	0	0	0	0	0	0	0	0	0	0
	Serratia_H_symbiotica_A	0	0	0	0	0	0	0	0	205	0	0	0	0	0	0	0	0	0	0	0	0	0	0	0	0	0	0	0	185	0	0	0	0	0	0	0	0	0	0	0	0	0	0	0	0	0	0	0
	Enterobacter_wuhouensis	0	0	0	0	0	0	0	0	0	0	0	0	0	0	0	0	0	0	0	0	0	0	0	0	0	0	0	0	3608	0	0	0	0	0	0	0	0	0	0	0	0	0	0	0	0	0	0	0
	Citrobacter_.spp	46	1829	788	0	630	0	1196	0	7921	413	0	45	501	0	0	2088	410	0	0	0	0	0	0	272	2141	0	1617	8803	11608	182	1736	2438	2518	4808	0	227	0	0	0	827	0	0	0	2597	0	0	0	0
	Pluralibacter_gergoviae	54091	750	93	0	1016	16921	416	46	8907	282	0	0	47	0	0	6908	47	0	0	0	0	0	0	608	3448	0	612	328	65475	0	1076	1357	1342	11977	0	0	0	0	0	518	0	0	0	1434	0	368	0	0
	Plesiomonas_shigelloides	460	0	0	0	0	0	0	0	1469	0	0	0	0	0	0	204	0	0	0	0	0	0	0	0	304	0	0	0	3042	0	0	0	50	673	0	0	0	0	0	0	0	0	0	0	0	0	0	0
	Bisgaardia_hudsonensis	0	0	0	0	0	0	0	0	0	0	0	0	0	0	0	0	0	0	0	0	0	0	0	0	0	0	0	0	0	0	0	0	0	0	0	0	0	0	0	0	0	0	0	0	0	0	0	0
	Serratia_G_microhaemolytica	0	0	0	0	0	0	0	0	124	0	0	0	0	0	0	0	0	0	0	0	0	0	0	0	0	0	0	0	0	0	0	0	0	0	0	0	0	0	0	0	0	0	0	0	0	0	0	0
	Klebsiella_indica	3309	0	0	0	0	896	0	0	1031	0	0	0	0	0	0	651	0	0	0	0	0	0	0	0	579	0	0	0	3739	0	0	0	0	906	0	0	0	0	0	0	0	0	0	0	0	0	0	0
	Merdibacter_massiliensis	0	0	0	0	0	0	0	0	0	0	0	0	0	0	0	0	0	0	0	0	0	0	0	0	0	0	0	0	0	0	0	0	0	0	0	0	0	0	0	0	0	0	0	0	0	0	0	0
	Kosakonia_.spp	148	0	0	0	0	0	0	0	765	0	0	0	0	0	0	222	0	0	0	0	0	0	0	0	272	0	0	0	1607	0	0	123	171	445	0	0	0	0	0	73	0	0	0	0	0	0	0	0
	Bacteroides_congonensis	0	7161	0	0	0	0	0	0	0	0	28944	0	14329	4169	5824	0	0	5169	1503	18316	0	31758	14799	36148	0	0	0	0	0	0	0	0	0	360	0	0	4971	1910	7505	18395	0	0	0	0	0	4288	1537	0
	Lelliottia_jeotgali	0	0	0	0	0	0	0	0	312	0	0	0	0	0	0	102	0	0	0	0	0	0	0	0	0	0	0	0	3101	0	0	0	0	0	0	0	0	0	0	0	0	0	0	0	0	0	0	0
	Muricomes_fissicatena_A	0	0	0	0	0	0	0	0	0	0	0	0	0	0	0	0	0	0	0	0	0	0	0	0	0	0	0	0	0	0	0	0	0	0	0	0	1050	0	0	0	0	0	0	0	0	0	0	0
	Siccibacter_turicensis	3229	0	0	0	0	1057	0	0	981	0	0	0	0	0	0	1006	0	0	0	0	0	0	0	0	203	0	0	0	7699	0	0	0	29	1147	0	0	0	0	0	0	0	0	0	0	0	0	0	0
	Caviibacterium_pharyngocola	0	0	0	0	0	0	0	0	0	0	0	0	0	0	0	0	0	0	0	0	0	0	0	0	0	0	0	0	0	0	0	0	0	0	0	0	0	0	0	0	0	0	0	0	0	0	0	0
	CAG-303_.spp	0	0	0	0	0	0	0	0	0	0	0	0	0	48	0	0	0	0	0	0	0	0	126	0	0	0	0	0	0	0	0	0	0	0	0	192	0	0	0	0	0	0	0	0	0	0	0	0
	Flavonifractor_.spp	0	0	0	0	0	0	0	0	0	0	0	0	0	0	0	0	24	290	0	0	0	0	0	0	413	0	0	0	0	0	0	0	0	0	0	0	216	0	0	0	0	0	0	0	0	24	0	0
	Romboutsia_A_weinsteinii	0	0	0	0	0	0	0	0	0	0	0	0	0	0	0	0	0	0	0	0	0	0	0	0	0	0	0	0	0	0	0	0	0	0	0	0	0	0	0	0	0	0	0	0	0	0	0	0
	Clostridioides_difficile_A	0	0	0	0	0	0	0	0	0	0	0	0	0	0	0	0	0	0	0	0	0	0	0	0	0	0	0	0	0	0	0	0	0	0	0	0	0	0	0	0	0	0	0	0	0	0	0	0
	Melissococcus_plutonius	0	0	0	0	0	0	0	0	0	0	0	0	0	0	0	0	0	0	0	0	0	0	0	0	0	0	0	0	0	0	0	0	0	0	0	0	0	0	0	0	0	0	0	0	0	0	0	0
	Alistipes_onderdonkii	0	0	0	0	0	0	0	0	0	0	5501	0	76992	15324	394313	0	0	14038	3086	1835968	0	51141	79876	0	0	0	0	0	0	0	0	0	0	0	0	0	0	35762	0	0	0	0	0	0	0	1495224	4915287	0
	Veillonella_nakazawae	17496	132818	33993	0	0	55975	835695	0	6979	884	11238	28604	1459	433	0	8340	0	0	0	12243	1722	22813	39014	0	0	139	5868	0	0	0	1577	22330	811	0	0	68795	0	0	2317	9308	68216	1039	2001	34942	43397	2639	0	1485
	Enterobacter_.spp	0	0	0	0	0	0	0	0	0	0	0	0	0	0	0	0	0	0	0	0	0	0	0	0	0	0	0	0	4748	0	0	0	0	0	0	0	0	0	0	0	0	0	0	0	0	0	0	0
	Clostridium_isatidis	150	0	0	0	0	511	0	0	0	0	0	0	0	0	0	0	0	0	0	0	0	0	0	0	5819	0	0	0	0	134	0	0	0	0	0	0	0	0	0	0	0	0	0	0	0	0	0	0
	Stoquefichus_.spp	0	0	0	0	0	0	0	0	0	0	0	0	0	0	0	0	112	0	0	0	0	0	0	0	0	0	0	0	0	0	0	0	0	0	0	0	0	0	0	0	0	0	0	0	0	0	0	0
	Ventrimonas_.spp	0	0	0	0	0	0	0	0	0	0	0	0	0	14400	0	0	0	0	139	0	0	0	2700	0	0	0	0	0	0	0	0	0	0	0	0	0	0	1676	829	0	0	10869	0	0	0	0	0	0
	Enterobacter_huaxiensis	0	0	0	0	0	0	0	0	0	0	0	0	0	0	0	0	0	0	0	0	0	0	0	0	0	0	0	0	14245	0	0	0	0	0	0	0	0	0	0	0	0	0	0	0	0	0	0	0
	Pasteurella_dagmatis	0	90	68	0	11	0	0	0	0	0	0	56	0	0	0	0	0	0	0	0	0	0	68	0	0	22	0	0	0	0	0	0	0	0	0	0	0	0	0	123	0	0	0	0	0	0	0	0
	Peptacetobacter_hominis	0	0	0	0	0	0	0	0	0	0	0	0	0	0	0	0	0	0	0	0	0	0	0	0	0	0	0	0	0	0	0	0	0	0	0	0	0	0	0	0	0	0	0	0	0	0	0	0
	Enterocloster_asparagiformis	0	0	0	0	0	0	0	0	0	0	0	0	0	0	1953	0	0	0	0	0	0	0	0	0	0	0	0	0	0	0	0	0	0	0	0	0	0	0	0	0	0	0	0	0	0	0	0	0
	MGBC113645_.spp	0	0	0	0	0	0	0	0	0	0	0	0	0	102	0	0	0	0	0	0	0	0	0	0	0	0	0	0	0	0	0	0	0	0	0	0	0	0	0	0	0	0	0	0	0	0	0	0
	Tatumella_.spp	0	0	0	0	0	0	0	0	58	0	0	0	0	0	0	0	0	0	0	0	0	0	0	0	0	0	0	0	143	0	0	0	0	0	0	0	0	0	0	0	0	0	0	0	0	0	0	0
	Eggerthella_sinensis	0	0	0	0	0	0	0	0	9339	1539	0	0	0	0	0	1370	1043	0	0	0	0	0	0	599	0	0	0	0	0	1321	0	0	0	0	0	0	1768	0	0	0	0	0	0	0	734	0	0	0
	Bacteroides_faecis	0	31754	0	235268	0	0	0	0	0	0	43918	0	83331	19072	106176	0	0	13438	4525	126758	0	85929	31509	132625	0	0	0	0	0	0	0	0	0	4211	0	0	212009	180321	46376	128754	325	0	0	0	0	74190	42438	0
	Canicola_haemoglobinophilus	0	0	0	0	0	0	0	0	0	0	0	0	0	0	0	0	0	0	0	0	0	0	0	0	0	0	0	0	0	0	0	0	0	0	0	0	0	0	0	0	0	0	0	0	0	0	0	0
	Salmonella_arizonae	0	0	0	0	0	0	0	0	169	0	0	0	0	0	0	0	0	0	0	0	0	0	0	0	0	0	166	0	0	0	0	0	0	0	0	0	0	0	0	0	0	0	0	0	0	0	0	0
	Longicatena_caecimuris	0	0	0	0	0	0	0	0	0	0	0	0	0	0	0	0	0	0	0	0	0	0	0	0	0	0	0	0	0	0	0	0	0	0	0	0	0	0	0	0	0	0	0	0	0	0	0	0
	Veillonella_montpellierensis	124	2289	2595	0	0	3784	19853	0	271	70	0	1785	0	0	0	0	0	0	0	0	0	35	501	0	0	0	0	0	0	0	106	983	0	0	0	724	0	0	0	256	1373	0	0	833	1869	0	0	0
	Salmonella_bongori	0	0	0	0	0	0	0	0	1001	0	0	0	0	0	0	0	0	0	0	0	0	0	0	0	0	0	0	0	561	0	91	636	0	1578	0	0	0	0	0	233	0	0	0	324	0	0	0	0
	Choladocola_avistercoris	0	0	0	0	0	0	0	0	0	0	293	0	0	0	0	0	0	0	129	0	0	0	167	0	0	0	0	0	0	0	0	0	0	0	0	55	0	0	0	0	0	321	0	0	0	221	0	0
	Faecalimonas_umbilicata	0	0	0	0	0	0	0	0	0	0	0	0	0	0	0	0	0	0	0	0	0	0	0	0	0	0	0	0	0	0	0	0	0	0	0	0	0	0	0	0	0	0	0	311	17104	0	0	0
	Clostridioides_difficile	0	0	0	1356	0	0	0	0	0	0	0	0	0	0	0	0	0	0	0	0	0	0	0	47381	7522	0	0	0	0	0	0	0	15723	170	0	0	0	0	0	0	0	0	0	0	0	0	0	0
	Faecalimonas_.spp	0	0	0	0	0	0	0	0	0	0	0	0	0	0	0	0	0	0	0	0	0	0	113	0	0	0	0	0	0	0	0	0	0	0	0	0	0	0	0	0	0	0	0	0	0	114	0	0
	Bacteroides_ovatus	0	356487	0	0	0	0	0	0	0	0	107552	0	611711	139965	98385	0	0	110665	72581	561955	0	440336	884065	2992664	0	0	0	0	0	0	0	0	0	0	52884	0	101781	10548	191163	55708	0	0	329	0	0	21616	6496	0
	Intestinimonas_massiliensis	0	0	0	0	0	0	0	0	0	0	0	0	0	0	0	0	0	352	0	0	0	1505	0	0	115	0	0	0	0	0	0	0	0	0	0	0	233	0	0	161	0	2200	0	0	0	467	0	0
	Basfia_A_langaaensis	0	168	143	0	66	0	0	0	0	0	0	85	0	0	0	0	0	0	0	0	0	0	0	0	0	0	0	0	0	0	0	0	0	0	0	0	0	0	0	37	0	0	0	0	0	0	0	0
	Faecalibacillus_faecis	0	0	0	0	0	0	0	0	0	0	0	0	0	434	866	0	0	0	406	0	0	0	0	0	0	0	0	0	0	0	0	0	0	0	0	0	0	0	364	0	0	0	0	0	0	0	0	0
	Kluyvera_intermedia	2665	0	0	0	0	701	0	0	4631	0	0	0	0	0	0	1793	0	0	0	0	0	0	0	0	925	0	107	0	8179	0	0	216	326	2469	0	0	0	0	0	0	0	0	0	53	0	0	0	0
	Clostridium_saudiense	0	0	0	0	0	0	0	0	0	0	0	0	0	0	0	0	0	0	0	0	0	0	0	0	0	0	0	0	0	0	0	0	0	0	0	0	0	0	0	0	0	0	0	0	0	0	0	0
	Mediterraneibacter_torques	0	746	0	0	0	0	0	0	0	0	0	0	24800	0	4955	0	0	0	35931	0	0	0	33	0	0	0	0	0	0	0	0	0	0	0	0	0	0	20358	0	7452	0	8238	0	0	0	87143	9086	0
	Lacrimispora_.spp	0	0	0	0	0	0	0	0	0	0	0	0	0	0	0	0	0	0	0	0	0	0	0	0	1426	0	0	0	0	0	0	0	0	0	0	137	0	0	0	0	0	0	0	0	0	0	0	0
	Stoquefichus_massiliensis	0	0	0	0	0	0	0	0	0	0	0	0	0	0	0	0	0	0	0	0	0	0	0	0	0	0	0	0	0	0	0	0	0	0	0	0	0	0	0	0	0	0	0	0	0	0	0	0
	Bacteroides_faecichinchillae	0	2094	0	1031	0	0	0	0	0	0	3826	0	5838	936	3262	0	0	1389	101	3686	0	5962	2097	11774	0	0	0	0	0	0	0	0	0	827	0	0	4828	5100	2309	11113	0	0	0	0	0	2703	909	0
	Weimeria_.spp	0	0	0	0	0	0	0	0	0	0	0	0	0	0	0	0	0	0	0	0	0	0	252	0	0	0	0	0	0	0	0	0	0	0	0	0	0	0	0	0	0	0	0	0	0	0	0	0
	Alistipes_dispar	0	0	0	0	0	0	0	0	0	0	0	0	730	703	1099	0	0	0	227	7286	0	8148	231	0	0	0	0	0	0	0	0	0	0	0	0	0	0	4013	0	0	0	0	0	0	0	16698	56431	0
	Kosakonia_oryzendophytica	47	118	0	0	47	0	94	0	947	0	0	0	47	0	0	261	0	0	0	0	0	0	0	0	308	0	285	236	1575	0	237	235	379	814	0	0	0	0	0	168	0	0	0	191	0	0	0	0
	Bacteroides_uniformis	0	5922	0	0	0	0	0	0	0	0	11607	0	0	177040	101081	0	0	44057	32537	263361	0	572	16419	124	0	0	0	0	0	0	0	0	0	0	17852	0	0	153432	152	0	16534	0	0	0	0	319965	891675	0
	Romboutsia_ilealis	0	0	0	0	0	0	0	0	0	0	0	0	0	0	0	0	0	0	0	0	0	0	0	0	0	0	0	0	0	0	0	0	0	0	0	0	0	0	0	0	0	0	0	0	0	0	0	0
	Bacteroides_finegoldii	0	50515	0	63579	0	0	0	4436	0	0	67125	0	88781	25752	46500	0	3890	38954	15689	110673	0	105062	90540	358274	0	0	0	0	0	0	2884	0	0	20993	2932	1896	76564	65856	48234	167018	4854	3174	0	0	0	36311	20227	52
	RHBSTW-00994_.spp	540	301	49	0	149	99	75	0	1256	0	0	0	24	0	0	498	0	0	0	0	0	0	0	0	862	0	248	225	10802	0	172	370	199	1251	0	0	0	0	0	174	0	0	0	425	0	0	0	0
	Muricomes_intestini	0	0	0	0	0	0	0	0	0	0	0	0	0	0	0	0	0	0	0	0	0	0	0	0	0	0	0	0	0	0	0	0	0	0	0	0	0	0	0	0	0	0	0	0	0	116	0	0
	Clostridium_gasigenes	17	0	0	0	0	244	0	0	0	0	0	0	0	0	0	0	0	0	0	0	0	0	0	0	3478	0	0	0	0	0	0	0	0	0	0	0	0	0	0	0	0	0	0	0	0	0	0	0
	Bacteroides_E_coprosuis	0	0	0	0	0	0	0	0	0	0	0	0	0	0	0	0	0	0	0	0	0	21	0	77	0	0	0	0	0	0	0	0	0	0	0	0	0	139	0	130	0	0	0	0	0	0	0	0
	Anaerobutyricum_hallii	0	0	0	0	0	0	0	0	0	0	39	0	0	0	0	0	0	0	659	0	0	27253	0	0	0	0	0	0	0	0	0	0	0	0	0	0	0	642	26624	0	0	688	0	0	0	1494	4459	0
	Clostridium_chauvoei	21	0	0	0	0	430	0	0	0	0	0	0	0	0	0	0	0	0	0	0	0	0	0	0	4911	0	0	0	0	0	0	0	0	0	0	0	0	0	0	0	0	0	0	0	0	0	0	0
	Dysgonomonas_massiliensis	0	0	0	0	0	0	0	0	0	0	0	0	0	0	0	0	0	0	0	0	0	0	0	0	0	0	0	0	0	0	0	0	0	0	0	0	0	0	0	0	0	0	0	0	0	0	0	0
	Alistipes_avistercoris	0	0	0	0	0	0	0	0	0	0	0	0	794	748	2243	0	0	0	401	10655	0	10775	0	0	0	0	0	0	0	0	0	0	0	0	0	0	0	7671	0	0	0	0	0	0	0	7462	24070	0
	Fusicatenibacter_saccharivorans	0	0	0	0	0	0	0	0	0	0	10055	0	11472	3484	0	0	0	0	0	3733	0	17578	4519	0	0	0	0	0	0	0	0	0	0	0	0	0	0	3368	13583	0	0	17960	2625	0	0	3891	2697	0
	Conservatibacter_flavescens	0	0	0	0	0	0	0	0	0	0	0	0	0	0	0	0	0	0	0	0	0	0	0	0	0	0	0	0	0	0	0	0	0	0	0	0	0	0	0	0	0	0	0	0	0	0	0	0
	Paraclostridium_sordellii	0	0	0	0	0	3514	0	0	0	0	0	0	0	0	0	0	0	0	0	0	0	0	0	0	0	0	0	0	0	0	0	0	0	0	0	0	0	0	0	0	0	0	0	0	0	0	0	0
	B14_.spp	0	0	0	0	0	0	0	0	294	0	0	0	0	0	0	28	0	0	0	0	0	0	0	0	14	0	0	0	0	0	0	0	0	98	0	0	0	0	0	0	0	0	0	0	0	0	0	0
	Lachnospira_eligens_A	0	0	0	0	0	0	0	0	0	0	307	0	0	30614	5105	10793	0	0	21599	27507	0	0	89790	0	0	0	0	0	0	0	0	0	0	0	0	625006	0	0	65312	0	0	102957	0	0	0	0	0	0
	Bacteroides_stercoris	0	0	0	0	0	0	0	0	0	0	12764	0	0	1707	2231	0	0	205	0	263534	0	419	65753	640	0	0	0	0	0	0	0	0	0	0	0	0	0	686511	57992	346	0	0	0	0	0	5384	10631	0
	Ruminococcus_E	0	0	0	0	0	0	0	0	0	0	49	0	0	959	0	0	0	0	0	1379	5721	0	0	0	0	0	0	0	0	0	0	0	0	0	0	0	0	2624	4131	0	0	937	0	0	0	0	50	0
	Bacteroides_rodentium	0	259	0	0	0	0	0	0	0	0	819	0	288	1382	1519	0	0	85	620	5559	0	600	1224	324	0	0	0	0	0	0	0	0	0	0	0	0	0	5314	257	381	0	0	0	0	0	3267	5098	0
	Bacteroides_fragilis	0	763556	0	754	0	0	0	985295	0	0	25757	0	458755	2578	555080	0	727433	196030	9357	44802	0	10482	306950	154928	0	0	0	0	0	0	6608679	0	0	30498	322023	4555815	1679103	81191	26121	909319	20870	413543	0	0	0	151774	52424	0
	Parabacteroides_faecavium	0	0	0	0	0	0	0	0	0	0	0	0	0	0	0	0	0	0	0	0	0	917	0	0	0	0	0	0	0	0	0	0	0	0	0	0	0	0	0	0	0	92	0	0	0	0	0	0
	Enterocloster_aldenensis	0	0	0	0	0	0	0	0	0	0	0	0	0	0	3042	0	79768	1862	0	0	0	0	0	734	0	0	0	0	0	0	0	0	0	0	0	0	0	0	0	0	0	11906	0	0	46157	7434	30375	0
	Klebsiella_oxytoca_C	0	0	0	0	0	0	0	0	0	0	0	0	0	0	0	0	0	0	0	0	0	0	0	0	0	0	0	0	0	0	0	0	0	0	0	0	0	0	0	0	0	0	0	0	0	0	0	0
	Lachnoclostridium_A_avicola	0	0	0	0	0	0	0	0	0	0	0	0	0	0	0	0	0	0	0	0	0	0	0	0	0	0	0	0	0	0	0	0	0	0	0	123	0	0	0	0	0	0	0	0	0	0	0	0
	Lachnoclostridium_B_faecipullorum	0	0	0	0	0	0	0	0	0	0	0	0	0	0	0	0	0	0	0	0	0	0	37	0	0	0	0	0	0	0	0	0	0	0	0	0	0	0	0	0	0	0	0	0	0	0	0	0
	Clostridium_butyricum	0	0	0	101	0	454	14534	0	556	499	0	0	0	0	0	0	0	0	0	0	0	0	0	0	1390993	0	0	0	0	0	0	0	0	0	0	0	0	0	0	0	0	0	0	0	0	3125	0	0
	Atlantibacter_hermannii	3559	1287	59	0	946	580	745	0	3687	293	0	0	176	0	0	2878	468	0	0	0	0	0	0	349	2114	0	1041	524	8153	0	2118	706	1790	3218	0	0	0	0	0	651	0	0	0	1127	0	0	0	0
	Paraprevotella_.spp	0	144	0	0	0	0	0	0	0	0	414	0	314	70	316	0	0	36	0	321	0	243	370	0	0	0	0	0	0	0	0	0	0	0	0	0	0	2050	0	76	0	0	0	0	0	219	38	0
	Fusicatenibacter_.spp	0	0	0	0	0	0	0	0	0	0	1390	0	1279	21841	0	0	0	0	0	259	0	2481	991	0	0	0	0	0	0	0	0	0	0	0	0	0	0	902	1355	0	0	3076	0	0	0	253	0	0
	Rodentibacter_trehalosifermentans	0	43	63	0	0	0	0	0	0	0	0	0	0	0	0	0	0	0	0	0	0	0	0	0	0	0	0	0	0	0	0	0	0	0	0	0	0	0	0	149	0	0	0	0	0	0	0	0
	Bacteroides_caccae	0	35947	0	68341	0	0	0	2311	0	0	481409	0	66729	21194	93578	0	1983	384788	12419	85615	0	437476	74142	271124	0	0	0	0	0	0	490	0	0	15889	2159	166	69061	59733	38596	395590	2804	2423	0	0	0	40213	18635	0
	Merdimonas_massiliensis	0	0	0	0	0	0	0	0	0	0	0	0	0	0	0	153	0	0	0	0	0	0	281	0	0	0	0	0	0	0	0	0	0	0	0	0	431	0	0	0	0	0	0	0	0	536	108	0
	Enterocloster_clostridioformis	0	0	0	0	0	0	0	0	0	0	0	0	0	0	0	0	0	0	0	0	0	0	0	0	0	0	0	0	0	0	0	0	0	0	0	415	0	0	0	0	0	0	0	0	0	24800	10035	0
	Bacteroides_oleiciplenus	0	169	0	0	0	0	0	0	0	0	3689	0	401	309	900	0	0	306	0	1676	0	6337	1708	459	0	0	0	0	0	0	0	0	0	0	0	0	111	1855	965	718	0	0	0	0	0	1563	1011	0
	Phocaeicola_A	0	45	0	0	0	0	0	0	0	0	215	0	627	167	425	0	0	635	0	1573	0	380	176	0	0	0	0	0	0	0	0	0	0	0	0	0	45	2657	0	599	0	0	0	0	0	554	788	0
	Bacteroides_pyogenes	0	8358	0	16617	0	0	0	19289	0	0	9593	0	13868	4390	12359	0	12149	7151	1994	20542	0	13864	9820	31021	0	0	0	0	0	0	8877	0	0	4080	699	6028	22204	26837	6154	27108	325	10278	0	0	0	13751	11651	0
	Veillonella_tobetsuensis	407	20041	45165	0	0	26101	175835	0	338	0	566	25731	0	0	0	50	0	0	0	0	0	210	2888	0	0	73	365	0	0	0	547	12814	0	0	0	5151	0	0	0	908	12508	0	0	3004	13154	0	0	0
	Volucribacter_psittacicida	0	0	0	0	0	0	0	0	0	0	0	0	0	0	0	0	0	0	0	0	0	0	0	0	0	0	0	0	0	0	0	0	0	0	0	0	0	0	0	9	0	0	0	0	0	0	0	0
	Parabacteroides_.spp	0	14630	0	0	0	0	0	0	0	0	1149	0	18761	4986	1665	0	0	1067	1330	3631	21595	23756	1676	0	0	0	0	0	0	0	0	0	0	20573	216	0	0	6602	842	344	0	32633	0	0	0	131	39	0
	Lonepinella_koalarum	0	115	21	0	0	0	0	0	0	0	0	0	0	0	0	0	0	0	0	0	0	0	0	0	0	10	0	0	0	0	0	0	0	0	0	0	0	0	0	21	0	0	0	0	0	0	0	0
	Klebsiella_michiganensis	0	0	0	0	0	0	0	0	0	0	0	0	0	0	0	0	0	0	0	0	0	0	0	0	0	0	0	0	0	0	0	0	0	0	0	0	0	0	0	0	0	0	0	0	0	0	0	0
	Basfia_A_porcinus	0	42	0	0	0	0	0	0	0	0	0	0	0	0	0	0	0	0	0	0	0	0	0	0	0	0	0	0	0	0	0	0	0	0	0	0	0	0	0	161	0	0	0	0	0	0	0	0
	Parabacteroides_gordonii	0	1594	0	0	0	0	0	0	0	0	964	0	1225	0	344	0	0	0	0	733	0	40712	116	0	0	0	0	0	0	0	0	0	0	2267	0	0	0	1413	1456	0	0	26440	0	0	0	342	559	0
	Eubacterium_I	0	0	0	0	0	0	0	0	0	0	117	0	291	4734	0	0	0	0	1181	545	0	327	5008	0	0	0	0	0	0	0	0	0	0	0	0	53	0	7362	52	0	0	5925	0	0	0	0	0	0
	Citrobacter_freundii	0	0	0	0	0	0	0	0	0	0	0	0	0	0	0	0	0	0	0	0	0	0	0	0	0	0	0	0	37087	0	0	0	0	0	0	0	0	0	0	0	0	0	0	0	0	0	0	0
	Phocaeicola_vulgatus	0	66832	0	0	0	0	0	0	0	0	133305	0	240034	12457	447011	0	0	42459	18303	382376	0	170130	221778	575709	0	0	0	0	0	0	0	0	0	81584	0	0	0	438656	70164	925337	0	101610	3435	0	0	672685	1339727	0
	Bacteroides_.spp	0	41936	0	37206	0	0	0	14625	0	0	91922	0	66662	40788	70657	0	12240	41886	13066	187459	0	102342	80708	196075	0	0	0	0	0	0	15742	0	0	16453	2241	11691	78873	276079	40968	143691	2019	17496	0	0	0	101002	136135	0
	Bacteroides_nordii	0	7212	0	4727	0	0	0	21013	0	0	9918	0	13141	9789	15065	0	14516	6043	1148	18650	0	10822	8947	31212	0	0	0	0	0	0	18497	0	0	1969	737	8686	24778	423308	7985	34314	0	14214	0	0	0	83103	8830	0
	Klebsiella_huaxiensis	15726	0	0	0	0	4508	0	0	2190	0	0	0	0	0	0	2678	0	0	0	0	0	0	0	0	288	0	0	0	17281	0	0	0	0	2105	0	0	0	0	0	0	0	0	0	0	0	0	0	0
	Clostridium_paraputrificum	0	0	0	0	0	89512	0	0	123	367	0	0	0	0	0	0	0	0	0	0	0	0	0	0	3529	0	0	0	0	708	0	0	10487	0	0	0	0	0	0	0	0	0	0	0	0	0	0	0
	UBA2821_.spp	0	0	0	0	0	0	0	0	0	0	0	0	0	286	0	0	0	0	0	0	0	44	221	0	0	0	0	0	0	0	0	0	0	0	0	293	0	0	33	0	0	88	0	0	0	0	0	0
	Blautia_stercoris	0	0	0	0	0	0	0	0	0	0	506	0	0	11336	0	0	0	0	0	0	0	0	32	0	0	0	0	0	0	0	0	0	0	0	0	0	0	0	1912	0	0	32	0	0	0	0	0	0
	Haemophilus_A	0	2689	550	0	0	0	0	0	0	0	0	549	0	0	0	0	0	0	0	0	0	0	0	0	0	0	0	0	0	0	0	0	1231	0	0	0	0	0	0	357	0	0	0	0	0	0	0	0
	Agathobacter_ruminis	0	0	0	0	0	0	0	0	0	0	88	0	77	219	0	0	0	0	98	76	0	54	760	0	0	0	0	0	0	0	0	0	0	0	0	156	0	0	0	0	0	97	0	0	0	0	0	0
	Agathobacter_.spp	0	0	0	0	0	0	0	0	0	0	2052	0	2353	22637	0	4358	0	0	1094	1304	0	681	13396	0	0	0	0	0	0	0	0	0	0	0	0	886	0	95	808	0	0	614	0	0	0	0	0	0
	Bacteroides_gallinarum	0	215	0	0	0	0	0	0	0	0	3149	0	299	3684	3137	0	0	1382	295	39607	0	1240	9904	566	0	0	0	0	0	0	0	0	0	0	0	0	43	80374	7730	1481	0	0	0	0	0	8501	15738	0
	Rodentibacter_heidelbergensis	0	0	141	0	0	0	0	0	0	0	0	0	0	0	0	0	0	0	0	0	0	0	0	0	0	0	0	0	0	0	0	0	0	0	0	0	0	0	0	123	0	0	0	0	0	0	0	0
	Parasutterella_gallistercoris	0	0	0	0	0	0	0	0	0	0	0	0	0	0	0	0	0	0	0	0	0	0	0	0	0	0	0	0	0	0	0	0	0	0	0	0	0	0	0	0	0	0	0	0	0	0	0	0
	Bacteroides_stercorirosoris	0	0	0	0	0	0	0	0	0	0	5896	0	238	1231	2483	0	0	0	0	10138	0	9276	3943	1012	0	0	0	0	0	0	0	0	0	0	0	0	0	9036	1253	495	0	0	0	0	0	3767	6334	0
	Rodentibacter_myodis	0	679	524	0	292	0	211	0	0	0	0	320	0	0	0	0	0	0	0	0	0	0	354	0	0	410	0	0	0	0	0	0	0	0	0	0	0	0	0	436	122	0	0	0	0	0	0	0
	Flavonifractor_plautii	0	22936	0	58564	0	0	0	0	0	57540	491	0	8564	96	15416	0	82229	138975	0	13402	0	3754	3062	74724	153762	0	0	0	0	17267	0	0	86199	7367	0	0	105119	10488	7071	80609	0	3708	0	680	8239	55585	32387	0
	Bacteroides_reticulotermitis	0	6465	0	11316	0	0	0	18	0	0	7380	0	11909	4079	10004	0	240	3198	1662	16757	0	13979	9851	41157	0	0	0	0	0	0	1418	0	0	3516	457	1046	17651	13870	7619	23883	412	1273	0	0	0	8073	4934	0
	Bacteroides_clarus	0	0	0	0	0	0	0	0	0	0	1679	0	0	1000	1226	0	0	0	0	27811	0	562	5153	0	0	0	0	0	0	0	0	0	0	0	0	0	0	60125	5844	45	0	0	0	0	0	2671	4960	0
	Pasteurella_multocida	0	395	454	0	280	0	87	0	0	0	0	298	0	0	0	0	0	0	0	0	0	0	368	0	0	331	0	0	0	0	0	0	0	0	0	0	0	0	0	582	103	0	0	0	0	0	0	0
	Agathobacter_faecis	0	0	0	1348	0	0	0	0	0	0	556	0	30615	30103	0	14467	0	0	16074	733	0	8885	22734	0	0	0	0	0	0	0	0	0	0	0	0	494	0	0	0	736	0	3124	0	0	0	0	0	0
	Fimousia_.spp	0	0	0	0	0	0	0	0	0	0	269	0	0	536	0	0	0	0	0	0	0	0	1092	0	0	0	0	0	0	0	0	0	0	0	0	0	0	338	0	0	0	0	0	0	0	0	0	0
	Lachnospira_rogosae_A	0	0	0	0	0	0	0	0	0	0	0	0	17341	9047	0	0	2847	0	0	567	0	2232	28505	0	0	0	0	0	0	0	0	0	0	0	0	15152	0	0	0	0	0	1059	0	0	2325	0	0	775
	GCA-900066495_.spp	0	0	0	0	0	0	0	0	0	0	0	0	0	0	0	0	0	0	0	0	0	0	0	0	0	0	0	0	0	0	0	0	0	0	0	0	0	0	0	0	0	0	0	0	0	0	0	0
	Romboutsia_D_lituseburensis	0	0	0	0	0	0	0	0	0	0	0	0	0	0	0	0	0	0	0	0	0	0	0	0	0	0	0	0	0	0	0	0	0	0	0	0	0	0	0	0	0	0	0	0	0	0	0	0
	Rodentibacter_.spp	0	1990	1848	0	618	0	485	0	0	0	0	1367	0	0	0	0	0	0	0	0	0	0	1039	0	0	1610	0	0	0	0	0	0	0	0	0	0	0	0	0	2226	64	0	0	0	0	0	0	0
	Bacteroides_acidifaciens	0	5120	0	0	0	0	0	0	0	0	8750	0	12223	682	6058	0	0	1106	0	3772	0	8980	10023	7726	0	0	0	0	0	0	0	0	0	569	0	0	0	5648	4912	15820	0	0	0	0	0	493	605	0
	Paralachnospira_caecorum	0	0	0	0	0	0	0	0	0	0	0	0	0	0	0	0	0	0	0	0	0	22	46	0	0	0	0	0	0	0	0	0	0	0	0	56	0	0	0	0	0	34	0	0	0	11	0	0
	Terrisporobacter_.spp	0	0	0	0	0	0	0	0	0	0	0	0	0	0	0	0	0	0	0	0	0	5954	656	0	0	0	0	0	0	0	0	0	0	0	0	0	0	1100	0	0	0	0	0	0	0	0	0	0
	Pullilachnospira_stercoravium	0	0	0	0	0	0	0	0	0	0	0	0	0	0	0	0	0	0	0	0	0	0	0	0	0	0	0	0	0	0	0	0	0	0	0	0	0	0	22	0	0	22	0	0	0	129	0	0
	Luxibacter_massiliensis	0	0	0	0	0	0	0	0	0	0	1640	0	0	0	0	0	0	0	0	1063	0	0	619	0	0	0	0	0	0	0	0	0	0	0	0	0	0	0	0	27834	0	411	0	0	0	14477	0	0
	Bacteroides_H	0	846	0	155	0	0	0	13	0	0	1331	0	1617	252	1613	0	0	294	55	2771	0	1743	1115	3832	0	0	0	0	0	0	27	0	0	432	0	0	1276	2819	765	3975	0	327	0	0	0	1727	1286	0
	Parasutterella_excrementihominis	0	0	0	0	0	0	0	0	0	0	0	0	0	0	0	0	0	0	0	0	0	0	0	0	0	0	0	0	0	0	0	0	0	0	0	0	0	0	0	0	0	0	0	0	0	0	0	0
	Massilibacteroides_vaginae	0	0	0	0	0	0	0	0	0	0	0	0	11	0	0	0	0	0	0	89	0	199	0	0	0	0	0	0	0	0	0	0	0	55	0	0	0	123	0	0	0	133	0	0	0	0	0	0
	Veillonella_caviae	1153	18657	24653	0	0	34903	137333	0	2364	72	662	18435	0	0	0	309	0	0	0	321	387	1121	3456	0	0	233	538	0	0	0	1041	7534	12	0	0	5097	0	0	199	2189	10335	73	319	5744	10950	0	0	0
	Bacteroides_ndongoniae	0	1589	0	491	0	0	0	529	0	0	3122	0	2549	3731	5329	0	804	2597	648	14536	0	3393	3368	3968	0	0	0	0	0	0	1014	0	0	257	184	346	4954	17749	2638	7376	32	1894	0	0	0	9527	16489	0
	Marvinbryantia_.spp	0	0	0	0	0	0	0	0	0	0	0	0	0	269	0	0	0	0	0	0	0	0	362	0	0	0	0	0	0	0	0	0	0	0	0	0	0	55	0	0	0	387	0	0	0	0	0	0
	Pelethocola_.spp	0	0	0	0	0	0	0	0	0	0	0	0	0	0	0	0	0	0	0	0	0	186	0	0	0	0	0	0	0	0	0	0	0	0	0	0	0	0	0	0	0	47	0	0	0	0	0	0
	Bacteroides_fluxus	0	2749	0	111	0	0	0	5041	0	0	5135	0	4253	11764	13282	0	4200	3618	2674	32278	0	5190	7465	13029	0	0	0	0	0	0	1891	0	0	1019	909	1567	6262	47740	4465	11852	584	5721	0	0	0	31274	61427	0
	Roseburia_.spp	0	0	0	0	0	0	0	0	0	0	10864	0	1522	16303	0	0	0	0	30158	15955	1474	56726	303792	0	0	0	0	0	0	0	0	0	0	0	0	10364	0	18682	4502	0	0	19717	0	0	0	0	0	0
	Phocaeicola_sartorii	0	3248	0	0	0	0	0	0	0	0	9543	0	11648	472	27330	0	0	3756	1094	22688	0	11369	12656	37744	0	0	0	0	0	0	0	0	0	3463822	0	0	0	26454	6573	74674	0	66673	0	0	0	39641	78603	0
	Lelliottia_nimipressuralis	935	243	0	0	385	242	0	0	2658	0	0	0	0	0	0	1524	0	0	0	0	0	0	0	0	1208	0	389	0	15532	0	147	245	196	2269	0	0	0	0	0	48	0	0	0	201	0	49	0	0
	Phocaeicola_.spp	0	3096	0	0	0	0	0	553	0	0	5256	4402	8189	793	25482	0	597	3068	663	17060	16047	7717	5433	15369	0	0	0	0	0	0	657	0	0	16503	0	304	2531	519320	3184	30513	0	10607	9328	0	0	16266	19079	0
	Clostridium_neonatale	0	0	0	38609	0	0	0	0	44516	33025	0	0	0	0	0	0	0	0	0	0	0	0	0	0	3415461	0	0	0	0	2156	0	0	20086	0	0	0	0	0	0	0	0	0	0	0	0	0	0	0
	Mediterraneibacter_norwichensis	0	0	0	0	0	0	0	0	0	0	0	0	0	0	0	0	0	0	0	0	0	0	0	0	0	0	0	0	0	0	0	0	0	0	0	0	0	0	0	0	0	0	0	0	0	0	0	0
	Enterocloster_excrementigallinarum	0	0	0	0	0	0	0	0	0	0	0	0	0	0	0	0	0	0	0	0	0	0	0	0	0	0	0	0	0	0	0	0	0	0	0	0	0	0	0	0	0	0	0	0	0	0	0	0
	Klebsiella_oxytoca	0	0	0	0	0	0	0	0	0	0	0	0	0	0	0	0	0	0	0	0	0	0	0	0	0	0	0	0	0	0	0	0	0	0	0	0	0	0	0	0	0	0	0	0	0	0	0	0
	Veillonella_parvula_A	1905	22889	4831	0	1566	734662	132652	0	75092	0	1420	8608	0	754	0	1636	0	153	1288	573	10918	4870	11874	0	0	0	79	0	0	0	22990	28824	548	0	0	6762	4043	0	1195	76173	27550	2875	9513	94830	98208	1188	0	0
	Phocaeicola_excrementipullorum	0	0	0	0	0	0	0	0	0	0	0	0	0	0	0	0	0	0	0	280	0	0	0	0	0	0	0	0	0	0	0	0	0	0	0	0	0	1758	0	42	0	0	0	0	0	602	410	0
	Bacteroides_avicola	0	285	0	0	0	0	0	405	0	0	926	0	730	870	1237	0	312	873	217	1961	0	884	668	1372	0	0	0	0	0	0	156	0	0	727	0	116	466	4820	469	1286	0	1739	12	0	0	2247	3166	0
	Bacteroides_massiliensis_B	0	645	0	29	0	0	0	303	0	0	1023	0	1168	1026	1542	0	464	861	149	3492	0	1801	966	1865	0	0	0	0	0	0	167	0	0	577	0	76	749	5153	766	2021	0	969	0	0	0	2752	3783	0
	Bacteroides_neonati	0	1174	0	0	0	0	0	2763	0	0	503	0	1606	186	1367	0	1569	453	62	1303	0	734	1017	3066	0	0	0	0	0	0	3392	0	0	124	15	2336	2378	2640	464	2446	0	2584	0	0	0	2556	1784	0
	Paraclostridium_bifermentans	0	0	0	0	0	0	0	0	0	0	0	0	0	0	0	0	0	0	0	0	0	0	0	0	0	0	0	0	0	0	0	0	0	0	0	0	0	0	0	0	0	0	0	0	0	0	0	0
	Bacteroides_heparinolyticus	0	1150	0	0	0	0	0	0	0	0	3193	0	2346	7846	5845	0	125	4342	1788	17803	0	2909	3532	5615	0	0	0	0	0	0	93	0	0	123	306	0	1458	19653	1261	4248	31	281	0	0	0	15190	34253	0
	Bacteroides_eggerthii	0	1337	0	0	0	0	0	0	0	0	4652	0	1834	4118	4654	0	0	2585	457	58256	0	2954	12839	6399	0	0	0	0	0	0	0	0	0	275	0	0	2247	112483	10050	5231	0	160	0	0	0	10519	14478	0
	Anaerostipes_caccae	0	0	0	0	0	0	0	0	0	0	0	0	0	0	0	0	0	0	0	0	0	0	0	0	0	0	0	0	0	0	0	0	0	0	0	0	0	0	0	0	0	0	0	0	0	0	0	0
	Paraclostridium_tenue	0	0	0	0	0	0	0	0	0	0	0	0	0	0	0	0	0	0	0	0	0	0	0	0	0	0	0	0	0	0	0	0	0	0	0	0	0	0	0	0	0	0	0	0	0	0	0	0
	Basfia_bettyae	0	374	365	0	170	0	103	0	0	0	0	268	0	0	0	0	0	0	0	0	0	0	235	0	0	237	0	0	0	0	0	0	0	0	0	0	0	0	0	455	165	0	0	0	0	0	0	0
	Bacteroides_massiliensis	0	181	0	0	0	0	0	0	0	0	533	0	443	1510	922	0	0	467	0	4032	0	302	529	846	0	0	0	0	0	0	0	0	0	0	0	0	244	4946	445	806	0	0	0	0	0	1803	3996	0
	Bacteroides_G_luti	0	264	0	0	0	0	0	0	0	0	261	0	429	11	333	0	0	60	0	719	0	416	336	420	0	0	0	0	0	0	0	0	0	72	0	0	96	773	131	761	0	107	0	0	0	357	228	0
	Macellibacteroides_fermentans	0	182	0	0	0	0	0	0	0	0	120	0	296	381	0	0	0	30	0	181	0	1326	0	0	0	0	0	0	0	0	0	0	0	243	0	0	0	272	0	120	0	1646	0	0	0	0	0	0
	Roseburia_intestinalis	0	0	0	0	0	0	0	0	0	0	0	0	0	7870	0	0	0	0	0	0	0	1498	621316	0	0	0	0	0	0	0	0	0	0	0	0	0	0	28298	11161	0	0	0	0	0	0	0	0	0
	Clostridium_Q_symbiosum	0	0	0	0	0	0	0	0	0	0	0	0	3994	0	135	0	0	0	0	0	0	0	0	0	0	0	0	0	0	0	0	0	0	0	0	0	0	0	0	0	0	40019	0	0	0	10955	1688	0
	Bacteroides_zoogleoformans	0	334	0	0	0	0	0	0	0	0	890	0	437	2085	1704	0	0	797	348	4246	0	984	486	659	0	0	0	0	0	0	0	0	0	0	0	0	207	5105	276	1218	0	300	0	0	0	3814	6447	0
	Eggerthella_lenta	0	0	0	12508	17135	0	0	3643	162612	49399	0	0	675	0	380	39762	45210	0	0	0	0	2422	0	25428	0	0	0	12819	0	34137	2775	1441	7102	0	0	0	53558	0	2253	0	0	1958	280	0	25228	6244	8681	0
	Phocaeicola_coprophilus	0	654	0	0	0	0	0	0	0	0	1956	0	1825	244	2085	0	36	707	0	3520	0	1725	1063	3279	0	0	0	0	0	0	35	0	0	2363	0	0	1424	13007	1149	7333	0	2354	0	0	0	3491	2863	0
	Anaerostipes_hadrus_A	0	0	0	0	0	0	0	0	0	0	0	0	672	0	2701	0	0	392	0	0	0	0	2739	0	0	0	0	0	0	0	0	0	0	0	0	4855	0	3295	1257	0	0	0	0	1242	844	2565	2223	0
	Romboutsia_D	0	0	0	0	0	0	0	0	0	0	0	0	0	0	0	0	0	0	0	0	0	0	0	0	0	0	0	0	0	0	0	0	0	0	0	0	0	0	0	0	0	0	0	0	0	0	0	0
	Bacteroides_togonis	0	489	0	0	0	0	0	0	0	0	1133	0	860	1030	1597	0	71	929	140	4340	0	1277	1017	1103	0	0	0	0	0	0	0	0	0	0	0	0	995	7333	854	2555	0	0	0	0	0	3646	4592	0
	Haemophilus_D_parainfluenzae_M	0	40727	32520	0	42051	776	1684	0	0	0	3403	13503	335	0	0	715	0	0	1189	11544	2166	3740	39097	0	0	17392	0	0	0	3322	396	2201	7914	0	0	2337	0	0	1969	60287	25067	93	12556	7806	0	636	0	0
	Flavonifractor_avistercoris	0	811	0	3343	0	0	0	0	0	3231	0	0	193	0	669	0	7554	10652	0	521	0	0	0	4806	12557	0	0	0	0	78	0	0	5478	0	0	0	7675	430	0	7000	0	0	0	0	0	3511	1867	0
	Asaccharospora_irregularis	0	0	0	0	0	0	0	0	0	0	0	0	0	0	0	0	0	0	0	0	0	0	0	180	0	0	0	0	0	0	0	0	0	0	0	0	0	0	0	0	0	0	0	0	0	0	0	0
	Clostridium_baratii	69	0	0	0	0	292	0	0	0	0	0	0	0	0	0	0	0	0	0	0	0	0	0	0	27117	0	0	0	0	0	0	0	0	0	0	0	0	0	0	0	0	0	0	0	0	0	0	0
	Phocaeicola_salanitronis	0	99	0	0	0	0	0	0	0	0	428	0	762	25	1118	0	0	149	0	1258	0	873	280	798	0	0	0	0	0	0	0	0	0	2258	0	0	25	3038	250	1755	0	769	0	0	0	1770	1777	0
	Parabacteroides_bouchesdurhonensis	0	682	0	0	0	0	0	0	0	0	158	0	645	247	537	0	0	213	24	1577	0	2835	649	12	0	0	0	0	0	0	0	0	0	12551	0	0	0	1350	37	202	0	1700	0	0	0	101	50	0
	Enterocloster_citroniae	0	0	0	0	0	0	0	0	0	0	0	0	0	0	1067	0	4176	0	0	0	0	0	0	0	0	0	0	0	0	0	0	0	0	0	0	40767	1816	0	0	0	0	6171	0	0	2081	2947	1563	0
	Mediterraneibacter_faecipullorum	0	0	0	0	0	0	0	0	0	0	0	0	145	192	0	0	0	0	0	0	0	170	24	0	0	0	0	0	0	121	0	0	0	0	0	0	0	414	0	0	0	423	0	0	0	1131	0	0
	Anaerostipes_rhamnosivorans	0	0	0	0	0	0	0	0	0	0	0	0	0	0	0	0	0	0	0	0	0	0	0	0	0	0	0	0	0	0	0	0	0	0	0	0	0	0	0	0	0	0	0	0	0	0	0	0
	UMGS1071_.spp	0	0	0	0	0	0	0	0	0	0	0	0	0	0	275	19362	0	0	0	0	0	0	308	0	0	0	0	0	0	0	0	0	0	0	0	0	0	3632	0	0	0	852	0	0	0	0	975	0
	Veillonella_denticariosi	781	10199	6122	0	0	33147	72669	0	3347	148	505	8761	0	0	0	399	0	0	0	329	280	1025	2306	0	0	0	259	0	0	0	1264	4094	0	0	0	3618	0	0	186	3204	13132	10	290	5500	7453	0	0	0
	Sellimonas_intestinalis	0	0	0	54035	0	0	0	0	0	0	0	0	0	0	0	0	0	0	0	0	0	0	0	0	0	0	0	0	0	0	0	0	0	0	0	0	0	0	0	0	0	0	0	0	0	38805	21589	0
	Erysipelatoclostridium_.spp	0	0	0	0	0	0	0	0	0	0	0	0	0	0	0	0	0	0	0	0	0	0	0	0	0	0	0	0	0	0	0	0	0	0	0	0	0	1522	3753	0	0	0	0	0	0	1575	8342	0
	Clostridium_P_mediterraneense	1670	0	0	0	0	464	0	0	52	0	0	0	0	0	0	0	0	0	0	0	0	0	26	0	22849	0	0	0	0	0	0	0	0	0	0	0	0	0	0	0	0	0	0	0	0	0	0	0
	Phocaeicola_massiliensis	0	405	0	0	0	0	0	0	0	0	613	0	1460	0	1611	0	0	156	0	2813	0	1047	826	3198	0	0	0	0	0	0	0	0	0	5680	0	0	0	5240	415	7928	0	4797	0	0	0	4860	4338	0
	Clostridium_celatum	0	0	0	0	0	0	0	0	0	0	0	0	0	0	0	0	0	0	0	0	0	0	1324	0	1303	0	0	0	0	0	0	0	0	0	0	0	0	0	0	0	0	0	0	0	0	0	0	0
	Phocaeicola_merdigallinarum	0	0	0	0	0	0	0	0	0	0	0	0	0	0	0	0	0	0	0	0	0	0	76	78	0	0	0	0	0	0	0	0	0	189	0	0	0	2734	0	742	0	0	0	0	0	77	315	0
	Bifidobacterium_animalis	0	0	0	2922	0	0	0	0	5191	0	0	0	0	0	0	0	0	0	0	0	0	0	0	0	0	0	0	0	0	0	0	0	0	0	0	0	0	0	0	0	0	0	0	0	0	95	0	0
	Phocaeicola_dorei	0	2680	0	0	0	0	0	0	0	0	5558	0	5818	1278	13818	0	0	2779	0	6717	0	6267	5262	16853	0	0	0	0	0	0	0	0	0	120494	0	0	0	10740	5285	22848	0	49691	0	0	0	14760	44097	0
	An181_.spp	0	0	0	0	0	0	0	0	0	0	0	0	0	0	0	0	0	0	0	0	0	0	99	0	0	0	0	0	0	102	0	0	0	0	0	0	0	66	0	0	0	0	0	0	0	188	0	0
	Blautia_A_excrementigallinarum	0	0	0	0	0	0	0	0	0	0	131	0	0	297	244	0	0	191	0	504	0	406	27	0	0	0	0	0	0	1038	0	0	0	0	0	0	0	0	216	0	0	1129	298	0	0	0	0	0
	Romboutsia_B_maritimum	0	0	0	0	0	0	0	0	0	0	0	0	0	0	0	0	0	0	0	0	0	0	0	88	0	0	0	0	0	0	0	0	0	0	0	0	0	0	0	0	0	0	0	0	0	0	0	0
	Parabacteroides_intestinipullorum	0	640	0	0	0	0	0	0	0	0	33	0	384	100	462	0	0	65	0	1162	0	2078	514	0	0	0	0	0	0	0	0	0	0	19151	0	0	0	1410	0	0	0	0	0	0	0	0	0	0
	Parabacteroides_acidifaciens	0	7838	0	0	0	0	0	0	0	0	102	0	10410	4062	78	0	0	0	0	541	0	3317	153	0	0	0	0	0	0	0	0	0	0	3821	0	0	0	954	51	0	0	2604	0	0	0	0	0	0
	Enterocloster_clostridioformis_A	0	0	0	0	0	0	0	0	0	0	0	0	0	0	0	0	0	0	0	0	0	0	0	0	0	0	0	0	0	0	0	0	0	0	0	0	300	0	0	0	0	0	0	0	0	562	0	0
	Enterocloster_porci	0	4198	0	0	0	0	0	0	0	0	0	0	2303	0	0	0	283	0	0	0	0	0	0	7000	0	0	0	0	0	26	0	0	0	0	0	396	0	0	0	0	0	206	0	1830	129	427	0	0
	CAG-41_.spp	0	0	0	0	0	0	0	0	0	0	1382	0	0	1887	0	0	0	0	0	7265	0	836	0	0	0	0	0	0	0	0	0	0	0	0	0	73327	0	0	0	0	0	92258	0	0	0	9980	163	0
	Parabacteroides_chinchillae	0	394	0	0	0	0	0	0	0	0	175	0	506	86	314	0	0	0	0	568	0	1695	149	0	0	0	0	0	0	0	0	0	0	8910	0	0	0	1065	50	164	0	1126	0	0	0	0	0	0
	Parabacteroides_distasonis_A	0	0	0	0	0	0	0	0	0	0	0	0	0	0	226	0	0	0	0	808	0	1280	0	0	0	0	0	0	0	0	0	0	0	13194	0	0	0	46	0	0	0	0	0	0	0	0	0	0
	Blautia_A_faecis	0	0	0	0	0	0	0	0	0	0	5280	0	0	6836	0	0	0	199	0	2945	0	696	2204	0	0	0	0	0	0	0	0	0	0	0	0	0	0	596	5559	0	0	2206	0	0	0	117	0	0
	Lachnoclostridium_A	0	0	0	0	0	0	0	0	0	0	0	0	0	0	0	0	0	0	0	0	0	0	0	0	1381	0	0	0	0	0	0	0	0	0	0	150	0	0	0	0	0	83	0	0	0	2296	0	0
	Romboutsia_timonensis	0	0	0	0	0	0	0	0	0	0	0	0	0	0	0	0	0	0	0	0	0	0	0	0	0	0	0	0	0	0	0	0	0	0	0	0	0	0	0	0	0	0	0	0	0	0	0	0
	CAG-56_.spp	0	0	0	0	0	0	0	0	0	0	123	0	0	173	0	0	0	0	0	0	0	89	240	0	0	0	0	0	0	0	0	0	0	0	0	36	0	0	0	0	0	277	0	0	0	17	0	0
	Haemophilus_D_parainfluenzae_J	0	132	229	0	434	0	0	0	0	0	0	0	0	0	0	0	0	0	0	216	0	0	880	0	0	347	0	0	0	0	0	0	0	0	0	0	0	0	0	4106	573	0	216	0	0	0	0	0
	Haemophilus_D_pittmaniae	0	804	987	0	238	0	0	0	0	0	0	516	0	0	0	0	0	0	0	0	0	0	962	0	0	603	0	0	0	0	0	0	0	0	0	0	0	0	0	801	92	0	24	0	0	0	0	0
	Coprobacillus_cateniformis	0	0	0	0	0	0	0	0	0	0	0	0	0	0	0	0	18337	0	0	0	0	0	0	0	0	0	0	0	0	0	0	0	0	0	0	0	0	0	0	0	0	5459	0	0	0	0	0	0
	Barb7_.spp	0	166	0	0	0	0	0	0	0	0	88	0	126	38	368	0	0	97	0	369	0	858	97	0	0	0	0	0	0	0	0	0	0	2280	0	0	0	595	38	208	0	463	0	0	0	88	9	0
	Phocaeicola_paurosaccharolyticus	0	68	0	0	0	0	0	0	0	0	222	0	239	98	312	0	0	150	0	632	0	241	192	476	0	0	0	0	0	0	0	0	0	272	0	0	55	1312	110	892	0	198	0	0	0	1189	1829	0
	Mediterraneibacter_cottocaccae	0	0	0	0	0	0	0	0	0	0	0	0	0	0	0	0	0	0	0	0	0	73	36	0	0	0	0	0	0	0	0	0	0	0	0	0	0	0	0	0	0	0	0	0	0	394	0	0
	Phocaeicola_caecigallinarum_A	0	0	0	0	0	0	0	0	0	0	34	0	270	0	221	0	0	0	0	223	0	152	135	102	0	0	0	0	0	0	0	0	0	119	0	0	0	1093	51	484	0	0	0	0	0	239	204	0
	Phocaeicola_barnesiae	0	0	0	0	0	0	0	0	0	0	79	0	541	0	202	0	0	0	0	40	0	0	195	244	0	0	0	0	0	0	0	0	0	241	0	0	0	3248	0	853	0	0	0	0	0	1034	277	0
	Romboutsia_C_hominis	0	0	0	0	0	0	0	0	0	0	0	0	0	0	0	0	0	0	0	0	0	0	0	0	0	0	0	0	0	0	0	0	0	0	0	0	0	0	0	0	0	0	0	0	0	0	0	0
	Phocaeicola_faecipullorum_A	0	0	0	0	0	0	0	0	0	0	306	0	470	0	381	0	0	0	0	679	0	584	48	713	0	0	0	0	0	0	0	0	0	766	0	0	0	2451	187	1579	0	70	0	0	0	541	665	0
	Muricomes_contortus_C	0	0	0	0	0	0	0	0	0	0	0	0	0	0	0	0	0	0	0	0	0	0	0	0	0	0	0	0	0	161	0	0	0	0	0	0	0	36	0	0	0	0	0	0	0	130	0	0
	Erysipelatoclostridium_cocleatum	0	0	0	2369	0	0	0	0	0	754	0	0	0	0	0	0	0	0	0	0	0	0	0	0	0	0	0	0	0	752	774	0	0	0	0	0	1061	0	35	0	0	242	0	0	0	35	691	0
	Terrisporobacter_mayombei	0	0	0	0	0	0	0	0	0	0	0	0	0	0	0	0	0	0	0	0	0	0	0	0	0	0	0	0	0	0	0	0	0	0	0	0	0	0	0	0	0	0	0	0	0	0	0	0
	Clostridium_thermobutyricum	848	0	0	0	0	1349	0	0	0	0	0	0	0	0	0	0	0	0	0	0	0	0	348	0	39990	0	0	0	0	0	0	0	0	0	0	0	0	0	0	0	0	0	0	0	0	0	0	0
	Intestinibacter_.spp	0	0	0	0	0	0	0	0	0	0	0	0	0	0	0	90	0	0	0	0	0	218	0	0	0	0	0	0	0	0	0	0	0	0	0	0	0	0	0	0	0	0	0	0	0	1440	0	0
	Phocaeicola_abscessus	0	0	0	0	0	0	0	0	0	0	30	0	79	0	79	0	0	0	0	148	0	128	19	0	0	0	0	0	0	0	0	0	0	246	0	0	0	325	0	170	0	40	0	0	0	208	291	0
	Schaedlerella_glycyrrhizinilytica_A	0	0	0	0	0	0	0	0	0	0	0	0	0	0	0	0	0	2026	0	0	0	422	1890	0	0	0	0	0	0	115	0	0	0	0	0	0	0	0	0	0	0	0	0	0	0	56324	423	0
[truncated: 67 more columns]

## Sheet: genus
SampleID	elcho01	elcho02	elcho03	elcho04	elcho05	elcho06	elcho07	elcho08	elcho09	elcho10	elcho11	elcho12	elcho13	elcho14	elcho15	elcho16	elcho17	elcho18	elcho19	elcho20	elcho21	elcho22	elcho23	elcho24	elcho25	elcho26	elcho27	elcho28	elcho29	elcho30	elcho31	elcho32	elcho33	elcho34	elcho35	elcho36	elcho37	elcho38	elcho39	elcho40	elcho41	elcho42	elcho43	elcho44	elcho45	elcho46	elcho47	elcho48	elcho49
Study	elcho	elcho	elcho	elcho	elcho	elcho	elcho	elcho	elcho	elcho	elcho	elcho	elcho	elcho	elcho	elcho	elcho	elcho	elcho	elcho	elcho	elcho	elcho	elcho	elcho	elcho	elcho	elcho	elcho	elcho	elcho	elcho	elcho	elcho	elcho	elcho	elcho	elcho	elcho	elcho	elcho	elcho	elcho	elcho	elcho	elcho	elcho	elcho	elcho
Age_days	35	35	56	60	100	149	164	166	214	217	245	279	308	311	332	356	367	405	436	441	549	571	594	617	22	47	118	147	160	205	228	240	250	285	329	333	346	374	380	382	431	462	463	476	476	511	511	537	566
Age_cat	age0	age0	age0	age0	age0	age0	age1	age1	age1	age1	age1	age1	age2	age2	age2	age2	age2	age2	age2	age2	age3	age3	age3	age3	age0	age0	age0	age0	age1	age1	age1	age1	age1	age1	age2	age2	age2	age2	age2	age2	age2	age3	age3	age3	age3	age3	age3	age3	age3
Sex	F	F	F	F	F	F	F	F	F	F	F	F	F	F	F	F	F	F	F	F	F	F	F	F	M	M	M	M	M	M	M	M	M	M	M	M	M	M	M	M	M	M	M	M	M	M	M	M	M
																					ELCHO
genus	elcho01	elcho02	elcho03	elcho04	elcho05	elcho06	elcho07	elcho08	elcho09	elcho10	elcho11	elcho12	elcho13	elcho14	elcho15	elcho16	elcho17	elcho18	elcho19	elcho20	elcho21	elcho22	elcho23	elcho24	elcho25	elcho26	elcho27	elcho28	elcho29	elcho30	elcho31	elcho32	elcho33	elcho34	elcho35	elcho36	elcho37	elcho38	elcho39	elcho40	elcho41	elcho42	elcho43	elcho44	elcho45	elcho46	elcho47	elcho48	elcho49
Megasphaera	0	2388860	0	118285	0	602	0	3364	418165	1688102	0	17132	1291998	0	61126	612188	423855	239138	0	48551	238647	0	23	913631	0	0	0	1588319	0	2889350	400846	102719	264447	0	0	361743	325907	0	4040	775852	3629466	0	1016783	5092496	1897246	134542	13203	16460	93256
Caecibacter	0	10917	0	84033	0	0	0	0	1395	123432	0	0	64848	0	73707	75023	8773	10299	0	0	6685	2069	21373	3695	0	0	0	5319	0	175172	55454	0	7973	0	0	1087	31022	0	10169	118716	40711	1535	12302	19970	20045	264	39	0	13475
Parolsenella	0	1399899	0	0	0	30523	0	0	4388120	980799	0	32562	482998	380	686039	1533300	239434	304378	0	1907	295675	4128	75623	999709	0	0	0	429027	1139379	0	0	0	0	0	2509	146422	8381	4413	0	86726	423985	0	54861	0	0	0	0	1008	24624
Prevotella	0	1026793	9184	0	5729	0	0	0	2507	5914	7107548	160874	2130821	4076797	67743	8574	226985	4000885	739559	5651903	2173487	1890432	2338120	0	0	0	6241	0	0	201842	70450	67431	1647	6266	0	99471	515560	4757138	6097184	1082045	1045082	32245	8918225	855	71854	311534	136804	6608872	7713948
Intestinibacter	0	0	0	0	0	0	0	0	0	10484	0	0	869	0	0	10463	2408	0	0	0	0	4482	0	0	0	0	0	0	0	3563	0	0	1127	0	0	0	0	1620	0	0	0	0	459	0	0	23984	2519	0	0
Allisonella	0	0	0	666	0	0	1127	0	6566	8054	0	0	353	0	241	5278	0	1837	0	0	2407	3435	0	0	0	0	0	7086	0	0	30677	30479	764	0	0	1688	0	0	9020	6030	28375	0	5022	0	12668	0	0	0	2177
Sellimonas	0	0	0	57241	0	0	0	0	0	0	186	0	189	172	0	99	0	0	12	0	0	149	468	0	0	0	0	0	0	364	0	0	0	0	0	100	89	194	25	0	0	187	0	0	0	43016	22824	0	0
Ruminococcus	0	21930	0	116378	0	0	0	0	0	84849	21745	0	45392	26609	19052	0	0	0	1586	69060	6827	35535	1246	4697	0	0	0	0	0	147027	25852	0	0	0	0	43873	1263	77701	98435	0	0	216981	0	10283	8675	7649	19697	0	7614
Dialister	0	120664	0	25866	0	0	315	0	733	483	0	3180	111306	58180	13182	25863	29961	166919	164393	49102	120504	102349	97997	0	0	0	0	0	0	203293	1176	0	22869	0	0	51610	0	37354	268581	169849	352363	30994	120098	296	11220	2217	13323	80284	125986
Romboutsia	0	0	0	0	0	0	0	0	0	0	0	0	0	0	0	0	0	0	0	0	0	0	0	88	0	0	0	0	0	0	0	0	0	0	0	0	0	0	0	0	0	0	0	0	0	0	0	0	0
Alloscardovia	1049	800	81	363	1723	882	890	146	868	1950	0	144	188	0	833	1323	162	793	0	0	601	0	0	471	0	723	1969	1138	1522	518	266	267	363	0	657	65	889	32	71	24	2538	0	191	499	406	280	216	0	64
Faecalimonas	0	0	0	0	0	0	0	0	0	0	0	0	0	0	0	0	0	359	0	0	0	0	113	45050	0	0	0	0	0	140737	0	0	0	0	0	0	0	0	0	0	0	0	0	311	18329	208	0	0	0
Thermophilibacter	0	1261	0	0	0	0	0	0	2134	1189	0	0	2783	0	506	2046	1902	835	0	0	391	0	2393	1283	0	0	0	57	930	0	0	0	0	0	0	0	0	108	0	38	1230	0	27	0	0	0	0	0	212
Muricomes	0	0	0	0	0	0	0	0	0	0	0	0	0	191	1555	0	464	0	0	0	0	55	165	0	0	0	0	0	0	161	0	0	0	0	0	0	14906	36	357	0	0	0	0	0	0	1260	0	0	0
Clostridium	137309	0	0	112925	0	224891	14534	22003	110661	54382	830	0	10687	25724	1596	6719	17019	0	4817	1574	0	10884	71550	17708	6638924	0	0	0	0	61121	0	4050	38152	0	0	52589	32778	950	6560	0	7046	45816	1420	0	540	40923	18242	3020	5137
Paratractidigestivibacter	0	3536	0	0	0	234	0	0	214	119	0	0	32359	0	140	532	29112	5555	0	1604	970	0	52272	23	0	0	0	0	23	0	0	0	0	0	0	0	0	4109	0	0	11738	0	3108	0	0	0	0	3355	8225
Ventrimonas	0	0	0	0	0	0	0	0	0	0	0	0	0	14400	0	0	0	0	139	0	0	0	2749	0	410	0	0	0	0	0	0	0	0	0	0	250	0	1676	829	0	0	11191	0	0	0	179	0	0	163
UBA9414	0	0	0	0	0	0	0	0	0	0	330	0	326	437	0	93	0	0	0	0	0	199	563	0	0	0	0	0	0	778	0	0	0	0	0	16	0	252	181	0	0	252	0	0	30	406	0	0	0
Hespellia	0	0	0	45	0	0	0	0	0	0	359	0	274	408	0	167	0	0	241	14	0	301	556	0	0	0	0	0	0	226	0	0	0	0	0	373	0	225	149	0	0	452	0	0	89	542	44	0	0
Acidaminococcus	0	0	0	10883	0	0	0	0	0	43817	0	0	13633	0	117289	380720	101060	4187	0	0	467	0	0	0	0	0	0	0	0	7748	284664	10122	75294	0	0	7744	3295	0	0	198487	38883	286	4275	0	130794	0	0	0	441
UBA7748	0	175	0	0	0	0	0	0	294	270	0	0	210	0	199	535	127	222	0	0	153	0	103	58	0	0	0	0	105	0	0	0	0	0	0	0	23	0	0	46	186	0	23	0	0	0	0	0	0
Erysipelatoclostridium	0	725	0	9941	0	0	0	0	0	31346	0	0	0	0	166	14916	943	53	0	0	0	0	0	13070	0	0	0	0	0	31437	33629	0	4550	0	0	4326	36873	1522	3788	0	0	19067	0	8248	10439	7803	12540	0	0
Olsenella	0	967	0	0	0	0	0	0	4445	5108	0	0	1218	0	9559	4066	397	772	0	0	283	0	629	389	0	0	0	179	247	0	1205	0	0	0	0	0	0	0	0	2120	399	0	0	0	0	0	0	0	47
Aeriscardovia	420	287	17	130	222	219	116	35	186	542	0	0	70	0	300	287	44	322	0	0	297	0	0	123	0	312	296	302	197	201	71	97	53	0	45	0	211	17	0	0	710	0	43	184	44	44	17	0	0
Coriobacterium	0	244	0	0	0	43	0	0	205	8	0	0	126	0	154	942	101	712	0	0	151	0	84	0	0	0	0	0	0	181	0	0	17	0	0	0	77	51	25	0	17	0	0	0	0	0	0	0	152
Faecalibacillus	0	0	0	0	0	0	0	0	0	0	0	0	0	6721	8305	0	1929	0	713	0	0	0	0	0	0	0	0	0	0	0	0	0	0	0	0	0	0	2223	5828	0	0	0	0	0	0	0	0	0	0
Collinsella	0	85820	0	13804	0	74732	10530	0	26600	0	15742	1233	52081	4932	46666	589045	66840	504290	3224	14427	101538	7416	71092	0	0	0	0	0	0	420331	63285	0	111045	0	16941	0	120201	85905	111475	34604	26041	9731	36385	0	0	111371	20422	3982	182217
Galliscardovia	0	857	0	663	1182	647	1113	0	638	1827	0	185	218	0	1195	1781	134	678	0	0	275	0	0	548	0	285	1547	1148	987	150	398	268	165	0	50	0	731	0	0	0	1638	0	164	284	299	186	182	0	0
Streptococcus	617627	253438	4017970	13386	161638	254950	1112457	31685	266034	58614	579	318794	52728	17464	21568	201566	9285	28306	991	1557	9765	14857	34517	40249	266255	109643	946774	102333	89625	76715	19577	1053054	100270	11996	50691	53937	17685	0	9853	1042	189523	25	30067	1284609	116532	2434	0	2679	11943
Parascardovia	5275	1941	328	880	2526	2338	2357	434	1816	4049	0	564	861	0	1653	2938	334	1636	0	0	1047	0	20	1498	0	4873	4389	2359	3116	1571	834	653	812	0	2027	160	2430	40	200	130	3808	0	554	1179	820	489	375	0	240
Lachnospira	0	0	0	0	0	0	0	0	0	0	736	0	18059	46844	5105	10793	2847	117	22070	52030	0	4183	150796	0	0	0	0	0	0	0	0	0	0	0	0	1194011	0	0	67229	0	0	127043	0	0	2325	0	0	775	490
Anaerostipes	0	2373	0	0	0	0	0	0	0	0	6041	0	23410	8468	43893	9217	1671	18715	1552	3479	2448	8426	80894	0	0	0	0	0	0	6697	0	0	0	0	0	164873	0	86544	52994	0	1459	12744	4505	49190	38062	81253	130351	0	45634
Bifidobacterium	6041602	1859550	3066228	1925607	10273020	3526699	4128753	1811043	3834196	6043741	12208	893992	803745	1268	1815835	3816421	440752	1567224	18500	51049	1284374	73409	113738	2128118	41946	7333521	7731171	6177543	7547808	3163192	1743306	2100789	1550351	114967	8098677	240408	4600677	403508	361705	356217	4558183	75559	480269	1733161	1237594	1210814	499515	4797	218905
Pseudoscardovia	4000	4374	1204	2278	8378	5460	6236	167	4089	11119	0	1702	1852	0	5308	8401	1029	4067	0	0	2013	0	139	2946	0	2711	10000	7026	6543	2177	2424	2057	1680	0	1399	228	4791	282	702	727	9506	0	1737	3256	1695	1584	1478	0	301
unknown	0	1964	361	0	210	0	0	0	594	120	286	135	1805	1452	1006	399	209	266	298	2366	2224	4053	4417	371	0	170	0	87	265	0	0	0	0	15307	0	39	36	4356	66	373	179	11197	852	0	0	549	2484	0	951
Dorea	0	21015	0	0	0	0	0	0	56566	40956	28093	0	148357	39303	32459	394605	29274	53842	21375	41045	45167	20975	176690	28560	0	0	0	0	0	41773	67187	0	176463	0	0	21161	115982	34804	53121	0	24343	20525	57602	156996	15528	203338	5664	5267	24988
OM05-12	0	2033	0	34	0	0	0	766	0	0	3723	0	3622	886	4764	0	661	1572	529	6381	0	4470	3235	9457	0	0	0	0	0	0	100	0	0	2853	0	170	3198	9858	2435	11028	0	2593	0	0	0	6416	5168	0	0
Schaedlerella	0	1467	0	274	0	0	0	0	0	347	5786	0	5954	3823	183	2363	0	2308	472	719	2311	6041	7626	0	0	0	0	0	0	1726	213	0	0	0	0	693	77	2716	2148	0	200	7788	2537	0	4417	60894	783	0	715
non-sig
UBA7741	0	1031	0	0	0	0	0	0	3831	748	0	0	666	0	402	1460	316	296	0	0	309	0	138	543	0	0	0	165	496	0	0	0	0	0	0	55	0	0	0	110	313	0	0	0	0	0	0	0	0
Senegalimassilia	0	24647	0	0	0	0	0	0	0	0	0	0	9955	625	25990	0	0	3223	0	0	2665	5003	1133	0	0	0	0	626	0	0	13824	0	0	0	0	7674	0	6538	0	0	30293	0	9877	0	0	0	0	0	817
Limicola	0	165	0	0	0	0	0	0	55	0	0	0	120	0	66	613	11	587	0	0	131	0	88	0	0	0	0	0	0	122	0	0	33	0	0	0	0	44	0	0	0	0	0	0	0	0	0	0	65
UBA4372	0	0	0	0	0	0	0	0	0	0	280	0	236	417	0	0	0	407	0	25	51	63	0	0	0	0	0	0	0	0	0	0	0	0	0	0	0	306	51	0	0	0	305	0	0	0	0	827	1176
Parafannyhessea	0	497	0	0	0	0	0	0	1639	394	0	0	1132	0	733	2167	255	932	0	0	257	0	620	103	0	0	0	0	156	0	0	0	0	0	0	0	0	0	0	0	434	0	0	0	0	0	0	0	131
Coprousia	0	381	0	0	0	0	0	0	79	0	0	0	147	0	131	1733	184	1693	0	0	269	0	116	0	0	0	0	0	0	505	0	0	0	0	0	0	107	0	0	0	0	0	0	0	0	13	0	0	162
Rothia	289045	17012	688677	0	40532	155	30484	1285	0	299	0	6289	0	0	0	0	0	0	0	0	0	0	0	0	39051	57480	196319	9782	1095	0	0	16077	14124	1697	146	0	0	0	0	0	15228	0	0	41023	896	0	0	0	0
Duodenibacillus	0	0	0	0	0	0	0	0	0	0	11516	0	0	2718	1275	0	50550	0	7338	0	4834	514	643	0	0	0	0	0	0	0	0	0	0	0	0	728218	18313	12077	0	45996	52624	52934	1666	0	0	0	0	13823	20471
Mesosutterella	0	0	0	10819	0	0	0	48303	142205	84610	0	67541	0	0	0	361907	0	0	0	0	0	0	0	160475	0	0	0	3018	0	2617	143933	149227	101477	0	0	0	0	0	13016	0	24527	0	0	18354	653886	0	0	0	0
Holdemanella	0	0	0	0	0	0	0	0	0	0	87679	0	0	71547	0	0	0	4483	5242	50333	33444	91962	32134	0	0	0	0	0	0	0	0	0	0	0	0	0	0	56308	0	6547	33682	0	13119	135602	43466	0	0	4914	7592
Anaerotignum	0	0	0	0	0	0	0	0	0	0	12813	0	0	18643	7803	0	35774	0	3041	4890	20260	0	14889	0	0	0	0	0	0	0	0	0	0	0	0	0	0	18355	20948	0	0	28256	0	0	0	0	916	0	24205
CACZQA01	0	64	0	0	0	0	0	0	428	74	0	0	56	0	9	292	89	56	0	0	18	0	0	64	0	0	0	0	0	0	0	0	0	0	0	0	0	0	0	0	73	0	0	0	0	0	0	0	0
Catenibacterium	0	15021	0	0	0	0	0	0	0	0	71372	0	23440	125976	0	0	0	58618	0	7097	1631	0	10070	0	0	0	0	0	0	0	0	0	0	0	0	0	0	33293	0	0	27090	0	47211	0	0	0	0	2610	14344
Alloprevotella	0	0	0	0	0	0	0	0	0	0	114	0	193	217964	0	0	801	55751	0	114	9304	208	0	0	0	0	0	0	0	0	0	0	0	0	0	12908	0	144	16	49	1508	0	206939	0	0	170	16	266452	634678
Ligilactobacillus	0	94732	0	36428	0	0	0	0	0	0	0	0	209914	0	0	0	3559	578	0	0	1649	0	0	17271	0	0	0	0	0	0	0	23	0	0	0	0	0	0	420	0	0	0	0	0	13139	0	0	4263	1216
Mitsuokella	0	0	0	109	0	0	0	0	0	0	0	0	0	0	1308	0	28382	2891	0	81	7596	0	0	0	0	0	0	0	0	0	0	0	0	0	0	0	0	0	133819	144451	59533	0	2386	0	0	0	0	46491	5961
Cryptobacteroides	0	3162	0	0	0	0	0	0	0	0	192817	0	0	1471521	4843772	0	0	626231	0	0	899109	124533	43936	0	0	0	0	0	0	0	0	0	0	0	0	0	0	0	0	0	9065	0	141252	0	0	0	0	47689	8414
Limosilactobacillus	0	0	0	12799	0	78943	0	0	128233	283950	0	330151	0	0	0	0	0	0	0	0	0	0	0	2074	0	0	0	0	0	4631	0	473255	4897	0	2591	0	0	0	238	0	0	0	84	17969	610502	0	0	0	1385
UBA3839	0	0	0	0	0	0	0	0	0	0	40	0	0	40	0	0	0	111	0	0	0	0	0	0	0	0	0	0	0	0	0	0	0	0	0	0	0	26	40	0	0	0	40	0	0	0	0	56	125
Copromorpha	0	0	0	0	0	0	0	0	0	0	0	0	2337	2169	8581	5031	0	8685	0	139	28	8132	0	0	0	0	0	0	0	0	0	0	0	0	0	0	1177	2012	308	0	0	0	191	0	0	523	322	0	1867
Slackia	0	0	0	0	0	0	0	0	175	61	0	2072	350	0	1377	48	0	0	0	0	0	0	5655	0	0	0	0	0	0	12	0	0	0	0	0	0	0	0	5314	0	2183	0	4171	0	0	0	0	0	654
Anaeroglobus	0	1804	0	26	0	863376	0	0	1483	2602	0	0	829	0	105	1002	0	78	0	0	0	0	0	79	0	0	0	7003	0	3740	175	0	26	0	0	10558	761	0	0	1751	3727	0	315	631	58998	0	0	0	0
Anaerofilum	0	0	0	0	0	0	0	0	0	0	63	0	0	141	0	0	0	0	15	0	0	470	109	0	0	0	0	0	0	0	0	0	0	0	0	0	141	223	47	0	0	47	0	0	15	109	0	0	0
Faecousia	0	0	0	0	0	0	0	0	0	0	5583	0	0	15687	0	0	0	0	1217	0	2277	36051	4775	0	0	0	0	0	0	0	0	0	0	0	0	0	0	20380	0	0	0	4884	0	0	0	0	1923	0	0
Floccifex	0	0	0	0	0	0	0	0	0	0	244	0	0	204	0	0	0	0	0	104	0	259	52	0	0	0	0	0	0	0	0	0	0	0	0	0	0	115	0	0	0	0	0	317	44	0	0	0	0
Lancefieldella	4177	109	103862	0	822	0	706	0	0	0	0	110	0	0	0	0	0	0	0	0	0	0	0	0	729	7168	23057	253	1866	0	0	733	102	0	0	0	0	0	0	0	0	0	0	4606	1188	0	0	0	0
Alangreenwoodia	0	0	0	0	0	0	0	0	0	0	6270	0	0	0	1404	0	0	7852	2267	0	0	10882	0	0	0	0	0	0	0	0	0	0	0	0	0	0	0	7489	0	0	0	0	0	0	0	545	0	0	0
Enorma	0	0	0	0	0	0	0	0	0	0	0	0	55	0	0	2771	0	1578	0	0	405	0	272	0	0	0	0	0	0	0	0	0	0	0	0	0	0	0	0	0	0	0	0	0	0	0	0	0	164
Fimenecus	0	0	0	0	0	0	0	0	0	0	110	0	250007	26620	0	0	0	533368	32230	97155	20564	314175	475314	0	0	0	0	0	0	0	0	0	0	0	0	0	0	60671	0	0	9247	679480	0	0	0	0	0	85408	457649
UBA1417	0	0	0	0	0	0	0	0	0	0	2999	0	0	49239	20951	0	0	0	31787	1570	412	87851	535	0	0	0	0	0	0	0	0	0	0	0	0	0	0	12398	6845	0	0	89449	0	0	0	37791	15286	506	6670
Gemmiger	0	16	0	0	0	0	0	0	0	0	7612	0	104999	29077	39187	48	0	67184	84702	40724	38398	24053	49817	0	0	0	0	0	0	0	0	0	0	0	0	0	192	205694	109876	0	1724	159624	16379	0	97	87408	95313	0	49058
CAG-238	0	0	0	0	0	0	0	0	0	0	44475	0	0	17632	21962	0	0	0	4934	0	1213	8758	0	0	0	0	0	0	0	0	0	0	0	0	0	0	0	0	0	0	0	3383	0	0	0	0	0	0	0
Odoribacter	0	7558	0	0	0	0	0	0	0	0	48365	0	118505	116139	438606	0	0	72466	2784	0	1691	560738	14446	0	0	0	0	0	0	0	0	0	0	0	0	0	0	0	0	1967279	0	0	6395	0	0	26356	53480	1493	0
Nanogingivalis	11914	614	4012	0	17863	0	8142	0	0	0	0	0	0	0	0	124	0	0	0	0	0	0	0	0	0	0	79605	0	0	0	0	2310	2058	0	0	47	1014	0	0	0	0	0	0	0	0	0	0	0	0
CAIFEU01	0	55	0	0	0	0	0	0	167	0	0	0	0	0	55	27	0	136	0	0	0	0	0	0	0	0	0	0	0	0	0	0	0	0	0	0	0	0	0	0	82	0	0	0	0	0	0	0	0
UBA4334	0	0	0	0	0	0	0	0	0	0	0	0	0	85	0	0	0	84	0	0	0	0	0	0	0	0	0	0	0	0	0	0	0	0	0	0	0	65	0	0	0	0	42	0	0	0	0	43	106
Merdisoma	0	0	0	0	0	0	0	0	0	0	7839	0	0	1874	0	0	0	0	0	0	0	3837	12399	0	0	0	0	0	0	0	0	0	0	0	0	0	0	67	2112	0	0	0	0	0	0	0	0	0	0
Evtepia	0	0	0	0	0	0	0	0	0	0	545	0	0	2675	8849	0	1821	0	0	0	0	17287	2082	0	0	0	0	0	0	1797	0	0	0	0	0	0	0	5433	0	0	0	2421	0	0	0	4454	7504	0	1885
Ventrenecus	0	0	0	0	0	0	0	0	0	0	2377	0	0	45	0	0	0	0	17124	0	0	22006	0	0	0	0	0	0	0	0	0	0	0	0	0	0	0	843	0	0	0	35223	0	0	0	0	0	0	0
Heteroscilispira	0	0	0	0	0	0	0	0	0	0	9	0	0	214	0	0	0	0	0	0	0	106	0	0	0	0	0	0	0	0	0	0	0	0	0	0	0	0	0	0	0	107	0	0	0	0	0	0	0
CAG-83	0	0	0	0	0	0	0	0	0	0	175673	0	0	260094	81146	0	2692	0	487539	0	139270	390427	21911	0	0	0	0	0	0	0	0	0	0	0	0	0	0	353856	89873	0	0	625437	0	0	0	13318	0	0	41710
Bulleidia	0	0	0	0	0	0	0	0	0	0	0	0	0	13879	1983	0	0	0	0	1239	1167	0	0	0	0	0	0	0	0	0	0	0	0	0	0	0	0	15351	0	0	0	0	0	0	0	0	0	0	0
Desulfovibrio	0	0	0	0	0	0	0	0	0	2365	0	0	0	14302	1996	15293	0	0	0	0	14563	72285	0	0	0	0	0	0	0	0	0	0	0	0	0	0	0	0	0	25948	0	16798	0	0	1083	0	0	0	0
Limisoma	0	28141	0	0	0	0	0	0	0	0	382076	0	143645	0	0	0	0	380246	0	0	15999	0	0	0	0	0	0	0	0	0	0	0	0	0	0	0	0	0	0	0	0	0	43401	0	0	0	0	17105	80084
Kandleria	0	0	0	0	0	0	0	0	0	0	221	0	0	793	0	0	0	181	0	0	0	0	0	0	0	0	0	0	0	0	0	0	0	0	0	0	0	109	0	0	0	0	182	0	0	0	0	0	0
Christensenella	0	0	0	0	0	0	0	0	0	114	0	0	0	0	630	0	0	114	0	0	0	1276	0	0	0	0	0	0	0	0	0	0	0	0	0	0	0	2312	0	0	0	0	0	0	3521	2509	583	0	0
UMGS2037	0	0	0	0	0	0	0	0	0	0	174683	0	0	161	0	0	0	0	35767	0	0	0	0	0	0	0	0	0	0	136	0	0	0	0	0	0	0	0	0	0	0	26	0	0	0	0	0	0	0
Oxalobacter	0	0	0	0	0	0	0	0	0	0	0	0	0	4432	0	0	0	0	0	67	0	457	2345	0	0	0	0	0	0	0	0	0	0	0	0	0	0	0	0	0	0	0	0	0	0	0	0	0	0
NSJ-62	0	0	0	0	0	0	0	0	0	0	196	0	0	412	0	0	0	0	169	0	0	303	0	0	0	0	0	0	0	0	0	0	0	0	0	0	0	272	0	0	0	299	0	0	0	198	284	0	0
CAG-449	0	0	0	0	0	0	0	0	0	0	1707	0	0	5237	0	0	0	0	2692	0	0	562	0	0	0	0	0	0	0	0	0	0	0	0	0	0	0	0	0	0	0	0	0	0	0	0	0	0	0
Onthousia	0	0	0	0	0	0	0	0	0	0	426	0	0	16163	0	0	0	0	0	0	908	0	6935	0	0	0	0	0	0	0	0	0	0	0	0	0	0	0	0	0	0	0	0	0	0	0	0	0	0
CAG-103	0	0	0	0	0	0	0	0	0	0	86842	0	0	33096	38056	0	0	0	472	0	0	1494	0	0	0	0	0	0	0	0	0	0	0	0	0	0	0	0	0	0	0	108401	0	0	0	0	568	0	0
Intestinibacillus	0	0	0	0	0	0	0	0	0	0	0	0	0	26	0	0	0	0	0	0	0	113	0	0	0	0	0	0	0	0	0	0	0	0	0	0	0	0	0	0	0	52	0	0	0	598	0	0	0
Ellagibacter	0	0	0	0	0	0	0	0	0	0	0	0	320	740	981	0	0	0	0	0	0	0	0	0	0	0	0	0	0	0	0	0	0	0	0	0	0	0	0	0	6285	0	4126	0	0	0	0	0	0
Limivivens	0	0	0	0	0	0	0	0	0	0	790	0	0	2299	0	0	538	0	0	0	0	0	0	0	0	0	0	0	0	1180	0	0	0	0	0	0	0	4859	2930	0	0	6634	0	0	0	0	0	0	0
UBA2897	0	0	0	0	0	0	0	0	0	0	0	0	0	0	0	0	49	0	0	0	0	0	0	0	0	0	0	0	0	0	0	0	0	0	0	0	0	0	984	1655	1457	0	0	0	0	0	0	676	0
Succinivibrio	0	0	0	0	0	0	0	0	0	0	0	0	0	5982	0	0	0	0	0	0	0	125348	0	0	0	0	0	0	0	0	0	0	0	0	0	0	0	2289	0	0	0	0	356	0	0	0	0	51473	214683
ER4	0	0	0	0	0	0	0	0	0	0	161553	0	0	392568	0	0	0	0	176784	0	77548	436284	15573	0	0	0	0	0	0	0	0	0	0	0	0	0	0	57183	0	0	0	91650	0	0	0	0	0	0	13865
CAG-302	0	0	0	0	0	0	0	0	0	0	0	0	0	49317	0	0	0	0	10742	0	17883	150699	0	0	0	0	0	0	0	0	0	0	0	0	0	0	0	0	0	0	0	0	0	0	0	0	0	0	0
Ventricola	0	0	0	0	0	0	0	0	0	0	1157	0	0	2530	0	0	0	0	958	0	0	3084	0	0	0	0	0	0	0	0	0	0	0	0	0	0	0	0	0	0	0	0	0	0	0	0	0	0	0
Neoruminococcus	0	0	0	0	0	0	0	0	0	0	16	0	0	122	0	0	0	0	16	0	0	173	0	0	0	0	0	0	0	0	0	0	0	0	0	0	0	171	0	0	0	189	0	0	0	0	0	0	0
Butyrivibrio	0	0	0	0	0	0	0	0	0	0	0	0	0	115468	0	0	0	0	0	0	0	60351	0	0	0	0	0	0	0	0	0	0	0	0	0	0	0	20879	37	0	0	15	0	0	0	0	0	0	0
Pseudoscilispira	0	0	0	0	0	0	0	0	0	0	586	0	0	315	0	0	0	0	784	0	106	2193	21	0	0	0	0	0	0	0	0	0	0	0	0	0	0	247	0	0	0	330	0	0	0	6702	85	0	75
Angelakisella	0	0	0	0	0	0	0	0	0	0	7754	0	0	0	0	0	86146	0	6807	0	0	0	0	0	0	0	0	0	0	0	0	0	0	0	0	0	0	51997	0	0	0	0	0	0	0	0	0	0	0
CAJFPI01	0	0	0	0	0	0	0	0	0	0	0	0	0	248	0	0	0	0	0	0	0	50	0	0	0	0	0	0	0	0	0	0	0	0	0	0	0	0	0	0	0	98	0	0	0	0	0	0	0
Pyramidobacter	0	0	0	0	0	0	0	0	0	0	0	0	0	0	4240	0	0	0	0	0	0	0	0	0	0	0	0	0	0	0	0	0	0	0	0	0	0	0	0	42317	0	29313	0	0	1968	0	0	0	0
Agathobaculum	0	1722	0	0	0	0	0	0	0	0	4445	0	31926	15058	1933	0	1697	10830	2956	3468	457	1173	29505	0	0	0	0	0	0	0	0	0	0	0	0	13143	44597	7257	25930	0	1132	23833	1241	0	0	39161	5216	0	745
Bilophila	0	0	0	0	0	0	0	0	0	0	19156	0	0	8868	7032	0	0	6338	2815	20688	4031	19376	8242	24719	0	0	0	0	0	0	32431	0	0	0	0	0	29395	0	7265	0	0	0	0	0	0	3273	340	0	10192
Oscillibacter	0	0	0	0	0	0	0	0	0	0	0	0	0	189	0	0	0	0	0	0	0	162	0	0	0	0	0	0	0	0	0	0	0	0	0	0	0	0	0	0	0	54	0	0	0	0	134	0	0
Dysosmobacter	0	0	0	0	0	0	0	0	0	0	100638	0	0	69019	0	0	240	0	9428	16185	19611	105731	9772	6882	0	0	0	0	0	0	0	0	0	0	0	0	0	39924	0	0	0	44014	0	0	0	118054	126195	2864	18496
CAG-177	0	0	0	0	0	0	0	0	0	0	0	0	0	0	166339	0	0	0	0	0	351909	20823	0	0	0	0	0	0	0	0	0	0	0	0	0	0	0	29021	0	0	0	0	0	0	0	0	0	0	0
Coprococcus	0	0	0	0	0	0	0	0	0	0	3328	0	0	1825	0	0	0	0	160347	488	758	32751	16106	0	0	0	0	0	0	0	0	0	0	0	0	0	0	24450	7033	0	0	4670	0	0	0	0	0	0	0
UBA4644	0	0	0	0	0	0	0	0	0	0	107	0	0	879	0	0	0	0	0	0	0	189	0	0	0	0	0	0	0	0	0	0	0	0	0	0	0	0	0	0	0	0	0	0	0	0	0	0	0
Escherichia	365	942389	681480	138535	553779	21	1273009	198643	1285436	404833	0	294142	632790	0	5520	484760	515466	310460	16757	100482	1523	50803	992	194864	1065056	11215	1435952	1127188	3764	167167	1764739	1441647	2196630	2897618	118986	350070	186847	40836	100960	955362	73367	0	12816	2075973	106611	88627	0	0	598349
VUNA01	0	0	0	0	0	0	0	0	0	0	0	0	0	0	19697	0	0	8338	0	0	2524	0	0	0	0	0	0	0	0	0	0	0	0	0	0	0	0	0	0	0	0	0	0	0	0	0	0	0	2342
Selenomonas	0	0	0	0	0	0	0	0	0	0	0	0	0	0	0	0	0	0	0	0	0	0	0	0	0	0	0	0	0	0	0	0	0	0	0	0	0	0	981	1602	378	0	0	0	0	0	0	38	0
Avoscillospira	0	0	0	0	0	0	0	0	0	0	0	0	0	383	0	0	0	0	0	0	0	565	0	0	0	0	0	0	0	0	0	0	0	0	0	0	0	78	0	0	0	60	0	0	0	0	0	0	0
Pauljensenia	74951	0	12416	0	41811	2405	1995	0	948	1823	0	1819	0	0	0	2108	0	0	0	0	0	0	0	0	0	8723	64583	126	1418	0	0	0	1117	0	0	0	438	0	0	0	1261	0	0	2244	0	0	0	0	0
UBA7597	0	0	0	0	0	0	0	0	0	0	13079	0	0	23274	0	0	0	0	0	0	0	1594	0	0	0	0	0	0	0	0	0	0	0	0	0	0	0	0	0	0	0	0	0	0	0	0	0	0	0
Flemingibacterium	0	0	0	0	0	0	0	0	0	0	0	0	0	6880	0	0	0	0	0	0	0	1633	0	0	0	0	0	0	0	0	0	0	0	0	0	0	0	0	0	0	0	9736	0	0	0	0	0	0	0
Stercorousia	0	0	0	0	0	0	0	0	0	0	94350	0	0	53194	0	0	0	0	0	0	67793	0	0	0	0	0	0	0	0	0	0	0	0	0	0	0	0	36946	0	0	0	0	0	0	0	0	0	0	0
Mailhella	0	0	0	0	0	0	0	0	0	0	0	0	0	4559	0	0	50578	0	352	0	15322	0	0	0	0	0	0	0	0	0	0	0	0	0	0	0	0	0	0	0	0	0	0	0	0	0	0	0	8751
Akkermansia	0	0	0	0	0	0	0	0	0	0	121337	0	14849	15525	0	0	747997	0	10693	229	0	321170	25525	7000	0	0	0	73675	0	326842	0	0	294784	0	0	179588	1432	154196	3835	808775	61762	44223	0	0	0	580923	8718	0	0
CAG-245	0	0	0	0	0	0	0	0	0	0	0	0	0	0	0	0	0	0	22105	0	0	40287	0	0	0	0	0	0	0	0	0	0	0	0	0	0	0	2713	0	0	0	110	0	0	0	0	0	0	0
Bariatricus	0	0	0	0	0	0	0	0	0	0	106201	0	303	14285	0	0	0	0	2806	2929	0	26190	2722	0	0	0	0	0	0	1477	0	0	0	0	0	0	0	39104	22823	0	0	8849	0	0	12856	0	0	0	0
Rikenella	0	0	0	0	0	0	0	0	0	0	0	0	0	0	0	0	0	0	0	0	0	40	0	0	0	0	0	0	0	3235	0	0	0	0	0	0	0	0	0	0	0	13986	0	0	0	0	0	0	0
UBA1367	0	0	0	0	0	0	0	0	54	0	0	0	83	0	0	27	0	0	0	0	0	0	0	0	0	0	0	0	0	0	0	0	0	0	0	0	0	0	0	0	0	0	0	0	0	0	0	0	0
UMGS1375	0	0	0	0	0	0	0	0	0	0	8681	0	0	3184	0	0	0	0	0	0	0	0	0	0	0	0	0	0	0	0	0	0	0	0	0	0	0	0	0	0	0	8179	0	0	0	0	0	0	0
Phascolarctobacterium	0	0	0	0	0	0	0	0	0	0	199804	0	0	129936	0	0	0	0	80965	0	2859	0	3710	10145	0	0	0	0	0	0	0	0	0	1818	0	0	3831	0	0	18967	71	0	0	0	0	0	0	0	0
CAG-127	0	0	0	0	0	0	0	0	0	0	14982	0	0	66567	0	0	0	0	13234	0	1512	5097	0	0	0	0	0	0	0	0	0	0	0	0	0	0	0	0	0	0	0	0	0	0	0	0	0	0	0
UBA3796	0	0	0	0	0	0	0	0	0	0	0	0	0	0	0	0	0	0	0	0	0	0	0	0	0	0	0	0	0	0	0	0	0	0	0	0	0	0	202	327	99	0	0	0	0	0	0	0	0
CAG-194	0	0	0	0	0	0	0	0	0	0	0	0	0	12229	0	0	0	0	1944	0	0	0	0	0	0	0	0	0	0	0	0	0	0	0	0	0	0	0	0	0	0	9734	0	0	0	0	0	0	0
CAG-170	0	0	0	0	0	0	0	0	0	0	3577	0	0	109890	153962	0	2787	0	4410	0	3335	125427	0	0	0	0	0	0	0	0	0	0	0	0	0	0	0	0	0	0	0	0	0	0	0	0	0	0	0
Butyricimonas	0	0	0	0	0	0	0	0	0	0	0	0	0	3859	0	0	0	67353	0	0	95	10647	0	0	0	0	0	0	0	0	0	0	0	0	0	0	0	0	0	0	0	0	0	0	0	0	0	0	0
Fusobacterium	0	0	3668	0	0	468	0	0	0	0	0	0	0	0	0	1117	1335	0	0	0	0	0	0	0	0	0	0	9874	0	0	2983	9893	0	0	0	0	0	0	0	3289	57	0	0	11229	16292	750	0	0	0
HGM04593	0	0	0	0	0	0	0	0	0	0	12	0	0	0	0	0	0	49	0	0	0	0	0	0	0	0	0	0	0	0	0	0	0	0	0	0	0	24	0	0	0	0	0	0	0	0	0	0	111
Baileyella	0	0	0	0	0	0	0	0	0	0	0	0	0	0	0	4432	0	0	0	0	0	0	0	0	0	0	0	0	0	0	6266	0	0	0	0	0	0	0	0	1777	0	0	0	0	0	0	0	0	0
UMGS1901	0	0	0	0	0	0	0	0	0	0	0	0	0	706	0	0	0	0	0	0	0	363	0	0	0	0	0	0	0	0	0	0	0	0	0	0	0	0	0	0	0	0	0	0	0	0	0	0	0
Zag111	0	0	0	0	0	0	0	0	0	0	328	0	0	119444	0	0	0	0	0	0	0	8759	0	0	0	0	0	0	0	0	0	0	0	0	0	0	0	0	0	0	0	0	0	0	0	0	0	0	0
AM51-8	0	0	0	0	0	0	0	0	0	0	12937	0	0	1367	0	0	0	0	3915	0	0	0	35	0	0	0	0	0	0	0	0	0	0	0	0	0	0	0	0	0	0	0	0	0	0	0	0	0	0
Proteus	0	0	0	0	0	0	0	0	371836	66541	0	0	0	0	0	57361	0	0	0	0	0	0	0	0	0	0	0	0	0	0	2187	0	15317	0	0	0	0	0	0	918	0	0	0	0	21109	0	0	0	0
SFJ001	0	0	0	0	0	0	0	0	0	0	338	0	0	6314	0	0	0	0	139	69	134	1173	516	0	0	0	0	0	0	0	0	0	0	0	0	0	69	1094	234	0	0	511	0	0	0	137	0	0	69
CAG-882	0	0	0	0	0	0	0	0	0	0	731	0	0	9395	0	0	0	0	0	0	0	6364	0	0	0	0	0	0	0	0	0	0	0	0	0	0	0	0	0	0	0	0	0	0	0	0	0	0	0
Papillibacter	0	0	0	0	0	0	0	0	0	0	0	0	0	24	0	0	0	0	0	0	0	48	0	0	0	0	0	0	0	0	0	0	0	0	0	0	0	0	0	0	0	60	0	0	0	0	24	0	0
Choladousia	0	0	0	0	0	0	0	0	0	0	0	0	0	1213	0	0	0	0	0	0	0	0	0	0	0	0	0	0	0	0	0	0	0	0	0	0	0	0	0	0	0	146	0	0	0	0	0	0	0
Neobittarella	0	0	0	0	0	0	0	0	0	0	29	0	295	0	0	0	0	0	0	0	0	216	541	0	0	0	0	0	0	0	0	0	0	0	0	0	0	132	0	0	0	278	0	0	0	1341	0	0	0
Harryflintia	0	0	0	0	0	0	0	0	0	0	0	0	0	0	0	0	0	0	0	0	0	34	0	0	0	0	0	0	0	0	0	0	0	0	0	0	0	0	0	0	0	419	0	0	0	0	0	0	0
Hydrogenoanaerobacterium	0	0	0	0	0	0	0	0	0	0	0	0	0	0	0	0	0	0	0	0	0	55	0	0	0	0	0	0	0	0	0	0	0	0	0	0	0	0	0	0	0	168	0	0	0	0	0	0	0
CAG-95	0	0	0	0	0	0	0	0	0	0	1713	0	0	14192	0	0	0	0	14377	0	0	2346	299	0	0	0	0	0	0	0	0	0	0	0	0	0	0	0	0	0	0	20340	0	0	0	0	0	0	0
CAG-492	0	0	0	0	0	0	0	0	0	0	0	0	0	0	0	0	0	0	0	0	0	26	0	0	0	0	0	0	0	0	0	0	0	0	0	0	0	0	0	0	0	328	0	0	0	0	0	0	0
UBA5905	0	0	0	0	0	0	0	0	0	0	0	0	0	135	0	0	0	0	0	0	0	156	0	0	0	0	0	0	0	0	0	0	0	0	0	0	0	0	0	0	0	0	0	0	0	0	0	0	0
Copromonas	0	41598	0	0	0	0	0	0	0	0	19898	0	18116	12098	1803	171459	26741	3369	2230	10828	10714	2569	18795	33606	0	0	0	0	0	0	0	0	0	0	0	701829	61581	9130	11017	0	587	60224	7901	46503	11619	35661	105	5999	39262
UMGS1766	0	0	0	0	0	0	0	0	0	0	0	0	0	2483	0	0	0	0	0	0	0	0	0	0	0	0	0	0	0	0	0	0	0	0	0	0	0	138	0	0	0	56	0	0	0	0	0	0	0
Heteroruminococcus	0	0	0	0	0	0	0	0	0	0	0	0	0	0	0	0	0	0	0	0	0	55	0	0	0	0	0	0	0	0	0	0	0	0	0	0	0	67	0	0	0	0	0	0	0	0	0	0	0
Peptoniphilus	0	0	0	0	0	219383	0	0	193	0	0	0	0	0	0	0	0	0	0	0	0	0	0	0	0	0	0	0	0	295	0	0	0	0	0	0	0	0	0	0	0	0	0	0	0	0	0	0	0
Varibaculum	0	0	0	0	0	7920	0	0	0	1439	0	0	0	0	623	519	0	0	0	0	0	0	0	0	0	0	0	0	0	4522	0	276	0	0	0	0	0	0	0	0	0	0	0	0	0	0	0	0	0
UMGS1663	0	0	0	0	0	0	0	0	0	0	0	0	0	10705	0	0	0	0	0	0	0	0	0	0	0	0	0	0	0	0	0	0	0	0	0	0	0	11157	0	0	0	111	0	0	0	0	0	0	0
UMGS856	0	0	0	0	0	0	0	0	0	0	0	0	0	750	0	0	0	0	307	0	0	158	0	0	0	0	0	0	0	0	0	0	0	0	0	0	0	0	0	0	0	0	0	0	0	0	107	0	0
Anaerococcus	0	0	0	0	0	6310	0	0	155	0	0	0	0	0	0	0	0	0	0	0	0	0	0	0	0	0	305	0	0	0	0	0	0	0	0	0	0	0	0	0	0	0	0	0	0	0	0	0	0
Gemella	16768	0	22408	0	0	0	594	0	0	0	0	0	0	0	0	0	0	0	0	0	0	0	0	0	0	0	1476	0	0	0	0	0	0	0	0	0	0	0	0	0	0	0	0	0	0	0	0	0	0
Barnesiella	0	0	0	0	0	0	0	0	0	0	0	0	0	146053	419155	0	0	0	0	0	0	140762	0	0	0	0	0	0	0	0	0	0	0	9795	0	0	0	0	0	0	0	0	0	0	0	0	0	0	0
Lactobacillus	0	0	194566	0	0	94984	380177	0	2295	0	0	424156	0	21	0	0	0	0	0	0	0	0	0	0	0	171701	10263	5440	0	0	0	2061701	0	0	24513	0	0	0	0	0	0	0	0	0	263045	0	0	0	0
Actinomyces	0	56	0	0	0	0	0	0	0	0	0	0	0	0	0	0	0	0	0	0	0	0	0	0	0	0	0	0	0	2776	0	0	0	0	0	0	0	0	0	0	0	0	0	4563	0	0	0	0	0
HGM13634	0	0	0	0	0	0	0	0	0	0	0	0	0	0	0	0	0	0	0	0	0	374	0	0	0	0	0	0	0	0	0	0	0	0	0	0	0	0	0	0	0	595	0	0	0	0	0	0	0
Faecalibacterium	0	1216087	0	63266	0	0	0	0	0	0	513094	0	610685	340600	31995	2319140	0	322035	289364	235699	306460	908585	1723112	212446	0	0	0	0	0	0	0	0	0	92875	0	322889	185739	604462	346839	0	87696	535652	105005	615473	4821624	1327399	157273	29604	763014
Mannheimia	0	862	0	0	0	0	0	0	0	0	0	0	0	0	0	0	0	0	0	0	0	0	0	0	0	0	0	0	0	0	0	0	93	0	0	0	0	0	0	0	0	0	0	0	0	0	0	0	0
CAG-115	0	0	0	0	0	0	0	0	0	0	3852	0	0	0	0	0	0	0	0	0	0	0	0	0	0	0	0	0	0	0	0	0	0	0	0	0	0	0	0	0	0	706	0	0	0	0	0	0	0
CAG-273	0	0	0	0	0	0	0	0	0	0	0	0	0	0	0	0	0	0	313	0	0	56	0	0	0	0	0	0	0	0	0	0	0	0	0	0	0	1343	0	0	0	577781	0	0	0	0	0	0	0
Porphyromonas	0	0	0	0	0	0	0	0	400	1409	0	0	0	0	974	0	0	0	0	0	0	38197	0	0	0	0	0	0	0	1695	5345	0	0	0	0	0	0	0	0	0	0	0	0	0	0	0	0	0	0
UMGS27	0	0	0	0	0	0	0	0	0	0	0	0	0	0	543	0	0	0	0	0	0	73	0	0	0	0	0	0	0	0	0	0	0	0	0	0	0	0	0	0	0	0	0	0	0	0	0	0	0
UBA3282	0	0	0	0	0	0	0	0	0	0	103	0	0	0	0	0	0	0	78	0	0	0	0	0	0	0	0	0	0	0	0	0	0	0	0	0	0	0	0	0	0	26	0	0	0	0	0	0	0
Finegoldia	0	0	0	0	0	34138	0	0	0	0	0	0	0	0	0	0	0	0	0	0	0	0	0	0	0	0	23	0	0	0	0	494	0	0	0	0	0	0	0	268	0	0	0	0	0	0	0	0	0
Gabonibacter	0	0	0	0	0	0	0	0	0	0	0	0	0	0	77	0	0	219	0	0	0	287	0	0	0	0	0	0	0	0	0	0	0	0	0	0	0	0	0	394	0	0	0	0	0	0	0	0	0
UBA11524	0	0	0	0	0	0	0	0	0	0	2732	0	0	3556	0	0	0	0	0	0	0	0	0	0	0	0	0	0	0	0	0	0	0	0	0	0	0	0	0	0	0	0	0	0	0	0	0	0	0
Megamonas	0	0	0	0	0	0	0	0	0	0	0	0	0	0	0	0	0	0	0	12465	0	0	7855	0	0	0	0	0	0	0	0	0	0	0	0	0	0	21409	0	0	0	0	0	0	0	0	0	0	0
RGIG8482	0	0	0	0	0	0	0	0	0	0	0	0	0	0	0	0	0	0	0	0	0	93	0	0	0	0	0	0	0	0	0	0	0	0	0	0	0	0	0	0	0	18	0	0	0	0	0	0	0
CAG-269	0	0	0	0	0	0	0	0	0	0	0	0	0	23457	0	0	0	0	10639	32169	0	75712	0	0	0	0	0	0	0	0	0	0	0	0	0	0	0	73	0	0	0	37042	0	0	0	0	0	2951	0
Sodalis	303	0	0	0	0	101	0	0	249	0	0	0	0	0	0	201	0	0	0	0	0	0	0	0	0	0	0	0	1659	0	0	0	0	252	0	0	0	0	0	0	0	0	0	0	0	0	0	0	0
UBA1221	0	0	0	0	0	0	0	0	0	0	1251	0	0	372	0	0	0	0	0	0	0	0	0	0	0	0	0	0	0	0	0	0	0	0	0	0	0	0	0	0	0	0	0	0	0	0	0	0	0
Acetatifactor	0	0	0	0	0	0	0	0	0	0	142543	0	120878	92926	20429	0	0	10612	184683	116369	6487	273349	242474	0	0	0	0	0	0	0	0	0	0	0	0	0	0	29946	359	0	0	374866	0	0	0	211334	855150	0	2852
Providencia	0	0	0	0	0	0	0	0	1439	0	0	0	0	0	0	0	0	0	242	0	0	0	0	0	0	0	0	0	0	0	0	0	0	0	0	0	0	0	0	0	0	0	0	0	0	0	0	0	0
JAHALF01	158549	0	0	0	4753	6013	0	0	0	0	0	0	0	0	0	4320	0	0	0	0	0	0	0	0	0	29320	0	0	0	0	0	0	3969	0	0	0	1400	0	0	0	0	0	0	0	0	0	0	0	0
Ruminiclostridium	0	0	0	0	0	0	0	0	0	0	0	0	0	10567	0	0	0	0	730	0	0	14084	0	0	0	0	0	0	0	0	0	0	0	0	0	0	0	0	0	0	0	22599	0	0	0	0	0	0	0
KLE1615	0	0	0	0	0	0	0	0	0	0	1270	0	16422	7896	4386	0	0	0	309	3014	0	9675	774	0	0	0	0	0	0	0	0	0	0	0	0	0	0	1737	1628	0	0	33704	0	0	170633	0	0	0	0
F0422	23	0	0	0	0	0	26704	0	0	0	0	0	0	0	0	0	0	0	0	0	0	0	0	0	0	0	0	0	0	0	0	0	0	0	0	0	0	0	0	0	0	0	0	0	0	0	0	0	0
Merdicola	0	0	0	0	0	0	0	0	0	0	0	0	0	0	0	0	0	0	0	0	0	348	0	0	0	0	0	0	0	0	0	0	0	0	0	0	0	0	0	0	0	2624	0	0	0	0	0	0	0
Staphylococcus	95217	0	374786	0	0	4319	3764	0	0	0	0	0	0	0	0	0	0	0	0	0	0	0	0	0	0	26650	10898	0	0	0	3438	3020	0	0	0	0	0	0	0	0	9068	0	0	0	0	0	0	0	0
Scybalenecus	0	0	0	0	0	0	0	0	0	0	0	0	0	80	0	0	0	0	0	0	0	0	0	0	0	0	0	0	0	0	0	0	0	0	0	0	0	0	0	0	0	0	0	0	0	0	0	0	0
Marseille-P3160	0	0	0	0	0	0	0	0	0	0	0	0	0	0	0	0	0	0	0	0	0	87	0	0	0	0	0	0	0	0	0	0	0	0	0	0	0	0	0	0	0	0	0	0	0	0	0	0	0
CAG-317	0	0	0	0	0	0	0	0	0	98	490	0	1679	862	0	3159	0	298	24	442	25	372	2105	0	0	0	0	0	0	353	586	0	434	0	0	0	817	641	444	0	0	410	248	223	0	2850	25	0	0
Faecalicoccus	0	0	0	0	0	0	0	0	0	0	8	0	0	0	0	0	0	0	0	0	0	0	0	0	0	0	0	0	0	0	0	0	0	0	0	0	0	0	0	0	0	0	0	86	0	0	0	0	0
Campylobacter	0	214	263	0	0	7586	0	0	0	0	210338	0	0	25779	0	0	0	0	0	0	8727	0	0	0	0	0	0	0	0	0	0	0	0	0	0	0	0	0	0	0	0	0	0	0	0	0	0	0	0
Jejubacter	4038	918	496	0	415	909	1264	0	3279	289	0	114	538	0	0	1618	489	84	0	0	0	0	0	49	1600	0	1115	1020	7882	0	1529	1032	2153	3484	0	224	0	0	0	676	0	0	0	1552	0	82	0	0	659
Cronobacter	0	0	0	0	0	0	0	0	0	0	0	0	0	0	0	0	0	0	0	0	0	0	0	0	0	0	0	0	95	0	0	0	0	0	0	0	0	0	0	0	0	0	0	0	0	0	0	0	0
Morganella	0	0	0	0	0	0	0	0	0	0	0	0	0	0	0	0	0	0	0	0	0	0	0	0	0	0	0	0	0	0	0	0	0	0	0	0	0	0	0	0	0	0	0	0	0	0	0	0	0
CAG-603	0	0	0	0	0	0	0	0	0	0	0	0	0	40648	0	0	0	0	0	0	0	0	133	0	0	0	0	0	0	0	0	0	0	0	0	18	0	0	0	0	0	0	0	0	0	0	0	0	0
CAG-510	0	0	0	0	0	0	0	0	0	0	934	0	0	0	0	0	0	0	679	0	0	434	670	0	0	0	0	0	0	0	0	0	0	0	0	0	0	0	0	0	0	1042	0	0	0	0	313	0	0
Bibersteinia	0	122	0	0	0	0	0	0	0	0	0	0	0	0	0	0	0	0	0	0	0	0	0	0	0	0	0	0	0	0	0	0	0	0	0	0	0	0	0	0	0	0	0	0	0	0	0	0	0
Rouxiella	410	0	0	0	0	204	0	0	223	0	0	0	0	0	0	204	0	0	0	0	0	0	0	0	0	0	0	0	2165	0	0	0	0	287	0	0	0	0	0	0	0	0	0	0	0	0	0	0	0
GCF-002002485	0	117	0	0	0	0	0	0	0	0	0	0	0	0	0	0	0	0	0	0	0	0	0	0	0	0	0	0	0	0	0	0	0	0	0	0	0	0	0	0	0	0	0	0	0	0	0	0	0
Choladocola	0	0	0	0	0	0	0	0	0	0	11128	0	0	7331	0	0	0	159	5349	852	471	3093	4946	0	0	0	0	0	0	0	0	0	0	0	0	55	0	3162	4469	0	0	19885	0	0	0	5308	0	131	353
Izhakiella	95	69	55	0	125	0	0	0	672	0	0	0	0	0	0	278	0	0	0	0	0	0	0	0	292	0	112	28	498	0	140	84	97	588	0	0	0	0	0	182	0	0	0	111	0	0	0	0	28
UMGS1591	0	0	0	0	0	0	0	0	0	0	0	0	0	0	0	0	0	0	0	0	0	0	0	0	0	0	0	0	0	0	0	0	0	0	0	0	0	0	0	0	0	664	0	0	0	0	0	0	0
CAG-217	0	0	0	0	0	0	0	0	0	0	0	0	0	0	0	0	0	0	0	0	0	1308	0	0	0	0	0	0	0	0	0	0	0	0	0	0	0	3098	0	0	0	0	0	0	0	0	4369	0	0
Neisseria	0	0	0	0	0	0	0	0	0	0	0	0	0	0	0	0	0	0	0	0	0	0	0	0	0	0	0	0	0	0	0	1040	0	0	0	0	0	0	0	0	0	0	0	508	0	0	0	0	0
Eisenbergiella	0	0	0	37652	0	0	0	0	0	0	2770	0	0	6814	31800	0	35478	0	6854	2818	0	1377	4362	0	0	0	0	0	0	0	0	0	0	0	0	0	296	18978	3261	0	0	43196	0	5129	0	87974	28063	0	0
Pygmaiobacter	0	0	0	0	0	0	0	0	0	0	53	0	0	108	0	0	107	94	213	0	0	4269	53	0	0	0	0	0	0	0	0	0	0	0	0	0	775	307	0	0	0	259	0	0	0	1593	1381	0	0
Serratia	723	56	0	0	0	360	0	0	1361	110	0	0	0	0	0	582	0	0	0	0	0	0	0	0	330	0	55	55	3095	0	27	245	222	1091	0	0	0	0	0	138	0	0	0	27	0	0	0	0	0
JAGTTR01	0	0	0	0	0	0	0	0	0	0	0	0	0	0	0	0	0	0	460	0	0	0	0	0	0	0	0	0	0	0	0	0	0	0	0	0	0	0	0	0	0	1781	0	0	0	0	0	0	0
PD-1	0	0	0	0	36	0	0	0	91	0	0	0	0	0	0	73	0	0	0	0	0	0	0	0	128	0	0	0	394	0	0	108	18	164	0	0	0	0	0	0	0	0	0	0	0	0	0	0	0
Metalachnospira	0	0	0	0	0	0	0	0	0	0	0	0	0	1395	0	0	0	0	6125	0	0	55	0	0	0	0	0	0	0	0	0	0	0	0	0	0	0	0	0	0	0	0	0	0	0	1848	0	0	0
Avimicrobium	0	0	0	0	0	0	0	0	0	0	0	0	0	0	0	0	0	0	0	0	0	0	0	0	0	0	0	0	0	0	0	0	0	0	0	0	0	4781	0	0	0	0	0	0	0	163	0	0	0
Berryella	0	0	0	0	0	0	0	0	475	81	0	0	0	0	0	116	0	0	0	0	0	0	0	32	0	0	0	0	0	16	0	0	0	0	0	0	80	0	0	0	41	0	0	0	0	0	0	0	0
CAJLXD01	0	0	0	0	0	0	0	0	0	0	0	0	0	0	0	0	0	0	0	0	0	0	0	0	0	0	0	0	0	0	0	0	0	0	0	0	0	0	0	0	0	0	0	0	0	152	0	0	0
Lactococcus	0	0	0	0	0	0	0	0	0	0	0	0	0	0	0	0	0	0	0	0	0	0	0	0	0	0	0	0	0	0	0	0	0	0	0	0	0	56812	0	0	0	0	0	0	0	0	0	0	0
CAG-353	0	0	0	0	0	0	0	0	0	0	0	0	0	2940	0	0	0	0	8156	0	0	0	0	0	0	0	0	0	0	0	0	0	0	0	0	0	0	0	0	0	0	0	0	0	0	0	0	0	0
CAAEEV01	0	0	0	0	0	0	0	0	471	0	0	0	0	0	0	0	0	0	0	0	0	0	0	0	0	0	0	0	0	0	0	0	0	0	0	0	0	0	0	0	0	0	0	0	0	0	0	0	0
Dielma	0	0	0	0	0	0	0	0	0	0	0	0	0	0	0	0	0	0	0	0	0	0	0	0	0	0	0	0	0	0	0	0	0	0	0	0	0	0	0	0	0	0	0	0	0	108	0	0	0
Erwinia	1275	15	0	0	48	63	0	0	1595	47	0	0	0	0	0	375	32	0	0	0	0	0	0	0	724	0	202	0	6565	0	90	16	170	1497	0	0	0	0	0	48	0	0	0	80	0	0	0	0	0
Velocimicrobium	0	0	0	0	0	0	0	0	0	0	0	0	0	0	0	0	0	0	0	0	0	0	96	0	0	0	0	0	0	0	0	0	0	0	0	0	0	0	0	0	0	0	0	0	0	0	0	0	0
Kineothrix	0	0	0	0	0	0	0	0	0	0	0	0	0	0	0	0	0	0	0	0	0	0	100	0	0	0	0	0	0	0	0	0	0	0	0	0	0	0	0	0	0	0	0	0	0	0	0	0	0
Anaerotruncus	0	0	0	0	0	0	0	0	0	0	3238	0	0	170	2952	0	0	0	0	6320	0	3853	0	0	0	0	0	0	0	10326	0	0	0	0	0	0	0	0	0	0	0	44969	0	0	0	11703	7494	0	0
ZJ141	0	0	0	0	0	0	0	0	331	52	0	0	0	0	0	31	62	0	0	0	0	0	0	0	0	0	0	0	0	0	0	0	0	0	0	0	0	0	0	0	10	0	0	0	0	0	0	0	0
Pseudocitrobacter	0	0	0	0	0	0	0	0	138	0	0	0	0	0	0	0	0	0	0	0	0	0	0	0	0	0	0	0	0	0	0	0	0	0	0	0	0	0	0	0	0	0	0	0	0	0	0	0	0
Parvibacter	0	0	0	0	0	0	0	0	180	0	0	0	0	0	0	63	0	0	0	0	0	0	0	0	0	0	0	0	0	0	0	0	0	0	0	0	0	0	0	0	0	0	0	0	0	0	0	0	0
Granulicatella	671	2663	0	0	0	0	452	0	0	0	0	0	0	0	0	0	0	0	0	0	0	0	0	0	0	0	2092	0	0	0	0	0	0	0	0	0	0	0	0	0	0	0	0	0	0	0	0	0	0
UBA3402	0	0	0	0	0	0	0	0	0	0	1905	0	0	4427	0	0	0	0	0	0	0	0	3060	0	0	0	0	0	0	0	0	0	0	0	0	0	0	0	2721	0	0	4762	0	0	0	0	0	0	0
Chimaeribacter	0	0	0	0	0	0	0	0	0	0	0	0	0	0	0	0	0	0	0	0	0	0	0	0	0	0	0	0	0	0	0	0	0	0	0	0	0	0	0	0	0	0	0	0	0	0	0	0	0
Biostraticola	47	0	0	0	0	0	0	0	77	0	0	0	0	0	0	31	0	0	0	0	0	0	0	0	0	0	0	0	329	0	0	0	0	61	0	0	0	0	0	0	0	0	0	0	0	0	0	0	0
Moellerella	0	0	0	0	0	0	0	0	633	0	0	0	0	0	0	0	0	0	0	0	0	0	0	0	0	0	0	0	0	0	0	0	0	0	0	0	0	0	0	0	0	0	0	0	0	0	0	0	0
CABJAA01	0	0	0	0	0	0	0	0	0	0	0	0	0	0	0	0	0	0	0	0	0	0	0	0	0	0	0	0	0	0	0	0	0	0	0	0	0	0	0	0	0	0	0	0	0	0	0	0	0
Enteroscipio	0	0	0	0	0	0	0	0	3251	395	0	0	0	0	0	122	194	0	0	0	0	0	0	48	0	0	0	0	0	0	0	0	0	0	0	0	369	0	0	0	0	0	0	0	0	0	0	0	0
Falcatimonas	0	0	0	0	0	0	0	0	0	0	0	0	0	16	0	0	0	0	0	0	0	0	0	0	0	0	0	0	0	0	0	0	0	0	0	0	0	0	0	0	0	0	0	0	0	0	0	0	0
Extibacter	0	0	0	0	0	0	0	0	0	0	0	0	3618	0	0	0	0	0	0	0	0	10376	323	0	0	0	0	0	0	0	0	0	0	0	0	0	228733	0	0	0	0	0	0	0	0	142	0	0	0
Lawsonibacter	0	0	0	0	0	0	0	0	0	0	0	0	0	3037	0	0	0	0	0	12390	1295	879	0	0	0	0	0	0	0	0	0	0	0	0	0	0	0	14428	0	0	0	376	0	0	0	8957	10842	0	2295
Lacticaseibacillus	0	0	0	7706	0	0	0	1182	19021	0	0	0	0	0	0	0	0	0	0	0	0	0	0	0	0	0	0	0	0	7173	0	0	1585	0	0	0	0	0	0	0	0	0	0	0	49378	0	0	0	0
UBA4716	0	0	0	0	0	0	0	0	0	0	0	0	0	0	0	0	0	0	0	0	0	0	0	0	0	0	0	0	0	0	0	0	0	0	0	29	0	0	0	0	0	0	0	0	0	0	0	0	0
JGM124	14	363	72	0	174	0	290	0	959	130	0	71	87	0	0	320	42	0	0	0	0	0	0	0	619	0	394	87	668	0	525	359	580	405	0	0	0	0	0	274	0	0	0	217	14	0	0	0	58
UBA2882	0	0	0	0	0	0	0	0	0	0	15	0	0	0	0	0	0	0	182	0	0	30	91	0	0	0	0	0	0	0	0	0	0	0	0	0	0	0	0	0	0	265	0	0	0	0	0	0	0
Cutibacterium	0	0	0	0	0	0	0	0	0	0	0	0	0	0	0	0	0	0	0	0	0	0	0	0	0	0	0	0	0	0	0	0	0	0	0	0	0	0	0	0	0	0	0	0	0	0	0	0	0
Scatocola	0	0	0	0	0	0	0	0	0	0	0	0	0	0	0	0	0	0	0	0	0	0	0	0	0	0	0	0	0	0	0	0	0	0	0	0	0	0	0	0	0	0	0	0	0	0	0	0	0
Edaphovirga	0	0	0	0	0	0	0	0	0	0	0	0	0	0	0	0	0	0	0	0	0	0	0	0	0	0	0	0	55	0	0	0	0	0	0	0	0	0	0	0	0	0	0	0	0	0	0	0	0
Holdemania	0	0	0	0	0	0	0	0	0	0	0	0	0	0	0	0	0	0	0	0	0	0	0	0	0	0	0	0	0	0	0	0	0	0	0	0	0	0	0	0	0	0	0	0	0	825	560	0	0
Catenibacillus	0	0	0	0	0	0	0	0	0	0	0	0	0	0	0	0	0	0	0	0	0	0	0	0	0	0	0	0	0	0	0	0	0	0	0	0	0	0	0	0	0	0	0	0	0	827	22	0	0
Scatosoma	0	0	0	0	0	0	0	0	0	0	0	0	0	0	0	0	0	0	0	0	0	0	0	0	0	0	0	0	0	0	0	0	0	0	0	0	0	0	0	0	0	0	0	0	0	0	0	0	0
COE1	0	0	0	0	0	0	0	0	0	0	8658	0	0	9601	0	0	0	0	174496	0	0	2863	0	0	0	0	0	0	0	0	0	0	0	0	0	0	0	0	0	0	0	146549	0	0	0	0	0	0	0
Peptostreptococcus	0	0	0	0	0	0	110	481	4599	0	0	0	0	0	0	0	0	0	0	0	0	0	0	0	0	0	0	0	0	0	0	0	0	0	0	0	0	0	0	0	0	0	0	0	0	0	0	0	0
Moranella	0	0	0	0	0	0	0	0	7	0	0	0	0	0	0	0	0	0	0	0	0	0	0	0	0	0	0	0	0	0	0	0	0	0	0	0	0	0	0	0	0	0	0	0	0	0	0	0	0
Actinobacillus	0	0	0	0	0	0	0	0	0	0	0	0	0	0	0	0	0	0	0	0	0	0	0	0	0	0	0	0	0	0	0	0	0	0	0	0	0	0	0	0	0	0	0	0	0	0	0	0	0
Mesocricetibacter	0	65	0	0	0	0	0	0	0	0	0	65	0	0	0	0	0	0	0	0	0	0	0	0	0	0	0	0	0	0	0	0	0	0	0	0	0	0	0	0	0	0	0	0	0	0	0	0	0
Massilistercora	0	0	0	0	0	0	0	0	0	0	0	0	0	0	0	0	0	0	0	0	0	0	0	0	0	0	0	0	0	0	0	0	0	0	0	0	69	0	0	0	0	0	0	0	0	0	0	0	0
Pseudescherichia	0	0	0	0	0	0	0	0	0	0	0	0	0	0	0	0	0	0	0	0	0	0	0	0	0	0	0	0	188	0	0	0	0	0	0	0	0	0	0	0	0	0	0	0	0	0	0	0	0
Sutterella	0	72581	0	0	0	4174109	0	0	0	0	0	0	17272	0	2829	0	0	17427	0	2200	8349	0	7234	0	0	0	0	0	0	0	0	0	0	0	0	171585	50074	12475	0	411823	0	0	0	0	0	2685	1083	5815	11034
MD308	0	0	0	0	0	0	0	0	0	0	0	0	0	0	0	0	0	0	0	0	0	0	137	0	0	0	0	0	0	0	0	0	0	0	0	0	0	0	0	0	0	0	0	0	0	121	0	0	0
XBD2001	0	0	0	0	0	0	0	0	0	0	0	0	0	131	0	0	0	0	0	0	0	0	556	0	0	0	0	0	0	0	0	0	0	0	0	0	0	0	0	0	0	72	0	0	0	0	0	0	0
Leminorella	0	0	0	0	0	0	0	0	0	0	0	0	0	0	0	0	0	0	0	0	0	0	0	0	0	0	0	0	0	0	0	0	0	0	0	0	0	0	0	0	0	0	0	0	0	0	0	0	0
Niameybacter	0	0	0	0	0	0	0	0	0	0	0	0	0	0	0	0	0	0	0	0	0	0	0	0	0	0	0	0	0	0	0	0	0	0	0	0	0	0	0	0	0	0	0	0	0	0	0	0	0
QVMH01	0	0	0	0	0	0	0	0	0	0	0	0	0	0	0	0	0	0	0	0	0	0	0	0	0	0	0	0	0	0	0	0	0	0	0	0	0	31	0	0	0	0	0	0	0	0	0	0	0
Alistipes	0	842	0	1451	0	0	0	0	0	0	13061	0	151231	97606	537272	0	63387	430549	53934	2415949	0	870030	97507	0	0	0	0	0	0	0	2002	0	0	0	0	0	23273	780192	15744	0	0	0	3445	0	0	2054098	6749452	179	67370
Yokenella	10930	1109	318	0	492	3731	1169	0	4389	374	0	86	485	0	0	3320	199	28	0	0	0	0	0	85	1749	0	636	375	15917	0	919	1136	2159	5726	0	282	0	0	0	627	0	0	0	913	0	228	0	0	288
Trabulsiella	0	0	0	0	0	0	0	0	453	0	0	0	0	0	0	332	0	0	0	0	0	0	0	0	123	0	0	0	1627	0	0	0	0	204	0	0	0	0	0	0	0	0	0	0	0	0	0	0	0
Pantoea	2390	0	0	0	0	1378	0	0	1020	0	0	0	0	0	0	634	0	0	0	0	0	0	0	0	317	0	0	0	6539	0	0	0	19	869	0	0	0	0	0	0	0	0	0	0	0	0	0	0	0
Butyricicoccus	0	0	0	0	0	0	0	0	0	0	0	0	0	67	0	0	0	0	0	0	0	0	0	0	0	0	0	0	0	0	0	0	0	0	0	0	0	0	0	0	0	0	0	0	0	494	0	0	0
Dickeya	0	0	0	0	0	0	0	0	0	0	0	0	0	0	0	0	0	0	0	0	0	0	0	0	0	0	0	0	273	0	0	0	0	117	0	0	0	0	0	0	0	0	0	0	0	0	0	0	0
Lachnotalea	0	0	0	0	0	0	0	0	0	0	0	0	0	0	0	0	0	0	0	0	0	0	0	0	0	0	0	0	0	0	0	0	0	0	0	0	0	0	0	0	0	0	0	0	0	0	0	0	0
Shimwellia	4717	431	146	0	704	1575	463	0	2485	297	0	0	280	0	0	1501	38	0	0	0	0	0	0	0	1907	0	525	507	7810	0	615	611	785	2979	0	0	0	0	0	168	0	0	0	692	0	0	0	0	205
Gibbsiella	0	0	0	0	0	0	0	0	0	0	0	0	0	0	0	0	0	0	0	0	0	0	0	0	0	0	0	0	103	0	0	0	0	0	0	0	0	0	0	0	0	0	0	0	0	0	0	0	0
Scandinavium	2287	681	395	0	816	455	763	0	3636	247	0	163	145	0	0	1828	249	0	0	0	0	0	0	0	1519	0	965	786	8200	0	1260	793	1322	3657	0	84	0	0	0	433	0	0	0	1487	0	0	0	0	432
Superficieibacter	10515	2120	729	0	1609	2737	1770	184	7546	520	0	427	778	0	0	4553	656	384	0	0	0	0	0	300	6582	0	2782	2536	19854	206	2764	3161	3220	8182	0	351	203	0	0	2187	0	0	0	4182	0	37	0	0	1099
Massiliomicrobiota	0	0	0	0	0	0	0	0	0	0	0	0	0	0	0	0	0	0	0	0	0	0	0	0	0	0	0	0	0	0	0	0	0	0	0	0	0	0	0	0	0	0	0	0	0	0	0	0	0
Gallibacterium	0	0	0	0	0	0	0	0	0	0	0	0	0	0	0	0	0	0	0	0	0	0	0	0	0	0	0	0	0	0	0	0	0	0	0	0	0	0	0	0	0	0	0	0	0	0	0	0	0
Ventrisoma	0	0	0	0	0	0	0	0	0	0	0	0	0	0	0	0	0	0	0	0	0	0	0	0	0	0	0	0	0	0	0	0	0	0	0	346	0	0	0	0	0	0	0	0	0	0	0	0	0
Eubacterium	0	0	0	41054	0	0	0	88238	0	0	18982	0	2596	482871	1040	0	0	0	15008	4171	56229	112983	14360	0	0	0	0	0	0	182	1967	0	0	0	0	53	7706	45023	511815	0	0	65800	0	0	0	0	0	0	0
Enterobacillus	0	0	0	0	0	0	0	0	0	0	0	0	0	0	0	0	0	0	0	0	0	0	0	0	0	0	0	0	109	0	0	0	0	36	0	0	0	0	0	0	0	0	0	0	0	0	0	0	0
Massilioclostridium	0	0	0	0	0	0	0	0	0	0	0	0	0	0	0	0	0	0	0	0	0	0	0	0	0	0	0	0	0	0	0	0	0	0	0	0	0	187	0	0	0	0	0	0	0	0	0	0	0
Amedibacterium	0	0	0	0	0	0	0	0	0	0	0	0	0	0	0	0	0	0	0	0	0	0	0	0	0	0	0	0	0	0	0	0	0	0	0	0	0	0	0	0	0	0	0	0	0	0	0	0	0
Ruthenibacterium	0	0	0	10587	0	0	0	0	0	0	0	0	478	2085	0	0	158517	26034	2450	0	0	1474	0	0	0	0	0	0	0	0	0	0	0	0	0	0	539981	7792	2708	15614	0	4775	0	0	0	4320	6177	0	0
Cricetibacter	0	0	0	0	0	0	0	0	0	0	0	0	0	0	0	0	0	0	0	0	0	0	0	0	0	0	0	0	0	0	0	0	0	0	0	0	0	0	0	0	0	0	0	0	0	0	0	0	0
Enterococcus	0	9581	0	8685	182511	60099	0	0	70663	109312	0	0	512	0	0	27017	0	0	0	0	0	0	0	179683	0	0	17247	2204	246000	9719	54651	22673	12751	929	0	0	28083	0	0	0	0	0	0	5755	14717	0	0	0	0
UBA2918	0	0	0	0	0	0	0	0	0	0	189	0	0	0	0	0	0	0	0	145	0	73	0	0	0	0	0	0	0	0	0	0	0	0	0	0	0	462	0	233	0	0	0	0	0	136	0	0	0
Anaerobutyricum	0	0	0	0	0	0	0	0	0	0	7142	0	4678	210	0	0	0	6020	1363	0	0	32096	0	0	0	0	0	0	0	0	0	0	0	0	0	0	0	16546	27365	0	0	9363	12906	0	0	26452	73172	219	1107
Turicibacter	0	0	0	0	0	0	0	0	0	0	0	0	0	0	0	0	0	0	0	0	0	0	0	0	0	0	0	0	0	0	0	0	0	0	0	0	0	0	0	0	0	0	0	0	0	0	0	0	0
Agathobacter	0	0	0	1348	0	0	0	0	57573	0	188312	0	290414	221250	32496	113502	6659	33792	32780	146914	31814	76712	519340	0	0	0	0	0	0	14857	32	0	0	0	0	118045	0	19437	164433	736	0	16513	0	0	0	0	0	44121	210790
Hoaglandella	0	0	0	0	0	0	0	0	18	0	0	0	0	0	0	0	0	0	0	0	0	0	0	0	0	0	0	0	0	0	0	0	3	0	0	0	0	0	0	0	0	0	0	0	0	0	0	0	0
ATCC-39006	0	0	0	0	0	0	0	0	0	0	0	0	0	0	0	0	0	0	0	0	0	0	0	0	0	0	0	0	0	0	0	0	0	0	0	0	0	0	0	0	0	0	0	0	0	0	0	0	0
Citrobacter	5774	21984	13098	980	14983	1276	23473	2376	49399	8169	0	5782	11898	0	0	17359	8805	3806	0	1889	0	0	0	22965	32949	0	27904	29584	82405	4076	37992	33108	41498	68870	222	6031	2969	0	851	22124	817	0	0	43037	6019	1869	0	0	11377
"1-19"	627	0	0	0	0	140	0	0	208	0	0	0	0	0	0	80	0	0	0	0	0	0	0	0	0	0	0	0	1628	0	0	0	0	255	0	0	0	0	0	0	0	0	0	0	0	0	0	0	0
Robinsoniella	0	0	0	0	0	0	0	0	0	0	0	0	0	0	0	0	0	0	0	0	0	0	0	0	0	0	0	0	0	0	0	0	0	0	0	0	0	0	0	0	0	0	0	0	0	0	0	0	0
FD2005	0	0	0	0	0	0	0	0	0	0	0	0	0	67	0	0	0	0	0	0	0	0	34	0	0	0	0	0	0	0	0	0	0	0	0	0	0	0	0	0	0	0	0	0	0	0	0	0	0
Lelliottia	5681	3362	1679	0	3097	1351	3186	227	9777	610	0	805	1501	0	0	5546	544	337	0	0	0	0	0	490	7675	0	3704	2336	48800	345	5203	2826	6547	10569	0	575	190	0	0	1869	0	0	0	3840	376	726	0	0	1485
Franconibacter	5490	0	0	0	0	902	0	0	1317	0	0	0	0	0	0	1160	0	0	0	0	0	0	0	0	441	0	90	0	11902	0	0	267	268	2643	0	0	0	0	0	0	0	0	0	0	0	0	0	0	0
Edwardsiella	0	0	0	0	0	0	0	0	0	0	0	0	0	0	0	0	0	0	0	0	0	0	0	0	0	0	0	0	0	0	0	0	0	0	0	0	0	0	0	0	0	0	0	0	0	0	0	0	0
Nanosynbacter	0	0	0	0	0	0	0	0	0	0	0	0	0	0	0	0	0	0	0	0	0	0	0	0	0	0	0	0	0	0	0	0	0	0	0	0	0	0	0	0	0	0	0	0	0	0	0	0	0
Acerihabitans	0	0	0	0	0	0	0	0	0	0	0	0	0	0	0	0	0	0	0	0	0	0	0	0	0	0	0	0	40	0	0	0	0	0	0	0	0	0	0	0	0	0	0	0	0	0	0	0	0
Gordonibacter	0	0	0	0	0	0	0	0	0	0	0	0	0	0	0	0	0	0	0	0	0	0	0	1668	0	0	0	0	0	0	0	0	0	0	0	0	0	0	0	0	0	0	0	0	0	0	0	0	0
Hydrogeniiclostridium	0	0	0	0	0	0	0	0	0	0	0	0	0	0	0	0	0	0	0	0	0	0	0	0	0	0	0	0	0	0	0	0	0	0	0	0	0	0	0	0	0	0	0	0	0	0	0	0	0
Cedecea	761	0	0	0	0	256	0	0	1140	0	0	0	0	0	0	500	0	0	0	0	0	0	0	0	620	0	0	0	3183	0	0	125	0	898	0	0	0	0	0	0	0	0	0	0	0	0	0	0	0
Mixta	0	0	0	0	0	0	0	0	0	0	0	0	0	0	0	0	0	0	0	0	0	0	0	0	0	0	0	0	0	0	0	0	0	0	0	0	0	0	0	0	0	0	0	0	0	0	0	0	0
DSM-108975	0	0	0	0	0	0	0	0	0	0	0	0	169	0	136	0	0	544	0	207	0	539	0	0	0	0	0	0	0	0	0	0	0	0	0	0	0	655	0	0	0	0	0	0	0	613	1157	0	0
Ewingella	3217	207	0	0	0	967	343	0	2892	0	0	0	0	0	0	1623	0	0	0	0	0	0	0	0	623	0	0	0	13688	0	0	0	69	2245	0	0	0	0	0	0	0	0	0	0	0	0	0	0	0
RUG115	0	0	0	0	0	0	0	0	0	0	29382	0	95264	41110	0	0	0	0	38250	10189	0	1232	561546	0	0	0	0	0	0	0	0	0	0	0	0	194	0	0	3410	0	0	34480	0	0	0	0	0	0	1053
GCF-000287335	0	0	0	0	0	0	0	0	0	0	0	0	0	0	0	0	0	0	0	0	0	0	0	0	0	0	0	0	0	0	0	0	0	0	0	0	0	0	0	0	0	0	0	0	0	0	0	0	0
Pseudoflavonifractor	0	0	0	0	0	0	0	0	0	125	0	0	0	0	0	0	233	632	0	0	0	84	0	147	483	0	0	0	0	0	0	0	106	0	0	0	623	0	0	237	0	0	0	0	0	281	0	0	63
Yersinia	0	0	0	0	0	0	0	0	67	0	0	0	0	0	0	0	0	0	0	0	0	0	0	0	0	0	0	0	0	0	0	0	33	115	0	0	0	0	0	0	0	0	0	0	0	0	0	0	0
BIGb0383	299	0	0	0	0	64	0	0	259	0	0	0	0	0	0	85	0	0	0	0	0	0	0	0	150	0	0	0	1591	0	0	0	0	64	0	0	0	0	0	0	0	0	0	0	0	0	0	0	0
Avibacterium	0	139	20	0	0	0	0	0	0	0	0	20	0	0	0	0	0	0	0	0	0	0	0	0	0	0	0	0	0	0	0	0	0	0	0	0	0	0	0	101	0	0	0	0	0	0	0	0	0
UBA11774	0	0	0	0	0	0	0	0	0	0	169	0	0	1431	0	0	0	0	0	0	0	170	4379	0	0	0	0	0	0	0	0	0	0	0	0	0	0	0	0	0	0	4286	0	0	0	0	0	0	0
Buttiauxella	216	0	0	0	0	0	0	0	586	0	0	0	0	0	0	45	0	0	0	0	0	0	0	0	0	0	0	0	2023	0	0	0	0	162	0	0	0	0	0	0	0	0	0	0	0	0	0	0	0
CHH4-2	0	0	0	0	0	0	0	0	0	0	0	0	0	0	0	0	0	0	0	0	0	0	0	0	296	0	0	0	0	0	0	0	0	0	0	0	0	0	0	0	0	0	0	0	0	0	0	0	0
Paraeggerthella	0	0	0	0	0	0	0	0	1391	0	0	0	0	0	0	0	0	0	0	0	0	0	0	0	0	0	0	0	0	0	0	0	0	0	0	0	119	0	0	0	0	0	0	0	0	0	0	0	0
Aggregatibacter	0	0	0	0	0	0	0	0	0	0	0	0	0	0	0	0	0	0	0	0	0	0	0	0	0	0	0	0	0	0	0	0	0	0	0	0	0	0	0	2648	0	0	0	0	0	0	0	0	0
Klebsiella	2022456	0	0	0	11171	643342	0	3337	139193	4671	0	0	0	0	0	209715	0	0	0	0	0	0	0	2216	44834	0	0	0	1839291	0	0	17993	733	188175	0	0	0	0	0	0	0	9158	0	0	0	27487	770	0	0
Rubneribacter	0	0	0	0	0	0	0	0	4669	812	0	0	0	0	0	263	595	0	0	0	0	0	0	522	0	0	0	0	0	448	0	0	0	0	0	0	1385	0	0	0	0	0	0	0	270	0	0	0	0
SZZW01	0	11	0	0	0	0	0	0	185	0	0	0	0	0	0	11	0	0	0	0	0	0	0	0	68	0	0	0	170	0	11	0	0	140	0	0	0	0	0	11	0	0	0	35	0	0	0	0	0
Enterobacter	17945	5329	189	0	1043	5476	947	0	8591	326	0	179	431	0	0	5105	159	0	0	0	0	0	0	121	22437	0	1293	972	565916	66	1968	1430	2635	9622	0	109	43	0	0	1045	0	0	0	1472	22	8823	0	0	410
Melissococcus	0	0	0	0	0	0	0	0	0	0	0	0	0	0	0	0	0	0	0	0	0	0	0	0	0	0	0	0	0	0	0	0	0	0	0	0	0	0	0	0	0	0	0	0	0	0	0	0	0
NSJ-51	0	0	0	562	0	0	0	0	0	766	0	0	0	0	0	0	1370	3371	0	0	0	0	0	1241	4373	0	0	0	0	0	0	0	1562	0	0	0	2369	0	0	1581	0	0	0	0	0	1171	133	0	0
Fimimorpha	0	0	0	0	0	0	0	0	0	0	0	0	0	0	0	0	0	0	0	0	0	0	12	0	0	0	0	0	0	0	0	0	0	0	0	0	0	0	0	0	0	0	0	0	0	0	0	0	0
Doolittlea	0	0	0	0	0	0	0	0	34	0	0	0	0	0	0	0	0	0	0	0	0	0	0	0	0	0	0	0	11	0	0	0	0	0	0	0	0	0	0	0	0	0	0	0	0	0	0	0	0
Butyribacter	0	0	0	0	0	0	0	0	0	0	0	0	0	0	0	0	0	0	0	0	0	0	0	0	0	0	0	0	0	0	0	0	0	0	0	0	0	0	0	0	0	1526	0	0	0	0	0	0	0
Merdibacter	0	0	0	0	0	0	0	0	0	0	0	0	0	0	0	0	0	0	0	0	0	0	0	0	0	0	0	0	0	0	0	0	0	0	0	0	0	0	0	0	0	0	0	0	0	0	0	0	0
CAG-45	0	0	0	0	0	0	0	0	0	0	0	0	0	0	0	0	0	0	0	0	0	5745	1809	0	0	0	0	0	0	0	0	0	0	0	0	0	0	0	0	0	0	0	0	0	0	0	0	0	0
Hungatella	0	0	0	10522	0	0	0	0	0	92604	0	0	0	0	1531	0	167	0	0	0	0	0	0	0	3772932	0	0	0	0	0	0	0	0	0	0	98810	3940	0	0	38406	0	14585	0	0	4927	2719	1107	0	0
Bilifractor	0	0	0	0	0	0	0	0	0	0	0	0	0	0	0	0	0	0	0	0	0	0	0	0	0	0	0	0	0	0	0	0	0	0	0	0	0	0	0	0	0	0	0	0	0	0	0	0	0
Longibaculum	0	0	0	0	0	0	0	0	0	0	0	0	0	0	0	0	0	0	0	0	0	0	0	0	0	0	0	0	0	0	0	0	0	0	0	0	0	0	0	0	0	0	0	0	0	0	0	0	0
Coprobacter	0	0	0	0	0	0	0	0	0	0	0	0	0	0	0	0	0	0	0	0	0	0	0	0	0	0	0	0	0	0	0	0	0	0	0	0	0	0	0	0	0	0	0	0	0	0	0	0	0
Merdiplasma	0	0	0	0	0	0	0	0	0	0	0	0	0	0	0	0	0	0	0	0	0	0	0	0	0	0	0	0	0	0	0	0	0	0	0	0	0	0	0	0	0	0	0	0	0	0	0	0	0
Blautia	0	99205	0	81062	0	0	0	0	0	114420	72308	0	102603	107874	87712	149662	116846	160832	47326	68065	32956	444840	52985	43729	0	0	0	0	0	275736	26250	0	0	0	0	73975	167236	96576	271721	0	3348	110178	158273	105148	92813	149639	106289	4431	30941
QWKK01	0	0	0	0	0	0	0	0	1489	126	0	0	0	0	0	0	0	0	0	0	0	0	0	0	0	0	0	0	0	0	0	0	0	0	0	0	0	0	0	0	0	0	0	0	0	0	0	0	0
Kosakonia	195	118	0	0	47	0	94	0	1712	0	0	0	47	0	0	483	0	0	0	0	0	0	0	0	580	0	285	236	3182	0	237	358	550	1259	0	0	0	0	0	241	0	0	0	191	0	0	0	0	166
Histophilus	0	296	70	0	0	0	0	0	0	0	0	129	0	0	0	0	0	0	0	0	0	0	0	0	0	82	0	0	0	0	0	0	0	0	0	0	0	0	0	0	0	0	0	0	0	0	0	0	0
Hafnia	0	0	0	0	0	0	0	0	371	0	0	0	0	0	0	0	0	0	0	0	0	0	0	0	0	0	0	0	214	0	0	0	0	0	0	0	0	0	0	0	0	0	0	0	0	0	0	0	0
Tatumella	0	0	0	0	0	0	0	0	156	0	0	0	0	0	0	0	0	0	0	0	0	0	0	0	70	0	0	0	282	0	0	0	0	111	0	0	0	0	0	0	0	0	0	0	0	0	0	0	0
CAJFUR01	0	0	0	0	0	0	0	0	4665	810	0	0	0	0	0	573	283	0	0	0	0	0	0	441	0	0	0	0	0	606	0	0	0	0	0	0	1145	0	0	0	0	0	0	0	0	0	0	0	0
TWA4	0	0	0	0	0	0	0	0	0	0	0	0	0	0	0	0	0	0	0	0	0	0	0	0	0	0	0	0	0	0	0	0	0	0	0	0	0	0	0	0	0	0	0	0	0	0	0	0	0
Pluralibacter	54091	750	93	0	1016	16921	416	46	8907	282	0	0	47	0	0	6908	47	0	0	0	0	0	0	608	3448	0	612	328	65475	0	1076	1357	1342	11977	0	0	0	0	0	518	0	0	0	1434	0	368	0	0	236
MGBC113645	0	0	0	0	0	0	0	0	0	0	0	0	0	102	0	0	0	0	0	0	0	0	0	0	0	0	0	0	0	0	0	0	0	0	0	0	0	0	0	0	0	0	0	0	0	0	0	0	0
Weimeria	0	0	0	0	0	0	0	0	0	0	0	0	0	0	0	0	0	0	0	0	0	0	252	0	0	0	0	0	0	0	0	0	0	0	0	0	0	0	0	0	0	0	0	0	0	0	0	0	0
Parabacteroides	0	197315	0	0	0	0	0	0	0	0	61418	0	166427	97185	82404	0	0	51675	31675	313191	38928	607028	84612	12	0	0	0	0	0	0	0	0	0	3554292	40016	0	0	263872	26395	9981	733	515860	2100	0	0	1355	1188	0	70863
Clostridioides	0	0	0	1356	0	0	0	0	0	0	0	0	0	0	0	0	0	0	0	0	0	0	0	47381	7522	0	0	0	0	0	0	0	15723	170	0	0	0	0	0	0	0	0	0	0	0	0	0	0	0
Phytobacter	812	71	0	0	95	305	0	0	1987	0	0	0	0	0	0	854	0	0	0	0	0	0	0	0	431	0	167	72	2802	0	48	142	143	1080	0	0	0	0	0	0	0	0	0	24	0	0	0	0	0
Longicatena	0	0	0	0	0	0	0	0	0	0	0	0	0	0	0	0	0	0	0	0	0	0	0	0	0	0	0	0	0	0	0	0	0	0	0	0	0	0	0	0	0	0	0	0	0	0	0	0	0
Instestinimonas	0	0	0	0	0	0	0	0	0	0	0	0	0	0	0	0	198	358	0	0	0	0	0	0	601	0	0	0	0	0	0	0	195	0	0	0	431	0	0	157	0	0	0	0	0	155	233	0	0
Intestinimonas	0	0	0	0	0	0	0	0	0	0	546	0	0	74	0	0	0	352	0	0	0	4145	0	0	115	0	0	0	0	0	0	0	0	265	0	0	233	3634	0	161	0	6106	0	0	0	467	0	0	0
Plesiomonas	460	0	0	0	0	0	0	0	1469	0	0	0	0	0	0	204	0	0	0	0	0	0	0	0	304	0	0	0	3042	0	0	0	50	673	0	0	0	0	0	0	0	0	0	0	0	0	0	0	0
Adlercreutzia	0	0	0	0	0	0	0	0	0	0	0	0	0	0	0	0	0	0	0	0	0	0	0	0	0	0	0	0	0	0	0	0	0	0	0	0	0	0	0	0	0	0	0	0	0	0	0	0	0
RHBSTW-00994	540	301	49	0	149	99	75	0	1256	0	0	0	24	0	0	498	0	0	0	0	0	0	0	0	862	0	248	225	10802	0	172	370	199	1251	0	0	0	0	0	174	0	0	0	425	0	0	0	0	25
Salmonella	0	0	0	0	0	0	0	0	1170	0	0	0	0	0	0	0	0	0	0	0	0	0	0	0	0	0	166	0	561	0	91	636	0	1578	0	0	0	0	0	233	0	0	0	324	0	0	0	0	0
Marseille-P3106	0	0	0	0	0	0	0	0	0	0	0	0	0	0	0	0	0	283	0	0	0	2095	0	0	239	0	0	0	0	0	0	0	0	0	0	0	310	30	0	29	0	0	0	0	0	251	0	0	0
HGM12998	0	0	0	0	0	0	0	0	0	0	0	0	0	0	0	0	0	0	0	0	0	0	0	0	0	0	0	0	0	0	0	0	0	0	0	0	0	0	0	0	0	0	0	0	0	0	0	0	0
An92	0	0	0	21	0	0	0	0	0	107	0	0	0	0	0	0	337	610	0	0	0	0	0	104	896	0	0	0	0	0	0	0	124	0	0	0	452	0	0	458	0	0	0	0	0	830	21	0	42
1XD42-69	0	0	0	0	0	0	0	0	0	0	0	0	0	3202	0	0	0	0	0	0	0	0	1091	0	0	0	0	0	0	0	0	0	0	0	0	0	0	0	0	0	0	0	0	0	0	0	0	0	0
Siccibacter	5027	24	0	0	0	1871	0	0	1703	0	0	0	0	0	0	1383	0	0	0	0	0	0	0	0	516	0	0	0	11435	0	0	0	123	2212	0	0	0	0	0	0	0	0	0	0	0	0	0	0	0
Peptacetobacter	0	0	0	0	0	0	0	0	0	0	0	0	0	0	0	0	0	0	0	0	0	0	0	0	0	0	0	0	0	0	0	0	0	0	0	0	0	0	0	0	0	0	0	0	0	0	0	0	0
CAG-303	0	0	0	0	0	0	0	0	0	0	0	0	0	48	0	0	0	0	0	0	0	0	126	0	0	0	0	0	0	0	0	0	0	0	0	192	0	0	0	0	0	0	0	0	0	0	0	0	0
Volucribacter	0	0	0	0	0	0	0	0	0	0	0	0	0	0	0	0	0	0	0	0	0	0	0	0	0	0	0	0	0	0	0	0	0	0	0	0	0	0	0	9	0	0	0	0	0	0	0	0	0
Dysgonomonas	0	0	0	0	0	0	0	0	0	0	0	0	0	0	86	0	42007	0	0	74	0	48	0	0	0	0	0	0	0	0	0	0	0	0	0	0	0	108	0	0	0	0	0	0	0	24	0	0	0
Bacteroides	0	1607370	0	2295222	0	0	0	9521300	0	0	1403295	0	1965755	648480	1948608	0	5176292	956270	359660	2964758	0	1836744	1850357	5802354	0	0	0	0	0	0	7553379	0	0	305890	433896	5142399	4068550	4077849	1034936	3877630	111728	3873244	341	0	0	2272422	1855436	4716	6031
Bisgaardia	0	0	0	0	0	0	0	0	0	0	0	0	0	0	0	0	0	0	0	0	0	0	0	0	0	0	0	0	0	0	0	0	0	0	0	0	0	0	0	0	0	0	0	0	0	0	0	0	0
Caviibacterium	0	0	0	0	0	0	0	0	0	0	0	0	0	0	0	0	0	0	0	0	0	0	0	0	0	0	0	0	0	0	0	0	0	0	0	0	0	0	0	0	0	0	0	0	0	0	0	0	0
Fusicatenibacter	0	0	0	0	0	0	0	0	0	0	11445	0	12751	25325	0	0	0	0	0	3992	0	20059	5510	0	0	0	0	0	0	0	0	0	0	0	0	0	0	4270	14938	0	0	21036	2625	0	0	4144	2697	0	0
Conservatibacter	0	0	0	0	0	0	0	0	0	0	0	0	0	0	0	0	0	0	0	0	0	0	0	0	0	0	0	0	0	0	0	0	0	0	0	0	0	0	0	0	0	0	0	0	0	0	0	0	0
Lacrimispora	0	0	0	0	0	0	0	0	0	0	0	0	0	0	0	0	0	0	0	0	0	0	0	0	1426	0	0	0	0	0	0	0	0	0	0	137	0	0	0	1202	0	0	0	0	0	0	0	0	0
Canicola	0	0	0	0	0	0	0	0	0	0	0	0	0	0	0	0	0	0	0	0	0	0	0	0	0	0	0	0	0	0	0	0	0	0	0	0	0	0	0	0	0	0	0	0	0	0	0	0	0
MGBC163490	0	0	0	0	0	0	0	0	0	0	0	0	0	0	0	0	0	0	0	0	0	0	0	0	0	0	0	0	0	0	0	0	0	0	0	0	0	0	0	0	0	0	0	0	0	0	0	0	0
Merdimonas	0	0	0	0	0	0	0	0	0	0	0	0	0	0	0	153	0	0	0	0	0	0	460	0	0	0	0	0	0	0	0	0	0	0	0	0	431	0	0	0	0	0	0	0	0	572	108	0	0
Lachnoclostridium	0	0	0	0	0	0	0	0	0	0	126	0	443	609	909	639	0	874	594	0	464	2618	988	0	1381	0	0	0	0	0	0	0	0	0	0	273	0	2172	0	0	0	83	1272	0	0	3071	0	0	0
Mediterraneibacter	0	17056	0	402	0	0	0	0	0	1822	44164	0	57331	62070	5180	10672	6098	8520	59245	3402	20236	126132	54547	635	0	0	0	0	0	2642	9209	0	0	0	0	5436	1005	83103	15293	13297	8557	90299	19025	6478	51558	249845	19733	4808	3742
Atlantibacter	3899	1728	142	0	1226	607	910	0	5592	490	0	0	286	0	0	3842	468	0	0	0	0	0	0	349	2913	0	1590	938	11441	0	2639	1069	2560	4915	0	0	0	0	0	935	0	0	0	1629	0	0	0	0	1354
UBA8514	0	0	0	0	0	0	0	0	0	0	0	0	0	0	0	0	0	0	0	0	0	0	0	0	0	0	0	0	0	0	0	0	0	0	0	0	0	0	0	0	0	0	0	0	0	1183	0	0	0
Stoquefichus	0	0	0	0	0	0	0	0	0	0	0	0	0	0	0	0	112	0	0	0	0	0	0	0	0	0	0	0	0	0	0	0	0	0	0	0	0	0	0	0	0	0	0	0	0	0	0	0	0
Kluyvera	9113	0	0	0	0	1949	0	0	50043	0	0	0	0	0	0	2992	0	0	0	0	0	0	0	0	1174	0	107	0	18944	0	0	216	939	4699	0	0	0	0	0	0	0	0	0	53	0	0	0	0	0
B14	0	0	0	0	0	0	0	0	294	0	0	0	0	0	0	28	0	0	0	0	0	0	0	0	14	0	0	0	0	0	0	0	0	98	0	0	0	0	0	0	0	0	0	0	0	0	0	0	0
Enterocloster	0	43501	0	0	0	0	0	26708	0	20862	552	44780	33538	2853	6339	32400	91279	20806	257	5823	8172	144	20250	31138	0	0	0	0	0	195625	32537	0	0	0	0	175213	16365	10334	20160	5916	53178	32502	6241	31507	89332	107694	42732	0	13075
Lonepinella	0	115	21	0	0	0	0	0	0	0	0	0	0	0	0	0	0	0	0	0	0	0	0	0	0	10	0	0	0	0	0	0	0	0	0	0	0	0	0	21	0	0	0	0	0	0	0	0	0
Tannerella	0	0	0	0	0	0	0	0	0	0	0	0	0	0	45	0	0	0	0	0	0	89	0	0	0	0	0	0	0	0	0	0	0	0	0	0	0	23	0	0	0	0	0	0	0	0	0	0	0
Flavonifractor	0	23747	0	61907	0	0	0	0	0	60965	491	0	8757	96	16085	0	90109	150799	0	13923	0	3754	3062	79728	167867	0	0	0	0	17345	0	0	91999	7367	0	0	113918	10918	7071	87975	0	3708	0	680	8239	59478	34254	0	23812
Paraprevotella	0	144	0	0	0	0	0	0	0	0	414	0	314	70	316	0	0	36	0	321	0	267	370	0	0	0	0	0	0	0	0	0	0	0	0	0	0	2456	0	133	0	0	0	0	0	219	38	0	420
Haemophilus	2576	97090	88919	0	44207	776	36088	0	0	0	3403	71556	1194	0	0	715	0	0	1189	11836	2166	3740	42080	0	0	74789	0	0	0	3322	2177	2201	32191	0	0	14348	0	0	1969	68624	30969	93	12796	7902	0	636	0	0	0
Roseburia	0	0	0	0	0	0	0	0	0	0	107468	0	51809	114530	12361	0	0	0	273699	210280	34031	110854	1502360	0	0	0	0	0	0	0	0	0	0	0	0	455520	0	95842	57759	24355	0	180793	0	0	0	0	0	6706	0
UBA2821	0	0	0	0	0	0	0	0	0	0	0	0	0	370	0	0	0	0	0	0	0	44	221	0	0	0	0	0	0	0	0	0	0	0	0	293	0	0	33	0	0	88	0	0	0	0	0	0	0
MGBC140090	0	0	0	0	0	0	0	0	0	0	0	0	0	0	0	0	0	0	0	0	0	0	0	0	0	0	0	0	0	0	0	0	0	0	0	0	0	0	0	0	0	0	0	0	0	0	0	0	0
Fimousia	0	0	0	0	0	0	0	0	0	0	269	0	0	536	0	0	0	0	0	0	0	0	1092	0	0	0	0	0	0	0	0	0	0	0	0	0	0	338	0	0	0	0	0	0	0	0	0	0	0
Massilibacteroides	0	0	0	0	0	0	0	0	0	0	0	0	11	0	0	0	0	0	0	89	0	199	0	0	0	0	0	0	0	0	0	0	0	55	0	0	0	123	0	0	0	133	0	0	0	0	0	0	0
Parasutterella	0	0	0	0	0	0	0	0	0	0	0	0	0	0	0	0	0	0	0	0	0	0	0	0	0	0	0	0	0	0	0	0	0	0	0	0	0	0	0	0	0	0	0	0	0	0	0	0	0
Luxibacter	0	0	0	0	0	0	0	0	0	0	1640	0	0	0	0	0	0	0	0	1063	0	0	619	0	0	0	0	0	0	0	0	0	0	0	0	0	0	0	0	27834	0	411	0	0	0	14477	0	0	513
GCA-900066495	0	0	0	0	0	0	0	0	0	0	0	0	0	0	0	0	0	0	0	0	0	0	0	0	0	0	0	0	0	0	0	0	0	0	0	0	0	0	0	0	0	0	0	0	0	0	0	0	0
Rodentibacter	0	3004	2757	0	920	0	696	0	0	0	0	1796	0	0	0	0	0	0	0	0	0	0	1393	0	0	2060	0	0	0	0	0	0	0	0	0	0	0	0	0	3210	186	0	0	0	0	0	0	0	0
Marvinbryantia	0	0	0	0	0	0	0	0	0	0	0	0	0	269	0	0	0	0	0	0	0	0	362	0	0	0	0	0	0	0	0	0	0	0	0	0	0	55	0	0	0	387	0	0	0	0	0	0	0
Paraclostridium	0	0	0	0	0	3514	0	0	0	0	0	0	0	0	0	0	0	0	0	0	0	0	0	0	0	0	0	0	0	0	0	0	0	0	0	0	0	0	0	0	0	0	0	0	0	0	0	0	0
Pasteurella	0	527	533	0	291	0	87	0	0	0	0	364	0	0	0	0	0	0	0	0	0	0	436	0	0	376	0	0	0	0	0	0	0	0	0	0	0	0	0	726	103	0	0	0	0	0	0	0	0
Macellibacteroides	0	182	0	0	0	0	0	0	0	0	120	0	296	381	0	0	0	30	0	181	0	1326	0	0	0	0	0	0	0	0	0	0	0	243	0	0	0	272	0	120	0	1646	0	0	0	0	0	0	0
Pullilachnospira	0	0	0	0	0	0	0	0	0	0	0	0	0	0	0	0	0	0	0	0	0	0	0	0	0	0	0	0	0	0	0	0	0	0	0	0	0	0	22	0	0	22	0	0	0	129	0	0	0
Pelethocola	0	0	0	0	0	0	0	0	0	0	0	0	0	0	0	0	0	0	0	0	0	186	0	0	0	0	0	0	0	0	0	0	0	0	0	0	0	0	0	0	0	47	0	0	0	0	0	0	0
Basfia	0	605	508	0	236	0	103	0	0	0	0	353	0	0	0	0	0	0	0	0	0	0	235	0	0	237	0	0	0	0	0	0	0	0	0	0	0	0	0	653	165	0	0	0	0	0	0	0	0
Veillonella	25277	307405	285749	0	1566	1113482	2082991	0	94228	218833	20966	424332	1459	2118	0	12208	0	153	1288	14630	14087	32454	75710	0	0	2833	9074	0	0	0	134527	173126	2269	0	0	108529	4043	0	9574	99573	193544	4201	12273	164621	237510	3878	0	1485	1517
UMGS1071	0	0	0	0	0	0	0	0	0	0	0	0	0	0	275	19362	0	0	0	0	0	0	308	0	0	0	0	0	0	0	0	0	0	0	0	0	0	3632	0	0	0	852	0	0	0	0	975	0	0
Asaccharospora	0	0	0	0	0	0	0	0	0	0	0	0	0	0	0	0	0	0	0	0	0	0	0	180	0	0	0	0	0	0	0	0	0	0	0	0	0	0	0	0	0	0	0	0	0	0	0	0	0
Eggerthella	0	0	0	12508	17135	0	0	3643	173830	51337	0	0	675	0	380	41132	46432	0	0	0	0	2422	0	26109	0	0	0	12819	0	35556	2775	1441	7102	0	0	0	55326	0	2253	0	0	1958	280	0	25962	6244	8681	0	0
Oliverpabstia	0	0	0	0	0	0	0	0	0	0	1605	0	108	5021	0	0	0	0	33	0	0	239	239	0	0	0	0	0	0	74	0	0	0	0	0	0	0	24097	8698	0	0	6534	0	0	0	365	36	0	0
Phocaeicola	0	79001	0	0	0	0	0	553	0	0	161733	4402	276821	16530	528049	0	664	55673	20301	450785	16047	206405	252019	663632	0	0	0	0	0	0	692	0	0	3703698	0	304	4516	1086855	89680	1095117	0	241803	12763	0	0	769463	1508806	0	38498
Coprobacillus	0	0	0	0	0	0	0	0	0	0	0	0	0	0	0	0	18337	0	0	0	0	0	0	0	0	0	0	0	0	0	0	0	0	0	0	0	0	0	0	0	0	5459	0	0	0	0	0	0	0
Barb7	0	166	0	0	0	0	0	0	0	0	88	0	126	38	368	0	0	97	0	369	0	858	97	0	0	0	0	0	0	0	0	0	0	2280	0	0	0	595	38	208	0	463	0	0	0	88	9	0	0
Paralachnospira	0	0	0	0	0	0	0	0	0	0	0	0	0	0	0	0	0	0	0	0	0	22	46	0	0	0	0	0	0	0	0	0	0	0	0	56	0	0	0	0	0	34	0	0	0	11	0	0	0
An181	0	0	0	0	0	0	0	0	0	0	0	0	0	0	0	0	0	0	0	0	0	0	99	0	0	0	0	0	0	102	0	0	0	0	0	0	0	66	0	0	0	0	0	0	0	188	0	0	0
CAG-41	0	0	0	0	0	0	0	0	0	0	1382	0	0	1887	0	0	0	0	0	7265	0	836	0	0	0	0	0	0	0	0	0	0	0	0	0	73327	0	0	0	0	0	92258	0	0	0	9980	163	0	0
RUG11200	0	0	0	0	0	0	0	0	0	0	0	0	0	1232	0	0	0	0	0	186	0	466	1325	0	0	0	0	0	0	0	0	0	0	0	0	1418	0	0	251	0	0	782	0	0	0	0	0	0	0
CAG-56	0	0	0	0	0	0	0	0	0	0	123	0	0	173	0	0	0	0	0	0	0	89	240	0	0	0	0	0	0	0	0	0	0	0	0	36	0	0	0	0	0	277	0	0	0	17	0	0	0
Terrisporobacter	0	0	0	0	0	0	0	0	0	0	0	0	0	0	0	0	0	0	0	0	0	5954	656	0	0	0	0	0	0	0	0	0	0	0	0	0	0	1100	0	0	0	0	0	0	0	0	0	0	0
CCUG-7971	0	0	0	0	0	0	0	0	0	0	0	0	0	0	0	0	0	0	0	0	0	0	0	151	0	0	0	0	0	0	0	0	0	0	0	0	0	0	0	0	0	0	0	0	0	0	0	0	0
[truncated: 65 more columns]

## Sheet: family
SampleID	elcho01	elcho02	elcho03	elcho04	elcho05	elcho06	elcho07	elcho08	elcho09	elcho10	elcho11	elcho12	elcho13	elcho14	elcho15	elcho16	elcho17	elcho18	elcho19	elcho20	elcho21	elcho22	elcho23	elcho24	elcho25	elcho26	elcho27	elcho28	elcho29	elcho30	elcho31	elcho32	elcho33	elcho34	elcho35	elcho36	elcho37	elcho38	elcho39	elcho40	elcho41	elcho42	elcho43	elcho44	elcho45	elcho46	elcho47	elcho48	elcho49
Study	elcho	elcho	elcho	elcho	elcho	elcho	elcho	elcho	elcho	elcho	elcho	elcho	elcho	elcho	elcho	elcho	elcho	elcho	elcho	elcho	elcho	elcho	elcho	elcho	elcho	elcho	elcho	elcho	elcho	elcho	elcho	elcho	elcho	elcho	elcho	elcho	elcho	elcho	elcho	elcho	elcho	elcho	elcho	elcho	elcho	elcho	elcho	elcho	elcho
Age_days	35	35	56	60	100	149	164	166	214	217	245	279	308	311	332	356	367	405	436	441	549	571	594	617	22	47	118	147	160	205	228	240	250	285	329	333	346	374	380	382	431	462	463	476	476	511	511	537	566
Age_cat	age0	age0	age0	age0	age0	age0	age1	age1	age1	age1	age1	age1	age2	age2	age2	age2	age2	age2	age2	age2	age3	age3	age3	age3	age0	age0	age0	age0	age1	age1	age1	age1	age1	age1	age2	age2	age2	age2	age2	age2	age2	age3	age3	age3	age3	age3	age3	age3	age3
Sex	F	F	F	F	F	F	F	F	F	F	F	F	F	F	F	F	F	F	F	F	F	F	F	F	M	M	M	M	M	M	M	M	M	M	M	M	M	M	M	M	M	M	M	M	M	M	M	M	M
																									ELCHO
family	elcho01	elcho02	elcho03	elcho04	elcho05	elcho06	elcho07	elcho08	elcho09	elcho10	elcho11	elcho12	elcho13	elcho14	elcho15	elcho16	elcho17	elcho18	elcho19	elcho20	elcho21	elcho22	elcho23	elcho24	elcho25	elcho26	elcho27	elcho28	elcho29	elcho30	elcho31	elcho32	elcho33	elcho34	elcho35	elcho36	elcho37	elcho38	elcho39	elcho40	elcho41	elcho42	elcho43	elcho44	elcho45	elcho46	elcho47	elcho48	elcho49
Atopobiaceae	4177	1407586	103862	0	822	32556	706	0	4400759	988655	0	32672	521775	380	697635	1544439	271734	313211	0	3511	300262	4128	131897	1002443	729	7168	23057	429768	1143467	0	1205	733	102	0	2509	146477	8404	9386	0	89040	438325	0	58871	4606	1188	0	0	4363	33239
Megasphaeraceae	0	2401581	0	202344	0	863978	0	3364	421043	1814136	0	17132	1357675	0	134938	688213	432628	249515	0	48551	245332	2069	21396	917405	0	0	0	1600641	0	3068262	456475	102719	272446	0	0	373388	357690	0	14209	896319	3673904	1535	1029400	5113097	1976289	134806	13242	16460	106731
Peptostreptococcaceae	0	0	0	1356	0	3514	110	481	4599	10484	0	0	869	0	0	10463	2408	0	0	0	0	10436	656	47800	7522	0	0	0	0	3563	0	0	16850	170	0	0	0	2720	0	0	0	0	459	0	0	23984	2519	0	0
Dialisteraceae	0	120664	0	26532	0	0	1442	0	7299	8537	0	3180	111659	58180	13423	31141	29961	168756	164393	49102	122911	105784	97997	0	0	0	0	7086	0	203293	31853	30479	23633	0	0	53298	0	37354	277601	175879	380738	30994	125120	296	23888	2217	13323	80284	128163
Clostridiaceae	137309	0	0	48428	0	224891	14534	22003	110661	54382	0	0	1797	20558	0	6719	0	0	0	333	0	6140	70990	0	6642453	0	0	0	0	42129	0	4050	38152	0	0	0	0	0	0	0	0	0	1420	0	540	3125	0	3020	1771
Acidaminococcaceae	0	0	0	10883	0	0	0	0	0	43817	199804	0	13633	129936	117289	380720	101060	4187	80965	0	3326	0	3710	10145	0	0	0	0	0	7748	284664	10122	75294	1818	0	7744	7126	0	0	217474	38954	286	4275	0	130794	0	0	0	441
UBA1381	0	0	0	0	0	0	0	0	0	0	1382	0	0	4792	0	0	0	0	7925	7265	0	836	0	0	0	0	0	0	0	0	0	0	0	0	0	73356	0	0	0	0	0	92258	0	0	0	9980	163	0	0
Coriobacteriaceae	0	86610	0	13804	0	74775	10530	0	26939	8	15742	1233	52529	4932	47017	595272	67136	508908	3224	14427	102494	7416	71652	0	0	0	0	0	0	421139	63285	0	111095	0	16941	0	120385	86000	111500	34604	26058	9731	36385	0	0	111384	20422	3982	182760
Veillonellaceae	25300	307405	285749	0	1566	1113482	2109695	0	94228	218833	20966	424332	1459	2118	0	12208	0	153	1288	14630	14087	32454	75710	0	0	2833	9074	0	0	0	134527	173126	2269	0	0	108529	4043	0	9574	99573	193544	4201	12273	164621	237510	3878	0	1485	1517
Lachnospiraceae	0	248145	0	304924	0	0	0	26708	114139	355958	1044434	44780	1020026	1265180	288276	898983	323992	320623	1115777	690894	205740	1376909	3474531	187415	3776553	0	0	0	0	831671	161866	0	176897	0	0	3108613	612790	653674	826448	112013	98718	1561754	273135	411768	521193	1323503	1316637	73057	379044
Erysipelotrichaceae	0	0	0	64497	0	0	0	0	0	0	87931	0	0	85630	3444	0	11089	4483	5242	51676	35098	93919	32186	17708	0	0	0	0	0	18992	0	0	0	0	0	0	32778	71774	180	6547	33682	0	13119	136005	43510	20734	680	4914	7592
Coprobacillaceae	0	15746	0	9941	0	0	0	0	0	31346	71593	0	23440	133592	8471	14916	21321	58852	713	7097	1631	0	10070	13070	0	0	0	0	0	31437	33629	0	4550	0	0	4326	36873	37147	9616	0	27090	24526	47393	8248	10439	7803	12540	2610	14344
non-sig
Lactobacillaceae	0	94732	194566	56933	0	173927	380177	1182	149549	283950	0	754307	209914	21	0	0	3559	578	0	0	1649	1231	0	19345	0	171701	10263	5440	0	11804	0	2534979	6482	0	27104	0	0	0	658	0	0	0	84	17969	936064	0	0	4263	2601
Streptococcaceae	617627	253438	4017970	13386	161638	254950	1112457	31685	266034	58614	579	318794	52728	17464	21568	201566	9285	28306	991	1557	9765	14857	34517	40249	266255	109643	946774	102333	89625	76715	19577	1053054	100270	11996	50691	53937	17685	56812	9853	1042	189523	25	30067	1284609	116532	2434	0	2679	11943
Anaerovoracaceae	0	0	0	0	0	0	0	0	0	182	50745	0	2337	19801	51644	9463	0	24875	7201	139	3765	27772	0	0	0	0	0	0	0	0	6266	0	0	0	0	0	1177	9501	308	1867	0	3383	191	0	0	1068	322	0	4209
Bifidobacteriaceae	6052346	1867809	3067858	1929921	10287051	3536245	4139465	1811825	3841793	6063228	12208	896587	806934	1268	1825124	3831151	442455	1574720	18500	51049	1288607	73409	113897	2133704	41946	7342819	7749372	6189516	7560173	3167809	1747299	2104131	1553424	114967	8102855	240861	4609729	403879	362678	357098	4576383	75559	482958	1738563	1240858	1213397	501783	4797	219510
Selenomonadaceae	0	0	0	109	0	0	0	0	0	0	0	0	0	7211	1308	0	28431	2891	0	12546	7596	0	7855	0	0	0	0	0	0	0	0	0	0	0	0	0	0	21409	135986	148233	61642	0	2386	0	0	0	0	47205	37513
UBA932	0	3162	0	0	0	0	0	0	0	0	192817	0	0	1471521	4843958	0	0	626231	0	0	899109	124578	43936	0	0	0	0	0	0	0	0	0	0	0	0	0	0	0	0	0	9065	0	141252	0	0	0	0	47689	8414
Desulfovibrionaceae	0	0	0	0	0	0	0	0	0	2365	19156	0	0	27729	9028	15293	50578	6338	3167	20688	33916	92212	8242	24719	0	0	0	0	0	0	32431	0	0	0	0	0	29395	0	7265	25948	0	16798	0	0	1083	3273	340	0	18943
Micrococcaceae	289045	17012	688677	0	40532	155	30484	1285	0	299	0	6289	0	0	0	0	0	0	0	0	0	0	0	0	39051	57480	196319	9782	1095	0	0	16077	14124	1697	146	0	0	0	0	0	15228	0	0	41023	896	0	0	0	0
QAMH01	0	64	0	0	0	0	0	0	428	74	0	0	56	0	9	292	89	56	0	0	18	0	0	64	0	0	0	0	0	0	0	0	0	0	0	0	0	0	0	0	73	0	0	0	0	0	0	0	0
Burkholderiaceae	0	72581	0	10819	0	4174109	0	48303	142205	84610	11516	67541	17272	7150	4104	361907	50550	17427	7338	2267	13183	971	10222	160475	0	0	0	3018	0	2617	143933	149227	101477	0	0	899803	68387	24552	13016	457819	77151	52934	1666	18354	653886	2685	1083	19638	31505
UBA660	0	0	0	0	0	0	0	0	0	0	2803	0	0	164901	0	0	0	0	36573	0	18791	205783	6970	0	0	0	0	0	0	0	0	0	0	0	0	0	0	843	0	0	0	207262	0	0	0	0	1054	0	0
Marinifilaceae	0	7558	0	0	0	0	0	0	0	0	48365	0	118505	119998	438683	0	0	140038	2784	0	1786	571672	14446	0	0	0	0	0	0	0	0	0	0	0	0	0	0	0	0	1967673	0	0	6395	0	0	26356	53480	1493	0
Nanogingivalaceae	11914	614	4012	0	17863	0	8142	0	0	0	0	0	0	0	0	124	0	0	0	0	0	0	0	0	0	0	79605	0	0	0	0	2310	2058	0	0	47	1014	0	0	0	0	0	0	0	0	0	0	0	0
Actinomycetaceae	74951	56	12416	0	41811	10325	1995	0	948	3262	0	1819	0	0	623	2627	0	0	0	0	0	0	0	0	0	8723	64583	126	1418	7298	0	276	1117	0	0	0	438	0	0	0	1261	0	0	6807	0	0	0	0	0
Eubacteriaceae	0	0	0	41054	0	0	0	88238	0	0	0	0	0	0	1040	15	0	0	0	0	0	0	5719	0	0	0	0	0	0	182	1967	0	0	0	0	0	7706	0	0	1005	0	0	0	0	0	0	0	0	0
Muribaculaceae	0	28141	0	0	0	0	0	0	0	0	382076	0	143645	0	0	0	0	380279	0	0	15999	0	0	0	0	0	0	0	0	0	0	0	0	0	0	0	0	0	0	0	0	0	43401	0	0	0	0	17105	80084
Akkermansiaceae	0	0	0	0	0	0	0	0	0	0	121337	0	14849	15525	0	0	747997	0	10693	229	0	321170	25525	7000	0	0	0	73675	0	326842	0	0	294784	0	0	179588	1432	154196	3835	808775	61762	44223	0	0	0	580923	8718	0	0
Christensenellaceae	0	0	0	0	0	0	0	0	0	114	0	0	0	0	630	0	0	114	0	0	0	1276	0	0	0	0	0	0	0	0	0	0	0	0	0	0	0	2312	0	0	0	450	0	0	3521	2509	583	0	0
Succinivibrionaceae	0	0	0	0	0	0	0	0	0	0	0	0	0	5982	0	0	0	0	0	0	0	125348	0	0	0	0	0	0	0	0	0	0	0	0	0	0	0	2289	0	0	0	0	356	0	0	0	0	51473	214683
Fusobacteriaceae	0	0	3668	0	0	468	0	0	0	0	0	0	0	0	236	1117	1335	0	0	0	0	0	0	0	0	0	0	9874	0	0	2983	9893	0	0	0	0	0	0	0	3289	57	0	0	11229	16292	750	0	0	0
UMGS124	0	55	0	0	0	0	0	0	167	0	0	0	0	0	974	27	0	136	0	0	0	0	0	0	0	0	0	0	0	0	0	0	0	0	0	0	0	0	0	0	82	0	0	0	0	0	0	0	0
CAG-449	0	0	0	0	0	0	0	0	0	0	1707	0	0	5237	0	0	0	0	2692	0	0	562	0	0	0	0	0	0	0	0	0	0	0	0	0	0	0	0	0	0	0	0	0	0	0	0	0	0	0
Enterobacteriaceae	2174712	982036	698941	139515	591025	687060	1308172	204813	1976045	487936	0	301769	649337	0	5520	816392	527194	315099	16999	102371	1523	50803	992	222047	1201055	11215	1478904	1167273	2786688	171860	1824232	1509089	2280384	3240828	119208	357726	190252	40836	101811	988163	74184	9158	12816	2137698	134151	128247	770	0	616171
Butyricicoccaceae	0	1722	0	0	0	0	0	0	0	0	4552	0	31926	18340	1933	0	1697	10830	2956	3468	457	1475	29505	0	0	0	0	0	0	0	0	0	0	0	0	13143	44597	7257	25930	0	1132	27110	1241	0	0	40253	5216	0	745
Dethiosulfovibrionaceae	0	0	0	0	0	0	0	0	0	0	0	0	0	0	4240	0	0	0	0	0	0	0	0	0	0	0	0	0	0	0	0	0	0	0	0	0	0	0	0	42317	0	29313	0	0	1968	0	0	0	0
Peptoniphilaceae	0	0	0	0	0	301605	0	0	766	0	0	0	0	0	0	0	36	0	0	0	0	0	0	0	0	0	328	0	0	571	0	494	0	0	0	0	0	0	0	268	0	0	0	0	0	0	0	0	0
Gastranaerophilaceae	0	0	0	0	0	0	0	0	0	0	96703	0	0	195687	0	0	0	0	0	0	67793	8759	0	0	0	0	0	0	0	0	0	0	0	0	0	0	0	36946	0	0	0	0	0	0	0	0	0	0	0
Anaerotignaceae	0	0	0	0	0	0	0	0	0	0	12813	0	0	20038	7803	0	35774	0	9166	4890	20260	55	14889	0	0	0	0	0	0	0	0	0	0	0	0	0	0	18355	20948	0	0	28429	0	0	0	3031	916	0	24205
Staphylococcaceae	95217	0	374786	0	0	4319	3764	0	0	0	0	0	0	0	0	0	0	0	0	0	0	0	0	0	0	26650	10898	0	0	0	3438	3020	0	0	0	0	0	0	0	0	9068	0	0	0	0	0	0	0	0
Ruminococcaceae	0	1216103	0	73853	0	0	0	0	0	0	543351	0	759814	413541	93186	2319188	244770	415347	392592	315704	346098	975067	1774148	212446	0	0	0	0	0	10326	0	0	0	92875	0	324153	726897	876907	459704	15614	89420	968931	121384	615473	4821736	1434722	267638	29604	819755
CAG-272	0	0	0	0	0	0	0	0	0	0	0	0	0	42236	0	0	0	0	0	0	0	2162	0	0	0	0	0	0	0	0	0	0	0	0	0	0	0	0	0	0	0	9736	0	0	0	0	0	0	0
Peptococcaceae	0	0	0	0	0	5056	0	0	0	0	0	0	0	0	0	0	0	0	0	0	0	0	0	0	0	0	0	0	0	0	0	0	0	0	0	0	0	0	0	0	0	152	86	0	0	0	0	0	0
CAG-274	158549	0	0	0	4753	6013	0	0	0	0	0	0	0	0	0	4320	0	0	0	0	0	0	0	0	0	29320	0	0	0	0	0	0	3969	0	0	0	1400	0	0	0	0	0	0	0	0	0	0	0	0
Mycobacteriaceae	0	0	0	0	0	829	0	0	0	0	0	0	0	0	0	938	0	0	0	0	0	0	0	0	0	0	659	0	0	0	0	0	0	0	0	0	0	0	0	0	0	0	0	0	0	0	0	0	0
CAG-508	0	0	0	0	0	0	968	0	0	0	0	0	0	35411	0	0	0	0	33057	32169	0	156120	0	0	0	0	0	0	0	0	0	0	0	0	0	0	0	15286	0	0	0	618767	0	0	0	0	2484	2951	0
Campylobacteraceae	0	214	263	0	0	7586	0	0	0	0	210338	0	0	25779	0	0	0	0	0	0	8727	0	0	0	0	0	0	0	0	0	257	0	0	0	0	0	0	0	0	0	0	0	0	0	0	0	0	0	0
Gemellaceae	16768	0	22408	0	0	0	594	0	0	0	0	0	0	0	0	0	0	0	0	0	0	0	0	0	0	0	1476	0	0	0	0	0	0	0	0	0	0	0	0	0	0	0	0	0	0	0	0	0	0
CAG-74	0	0	0	0	0	0	0	0	0	0	3889	0	0	7105	0	0	0	0	958	0	0	3084	0	0	0	0	0	0	0	0	0	0	0	0	0	0	0	0	0	0	0	0	0	0	0	0	949	0	0
Rikenellaceae	0	842	0	1451	0	0	0	0	0	0	13061	0	151400	97606	537408	0	63387	431093	53934	2416156	0	870609	97507	0	0	0	0	0	0	3235	2002	0	0	0	0	0	23273	780847	15744	0	0	13986	3445	0	0	2054711	6750609	179	67370
Porphyromonadaceae	0	0	0	0	0	0	0	0	400	1409	0	0	0	0	974	0	0	0	0	0	0	38197	0	0	0	0	0	0	0	1695	5345	0	0	0	0	0	0	0	0	0	0	0	0	0	0	0	0	0	0
Borkfalkiaceae	0	0	0	0	0	0	0	0	0	0	13079	0	0	91173	0	0	0	0	0	0	95	1594	0	0	0	0	0	0	0	0	0	0	0	0	0	0	0	0	0	0	0	0	0	0	0	0	0	0	0
Enterococcaceae	0	9581	0	8685	182511	60099	0	0	70663	109312	0	0	512	0	0	27017	0	0	0	0	0	0	0	179683	0	0	17247	2204	246000	9719	54651	22673	12751	929	0	0	28083	0	0	0	0	0	0	5755	14717	0	0	0	0
Oscillospiraceae	0	23747	0	62490	0	0	0	0	0	61963	536578	0	8757	991833	298098	0	104776	156405	682221	42498	243442	1127196	57738	88102	174574	0	0	0	0	19142	0	0	93986	7632	0	0	118336	507878	96944	90598	0	888061	0	680	8239	214316	182200	2864	103194
Barnesiellaceae	0	0	0	0	0	0	0	0	0	0	0	0	0	146053	419698	0	0	0	0	0	0	140835	0	0	0	0	0	0	0	0	0	0	0	9795	0	0	0	0	0	0	0	0	0	0	0	0	0	0	0
Propionibacteriaceae	0	0	0	0	0	0	0	0	0	0	0	0	0	0	0	0	0	0	0	0	0	0	0	0	0	0	0	0	0	0	0	0	0	0	0	0	0	0	0	0	0	0	0	0	0	0	0	0	0
Bacteroidaceae	0	2715341	9184	2295256	5729	0	0	9522619	2507	5914	8677348	165276	4377778	4961302	2549480	8574	5405403	5070838	1120049	9074432	2314869	3938662	4444101	6475443	0	0	6241	0	0	201842	7624621	67431	1647	4018707	433896	5255252	4591824	9935267	7224342	6066235	1158318	4149885	9138655	855	71854	3360360	3506268	6880966	8551986
Neisseriaceae	0	0	0	0	0	0	0	0	0	0	0	0	0	0	0	0	0	0	0	0	0	0	0	0	0	0	0	0	0	0	0	1040	0	0	0	0	0	0	0	0	0	0	0	508	0	0	0	0	0
Aerococcaceae	671	2663	0	0	0	0	452	0	0	0	0	0	0	0	0	0	0	0	0	0	0	0	0	0	0	0	2092	0	0	0	0	0	0	0	0	0	0	0	0	0	0	0	0	0	0	0	0	0	0
Eggerthellaceae	0	24647	0	12508	17135	0	0	3643	191911	53766	0	2072	11300	1365	29700	42441	47584	3223	0	0	2665	7425	6788	28856	0	0	0	13445	0	36638	16599	1441	7102	0	0	7674	58460	6538	7567	0	38936	1958	19781	0	26232	6244	8681	0	1471
Cellulosilyticaceae	0	0	0	0	0	0	0	0	0	0	0	0	0	0	0	0	0	0	0	0	0	0	0	0	0	0	0	0	0	0	0	0	0	0	0	0	0	0	0	0	0	0	0	0	0	0	0	0	0
Tannerellaceae	0	199090	0	0	0	0	0	0	0	0	61805	0	168207	98214	83766	0	0	51847	31675	316091	38928	613351	85354	12	0	0	0	0	0	0	0	0	0	3572177	40016	0	0	267076	26433	10353	733	518736	2100	0	0	1443	1197	0	70863
Nanosynbacteraceae	0	0	0	0	0	0	0	0	0	0	0	0	0	0	0	0	0	0	0	0	0	0	0	0	0	0	0	0	0	0	0	0	0	0	0	0	0	0	0	0	0	0	0	0	0	0	0	0	0
Turicibacteraceae	0	0	0	0	0	0	0	0	0	0	0	0	0	0	0	0	0	0	0	0	0	0	0	0	0	0	0	0	0	0	0	0	0	0	0	0	0	0	0	0	0	0	0	0	0	0	0	0	0
Acutalibacteraceae	0	0	0	0	0	0	0	0	0	0	32302	0	250252	525370	187565	19362	0	533368	78426	135760	431564	495786	476157	0	0	0	0	0	0	0	0	0	0	0	0	0	0	211108	617043	0	9247	799101	0	0	0	37791	33649	85914	464319
CAG-239	0	0	0	0	0	0	0	0	0	0	0	0	0	0	0	0	0	0	0	0	0	0	0	0	0	0	0	0	0	0	0	0	0	0	0	0	0	0	0	0	0	0	0	0	0	152	0	0	0
Paludibacteraceae	0	0	0	0	0	0	0	0	0	0	0	0	0	0	0	0	0	0	0	0	0	0	0	0	0	0	0	0	0	0	0	0	0	0	0	0	0	31	0	0	0	0	0	0	0	0	0	0	0
Coprobacteraceae	0	0	0	0	0	0	0	0	0	0	0	0	0	0	0	0	0	0	0	0	0	0	0	0	0	0	0	0	0	0	0	0	0	0	0	0	0	0	0	0	0	0	0	0	0	0	0	0	0
Dysgonomonadaceae	0	0	0	0	0	0	0	0	0	0	0	0	0	0	86	0	42007	0	0	74	0	48	0	0	0	0	0	0	0	0	0	0	0	0	0	0	0	142	0	0	0	0	0	0	0	24	0	0	0
Pasteurellaceae	2576	103749	93189	0	45864	776	36974	0	0	0	3403	74418	1194	0	0	715	0	0	1189	11836	2166	3740	44221	0	0	77724	0	0	0	3322	2177	2201	32284	0	0	14348	0	0	1969	76321	31438	93	12796	7902	0	636	0	0	0
[truncated: 65 more columns]

## Sheet: order
SampleID	elcho01	elcho02	elcho03	elcho04	elcho05	elcho06	elcho07	elcho08	elcho09	elcho10	elcho11	elcho12	elcho13	elcho14	elcho15	elcho16	elcho17	elcho18	elcho19	elcho20	elcho21	elcho22	elcho23	elcho24	elcho25	elcho26	elcho27	elcho28	elcho29	elcho30	elcho31	elcho32	elcho33	elcho34	elcho35	elcho36	elcho37	elcho38	elcho39	elcho40	elcho41	elcho42	elcho43	elcho44	elcho45	elcho46	elcho47	elcho48	elcho49
Study	elcho	elcho	elcho	elcho	elcho	elcho	elcho	elcho	elcho	elcho	elcho	elcho	elcho	elcho	elcho	elcho	elcho	elcho	elcho	elcho	elcho	elcho	elcho	elcho	elcho	elcho	elcho	elcho	elcho	elcho	elcho	elcho	elcho	elcho	elcho	elcho	elcho	elcho	elcho	elcho	elcho	elcho	elcho	elcho	elcho	elcho	elcho	elcho	elcho
Age_days	35	35	56	60	100	149	164	166	214	217	245	279	308	311	332	356	367	405	436	441	549	571	594	617	22	47	118	147	160	205	228	240	250	285	329	333	346	374	380	382	431	462	463	476	476	511	511	537	566
Age_cat	age0	age0	age0	age0	age0	age0	age1	age1	age1	age1	age1	age1	age2	age2	age2	age2	age2	age2	age2	age2	age3	age3	age3	age3	age0	age0	age0	age0	age1	age1	age1	age1	age1	age1	age2	age2	age2	age2	age2	age2	age2	age3	age3	age3	age3	age3	age3	age3	age3
Sex	F	F	F	F	F	F	F	F	F	F	F	F	F	F	F	F	F	F	F	F	F	F	F	F	M	M	M	M	M	M	M	M	M	M	M	M	M	M	M	M	M	M	M	M	M	M	M	M	M
																							ELCHO
order	elcho01	elcho02	elcho03	elcho04	elcho05	elcho06	elcho07	elcho08	elcho09	elcho10	elcho11	elcho12	elcho13	elcho14	elcho15	elcho16	elcho17	elcho18	elcho19	elcho20	elcho21	elcho22	elcho23	elcho24	elcho25	elcho26	elcho27	elcho28	elcho29	elcho30	elcho31	elcho32	elcho33	elcho34	elcho35	elcho36	elcho37	elcho38	elcho39	elcho40	elcho41	elcho42	elcho43	elcho44	elcho45	elcho46	elcho47	elcho48	elcho49
Acidaminococcales	0	0	0	10883	0	0	0	0	0	43817	199804	0	13633	129936	117289	380720	101060	4187	80965	0	3326	0	3710	10145	0	0	0	0	0	7748	284664	10122	75294	1818	0	7744	7126	0	0	217474	38954	286	4275	0	130794	0	0	0	441
Clostridiales	137309	0	0	48428	0	224891	14534	22003	110661	54382	0	0	1797	20558	0	6719	0	0	0	333	0	6140	70990	0	6642453	0	0	0	0	42129	0	4050	38152	0	0	0	0	0	0	0	0	0	1420	0	540	3125	0	3020	1771
UBA1381	0	0	0	0	0	0	0	0	0	0	1382	0	0	4792	0	0	0	0	7925	7265	0	836	0	0	0	0	0	0	0	0	0	0	0	0	0	73356	0	0	0	0	0	92258	0	0	0	9980	163	0	0
Peptostreptococcales	0	0	0	1356	0	3514	110	481	4599	10666	50745	0	3206	19801	51644	19926	2408	24875	7201	139	3765	38208	656	47800	7522	0	0	0	0	3563	6266	0	16850	170	0	0	1177	12221	308	1867	0	3383	650	0	0	25052	2841	0	4209
Coriobacteriales	4177	1518962	103862	26312	17957	107331	11236	3643	4620204	1042503	15742	35977	585660	6677	775335	2182471	386543	825534	3224	17938	405439	18969	210337	1031363	729	7168	23057	443213	1143467	457777	81089	2174	118299	0	19450	154151	187249	101924	119067	123644	503474	11689	115037	4606	27420	117628	29103	8345	217470
Erysipelotrichales	0	15746	0	74438	0	0	0	0	0	31346	159524	0	23440	219222	11915	14916	32410	63335	5955	58773	36729	93919	42256	30778	0	0	0	0	0	50429	33629	0	4550	0	0	4326	69651	108921	9796	6547	60772	24526	60512	144253	53949	28537	13220	7524	21936
Lachnospirales	158549	248145	0	304924	4753	6013	0	26708	114139	355958	1057247	44780	1020026	1285218	296079	903303	359766	320623	1125405	695784	226000	1376964	3489420	187415	3776553	29320	0	0	0	831671	161866	0	180866	0	0	3108613	614190	672029	847396	112013	98718	1590183	273135	411768	521193	1326534	1317553	73057	403249
Bacteroidales	0	2954134	9184	2296707	5729	0	0	9522619	2907	7323	9375472	165276	4959535	6894694	8874053	8574	5510797	6700326	1208442	11806753	3270691	6297952	4685344	6475455	0	0	6241	0	0	206772	7631968	67431	1647	7600679	473912	5255252	4615097	10983363	7266519	8044261	1168116	4682607	9335248	855	71854	5442894	10311554	6947432	8778717
non-sig
Actinomycetales	6416342	1884877	3768951	1929921	10369394	3546725	4171944	1813110	3842741	6066789	12208	904695	806934	1268	1825747	3833778	442455	1574720	18500	51049	1288607	73409	113897	2133704	80997	7409022	8010274	6199424	7562686	3175107	1747299	2120484	1568665	116664	8103001	240861	4610167	403879	362678	357098	4592872	75559	482958	1786393	1241754	1213397	501783	4797	219510
Selenomonadales	0	0	0	109	0	0	0	0	0	0	0	0	0	7211	1308	0	28431	2891	0	12546	7596	0	7855	0	0	0	0	0	0	0	0	0	0	0	0	0	0	21409	135986	148233	61642	0	2386	0	0	0	0	47205	37513
Desulfovibrionales	0	0	0	0	0	0	0	0	0	2365	19156	0	0	27729	9028	15293	50578	6338	3167	20688	33916	92212	8242	24719	0	0	0	0	0	0	32431	0	0	0	0	0	29395	0	7265	25948	0	16798	0	0	1083	3273	340	0	18943
Lactobacillales	618298	360414	4212536	79004	344149	488976	1493086	32867	486246	451876	579	1073101	263154	17485	21568	228583	12844	28884	991	1557	11414	16088	34517	239277	266255	281344	976376	109977	335625	98238	74228	3610706	119503	12925	77795	53937	45768	56812	10511	1042	189523	25	30151	1308333	1067313	2434	0	6942	14544
RF39	0	0	0	0	0	0	0	0	0	0	2803	0	0	164901	0	0	0	0	36573	0	18791	205783	6970	0	0	0	0	0	0	0	0	0	0	0	0	0	0	843	0	0	0	207262	0	0	0	0	1054	0	0
Veillonellales	25300	2829650	285749	228876	1566	1977460	2111137	3364	522570	2041506	20966	444644	1470793	60298	148361	731562	462589	418424	165681	112283	382330	140307	195103	917405	0	2833	9074	1607727	0	3271555	622855	306324	298348	0	0	535215	361733	37354	301384	1171771	4248186	36730	1166793	5278014	2237687	140901	26565	98229	236411
Christensenellales	0	0	0	0	0	0	0	0	0	114	17796	0	2669	100663	630	0	0	114	958	0	95	10005	0	0	0	0	0	0	0	0	0	0	0	0	0	0	0	2312	0	0	0	142194	0	0	3521	2509	1532	0	0
Burkholderiales	0	72581	0	10819	0	4174109	0	48303	142205	84610	11516	67541	17272	7150	4104	361907	50550	17427	7338	2267	13183	971	10222	160475	0	0	0	3018	0	2617	143933	150267	101477	0	0	899803	68387	24552	13016	457819	77151	52934	1666	18862	653886	2685	1083	19638	31505
Eubacteriales	0	0	0	41054	0	0	0	88238	0	0	0	0	0	0	1040	15	0	0	0	0	0	0	5719	0	0	0	0	0	0	182	1967	0	0	0	0	0	7706	0	0	1005	0	0	0	0	0	0	0	0	0
RFN20	0	0	0	0	0	0	0	0	0	0	1707	0	0	5237	0	0	0	0	3794	0	36878	2085	0	0	0	0	0	0	0	0	0	0	0	0	0	0	0	0	0	0	0	0	0	0	0	0	0	0	0
Verrucomicrobiales	0	0	0	0	0	0	0	0	0	0	121337	0	14849	15525	0	0	747997	0	10693	229	0	321170	25525	7000	0	0	0	73675	0	326842	0	0	294784	0	0	179588	1432	154196	3835	808775	61762	44223	0	0	0	580923	8718	0	0
Fusobacteriales	0	0	3668	0	0	468	0	0	0	0	0	0	0	0	236	1117	1335	0	0	0	0	0	0	0	0	0	0	9874	0	0	2983	9893	0	0	0	0	0	0	0	3289	57	0	0	11229	16292	750	0	0	0
Saccharimonadales	11914	614	4012	0	17863	0	8142	0	0	0	0	0	0	0	0	124	0	0	0	0	0	0	0	0	0	0	79605	0	0	0	0	2310	2058	0	0	47	1014	0	0	0	0	0	0	0	0	0	0	0	0
Synergistales	0	0	0	0	0	0	0	0	0	0	0	0	0	0	4240	0	0	0	0	0	0	0	0	0	0	0	0	0	0	0	0	0	0	0	0	0	0	0	0	42317	0	29313	0	0	1968	0	0	0	0
Tissierellales	0	0	0	0	0	301605	0	0	766	0	0	0	0	0	0	0	36	0	0	0	0	0	0	0	0	0	328	0	0	571	0	494	0	0	0	0	0	0	0	268	0	0	0	0	0	0	0	0	0
Gastranaerophilales	0	0	0	0	0	0	0	0	0	0	96703	0	0	195687	0	0	0	0	0	0	67793	8759	0	0	0	0	0	0	0	0	0	0	0	0	0	0	0	36946	0	0	0	0	0	0	0	0	0	0	0
Enterobacterales	2177288	1085785	792130	139515	636889	687836	1345146	204813	1976045	487936	3403	376187	650531	5982	5520	817107	527194	315099	18188	114207	3689	179891	45213	222047	1201055	88939	1478904	1167273	2786688	175182	1826409	1511290	2312668	3240828	119208	372074	190252	43125	103780	1064484	105622	9251	25968	2145600	134151	128883	770	51473	830854
Peptococcales	0	0	0	0	0	5056	0	0	0	0	0	0	0	0	0	0	0	0	0	0	0	0	0	0	0	0	0	0	0	0	0	0	0	0	0	0	0	0	0	0	0	152	86	0	0	0	0	0	0
Mycobacteriales	0	0	0	0	0	829	0	0	0	0	0	0	0	0	0	938	0	0	0	0	0	0	0	0	0	0	659	0	0	0	0	0	0	0	0	0	0	0	0	0	0	0	0	0	0	0	0	0	0
Campylobacterales	0	214	263	0	0	7586	0	0	0	0	210338	0	0	25779	0	0	0	0	0	0	8825	0	0	0	0	0	0	0	0	0	257	0	0	0	0	0	0	0	0	0	0	0	101	0	0	0	0	0	0
Staphylococcales	111985	0	397194	0	0	4319	4358	0	0	0	0	0	0	0	0	0	0	0	0	0	0	0	0	0	0	26650	12374	0	0	0	3438	3020	0	0	0	0	0	0	0	0	9068	0	0	0	0	0	0	0	0
TANB77	0	0	0	0	0	0	968	0	0	0	47576	0	0	35411	0	0	0	0	33057	32169	0	156120	0	0	0	0	0	0	0	0	0	0	0	0	0	0	0	15286	0	0	0	618767	0	0	0	0	2484	2951	0
Oscillospirales	0	1241572	0	136343	0	0	0	0	0	61963	1116783	0	1050749	1997870	580782	2338550	351243	1115950	1156195	497430	1021561	2603381	2337548	300548	174574	0	0	0	0	29468	0	0	93986	100507	0	337296	889830	1603150	1199621	106212	99799	2692939	122625	616153	4829975	1727082	488703	118382	1388013
Propionibacteriales	0	0	0	0	0	0	0	0	0	0	0	0	0	0	0	0	0	0	0	0	0	0	0	0	0	0	0	0	0	0	0	0	0	0	0	0	0	0	0	0	0	0	0	0	0	0	0	0	0
Haloplasmatales	0	0	0	0	0	0	0	0	0	0	0	0	0	0	0	0	0	0	0	0	0	0	0	0	0	0	0	0	0	0	0	0	0	0	0	0	0	0	0	0	0	0	0	0	0	0	0	0	0
RF32	0	0	0	0	0	0	0	0	0	0	0	0	0	19892	0	0	0	0	0	0	0	0	0	0	0	0	0	0	0	0	0	0	0	0	0	0	0	0	0	0	0	0	0	0	0	152	0	0	0
[truncated: 65 more columns]

## Sheet: class
SampleID	elcho01	elcho02	elcho03	elcho04	elcho05	elcho06	elcho07	elcho08	elcho09	elcho10	elcho11	elcho12	elcho13	elcho14	elcho15	elcho16	elcho17	elcho18	elcho19	elcho20	elcho21	elcho22	elcho23	elcho24	elcho25	elcho26	elcho27	elcho28	elcho29	elcho30	elcho31	elcho32	elcho33	elcho34	elcho35	elcho36	elcho37	elcho38	elcho39	elcho40	elcho41	elcho42	elcho43	elcho44	elcho45	elcho46	elcho47	elcho48	elcho49
Study	elcho	elcho	elcho	elcho	elcho	elcho	elcho	elcho	elcho	elcho	elcho	elcho	elcho	elcho	elcho	elcho	elcho	elcho	elcho	elcho	elcho	elcho	elcho	elcho	elcho	elcho	elcho	elcho	elcho	elcho	elcho	elcho	elcho	elcho	elcho	elcho	elcho	elcho	elcho	elcho	elcho	elcho	elcho	elcho	elcho	elcho	elcho	elcho	elcho
Age_days	35	35	56	60	100	149	164	166	214	217	245	279	308	311	332	356	367	405	436	441	549	571	594	617	22	47	118	147	160	205	228	240	250	285	329	333	346	374	380	382	431	462	463	476	476	511	511	537	566
Age_cat	age0	age0	age0	age0	age0	age0	age1	age1	age1	age1	age1	age1	age2	age2	age2	age2	age2	age2	age2	age2	age3	age3	age3	age3	age0	age0	age0	age0	age1	age1	age1	age1	age1	age1	age2	age2	age2	age2	age2	age2	age2	age3	age3	age3	age3	age3	age3	age3	age3
Sex	F	F	F	F	F	F	F	F	F	F	F	F	F	F	F	F	F	F	F	F	F	F	F	F	M	M	M	M	M	M	M	M	M	M	M	M	M	M	M	M	M	M	M	M	M	M	M	M	M
																						ELCHO
class	elcho01	elcho02	elcho03	elcho04	elcho05	elcho06	elcho07	elcho08	elcho09	elcho10	elcho11	elcho12	elcho13	elcho14	elcho15	elcho16	elcho17	elcho18	elcho19	elcho20	elcho21	elcho22	elcho23	elcho24	elcho25	elcho26	elcho27	elcho28	elcho29	elcho30	elcho31	elcho32	elcho33	elcho34	elcho35	elcho36	elcho37	elcho38	elcho39	elcho40	elcho41	elcho42	elcho43	elcho44	elcho45	elcho46	elcho47	elcho48	elcho49
Clostridia	295858	1489717	0	532105	4753	536023	15612	137430	230165	483083	2291529	44780	2078447	3471513	930175	3268513	713453	1461562	2330741	1233120	1251421	4191654	5904333	535763	10601102	29320	328	0	0	907584	170099	4544	329854	100677	0	3519265	1512903	2304998	2047325	221365	198517	5316384	397830	1027921	5355229	3094282	1813276	197410	1797242
Coriobacteriia	4177	1518962	103862	26312	17957	107331	11236	3643	4620204	1042503	15742	35977	585660	6677	775335	2182471	386543	825534	3224	17938	405439	18969	210337	1031363	729	7168	23057	443213	1143467	457777	81089	2174	118299	0	19450	154151	187249	101924	119067	123644	503474	11689	115037	4606	27420	117628	29103	8345	217470
Bacteroidia	0	2954134	9184	2296707	5729	0	0	9522619	2907	7323	9375472	165276	4959535	6894694	8874053	8574	5510797	6700326	1208442	11806753	3270691	6299655	4685344	6475455	0	0	6241	0	0	206772	7631968	67431	1647	7600679	473912	5255252	4615097	10983363	7266519	8044261	1168116	4682607	9335248	855	71854	5442894	10311554	6947432	8778717
non=sig
Actinomycetia	6416342	1884877	3768951	1929921	10369394	3547554	4171944	1813110	3842741	6066789	12208	904695	806934	1268	1825747	3834716	442455	1574720	18500	51049	1288607	73409	113897	2133704	80997	7409022	8010933	6199424	7562686	3175107	1747299	2120484	1568665	116664	8103001	240861	4610167	403879	362678	357098	4592872	75559	482958	1786393	1241754	1213397	501783	4797	219510
Desulfovibrionia	0	0	0	0	0	0	0	0	0	2365	19156	0	0	27729	9028	15293	50578	6338	3167	20688	33916	92212	8242	24719	0	0	0	0	0	0	32431	0	0	0	0	0	29395	0	7265	25948	0	16798	0	0	1083	3273	340	0	18943
Negativicutes	25300	2829650	285749	239868	1566	1977460	2111137	3364	522570	2085323	220770	444644	1484426	197445	266958	1112282	592080	425502	246646	124829	393252	140307	206668	927550	0	2833	9074	1607727	0	3279303	907519	316446	373642	1818	0	542959	368859	58763	437370	1537478	4348782	37016	1173454	5278014	2368481	140901	26565	145434	274365
Verrucomicrobiae	0	0	0	0	0	0	0	0	0	0	121337	0	14849	15525	0	0	747997	0	10693	229	0	321170	25525	7000	0	0	0	73675	0	326842	0	0	294784	0	0	179588	1432	154196	3835	808775	61762	44223	0	0	0	580923	8718	0	0
Fusobacteriia	0	0	3668	0	0	468	0	0	0	0	0	0	0	0	236	1117	1335	0	0	0	0	0	0	0	0	0	0	9874	0	0	2983	9893	0	0	0	0	0	0	0	3289	57	0	0	11229	16292	750	0	0	0
Saccharimonadia	11914	614	4012	0	17863	0	8142	0	0	0	0	0	0	0	0	124	0	0	0	0	0	0	0	0	0	0	79605	0	0	0	0	2310	2058	0	0	47	1014	0	0	0	0	0	0	0	0	0	0	0	0
Synergistia	0	0	0	0	0	0	0	0	0	0	0	0	0	0	4240	0	0	0	0	0	0	0	0	0	0	0	0	0	0	0	0	0	0	0	0	0	0	0	0	42317	0	29313	0	0	1968	0	0	0	0
Vampirovibrionia	0	0	0	0	0	0	0	0	0	0	96703	0	0	195687	0	0	0	0	0	0	67793	8759	0	0	0	0	0	0	0	0	0	0	0	0	0	0	0	36946	0	0	0	0	0	0	0	0	0	0	0
Peptococcia	0	0	0	0	0	5056	0	0	0	0	0	0	0	0	0	0	0	0	0	0	0	0	0	0	0	0	0	0	0	0	0	0	0	0	0	0	0	0	0	0	0	152	86	0	0	0	0	0	0
Bacilli	730283	376160	4609730	153442	344149	493295	1497444	32867	486246	483222	164613	1073101	286594	406845	33483	243499	45254	92219	47313	60330	103812	317875	83743	270055	266255	307994	988750	109977	335625	148667	111295	3646586	124053	12925	77795	58263	115419	166576	20307	7589	259363	231813	90663	1452586	1121262	30971	14274	14466	36480
Campylobacteria	0	214	263	0	0	7586	0	0	0	0	210338	0	0	25779	0	0	0	0	0	0	8825	0	0	0	0	0	0	0	0	0	257	0	0	0	0	0	0	0	0	0	0	0	101	0	0	0	0	0	0
Gammaproteobacteria	2177288	1158366	792130	150334	636889	4861945	1345146	253116	2118250	572546	14919	443728	667803	13132	9624	1179014	577744	332526	25526	116474	16872	180862	55435	382522	1201055	88939	1478904	1170291	2786688	177799	1970342	1661557	2414145	3264546	119208	1271877	258639	67677	116796	1522303	182773	62185	27634	2164462	788037	131568	1853	71111	862359
Alphaproteobacteria	0	0	0	0	0	0	0	0	0	0	0	0	0	19892	0	0	0	0	0	0	0	0	0	0	0	0	0	0	0	0	0	0	0	0	0	0	0	0	0	0	0	0	0	0	0	152	0	0	0
[truncated: 65 more columns]

## Sheet: phylum
SampleID	elcho01	elcho02	elcho03	elcho04	elcho05	elcho06	elcho07	elcho08	elcho09	elcho10	elcho11	elcho12	elcho13	elcho14	elcho15	elcho16	elcho17	elcho18	elcho19	elcho20	elcho21	elcho22	elcho23	elcho24	elcho25	elcho26	elcho27	elcho28	elcho29	elcho30	elcho31	elcho32	elcho33	elcho34	elcho35	elcho36	elcho37	elcho38	elcho39	elcho40	elcho41	elcho42	elcho43	elcho44	elcho45	elcho46	elcho47	elcho48	elcho49
Study	elcho	elcho	elcho	elcho	elcho	elcho	elcho	elcho	elcho	elcho	elcho	elcho	elcho	elcho	elcho	elcho	elcho	elcho	elcho	elcho	elcho	elcho	elcho	elcho	elcho	elcho	elcho	elcho	elcho	elcho	elcho	elcho	elcho	elcho	elcho	elcho	elcho	elcho	elcho	elcho	elcho	elcho	elcho	elcho	elcho	elcho	elcho	elcho	elcho
Age_days	35	35	56	60	100	149	164	166	214	217	245	279	308	311	332	356	367	405	436	441	549	571	594	617	22	47	118	147	160	205	228	240	250	285	329	333	346	374	380	382	431	462	463	476	476	511	511	537	566
Age_cat	age0	age0	age0	age0	age0	age0	age1	age1	age1	age1	age1	age1	age2	age2	age2	age2	age2	age2	age2	age2	age3	age3	age3	age3	age0	age0	age0	age0	age1	age1	age1	age1	age1	age1	age2	age2	age2	age2	age2	age2	age2	age3	age3	age3	age3	age3	age3	age3	age3
Sex	F	F	F	F	F	F	F	F	F	F	F	F	F	F	F	F	F	F	F	F	F	F	F	F	M	M	M	M	M	M	M	M	M	M	M	M	M	M	M	M	M	M	M	M	M	M	M	M	M
																							ELCHO
phylum	elcho01	elcho02	elcho03	elcho04	elcho05	elcho06	elcho07	elcho08	elcho09	elcho10	elcho11	elcho12	elcho13	elcho14	elcho15	elcho16	elcho17	elcho18	elcho19	elcho20	elcho21	elcho22	elcho23	elcho24	elcho25	elcho26	elcho27	elcho28	elcho29	elcho30	elcho31	elcho32	elcho33	elcho34	elcho35	elcho36	elcho37	elcho38	elcho39	elcho40	elcho41	elcho42	elcho43	elcho44	elcho45	elcho46	elcho47	elcho48	elcho49
Firmicutes	1051441	4695527	4895479	925415	350468	3011834	3624193	173661	1238981	3051628	2676912	1562525	3849467	4075803	1230616	4624294	1350787	1979283	2624700	1418279	1748485	4649836	6194744	1733368	10867357	340147	998152	1717704	335625	4335554	1188913	3967576	827549	115420	77795	4120487	1997181	2530337	2505002	1766432	4806662	5585365	1662033	7758521	8844972	3266154	1854115	357310	2108087
Bacteroidota	0	2954134	9184	2296707	5729	0	0	9522619	2907	7323	9375472	165276	4959535	6894694	8874053	8574	5510797	6700326	1208442	11806753	3270691	6299655	4685344	6475455	0	0	6241	0	0	206772	7631968	67431	1647	7600679	473912	5255252	4615097	10983363	7266519	8044261	1168116	4682607	9335248	855	71854	5442894	10311554	6947432	8778717
non-sig
Actinobacteriota	6420519	3403839	3872813	1956233	10387351	3654885	4183180	1816753	8462945	7109292	27950	940672	1392594	7945	2601082	6017187	828998	2400254	21724	68987	1694046	92378	324234	3165067	81726	7416190	8033990	6642637	8706153	3632884	1828388	2122658	1686964	116664	8122451	395012	4797416	505803	481745	480742	5096346	87248	597995	1790999	1269174	1331025	530886	13142	436980
Desulfobacterota	0	0	0	0	0	0	0	0	0	2365	19156	0	0	27729	9028	15293	50578	6338	3167	20688	33916	92212	8242	24719	0	0	0	0	0	0	32431	0	0	0	0	0	29395	0	7265	25948	0	16798	0	0	1083	3273	340	0	18943
Verrucomicrobiota	0	0	0	0	0	0	0	0	0	0	121337	0	14849	24626	0	0	747997	0	10693	229	0	321170	25525	7000	0	0	0	73675	0	326842	0	0	294784	0	0	179588	1432	154196	3835	808775	61762	44223	0	0	0	581074	8718	0	0
Fusobacteriota	0	0	3668	0	0	468	0	0	0	0	0	0	0	0	236	1117	1335	0	0	0	0	0	0	0	0	0	0	9874	0	0	2983	9893	0	0	0	0	0	0	0	3289	57	0	0	11229	16292	750	0	0	0
Patescibacteria	11914	614	4012	0	17863	0	8142	0	0	0	0	0	0	0	0	124	0	0	0	0	0	0	0	0	0	0	79605	0	0	0	0	2310	2058	0	0	47	1014	0	0	0	0	0	0	0	0	0	0	0	0
Cyanobacteria	0	0	0	0	0	0	0	0	0	0	96703	0	0	195687	0	0	0	0	0	0	67793	8759	0	0	0	0	0	0	0	0	0	0	0	0	0	0	0	36946	0	0	0	0	0	0	0	0	0	0	0
Synergistota	0	0	0	0	0	0	0	0	0	0	0	0	0	0	4240	0	0	0	0	0	0	0	0	0	0	0	0	0	0	0	0	0	0	0	0	0	0	0	0	42317	0	29313	0	0	1968	0	0	0	0
Campylobacterota	0	214	263	0	0	7586	0	0	0	0	210338	0	0	25779	0	0	0	0	0	0	8825	0	0	0	0	0	0	0	0	0	257	0	0	0	0	0	0	0	0	0	0	0	101	0	0	0	0	0	0
Proteobacteria	2177288	1158366	792130	150334	636889	4861945	1345146	253116	2118250	572546	14919	443728	667803	33024	9624	1179014	577744	332526	25526	116474	16872	180862	55435	382522	1201055	88939	1478904	1170291	2786688	177799	1970342	1661557	2414145	3264546	119208	1271877	258639	67677	116796	1522303	182773	62185	27634	2164462	788037	131720	1853	71111	862359
[truncated: 65 more columns]

## Sheet: meta
SeqID	Study	Age_days	Sex	Pair	SampleID	Study	Age_days	Age_cat	Sex	Pair	colour
elcho01	elcho	35	F	2	elcho01	elcho	35	age0	F	2	red
elcho02	elcho	35	F	3	elcho02	elcho	35	age0	F	3	red
elcho03	elcho	56	F	5	elcho03	elcho	56	age0	F	5	red
elcho04	elcho	60	F	7	elcho04	elcho	60	age0	F	7	red
elcho05	elcho	100	F	6	elcho05	elcho	100	age0	F	6	red
elcho06	elcho	149	F	11	elcho06	elcho	149	age0	F	11	red
elcho07	elcho	164	F	8	elcho07	elcho	164	age1	F	8	red
elcho08	elcho	166	F	13	elcho08	elcho	166	age1	F	13	red
elcho09	elcho	214	F	15	elcho09	elcho	214	age1	F	15	red
elcho10	elcho	217	F	16	elcho10	elcho	217	age1	F	16	red
elcho11	elcho	245	F	17	elcho11	elcho	245	age1	F	17	red
elcho12	elcho	279	F	21	elcho12	elcho	279	age1	F	21	red
elcho13	elcho	308	F	23	elcho13	elcho	308	age2	F	23	red
elcho14	elcho	311	F	24	elcho14	elcho	311	age2	F	24	red
elcho15	elcho	332	F	25	elcho15	elcho	332	age2	F	25	red
elcho16	elcho	356	F	28	elcho16	elcho	356	age2	F	28	red
elcho17	elcho	367	F	29	elcho17	elcho	367	age2	F	29	red
elcho18	elcho	405	F	35	elcho18	elcho	405	age2	F	35	red
elcho19	elcho	436	F	39	elcho19	elcho	436	age2	F	39	red
elcho20	elcho	441	F	37	elcho20	elcho	441	age2	F	37	red
elcho21	elcho	549	F	45	elcho21	elcho	549	age3	F	45	red
elcho22	elcho	571	F	46	elcho22	elcho	571	age3	F	46	red
elcho23	elcho	594	F	50	elcho23	elcho	594	age3	F	50	red
elcho24	elcho	617	F	49	elcho24	elcho	617	age3	F	49	red
elcho25	elcho	22	M	1	elcho25	elcho	22	age0	M	1	red
elcho26	elcho	47	M	4	elcho26	elcho	47	age0	M	4	red
elcho27	elcho	118	M	10	elcho27	elcho	118	age0	M	10	red
elcho28	elcho	147	M	9	elcho28	elcho	147	age0	M	9	red
elcho29	elcho	160	M	12	elcho29	elcho	160	age1	M	12	red
elcho30	elcho	205	M	14	elcho30	elcho	205	age1	M	14	red
elcho31	elcho	228	M	18	elcho31	elcho	228	age1	M	18	red
elcho32	elcho	240	M	20	elcho32	elcho	240	age1	M	20	red
elcho33	elcho	250	M	19	elcho33	elcho	250	age1	M	19	red
elcho34	elcho	285	M	22	elcho34	elcho	285	age1	M	22	red
elcho35	elcho	329	M	26	elcho35	elcho	329	age2	M	26	red
elcho36	elcho	333	M	31	elcho36	elcho	333	age2	M	31	red
elcho37	elcho	346	M	27	elcho37	elcho	346	age2	M	27	red
elcho38	elcho	374	M	30	elcho38	elcho	374	age2	M	30	red
elcho39	elcho	380	M	32	elcho39	elcho	380	age2	M	32	red
elcho40	elcho	382	M	33	elcho40	elcho	382	age2	M	33	red
elcho41	elcho	431	M	36	elcho41	elcho	431	age2	M	36	red
elcho42	elcho	462	M	40	elcho42	elcho	462	age3	M	40	red
elcho43	elcho	463	M	38	elcho43	elcho	463	age3	M	38	red
elcho44	elcho	476	M	34	elcho44	elcho	476	age3	M	34	red
elcho45	elcho	476	M	41	elcho45	elcho	476	age3	M	41	red
elcho46	elcho	511	M	42	elcho46	elcho	511	age3	M	42	red
elcho47	elcho	511	M	43	elcho47	elcho	511	age3	M	43	red
elcho48	elcho	537	M	44	elcho48	elcho	537	age3	M	44	red
elcho49	elcho	566	M	47	elcho49	elcho	566	age3	M	47	red
elcho50	elcho	567	M	48	elcho50	elcho	567	age3	M	48	red
endia01	endia	16	F	2	endia01	endia	16	age0	F	2	blue
endia02	endia	27	F	3	endia02	endia	27	age0	F	3	blue
endia03	endia	74	F	5	endia03	endia	74	age0	F	5	blue
endia04	endia	84	F	6	endia04	endia	84	age0	F	6	blue
endia05	endia	90	F	7	endia05	endia	90	age0	F	7	blue
endia06	endia	97	F	8	endia06	endia	97	age0	F	8	blue
endia07	endia	163	F	11	endia07	endia	163	age1	F	11	blue
endia08	endia	174	F	13	endia08	endia	174	age1	F	13	blue
endia09	endia	203	F	15	endia09	endia	203	age1	F	15	blue
endia10	endia	223	F	16	endia10	endia	223	age1	F	16	blue
endia11	endia	233	F	17	endia11	endia	233	age1	F	17	blue
endia12	endia	280	F	21	endia12	endia	280	age1	F	21	blue
endia13	endia	306	F	23	endia13	endia	306	age2	F	23	blue
endia14	endia	310	F	24	endia14	endia	310	age2	F	24	blue
endia15	endia	328	F	25	endia15	endia	328	age2	F	25	blue
endia16	endia	364	F	28	endia16	endia	364	age2	F	28	blue
endia17	endia	367	F	29	endia17	endia	367	age2	F	29	blue
endia18	endia	410	F	35	endia18	endia	410	age2	F	35	blue
endia19	endia	440	F	37	endia19	endia	440	age2	F	37	blue
endia20	endia	461	F	39	endia20	endia	461	age3	F	39	blue
endia21	endia	553	F	45	endia21	endia	553	age3	F	45	blue
endia22	endia	565	F	46	endia22	endia	565	age3	F	46	blue
endia23	endia	580	F	49	endia23	endia	580	age3	F	49	blue
endia24	endia	589	F	50	endia24	endia	589	age3	F	50	blue
endia25	endia	13	M	1	endia25	endia	13	age0	M	1	blue
endia26	endia	73	M	4	endia26	endia	73	age0	M	4	blue
endia27	endia	112	M	9	endia27	endia	112	age0	M	9	blue
endia28	endia	120	M	10	endia28	endia	120	age0	M	10	blue
endia29	endia	172	M	12	endia29	endia	172	age1	M	12	blue
endia30	endia	197	M	14	endia30	endia	197	age1	M	14	blue
endia31	endia	235	M	18	endia31	endia	235	age1	M	18	blue
endia32	endia	255	M	19	endia32	endia	255	age1	M	19	blue
endia33	endia	258	M	20	endia33	endia	258	age1	M	20	blue
endia34	endia	283	M	22	endia34	endia	283	age1	M	22	blue
endia35	endia	331	M	26	endia35	endia	331	age2	M	26	blue
endia36	endia	347	M	27	endia36	endia	347	age2	M	27	blue
endia37	endia	375	M	30	endia37	endia	375	age2	M	30	blue
endia38	endia	378	M	31	endia38	endia	378	age2	M	31	blue
endia39	endia	379	M	32	endia39	endia	379	age2	M	32	blue
endia40	endia	393	M	33	endia40	endia	393	age2	M	33	blue
endia41	endia	394	M	34	endia41	endia	394	age2	M	34	blue
endia42	endia	422	M	36	endia42	endia	422	age2	M	36	blue
endia43	endia	458	M	38	endia43	endia	458	age3	M	38	blue
endia44	endia	462	M	40	endia44	endia	462	age3	M	40	blue
endia45	endia	480	M	41	endia45	endia	480	age3	M	41	blue
endia46	endia	506	M	42	endia46	endia	506	age3	M	42	blue
endia47	endia	512	M	43	endia47	endia	512	age3	M	43	blue
endia48	endia	533	M	44	endia48	endia	533	age3	M	44	blue
endia49	endia	566	M	47	endia49	endia	566	age3	M	47	blue
endia50	endia	573	M	48	endia50	endia	573	age3	M	48	blue

## Sheet: taxonomy
d__Bacteria;p__Actinobacteriota;c__Actinomycetia;o__Actinomycetales;f__Actinomycetaceae;g__Pauljensenia;s__Pauljensenia_bouchesdurhonensis	Pauljensenia_bouchesdurhonensis	Pauljensenia
d__Bacteria;p__Actinobacteriota;c__Actinomycetia;o__Actinomycetales;f__Actinomycetaceae;g__Pauljensenia;s__Pauljensenia_culturomici	Pauljensenia_culturomici	Pauljensenia
d__Bacteria;p__Actinobacteriota;c__Actinomycetia;o__Actinomycetales;f__Actinomycetaceae;g__Pauljensenia;s__Pauljensenia_meyeri	Pauljensenia_meyeri	Pauljensenia
d__Bacteria;p__Actinobacteriota;c__Actinomycetia;o__Actinomycetales;f__Actinomycetaceae;g__Pauljensenia;s__Pauljensenia_odontolytica	Pauljensenia_odontolytica	Pauljensenia
d__Bacteria;p__Actinobacteriota;c__Actinomycetia;o__Actinomycetales;f__Actinomycetaceae;g__Pauljensenia;s__Pauljensenia_sp000185285	Pauljensenia_sp000185285	Pauljensenia
d__Bacteria;p__Actinobacteriota;c__Actinomycetia;o__Actinomycetales;f__Actinomycetaceae;g__Pauljensenia;s__Pauljensenia_sp000278725	Pauljensenia_sp000278725	Pauljensenia
d__Bacteria;p__Actinobacteriota;c__Actinomycetia;o__Actinomycetales;f__Actinomycetaceae;g__Pauljensenia;s__Pauljensenia_sp000308055	Pauljensenia_sp000308055	Pauljensenia
d__Bacteria;p__Actinobacteriota;c__Actinomycetia;o__Actinomycetales;f__Actinomycetaceae;g__Pauljensenia;s__Pauljensenia_sp000411415	Pauljensenia_sp000411415	Pauljensenia
d__Bacteria;p__Actinobacteriota;c__Actinomycetia;o__Actinomycetales;f__Actinomycetaceae;g__Pauljensenia;s__Pauljensenia_sp000466265	Pauljensenia_sp000466265	Pauljensenia
d__Bacteria;p__Actinobacteriota;c__Actinomycetia;o__Actinomycetales;f__Actinomycetaceae;g__Pauljensenia;s__Pauljensenia_sp000758755	Pauljensenia_sp000758755	Pauljensenia
d__Bacteria;p__Actinobacteriota;c__Actinomycetia;o__Actinomycetales;f__Actinomycetaceae;g__Pauljensenia;s__Pauljensenia_sp001838165	Pauljensenia_sp001838165	Pauljensenia
d__Bacteria;p__Actinobacteriota;c__Actinomycetia;o__Actinomycetales;f__Actinomycetaceae;g__Pauljensenia;s__Pauljensenia_sp018382595	Pauljensenia_sp018382595	Pauljensenia
d__Bacteria;p__Actinobacteriota;c__Actinomycetia;o__Actinomycetales;f__Actinomycetaceae;g__Pauljensenia;s__Pauljensenia_sp900541895	Pauljensenia_sp900541895	Pauljensenia
d__Bacteria;p__Actinobacteriota;c__Actinomycetia;o__Actinomycetales;f__Actinomycetaceae;g__Pauljensenia;s__Pauljensenia_sp902373545	Pauljensenia_sp902373545	Pauljensenia
d__Bacteria;p__Actinobacteriota;c__Actinomycetia;o__Actinomycetales;f__Actinomycetaceae;g__Pauljensenia;s__Pauljensenia_turicensis	Pauljensenia_turicensis	Pauljensenia
d__Bacteria;p__Actinobacteriota;c__Actinomycetia;o__Actinomycetales;f__Actinomycetaceae;g__Pauljensenia;s__unknown	unknown	unknown
d__Bacteria;p__Actinobacteriota;c__Actinomycetia;o__Actinomycetales;f__Actinomycetaceae;g__Varibaculum;s__Varibaculum_cambriense	Varibaculum_cambriense	Varibaculum
d__Bacteria;p__Actinobacteriota;c__Actinomycetia;o__Actinomycetales;f__Actinomycetaceae;g__Varibaculum;s__Varibaculum_cambriense_A	Varibaculum_cambriense_A	Varibaculum
d__Bacteria;p__Actinobacteriota;c__Actinomycetia;o__Actinomycetales;f__Actinomycetaceae;g__Varibaculum;s__Varibaculum_cambriense_B	Varibaculum_cambriense_B	Varibaculum
d__Bacteria;p__Actinobacteriota;c__Actinomycetia;o__Actinomycetales;f__Actinomycetaceae;g__Varibaculum;s__Varibaculum_massiliense	Varibaculum_massiliense	Varibaculum
d__Bacteria;p__Actinobacteriota;c__Actinomycetia;o__Actinomycetales;f__Actinomycetaceae;g__Varibaculum;s__Varibaculum_timonense_A	Varibaculum_timonense_A	Varibaculum
d__Bacteria;p__Actinobacteriota;c__Actinomycetia;o__Actinomycetales;f__Actinomycetaceae;g__Varibaculum;s__Varibaculum_vaginae	Varibaculum_vaginae	Varibaculum
d__Bacteria;p__Actinobacteriota;c__Actinomycetia;o__Actinomycetales;f__Bifidobacteriaceae;g__Aeriscardovia;s__Aeriscardovia_aeriphila	Aeriscardovia_aeriphila	Aeriscardovia
d__Bacteria;p__Actinobacteriota;c__Actinomycetia;o__Actinomycetales;f__Bifidobacteriaceae;g__Alloscardovia;s__Alloscardovia_criceti	Alloscardovia_criceti	Alloscardovia
d__Bacteria;p__Actinobacteriota;c__Actinomycetia;o__Actinomycetales;f__Bifidobacteriaceae;g__Alloscardovia;s__Alloscardovia_macacae	Alloscardovia_macacae	Alloscardovia
d__Bacteria;p__Actinobacteriota;c__Actinomycetia;o__Actinomycetales;f__Bifidobacteriaceae;g__Bifidobacterium;s__Bifidobacterium_actinocoloniiforme	Bifidobacterium_actinocoloniiforme	Bifidobacterium
d__Bacteria;p__Actinobacteriota;c__Actinomycetia;o__Actinomycetales;f__Bifidobacteriaceae;g__Bifidobacterium;s__Bifidobacterium_adolescentis	Bifidobacterium_adolescentis	Bifidobacterium
d__Bacteria;p__Actinobacteriota;c__Actinomycetia;o__Actinomycetales;f__Bifidobacteriaceae;g__Bifidobacterium;s__Bifidobacterium_aemilianum	Bifidobacterium_aemilianum	Bifidobacterium
d__Bacteria;p__Actinobacteriota;c__Actinomycetia;o__Actinomycetales;f__Bifidobacteriaceae;g__Bifidobacterium;s__Bifidobacterium_aerophilum	Bifidobacterium_aerophilum	Bifidobacterium
d__Bacteria;p__Actinobacteriota;c__Actinomycetia;o__Actinomycetales;f__Bifidobacteriaceae;g__Bifidobacterium;s__Bifidobacterium_aesculapii	Bifidobacterium_aesculapii	Bifidobacterium
d__Bacteria;p__Actinobacteriota;c__Actinomycetia;o__Actinomycetales;f__Bifidobacteriaceae;g__Bifidobacterium;s__Bifidobacterium_angulatum	Bifidobacterium_angulatum	Bifidobacterium
d__Bacteria;p__Actinobacteriota;c__Actinomycetia;o__Actinomycetales;f__Bifidobacteriaceae;g__Bifidobacterium;s__Bifidobacterium_animalis	Bifidobacterium_animalis	Bifidobacterium
d__Bacteria;p__Actinobacteriota;c__Actinomycetia;o__Actinomycetales;f__Bifidobacteriaceae;g__Bifidobacterium;s__Bifidobacterium_biavatii	Bifidobacterium_biavatii	Bifidobacterium
d__Bacteria;p__Actinobacteriota;c__Actinomycetia;o__Actinomycetales;f__Bifidobacteriaceae;g__Bifidobacterium;s__Bifidobacterium_bifidum	Bifidobacterium_bifidum	Bifidobacterium
d__Bacteria;p__Actinobacteriota;c__Actinomycetia;o__Actinomycetales;f__Bifidobacteriaceae;g__Bifidobacterium;s__Bifidobacterium_bohemicum	Bifidobacterium_bohemicum	Bifidobacterium
d__Bacteria;p__Actinobacteriota;c__Actinomycetia;o__Actinomycetales;f__Bifidobacteriaceae;g__Bifidobacterium;s__Bifidobacterium_bombi	Bifidobacterium_bombi	Bifidobacterium
d__Bacteria;p__Actinobacteriota;c__Actinomycetia;o__Actinomycetales;f__Bifidobacteriaceae;g__Bifidobacterium;s__Bifidobacterium_boum	Bifidobacterium_boum	Bifidobacterium
d__Bacteria;p__Actinobacteriota;c__Actinomycetia;o__Actinomycetales;f__Bifidobacteriaceae;g__Bifidobacterium;s__Bifidobacterium_breve	Bifidobacterium_breve	Bifidobacterium
d__Bacteria;p__Actinobacteriota;c__Actinomycetia;o__Actinomycetales;f__Bifidobacteriaceae;g__Bifidobacterium;s__Bifidobacterium_callitrichos	Bifidobacterium_callitrichos	Bifidobacterium
d__Bacteria;p__Actinobacteriota;c__Actinomycetia;o__Actinomycetales;f__Bifidobacteriaceae;g__Bifidobacterium;s__Bifidobacterium_canis	Bifidobacterium_canis	Bifidobacterium
d__Bacteria;p__Actinobacteriota;c__Actinomycetia;o__Actinomycetales;f__Bifidobacteriaceae;g__Bifidobacterium;s__Bifidobacterium_catenulatum	Bifidobacterium_catenulatum	Bifidobacterium
d__Bacteria;p__Actinobacteriota;c__Actinomycetia;o__Actinomycetales;f__Bifidobacteriaceae;g__Bifidobacterium;s__Bifidobacterium_cebidarum	Bifidobacterium_cebidarum	Bifidobacterium
d__Bacteria;p__Actinobacteriota;c__Actinomycetia;o__Actinomycetales;f__Bifidobacteriaceae;g__Bifidobacterium;s__Bifidobacterium_choloepi	Bifidobacterium_choloepi	Bifidobacterium
d__Bacteria;p__Actinobacteriota;c__Actinomycetia;o__Actinomycetales;f__Bifidobacteriaceae;g__Bifidobacterium;s__Bifidobacterium_commune	Bifidobacterium_commune	Bifidobacterium
d__Bacteria;p__Actinobacteriota;c__Actinomycetia;o__Actinomycetales;f__Bifidobacteriaceae;g__Bifidobacterium;s__Bifidobacterium_criceti	Bifidobacterium_criceti	Bifidobacterium
d__Bacteria;p__Actinobacteriota;c__Actinomycetia;o__Actinomycetales;f__Bifidobacteriaceae;g__Bifidobacterium;s__Bifidobacterium_crudilactis	Bifidobacterium_crudilactis	Bifidobacterium
d__Bacteria;p__Actinobacteriota;c__Actinomycetia;o__Actinomycetales;f__Bifidobacteriaceae;g__Bifidobacterium;s__Bifidobacterium_cuniculi	Bifidobacterium_cuniculi	Bifidobacterium
d__Bacteria;p__Actinobacteriota;c__Actinomycetia;o__Actinomycetales;f__Bifidobacteriaceae;g__Bifidobacterium;s__Bifidobacterium_dentium	Bifidobacterium_dentium	Bifidobacterium
d__Bacteria;p__Actinobacteriota;c__Actinomycetia;o__Actinomycetales;f__Bifidobacteriaceae;g__Bifidobacterium;s__Bifidobacterium_dolichotidis	Bifidobacterium_dolichotidis	Bifidobacterium
d__Bacteria;p__Actinobacteriota;c__Actinomycetia;o__Actinomycetales;f__Bifidobacteriaceae;g__Bifidobacterium;s__Bifidobacterium_felsineum	Bifidobacterium_felsineum	Bifidobacterium
d__Bacteria;p__Actinobacteriota;c__Actinomycetia;o__Actinomycetales;f__Bifidobacteriaceae;g__Bifidobacterium;s__Bifidobacterium_gallicum	Bifidobacterium_gallicum	Bifidobacterium
d__Bacteria;p__Actinobacteriota;c__Actinomycetia;o__Actinomycetales;f__Bifidobacteriaceae;g__Bifidobacterium;s__Bifidobacterium_globosum	Bifidobacterium_globosum	Bifidobacterium
d__Bacteria;p__Actinobacteriota;c__Actinomycetia;o__Actinomycetales;f__Bifidobacteriaceae;g__Bifidobacterium;s__Bifidobacterium_goeldii	Bifidobacterium_goeldii	Bifidobacterium
d__Bacteria;p__Actinobacteriota;c__Actinomycetia;o__Actinomycetales;f__Bifidobacteriaceae;g__Bifidobacterium;s__Bifidobacterium_hapali	Bifidobacterium_hapali	Bifidobacterium
d__Bacteria;p__Actinobacteriota;c__Actinomycetia;o__Actinomycetales;f__Bifidobacteriaceae;g__Bifidobacterium;s__Bifidobacterium_indicum	Bifidobacterium_indicum	Bifidobacterium
d__Bacteria;p__Actinobacteriota;c__Actinomycetia;o__Actinomycetales;f__Bifidobacteriaceae;g__Bifidobacterium;s__Bifidobacterium_jacchi	Bifidobacterium_jacchi	Bifidobacterium
d__Bacteria;p__Actinobacteriota;c__Actinomycetia;o__Actinomycetales;f__Bifidobacteriaceae;g__Bifidobacterium;s__Bifidobacterium_lemurum	Bifidobacterium_lemurum	Bifidobacterium
d__Bacteria;p__Actinobacteriota;c__Actinomycetia;o__Actinomycetales;f__Bifidobacteriaceae;g__Bifidobacterium;s__Bifidobacterium_leontopitheci	Bifidobacterium_leontopitheci	Bifidobacterium
d__Bacteria;p__Actinobacteriota;c__Actinomycetia;o__Actinomycetales;f__Bifidobacteriaceae;g__Bifidobacterium;s__Bifidobacterium_longum	Bifidobacterium_longum	Bifidobacterium
d__Bacteria;p__Actinobacteriota;c__Actinomycetia;o__Actinomycetales;f__Bifidobacteriaceae;g__Bifidobacterium;s__Bifidobacterium_magnum	Bifidobacterium_magnum	Bifidobacterium
d__Bacteria;p__Actinobacteriota;c__Actinomycetia;o__Actinomycetales;f__Bifidobacteriaceae;g__Bifidobacterium;s__Bifidobacterium_merycicum	Bifidobacterium_merycicum	Bifidobacterium
d__Bacteria;p__Actinobacteriota;c__Actinomycetia;o__Actinomycetales;f__Bifidobacteriaceae;g__Bifidobacterium;s__Bifidobacterium_minimum	Bifidobacterium_minimum	Bifidobacterium
d__Bacteria;p__Actinobacteriota;c__Actinomycetia;o__Actinomycetales;f__Bifidobacteriaceae;g__Bifidobacterium;s__Bifidobacterium_mongoliense	Bifidobacterium_mongoliense	Bifidobacterium
d__Bacteria;p__Actinobacteriota;c__Actinomycetia;o__Actinomycetales;f__Bifidobacteriaceae;g__Bifidobacterium;s__Bifidobacterium_moukalabense	Bifidobacterium_moukalabense	Bifidobacterium
d__Bacteria;p__Actinobacteriota;c__Actinomycetia;o__Actinomycetales;f__Bifidobacteriaceae;g__Bifidobacterium;s__Bifidobacterium_myosotis	Bifidobacterium_myosotis	Bifidobacterium
d__Bacteria;p__Actinobacteriota;c__Actinomycetia;o__Actinomycetales;f__Bifidobacteriaceae;g__Bifidobacterium;s__Bifidobacterium_pseudocatenulatum	Bifidobacterium_pseudocatenulatum	Bifidobacterium
d__Bacteria;p__Actinobacteriota;c__Actinomycetia;o__Actinomycetales;f__Bifidobacteriaceae;g__Bifidobacterium;s__Bifidobacterium_psychraerophilum	Bifidobacterium_psychraerophilum	Bifidobacterium
d__Bacteria;p__Actinobacteriota;c__Actinomycetia;o__Actinomycetales;f__Bifidobacteriaceae;g__Bifidobacterium;s__Bifidobacterium_pullorum	Bifidobacterium_pullorum	Bifidobacterium
d__Bacteria;p__Actinobacteriota;c__Actinomycetia;o__Actinomycetales;f__Bifidobacteriaceae;g__Bifidobacterium;s__Bifidobacterium_pullorum_B	Bifidobacterium_pullorum_B	Bifidobacterium
d__Bacteria;p__Actinobacteriota;c__Actinomycetia;o__Actinomycetales;f__Bifidobacteriaceae;g__Bifidobacterium;s__Bifidobacterium_pullorum_C	Bifidobacterium_pullorum_C	Bifidobacterium
d__Bacteria;p__Actinobacteriota;c__Actinomycetia;o__Actinomycetales;f__Bifidobacteriaceae;g__Bifidobacterium;s__Bifidobacterium_ramosum	Bifidobacterium_ramosum	Bifidobacterium
d__Bacteria;p__Actinobacteriota;c__Actinomycetia;o__Actinomycetales;f__Bifidobacteriaceae;g__Bifidobacterium;s__Bifidobacterium_reuteri	Bifidobacterium_reuteri	Bifidobacterium
d__Bacteria;p__Actinobacteriota;c__Actinomycetia;o__Actinomycetales;f__Bifidobacteriaceae;g__Bifidobacterium;s__Bifidobacterium_ruminantium	Bifidobacterium_ruminantium	Bifidobacterium
d__Bacteria;p__Actinobacteriota;c__Actinomycetia;o__Actinomycetales;f__Bifidobacteriaceae;g__Bifidobacterium;s__Bifidobacterium_saguini	Bifidobacterium_saguini	Bifidobacterium
d__Bacteria;p__Actinobacteriota;c__Actinomycetia;o__Actinomycetales;f__Bifidobacteriaceae;g__Bifidobacterium;s__Bifidobacterium_scaligerum	Bifidobacterium_scaligerum	Bifidobacterium
d__Bacteria;p__Actinobacteriota;c__Actinomycetia;o__Actinomycetales;f__Bifidobacteriaceae;g__Bifidobacterium;s__Bifidobacterium_scardovii	Bifidobacterium_scardovii	Bifidobacterium
d__Bacteria;p__Actinobacteriota;c__Actinomycetia;o__Actinomycetales;f__Bifidobacteriaceae;g__Bifidobacterium;s__Bifidobacterium_sp002298605	Bifidobacterium_sp002298605	Bifidobacterium
d__Bacteria;p__Actinobacteriota;c__Actinomycetia;o__Actinomycetales;f__Bifidobacteriaceae;g__Bifidobacterium;s__Bifidobacterium_sp002451435	Bifidobacterium_sp002451435	Bifidobacterium
d__Bacteria;p__Actinobacteriota;c__Actinomycetia;o__Actinomycetales;f__Bifidobacteriaceae;g__Bifidobacterium;s__Bifidobacterium_sp012932365	Bifidobacterium_sp012932365	Bifidobacterium
d__Bacteria;p__Actinobacteriota;c__Actinomycetia;o__Actinomycetales;f__Bifidobacteriaceae;g__Bifidobacterium;s__Bifidobacterium_sp012932425	Bifidobacterium_sp012932425	Bifidobacterium
d__Bacteria;p__Actinobacteriota;c__Actinomycetia;o__Actinomycetales;f__Bifidobacteriaceae;g__Bifidobacterium;s__Bifidobacterium_sp012932445	Bifidobacterium_sp012932445	Bifidobacterium
d__Bacteria;p__Actinobacteriota;c__Actinomycetia;o__Actinomycetales;f__Bifidobacteriaceae;g__Bifidobacterium;s__Bifidobacterium_sp012932675	Bifidobacterium_sp012932675	Bifidobacterium
d__Bacteria;p__Actinobacteriota;c__Actinomycetia;o__Actinomycetales;f__Bifidobacteriaceae;g__Bifidobacterium;s__Bifidobacterium_sp018555335	Bifidobacterium_sp018555335	Bifidobacterium
d__Bacteria;p__Actinobacteriota;c__Actinomycetia;o__Actinomycetales;f__Bifidobacteriaceae;g__Bifidobacterium;s__Bifidobacterium_sp018555355	Bifidobacterium_sp018555355	Bifidobacterium
d__Bacteria;p__Actinobacteriota;c__Actinomycetia;o__Actinomycetales;f__Bifidobacteriaceae;g__Bifidobacterium;s__Bifidobacterium_sp018555455	Bifidobacterium_sp018555455	Bifidobacterium
d__Bacteria;p__Actinobacteriota;c__Actinomycetia;o__Actinomycetales;f__Bifidobacteriaceae;g__Bifidobacterium;s__Bifidobacterium_sp018555635	Bifidobacterium_sp018555635	Bifidobacterium
d__Bacteria;p__Actinobacteriota;c__Actinomycetia;o__Actinomycetales;f__Bifidobacteriaceae;g__Bifidobacterium;s__Bifidobacterium_stellenboschense	Bifidobacterium_stellenboschense	Bifidobacterium
d__Bacteria;p__Actinobacteriota;c__Actinomycetia;o__Actinomycetales;f__Bifidobacteriaceae;g__Bifidobacterium;s__Bifidobacterium_subtile	Bifidobacterium_subtile	Bifidobacterium
d__Bacteria;p__Actinobacteriota;c__Actinomycetia;o__Actinomycetales;f__Bifidobacteriaceae;g__Bifidobacterium;s__Bifidobacterium_thermophilum	Bifidobacterium_thermophilum	Bifidobacterium
d__Bacteria;p__Actinobacteriota;c__Actinomycetia;o__Actinomycetales;f__Bifidobacteriaceae;g__Bifidobacterium;s__Bifidobacterium_tsurumiense	Bifidobacterium_tsurumiense	Bifidobacterium
d__Bacteria;p__Actinobacteriota;c__Actinomycetia;o__Actinomycetales;f__Bifidobacteriaceae;g__Bifidobacterium;s__Bifidobacterium_vespertilionis	Bifidobacterium_vespertilionis	Bifidobacterium
d__Bacteria;p__Actinobacteriota;c__Actinomycetia;o__Actinomycetales;f__Bifidobacteriaceae;g__Bifidobacterium;s__Bifidobacterium_xylocopae	Bifidobacterium_xylocopae	Bifidobacterium
d__Bacteria;p__Actinobacteriota;c__Actinomycetia;o__Actinomycetales;f__Bifidobacteriaceae;g__Bifidobacterium;s__unknown	unknown	unknown
d__Bacteria;p__Actinobacteriota;c__Actinomycetia;o__Actinomycetales;f__Bifidobacteriaceae;g__Galliscardovia;s__Galliscardovia_catulorum	Galliscardovia_catulorum	Galliscardovia
d__Bacteria;p__Actinobacteriota;c__Actinomycetia;o__Actinomycetales;f__Bifidobacteriaceae;g__Galliscardovia;s__Galliscardovia_margollesii	Galliscardovia_margollesii	Galliscardovia
d__Bacteria;p__Actinobacteriota;c__Actinomycetia;o__Actinomycetales;f__Bifidobacteriaceae;g__Galliscardovia;s__Galliscardovia_primatium	Galliscardovia_primatium	Galliscardovia
d__Bacteria;p__Actinobacteriota;c__Actinomycetia;o__Actinomycetales;f__Bifidobacteriaceae;g__Galliscardovia;s__Galliscardovia_simiarum	Galliscardovia_simiarum	Galliscardovia
d__Bacteria;p__Actinobacteriota;c__Actinomycetia;o__Actinomycetales;f__Bifidobacteriaceae;g__Galliscardovia;s__Galliscardovia_tissieri	Galliscardovia_tissieri	Galliscardovia
d__Bacteria;p__Actinobacteriota;c__Actinomycetia;o__Actinomycetales;f__Bifidobacteriaceae;g__Parascardovia;s__Parascardovia_denticolens	Parascardovia_denticolens	Parascardovia
d__Bacteria;p__Actinobacteriota;c__Actinomycetia;o__Actinomycetales;f__Bifidobacteriaceae;g__Pseudoscardovia;s__Pseudoscardovia_radai	Pseudoscardovia_radai	Pseudoscardovia
d__Bacteria;p__Actinobacteriota;c__Actinomycetia;o__Actinomycetales;f__Bifidobacteriaceae;g__Pseudoscardovia;s__Pseudoscardovia_suis	Pseudoscardovia_suis	Pseudoscardovia
d__Bacteria;p__Actinobacteriota;c__Actinomycetia;o__Actinomycetales;f__Micrococcaceae;g__Rothia;s__Rothia_aeria	Rothia_aeria	Rothia
d__Bacteria;p__Actinobacteriota;c__Actinomycetia;o__Actinomycetales;f__Micrococcaceae;g__Rothia;s__Rothia_aerolata	Rothia_aerolata	Rothia
d__Bacteria;p__Actinobacteriota;c__Actinomycetia;o__Actinomycetales;f__Micrococcaceae;g__Rothia;s__Rothia_mucilaginosa	Rothia_mucilaginosa	Rothia
d__Bacteria;p__Actinobacteriota;c__Actinomycetia;o__Actinomycetales;f__Micrococcaceae;g__Rothia;s__Rothia_mucilaginosa_A	Rothia_mucilaginosa_A	Rothia
d__Bacteria;p__Actinobacteriota;c__Actinomycetia;o__Actinomycetales;f__Micrococcaceae;g__Rothia;s__Rothia_sp016924835	Rothia_sp016924835	Rothia
d__Bacteria;p__Actinobacteriota;c__Actinomycetia;o__Actinomycetales;f__Micrococcaceae;g__Rothia;s__Rothia_sp902373285	Rothia_sp902373285	Rothia
d__Bacteria;p__Actinobacteriota;c__Actinomycetia;o__Actinomycetales;f__Micrococcaceae;g__Rothia;s__Rothia_terrae	Rothia_terrae	Rothia
d__Bacteria;p__Actinobacteriota;c__Actinomycetia;o__Actinomycetales;f__Micrococcaceae;g__Rothia;s__unknown	unknown	unknown
d__Bacteria;p__Actinobacteriota;c__Actinomycetia;o__Propionibacteriales;f__Propionibacteriaceae;g__Cutibacterium;s__Cutibacterium_avidum	Cutibacterium_avidum	Cutibacterium
d__Bacteria;p__Actinobacteriota;c__Actinomycetia;o__Propionibacteriales;f__Propionibacteriaceae;g__Cutibacterium;s__Cutibacterium_porci	Cutibacterium_porci	Cutibacterium
d__Bacteria;p__Actinobacteriota;c__Coriobacteriia;o__Coriobacteriales;f__Atopobiaceae;g__;s__unknown	unknown	unknown
d__Bacteria;p__Actinobacteriota;c__Coriobacteriia;o__Coriobacteriales;f__Atopobiaceae;g__Lancefieldella;s__Lancefieldella_parvula	Lancefieldella_parvula	Lancefieldella
d__Bacteria;p__Actinobacteriota;c__Coriobacteriia;o__Coriobacteriales;f__Atopobiaceae;g__Lancefieldella;s__Lancefieldella_sp000564995	Lancefieldella_sp000564995	Lancefieldella
d__Bacteria;p__Actinobacteriota;c__Coriobacteriia;o__Coriobacteriales;f__Atopobiaceae;g__Olsenella;s__Olsenella_uli	Olsenella_uli	Olsenella
d__Bacteria;p__Actinobacteriota;c__Coriobacteriia;o__Coriobacteriales;f__Atopobiaceae;g__Olsenella_F;s__Olsenella_F_massiliensis	Olsenella_F_massiliensis	Olsenella
d__Bacteria;p__Actinobacteriota;c__Coriobacteriia;o__Coriobacteriales;f__Atopobiaceae;g__Olsenella_F;s__Olsenella_F_profusa_A	Olsenella_F_profusa_A	Olsenella
d__Bacteria;p__Actinobacteriota;c__Coriobacteriia;o__Coriobacteriales;f__Atopobiaceae;g__Olsenella_G;s__Olsenella_G_urininfantis	Olsenella_G_urininfantis	Olsenella
d__Bacteria;p__Actinobacteriota;c__Coriobacteriia;o__Coriobacteriales;f__Atopobiaceae;g__Olsenella_H;s__Olsenella_H_porci	Olsenella_H_porci	Olsenella
d__Bacteria;p__Actinobacteriota;c__Coriobacteriia;o__Coriobacteriales;f__Atopobiaceae;g__Olsenella_I;s__Olsenella_I_phocaeensis	Olsenella_I_phocaeensis	Olsenella
d__Bacteria;p__Actinobacteriota;c__Coriobacteriia;o__Coriobacteriales;f__Atopobiaceae;g__Parafannyhessea;s__Parafannyhessea_sp902787335	Parafannyhessea_sp902787335	Parafannyhessea
d__Bacteria;p__Actinobacteriota;c__Coriobacteriia;o__Coriobacteriales;f__Atopobiaceae;g__Parafannyhessea;s__Parafannyhessea_umbonata_A	Parafannyhessea_umbonata_A	Parafannyhessea
d__Bacteria;p__Actinobacteriota;c__Coriobacteriia;o__Coriobacteriales;f__Atopobiaceae;g__Paratractidigestivibacter;s__Paratractidigestivibacter_faecalis	Paratractidigestivibacter_faecalis	Paratractidigestivibacter
d__Bacteria;p__Actinobacteriota;c__Coriobacteriia;o__Coriobacteriales;f__Atopobiaceae;g__Paratractidigestivibacter;s__Paratractidigestivibacter_sp003150175	Paratractidigestivibacter_sp003150175	Paratractidigestivibacter
d__Bacteria;p__Actinobacteriota;c__Coriobacteriia;o__Coriobacteriales;f__Atopobiaceae;g__Parolsenella;s__Parolsenella_catena	Parolsenella_catena	Parolsenella
d__Bacteria;p__Actinobacteriota;c__Coriobacteriia;o__Coriobacteriales;f__Atopobiaceae;g__Parolsenella;s__Parolsenella_massiliensis	Parolsenella_massiliensis	Parolsenella
d__Bacteria;p__Actinobacteriota;c__Coriobacteriia;o__Coriobacteriales;f__Atopobiaceae;g__Parolsenella;s__Parolsenella_sp900543875	Parolsenella_sp900543875	Parolsenella
d__Bacteria;p__Actinobacteriota;c__Coriobacteriia;o__Coriobacteriales;f__Atopobiaceae;g__Parolsenella;s__Parolsenella_uli_A	Parolsenella_uli_A	Parolsenella
d__Bacteria;p__Actinobacteriota;c__Coriobacteriia;o__Coriobacteriales;f__Atopobiaceae;g__Parolsenella;s__Parolsenella_uli_B	Parolsenella_uli_B	Parolsenella
d__Bacteria;p__Actinobacteriota;c__Coriobacteriia;o__Coriobacteriales;f__Atopobiaceae;g__Parolsenella;s__unknown	unknown	unknown
d__Bacteria;p__Actinobacteriota;c__Coriobacteriia;o__Coriobacteriales;f__Atopobiaceae;g__Thermophilibacter;s__Thermophilibacter_sp002407785	Thermophilibacter_sp002407785	Thermophilibacter
d__Bacteria;p__Actinobacteriota;c__Coriobacteriia;o__Coriobacteriales;f__Atopobiaceae;g__Thermophilibacter;s__unknown	unknown	unknown
d__Bacteria;p__Actinobacteriota;c__Coriobacteriia;o__Coriobacteriales;f__Atopobiaceae;g__UBA1367;s__UBA1367_sp902772435	UBA1367_sp902772435	UBA1367
d__Bacteria;p__Actinobacteriota;c__Coriobacteriia;o__Coriobacteriales;f__Atopobiaceae;g__UBA7741;s__UBA7741_sp900314575	UBA7741_sp900314575	UBA7741
d__Bacteria;p__Actinobacteriota;c__Coriobacteriia;o__Coriobacteriales;f__Atopobiaceae;g__UBA7748;s__UBA7748_sp003862175	UBA7748_sp003862175	UBA7748
d__Bacteria;p__Actinobacteriota;c__Coriobacteriia;o__Coriobacteriales;f__Coriobacteriaceae;g__Collinsella;s__Collinsella_bouchesdurhonensis	Collinsella_bouchesdurhonensis	Collinsella
d__Bacteria;p__Actinobacteriota;c__Coriobacteriia;o__Coriobacteriales;f__Coriobacteriaceae;g__Collinsella;s__Collinsella_ihuae	Collinsella_ihuae	Collinsella
d__Bacteria;p__Actinobacteriota;c__Coriobacteriia;o__Coriobacteriales;f__Coriobacteriaceae;g__Collinsella;s__Collinsella_intestinalis	Collinsella_intestinalis	Collinsella
d__Bacteria;p__Actinobacteriota;c__Coriobacteriia;o__Coriobacteriales;f__Coriobacteriaceae;g__Collinsella;s__Collinsella_provencensis	Collinsella_provencensis	Collinsella
d__Bacteria;p__Actinobacteriota;c__Coriobacteriia;o__Coriobacteriales;f__Coriobacteriaceae;g__Collinsella;s__Collinsella_sp003458415	Collinsella_sp003458415	Collinsella
d__Bacteria;p__Actinobacteriota;c__Coriobacteriia;o__Coriobacteriales;f__Coriobacteriaceae;g__Collinsella;s__Collinsella_sp008014645	Collinsella_sp008014645	Collinsella
d__Bacteria;p__Actinobacteriota;c__Coriobacteriia;o__Coriobacteriales;f__Coriobacteriaceae;g__Collinsella;s__Collinsella_sp900540845	Collinsella_sp900540845	Collinsella
d__Bacteria;p__Actinobacteriota;c__Coriobacteriia;o__Coriobacteriales;f__Coriobacteriaceae;g__Collinsella;s__Collinsella_sp900548365	Collinsella_sp900548365	Collinsella
d__Bacteria;p__Actinobacteriota;c__Coriobacteriia;o__Coriobacteriales;f__Coriobacteriaceae;g__Collinsella;s__Collinsella_sp900555555	Collinsella_sp900555555	Collinsella
d__Bacteria;p__Actinobacteriota;c__Coriobacteriia;o__Coriobacteriales;f__Coriobacteriaceae;g__Collinsella;s__Collinsella_sp900556495	Collinsella_sp900556495	Collinsella
d__Bacteria;p__Actinobacteriota;c__Coriobacteriia;o__Coriobacteriales;f__Coriobacteriaceae;g__Collinsella;s__Collinsella_sp900768795	Collinsella_sp900768795	Collinsella
d__Bacteria;p__Actinobacteriota;c__Coriobacteriia;o__Coriobacteriales;f__Coriobacteriaceae;g__Collinsella;s__Collinsella_stercoripullorum	Collinsella_stercoripullorum	Collinsella
d__Bacteria;p__Actinobacteriota;c__Coriobacteriia;o__Coriobacteriales;f__Coriobacteriaceae;g__Collinsella;s__Collinsella_stercoris	Collinsella_stercoris	Collinsella
d__Bacteria;p__Actinobacteriota;c__Coriobacteriia;o__Coriobacteriales;f__Coriobacteriaceae;g__Collinsella;s__Collinsella_tanakaei	Collinsella_tanakaei	Collinsella
d__Bacteria;p__Actinobacteriota;c__Coriobacteriia;o__Coriobacteriales;f__Coriobacteriaceae;g__Collinsella;s__Collinsella_tanakaei_A	Collinsella_tanakaei_A	Collinsella
d__Bacteria;p__Actinobacteriota;c__Coriobacteriia;o__Coriobacteriales;f__Coriobacteriaceae;g__Collinsella;s__Collinsella_vaginalis	Collinsella_vaginalis	Collinsella
d__Bacteria;p__Actinobacteriota;c__Coriobacteriia;o__Coriobacteriales;f__Coriobacteriaceae;g__Collinsella;s__unknown	unknown	unknown
d__Bacteria;p__Actinobacteriota;c__Coriobacteriia;o__Coriobacteriales;f__Coriobacteriaceae;g__Coprousia;s__Coprousia_sp002159335	Coprousia_sp002159335	Coprousia
d__Bacteria;p__Actinobacteriota;c__Coriobacteriia;o__Coriobacteriales;f__Coriobacteriaceae;g__Coprousia;s__Coprousia_sp002159765	Coprousia_sp002159765	Coprousia
d__Bacteria;p__Actinobacteriota;c__Coriobacteriia;o__Coriobacteriales;f__Coriobacteriaceae;g__Coprousia;s__Coprousia_sp002161805	Coprousia_sp002161805	Coprousia
d__Bacteria;p__Actinobacteriota;c__Coriobacteriia;o__Coriobacteriales;f__Coriobacteriaceae;g__Coriobacterium;s__Coriobacterium_glomerans	Coriobacterium_glomerans	Coriobacterium
d__Bacteria;p__Actinobacteriota;c__Coriobacteriia;o__Coriobacteriales;f__Coriobacteriaceae;g__Enorma;s__Enorma_sp000333815	Enorma_sp000333815	Enorma
d__Bacteria;p__Actinobacteriota;c__Coriobacteriia;o__Coriobacteriales;f__Coriobacteriaceae;g__Limicola;s__Limicola_phocaeensis_A	Limicola_phocaeensis_A	Limicola
d__Bacteria;p__Actinobacteriota;c__Coriobacteriia;o__Coriobacteriales;f__Coriobacteriaceae;g__Limicola;s__Limicola_sp002160065	Limicola_sp002160065	Limicola
d__Bacteria;p__Actinobacteriota;c__Coriobacteriia;o__Coriobacteriales;f__Eggerthellaceae;g__;s__unknown	unknown	unknown
d__Bacteria;p__Actinobacteriota;c__Coriobacteriia;o__Coriobacteriales;f__Eggerthellaceae;g__Adlercreutzia;s__Adlercreutzia_celatus_A	Adlercreutzia_celatus_A	Adlercreutzia
d__Bacteria;p__Actinobacteriota;c__Coriobacteriia;o__Coriobacteriales;f__Eggerthellaceae;g__Adlercreutzia;s__Adlercreutzia_equolifaciens	Adlercreutzia_equolifaciens	Adlercreutzia
d__Bacteria;p__Actinobacteriota;c__Coriobacteriia;o__Coriobacteriales;f__Eggerthellaceae;g__Berryella;s__Berryella_sp013201155	Berryella_sp013201155	Berryella
d__Bacteria;p__Actinobacteriota;c__Coriobacteriia;o__Coriobacteriales;f__Eggerthellaceae;g__CAAEEV01;s__CAAEEV01_sp900754955	CAAEEV01_sp900754955	CAAEEV01
d__Bacteria;p__Actinobacteriota;c__Coriobacteriia;o__Coriobacteriales;f__Eggerthellaceae;g__CAJFUR01;s__CAJFUR01_sp904420575	CAJFUR01_sp904420575	CAJFUR01
d__Bacteria;p__Actinobacteriota;c__Coriobacteriia;o__Coriobacteriales;f__Eggerthellaceae;g__Eggerthella;s__Eggerthella_lenta	Eggerthella_lenta	Eggerthella
d__Bacteria;p__Actinobacteriota;c__Coriobacteriia;o__Coriobacteriales;f__Eggerthellaceae;g__Eggerthella;s__Eggerthella_sinensis	Eggerthella_sinensis	Eggerthella
d__Bacteria;p__Actinobacteriota;c__Coriobacteriia;o__Coriobacteriales;f__Eggerthellaceae;g__Eggerthella;s__Eggerthella_sp014287365	Eggerthella_sp014287365	Eggerthella
d__Bacteria;p__Actinobacteriota;c__Coriobacteriia;o__Coriobacteriales;f__Eggerthellaceae;g__Eggerthella;s__Eggerthella_timonensis	Eggerthella_timonensis	Eggerthella
d__Bacteria;p__Actinobacteriota;c__Coriobacteriia;o__Coriobacteriales;f__Eggerthellaceae;g__Ellagibacter;s__Ellagibacter_isourolithinifaciens	Ellagibacter_isourolithinifaciens	Ellagibacter
d__Bacteria;p__Actinobacteriota;c__Coriobacteriia;o__Coriobacteriales;f__Eggerthellaceae;g__Enteroscipio;s__Enteroscipio_rubneri	Enteroscipio_rubneri	Enteroscipio
d__Bacteria;p__Actinobacteriota;c__Coriobacteriia;o__Coriobacteriales;f__Eggerthellaceae;g__Enteroscipio;s__Enteroscipio_sp000270285	Enteroscipio_sp000270285	Enteroscipio
d__Bacteria;p__Actinobacteriota;c__Coriobacteriia;o__Coriobacteriales;f__Eggerthellaceae;g__Enteroscipio;s__unknown	unknown	unknown
d__Bacteria;p__Actinobacteriota;c__Coriobacteriia;o__Coriobacteriales;f__Eggerthellaceae;g__Gordonibacter;s__Gordonibacter_pamelaeae	Gordonibacter_pamelaeae	Gordonibacter
d__Bacteria;p__Actinobacteriota;c__Coriobacteriia;o__Coriobacteriales;f__Eggerthellaceae;g__Paraeggerthella;s__Paraeggerthella_hongkongensis	Paraeggerthella_hongkongensis	Paraeggerthella
d__Bacteria;p__Actinobacteriota;c__Coriobacteriia;o__Coriobacteriales;f__Eggerthellaceae;g__Paraeggerthella;s__Paraeggerthella_hongkongensis_A	Paraeggerthella_hongkongensis_A	Paraeggerthella
d__Bacteria;p__Actinobacteriota;c__Coriobacteriia;o__Coriobacteriales;f__Eggerthellaceae;g__Parvibacter;s__Parvibacter_caecicola	Parvibacter_caecicola	Parvibacter
d__Bacteria;p__Actinobacteriota;c__Coriobacteriia;o__Coriobacteriales;f__Eggerthellaceae;g__QWKK01;s__QWKK01_sp009911695	QWKK01_sp009911695	QWKK01
d__Bacteria;p__Actinobacteriota;c__Coriobacteriia;o__Coriobacteriales;f__Eggerthellaceae;g__Rubneribacter;s__Rubneribacter_badeniensis	Rubneribacter_badeniensis	Rubneribacter
d__Bacteria;p__Actinobacteriota;c__Coriobacteriia;o__Coriobacteriales;f__Eggerthellaceae;g__Senegalimassilia;s__Senegalimassilia_anaerobia	Senegalimassilia_anaerobia	Senegalimassilia
d__Bacteria;p__Actinobacteriota;c__Coriobacteriia;o__Coriobacteriales;f__Eggerthellaceae;g__Senegalimassilia;s__Senegalimassilia_faecalis	Senegalimassilia_faecalis	Senegalimassilia
d__Bacteria;p__Actinobacteriota;c__Coriobacteriia;o__Coriobacteriales;f__Eggerthellaceae;g__Senegalimassilia;s__Senegalimassilia_sp900550055	Senegalimassilia_sp900550055	Senegalimassilia
d__Bacteria;p__Actinobacteriota;c__Coriobacteriia;o__Coriobacteriales;f__Eggerthellaceae;g__Slackia_A;s__Slackia_A_equolifaciens	Slackia_A_equolifaciens	Slackia
d__Bacteria;p__Actinobacteriota;c__Coriobacteriia;o__Coriobacteriales;f__Eggerthellaceae;g__Slackia_A;s__Slackia_A_isoflavoniconvertens	Slackia_A_isoflavoniconvertens	Slackia
d__Bacteria;p__Actinobacteriota;c__Coriobacteriia;o__Coriobacteriales;f__Eggerthellaceae;g__ZJ141;s__ZJ141_sp011038965	ZJ141_sp011038965	ZJ141
d__Bacteria;p__Actinobacteriota;c__Coriobacteriia;o__Coriobacteriales;f__QAMH01;g__CACZQA01;s__unknown	unknown	unknown
d__Bacteria;p__Actinobacteriota;c__Coriobacteriia;o__Coriobacteriales;f__UMGS124;g__CAIFEU01;s__CAIFEU01_sp902783515	CAIFEU01_sp902783515	CAIFEU01
d__Bacteria;p__Bacteroidota;c__Bacteroidia;o__Bacteroidales;f__Bacteroidaceae;g__Alloprevotella;s__Alloprevotella_sp000437675	Alloprevotella_sp000437675	Alloprevotella
d__Bacteria;p__Bacteroidota;c__Bacteroidia;o__Bacteroidales;f__Bacteroidaceae;g__Alloprevotella;s__Alloprevotella_sp000438115	Alloprevotella_sp000438115	Alloprevotella
d__Bacteria;p__Bacteroidota;c__Bacteroidia;o__Bacteroidales;f__Bacteroidaceae;g__Alloprevotella;s__Alloprevotella_sp004552155	Alloprevotella_sp004552155	Alloprevotella
d__Bacteria;p__Bacteroidota;c__Bacteroidia;o__Bacteroidales;f__Bacteroidaceae;g__Alloprevotella;s__Alloprevotella_sp004552865	Alloprevotella_sp004552865	Alloprevotella
d__Bacteria;p__Bacteroidota;c__Bacteroidia;o__Bacteroidales;f__Bacteroidaceae;g__Alloprevotella;s__Alloprevotella_sp004555425	Alloprevotella_sp004555425	Alloprevotella
d__Bacteria;p__Bacteroidota;c__Bacteroidia;o__Bacteroidales;f__Bacteroidaceae;g__Alloprevotella;s__Alloprevotella_sp900316575	Alloprevotella_sp900316575	Alloprevotella
d__Bacteria;p__Bacteroidota;c__Bacteroidia;o__Bacteroidales;f__Bacteroidaceae;g__Alloprevotella;s__Alloprevotella_sp900317635	Alloprevotella_sp900317635	Alloprevotella
d__Bacteria;p__Bacteroidota;c__Bacteroidia;o__Bacteroidales;f__Bacteroidaceae;g__Alloprevotella;s__Alloprevotella_sp900539625	Alloprevotella_sp900539625	Alloprevotella
d__Bacteria;p__Bacteroidota;c__Bacteroidia;o__Bacteroidales;f__Bacteroidaceae;g__Alloprevotella;s__Alloprevotella_sp900540885	Alloprevotella_sp900540885	Alloprevotella
d__Bacteria;p__Bacteroidota;c__Bacteroidia;o__Bacteroidales;f__Bacteroidaceae;g__Alloprevotella;s__Alloprevotella_sp900541575	Alloprevotella_sp900541575	Alloprevotella
d__Bacteria;p__Bacteroidota;c__Bacteroidia;o__Bacteroidales;f__Bacteroidaceae;g__Alloprevotella;s__Alloprevotella_sp900546605	Alloprevotella_sp900546605	Alloprevotella
d__Bacteria;p__Bacteroidota;c__Bacteroidia;o__Bacteroidales;f__Bacteroidaceae;g__Alloprevotella;s__Alloprevotella_sp900768625	Alloprevotella_sp900768625	Alloprevotella
d__Bacteria;p__Bacteroidota;c__Bacteroidia;o__Bacteroidales;f__Bacteroidaceae;g__Alloprevotella;s__Alloprevotella_tannerae	Alloprevotella_tannerae	Alloprevotella
d__Bacteria;p__Bacteroidota;c__Bacteroidia;o__Bacteroidales;f__Bacteroidaceae;g__Alloprevotella;s__Alloprevotella_timonensis	Alloprevotella_timonensis	Alloprevotella
d__Bacteria;p__Bacteroidota;c__Bacteroidia;o__Bacteroidales;f__Bacteroidaceae;g__Alloprevotella;s__unknown	unknown	unknown
d__Bacteria;p__Bacteroidota;c__Bacteroidia;o__Bacteroidales;f__Bacteroidaceae;g__Bacteroides;s__Bacteroides_acidifaciens	Bacteroides_acidifaciens	Bacteroides
d__Bacteria;p__Bacteroidota;c__Bacteroidia;o__Bacteroidales;f__Bacteroidaceae;g__Bacteroides;s__Bacteroides_avicola	Bacteroides_avicola	Bacteroides
d__Bacteria;p__Bacteroidota;c__Bacteroidia;o__Bacteroidales;f__Bacteroidaceae;g__Bacteroides;s__Bacteroides_caccae	Bacteroides_caccae	Bacteroides
d__Bacteria;p__Bacteroidota;c__Bacteroidia;o__Bacteroidales;f__Bacteroidaceae;g__Bacteroides;s__Bacteroides_caecimuris	Bacteroides_caecimuris	Bacteroides
d__Bacteria;p__Bacteroidota;c__Bacteroidia;o__Bacteroidales;f__Bacteroidaceae;g__Bacteroides;s__Bacteroides_cellulosilyticus	Bacteroides_cellulosilyticus	Bacteroides
d__Bacteria;p__Bacteroidota;c__Bacteroidia;o__Bacteroidales;f__Bacteroidaceae;g__Bacteroides;s__Bacteroides_clarus	Bacteroides_clarus	Bacteroides
d__Bacteria;p__Bacteroidota;c__Bacteroidia;o__Bacteroidales;f__Bacteroidaceae;g__Bacteroides;s__Bacteroides_congonensis	Bacteroides_congonensis	Bacteroides
d__Bacteria;p__Bacteroidota;c__Bacteroidia;o__Bacteroidales;f__Bacteroidaceae;g__Bacteroides;s__Bacteroides_cutis	Bacteroides_cutis	Bacteroides
d__Bacteria;p__Bacteroidota;c__Bacteroidia;o__Bacteroidales;f__Bacteroidaceae;g__Bacteroides;s__Bacteroides_eggerthii	Bacteroides_eggerthii	Bacteroides
d__Bacteria;p__Bacteroidota;c__Bacteroidia;o__Bacteroidales;f__Bacteroidaceae;g__Bacteroides;s__Bacteroides_faecalis	Bacteroides_faecalis	Bacteroides
d__Bacteria;p__Bacteroidota;c__Bacteroidia;o__Bacteroidales;f__Bacteroidaceae;g__Bacteroides;s__Bacteroides_faecichinchillae	Bacteroides_faecichinchillae	Bacteroides
d__Bacteria;p__Bacteroidota;c__Bacteroidia;o__Bacteroidales;f__Bacteroidaceae;g__Bacteroides;s__Bacteroides_faecis	Bacteroides_faecis	Bacteroides
d__Bacteria;p__Bacteroidota;c__Bacteroidia;o__Bacteroidales;f__Bacteroidaceae;g__Bacteroides;s__Bacteroides_finegoldii	Bacteroides_finegoldii	Bacteroides
d__Bacteria;p__Bacteroidota;c__Bacteroidia;o__Bacteroidales;f__Bacteroidaceae;g__Bacteroides;s__Bacteroides_fluxus	Bacteroides_fluxus	Bacteroides
d__Bacteria;p__Bacteroidota;c__Bacteroidia;o__Bacteroidales;f__Bacteroidaceae;g__Bacteroides;s__Bacteroides_fragilis	Bacteroides_fragilis	Bacteroides
d__Bacteria;p__Bacteroidota;c__Bacteroidia;o__Bacteroidales;f__Bacteroidaceae;g__Bacteroides;s__Bacteroides_fragilis_A	Bacteroides_fragilis_A	Bacteroides
d__Bacteria;p__Bacteroidota;c__Bacteroidia;o__Bacteroidales;f__Bacteroidaceae;g__Bacteroides;s__Bacteroides_gallinarum	Bacteroides_gallinarum	Bacteroides
d__Bacteria;p__Bacteroidota;c__Bacteroidia;o__Bacteroidales;f__Bacteroidaceae;g__Bacteroides;s__Bacteroides_graminisolvens	Bacteroides_graminisolvens	Bacteroides
d__Bacteria;p__Bacteroidota;c__Bacteroidia;o__Bacteroidales;f__Bacteroidaceae;g__Bacteroides;s__Bacteroides_helcogenes	Bacteroides_helcogenes	Bacteroides
d__Bacteria;p__Bacteroidota;c__Bacteroidia;o__Bacteroidales;f__Bacteroidaceae;g__Bacteroides;s__Bacteroides_heparinolyticus	Bacteroides_heparinolyticus	Bacteroides
d__Bacteria;p__Bacteroidota;c__Bacteroidia;o__Bacteroidales;f__Bacteroidaceae;g__Bacteroides;s__Bacteroides_ihuae	Bacteroides_ihuae	Bacteroides
d__Bacteria;p__Bacteroidota;c__Bacteroidia;o__Bacteroidales;f__Bacteroidaceae;g__Bacteroides;s__Bacteroides_intestinalis	Bacteroides_intestinalis	Bacteroides
d__Bacteria;p__Bacteroidota;c__Bacteroidia;o__Bacteroidales;f__Bacteroidaceae;g__Bacteroides;s__Bacteroides_intestinalis_A	Bacteroides_intestinalis_A	Bacteroides
d__Bacteria;p__Bacteroidota;c__Bacteroidia;o__Bacteroidales;f__Bacteroidaceae;g__Bacteroides;s__Bacteroides_massiliensis	Bacteroides_massiliensis	Bacteroides
d__Bacteria;p__Bacteroidota;c__Bacteroidia;o__Bacteroidales;f__Bacteroidaceae;g__Bacteroides;s__Bacteroides_massiliensis_B	Bacteroides_massiliensis_B	Bacteroides
d__Bacteria;p__Bacteroidota;c__Bacteroidia;o__Bacteroidales;f__Bacteroidaceae;g__Bacteroides;s__Bacteroides_ndongoniae	Bacteroides_ndongoniae	Bacteroides
d__Bacteria;p__Bacteroidota;c__Bacteroidia;o__Bacteroidales;f__Bacteroidaceae;g__Bacteroides;s__Bacteroides_neonati	Bacteroides_neonati	Bacteroides
d__Bacteria;p__Bacteroidota;c__Bacteroidia;o__Bacteroidales;f__Bacteroidaceae;g__Bacteroides;s__Bacteroides_nordii	Bacteroides_nordii	Bacteroides
d__Bacteria;p__Bacteroidota;c__Bacteroidia;o__Bacteroidales;f__Bacteroidaceae;g__Bacteroides;s__Bacteroides_oleiciplenus	Bacteroides_oleiciplenus	Bacteroides
d__Bacteria;p__Bacteroidota;c__Bacteroidia;o__Bacteroidales;f__Bacteroidaceae;g__Bacteroides;s__Bacteroides_ovatus	Bacteroides_ovatus	Bacteroides
d__Bacteria;p__Bacteroidota;c__Bacteroidia;o__Bacteroidales;f__Bacteroidaceae;g__Bacteroides;s__Bacteroides_pyogenes	Bacteroides_pyogenes	Bacteroides
d__Bacteria;p__Bacteroidota;c__Bacteroidia;o__Bacteroidales;f__Bacteroidaceae;g__Bacteroides;s__Bacteroides_reticulotermitis	Bacteroides_reticulotermitis	Bacteroides
d__Bacteria;p__Bacteroidota;c__Bacteroidia;o__Bacteroidales;f__Bacteroidaceae;g__Bacteroides;s__Bacteroides_rodentium	Bacteroides_rodentium	Bacteroides
d__Bacteria;p__Bacteroidota;c__Bacteroidia;o__Bacteroidales;f__Bacteroidaceae;g__Bacteroides;s__Bacteroides_salyersiae	Bacteroides_salyersiae	Bacteroides
d__Bacteria;p__Bacteroidota;c__Bacteroidia;o__Bacteroidales;f__Bacteroidaceae;g__Bacteroides;s__Bacteroides_sp002491635	Bacteroides_sp002491635	Bacteroides
d__Bacteria;p__Bacteroidota;c__Bacteroidia;o__Bacteroidales;f__Bacteroidaceae;g__Bacteroides;s__Bacteroides_sp003545565	Bacteroides_sp003545565	Bacteroides
d__Bacteria;p__Bacteroidota;c__Bacteroidia;o__Bacteroidales;f__Bacteroidaceae;g__Bacteroides;s__Bacteroides_sp007896885	Bacteroides_sp007896885	Bacteroides
d__Bacteria;p__Bacteroidota;c__Bacteroidia;o__Bacteroidales;f__Bacteroidaceae;g__Bacteroides;s__Bacteroides_sp014385165	Bacteroides_sp014385165	Bacteroides
d__Bacteria;p__Bacteroidota;c__Bacteroidia;o__Bacteroidales;f__Bacteroidaceae;g__Bacteroides;s__Bacteroides_sp900553815	Bacteroides_sp900553815	Bacteroides
d__Bacteria;p__Bacteroidota;c__Bacteroidia;o__Bacteroidales;f__Bacteroidaceae;g__Bacteroides;s__Bacteroides_sp900556215	Bacteroides_sp900556215	Bacteroides
d__Bacteria;p__Bacteroidota;c__Bacteroidia;o__Bacteroidales;f__Bacteroidaceae;g__Bacteroides;s__Bacteroides_sp900765785	Bacteroides_sp900765785	Bacteroides
d__Bacteria;p__Bacteroidota;c__Bacteroidia;o__Bacteroidales;f__Bacteroidaceae;g__Bacteroides;s__Bacteroides_sp900766005	Bacteroides_sp900766005	Bacteroides
d__Bacteria;p__Bacteroidota;c__Bacteroidia;o__Bacteroidales;f__Bacteroidaceae;g__Bacteroides;s__Bacteroides_sp902388495	Bacteroides_sp902388495	Bacteroides
d__Bacteria;p__Bacteroidota;c__Bacteroidia;o__Bacteroidales;f__Bacteroidaceae;g__Bacteroides;s__Bacteroides_sp910578895	Bacteroides_sp910578895	Bacteroides
d__Bacteria;p__Bacteroidota;c__Bacteroidia;o__Bacteroidales;f__Bacteroidaceae;g__Bacteroides;s__Bacteroides_sp910585845	Bacteroides_sp910585845	Bacteroides
d__Bacteria;p__Bacteroidota;c__Bacteroidia;o__Bacteroidales;f__Bacteroidaceae;g__Bacteroides;s__Bacteroides_sp910586915	Bacteroides_sp910586915	Bacteroides
d__Bacteria;p__Bacteroidota;c__Bacteroidia;o__Bacteroidales;f__Bacteroidaceae;g__Bacteroides;s__Bacteroides_stercorirosoris	Bacteroides_stercorirosoris	Bacteroides
d__Bacteria;p__Bacteroidota;c__Bacteroidia;o__Bacteroidales;f__Bacteroidaceae;g__Bacteroides;s__Bacteroides_stercoris	Bacteroides_stercoris	Bacteroides
d__Bacteria;p__Bacteroidota;c__Bacteroidia;o__Bacteroidales;f__Bacteroidaceae;g__Bacteroides;s__Bacteroides_thetaiotaomicron	Bacteroides_thetaiotaomicron	Bacteroides
d__Bacteria;p__Bacteroidota;c__Bacteroidia;o__Bacteroidales;f__Bacteroidaceae;g__Bacteroides;s__Bacteroides_timonensis	Bacteroides_timonensis	Bacteroides
d__Bacteria;p__Bacteroidota;c__Bacteroidia;o__Bacteroidales;f__Bacteroidaceae;g__Bacteroides;s__Bacteroides_togonis	Bacteroides_togonis	Bacteroides
d__Bacteria;p__Bacteroidota;c__Bacteroidia;o__Bacteroidales;f__Bacteroidaceae;g__Bacteroides;s__Bacteroides_uniformis	Bacteroides_uniformis	Bacteroides
d__Bacteria;p__Bacteroidota;c__Bacteroidia;o__Bacteroidales;f__Bacteroidaceae;g__Bacteroides;s__Bacteroides_xylanisolvens	Bacteroides_xylanisolvens	Bacteroides
d__Bacteria;p__Bacteroidota;c__Bacteroidia;o__Bacteroidales;f__Bacteroidaceae;g__Bacteroides;s__Bacteroides_zoogleoformans	Bacteroides_zoogleoformans	Bacteroides
d__Bacteria;p__Bacteroidota;c__Bacteroidia;o__Bacteroidales;f__Bacteroidaceae;g__Bacteroides;s__unknown	unknown	unknown
d__Bacteria;p__Bacteroidota;c__Bacteroidia;o__Bacteroidales;f__Bacteroidaceae;g__Bacteroides_E;s__Bacteroides_E_coprosuis	Bacteroides_E_coprosuis	Bacteroides
d__Bacteria;p__Bacteroidota;c__Bacteroidia;o__Bacteroidales;f__Bacteroidaceae;g__Bacteroides_E;s__Bacteroides_E_propionicifaciens	Bacteroides_E_propionicifaciens	Bacteroides
d__Bacteria;p__Bacteroidota;c__Bacteroidia;o__Bacteroidales;f__Bacteroidaceae;g__Bacteroides_G;s__Bacteroides_G_luti	Bacteroides_G_luti	Bacteroides
d__Bacteria;p__Bacteroidota;c__Bacteroidia;o__Bacteroidales;f__Bacteroidaceae;g__Bacteroides_H;s__Bacteroides_H_sp010500955	Bacteroides_H_sp010500955	Bacteroides
d__Bacteria;p__Bacteroidota;c__Bacteroidia;o__Bacteroidales;f__Bacteroidaceae;g__Bacteroides_H;s__Bacteroides_H_sp010500965	Bacteroides_H_sp010500965	Bacteroides
d__Bacteria;p__Bacteroidota;c__Bacteroidia;o__Bacteroidales;f__Bacteroidaceae;g__Bacteroides_H;s__Bacteroides_H_sp010500995	Bacteroides_H_sp010500995	Bacteroides
d__Bacteria;p__Bacteroidota;c__Bacteroidia;o__Bacteroidales;f__Bacteroidaceae;g__Bacteroides_H;s__Bacteroides_H_sp010501015	Bacteroides_H_sp010501015	Bacteroides
d__Bacteria;p__Bacteroidota;c__Bacteroidia;o__Bacteroidales;f__Bacteroidaceae;g__HGM04593;s__HGM04593_sp900770655	HGM04593_sp900770655	HGM04593
d__Bacteria;p__Bacteroidota;c__Bacteroidia;o__Bacteroidales;f__Bacteroidaceae;g__OM05-12;s__OM05-12_sp003438995	OM05-12_sp003438995	OM05-12
d__Bacteria;p__Bacteroidota;c__Bacteroidia;o__Bacteroidales;f__Bacteroidaceae;g__Paraprevotella;s__Paraprevotella_sp003477995	Paraprevotella_sp003477995	Paraprevotella
d__Bacteria;p__Bacteroidota;c__Bacteroidia;o__Bacteroidales;f__Bacteroidaceae;g__Paraprevotella;s__Paraprevotella_stercorigallinarum	Paraprevotella_stercorigallinarum	Paraprevotella
d__Bacteria;p__Bacteroidota;c__Bacteroidia;o__Bacteroidales;f__Bacteroidaceae;g__Paraprevotella;s__unknown	unknown	unknown
d__Bacteria;p__Bacteroidota;c__Bacteroidia;o__Bacteroidales;f__Bacteroidaceae;g__Phocaeicola;s__Phocaeicola_abscessus	Phocaeicola_abscessus	Phocaeicola
d__Bacteria;p__Bacteroidota;c__Bacteroidia;o__Bacteroidales;f__Bacteroidaceae;g__Phocaeicola;s__Phocaeicola_barnesiae	Phocaeicola_barnesiae	Phocaeicola
d__Bacteria;p__Bacteroidota;c__Bacteroidia;o__Bacteroidales;f__Bacteroidaceae;g__Phocaeicola;s__Phocaeicola_caecigallinarum_A	Phocaeicola_caecigallinarum_A	Phocaeicola
d__Bacteria;p__Bacteroidota;c__Bacteroidia;o__Bacteroidales;f__Bacteroidaceae;g__Phocaeicola;s__Phocaeicola_coprocola	Phocaeicola_coprocola	Phocaeicola
d__Bacteria;p__Bacteroidota;c__Bacteroidia;o__Bacteroidales;f__Bacteroidaceae;g__Phocaeicola;s__Phocaeicola_coprophilus	Phocaeicola_coprophilus	Phocaeicola
d__Bacteria;p__Bacteroidota;c__Bacteroidia;o__Bacteroidales;f__Bacteroidaceae;g__Phocaeicola;s__Phocaeicola_dorei	Phocaeicola_dorei	Phocaeicola
d__Bacteria;p__Bacteroidota;c__Bacteroidia;o__Bacteroidales;f__Bacteroidaceae;g__Phocaeicola;s__Phocaeicola_excrementipullorum	Phocaeicola_excrementipullorum	Phocaeicola
d__Bacteria;p__Bacteroidota;c__Bacteroidia;o__Bacteroidales;f__Bacteroidaceae;g__Phocaeicola;s__Phocaeicola_faecipullorum_A	Phocaeicola_faecipullorum_A	Phocaeicola
d__Bacteria;p__Bacteroidota;c__Bacteroidia;o__Bacteroidales;f__Bacteroidaceae;g__Phocaeicola;s__Phocaeicola_gallinaceus	Phocaeicola_gallinaceus	Phocaeicola
d__Bacteria;p__Bacteroidota;c__Bacteroidia;o__Bacteroidales;f__Bacteroidaceae;g__Phocaeicola;s__Phocaeicola_ilei	Phocaeicola_ilei	Phocaeicola
d__Bacteria;p__Bacteroidota;c__Bacteroidia;o__Bacteroidales;f__Bacteroidaceae;g__Phocaeicola;s__Phocaeicola_massiliensis	Phocaeicola_massiliensis	Phocaeicola
d__Bacteria;p__Bacteroidota;c__Bacteroidia;o__Bacteroidales;f__Bacteroidaceae;g__Phocaeicola;s__Phocaeicola_merdavium	Phocaeicola_merdavium	Phocaeicola
d__Bacteria;p__Bacteroidota;c__Bacteroidia;o__Bacteroidales;f__Bacteroidaceae;g__Phocaeicola;s__Phocaeicola_merdigallinarum	Phocaeicola_merdigallinarum	Phocaeicola
d__Bacteria;p__Bacteroidota;c__Bacteroidia;o__Bacteroidales;f__Bacteroidaceae;g__Phocaeicola;s__Phocaeicola_paurosaccharolyticus	Phocaeicola_paurosaccharolyticus	Phocaeicola
d__Bacteria;p__Bacteroidota;c__Bacteroidia;o__Bacteroidales;f__Bacteroidaceae;g__Phocaeicola;s__Phocaeicola_plebeius	Phocaeicola_plebeius	Phocaeicola
d__Bacteria;p__Bacteroidota;c__Bacteroidia;o__Bacteroidales;f__Bacteroidaceae;g__Phocaeicola;s__Phocaeicola_salanitronis	Phocaeicola_salanitronis	Phocaeicola
d__Bacteria;p__Bacteroidota;c__Bacteroidia;o__Bacteroidales;f__Bacteroidaceae;g__Phocaeicola;s__Phocaeicola_sartorii	Phocaeicola_sartorii	Phocaeicola
d__Bacteria;p__Bacteroidota;c__Bacteroidia;o__Bacteroidales;f__Bacteroidaceae;g__Phocaeicola;s__Phocaeicola_sp000432735	Phocaeicola_sp000432735	Phocaeicola
d__Bacteria;p__Bacteroidota;c__Bacteroidia;o__Bacteroidales;f__Bacteroidaceae;g__Phocaeicola;s__Phocaeicola_sp000434735	Phocaeicola_sp000434735	Phocaeicola
d__Bacteria;p__Bacteroidota;c__Bacteroidia;o__Bacteroidales;f__Bacteroidaceae;g__Phocaeicola;s__Phocaeicola_sp000436795	Phocaeicola_sp000436795	Phocaeicola
d__Bacteria;p__Bacteroidota;c__Bacteroidia;o__Bacteroidales;f__Bacteroidaceae;g__Phocaeicola;s__Phocaeicola_sp002493165	Phocaeicola_sp002493165	Phocaeicola
d__Bacteria;p__Bacteroidota;c__Bacteroidia;o__Bacteroidales;f__Bacteroidaceae;g__Phocaeicola;s__Phocaeicola_sp900066445	Phocaeicola_sp900066445	Phocaeicola
d__Bacteria;p__Bacteroidota;c__Bacteroidia;o__Bacteroidales;f__Bacteroidaceae;g__Phocaeicola;s__Phocaeicola_sp900540105	Phocaeicola_sp900540105	Phocaeicola
d__Bacteria;p__Bacteroidota;c__Bacteroidia;o__Bacteroidales;f__Bacteroidaceae;g__Phocaeicola;s__Phocaeicola_sp900541515	Phocaeicola_sp900541515	Phocaeicola
d__Bacteria;p__Bacteroidota;c__Bacteroidia;o__Bacteroidales;f__Bacteroidaceae;g__Phocaeicola;s__Phocaeicola_sp900542985	Phocaeicola_sp900542985	Phocaeicola
d__Bacteria;p__Bacteroidota;c__Bacteroidia;o__Bacteroidales;f__Bacteroidaceae;g__Phocaeicola;s__Phocaeicola_sp900544075	Phocaeicola_sp900544075	Phocaeicola
d__Bacteria;p__Bacteroidota;c__Bacteroidia;o__Bacteroidales;f__Bacteroidaceae;g__Phocaeicola;s__Phocaeicola_sp900546645	Phocaeicola_sp900546645	Phocaeicola
d__Bacteria;p__Bacteroidota;c__Bacteroidia;o__Bacteroidales;f__Bacteroidaceae;g__Phocaeicola;s__Phocaeicola_sp900551445	Phocaeicola_sp900551445	Phocaeicola
d__Bacteria;p__Bacteroidota;c__Bacteroidia;o__Bacteroidales;f__Bacteroidaceae;g__Phocaeicola;s__Phocaeicola_sp900551645	Phocaeicola_sp900551645	Phocaeicola
d__Bacteria;p__Bacteroidota;c__Bacteroidia;o__Bacteroidales;f__Bacteroidaceae;g__Phocaeicola;s__Phocaeicola_sp900553185	Phocaeicola_sp900553185	Phocaeicola
d__Bacteria;p__Bacteroidota;c__Bacteroidia;o__Bacteroidales;f__Bacteroidaceae;g__Phocaeicola;s__Phocaeicola_sp902779535	Phocaeicola_sp902779535	Phocaeicola
d__Bacteria;p__Bacteroidota;c__Bacteroidia;o__Bacteroidales;f__Bacteroidaceae;g__Phocaeicola;s__Phocaeicola_sp905198575	Phocaeicola_sp905198575	Phocaeicola
d__Bacteria;p__Bacteroidota;c__Bacteroidia;o__Bacteroidales;f__Bacteroidaceae;g__Phocaeicola;s__Phocaeicola_vulgatus	Phocaeicola_vulgatus	Phocaeicola
d__Bacteria;p__Bacteroidota;c__Bacteroidia;o__Bacteroidales;f__Bacteroidaceae;g__Phocaeicola;s__unknown	unknown	unknown
d__Bacteria;p__Bacteroidota;c__Bacteroidia;o__Bacteroidales;f__Bacteroidaceae;g__Phocaeicola_A;s__Phocaeicola_A_sp003489705	Phocaeicola_A_sp003489705	Phocaeicola
d__Bacteria;p__Bacteroidota;c__Bacteroidia;o__Bacteroidales;f__Bacteroidaceae;g__Phocaeicola_A;s__Phocaeicola_A_sp900291465	Phocaeicola_A_sp900291465	Phocaeicola
d__Bacteria;p__Bacteroidota;c__Bacteroidia;o__Bacteroidales;f__Bacteroidaceae;g__Phocaeicola_A;s__unknown	unknown	unknown
d__Bacteria;p__Bacteroidota;c__Bacteroidia;o__Bacteroidales;f__Bacteroidaceae;g__Prevotella;s__Prevotella_albensis	Prevotella_albensis	Prevotella
d__Bacteria;p__Bacteroidota;c__Bacteroidia;o__Bacteroidales;f__Bacteroidaceae;g__Prevotella;s__Prevotella_avicola	Prevotella_avicola	Prevotella
d__Bacteria;p__Bacteroidota;c__Bacteroidia;o__Bacteroidales;f__Bacteroidaceae;g__Prevotella;s__Prevotella_baroniae	Prevotella_baroniae	Prevotella
d__Bacteria;p__Bacteroidota;c__Bacteroidia;o__Bacteroidales;f__Bacteroidaceae;g__Prevotella;s__Prevotella_bergensis	Prevotella_bergensis	Prevotella
d__Bacteria;p__Bacteroidota;c__Bacteroidia;o__Bacteroidales;f__Bacteroidaceae;g__Prevotella;s__Prevotella_bivia	Prevotella_bivia	Prevotella
d__Bacteria;p__Bacteroidota;c__Bacteroidia;o__Bacteroidales;f__Bacteroidaceae;g__Prevotella;s__Prevotella_brevis	Prevotella_brevis	Prevotella
d__Bacteria;p__Bacteroidota;c__Bacteroidia;o__Bacteroidales;f__Bacteroidaceae;g__Prevotella;s__Prevotella_brunnea	Prevotella_brunnea	Prevotella
d__Bacteria;p__Bacteroidota;c__Bacteroidia;o__Bacteroidales;f__Bacteroidaceae;g__Prevotella;s__Prevotella_bryantii	Prevotella_bryantii	Prevotella
d__Bacteria;p__Bacteroidota;c__Bacteroidia;o__Bacteroidales;f__Bacteroidaceae;g__Prevotella;s__Prevotella_buccae	Prevotella_buccae	Prevotella
d__Bacteria;p__Bacteroidota;c__Bacteroidia;o__Bacteroidales;f__Bacteroidaceae;g__Prevotella;s__Prevotella_buccalis	Prevotella_buccalis	Prevotella
d__Bacteria;p__Bacteroidota;c__Bacteroidia;o__Bacteroidales;f__Bacteroidaceae;g__Prevotella;s__Prevotella_copri	Prevotella_copri	Prevotella
d__Bacteria;p__Bacteroidota;c__Bacteroidia;o__Bacteroidales;f__Bacteroidaceae;g__Prevotella;s__Prevotella_copri_A	Prevotella_copri_A	Prevotella
d__Bacteria;p__Bacteroidota;c__Bacteroidia;o__Bacteroidales;f__Bacteroidaceae;g__Prevotella;s__Prevotella_corporis	Prevotella_corporis	Prevotella
d__Bacteria;p__Bacteroidota;c__Bacteroidia;o__Bacteroidales;f__Bacteroidaceae;g__Prevotella;s__Prevotella_dentasini	Prevotella_dentasini	Prevotella
d__Bacteria;p__Bacteroidota;c__Bacteroidia;o__Bacteroidales;f__Bacteroidaceae;g__Prevotella;s__Prevotella_enoeca	Prevotella_enoeca	Prevotella
d__Bacteria;p__Bacteroidota;c__Bacteroidia;o__Bacteroidales;f__Bacteroidaceae;g__Prevotella;s__Prevotella_fusca	Prevotella_fusca	Prevotella
d__Bacteria;p__Bacteroidota;c__Bacteroidia;o__Bacteroidales;f__Bacteroidaceae;g__Prevotella;s__Prevotella_hominis	Prevotella_hominis	Prevotella
d__Bacteria;p__Bacteroidota;c__Bacteroidia;o__Bacteroidales;f__Bacteroidaceae;g__Prevotella;s__Prevotella_ihumii	Prevotella_ihumii	Prevotella
d__Bacteria;p__Bacteroidota;c__Bacteroidia;o__Bacteroidales;f__Bacteroidaceae;g__Prevotella;s__Prevotella_lascolaii	Prevotella_lascolaii	Prevotella
d__Bacteria;p__Bacteroidota;c__Bacteroidia;o__Bacteroidales;f__Bacteroidaceae;g__Prevotella;s__Prevotella_maculosa	Prevotella_maculosa	Prevotella
d__Bacteria;p__Bacteroidota;c__Bacteroidia;o__Bacteroidales;f__Bacteroidaceae;g__Prevotella;s__Prevotella_marshii	Prevotella_marshii	Prevotella
d__Bacteria;p__Bacteroidota;c__Bacteroidia;o__Bacteroidales;f__Bacteroidaceae;g__Prevotella;s__Prevotella_multiformis	Prevotella_multiformis	Prevotella
d__Bacteria;p__Bacteroidota;c__Bacteroidia;o__Bacteroidales;f__Bacteroidaceae;g__Prevotella;s__Prevotella_multisaccharivorax	Prevotella_multisaccharivorax	Prevotella
d__Bacteria;p__Bacteroidota;c__Bacteroidia;o__Bacteroidales;f__Bacteroidaceae;g__Prevotella;s__Prevotella_oralis	Prevotella_oralis	Prevotella
d__Bacteria;p__Bacteroidota;c__Bacteroidia;o__Bacteroidales;f__Bacteroidaceae;g__Prevotella;s__Prevotella_oris	Prevotella_oris	Prevotella
d__Bacteria;p__Bacteroidota;c__Bacteroidia;o__Bacteroidales;f__Bacteroidaceae;g__Prevotella;s__Prevotella_oryzae	Prevotella_oryzae	Prevotella
d__Bacteria;p__Bacteroidota;c__Bacteroidia;o__Bacteroidales;f__Bacteroidaceae;g__Prevotella;s__Prevotella_pectinovora	Prevotella_pectinovora	Prevotella
d__Bacteria;p__Bacteroidota;c__Bacteroidia;o__Bacteroidales;f__Bacteroidaceae;g__Prevotella;s__Prevotella_rara	Prevotella_rara	Prevotella
d__Bacteria;p__Bacteroidota;c__Bacteroidia;o__Bacteroidales;f__Bacteroidaceae;g__Prevotella;s__Prevotella_seregens	Prevotella_seregens	Prevotella
d__Bacteria;p__Bacteroidota;c__Bacteroidia;o__Bacteroidales;f__Bacteroidaceae;g__Prevotella;s__Prevotella_sp000424185	Prevotella_sp000424185	Prevotella
d__Bacteria;p__Bacteroidota;c__Bacteroidia;o__Bacteroidales;f__Bacteroidaceae;g__Prevotella;s__Prevotella_sp000431975	Prevotella_sp000431975	Prevotella
d__Bacteria;p__Bacteroidota;c__Bacteroidia;o__Bacteroidales;f__Bacteroidaceae;g__Prevotella;s__Prevotella_sp000433175	Prevotella_sp000433175	Prevotella
d__Bacteria;p__Bacteroidota;c__Bacteroidia;o__Bacteroidales;f__Bacteroidaceae;g__Prevotella;s__Prevotella_sp000434975	Prevotella_sp000434975	Prevotella
d__Bacteria;p__Bacteroidota;c__Bacteroidia;o__Bacteroidales;f__Bacteroidaceae;g__Prevotella;s__Prevotella_sp000436035	Prevotella_sp000436035	Prevotella
d__Bacteria;p__Bacteroidota;c__Bacteroidia;o__Bacteroidales;f__Bacteroidaceae;g__Prevotella;s__Prevotella_sp000436915	Prevotella_sp000436915	Prevotella
d__Bacteria;p__Bacteroidota;c__Bacteroidia;o__Bacteroidales;f__Bacteroidaceae;g__Prevotella;s__Prevotella_sp000688375	Prevotella_sp000688375	Prevotella
d__Bacteria;p__Bacteroidota;c__Bacteroidia;o__Bacteroidales;f__Bacteroidaceae;g__Prevotella;s__Prevotella_sp001552765	Prevotella_sp001552765	Prevotella
d__Bacteria;p__Bacteroidota;c__Bacteroidia;o__Bacteroidales;f__Bacteroidaceae;g__Prevotella;s__Prevotella_sp001553265	Prevotella_sp001553265	Prevotella
d__Bacteria;p__Bacteroidota;c__Bacteroidia;o__Bacteroidales;f__Bacteroidaceae;g__Prevotella;s__Prevotella_sp002251245	Prevotella_sp002251245	Prevotella
d__Bacteria;p__Bacteroidota;c__Bacteroidia;o__Bacteroidales;f__Bacteroidaceae;g__Prevotella;s__Prevotella_sp002251295	Prevotella_sp002251295	Prevotella
d__Bacteria;p__Bacteroidota;c__Bacteroidia;o__Bacteroidales;f__Bacteroidaceae;g__Prevotella;s__Prevotella_sp002251365	Prevotella_sp002251365	Prevotella
d__Bacteria;p__Bacteroidota;c__Bacteroidia;o__Bacteroidales;f__Bacteroidaceae;g__Prevotella;s__Prevotella_sp002251385	Prevotella_sp002251385	Prevotella
d__Bacteria;p__Bacteroidota;c__Bacteroidia;o__Bacteroidales;f__Bacteroidaceae;g__Prevotella;s__Prevotella_sp002251435	Prevotella_sp002251435	Prevotella
d__Bacteria;p__Bacteroidota;c__Bacteroidia;o__Bacteroidales;f__Bacteroidaceae;g__Prevotella;s__Prevotella_sp002265625	Prevotella_sp002265625	Prevotella
d__Bacteria;p__Bacteroidota;c__Bacteroidia;o__Bacteroidales;f__Bacteroidaceae;g__Prevotella;s__Prevotella_sp002297965	Prevotella_sp002297965	Prevotella
d__Bacteria;p__Bacteroidota;c__Bacteroidia;o__Bacteroidales;f__Bacteroidaceae;g__Prevotella;s__Prevotella_sp002299635	Prevotella_sp002299635	Prevotella
d__Bacteria;p__Bacteroidota;c__Bacteroidia;o__Bacteroidales;f__Bacteroidaceae;g__Prevotella;s__Prevotella_sp002300055	Prevotella_sp002300055	Prevotella
d__Bacteria;p__Bacteroidota;c__Bacteroidia;o__Bacteroidales;f__Bacteroidaceae;g__Prevotella;s__Prevotella_sp002342665	Prevotella_sp002342665	Prevotella
d__Bacteria;p__Bacteroidota;c__Bacteroidia;o__Bacteroidales;f__Bacteroidaceae;g__Prevotella;s__Prevotella_sp002350805	Prevotella_sp002350805	Prevotella
d__Bacteria;p__Bacteroidota;c__Bacteroidia;o__Bacteroidales;f__Bacteroidaceae;g__Prevotella;s__Prevotella_sp002353295	Prevotella_sp002353295	Prevotella
d__Bacteria;p__Bacteroidota;c__Bacteroidia;o__Bacteroidales;f__Bacteroidaceae;g__Prevotella;s__Prevotella_sp002353555	Prevotella_sp002353555	Prevotella
d__Bacteria;p__Bacteroidota;c__Bacteroidia;o__Bacteroidales;f__Bacteroidaceae;g__Prevotella;s__Prevotella_sp002353585	Prevotella_sp002353585	Prevotella
d__Bacteria;p__Bacteroidota;c__Bacteroidia;o__Bacteroidales;f__Bacteroidaceae;g__Prevotella;s__Prevotella_sp002353975	Prevotella_sp002353975	Prevotella
d__Bacteria;p__Bacteroidota;c__Bacteroidia;o__Bacteroidales;f__Bacteroidaceae;g__Prevotella;s__Prevotella_sp002354095	Prevotella_sp002354095	Prevotella
d__Bacteria;p__Bacteroidota;c__Bacteroidia;o__Bacteroidales;f__Bacteroidaceae;g__Prevotella;s__Prevotella_sp002372575	Prevotella_sp002372575	Prevotella
d__Bacteria;p__Bacteroidota;c__Bacteroidia;o__Bacteroidales;f__Bacteroidaceae;g__Prevotella;s__Prevotella_sp002373375	Prevotella_sp002373375	Prevotella
d__Bacteria;p__Bacteroidota;c__Bacteroidia;o__Bacteroidales;f__Bacteroidaceae;g__Prevotella;s__Prevotella_sp002391185	Prevotella_sp002391185	Prevotella
d__Bacteria;p__Bacteroidota;c__Bacteroidia;o__Bacteroidales;f__Bacteroidaceae;g__Prevotella;s__Prevotella_sp002392645	Prevotella_sp002392645	Prevotella
d__Bacteria;p__Bacteroidota;c__Bacteroidia;o__Bacteroidales;f__Bacteroidaceae;g__Prevotella;s__Prevotella_sp002395135	Prevotella_sp002395135	Prevotella
d__Bacteria;p__Bacteroidota;c__Bacteroidia;o__Bacteroidales;f__Bacteroidaceae;g__Prevotella;s__Prevotella_sp002437285	Prevotella_sp002437285	Prevotella
d__Bacteria;p__Bacteroidota;c__Bacteroidia;o__Bacteroidales;f__Bacteroidaceae;g__Prevotella;s__Prevotella_sp002437565	Prevotella_sp002437565	Prevotella
d__Bacteria;p__Bacteroidota;c__Bacteroidia;o__Bacteroidales;f__Bacteroidaceae;g__Prevotella;s__Prevotella_sp002439605	Prevotella_sp002439605	Prevotella
d__Bacteria;p__Bacteroidota;c__Bacteroidia;o__Bacteroidales;f__Bacteroidaceae;g__Prevotella;s__Prevotella_sp002440225	Prevotella_sp002440225	Prevotella
d__Bacteria;p__Bacteroidota;c__Bacteroidia;o__Bacteroidales;f__Bacteroidaceae;g__Prevotella;s__Prevotella_sp002451555	Prevotella_sp002451555	Prevotella
d__Bacteria;p__Bacteroidota;c__Bacteroidia;o__Bacteroidales;f__Bacteroidaceae;g__Prevotella;s__Prevotella_sp002479145	Prevotella_sp002479145	Prevotella
d__Bacteria;p__Bacteroidota;c__Bacteroidia;o__Bacteroidales;f__Bacteroidaceae;g__Prevotella;s__Prevotella_sp002480935	Prevotella_sp002480935	Prevotella
d__Bacteria;p__Bacteroidota;c__Bacteroidia;o__Bacteroidales;f__Bacteroidaceae;g__Prevotella;s__Prevotella_sp003043945	Prevotella_sp003043945	Prevotella
d__Bacteria;p__Bacteroidota;c__Bacteroidia;o__Bacteroidales;f__Bacteroidaceae;g__Prevotella;s__Prevotella_sp003447235	Prevotella_sp003447235	Prevotella
d__Bacteria;p__Bacteroidota;c__Bacteroidia;o__Bacteroidales;f__Bacteroidaceae;g__Prevotella;s__Prevotella_sp003932845	Prevotella_sp003932845	Prevotella
d__Bacteria;p__Bacteroidota;c__Bacteroidia;o__Bacteroidales;f__Bacteroidaceae;g__Prevotella;s__Prevotella_sp004556065	Prevotella_sp004556065	Prevotella
d__Bacteria;p__Bacteroidota;c__Bacteroidia;o__Bacteroidales;f__Bacteroidaceae;g__Prevotella;s__Prevotella_sp013166605	Prevotella_sp013166605	Prevotella
d__Bacteria;p__Bacteroidota;c__Bacteroidia;o__Bacteroidales;f__Bacteroidaceae;g__Prevotella;s__Prevotella_sp015060535	Prevotella_sp015060535	Prevotella
d__Bacteria;p__Bacteroidota;c__Bacteroidia;o__Bacteroidales;f__Bacteroidaceae;g__Prevotella;s__Prevotella_sp017400455	Prevotella_sp017400455	Prevotella
d__Bacteria;p__Bacteroidota;c__Bacteroidia;o__Bacteroidales;f__Bacteroidaceae;g__Prevotella;s__Prevotella_sp018127805	Prevotella_sp018127805	Prevotella
d__Bacteria;p__Bacteroidota;c__Bacteroidia;o__Bacteroidales;f__Bacteroidaceae;g__Prevotella;s__Prevotella_sp900100635	Prevotella_sp900100635	Prevotella
d__Bacteria;p__Bacteroidota;c__Bacteroidia;o__Bacteroidales;f__Bacteroidaceae;g__Prevotella;s__Prevotella_sp900107705	Prevotella_sp900107705	Prevotella
d__Bacteria;p__Bacteroidota;c__Bacteroidia;o__Bacteroidales;f__Bacteroidaceae;g__Prevotella;s__Prevotella_sp900109055	Prevotella_sp900109055	Prevotella
d__Bacteria;p__Bacteroidota;c__Bacteroidia;o__Bacteroidales;f__Bacteroidaceae;g__Prevotella;s__Prevotella_sp900110085	Prevotella_sp900110085	Prevotella
d__Bacteria;p__Bacteroidota;c__Bacteroidia;o__Bacteroidales;f__Bacteroidaceae;g__Prevotella;s__Prevotella_sp900110895	Prevotella_sp900110895	Prevotella
d__Bacteria;p__Bacteroidota;c__Bacteroidia;o__Bacteroidales;f__Bacteroidaceae;g__Prevotella;s__Prevotella_sp900115435	Prevotella_sp900115435	Prevotella
d__Bacteria;p__Bacteroidota;c__Bacteroidia;o__Bacteroidales;f__Bacteroidaceae;g__Prevotella;s__Prevotella_sp900199655	Prevotella_sp900199655	Prevotella
d__Bacteria;p__Bacteroidota;c__Bacteroidia;o__Bacteroidales;f__Bacteroidaceae;g__Prevotella;s__Prevotella_sp900290275	Prevotella_sp900290275	Prevotella
d__Bacteria;p__Bacteroidota;c__Bacteroidia;o__Bacteroidales;f__Bacteroidaceae;g__Prevotella;s__Prevotella_sp900313215	Prevotella_sp900313215	Prevotella
d__Bacteria;p__Bacteroidota;c__Bacteroidia;o__Bacteroidales;f__Bacteroidaceae;g__Prevotella;s__Prevotella_sp900313615	Prevotella_sp900313615	Prevotella
d__Bacteria;p__Bacteroidota;c__Bacteroidia;o__Bacteroidales;f__Bacteroidaceae;g__Prevotella;s__Prevotella_sp900313805	Prevotella_sp900313805	Prevotella
d__Bacteria;p__Bacteroidota;c__Bacteroidia;o__Bacteroidales;f__Bacteroidaceae;g__Prevotella;s__Prevotella_sp900314655	Prevotella_sp900314655	Prevotella
d__Bacteria;p__Bacteroidota;c__Bacteroidia;o__Bacteroidales;f__Bacteroidaceae;g__Prevotella;s__Prevotella_sp900314715	Prevotella_sp900314715	Prevotella
d__Bacteria;p__Bacteroidota;c__Bacteroidia;o__Bacteroidales;f__Bacteroidaceae;g__Prevotella;s__Prevotella_sp900314915	Prevotella_sp900314915	Prevotella
d__Bacteria;p__Bacteroidota;c__Bacteroidia;o__Bacteroidales;f__Bacteroidaceae;g__Prevotella;s__Prevotella_sp900314935	Prevotella_sp900314935	Prevotella
d__Bacteria;p__Bacteroidota;c__Bacteroidia;o__Bacteroidales;f__Bacteroidaceae;g__Prevotella;s__Prevotella_sp900314945	Prevotella_sp900314945	Prevotella
d__Bacteria;p__Bacteroidota;c__Bacteroidia;o__Bacteroidales;f__Bacteroidaceae;g__Prevotella;s__Prevotella_sp900314995	Prevotella_sp900314995	Prevotella
d__Bacteria;p__Bacteroidota;c__Bacteroidia;o__Bacteroidales;f__Bacteroidaceae;g__Prevotella;s__Prevotella_sp900315455	Prevotella_sp900315455	Prevotella
d__Bacteria;p__Bacteroidota;c__Bacteroidia;o__Bacteroidales;f__Bacteroidaceae;g__Prevotella;s__Prevotella_sp900315545	Prevotella_sp900315545	Prevotella
d__Bacteria;p__Bacteroidota;c__Bacteroidia;o__Bacteroidales;f__Bacteroidaceae;g__Prevotella;s__Prevotella_sp900315565	Prevotella_sp900315565	Prevotella
d__Bacteria;p__Bacteroidota;c__Bacteroidia;o__Bacteroidales;f__Bacteroidaceae;g__Prevotella;s__Prevotella_sp900315635	Prevotella_sp900315635	Prevotella
d__Bacteria;p__Bacteroidota;c__Bacteroidia;o__Bacteroidales;f__Bacteroidaceae;g__Prevotella;s__Prevotella_sp900315745	Prevotella_sp900315745	Prevotella
d__Bacteria;p__Bacteroidota;c__Bacteroidia;o__Bacteroidales;f__Bacteroidaceae;g__Prevotella;s__Prevotella_sp900315775	Prevotella_sp900315775	Prevotella
d__Bacteria;p__Bacteroidota;c__Bacteroidia;o__Bacteroidales;f__Bacteroidaceae;g__Prevotella;s__Prevotella_sp900315835	Prevotella_sp900315835	Prevotella
d__Bacteria;p__Bacteroidota;c__Bacteroidia;o__Bacteroidales;f__Bacteroidaceae;g__Prevotella;s__Prevotella_sp900315955	Prevotella_sp900315955	Prevotella
d__Bacteria;p__Bacteroidota;c__Bacteroidia;o__Bacteroidales;f__Bacteroidaceae;g__Prevotella;s__Prevotella_sp900316015	Prevotella_sp900316015	Prevotella
d__Bacteria;p__Bacteroidota;c__Bacteroidia;o__Bacteroidales;f__Bacteroidaceae;g__Prevotella;s__Prevotella_sp900316285	Prevotella_sp900316285	Prevotella
d__Bacteria;p__Bacteroidota;c__Bacteroidia;o__Bacteroidales;f__Bacteroidaceae;g__Prevotella;s__Prevotella_sp900316295	Prevotella_sp900316295	Prevotella
d__Bacteria;p__Bacteroidota;c__Bacteroidia;o__Bacteroidales;f__Bacteroidaceae;g__Prevotella;s__Prevotella_sp900316475	Prevotella_sp900316475	Prevotella
d__Bacteria;p__Bacteroidota;c__Bacteroidia;o__Bacteroidales;f__Bacteroidaceae;g__Prevotella;s__Prevotella_sp900316565	Prevotella_sp900316565	Prevotella
d__Bacteria;p__Bacteroidota;c__Bacteroidia;o__Bacteroidales;f__Bacteroidaceae;g__Prevotella;s__Prevotella_sp900316645	Prevotella_sp900316645	Prevotella
d__Bacteria;p__Bacteroidota;c__Bacteroidia;o__Bacteroidales;f__Bacteroidaceae;g__Prevotella;s__Prevotella_sp900316685	Prevotella_sp900316685	Prevotella
d__Bacteria;p__Bacteroidota;c__Bacteroidia;o__Bacteroidales;f__Bacteroidaceae;g__Prevotella;s__Prevotella_sp900316985	Prevotella_sp900316985	Prevotella
d__Bacteria;p__Bacteroidota;c__Bacteroidia;o__Bacteroidales;f__Bacteroidaceae;g__Prevotella;s__Prevotella_sp900317545	Prevotella_sp900317545	Prevotella
d__Bacteria;p__Bacteroidota;c__Bacteroidia;o__Bacteroidales;f__Bacteroidaceae;g__Prevotella;s__Prevotella_sp900318395	Prevotella_sp900318395	Prevotella
d__Bacteria;p__Bacteroidota;c__Bacteroidia;o__Bacteroidales;f__Bacteroidaceae;g__Prevotella;s__Prevotella_sp900318625	Prevotella_sp900318625	Prevotella
d__Bacteria;p__Bacteroidota;c__Bacteroidia;o__Bacteroidales;f__Bacteroidaceae;g__Prevotella;s__Prevotella_sp900318685	Prevotella_sp900318685	Prevotella
d__Bacteria;p__Bacteroidota;c__Bacteroidia;o__Bacteroidales;f__Bacteroidaceae;g__Prevotella;s__Prevotella_sp900318795	Prevotella_sp900318795	Prevotella
d__Bacteria;p__Bacteroidota;c__Bacteroidia;o__Bacteroidales;f__Bacteroidaceae;g__Prevotella;s__Prevotella_sp900318855	Prevotella_sp900318855	Prevotella
d__Bacteria;p__Bacteroidota;c__Bacteroidia;o__Bacteroidales;f__Bacteroidaceae;g__Prevotella;s__Prevotella_sp900318915	Prevotella_sp900318915	Prevotella
d__Bacteria;p__Bacteroidota;c__Bacteroidia;o__Bacteroidales;f__Bacteroidaceae;g__Prevotella;s__Prevotella_sp900319715	Prevotella_sp900319715	Prevotella
d__Bacteria;p__Bacteroidota;c__Bacteroidia;o__Bacteroidales;f__Bacteroidaceae;g__Prevotella;s__Prevotella_sp900319905	Prevotella_sp900319905	Prevotella
d__Bacteria;p__Bacteroidota;c__Bacteroidia;o__Bacteroidales;f__Bacteroidaceae;g__Prevotella;s__Prevotella_sp900320045	Prevotella_sp900320045	Prevotella
d__Bacteria;p__Bacteroidota;c__Bacteroidia;o__Bacteroidales;f__Bacteroidaceae;g__Prevotella;s__Prevotella_sp900320255	Prevotella_sp900320255	Prevotella
d__Bacteria;p__Bacteroidota;c__Bacteroidia;o__Bacteroidales;f__Bacteroidaceae;g__Prevotella;s__Prevotella_sp900320445	Prevotella_sp900320445	Prevotella
d__Bacteria;p__Bacteroidota;c__Bacteroidia;o__Bacteroidales;f__Bacteroidaceae;g__Prevotella;s__Prevotella_sp900320845	Prevotella_sp900320845	Prevotella
d__Bacteria;p__Bacteroidota;c__Bacteroidia;o__Bacteroidales;f__Bacteroidaceae;g__Prevotella;s__Prevotella_sp900320905	Prevotella_sp900320905	Prevotella
d__Bacteria;p__Bacteroidota;c__Bacteroidia;o__Bacteroidales;f__Bacteroidaceae;g__Prevotella;s__Prevotella_sp900321425	Prevotella_sp900321425	Prevotella
d__Bacteria;p__Bacteroidota;c__Bacteroidia;o__Bacteroidales;f__Bacteroidaceae;g__Prevotella;s__Prevotella_sp900322035	Prevotella_sp900322035	Prevotella
d__Bacteria;p__Bacteroidota;c__Bacteroidia;o__Bacteroidales;f__Bacteroidaceae;g__Prevotella;s__Prevotella_sp900322095	Prevotella_sp900322095	Prevotella
d__Bacteria;p__Bacteroidota;c__Bacteroidia;o__Bacteroidales;f__Bacteroidaceae;g__Prevotella;s__Prevotella_sp900540415	Prevotella_sp900540415	Prevotella
d__Bacteria;p__Bacteroidota;c__Bacteroidia;o__Bacteroidales;f__Bacteroidaceae;g__Prevotella;s__Prevotella_sp900543585	Prevotella_sp900543585	Prevotella
d__Bacteria;p__Bacteroidota;c__Bacteroidia;o__Bacteroidales;f__Bacteroidaceae;g__Prevotella;s__Prevotella_sp900543975	Prevotella_sp900543975	Prevotella
d__Bacteria;p__Bacteroidota;c__Bacteroidia;o__Bacteroidales;f__Bacteroidaceae;g__Prevotella;s__Prevotella_sp900544495	Prevotella_sp900544495	Prevotella
d__Bacteria;p__Bacteroidota;c__Bacteroidia;o__Bacteroidales;f__Bacteroidaceae;g__Prevotella;s__Prevotella_sp900544825	Prevotella_sp900544825	Prevotella
d__Bacteria;p__Bacteroidota;c__Bacteroidia;o__Bacteroidales;f__Bacteroidaceae;g__Prevotella;s__Prevotella_sp900546535	Prevotella_sp900546535	Prevotella
d__Bacteria;p__Bacteroidota;c__Bacteroidia;o__Bacteroidales;f__Bacteroidaceae;g__Prevotella;s__Prevotella_sp900546575	Prevotella_sp900546575	Prevotella
d__Bacteria;p__Bacteroidota;c__Bacteroidia;o__Bacteroidales;f__Bacteroidaceae;g__Prevotella;s__Prevotella_sp900547005	Prevotella_sp900547005	Prevotella
d__Bacteria;p__Bacteroidota;c__Bacteroidia;o__Bacteroidales;f__Bacteroidaceae;g__Prevotella;s__Prevotella_sp900548195	Prevotella_sp900548195	Prevotella
d__Bacteria;p__Bacteroidota;c__Bacteroidia;o__Bacteroidales;f__Bacteroidaceae;g__Prevotella;s__Prevotella_sp900548535	Prevotella_sp900548535	Prevotella
d__Bacteria;p__Bacteroidota;c__Bacteroidia;o__Bacteroidales;f__Bacteroidaceae;g__Prevotella;s__Prevotella_sp900548585	Prevotella_sp900548585	Prevotella
d__Bacteria;p__Bacteroidota;c__Bacteroidia;o__Bacteroidales;f__Bacteroidaceae;g__Prevotella;s__Prevotella_sp900548745	Prevotella_sp900548745	Prevotella
d__Bacteria;p__Bacteroidota;c__Bacteroidia;o__Bacteroidales;f__Bacteroidaceae;g__Prevotella;s__Prevotella_sp900549175	Prevotella_sp900549175	Prevotella
d__Bacteria;p__Bacteroidota;c__Bacteroidia;o__Bacteroidales;f__Bacteroidaceae;g__Prevotella;s__Prevotella_sp900552515	Prevotella_sp900552515	Prevotella
d__Bacteria;p__Bacteroidota;c__Bacteroidia;o__Bacteroidales;f__Bacteroidaceae;g__Prevotella;s__Prevotella_sp900552675	Prevotella_sp900552675	Prevotella
d__Bacteria;p__Bacteroidota;c__Bacteroidia;o__Bacteroidales;f__Bacteroidaceae;g__Prevotella;s__Prevotella_sp900553155	Prevotella_sp900553155	Prevotella
d__Bacteria;p__Bacteroidota;c__Bacteroidia;o__Bacteroidales;f__Bacteroidaceae;g__Prevotella;s__Prevotella_sp900553465	Prevotella_sp900553465	Prevotella
d__Bacteria;p__Bacteroidota;c__Bacteroidia;o__Bacteroidales;f__Bacteroidaceae;g__Prevotella;s__Prevotella_sp900553595	Prevotella_sp900553595	Prevotella
d__Bacteria;p__Bacteroidota;c__Bacteroidia;o__Bacteroidales;f__Bacteroidaceae;g__Prevotella;s__Prevotella_sp900553965	Prevotella_sp900553965	Prevotella
d__Bacteria;p__Bacteroidota;c__Bacteroidia;o__Bacteroidales;f__Bacteroidaceae;g__Prevotella;s__Prevotella_sp900554695	Prevotella_sp900554695	Prevotella
d__Bacteria;p__Bacteroidota;c__Bacteroidia;o__Bacteroidales;f__Bacteroidaceae;g__Prevotella;s__Prevotella_sp900556395	Prevotella_sp900556395	Prevotella
d__Bacteria;p__Bacteroidota;c__Bacteroidia;o__Bacteroidales;f__Bacteroidaceae;g__Prevotella;s__Prevotella_sp900556795	Prevotella_sp900556795	Prevotella
d__Bacteria;p__Bacteroidota;c__Bacteroidia;o__Bacteroidales;f__Bacteroidaceae;g__Prevotella;s__Prevotella_sp900557405	Prevotella_sp900557405	Prevotella
d__Bacteria;p__Bacteroidota;c__Bacteroidia;o__Bacteroidales;f__Bacteroidaceae;g__Prevotella;s__Prevotella_sp900767615	Prevotella_sp900767615	Prevotella
d__Bacteria;p__Bacteroidota;c__Bacteroidia;o__Bacteroidales;f__Bacteroidaceae;g__Prevotella;s__Prevotella_sp900770395	Prevotella_sp900770395	Prevotella
d__Bacteria;p__Bacteroidota;c__Bacteroidia;o__Bacteroidales;f__Bacteroidaceae;g__Prevotella;s__Prevotella_sp900771975	Prevotella_sp900771975	Prevotella
d__Bacteria;p__Bacteroidota;c__Bacteroidia;o__Bacteroidales;f__Bacteroidaceae;g__Prevotella;s__Prevotella_sp902760345	Prevotella_sp902760345	Prevotella
d__Bacteria;p__Bacteroidota;c__Bacteroidia;o__Bacteroidales;f__Bacteroidaceae;g__Prevotella;s__Prevotella_sp902761605	Prevotella_sp902761605	Prevotella
d__Bacteria;p__Bacteroidota;c__Bacteroidia;o__Bacteroidales;f__Bacteroidaceae;g__Prevotella;s__Prevotella_sp902762325	Prevotella_sp902762325	Prevotella
d__Bacteria;p__Bacteroidota;c__Bacteroidia;o__Bacteroidales;f__Bacteroidaceae;g__Prevotella;s__Prevotella_sp902762565	Prevotella_sp902762565	Prevotella
d__Bacteria;p__Bacteroidota;c__Bacteroidia;o__Bacteroidales;f__Bacteroidaceae;g__Prevotella;s__Prevotella_sp902763615	Prevotella_sp902763615	Prevotella
d__Bacteria;p__Bacteroidota;c__Bacteroidia;o__Bacteroidales;f__Bacteroidaceae;g__Prevotella;s__Prevotella_sp902767045	Prevotella_sp902767045	Prevotella
d__Bacteria;p__Bacteroidota;c__Bacteroidia;o__Bacteroidales;f__Bacteroidaceae;g__Prevotella;s__Prevotella_sp902767775	Prevotella_sp902767775	Prevotella
d__Bacteria;p__Bacteroidota;c__Bacteroidia;o__Bacteroidales;f__Bacteroidaceae;g__Prevotella;s__Prevotella_sp902768105	Prevotella_sp902768105	Prevotella
d__Bacteria;p__Bacteroidota;c__Bacteroidia;o__Bacteroidales;f__Bacteroidaceae;g__Prevotella;s__Prevotella_sp902769805	Prevotella_sp902769805	Prevotella
d__Bacteria;p__Bacteroidota;c__Bacteroidia;o__Bacteroidales;f__Bacteroidaceae;g__Prevotella;s__Prevotella_sp902771445	Prevotella_sp902771445	Prevotella
d__Bacteria;p__Bacteroidota;c__Bacteroidia;o__Bacteroidales;f__Bacteroidaceae;g__Prevotella;s__Prevotella_sp902774815	Prevotella_sp902774815	Prevotella
d__Bacteria;p__Bacteroidota;c__Bacteroidia;o__Bacteroidales;f__Bacteroidaceae;g__Prevotella;s__Prevotella_sp902775975	Prevotella_sp902775975	Prevotella
d__Bacteria;p__Bacteroidota;c__Bacteroidia;o__Bacteroidales;f__Bacteroidaceae;g__Prevotella;s__Prevotella_sp902778255	Prevotella_sp902778255	Prevotella
d__Bacteria;p__Bacteroidota;c__Bacteroidia;o__Bacteroidales;f__Bacteroidaceae;g__Prevotella;s__Prevotella_sp902778535	Prevotella_sp902778535	Prevotella
d__Bacteria;p__Bacteroidota;c__Bacteroidia;o__Bacteroidales;f__Bacteroidaceae;g__Prevotella;s__Prevotella_sp902781315	Prevotella_sp902781315	Prevotella
d__Bacteria;p__Bacteroidota;c__Bacteroidia;o__Bacteroidales;f__Bacteroidaceae;g__Prevotella;s__Prevotella_sp902782305	Prevotella_sp902782305	Prevotella
d__Bacteria;p__Bacteroidota;c__Bacteroidia;o__Bacteroidales;f__Bacteroidaceae;g__Prevotella;s__Prevotella_sp902783165	Prevotella_sp902783165	Prevotella
d__Bacteria;p__Bacteroidota;c__Bacteroidia;o__Bacteroidales;f__Bacteroidaceae;g__Prevotella;s__Prevotella_sp902783625	Prevotella_sp902783625	Prevotella
d__Bacteria;p__Bacteroidota;c__Bacteroidia;o__Bacteroidales;f__Bacteroidaceae;g__Prevotella;s__Prevotella_sp902784755	Prevotella_sp902784755	Prevotella
d__Bacteria;p__Bacteroidota;c__Bacteroidia;o__Bacteroidales;f__Bacteroidaceae;g__Prevotella;s__Prevotella_sp902797505	Prevotella_sp902797505	Prevotella
d__Bacteria;p__Bacteroidota;c__Bacteroidia;o__Bacteroidales;f__Bacteroidaceae;g__Prevotella;s__Prevotella_sp902798285	Prevotella_sp902798285	Prevotella
d__Bacteria;p__Bacteroidota;c__Bacteroidia;o__Bacteroidales;f__Bacteroidaceae;g__Prevotella;s__Prevotella_sp902798425	Prevotella_sp902798425	Prevotella
d__Bacteria;p__Bacteroidota;c__Bacteroidia;o__Bacteroidales;f__Bacteroidaceae;g__Prevotella;s__Prevotella_sp902799455	Prevotella_sp902799455	Prevotella
d__Bacteria;p__Bacteroidota;c__Bacteroidia;o__Bacteroidales;f__Bacteroidaceae;g__Prevotella;s__Prevotella_sp902800185	Prevotella_sp902800185	Prevotella
d__Bacteria;p__Bacteroidota;c__Bacteroidia;o__Bacteroidales;f__Bacteroidaceae;g__Prevotella;s__Prevotella_sp902801375	Prevotella_sp902801375	Prevotella
d__Bacteria;p__Bacteroidota;c__Bacteroidia;o__Bacteroidales;f__Bacteroidaceae;g__Prevotella;s__Prevotella_sp902803475	Prevotella_sp902803475	Prevotella
d__Bacteria;p__Bacteroidota;c__Bacteroidia;o__Bacteroidales;f__Bacteroidaceae;g__Prevotella;s__Prevotella_sp905236755	Prevotella_sp905236755	Prevotella
d__Bacteria;p__Bacteroidota;c__Bacteroidia;o__Bacteroidales;f__Bacteroidaceae;g__Prevotella;s__Prevotella_sp905372445	Prevotella_sp905372445	Prevotella
d__Bacteria;p__Bacteroidota;c__Bacteroidia;o__Bacteroidales;f__Bacteroidaceae;g__Prevotella;s__Prevotella_stercorea	Prevotella_stercorea	Prevotella
d__Bacteria;p__Bacteroidota;c__Bacteroidia;o__Bacteroidales;f__Bacteroidaceae;g__Prevotella;s__Prevotella_timonensis	Prevotella_timonensis	Prevotella
d__Bacteria;p__Bacteroidota;c__Bacteroidia;o__Bacteroidales;f__Bacteroidaceae;g__Prevotella;s__unknown	unknown	unknown
d__Bacteria;p__Bacteroidota;c__Bacteroidia;o__Bacteroidales;f__Bacteroidaceae;g__UBA2918;s__UBA2918_sp900313715	UBA2918_sp900313715	UBA2918
d__Bacteria;p__Bacteroidota;c__Bacteroidia;o__Bacteroidales;f__Bacteroidaceae;g__UBA3839;s__UBA3839_sp002350855	UBA3839_sp002350855	UBA3839
d__Bacteria;p__Bacteroidota;c__Bacteroidia;o__Bacteroidales;f__Bacteroidaceae;g__UBA3839;s__UBA3839_sp900321835	UBA3839_sp900321835	UBA3839
d__Bacteria;p__Bacteroidota;c__Bacteroidia;o__Bacteroidales;f__Bacteroidaceae;g__UBA4334;s__UBA4334_sp902802265	UBA4334_sp902802265	UBA4334
d__Bacteria;p__Bacteroidota;c__Bacteroidia;o__Bacteroidales;f__Bacteroidaceae;g__UBA4372;s__UBA4372_sp002297545	UBA4372_sp002297545	UBA4372
d__Bacteria;p__Bacteroidota;c__Bacteroidia;o__Bacteroidales;f__Bacteroidaceae;g__UBA4372;s__UBA4372_sp902781515	UBA4372_sp902781515	UBA4372
d__Bacteria;p__Bacteroidota;c__Bacteroidia;o__Bacteroidales;f__Bacteroidaceae;g__UBA4372;s__UBA4372_sp902801325	UBA4372_sp902801325	UBA4372
d__Bacteria;p__Bacteroidota;c__Bacteroidia;o__Bacteroidales;f__Barnesiellaceae;g__Barnesiella;s__Barnesiella_intestinihominis	Barnesiella_intestinihominis	Barnesiella
d__Bacteria;p__Bacteroidota;c__Bacteroidia;o__Bacteroidales;f__Barnesiellaceae;g__Barnesiella;s__Barnesiella_merdigallinarum	Barnesiella_merdigallinarum	Barnesiella
d__Bacteria;p__Bacteroidota;c__Bacteroidia;o__Bacteroidales;f__Barnesiellaceae;g__Barnesiella;s__Barnesiella_merdipullorum	Barnesiella_merdipullorum	Barnesiella
d__Bacteria;p__Bacteroidota;c__Bacteroidia;o__Bacteroidales;f__Barnesiellaceae;g__Barnesiella;s__Barnesiella_viscericola	Barnesiella_viscericola	Barnesiella
d__Bacteria;p__Bacteroidota;c__Bacteroidia;o__Bacteroidales;f__Barnesiellaceae;g__CABJAA01;s__CABJAA01_sp003150885	CABJAA01_sp003150885	CABJAA01
d__Bacteria;p__Bacteroidota;c__Bacteroidia;o__Bacteroidales;f__Barnesiellaceae;g__UMGS27;s__UMGS27_sp900538555	UMGS27_sp900538555	UMGS27
d__Bacteria;p__Bacteroidota;c__Bacteroidia;o__Bacteroidales;f__Coprobacteraceae;g__Coprobacter;s__Coprobacter_fastidiosus	Coprobacter_fastidiosus	Coprobacter
d__Bacteria;p__Bacteroidota;c__Bacteroidia;o__Bacteroidales;f__Coprobacteraceae;g__Coprobacter;s__Coprobacter_secundus	Coprobacter_secundus	Coprobacter
d__Bacteria;p__Bacteroidota;c__Bacteroidia;o__Bacteroidales;f__Dysgonomonadaceae;g__Dysgonomonas;s__Dysgonomonas_macrotermitis	Dysgonomonas_macrotermitis	Dysgonomonas
d__Bacteria;p__Bacteroidota;c__Bacteroidia;o__Bacteroidales;f__Dysgonomonadaceae;g__Dysgonomonas;s__Dysgonomonas_massiliensis	Dysgonomonas_massiliensis	Dysgonomonas
d__Bacteria;p__Bacteroidota;c__Bacteroidia;o__Bacteroidales;f__Dysgonomonadaceae;g__Dysgonomonas;s__Dysgonomonas_sp010501055	Dysgonomonas_sp010501055	Dysgonomonas
d__Bacteria;p__Bacteroidota;c__Bacteroidia;o__Bacteroidales;f__Dysgonomonadaceae;g__Dysgonomonas;s__Dysgonomonas_sp010501075	Dysgonomonas_sp010501075	Dysgonomonas
d__Bacteria;p__Bacteroidota;c__Bacteroidia;o__Bacteroidales;f__Dysgonomonadaceae;g__Dysgonomonas;s__Dysgonomonas_sp010501105	Dysgonomonas_sp010501105	Dysgonomonas
d__Bacteria;p__Bacteroidota;c__Bacteroidia;o__Bacteroidales;f__Marinifilaceae;g__Butyricimonas;s__Butyricimonas_faecalis	Butyricimonas_faecalis	Butyricimonas
d__Bacteria;p__Bacteroidota;c__Bacteroidia;o__Bacteroidales;f__Marinifilaceae;g__Butyricimonas;s__Butyricimonas_faecihominis	Butyricimonas_faecihominis	Butyricimonas
d__Bacteria;p__Bacteroidota;c__Bacteroidia;o__Bacteroidales;f__Marinifilaceae;g__Butyricimonas;s__Butyricimonas_sp003479425	Butyricimonas_sp003479425	Butyricimonas
d__Bacteria;p__Bacteroidota;c__Bacteroidia;o__Bacteroidales;f__Marinifilaceae;g__Butyricimonas;s__Butyricimonas_virosa	Butyricimonas_virosa	Butyricimonas
d__Bacteria;p__Bacteroidota;c__Bacteroidia;o__Bacteroidales;f__Marinifilaceae;g__Gabonibacter;s__Gabonibacter_massiliensis	Gabonibacter_massiliensis	Gabonibacter
d__Bacteria;p__Bacteroidota;c__Bacteroidia;o__Bacteroidales;f__Marinifilaceae;g__Odoribacter;s__Odoribacter_massiliensis	Odoribacter_massiliensis	Odoribacter
d__Bacteria;p__Bacteroidota;c__Bacteroidia;o__Bacteroidales;f__Marinifilaceae;g__Odoribacter;s__Odoribacter_sp009935865	Odoribacter_sp009935865	Odoribacter
d__Bacteria;p__Bacteroidota;c__Bacteroidia;o__Bacteroidales;f__Marinifilaceae;g__Odoribacter;s__Odoribacter_sp900541415	Odoribacter_sp900541415	Odoribacter
d__Bacteria;p__Bacteroidota;c__Bacteroidia;o__Bacteroidales;f__Marinifilaceae;g__Odoribacter;s__Odoribacter_sp900544025	Odoribacter_sp900544025	Odoribacter
d__Bacteria;p__Bacteroidota;c__Bacteroidia;o__Bacteroidales;f__Marinifilaceae;g__Odoribacter;s__Odoribacter_sp900548135	Odoribacter_sp900548135	Odoribacter
d__Bacteria;p__Bacteroidota;c__Bacteroidia;o__Bacteroidales;f__Marinifilaceae;g__Odoribacter;s__Odoribacter_sp905193145	Odoribacter_sp905193145	Odoribacter
d__Bacteria;p__Bacteroidota;c__Bacteroidia;o__Bacteroidales;f__Marinifilaceae;g__Odoribacter;s__Odoribacter_sp910578105	Odoribacter_sp910578105	Odoribacter
d__Bacteria;p__Bacteroidota;c__Bacteroidia;o__Bacteroidales;f__Marinifilaceae;g__Odoribacter;s__Odoribacter_sp910578985	Odoribacter_sp910578985	Odoribacter
d__Bacteria;p__Bacteroidota;c__Bacteroidia;o__Bacteroidales;f__Marinifilaceae;g__Odoribacter;s__Odoribacter_splanchnicus	Odoribacter_splanchnicus	Odoribacter
d__Bacteria;p__Bacteroidota;c__Bacteroidia;o__Bacteroidales;f__Marinifilaceae;g__Odoribacter;s__unknown	unknown	unknown
d__Bacteria;p__Bacteroidota;c__Bacteroidia;o__Bacteroidales;f__Muribaculaceae;g__Limisoma;s__Limisoma_gallistercoris	Limisoma_gallistercoris	Limisoma
d__Bacteria;p__Bacteroidota;c__Bacteroidia;o__Bacteroidales;f__Muribaculaceae;g__Limisoma;s__Limisoma_sp000437795	Limisoma_sp000437795	Limisoma
d__Bacteria;p__Bacteroidota;c__Bacteroidia;o__Bacteroidales;f__Paludibacteraceae;g__QVMH01;s__QVMH01_sp010501035	QVMH01_sp010501035	QVMH01
d__Bacteria;p__Bacteroidota;c__Bacteroidia;o__Bacteroidales;f__Porphyromonadaceae;g__Porphyromonas;s__Porphyromonas_asaccharolytica	Porphyromonas_asaccharolytica	Porphyromonas
d__Bacteria;p__Bacteroidota;c__Bacteroidia;o__Bacteroidales;f__Porphyromonadaceae;g__Porphyromonas;s__Porphyromonas_sp900538385	Porphyromonas_sp900538385	Porphyromonas
d__Bacteria;p__Bacteroidota;c__Bacteroidia;o__Bacteroidales;f__Porphyromonadaceae;g__Porphyromonas;s__Porphyromonas_sp900548415	Porphyromonas_sp900548415	Porphyromonas
d__Bacteria;p__Bacteroidota;c__Bacteroidia;o__Bacteroidales;f__Porphyromonadaceae;g__Porphyromonas;s__Porphyromonas_uenonis	Porphyromonas_uenonis	Porphyromonas
d__Bacteria;p__Bacteroidota;c__Bacteroidia;o__Bacteroidales;f__Porphyromonadaceae;g__Porphyromonas;s__Porphyromonas_uenonis_A	Porphyromonas_uenonis_A	Porphyromonas
d__Bacteria;p__Bacteroidota;c__Bacteroidia;o__Bacteroidales;f__Rikenellaceae;g__Alistipes;s__Alistipes_avistercoris	Alistipes_avistercoris	Alistipes
d__Bacteria;p__Bacteroidota;c__Bacteroidia;o__Bacteroidales;f__Rikenellaceae;g__Alistipes;s__Alistipes_communis	Alistipes_communis	Alistipes
d__Bacteria;p__Bacteroidota;c__Bacteroidia;o__Bacteroidales;f__Rikenellaceae;g__Alistipes;s__Alistipes_cottocaccae	Alistipes_cottocaccae	Alistipes
d__Bacteria;p__Bacteroidota;c__Bacteroidia;o__Bacteroidales;f__Rikenellaceae;g__Alistipes;s__Alistipes_dispar	Alistipes_dispar	Alistipes
d__Bacteria;p__Bacteroidota;c__Bacteroidia;o__Bacteroidales;f__Rikenellaceae;g__Alistipes;s__Alistipes_excrementavium	Alistipes_excrementavium	Alistipes
d__Bacteria;p__Bacteroidota;c__Bacteroidia;o__Bacteroidales;f__Rikenellaceae;g__Alistipes;s__Alistipes_excrementigallinarum	Alistipes_excrementigallinarum	Alistipes
d__Bacteria;p__Bacteroidota;c__Bacteroidia;o__Bacteroidales;f__Rikenellaceae;g__Alistipes;s__Alistipes_faecigallinarum	Alistipes_faecigallinarum	Alistipes
d__Bacteria;p__Bacteroidota;c__Bacteroidia;o__Bacteroidales;f__Rikenellaceae;g__Alistipes;s__Alistipes_finegoldii	Alistipes_finegoldii	Alistipes
d__Bacteria;p__Bacteroidota;c__Bacteroidia;o__Bacteroidales;f__Rikenellaceae;g__Alistipes;s__Alistipes_megaguti	Alistipes_megaguti	Alistipes
d__Bacteria;p__Bacteroidota;c__Bacteroidia;o__Bacteroidales;f__Rikenellaceae;g__Alistipes;s__Alistipes_merdavium	Alistipes_merdavium	Alistipes
d__Bacteria;p__Bacteroidota;c__Bacteroidia;o__Bacteroidales;f__Rikenellaceae;g__Alistipes;s__Alistipes_onderdonkii	Alistipes_onderdonkii	Alistipes
d__Bacteria;p__Bacteroidota;c__Bacteroidia;o__Bacteroidales;f__Rikenellaceae;g__Alistipes;s__Alistipes_provencensis	Alistipes_provencensis	Alistipes
d__Bacteria;p__Bacteroidota;c__Bacteroidia;o__Bacteroidales;f__Rikenellaceae;g__Alistipes;s__Alistipes_putredinis	Alistipes_putredinis	Alistipes
d__Bacteria;p__Bacteroidota;c__Bacteroidia;o__Bacteroidales;f__Rikenellaceae;g__Alistipes;s__Alistipes_senegalensis	Alistipes_senegalensis	Alistipes
d__Bacteria;p__Bacteroidota;c__Bacteroidia;o__Bacteroidales;f__Rikenellaceae;g__Alistipes;s__Alistipes_shahii	Alistipes_shahii	Alistipes
d__Bacteria;p__Bacteroidota;c__Bacteroidia;o__Bacteroidales;f__Rikenellaceae;g__Alistipes;s__Alistipes_sp001941065	Alistipes_sp001941065	Alistipes
d__Bacteria;p__Bacteroidota;c__Bacteroidia;o__Bacteroidales;f__Rikenellaceae;g__Alistipes;s__Alistipes_sp002358415	Alistipes_sp002358415	Alistipes
d__Bacteria;p__Bacteroidota;c__Bacteroidia;o__Bacteroidales;f__Rikenellaceae;g__Alistipes;s__Alistipes_sp002362235	Alistipes_sp002362235	Alistipes
d__Bacteria;p__Bacteroidota;c__Bacteroidia;o__Bacteroidales;f__Rikenellaceae;g__Alistipes;s__Alistipes_sp002428825	Alistipes_sp002428825	Alistipes
d__Bacteria;p__Bacteroidota;c__Bacteroidia;o__Bacteroidales;f__Rikenellaceae;g__Alistipes;s__Alistipes_sp003979135	Alistipes_sp003979135	Alistipes
d__Bacteria;p__Bacteroidota;c__Bacteroidia;o__Bacteroidales;f__Rikenellaceae;g__Alistipes;s__Alistipes_sp009774895	Alistipes_sp009774895	Alistipes
d__Bacteria;p__Bacteroidota;c__Bacteroidia;o__Bacteroidales;f__Rikenellaceae;g__Alistipes;s__Alistipes_sp015059905	Alistipes_sp015059905	Alistipes
d__Bacteria;p__Bacteroidota;c__Bacteroidia;o__Bacteroidales;f__Rikenellaceae;g__Alistipes;s__Alistipes_sp015059925	Alistipes_sp015059925	Alistipes
d__Bacteria;p__Bacteroidota;c__Bacteroidia;o__Bacteroidales;f__Rikenellaceae;g__Alistipes;s__Alistipes_sp900549305	Alistipes_sp900549305	Alistipes
d__Bacteria;p__Bacteroidota;c__Bacteroidia;o__Bacteroidales;f__Rikenellaceae;g__Alistipes;s__Alistipes_sp900550925	Alistipes_sp900550925	Alistipes
d__Bacteria;p__Bacteroidota;c__Bacteroidia;o__Bacteroidales;f__Rikenellaceae;g__Alistipes;s__Alistipes_sp902363575	Alistipes_sp902363575	Alistipes
d__Bacteria;p__Bacteroidota;c__Bacteroidia;o__Bacteroidales;f__Rikenellaceae;g__Alistipes;s__Alistipes_sp902388705	Alistipes_sp902388705	Alistipes
d__Bacteria;p__Bacteroidota;c__Bacteroidia;o__Bacteroidales;f__Rikenellaceae;g__Alistipes;s__Alistipes_sp910575495	Alistipes_sp910575495	Alistipes
d__Bacteria;p__Bacteroidota;c__Bacteroidia;o__Bacteroidales;f__Rikenellaceae;g__Alistipes;s__Alistipes_sp910576555	Alistipes_sp910576555	Alistipes
d__Bacteria;p__Bacteroidota;c__Bacteroidia;o__Bacteroidales;f__Rikenellaceae;g__Alistipes;s__Alistipes_sp910577475	Alistipes_sp910577475	Alistipes
d__Bacteria;p__Bacteroidota;c__Bacteroidia;o__Bacteroidales;f__Rikenellaceae;g__Alistipes;s__Alistipes_sp910580175	Alistipes_sp910580175	Alistipes
d__Bacteria;p__Bacteroidota;c__Bacteroidia;o__Bacteroidales;f__Rikenellaceae;g__Alistipes;s__Alistipes_sp910584485	Alistipes_sp910584485	Alistipes
d__Bacteria;p__Bacteroidota;c__Bacteroidia;o__Bacteroidales;f__Rikenellaceae;g__Alistipes;s__Alistipes_sp910586375	Alistipes_sp910586375	Alistipes
d__Bacteria;p__Bacteroidota;c__Bacteroidia;o__Bacteroidales;f__Rikenellaceae;g__Alistipes;s__Alistipes_stercorigallinarum	Alistipes_stercorigallinarum	Alistipes
d__Bacteria;p__Bacteroidota;c__Bacteroidia;o__Bacteroidales;f__Rikenellaceae;g__Alistipes;s__Alistipes_timonensis	Alistipes_timonensis	Alistipes
d__Bacteria;p__Bacteroidota;c__Bacteroidia;o__Bacteroidales;f__Rikenellaceae;g__Alistipes;s__unknown	unknown	unknown
d__Bacteria;p__Bacteroidota;c__Bacteroidia;o__Bacteroidales;f__Rikenellaceae;g__Alistipes_A;s__Alistipes_A_indistinctus	Alistipes_A_indistinctus	Alistipes
d__Bacteria;p__Bacteroidota;c__Bacteroidia;o__Bacteroidales;f__Rikenellaceae;g__DSM-108975;s__DSM-108975_sp014982715	DSM-108975_sp014982715	DSM-108975
d__Bacteria;p__Bacteroidota;c__Bacteroidia;o__Bacteroidales;f__Rikenellaceae;g__Rikenella;s__Rikenella_massiliensis	Rikenella_massiliensis	Rikenella
d__Bacteria;p__Bacteroidota;c__Bacteroidia;o__Bacteroidales;f__Rikenellaceae;g__Rikenella;s__Rikenella_microfusus	Rikenella_microfusus	Rikenella
d__Bacteria;p__Bacteroidota;c__Bacteroidia;o__Bacteroidales;f__Tannerellaceae;g__;s__unknown	unknown	unknown
d__Bacteria;p__Bacteroidota;c__Bacteroidia;o__Bacteroidales;f__Tannerellaceae;g__Barb7;s__Barb7_sp001657575	Barb7_sp001657575	Barb7
d__Bacteria;p__Bacteroidota;c__Bacteroidia;o__Bacteroidales;f__Tannerellaceae;g__Barb7;s__Barb7_sp010500925	Barb7_sp010500925	Barb7
d__Bacteria;p__Bacteroidota;c__Bacteroidia;o__Bacteroidales;f__Tannerellaceae;g__Macellibacteroides;s__Macellibacteroides_fermentans	Macellibacteroides_fermentans	Macellibacteroides
d__Bacteria;p__Bacteroidota;c__Bacteroidia;o__Bacteroidales;f__Tannerellaceae;g__Marseille-P3160;s__Marseille-P3160_sp900162725	Marseille-P3160_sp900162725	Marseille-P3160
d__Bacteria;p__Bacteroidota;c__Bacteroidia;o__Bacteroidales;f__Tannerellaceae;g__Massilibacteroides;s__Massilibacteroides_vaginae	Massilibacteroides_vaginae	Massilibacteroides
d__Bacteria;p__Bacteroidota;c__Bacteroidia;o__Bacteroidales;f__Tannerellaceae;g__Parabacteroides;s__Parabacteroides_acidifaciens	Parabacteroides_acidifaciens	Parabacteroides
d__Bacteria;p__Bacteroidota;c__Bacteroidia;o__Bacteroidales;f__Tannerellaceae;g__Parabacteroides;s__Parabacteroides_bouchesdurhonensis	Parabacteroides_bouchesdurhonensis	Parabacteroides
d__Bacteria;p__Bacteroidota;c__Bacteroidia;o__Bacteroidales;f__Tannerellaceae;g__Parabacteroides;s__Parabacteroides_chinchillae	Parabacteroides_chinchillae	Parabacteroides
d__Bacteria;p__Bacteroidota;c__Bacteroidia;o__Bacteroidales;f__Tannerellaceae;g__Parabacteroides;s__Parabacteroides_distasonis	Parabacteroides_distasonis	Parabacteroides
d__Bacteria;p__Bacteroidota;c__Bacteroidia;o__Bacteroidales;f__Tannerellaceae;g__Parabacteroides;s__Parabacteroides_distasonis_A	Parabacteroides_distasonis_A	Parabacteroides
d__Bacteria;p__Bacteroidota;c__Bacteroidia;o__Bacteroidales;f__Tannerellaceae;g__Parabacteroides;s__Parabacteroides_faecavium	Parabacteroides_faecavium	Parabacteroides
d__Bacteria;p__Bacteroidota;c__Bacteroidia;o__Bacteroidales;f__Tannerellaceae;g__Parabacteroides;s__Parabacteroides_faecis	Parabacteroides_faecis	Parabacteroides
d__Bacteria;p__Bacteroidota;c__Bacteroidia;o__Bacteroidales;f__Tannerellaceae;g__Parabacteroides;s__Parabacteroides_goldsteinii	Parabacteroides_goldsteinii	Parabacteroides
d__Bacteria;p__Bacteroidota;c__Bacteroidia;o__Bacteroidales;f__Tannerellaceae;g__Parabacteroides;s__Parabacteroides_gordonii	Parabacteroides_gordonii	Parabacteroides
d__Bacteria;p__Bacteroidota;c__Bacteroidia;o__Bacteroidales;f__Tannerellaceae;g__Parabacteroides;s__Parabacteroides_intestinipullorum	Parabacteroides_intestinipullorum	Parabacteroides
d__Bacteria;p__Bacteroidota;c__Bacteroidia;o__Bacteroidales;f__Tannerellaceae;g__Parabacteroides;s__Parabacteroides_johnsonii	Parabacteroides_johnsonii	Parabacteroides
d__Bacteria;p__Bacteroidota;c__Bacteroidia;o__Bacteroidales;f__Tannerellaceae;g__Parabacteroides;s__Parabacteroides_massiliensis	Parabacteroides_massiliensis	Parabacteroides
d__Bacteria;p__Bacteroidota;c__Bacteroidia;o__Bacteroidales;f__Tannerellaceae;g__Parabacteroides;s__Parabacteroides_merdae	Parabacteroides_merdae	Parabacteroides
d__Bacteria;p__Bacteroidota;c__Bacteroidia;o__Bacteroidales;f__Tannerellaceae;g__Parabacteroides;s__Parabacteroides_sp002159645	Parabacteroides_sp002159645	Parabacteroides
d__Bacteria;p__Bacteroidota;c__Bacteroidia;o__Bacteroidales;f__Tannerellaceae;g__Parabacteroides;s__Parabacteroides_sp003473295	Parabacteroides_sp003473295	Parabacteroides
d__Bacteria;p__Bacteroidota;c__Bacteroidia;o__Bacteroidales;f__Tannerellaceae;g__Parabacteroides;s__Parabacteroides_sp003480915	Parabacteroides_sp003480915	Parabacteroides
d__Bacteria;p__Bacteroidota;c__Bacteroidia;o__Bacteroidales;f__Tannerellaceae;g__Parabacteroides;s__Parabacteroides_sp011038785	Parabacteroides_sp011038785	Parabacteroides
d__Bacteria;p__Bacteroidota;c__Bacteroidia;o__Bacteroidales;f__Tannerellaceae;g__Parabacteroides;s__Parabacteroides_sp014287585	Parabacteroides_sp014287585	Parabacteroides
d__Bacteria;p__Bacteroidota;c__Bacteroidia;o__Bacteroidales;f__Tannerellaceae;g__Parabacteroides;s__Parabacteroides_sp900540715	Parabacteroides_sp900540715	Parabacteroides
d__Bacteria;p__Bacteroidota;c__Bacteroidia;o__Bacteroidales;f__Tannerellaceae;g__Parabacteroides;s__Parabacteroides_sp900548175	Parabacteroides_sp900548175	Parabacteroides
d__Bacteria;p__Bacteroidota;c__Bacteroidia;o__Bacteroidales;f__Tannerellaceae;g__Parabacteroides;s__Parabacteroides_sp900549585	Parabacteroides_sp900549585	Parabacteroides
d__Bacteria;p__Bacteroidota;c__Bacteroidia;o__Bacteroidales;f__Tannerellaceae;g__Parabacteroides;s__Parabacteroides_sp900760525	Parabacteroides_sp900760525	Parabacteroides
d__Bacteria;p__Bacteroidota;c__Bacteroidia;o__Bacteroidales;f__Tannerellaceae;g__Parabacteroides;s__Parabacteroides_sp910577325	Parabacteroides_sp910577325	Parabacteroides
d__Bacteria;p__Bacteroidota;c__Bacteroidia;o__Bacteroidales;f__Tannerellaceae;g__Parabacteroides;s__Parabacteroides_timonensis	Parabacteroides_timonensis	Parabacteroides
d__Bacteria;p__Bacteroidota;c__Bacteroidia;o__Bacteroidales;f__Tannerellaceae;g__Parabacteroides;s__unknown	unknown	unknown
d__Bacteria;p__Bacteroidota;c__Bacteroidia;o__Bacteroidales;f__Tannerellaceae;g__Parabacteroides_B;s__Parabacteroides_B_pacaensis	Parabacteroides_B_pacaensis	Parabacteroides
d__Bacteria;p__Bacteroidota;c__Bacteroidia;o__Bacteroidales;f__Tannerellaceae;g__Tannerella;s__unknown	unknown	unknown
d__Bacteria;p__Bacteroidota;c__Bacteroidia;o__Bacteroidales;f__UBA932;g__Cryptobacteroides;s__Cryptobacteroides_sp000431015	Cryptobacteroides_sp000431015	Cryptobacteroides
d__Bacteria;p__Bacteroidota;c__Bacteroidia;o__Bacteroidales;f__UBA932;g__Cryptobacteroides;s__Cryptobacteroides_sp000432515	Cryptobacteroides_sp000432515	Cryptobacteroides
d__Bacteria;p__Bacteroidota;c__Bacteroidia;o__Bacteroidales;f__UBA932;g__Cryptobacteroides;s__Cryptobacteroides_sp000433355	Cryptobacteroides_sp000433355	Cryptobacteroides
d__Bacteria;p__Bacteroidota;c__Bacteroidia;o__Bacteroidales;f__UBA932;g__Cryptobacteroides;s__Cryptobacteroides_sp000434935	Cryptobacteroides_sp000434935	Cryptobacteroides
d__Bacteria;p__Bacteroidota;c__Bacteroidia;o__Bacteroidales;f__UBA932;g__Cryptobacteroides;s__Cryptobacteroides_sp000435075	Cryptobacteroides_sp000435075	Cryptobacteroides
d__Bacteria;p__Bacteroidota;c__Bacteroidia;o__Bacteroidales;f__UBA932;g__Cryptobacteroides;s__Cryptobacteroides_sp002297815	Cryptobacteroides_sp002297815	Cryptobacteroides
d__Bacteria;p__Bacteroidota;c__Bacteroidia;o__Bacteroidales;f__UBA932;g__Cryptobacteroides;s__Cryptobacteroides_sp002314195	Cryptobacteroides_sp002314195	Cryptobacteroides
d__Bacteria;p__Bacteroidota;c__Bacteroidia;o__Bacteroidales;f__UBA932;g__Cryptobacteroides;s__Cryptobacteroides_sp002321335	Cryptobacteroides_sp002321335	Cryptobacteroides
d__Bacteria;p__Bacteroidota;c__Bacteroidia;o__Bacteroidales;f__UBA932;g__Cryptobacteroides;s__Cryptobacteroides_sp002437305	Cryptobacteroides_sp002437305	Cryptobacteroides
d__Bacteria;p__Bacteroidota;c__Bacteroidia;o__Bacteroidales;f__UBA932;g__Cryptobacteroides;s__Cryptobacteroides_sp002438845	Cryptobacteroides_sp002438845	Cryptobacteroides
d__Bacteria;p__Bacteroidota;c__Bacteroidia;o__Bacteroidales;f__UBA932;g__Cryptobacteroides;s__Cryptobacteroides_sp002439585	Cryptobacteroides_sp002439585	Cryptobacteroides
d__Bacteria;p__Bacteroidota;c__Bacteroidia;o__Bacteroidales;f__UBA932;g__Cryptobacteroides;s__Cryptobacteroides_sp004552965	Cryptobacteroides_sp004552965	Cryptobacteroides
d__Bacteria;p__Bacteroidota;c__Bacteroidia;o__Bacteroidales;f__UBA932;g__Cryptobacteroides;s__Cryptobacteroides_sp900319685	Cryptobacteroides_sp900319685	Cryptobacteroides
d__Bacteria;p__Bacteroidota;c__Bacteroidia;o__Bacteroidales;f__UBA932;g__Cryptobacteroides;s__Cryptobacteroides_sp900320185	Cryptobacteroides_sp900320185	Cryptobacteroides
d__Bacteria;p__Bacteroidota;c__Bacteroidia;o__Bacteroidales;f__UBA932;g__Cryptobacteroides;s__Cryptobacteroides_sp900544195	Cryptobacteroides_sp900544195	Cryptobacteroides
d__Bacteria;p__Bacteroidota;c__Bacteroidia;o__Bacteroidales;f__UBA932;g__Cryptobacteroides;s__Cryptobacteroides_sp900546925	Cryptobacteroides_sp900546925	Cryptobacteroides
d__Bacteria;p__Bacteroidota;c__Bacteroidia;o__Bacteroidales;f__UBA932;g__Cryptobacteroides;s__Cryptobacteroides_sp902801885	Cryptobacteroides_sp902801885	Cryptobacteroides
d__Bacteria;p__Bacteroidota;c__Bacteroidia;o__Bacteroidales;f__UBA932;g__Cryptobacteroides;s__unknown	unknown	unknown
d__Bacteria;p__Campylobacterota;c__Campylobacteria;o__Campylobacterales;f__Campylobacteraceae;g__Campylobacter;s__Campylobacter_infans	Campylobacter_infans	Campylobacter
d__Bacteria;p__Campylobacterota;c__Campylobacteria;o__Campylobacterales;f__Campylobacteraceae;g__Campylobacter_A;s__Campylobacter_A_concisus_T	Campylobacter_A_concisus_T	Campylobacter
d__Bacteria;p__Cyanobacteria;c__Vampirovibrionia;o__Gastranaerophilales;f__Gastranaerophilaceae;g__Stercorousia;s__Stercorousia_sp000437435	Stercorousia_sp000437435	Stercorousia
d__Bacteria;p__Cyanobacteria;c__Vampirovibrionia;o__Gastranaerophilales;f__Gastranaerophilaceae;g__Stercorousia;s__Stercorousia_sp001765415	Stercorousia_sp001765415	Stercorousia
d__Bacteria;p__Cyanobacteria;c__Vampirovibrionia;o__Gastranaerophilales;f__Gastranaerophilaceae;g__Stercorousia;s__Stercorousia_sp900556295	Stercorousia_sp900556295	Stercorousia
d__Bacteria;p__Cyanobacteria;c__Vampirovibrionia;o__Gastranaerophilales;f__Gastranaerophilaceae;g__Stercorousia;s__Stercorousia_sp900761225	Stercorousia_sp900761225	Stercorousia
d__Bacteria;p__Cyanobacteria;c__Vampirovibrionia;o__Gastranaerophilales;f__Gastranaerophilaceae;g__Stercorousia;s__Stercorousia_sp900767135	Stercorousia_sp900767135	Stercorousia
d__Bacteria;p__Cyanobacteria;c__Vampirovibrionia;o__Gastranaerophilales;f__Gastranaerophilaceae;g__Stercorousia;s__Stercorousia_sp900769355	Stercorousia_sp900769355	Stercorousia
d__Bacteria;p__Cyanobacteria;c__Vampirovibrionia;o__Gastranaerophilales;f__Gastranaerophilaceae;g__Stercorousia;s__Stercorousia_sp910588555	Stercorousia_sp910588555	Stercorousia
d__Bacteria;p__Cyanobacteria;c__Vampirovibrionia;o__Gastranaerophilales;f__Gastranaerophilaceae;g__Stercorousia;s__unknown	unknown	unknown
d__Bacteria;p__Cyanobacteria;c__Vampirovibrionia;o__Gastranaerophilales;f__Gastranaerophilaceae;g__UBA1221;s__UBA1221_sp002350725	UBA1221_sp002350725	UBA1221
d__Bacteria;p__Cyanobacteria;c__Vampirovibrionia;o__Gastranaerophilales;f__Gastranaerophilaceae;g__UBA1221;s__UBA1221_sp900770525	UBA1221_sp900770525	UBA1221
d__Bacteria;p__Desulfobacterota_I;c__Desulfovibrionia;o__Desulfovibrionales;f__Desulfovibrionaceae;g__Bilophila;s__Bilophila_faecipullorum	Bilophila_faecipullorum	Bilophila
d__Bacteria;p__Desulfobacterota_I;c__Desulfovibrionia;o__Desulfovibrionales;f__Desulfovibrionaceae;g__Bilophila;s__Bilophila_sp900550745	Bilophila_sp900550745	Bilophila
d__Bacteria;p__Desulfobacterota_I;c__Desulfovibrionia;o__Desulfovibrionales;f__Desulfovibrionaceae;g__Bilophila;s__Bilophila_sp902373525	Bilophila_sp902373525	Bilophila
d__Bacteria;p__Desulfobacterota_I;c__Desulfovibrionia;o__Desulfovibrionales;f__Desulfovibrionaceae;g__Bilophila;s__Bilophila_wadsworthia	Bilophila_wadsworthia	Bilophila
d__Bacteria;p__Desulfobacterota_I;c__Desulfovibrionia;o__Desulfovibrionales;f__Desulfovibrionaceae;g__Bilophila;s__unknown	unknown	unknown
d__Bacteria;p__Desulfobacterota_I;c__Desulfovibrionia;o__Desulfovibrionales;f__Desulfovibrionaceae;g__Desulfovibrio;s__Desulfovibrio_desulfuricans	Desulfovibrio_desulfuricans	Desulfovibrio
d__Bacteria;p__Desulfobacterota_I;c__Desulfovibrionia;o__Desulfovibrionales;f__Desulfovibrionaceae;g__Desulfovibrio;s__Desulfovibrio_gallistercoris	Desulfovibrio_gallistercoris	Desulfovibrio
d__Bacteria;p__Desulfobacterota_I;c__Desulfovibrionia;o__Desulfovibrionales;f__Desulfovibrionaceae;g__Desulfovibrio;s__Desulfovibrio_sp900319575	Desulfovibrio_sp900319575	Desulfovibrio
d__Bacteria;p__Desulfobacterota_I;c__Desulfovibrionia;o__Desulfovibrionales;f__Desulfovibrionaceae;g__Desulfovibrio;s__Desulfovibrio_sp900556755	Desulfovibrio_sp900556755	Desulfovibrio
d__Bacteria;p__Desulfobacterota_I;c__Desulfovibrionia;o__Desulfovibrionales;f__Desulfovibrionaceae;g__Desulfovibrio;s__unknown	unknown	unknown
d__Bacteria;p__Desulfobacterota_I;c__Desulfovibrionia;o__Desulfovibrionales;f__Desulfovibrionaceae;g__Mailhella;s__Mailhella_excrementigallinarum	Mailhella_excrementigallinarum	Mailhella
d__Bacteria;p__Desulfobacterota_I;c__Desulfovibrionia;o__Desulfovibrionales;f__Desulfovibrionaceae;g__Mailhella;s__Mailhella_merdavium	Mailhella_merdavium	Mailhella
d__Bacteria;p__Firmicutes;c__Bacilli;o__Erysipelotrichales;f__Coprobacillaceae;g__Catenibacterium;s__Catenibacterium_mitsuokai	Catenibacterium_mitsuokai	Catenibacterium
d__Bacteria;p__Firmicutes;c__Bacilli;o__Erysipelotrichales;f__Coprobacillaceae;g__Catenibacterium;s__Catenibacterium_sp000437715	Catenibacterium_sp000437715	Catenibacterium
d__Bacteria;p__Firmicutes;c__Bacilli;o__Erysipelotrichales;f__Coprobacillaceae;g__Coprobacillus;s__Coprobacillus_cateniformis	Coprobacillus_cateniformis	Coprobacillus
d__Bacteria;p__Firmicutes;c__Bacilli;o__Erysipelotrichales;f__Coprobacillaceae;g__Erysipelatoclostridium;s__Erysipelatoclostridium_cocleatum	Erysipelatoclostridium_cocleatum	Erysipelatoclostridium
d__Bacteria;p__Firmicutes;c__Bacilli;o__Erysipelotrichales;f__Coprobacillaceae;g__Erysipelatoclostridium;s__Erysipelatoclostridium_merdavium	Erysipelatoclostridium_merdavium	Erysipelatoclostridium
d__Bacteria;p__Firmicutes;c__Bacilli;o__Erysipelotrichales;f__Coprobacillaceae;g__Erysipelatoclostridium;s__Erysipelatoclostridium_ramosum	Erysipelatoclostridium_ramosum	Erysipelatoclostridium
d__Bacteria;p__Firmicutes;c__Bacilli;o__Erysipelotrichales;f__Coprobacillaceae;g__Erysipelatoclostridium;s__Erysipelatoclostridium_sp000508865	Erysipelatoclostridium_sp000508865	Erysipelatoclostridium
d__Bacteria;p__Firmicutes;c__Bacilli;o__Erysipelotrichales;f__Coprobacillaceae;g__Erysipelatoclostridium;s__Erysipelatoclostridium_spiroforme	Erysipelatoclostridium_spiroforme	Erysipelatoclostridium
d__Bacteria;p__Firmicutes;c__Bacilli;o__Erysipelotrichales;f__Coprobacillaceae;g__Erysipelatoclostridium;s__Erysipelatoclostridium_spiroforme_A	Erysipelatoclostridium_spiroforme_A	Erysipelatoclostridium
d__Bacteria;p__Firmicutes;c__Bacilli;o__Erysipelotrichales;f__Coprobacillaceae;g__Faecalibacillus;s__Faecalibacillus_faecis	Faecalibacillus_faecis	Faecalibacillus
d__Bacteria;p__Firmicutes;c__Bacilli;o__Erysipelotrichales;f__Coprobacillaceae;g__Faecalibacillus;s__Faecalibacillus_intestinalis	Faecalibacillus_intestinalis	Faecalibacillus
d__Bacteria;p__Firmicutes;c__Bacilli;o__Erysipelotrichales;f__Coprobacillaceae;g__Faecalibacillus;s__Faecalibacillus_sp003480255	Faecalibacillus_sp003480255	Faecalibacillus
d__Bacteria;p__Firmicutes;c__Bacilli;o__Erysipelotrichales;f__Coprobacillaceae;g__Faecalibacillus;s__Faecalibacillus_spiroforme_A	Faecalibacillus_spiroforme_A	Faecalibacillus
d__Bacteria;p__Firmicutes;c__Bacilli;o__Erysipelotrichales;f__Coprobacillaceae;g__Kandleria;s__Kandleria_vitulina	Kandleria_vitulina	Kandleria
d__Bacteria;p__Firmicutes;c__Bacilli;o__Erysipelotrichales;f__Coprobacillaceae;g__Longibaculum;s__Longibaculum_muris	Longibaculum_muris	Longibaculum
d__Bacteria;p__Firmicutes;c__Bacilli;o__Erysipelotrichales;f__Coprobacillaceae;g__MGBC113645;s__MGBC113645_sp910579135	MGBC113645_sp910579135	MGBC113645
d__Bacteria;p__Firmicutes;c__Bacilli;o__Erysipelotrichales;f__Coprobacillaceae;g__MGBC140090;s__unknown	unknown	unknown
d__Bacteria;p__Firmicutes;c__Bacilli;o__Erysipelotrichales;f__Coprobacillaceae;g__MGBC163490;s__MGBC163490_sp910588075	MGBC163490_sp910588075	MGBC163490
d__Bacteria;p__Firmicutes;c__Bacilli;o__Erysipelotrichales;f__Coprobacillaceae;g__Massiliomicrobiota;s__Massiliomicrobiota_merdigallinarum	Massiliomicrobiota_merdigallinarum	Massiliomicrobiota
d__Bacteria;p__Firmicutes;c__Bacilli;o__Erysipelotrichales;f__Coprobacillaceae;g__Stoquefichus;s__Stoquefichus_massiliensis	Stoquefichus_massiliensis	Stoquefichus
d__Bacteria;p__Firmicutes;c__Bacilli;o__Erysipelotrichales;f__Coprobacillaceae;g__Stoquefichus;s__Stoquefichus_sp001244545	Stoquefichus_sp001244545	Stoquefichus
d__Bacteria;p__Firmicutes;c__Bacilli;o__Erysipelotrichales;f__Erysipelotrichaceae;g__Amedibacterium;s__Amedibacterium_intestinale	Amedibacterium_intestinale	Amedibacterium
d__Bacteria;p__Firmicutes;c__Bacilli;o__Erysipelotrichales;f__Erysipelotrichaceae;g__Bulleidia;s__Bulleidia_sp900539965	Bulleidia_sp900539965	Bulleidia
d__Bacteria;p__Firmicutes;c__Bacilli;o__Erysipelotrichales;f__Erysipelotrichaceae;g__Clostridium_AQ;s__Clostridium_AQ_innocuum	Clostridium_AQ_innocuum	Clostridium
d__Bacteria;p__Firmicutes;c__Bacilli;o__Erysipelotrichales;f__Erysipelotrichaceae;g__Clostridium_AQ;s__Clostridium_AQ_sp000165065	Clostridium_AQ_sp000165065	Clostridium
d__Bacteria;p__Firmicutes;c__Bacilli;o__Erysipelotrichales;f__Erysipelotrichaceae;g__Clostridium_AQ;s__Clostridium_AQ_sp003481775	Clostridium_AQ_sp003481775	Clostridium
d__Bacteria;p__Firmicutes;c__Bacilli;o__Erysipelotrichales;f__Erysipelotrichaceae;g__Dielma;s__Dielma_fastidiosa	Dielma_fastidiosa	Dielma
d__Bacteria;p__Firmicutes;c__Bacilli;o__Erysipelotrichales;f__Erysipelotrichaceae;g__Faecalicoccus;s__Faecalicoccus_acidiformans	Faecalicoccus_acidiformans	Faecalicoccus
d__Bacteria;p__Firmicutes;c__Bacilli;o__Erysipelotrichales;f__Erysipelotrichaceae;g__Floccifex;s__Floccifex_porci	Floccifex_porci	Floccifex
d__Bacteria;p__Firmicutes;c__Bacilli;o__Erysipelotrichales;f__Erysipelotrichaceae;g__Holdemanella;s__Holdemanella_biformis	Holdemanella_biformis	Holdemanella
d__Bacteria;p__Firmicutes;c__Bacilli;o__Erysipelotrichales;f__Erysipelotrichaceae;g__Holdemanella;s__Holdemanella_porci	Holdemanella_porci	Holdemanella
d__Bacteria;p__Firmicutes;c__Bacilli;o__Erysipelotrichales;f__Erysipelotrichaceae;g__Holdemanella;s__Holdemanella_sp003458715	Holdemanella_sp003458715	Holdemanella
d__Bacteria;p__Firmicutes;c__Bacilli;o__Erysipelotrichales;f__Erysipelotrichaceae;g__Holdemanella;s__unknown	unknown	unknown
d__Bacteria;p__Firmicutes;c__Bacilli;o__Erysipelotrichales;f__Erysipelotrichaceae;g__Holdemania;s__Holdemania_massiliensis	Holdemania_massiliensis	Holdemania
d__Bacteria;p__Firmicutes;c__Bacilli;o__Erysipelotrichales;f__Erysipelotrichaceae;g__Longicatena;s__Longicatena_caecimuris	Longicatena_caecimuris	Longicatena
d__Bacteria;p__Firmicutes;c__Bacilli;o__Erysipelotrichales;f__Erysipelotrichaceae;g__Merdibacter;s__Merdibacter_massiliensis	Merdibacter_massiliensis	Merdibacter
d__Bacteria;p__Firmicutes;c__Bacilli;o__Haloplasmatales_A;f__Turicibacteraceae;g__Turicibacter;s__Turicibacter_sp001543345	Turicibacter_sp001543345	Turicibacter
d__Bacteria;p__Firmicutes;c__Bacilli;o__Lactobacillales;f__Aerococcaceae;g__Granulicatella;s__Granulicatella_sp001058355	Granulicatella_sp001058355	Granulicatella
d__Bacteria;p__Firmicutes;c__Bacilli;o__Lactobacillales;f__Aerococcaceae;g__Granulicatella;s__unknown	unknown	unknown
d__Bacteria;p__Firmicutes;c__Bacilli;o__Lactobacillales;f__Enterococcaceae;g__Enterococcus;s__Enterococcus_faecalis	Enterococcus_faecalis	Enterococcus
d__Bacteria;p__Firmicutes;c__Bacilli;o__Lactobacillales;f__Enterococcaceae;g__Enterococcus;s__Enterococcus_rivorum	Enterococcus_rivorum	Enterococcus
d__Bacteria;p__Firmicutes;c__Bacilli;o__Lactobacillales;f__Enterococcaceae;g__Enterococcus_A;s__Enterococcus_A_avium	Enterococcus_A_avium	Enterococcus
d__Bacteria;p__Firmicutes;c__Bacilli;o__Lactobacillales;f__Enterococcaceae;g__Enterococcus_A;s__Enterococcus_A_dongliensis	Enterococcus_A_dongliensis	Enterococcus
d__Bacteria;p__Firmicutes;c__Bacilli;o__Lactobacillales;f__Enterococcaceae;g__Enterococcus_A;s__Enterococcus_A_florum	Enterococcus_A_florum	Enterococcus
[truncated: 1,222 more rows]
